# Supplementary material for: Recalibrating differential gene expression by genetic dosage variance prioritizes functionally relevant genes
Source: Genome Res. 2025 Oct;35(10):2316–25. doi: 10.1101/gr.280360.124 (PMC12487816; doi:10.1101/gr.280360.124)
Supplement: Supplement 2 [file Supplemental_Table_S1.xlsx]

## Sheet: Supplemental Table S1
term_name	term_size	query_size	source	p_value_fc	intersection_size_fc	p_value_sdg	intersection_size_sdg	term_id	classification
immune response	1678	2000	GO:BP	8.83981e-53	335	9.93691e-27	277	GO:0006955	response
immune system process	2417	2000	GO:BP	2.50745e-48	415	8.10002e-25	354	GO:0002376	other
defense response	1598	2000	GO:BP	3.87071e-44	307	5.38824e-21	252	GO:0006952	response
response to other organism	1364	2000	GO:BP	4.2632e-44	277	2.09025e-24	234	GO:0051707	response
response to external biotic stimulus	1366	2000	GO:BP	5.7419e-44	277	2.59203e-24	234	GO:0043207	response
response to biotic stimulus	1398	2000	GO:BP	6.51347e-43	279	8.89211e-25	239	GO:0009607	response
biological process involved in interspecies interaction between organisms	1532	2000	GO:BP	1.54286e-40	291	2.35258e-23	251	GO:0044419	other
defense response to other organism	1071	2000	GO:BP	6.4165e-38	226	8.6505e-22	192	GO:0098542	response
defense response to symbiont	983	2000	GO:BP	6.95868e-38	214	2.4898e-21	180	GO:0140546	response
innate immune response	845	2000	GO:BP	1.80574e-37	194	2.40185e-19	158	GO:0045087	response
response to external stimulus	2441	2000	GO:BP	4.6749e-36	387	3.02988e-26	361	GO:0009605	response
response to cytokine	851	2000	GO:BP	6.58353e-36	192	9.25158e-27	175	GO:0034097	response
positive regulation of immune system process	978	2000	GO:BP	1.2341e-35	209	3.94386e-17	169	GO:0002684	regulation
response to stimulus	7735	2000	GO:BP	4.44585e-35	903	2.38155e-47	951	GO:0050896	response
regulation of immune system process	1407	2000	GO:BP	5.26797e-34	261	4.13925e-16	216	GO:0002682	regulation
regulation of immune response	821	2000	GO:BP	2.95068e-32	181	2.03973e-16	148	GO:0050776	regulation & response
positive regulation of immune response	664	2000	GO:BP	2.62599e-31	157	6.43852e-16	127	GO:0050778	regulation & response
cellular response to cytokine stimulus	764	2000	GO:BP	1.24786e-30	170	7.30618e-21	151	GO:0071345	response
cytokine-mediated signaling pathway	445	2000	GO:BP	9.94192e-28	118	1.437e-15	97	GO:0019221	other
cellular response to stimulus	6411	2000	GO:BP	2.60695e-27	753	2.40746e-46	825	GO:0051716	response
cell communication	5601	2000	GO:BP	4.28792e-26	673	5.57344e-40	727	GO:0007154	other
cellular response to organic substance	1811	2000	GO:BP	4.73209e-26	289	1.61954e-25	289	GO:0071310	response
response to stress	3536	2000	GO:BP	6.14888e-26	472	3.58353e-25	472	GO:0006950	response
signaling	5515	2000	GO:BP	1.31472e-25	663	5.32203e-41	722	GO:0023052	other
response to organic substance	2433	2000	GO:BP	1.59702e-25	356	7.36444e-27	362	GO:0010033	response
positive regulation of response to stimulus	2129	2000	GO:BP	3.51042e-24	319	3.33996e-19	305	GO:0048584	regulation & response
regulation of response to external stimulus	1010	2000	GO:BP	4.12421e-24	189	1.42697e-17	174	GO:0032101	regulation & response
response to chemical	3317	2000	GO:BP	1.07295e-23	442	3.07946e-28	460	GO:0042221	response
signal transduction	5074	2000	GO:BP	1.64886e-23	613	1.16888e-34	658	GO:0007165	other
leukocyte activation	891	2000	GO:BP	2.87534e-23	172	1.24761e-14	152	GO:0045321	other
cell activation	1029	2000	GO:BP	4.3909e-23	189	8.56983e-14	166	GO:0001775	other
cellular response to chemical stimulus	2478	2000	GO:BP	9.65396e-23	352	3.15383e-27	368	GO:0070887	response
response to type II interferon	138	2000	GO:BP	5.54934e-22	56	2.12378e-07	37	GO:0034341	response
regulation of defense response	718	2000	GO:BP	1.14886e-21	146	1.73704e-13	128	GO:0031347	regulation & response
regulation of response to biotic stimulus	463	2000	GO:BP	2.32367e-21	110	1.18733e-10	89	GO:0002831	regulation & response
positive regulation of response to external stimulus	566	2000	GO:BP	5.48562e-21	124	7.48542e-12	105	GO:0032103	regulation & response
regulation of multicellular organismal process	2767	2000	GO:BP	2.42914e-20	374	3.62567e-21	379	GO:0051239	regulation
adaptive immune response	557	2000	GO:BP	4.35396e-20	121	1.05041e-08	96	GO:0002250	response
inflammatory response	770	2000	GO:BP	6.64248e-20	149	5.46174e-09	122	GO:0006954	response
immune effector process	623	2000	GO:BP	1.37426e-19	129	1.83958e-09	106	GO:0002252	other
response to bacterium	616	2000	GO:BP	1.46663e-19	128	4.94539e-09	104	GO:0009617	response
positive regulation of defense response	433	2000	GO:BP	2.4083e-19	102	1.29854e-10	85	GO:0031349	regulation & response
T cell activation	518	2000	GO:BP	9.21663e-19	113	1.24319e-10	96	GO:0042110	other
biological regulation	10545	2000	GO:BP	9.77613e-19	1075	6.8307e-52	1211	GO:0065007	regulation
cytokine production	731	2000	GO:BP	1.44872e-18	141	3.00935e-13	129	GO:0001816	other
regulation of response to stimulus	3664	2000	GO:BP	1.62665e-18	457	4.92263e-26	488	GO:0048583	regulation & response
regulation of cytokine production	725	2000	GO:BP	1.83231e-18	140	3.82253e-13	128	GO:0001817	regulation
regulation of biological process	10181	2000	GO:BP	4.61812e-18	1041	1.05307e-54	1189	GO:0050789	regulation
positive regulation of biological process	5740	2000	GO:BP	5.73709e-18	651	2.61486e-36	728	GO:0048518	regulation
cell surface receptor signaling pathway	2574	2000	GO:BP	5.67086e-17	342	1.63984e-21	360	GO:0007166	other
lymphocyte activation	732	2000	GO:BP	2.53502e-16	136	1.16914e-11	125	GO:0046649	other
negative regulation of immune system process	475	2000	GO:BP	3.3672e-16	102	3.72809e-09	87	GO:0002683	regulation
regulation of innate immune response	383	2000	GO:BP	3.42229e-16	89	8.99291e-08	72	GO:0045088	regulation & response
positive regulation of cytokine production	461	2000	GO:BP	3.62867e-16	100	6.70935e-10	87	GO:0001819	regulation
multicellular organismal process	6666	2000	GO:BP	3.86543e-16	726	2.08593e-32	801	GO:0032501	other
activation of immune response	493	2000	GO:BP	5.75134e-16	104	1.19249e-08	88	GO:0002253	response
regulation of cell activation	588	2000	GO:BP	1.20328e-15	116	1.5614e-11	107	GO:0050865	regulation
G protein-coupled receptor signaling pathway	770	2000	GO:BP	1.36687e-15	139	1.12005e-07	118	GO:0007186	other
response to tumor necrosis factor	239	2000	GO:BP	1.42799e-15	66	1.69334e-09	56	GO:0034612	response
chemokine-mediated signaling pathway	83	2000	GO:BP	1.5977e-15	37	1.72162e-05	25	GO:0070098	other
response to chemokine	92	2000	GO:BP	1.61351e-15	39	3.82276e-05	26	GO:1990868	response
cellular response to chemokine	92	2000	GO:BP	1.61351e-15	39	3.82276e-05	26	GO:1990869	response
regulation of leukocyte activation	538	2000	GO:BP	1.85898e-15	109	3.03341e-11	100	GO:0002694	regulation
regulation of cellular process	9663	2000	GO:BP	2.13534e-15	983	1.74725e-53	1141	GO:0050794	regulation
positive regulation of cellular process	5248	2000	GO:BP	4.12404e-15	592	1.48281e-35	678	GO:0048522	regulation
defense response to virus	282	2000	GO:BP	4.38573e-15	72	6.30997e-15	72	GO:0051607	response
response to virus	371	2000	GO:BP	5.78332e-15	85	7.27383e-16	87	GO:0009615	response
positive regulation of response to biotic stimulus	337	2000	GO:BP	6.24395e-15	80	1.85557e-06	63	GO:0002833	regulation & response
positive regulation of multicellular organismal process	1535	2000	GO:BP	8.05689e-15	225	2.96787e-13	221	GO:0051240	regulation
cell chemotaxis	292	2000	GO:BP	9.01948e-15	73	0.000110206	53	GO:0060326	other
adaptive immune response based on somatic recombination of immune receptors built from immunoglobulin superfamily domains	328	2000	GO:BP	1.48705e-14	78	1.0706e-10	71	GO:0002460	response
regulation of leukocyte cell-cell adhesion	349	2000	GO:BP	1.61646e-14	81	2.15613e-08	69	GO:1903037	regulation
cellular response to tumor necrosis factor	219	2000	GO:BP	1.92681e-14	61	2.25559e-08	51	GO:0071356	response
leukocyte cell-cell adhesion	386	2000	GO:BP	2.30892e-14	86	1.82731e-08	74	GO:0007159	other
regulation of T cell activation	359	2000	GO:BP	2.79725e-14	82	1.06463e-08	71	GO:0050863	regulation
response to molecule of bacterial origin	329	2000	GO:BP	6.39806e-14	77	1.20346e-09	69	GO:0002237	response
positive regulation of innate immune response	316	2000	GO:BP	7.24288e-14	75	9.22195e-07	61	GO:0045089	regulation & response
lymphocyte mediated immunity	312	2000	GO:BP	1.22722e-13	74	6.96733e-05	56	GO:0002449	other
leukocyte migration	376	2000	GO:BP	1.54472e-13	83	1.74065e-06	68	GO:0050900	other
cellular response to type II interferon	118	2000	GO:BP	1.59736e-13	42	0.00754637	26	GO:0071346	response
leukocyte chemotaxis	224	2000	GO:BP	2.71315e-13	60	0.0069973	40	GO:0030595	other
leukocyte mediated immunity	410	2000	GO:BP	3.55198e-13	87	0.000719901	65	GO:0002443	other
response to lipopolysaccharide	312	2000	GO:BP	4.36999e-13	73	8.19376e-10	67	GO:0032496	response
regulation of immune effector process	354	2000	GO:BP	4.52128e-13	79	2.16294e-06	65	GO:0002697	regulation
regulation of lymphocyte activation	475	2000	GO:BP	8.04936e-13	95	9.52795e-09	86	GO:0051249	regulation
leukocyte differentiation	576	2000	GO:BP	8.70855e-13	108	2.39149e-09	100	GO:0002521	other
cell killing	198	2000	GO:BP	8.99403e-13	55	1	-1	GO:0001906	other
antigen processing and presentation	109	2000	GO:BP	1.65359e-12	39	1	-1	GO:0019882	other
monocyte chemotaxis	62	2000	GO:BP	1.9478e-12	29	1	-1	GO:0002548	other
nuclear division	430	2000	GO:BP	2.3934e-12	88	1.04735e-11	87	GO:0000280	other
mitotic nuclear division	269	2000	GO:BP	3.71087e-12	65	1.37955e-12	66	GO:0140014	other
lymphocyte chemotaxis	59	2000	GO:BP	3.81031e-12	28	0.0369686	16	GO:0048247	other
immune response-regulating signaling pathway	459	2000	GO:BP	5.95975e-12	91	4.84228e-06	77	GO:0002764	response
response to interleukin-1	124	2000	GO:BP	7.17424e-12	41	1.42808e-07	35	GO:0070555	response
chemotaxis	423	2000	GO:BP	7.60947e-12	86	2.4414e-07	76	GO:0006935	other
taxis	424	2000	GO:BP	8.79199e-12	86	2.73764e-07	76	GO:0042330	other
positive regulation of cell activation	352	2000	GO:BP	1.11809e-11	76	3.24123e-08	69	GO:0050867	regulation
positive regulation of leukocyte mediated immunity	137	2000	GO:BP	1.26789e-11	43	0.00159012	30	GO:0002705	regulation
regulation of cell-cell adhesion	458	2000	GO:BP	1.48053e-11	90	5.40772e-08	82	GO:0022407	regulation
regulation of cell killing	100	2000	GO:BP	1.70854e-11	36	1	-1	GO:0031341	regulation
cellular response to interleukin-1	100	2000	GO:BP	1.70854e-11	36	1.26299e-07	31	GO:0071347	response
peptide antigen assembly with MHC class II protein complex	13	2000	GO:BP	1.79394e-11	13	1	-1	GO:0002503	other
MHC class II protein complex assembly	13	2000	GO:BP	1.79394e-11	13	1	-1	GO:0002399	other
mononuclear cell migration	194	2000	GO:BP	2.82593e-11	52	0.000415841	39	GO:0071674	other
positive regulation of immune effector process	233	2000	GO:BP	3.04067e-11	58	6.17038e-05	46	GO:0002699	regulation
immune response-activating signaling pathway	433	2000	GO:BP	3.1414e-11	86	1.81562e-06	75	GO:0002757	response
mitotic sister chromatid segregation	182	2000	GO:BP	3.15602e-11	50	7.13412e-10	48	GO:0000070	other
regulation of lymphocyte mediated immunity	170	2000	GO:BP	3.36495e-11	48	0.00279005	34	GO:0002706	regulation
positive regulation of leukocyte activation	338	2000	GO:BP	3.80727e-11	73	1.33202e-08	68	GO:0002696	regulation
regulation of adaptive immune response based on somatic recombination of immune receptors built from immunoglobulin superfamily domains	177	2000	GO:BP	4.17677e-11	49	1.53718e-08	45	GO:0002822	regulation & response
regulation of leukocyte mediated immunity	228	2000	GO:BP	4.19976e-11	57	0.0109533	40	GO:0002703	regulation
eosinophil migration	29	2000	GO:BP	4.8332e-11	19	1	-1	GO:0072677	other
positive regulation of lymphocyte mediated immunity	115	2000	GO:BP	7.50045e-11	38	0.0013176	27	GO:0002708	regulation
regulation of adaptive immune response	192	2000	GO:BP	7.51276e-11	51	1.55504e-09	49	GO:0002819	regulation & response
regulation of type II interferon production	110	2000	GO:BP	8.6274e-11	37	0.00639472	25	GO:0032649	regulation
mitotic cell cycle	860	2000	GO:BP	8.98098e-11	137	3.98057e-18	157	GO:0000278	other
regulation of response to stress	1263	2000	GO:BP	9.08549e-11	182	5.47466e-12	187	GO:0080134	regulation & response
mitotic cell cycle process	715	2000	GO:BP	9.12676e-11	120	2.80619e-15	132	GO:1903047	other
lymphocyte migration	116	2000	GO:BP	1.02755e-10	38	0.0174763	25	GO:0072676	other
alpha-beta T cell activation	169	2000	GO:BP	1.17826e-10	47	6.42273e-10	46	GO:0046631	other
type II interferon production	111	2000	GO:BP	1.19217e-10	37	0.00760879	25	GO:0032609	other
intracellular signal transduction	2503	2000	GO:BP	1.46079e-10	309	5.4222e-29	376	GO:0035556	other
regulation of leukocyte differentiation	304	2000	GO:BP	1.65014e-10	67	3.90231e-06	58	GO:1902105	regulation
organelle fission	477	2000	GO:BP	1.7968e-10	90	7.00557e-10	89	GO:0048285	other
hemopoiesis	886	2000	GO:BP	1.94703e-10	139	3.17254e-11	142	GO:0030097	other
cell population proliferation	1845	2000	GO:BP	2.14627e-10	242	1.97139e-20	278	GO:0008283	other
ERK1 and ERK2 cascade	299	2000	GO:BP	2.34524e-10	66	1.47769e-05	56	GO:0070371	other
neutrophil migration	119	2000	GO:BP	2.578e-10	38	1	-1	GO:1990266	other
positive regulation of leukocyte cell-cell adhesion	258	2000	GO:BP	2.78317e-10	60	2.96114e-05	50	GO:1903039	regulation
antigen processing and presentation of exogenous antigen	46	2000	GO:BP	3.0595e-10	23	1	-1	GO:0019884	other
positive regulation of cell killing	68	2000	GO:BP	3.29291e-10	28	1	-1	GO:0031343	regulation
regulation of cell development	788	2000	GO:BP	3.39445e-10	127	3.1054e-15	141	GO:0060284	regulation
eosinophil chemotaxis	25	2000	GO:BP	4.59712e-10	17	1	-1	GO:0048245	other
neutrophil chemotaxis	99	2000	GO:BP	4.65401e-10	34	1	-1	GO:0030593	other
mononuclear cell differentiation	446	2000	GO:BP	5.00335e-10	85	3.40786e-08	81	GO:1903131	other
myeloid leukocyte migration	221	2000	GO:BP	5.56564e-10	54	0.00192215	41	GO:0097529	other
granulocyte migration	145	2000	GO:BP	5.68009e-10	42	1	-1	GO:0097530	other
MHC protein complex assembly	17	2000	GO:BP	7.8786e-10	14	1	-1	GO:0002396	other
peptide antigen assembly with MHC protein complex	17	2000	GO:BP	7.8786e-10	14	1	-1	GO:0002501	other
regulation of leukocyte proliferation	250	2000	GO:BP	7.92886e-10	58	1.22787e-07	54	GO:0070663	regulation
positive regulation of T cell activation	237	2000	GO:BP	9.02097e-10	56	0.000105734	46	GO:0050870	regulation
leukocyte proliferation	315	2000	GO:BP	9.71939e-10	67	1.20765e-08	65	GO:0070661	other
negative regulation of viral process	91	2000	GO:BP	1.12059e-09	32	0.000559435	24	GO:0048525	regulation
regulation of leukocyte mediated cytotoxicity	86	2000	GO:BP	1.2013e-09	31	1	-1	GO:0001910	regulation
negative regulation of biological process	4912	2000	GO:BP	1.25036e-09	532	4.99273e-34	640	GO:0048519	regulation
regulation of hemopoiesis	385	2000	GO:BP	1.50252e-09	76	3.01289e-07	71	GO:1903706	regulation
cell activation involved in immune response	275	2000	GO:BP	1.60158e-09	61	6.41261e-10	62	GO:0002263	response
antigen processing and presentation of peptide antigen	67	2000	GO:BP	1.66998e-09	27	1	-1	GO:0048002	other
cell cycle process	1207	2000	GO:BP	2.49457e-09	171	1.10678e-15	192	GO:0022402	other
leukocyte activation involved in immune response	271	2000	GO:BP	2.68839e-09	60	1.07287e-09	61	GO:0002366	response
positive regulation of ERK1 and ERK2 cascade	196	2000	GO:BP	2.83328e-09	49	1	-1	GO:0070374	regulation
T cell proliferation	203	2000	GO:BP	3.06993e-09	50	6.4183e-06	44	GO:0042098	other
granulocyte chemotaxis	122	2000	GO:BP	3.18065e-09	37	1	-1	GO:0071621	other
antigen processing and presentation of exogenous peptide antigen	38	2000	GO:BP	3.46342e-09	20	1	-1	GO:0002478	other
regulation of mitotic nuclear division	117	2000	GO:BP	3.94602e-09	36	4.69665e-09	36	GO:0007088	regulation
T cell activation involved in immune response	101	2000	GO:BP	5.1339e-09	33	8.27424e-07	30	GO:0002286	response
regulation of cell population proliferation	1550	2000	GO:BP	5.44246e-09	206	4.34298e-17	235	GO:0042127	regulation
regulation of viral life cycle	136	2000	GO:BP	5.68615e-09	39	0.000117718	32	GO:1903900	regulation
positive regulation of cell-cell adhesion	305	2000	GO:BP	6.11908e-09	64	0.000194837	54	GO:0022409	regulation
activation of innate immune response	255	2000	GO:BP	6.48118e-09	57	1.98352e-05	50	GO:0002218	response
cell-cell adhesion	883	2000	GO:BP	6.56947e-09	134	1.36924e-06	127	GO:0098609	other
regulation of cell adhesion	743	2000	GO:BP	6.92333e-09	118	2.22515e-07	114	GO:0030155	regulation
positive regulation of leukocyte mediated cytotoxicity	61	2000	GO:BP	7.5139e-09	25	1	-1	GO:0001912	regulation
sister chromatid segregation	222	2000	GO:BP	8.83441e-09	52	1.11999e-08	52	GO:0000819	other
regulation of mononuclear cell proliferation	229	2000	GO:BP	9.04139e-09	53	4.1905e-07	50	GO:0032944	regulation
leukocyte mediated cytotoxicity	126	2000	GO:BP	9.39264e-09	37	1	-1	GO:0001909	other
positive regulation of lymphocyte activation	308	2000	GO:BP	9.63852e-09	64	2.41543e-06	59	GO:0051251	regulation
innate immune response-activating signaling pathway	237	2000	GO:BP	1.09332e-08	54	1.3193e-05	48	GO:0002758	response
negative regulation of viral genome replication	53	2000	GO:BP	1.3124e-08	23	0.0385427	15	GO:0045071	regulation
regulation of cell communication	3199	2000	GO:BP	1.33244e-08	367	2.75572e-23	431	GO:0010646	regulation
negative regulation of multicellular organismal process	1046	2000	GO:BP	1.36376e-08	151	4.02403e-11	160	GO:0051241	regulation
regulation of lymphocyte proliferation	225	2000	GO:BP	1.52459e-08	52	2.19018e-06	48	GO:0050670	regulation
response to lipid	858	2000	GO:BP	1.57474e-08	130	4.20732e-07	126	GO:0033993	response
regulation of T cell proliferation	172	2000	GO:BP	1.70813e-08	44	1.32008e-05	39	GO:0042129	regulation
positive regulation of signal transduction	1474	2000	GO:BP	1.87683e-08	196	2.77745e-10	204	GO:0009967	regulation
regulation of ERK1 and ERK2 cascade	276	2000	GO:BP	1.94235e-08	59	0.00169685	48	GO:0070372	regulation
mononuclear cell proliferation	284	2000	GO:BP	2.17605e-08	60	7.39092e-07	57	GO:0032943	other
lymphocyte proliferation	277	2000	GO:BP	2.27301e-08	59	6.35922e-06	54	GO:0046651	other
leukocyte apoptotic process	112	2000	GO:BP	2.47301e-08	34	0.00903007	25	GO:0071887	other
positive regulation of cell communication	1663	2000	GO:BP	2.47647e-08	215	2.71086e-10	224	GO:0010647	regulation
nuclear chromosome segregation	307	2000	GO:BP	2.49452e-08	63	3.27552e-08	63	GO:0098813	other
lymphocyte differentiation	399	2000	GO:BP	2.60517e-08	75	6.15951e-07	72	GO:0030098	other
cell cycle	1694	2000	GO:BP	2.7156e-08	218	2.89929e-15	245	GO:0007049	other
regulation of multicellular organismal development	1319	2000	GO:BP	3.00602e-08	179	8.52893e-14	199	GO:2000026	regulation
positive regulation of adaptive immune response based on somatic recombination of immune receptors built from immunoglobulin superfamily domains	113	2000	GO:BP	3.25931e-08	34	0.000245677	28	GO:0002824	regulation & response
pattern recognition receptor signaling pathway	223	2000	GO:BP	3.67009e-08	51	1.48966e-05	46	GO:0002221	other
regulation of nuclear division	144	2000	GO:BP	3.98001e-08	39	4.77079e-08	39	GO:0051783	regulation
positive regulation of type II interferon production	70	2000	GO:BP	4.04214e-08	26	1	-1	GO:0032729	regulation
positive regulation of intracellular signal transduction	980	2000	GO:BP	4.59418e-08	142	9.59739e-09	145	GO:1902533	regulation
positive regulation of signaling	1666	2000	GO:BP	5.10411e-08	214	5.93406e-10	223	GO:0023056	regulation
regulation of leukocyte migration	218	2000	GO:BP	5.17801e-08	50	2.26239e-06	47	GO:0002685	regulation
regulation of cell cycle process	689	2000	GO:BP	6.07086e-08	109	7.28142e-10	115	GO:0010564	regulation
negative regulation of response to stimulus	1552	2000	GO:BP	6.14532e-08	202	2.25917e-16	233	GO:0048585	regulation & response
negative regulation of cell cycle process	291	2000	GO:BP	6.27569e-08	60	2.7057e-08	61	GO:0010948	regulation
cellular response to lipopolysaccharide	199	2000	GO:BP	6.95593e-08	47	8.59096e-08	47	GO:0071222	response
negative regulation of immune response	179	2000	GO:BP	7.20307e-08	44	0.000407491	37	GO:0050777	regulation & response
regulation of viral process	160	2000	GO:BP	8.2659e-08	41	0.000635656	34	GO:0050792	regulation
regulation of intracellular signal transduction	1665	2000	GO:BP	8.34293e-08	213	7.44515e-17	247	GO:1902531	regulation
cell adhesion	1413	2000	GO:BP	8.89385e-08	187	0.000152802	174	GO:0007155	other
response to oxygen-containing compound	1550	2000	GO:BP	9.5971e-08	201	3.34765e-12	219	GO:1901700	response
cell death	1826	2000	GO:BP	9.69493e-08	229	2.7417e-17	266	GO:0008219	other
T cell differentiation	294	2000	GO:BP	9.74881e-08	60	1.25945e-07	60	GO:0030217	other
positive regulation of gene expression	1093	2000	GO:BP	1.04267e-07	153	8.51882e-10	161	GO:0010628	regulation
antigen processing and presentation of exogenous peptide antigen via MHC class II	28	2000	GO:BP	1.14921e-07	16	1	-1	GO:0019886	other
cellular response to molecule of bacterial origin	209	2000	GO:BP	1.23015e-07	48	1.52189e-07	48	GO:0071219	response
regulation of signaling	3194	2000	GO:BP	1.43219e-07	361	2.63789e-22	427	GO:0023051	regulation
cell migration	1402	2000	GO:BP	1.46189e-07	185	2.03141e-13	207	GO:0016477	other
positive regulation of adaptive immune response	119	2000	GO:BP	1.58262e-07	34	0.000782811	28	GO:0002821	regulation & response
negative regulation of response to external stimulus	384	2000	GO:BP	2.00179e-07	71	3.8203e-08	73	GO:0032102	regulation & response
T cell mediated immunity	114	2000	GO:BP	2.04601e-07	33	1	-1	GO:0002456	other
programmed cell death	1822	2000	GO:BP	2.2237e-07	227	8.24612e-17	264	GO:0012501	other
antigen processing and presentation of endogenous antigen	29	2000	GO:BP	2.36668e-07	16	1	-1	GO:0019883	other
positive regulation of cell adhesion	458	2000	GO:BP	2.3985e-07	80	0.00106035	70	GO:0045785	regulation
positive regulation of inflammatory response	133	2000	GO:BP	2.40164e-07	36	6.68947e-05	32	GO:0050729	regulation & response
regulation of signal transduction	2801	2000	GO:BP	2.9349e-07	322	1.60636e-18	373	GO:0009966	regulation
cellular process	14488	2000	GO:BP	3.02048e-07	1327	1.59634e-47	1511	GO:0009987	other
regulation of MAPK cascade	612	2000	GO:BP	3.14467e-07	98	9.18418e-08	100	GO:0043408	regulation
negative regulation of cellular process	4612	2000	GO:BP	3.3173e-07	490	1.3179e-33	609	GO:0048523	regulation
chromosome segregation	405	2000	GO:BP	3.65519e-07	73	5.07304e-10	80	GO:0007059	other
intracellular signaling cassette	1742	2000	GO:BP	3.67061e-07	218	2.43473e-17	257	GO:0141124	other
negative regulation of cytokine production	274	2000	GO:BP	4.06028e-07	56	0.000553625	49	GO:0001818	regulation
negative regulation of cell cycle	374	2000	GO:BP	4.06375e-07	69	2.84954e-08	72	GO:0045786	regulation
regulation of viral genome replication	82	2000	GO:BP	4.12137e-07	27	0.0199	20	GO:0045069	regulation
alpha-beta T cell differentiation	117	2000	GO:BP	4.37068e-07	33	2.22745e-06	32	GO:0046632	other
viral life cycle	305	2000	GO:BP	4.5909e-07	60	3.06964e-05	56	GO:0019058	other
myeloid leukocyte activation	231	2000	GO:BP	4.67026e-07	50	0.000955965	43	GO:0002274	other
negative regulation of innate immune response	78	2000	GO:BP	6.56966e-07	26	1	-1	GO:0045824	regulation & response
regulation of programmed cell death	1371	2000	GO:BP	7.18479e-07	179	1.50135e-13	204	GO:0043067	regulation
biological_process	15507	2000	GO:BP	7.43325e-07	1405	2.15342e-47	1586	GO:0008150	other
regulation of chromosome separation	73	2000	GO:BP	7.47681e-07	25	8.36836e-07	25	GO:1905818	regulation
immune response-regulating cell surface receptor signaling pathway	309	2000	GO:BP	7.87062e-07	60	0.0411283	48	GO:0002768	response
antigen processing and presentation of peptide or polysaccharide antigen via MHC class II	35	2000	GO:BP	8.64866e-07	17	1	-1	GO:0002504	other
homeostatic process	1603	2000	GO:BP	1.03676e-06	202	2.47465e-08	210	GO:0042592	other
negative regulation of cell cycle phase transition	252	2000	GO:BP	1.25811e-06	52	5.19773e-07	53	GO:1901988	regulation
positive regulation of MAPK cascade	442	2000	GO:BP	1.47597e-06	76	0.000573434	69	GO:0043410	regulation
negative regulation of response to biotic stimulus	104	2000	GO:BP	1.58932e-06	30	1	-1	GO:0002832	regulation & response
humoral immune response	210	2000	GO:BP	1.62077e-06	46	1	-1	GO:0006959	response
antigen processing and presentation of peptide antigen via MHC class II	32	2000	GO:BP	1.64953e-06	16	1	-1	GO:0002495	other
regulation of inflammatory response	354	2000	GO:BP	1.67096e-06	65	2.16294e-06	65	GO:0050727	regulation & response
cellular response to biotic stimulus	233	2000	GO:BP	1.99959e-06	49	2.51742e-07	51	GO:0071216	response
regulation of T cell mediated immunity	88	2000	GO:BP	2.46865e-06	27	1	-1	GO:0002709	regulation
CD4-positive, alpha-beta T cell differentiation	88	2000	GO:BP	2.46865e-06	27	5.36926e-07	28	GO:0043367	other
regulation of natural killer cell mediated immunity	46	2000	GO:BP	2.54774e-06	19	1	-1	GO:0002715	regulation
positive regulation of programmed cell death	498	2000	GO:BP	2.67222e-06	82	6.88296e-07	84	GO:0043068	regulation
lymphocyte activation involved in immune response	185	2000	GO:BP	2.80244e-06	42	2.80174e-07	44	GO:0002285	response
apoptotic process	1753	2000	GO:BP	2.92977e-06	215	4.77509e-16	254	GO:0006915	other
CD4-positive, alpha-beta T cell activation	113	2000	GO:BP	3.25556e-06	31	1.83697e-07	33	GO:0035710	other
regulation of natural killer cell mediated cytotoxicity	42	2000	GO:BP	3.39324e-06	18	1	-1	GO:0042269	regulation
locomotion	1149	2000	GO:BP	3.91054e-06	153	6.82148e-12	174	GO:0040011	other
regulation of alpha-beta T cell activation	108	2000	GO:BP	4.3092e-06	30	4.91216e-06	30	GO:0046634	regulation
regulation of cell cycle	1029	2000	GO:BP	4.92162e-06	140	4.26486e-11	158	GO:0051726	regulation
T cell differentiation involved in immune response	79	2000	GO:BP	4.94409e-06	25	2.82857e-05	24	GO:0002292	response
regulation of developmental process	2276	2000	GO:BP	5.20066e-06	265	7.70274e-18	316	GO:0050793	regulation
regulation of leukocyte apoptotic process	85	2000	GO:BP	5.3814e-06	26	1	-1	GO:2000106	regulation
viral genome replication	122	2000	GO:BP	6.06312e-06	32	1	-1	GO:0019079	other
regulation of apoptotic process	1331	2000	GO:BP	6.16845e-06	171	1.9106e-12	196	GO:0042981	regulation
chromosome organization	585	2000	GO:BP	6.40405e-06	91	7.82719e-08	97	GO:0051276	other
chromosome separation	80	2000	GO:BP	6.63093e-06	25	7.38864e-06	25	GO:0051304	other
negative regulation of defense response	234	2000	GO:BP	7.02343e-06	48	0.000195429	45	GO:0031348	regulation & response
meiotic cell cycle phase transition	13	2000	GO:BP	7.35612e-06	10	1	-1	GO:0044771	other
positive regulation of mononuclear cell proliferation	136	2000	GO:BP	7.58014e-06	34	5.60058e-07	36	GO:0032946	regulation
negative regulation of leukocyte cell-cell adhesion	130	2000	GO:BP	8.47936e-06	33	0.00519748	28	GO:1903038	regulation
regulation of mitotic sister chromatid separation	59	2000	GO:BP	8.66245e-06	21	9.4693e-06	21	GO:0010965	regulation
antigen processing and presentation of endogenous peptide antigen	23	2000	GO:BP	9.3106e-06	13	1	-1	GO:0002483	other
viral process	410	2000	GO:BP	9.42846e-06	70	6.59073e-05	68	GO:0016032	other
cellular response to oxygen-containing compound	1100	2000	GO:BP	1.16543e-05	146	2.19889e-13	173	GO:1901701	response
regulation of lymphocyte differentiation	201	2000	GO:BP	1.22746e-05	43	4.49483e-05	42	GO:0045619	regulation
natural killer cell mediated immunity	71	2000	GO:BP	1.29774e-05	23	1	-1	GO:0002228	other
tumor necrosis factor superfamily cytokine production	159	2000	GO:BP	1.30676e-05	37	1.18533e-06	39	GO:0071706	other
regulation of tumor necrosis factor superfamily cytokine production	159	2000	GO:BP	1.30676e-05	37	1.18533e-06	39	GO:1903555	regulation
regulation of mitotic cell cycle	481	2000	GO:BP	1.36285e-05	78	2.83623e-12	95	GO:0007346	regulation
regulation of cell differentiation	1455	2000	GO:BP	1.42955e-05	182	2.56227e-18	228	GO:0045595	regulation
positive regulation of T cell mediated cytotoxicity	36	2000	GO:BP	1.45747e-05	16	1	-1	GO:0001916	regulation
cell development	2617	2000	GO:BP	1.57232e-05	295	1.64826e-18	354	GO:0048468	other
positive regulation of lymphocyte proliferation	133	2000	GO:BP	1.57329e-05	33	4.70066e-06	34	GO:0050671	regulation
regulation of cell cycle phase transition	416	2000	GO:BP	1.75068e-05	70	1.07925e-07	76	GO:1901987	regulation
positive regulation of developmental process	1243	2000	GO:BP	1.81143e-05	160	1.22036e-13	190	GO:0051094	regulation
MAPK cascade	705	2000	GO:BP	1.84117e-05	103	1.72915e-07	110	GO:0000165	other
spindle assembly checkpoint signaling	46	2000	GO:BP	1.96225e-05	18	0.000147643	17	GO:0071173	other
mitotic spindle checkpoint signaling	46	2000	GO:BP	1.96225e-05	18	0.000147643	17	GO:0071174	other
mitotic spindle assembly checkpoint signaling	46	2000	GO:BP	1.96225e-05	18	0.000147643	17	GO:0007094	other
positive regulation of cell population proliferation	873	2000	GO:BP	2.15657e-05	121	9.40217e-12	142	GO:0008284	regulation
positive regulation of T cell mediated immunity	62	2000	GO:BP	2.41283e-05	21	1	-1	GO:0002711	regulation
mitotic sister chromatid separation	62	2000	GO:BP	2.41283e-05	21	4.35127e-06	22	GO:0051306	other
positive regulation of leukocyte proliferation	149	2000	GO:BP	2.58049e-05	35	2.25129e-06	37	GO:0070665	regulation
immune response-activating cell surface receptor signaling pathway	282	2000	GO:BP	2.67425e-05	53	0.0373326	45	GO:0002429	response
multicellular organism development	4277	2000	GO:BP	2.6857e-05	447	4.08797e-24	542	GO:0007275	other
cellular response to lipid	567	2000	GO:BP	2.75724e-05	87	1.78591e-06	91	GO:0071396	response
natural killer cell mediated cytotoxicity	68	2000	GO:BP	2.84675e-05	22	1	-1	GO:0042267	other
spindle checkpoint signaling	47	2000	GO:BP	2.93526e-05	18	0.000213426	17	GO:0031577	other
anatomical structure development	5420	2000	GO:BP	3.01696e-05	549	1.27611e-26	662	GO:0048856	other
negative regulation of leukocyte activation	178	2000	GO:BP	3.0997e-05	39	0.00296747	35	GO:0002695	regulation
regulation of leukocyte chemotaxis	117	2000	GO:BP	3.33241e-05	30	1	-1	GO:0002688	regulation
cell cycle checkpoint signaling	193	2000	GO:BP	3.41109e-05	41	1.28504e-05	42	GO:0000075	other
inorganic ion homeostasis	500	2000	GO:BP	3.54416e-05	79	0.00686372	72	GO:0098771	other
regulation of T cell differentiation	172	2000	GO:BP	3.72919e-05	38	3.87378e-06	40	GO:0045580	regulation
T-helper cell differentiation	69	2000	GO:BP	3.85509e-05	22	7.64586e-06	23	GO:0042093	other
attachment of spindle microtubules to kinetochore	53	2000	GO:BP	4.15934e-05	19	0.0385427	15	GO:0008608	other
negative regulation of mitotic sister chromatid segregation	48	2000	GO:BP	4.33481e-05	18	4.65695e-05	18	GO:0033048	regulation
negative regulation of sister chromatid segregation	48	2000	GO:BP	4.33481e-05	18	4.65695e-05	18	GO:0033046	regulation
negative regulation of mitotic metaphase/anaphase transition	48	2000	GO:BP	4.33481e-05	18	4.65695e-05	18	GO:0045841	regulation
negative regulation of mitotic sister chromatid separation	48	2000	GO:BP	4.33481e-05	18	4.65695e-05	18	GO:2000816	regulation
positive regulation of protein phosphorylation	538	2000	GO:BP	4.64983e-05	83	0.0142613	75	GO:0001934	regulation
negative regulation of T cell activation	119	2000	GO:BP	5.07663e-05	30	0.00890092	26	GO:0050868	regulation
positive regulation of leukocyte migration	146	2000	GO:BP	5.2367e-05	34	0.00212574	31	GO:0002687	regulation
metaphase chromosome alignment	100	2000	GO:BP	5.31806e-05	27	1.37145e-05	28	GO:0051310	other
cell cycle phase transition	514	2000	GO:BP	5.65205e-05	80	2.03346e-08	90	GO:0044770	other
cell differentiation	4004	2000	GO:BP	5.67474e-05	420	1.62084e-18	493	GO:0030154	other
cellular developmental process	4005	2000	GO:BP	5.84951e-05	420	1.71017e-18	493	GO:0048869	other
regulation of mitotic sister chromatid segregation	54	2000	GO:BP	5.9222e-05	19	6.38991e-05	19	GO:0033047	regulation
positive regulation of natural killer cell mediated immunity	30	2000	GO:BP	6.0086e-05	14	1	-1	GO:0002717	regulation
negative regulation of chromosome segregation	49	2000	GO:BP	6.32435e-05	18	6.7901e-05	18	GO:0051985	regulation
negative regulation of chromosome separation	49	2000	GO:BP	6.32435e-05	18	6.7901e-05	18	GO:1905819	regulation
negative regulation of metaphase/anaphase transition of cell cycle	49	2000	GO:BP	6.32435e-05	18	6.7901e-05	18	GO:1902100	regulation
monoatomic cation homeostasis	560	2000	GO:BP	6.6917e-05	85	0.00141724	81	GO:0055080	other
CD4-positive, alpha-beta T cell differentiation involved in immune response	71	2000	GO:BP	6.93176e-05	22	1.4309e-05	23	GO:0002294	response
developmental process	5882	2000	GO:BP	6.96829e-05	587	9.81539e-28	710	GO:0032502	other
cell motility	1598	2000	GO:BP	7.18166e-05	193	1.00473e-09	215	GO:0048870	other
tumor necrosis factor production	155	2000	GO:BP	7.55629e-05	35	2.56103e-05	36	GO:0032640	other
regulation of tumor necrosis factor production	155	2000	GO:BP	7.55629e-05	35	2.56103e-05	36	GO:0032680	regulation
pyroptosis	35	2000	GO:BP	7.95803e-05	15	0.0310984	12	GO:0070269	other
regulation of chromosome segregation	128	2000	GO:BP	8.18427e-05	31	6.39334e-06	33	GO:0051983	regulation
T-helper 1 type immune response	50	2000	GO:BP	9.12131e-05	18	0.000602384	17	GO:0042088	response
negative regulation of signal transduction	1214	2000	GO:BP	9.16835e-05	154	1.35043e-10	177	GO:0009968	regulation
alpha-beta T cell activation involved in immune response	72	2000	GO:BP	9.20791e-05	22	1.93793e-05	23	GO:0002287	response
alpha-beta T cell differentiation involved in immune response	72	2000	GO:BP	9.20791e-05	22	1.93793e-05	23	GO:0002293	response
regulation of T cell mediated cytotoxicity	45	2000	GO:BP	9.4486e-05	17	1	-1	GO:0001914	regulation
negative regulation of cell activation	200	2000	GO:BP	9.84828e-05	41	3.86178e-05	42	GO:0050866	regulation
DNA-templated DNA replication	157	2000	GO:BP	0.000106475	35	2.07127e-07	40	GO:0006261	other
positive regulation of cell differentiation	813	2000	GO:BP	0.000107338	112	8.90187e-12	135	GO:0045597	regulation
regulation of nitric-oxide synthase biosynthetic process	19	2000	GO:BP	0.000107867	11	1	-1	GO:0051769	regulation
nitric-oxide synthase biosynthetic process	19	2000	GO:BP	0.000107867	11	1	-1	GO:0051767	other
monoatomic ion homeostasis	568	2000	GO:BP	0.000127764	85	0.00251915	81	GO:0050801	other
negative regulation of lymphocyte activation	152	2000	GO:BP	0.000150947	34	0.0151459	30	GO:0051250	regulation
negative regulation of mitotic cell cycle	226	2000	GO:BP	0.000157863	44	7.77586e-08	51	GO:0045930	regulation
positive regulation of nitric-oxide synthase biosynthetic process	16	2000	GO:BP	0.000163308	10	1	-1	GO:0051770	regulation
regulation of T-helper 1 type immune response	32	2000	GO:BP	0.000166293	14	0.000174698	14	GO:0002825	regulation & response
T cell mediated cytotoxicity	52	2000	GO:BP	0.0001837	18	1	-1	GO:0001913	other
negative regulation of nuclear division	63	2000	GO:BP	0.000185552	20	6.16302e-06	22	GO:0051784	regulation
mitotic spindle midzone assembly	10	2000	GO:BP	0.000185906	8	1	-1	GO:0051256	other
negative regulation of mitotic cell cycle phase transition	175	2000	GO:BP	0.000192361	37	1.9238e-06	41	GO:1901991	regulation
spindle elongation	13	2000	GO:BP	0.000207853	9	1	-1	GO:0051231	other
establishment of chromosome localization	113	2000	GO:BP	0.000219743	28	6.36213e-05	29	GO:0051303	other
negative regulation of immune effector process	113	2000	GO:BP	0.000219743	28	0.0341275	24	GO:0002698	regulation
calcium ion homeostasis	309	2000	GO:BP	0.000248726	54	1	-1	GO:0055074	other
positive regulation of apoptotic process	479	2000	GO:BP	0.000254638	74	1.49709e-05	78	GO:0043065	regulation
negative regulation of leukocyte apoptotic process	53	2000	GO:BP	0.000256783	18	1	-1	GO:2000107	regulation
positive regulation of transport	799	2000	GO:BP	0.000269722	109	0.00213781	106	GO:0051050	regulation
lymphocyte apoptotic process	76	2000	GO:BP	0.000270543	22	1	-1	GO:0070227	other
establishment of localization	4358	2000	GO:BP	0.00028034	447	9.14266e-07	467	GO:0051234	other
chromosome localization	121	2000	GO:BP	0.00028468	29	8.64588e-05	30	GO:0050000	other
positive regulation of T cell proliferation	95	2000	GO:BP	0.000300796	25	0.00132352	24	GO:0042102	regulation
cytoplasmic pattern recognition receptor signaling pathway	142	2000	GO:BP	0.000303007	32	0.0035271	30	GO:0002753	other
positive regulation of cell development	421	2000	GO:BP	0.000327577	67	1.9386e-07	76	GO:0010720	regulation
positive regulation of phosphorylation	563	2000	GO:BP	0.000351788	83	0.039169	76	GO:0042327	regulation
regulation of transport	1512	2000	GO:BP	0.000368569	181	1.61809e-06	193	GO:0051049	regulation
regulation of protein phosphorylation	833	2000	GO:BP	0.000384984	112	2.59971e-05	117	GO:0001932	regulation
meiotic cell cycle process	210	2000	GO:BP	0.000402261	41	0.0088191	38	GO:1903046	other
negative regulation of chromosome organization	90	2000	GO:BP	0.000406845	24	4.84167e-06	27	GO:2001251	regulation
antigen processing and presentation of endogenous peptide antigen via MHC class I	21	2000	GO:BP	0.000430822	11	1	-1	GO:0019885	other
DNA unwinding involved in DNA replication	21	2000	GO:BP	0.000430822	11	0.0471384	9	GO:0006268	other
regulation of chemotaxis	211	2000	GO:BP	0.000460044	41	7.29414e-06	45	GO:0050920	regulation
meiotic cell cycle	274	2000	GO:BP	0.000462936	49	0.00136499	48	GO:0051321	other
negative regulation of cell-cell adhesion	181	2000	GO:BP	0.000474861	37	0.00443716	35	GO:0022408	regulation
positive regulation of protein modification process	715	2000	GO:BP	0.00050981	99	0.000689725	99	GO:0031401	regulation
regulation of interleukin-1 production	104	2000	GO:BP	0.000515832	26	1	-1	GO:0032652	regulation
interleukin-1 production	104	2000	GO:BP	0.000515832	26	1	-1	GO:0032612	other
DNA replication	268	2000	GO:BP	0.000585682	48	2.12792e-09	60	GO:0006260	other
myeloid leukocyte differentiation	221	2000	GO:BP	0.000620211	42	0.000724972	42	GO:0002573	other
mitotic spindle elongation	11	2000	GO:BP	0.000631957	8	1	-1	GO:0000022	other
defense response to bacterium	261	2000	GO:BP	0.000659919	47	1	-1	GO:0042742	response
negative regulation of mitotic nuclear division	56	2000	GO:BP	0.000663792	18	2.06161e-05	20	GO:0045839	regulation
chemical homeostasis	958	2000	GO:BP	0.000688416	124	0.0205769	118	GO:0048878	other
defense response to protozoan	26	2000	GO:BP	0.000703848	12	1	-1	GO:0042832	response
protection from natural killer cell mediated cytotoxicity	6	2000	GO:BP	0.000710866	6	1	-1	GO:0042270	other
lipid localization	465	2000	GO:BP	0.000722998	71	1	-1	GO:0010876	other
negative regulation of leukocyte mediated immunity	62	2000	GO:BP	0.000726987	19	1	-1	GO:0002704	regulation
negative regulation of cell development	262	2000	GO:BP	0.00074088	47	2.27419e-06	53	GO:0010721	regulation
adenylate cyclase-modulating G protein-coupled receptor signaling pathway	223	2000	GO:BP	0.000800117	42	0.000124693	44	GO:0007188	other
myeloid cell differentiation	398	2000	GO:BP	0.00092759	63	3.39368e-06	70	GO:0030099	other
regulation of phosphorylation	886	2000	GO:BP	0.000931578	116	7.351e-05	121	GO:0042325	regulation
localization	4942	2000	GO:BP	0.00094187	495	9.01445e-09	533	GO:0051179	other
regulation of molecular function	1679	2000	GO:BP	0.0010332	195	7.08486e-06	207	GO:0065009	regulation
positive regulation of phosphate metabolic process	633	2000	GO:BP	0.00106731	89	0.0156936	85	GO:0045937	metabolic & regulation
positive regulation of phosphorus metabolic process	633	2000	GO:BP	0.00106731	89	0.0156936	85	GO:0010562	metabolic & regulation
negative regulation of lymphocyte mediated immunity	52	2000	GO:BP	0.0010754	17	1	-1	GO:0002707	regulation
mitotic cell cycle checkpoint signaling	143	2000	GO:BP	0.00117533	31	3.45599e-05	34	GO:0007093	other
adenylate cyclase-activating G protein-coupled receptor signaling pathway	143	2000	GO:BP	0.00117533	31	0.000407676	32	GO:0007189	other
microtubule cytoskeleton organization involved in mitosis	158	2000	GO:BP	0.00126523	33	0.000463845	34	GO:1902850	other
positive regulation of cell cycle process	243	2000	GO:BP	0.00133307	44	0.000607547	45	GO:0090068	regulation
positive regulation of hemopoiesis	174	2000	GO:BP	0.00149601	35	1	-1	GO:1903708	regulation
positive regulation of leukocyte differentiation	174	2000	GO:BP	0.00149601	35	1	-1	GO:1902107	regulation
canonical NF-kappaB signal transduction	285	2000	GO:BP	0.00155897	49	2.94114e-07	58	GO:0007249	other
monocarboxylic acid transport	167	2000	GO:BP	0.00160433	34	1	-1	GO:0015718	other
negative regulation of cell population proliferation	658	2000	GO:BP	0.00164817	91	2.21203e-05	98	GO:0008285	regulation
mitotic cell cycle phase transition	415	2000	GO:BP	0.00191524	64	1.40549e-08	78	GO:0044772	other
negative regulation of leukocyte differentiation	104	2000	GO:BP	0.00193902	25	1	-1	GO:1902106	regulation
negative regulation of cell communication	1316	2000	GO:BP	0.00197643	158	5.4946e-10	186	GO:0010648	regulation
regulation of response to cytokine stimulus	161	2000	GO:BP	0.00198168	33	0.00074226	34	GO:0060759	regulation & response
regulation of mitotic cell cycle phase transition	321	2000	GO:BP	0.0020426	53	8.30927e-08	64	GO:1901990	regulation
positive regulation of defense response to virus by host	33	2000	GO:BP	0.00212344	13	1	-1	GO:0002230	regulation & response
negative regulation of signaling	1318	2000	GO:BP	0.00216474	158	6.32112e-10	186	GO:0023057	regulation
regulation of canonical NF-kappaB signal transduction	256	2000	GO:BP	0.00234207	45	8.06976e-06	51	GO:0043122	regulation
transmembrane transport	1401	2000	GO:BP	0.00234407	166	1	-1	GO:0055085	other
cell-cell signaling	1565	2000	GO:BP	0.00235864	182	8.13351e-09	208	GO:0007267	other
cytokine production involved in immune response	112	2000	GO:BP	0.00241888	26	0.00074823	27	GO:0002367	response
regulation of cytokine production involved in immune response	112	2000	GO:BP	0.00241888	26	0.00074823	27	GO:0002718	regulation & response
innate immune response activating cell surface receptor signaling pathway	79	2000	GO:BP	0.00248509	21	1	-1	GO:0002220	response
cell division	618	2000	GO:BP	0.00255801	86	0.0017733	87	GO:0051301	other
positive regulation of cell cycle	315	2000	GO:BP	0.00259328	52	0.000575356	54	GO:0045787	regulation
secretion	905	2000	GO:BP	0.00271486	116	0.00128115	118	GO:0046903	other
regulation of defense response to virus by host	44	2000	GO:BP	0.00276033	15	1	-1	GO:0050691	regulation & response
meiosis I cell cycle process	134	2000	GO:BP	0.00280511	29	1	-1	GO:0061982	other
response to protozoan	29	2000	GO:BP	0.00299176	12	1	-1	GO:0001562	response
regulation of T-helper cell differentiation	39	2000	GO:BP	0.00306209	14	6.29474e-05	16	GO:0045622	regulation
regulation of CD4-positive, alpha-beta T cell differentiation	50	2000	GO:BP	0.00322375	16	9.78692e-05	18	GO:0043370	regulation
cell surface toll-like receptor signaling pathway	56	2000	GO:BP	0.0034921	17	1	-1	GO:0140895	other
positive regulation of natural killer cell mediated cytotoxicity	25	2000	GO:BP	0.00399033	11	1	-1	GO:0045954	regulation
regulation of cytokine-mediated signaling pathway	151	2000	GO:BP	0.00405233	31	0.00453135	31	GO:0001959	regulation
spindle midzone assembly	13	2000	GO:BP	0.00423765	8	1	-1	GO:0051255	other
interleukin-1 beta production	88	2000	GO:BP	0.00429464	22	1	-1	GO:0032611	other
regulation of interleukin-1 beta production	88	2000	GO:BP	0.00429464	22	1	-1	GO:0032651	regulation
receptor signaling pathway via STAT	144	2000	GO:BP	0.00429655	30	0.0403522	28	GO:0097696	other
meiotic nuclear division	190	2000	GO:BP	0.00461569	36	1	-1	GO:0140013	other
cell surface pattern recognition receptor signaling pathway	63	2000	GO:BP	0.00462755	18	1	-1	GO:0002752	other
DNA replication initiation	35	2000	GO:BP	0.00467508	13	9.29179e-07	17	GO:0006270	other
regulatory T cell differentiation	35	2000	GO:BP	0.00467508	13	1	-1	GO:0045066	other
negative regulation of hemopoiesis	109	2000	GO:BP	0.00489939	25	1	-1	GO:1903707	regulation
export from cell	848	2000	GO:BP	0.00499659	109	0.0312095	106	GO:0140352	other
lipid transport	418	2000	GO:BP	0.0051115	63	1	-1	GO:0006869	other
negative regulation of natural killer cell mediated cytotoxicity	17	2000	GO:BP	0.00520493	9	1	-1	GO:0045953	regulation
receptor signaling pathway via JAK-STAT	138	2000	GO:BP	0.00527195	29	1	-1	GO:0007259	other
regulation of pattern recognition receptor signaling pathway	138	2000	GO:BP	0.00527195	29	0.0175216	28	GO:0062207	regulation
DNA duplex unwinding	76	2000	GO:BP	0.0052834	20	1	-1	GO:0032508	other
negative regulation of programmed cell death	830	2000	GO:BP	0.00540597	107	1.93549e-07	124	GO:0043069	regulation
regulation of meiotic cell cycle phase transition	10	2000	GO:BP	0.00561035	7	0.00564516	7	GO:1901993	regulation
regulation of apoptotic cell clearance	10	2000	GO:BP	0.00561035	7	1	-1	GO:2000425	regulation
regulation of mitotic metaphase/anaphase transition	90	2000	GO:BP	0.00642902	22	0.000446844	24	GO:0030071	regulation
negative regulation of apoptotic process	805	2000	GO:BP	0.0067893	104	9.07162e-07	119	GO:0043066	regulation
regulation of regulatory T cell differentiation	31	2000	GO:BP	0.00695993	12	1	-1	GO:0045589	regulation
protein phosphorylation	1233	2000	GO:BP	0.0071029	147	4.95502e-08	170	GO:0006468	other
regulation of CD4-positive, alpha-beta T cell activation	71	2000	GO:BP	0.00716233	19	0.000376879	21	GO:2000514	regulation
interferon-mediated signaling pathway	84	2000	GO:BP	0.00730643	21	1	-1	GO:0140888	other
monoatomic ion transport	1143	2000	GO:BP	0.00740814	138	1	-1	GO:0006811	other
tyrosine phosphorylation of STAT protein	65	2000	GO:BP	0.00759145	18	1	-1	GO:0007260	other
regulation of interleukin-12 production	59	2000	GO:BP	0.00778943	17	1	-1	GO:0032655	regulation
interleukin-12 production	59	2000	GO:BP	0.00778943	17	1	-1	GO:0032615	other
regulation of myeloid leukocyte differentiation	119	2000	GO:BP	0.00812129	26	1	-1	GO:0002761	regulation
macrophage activation	105	2000	GO:BP	0.00828582	24	0.00901527	24	GO:0042116	other
antigen processing and presentation via MHC class Ib	22	2000	GO:BP	0.00830231	10	1	-1	GO:0002475	other
intracellular monoatomic ion homeostasis	497	2000	GO:BP	0.0085854	71	1	-1	GO:0006873	other
regulation of type III interferon production	5	2000	GO:BP	0.008638	5	1	-1	GO:0034344	regulation
type III interferon production	5	2000	GO:BP	0.008638	5	1	-1	GO:0034343	other
intracellular monoatomic cation homeostasis	488	2000	GO:BP	0.00867563	70	1	-1	GO:0030003	other
negative regulation of leukocyte proliferation	92	2000	GO:BP	0.00948917	22	1	-1	GO:0070664	regulation
regulation of metaphase/anaphase transition of cell cycle	92	2000	GO:BP	0.00948917	22	0.000697689	24	GO:1902099	regulation
toll-like receptor 4 signaling pathway	48	2000	GO:BP	0.0095673	15	1	-1	GO:0034142	other
negative regulation of natural killer cell mediated immunity	18	2000	GO:BP	0.00964522	9	1	-1	GO:0002716	regulation
positive regulation of tumor necrosis factor superfamily cytokine production	99	2000	GO:BP	0.00978974	23	0.000783841	25	GO:1903557	regulation
negative regulation of viral life cycle	27	2000	GO:BP	0.0099952	11	1	-1	GO:1903901	regulation
humoral immune response mediated by circulating immunoglobulin	54	2000	GO:BP	0.0100572	16	1	-1	GO:0002455	response
positive regulation of cytokine production involved in immune response	79	2000	GO:BP	0.0101075	20	0.00268269	21	GO:0002720	regulation & response
negative regulation of interleukin-1 production	32	2000	GO:BP	0.0103006	12	1	-1	GO:0032692	regulation
intracellular calcium ion homeostasis	287	2000	GO:BP	0.0103973	47	1	-1	GO:0006874	other
system process	1729	2000	GO:BP	0.0109319	194	0.00352205	198	GO:0003008	other
negative regulation of cell adhesion	271	2000	GO:BP	0.0113303	45	0.00567213	46	GO:0007162	regulation
monoatomic ion transmembrane transport	923	2000	GO:BP	0.0117407	115	1	-1	GO:0034220	other
mitotic spindle assembly	67	2000	GO:BP	0.0121699	18	1	-1	GO:0090307	other
phosphorylation	1451	2000	GO:BP	0.0123787	167	4.93379e-08	193	GO:0016310	other
regulation of cell migration	885	2000	GO:BP	0.0126554	111	1.30084e-11	143	GO:0030334	regulation
cellular defense response	49	2000	GO:BP	0.0127411	15	1	-1	GO:0006968	response
complement activation	61	2000	GO:BP	0.0128537	17	1	-1	GO:0006956	other
interleukin-10 production	55	2000	GO:BP	0.0131028	16	1	-1	GO:0032613	other
regulation of lymphocyte apoptotic process	55	2000	GO:BP	0.0131028	16	1	-1	GO:0070228	regulation
regulation of interleukin-10 production	55	2000	GO:BP	0.0131028	16	1	-1	GO:0032653	regulation
negative regulation of leukocyte mediated cytotoxicity	23	2000	GO:BP	0.0136012	10	1	-1	GO:0001911	regulation
metaphase/anaphase transition of mitotic cell cycle	94	2000	GO:BP	0.0138192	22	0.00107303	24	GO:0007091	other
tolerance induction	28	2000	GO:BP	0.0152357	11	1	-1	GO:0002507	other
prostaglandin transport	28	2000	GO:BP	0.0152357	11	1	-1	GO:0015732	other
DNA geometric change	81	2000	GO:BP	0.0152487	20	1	-1	GO:0032392	other
organic anion transport	414	2000	GO:BP	0.0153044	61	1	-1	GO:0015711	other
blood circulation	479	2000	GO:BP	0.0169057	68	1	-1	GO:0008015	other
T cell apoptotic process	56	2000	GO:BP	0.0169471	16	1	-1	GO:0070231	other
regulation of glial cell migration	19	2000	GO:BP	0.016981	9	0.00153222	10	GO:1903975	regulation
microglial cell migration	8	2000	GO:BP	0.0171985	6	0.0171864	6	GO:1904124	other
positive regulation of apoptotic cell clearance	8	2000	GO:BP	0.0171985	6	1	-1	GO:2000427	regulation
regulation of microglial cell migration	8	2000	GO:BP	0.0171985	6	0.0171864	6	GO:1904139	regulation
mitotic spindle organization	124	2000	GO:BP	0.0179795	26	0.000559452	29	GO:0007052	other
dendritic cell antigen processing and presentation	15	2000	GO:BP	0.0182211	8	1	-1	GO:0002468	other
signal release	462	2000	GO:BP	0.0185982	66	1	-1	GO:0023061	other
positive regulation of peptidyl-tyrosine phosphorylation	147	2000	GO:BP	0.0195649	29	0.0215833	29	GO:0050731	regulation
regulation of sister chromatid segregation	103	2000	GO:BP	0.0198386	23	0.00175371	25	GO:0033045	regulation
metaphase/anaphase transition of cell cycle	96	2000	GO:BP	0.0198697	22	0.00162678	24	GO:0044784	other
positive regulation of tumor necrosis factor production	96	2000	GO:BP	0.0198697	22	0.00606334	23	GO:0032760	regulation
regulation of localization	1916	2000	GO:BP	0.0206868	210	3.62837e-05	227	GO:0032879	regulation
regulation of tyrosine phosphorylation of STAT protein	63	2000	GO:BP	0.020692	17	1	-1	GO:0042509	regulation
regulation of defense response to virus	63	2000	GO:BP	0.020692	17	1	-1	GO:0050688	regulation & response
carboxylic acid transport	329	2000	GO:BP	0.0207345	51	1	-1	GO:0046942	other
regulation of biological quality	2640	2000	GO:BP	0.0223671	277	0.000109366	294	GO:0065008	regulation
organic acid transport	330	2000	GO:BP	0.0225958	51	1	-1	GO:0015849	other
intracellular receptor signaling pathway	330	2000	GO:BP	0.0225958	51	0.0002079	57	GO:0030522	other
response to type I interferon	70	2000	GO:BP	0.0237384	18	1	-1	GO:0034340	response
regulation of phosphate metabolic process	1039	2000	GO:BP	0.0255569	125	0.00116853	132	GO:0019220	metabolic & regulation
regulation of phosphorus metabolic process	1040	2000	GO:BP	0.0267511	125	0.00123183	132	GO:0051174	metabolic & regulation
circulatory system process	561	2000	GO:BP	0.0279344	76	1	-1	GO:0003013	other
regulation of antigen processing and presentation	20	2000	GO:BP	0.0286105	9	1	-1	GO:0002577	regulation
regulation of protein modification process	1134	2000	GO:BP	0.0303463	134	1.37974e-06	154	GO:0031399	regulation
spindle organization	190	2000	GO:BP	0.0316358	34	0.000233785	39	GO:0007051	other
double-strand break repair via break-induced replication	12	2000	GO:BP	0.0319132	7	1	-1	GO:0000727	other
response to interleukin-18	12	2000	GO:BP	0.0319132	7	1	-1	GO:0070673	response
secretion by cell	785	2000	GO:BP	0.0321736	99	1	-1	GO:0032940	other
positive regulation of chromosome separation	30	2000	GO:BP	0.0332007	11	1	-1	GO:1905820	regulation
mitotic DNA replication	16	2000	GO:BP	0.0337985	8	1	-1	GO:1902969	other
antigen processing and presentation of peptide antigen via MHC class Ib	16	2000	GO:BP	0.0337985	8	1	-1	GO:0002428	other
positive regulation of lymphocyte apoptotic process	16	2000	GO:BP	0.0337985	8	1	-1	GO:0070230	regulation
negative regulation of cytokine-mediated signaling pathway	72	2000	GO:BP	0.0361631	18	0.0382769	18	GO:0001960	regulation
negative regulation of adaptive immune response based on somatic recombination of immune receptors built from immunoglobulin superfamily domains	53	2000	GO:BP	0.0368659	15	1	-1	GO:0002823	regulation & response
positive regulation of tyrosine phosphorylation of STAT protein	53	2000	GO:BP	0.0368659	15	1	-1	GO:0042531	regulation
lipid export from cell	47	2000	GO:BP	0.0369604	14	1	-1	GO:0140353	other
regulation of locomotion	978	2000	GO:BP	0.0394624	118	2.32477e-11	153	GO:0040012	regulation
regulation of cell motility	938	2000	GO:BP	0.0397241	114	1.48174e-10	146	GO:2000145	regulation
icosanoid transport	60	2000	GO:BP	0.0443602	16	1	-1	GO:0071715	other
negative regulation of viral entry into host cell	21	2000	GO:BP	0.0464002	9	1	-1	GO:0046597	regulation
response to interferon-beta	31	2000	GO:BP	0.047633	11	1	-1	GO:0035456	response
regulation of chronic inflammatory response	9	2000	GO:BP	0.0479689	6	1	-1	GO:0002676	regulation & response
negative regulation of leukocyte migration	48	2000	GO:BP	0.0482399	14	1	-1	GO:0002686	regulation
G2/MI transition of meiotic cell cycle	6	2000	GO:BP	0.0482737	5	1	-1	GO:0008315	other
cytolysis in another organism	6	2000	GO:BP	0.0482737	5	1	-1	GO:0051715	other
negative regulation of meiotic cell cycle phase transition	6	2000	GO:BP	0.0482737	5	0.0479078	5	GO:1901994	regulation
regulation of peptidyl-tyrosine phosphorylation	202	2000	GO:BP	0.0487846	35	1	-1	GO:0050730	regulation
regulation of myeloid cell differentiation	194	2000	GO:BP	0.0497349	34	1	-1	GO:0045637	regulation
plasma membrane	4847	2000	GO:CC	5.44413e-25	594	2.74555e-16	560	GO:0005886	other
cell periphery	5298	2000	GO:CC	4.63456e-24	633	1.14077e-14	594	GO:0071944	other
cell surface	833	2000	GO:CC	2.80526e-20	156	5.8106e-07	120	GO:0009986	other
MHC protein complex	22	2000	GO:CC	1.08334e-19	21	1	-1	GO:0042611	other
external side of plasma membrane	353	2000	GO:CC	1.47483e-19	89	0.0253775	51	GO:0009897	other
side of membrane	666	2000	GO:CC	2.50957e-17	128	0.00555693	87	GO:0098552	other
MHC class II protein complex	15	2000	GO:CC	1.77987e-14	15	1	-1	GO:0042613	other
membrane	8503	2000	GO:CC	1.62681e-11	856	1.59275e-14	880	GO:0016020	other
lumenal side of endoplasmic reticulum membrane	24	2000	GO:CC	5.64892e-10	16	1	-1	GO:0098553	other
lumenal side of membrane	34	2000	GO:CC	7.61266e-07	16	1	-1	GO:0098576	other
outer kinetochore	20	2000	GO:CC	2.16882e-06	12	0.000440634	10	GO:0000940	other
extracellular region	3762	2000	GO:CC	4.13765e-06	400	1	-1	GO:0005576	other
cellular anatomical entity	16218	2000	GO:CC	2.35441e-05	1443	1.82357e-54	1654	GO:0110165	other
cellular_component	16345	2000	GO:CC	5.38215e-05	1450	2.70416e-55	1665	GO:0005575	other
MHC class I protein complex	8	2000	GO:CC	6.41009e-05	7	1	-1	GO:0042612	other
endocytic vesicle	326	2000	GO:CC	9.27871e-05	55	1	-1	GO:0030139	other
CMG complex	11	2000	GO:CC	9.3309e-05	8	0.00223831	7	GO:0071162	other
MCM complex	11	2000	GO:CC	9.3309e-05	8	1	-1	GO:0042555	other
extracellular space	2990	2000	GO:CC	9.40477e-05	320	1	-1	GO:0005615	other
endocytic vesicle membrane	187	2000	GO:CC	0.000461721	36	1	-1	GO:0030666	other
DNA replication preinitiation complex	13	2000	GO:CC	0.000625693	8	0.0100218	7	GO:0031261	other
transport vesicle membrane	222	2000	GO:CC	0.000714333	40	1	-1	GO:0030658	other
plasma membrane region	1189	2000	GO:CC	0.000893729	143	0.000125829	148	GO:0098590	other
plasma membrane protein complex	598	2000	GO:CC	0.00118981	82	1	-1	GO:0098797	other
other organism part	5	2000	GO:CC	0.00127541	5	1	-1	GO:0044217	other
ER to Golgi transport vesicle membrane	57	2000	GO:CC	0.00321395	16	1	-1	GO:0012507	other
chromosomal region	370	2000	GO:CC	0.00486078	55	1.33275e-07	68	GO:0098687	other
chromosome, centromeric region	232	2000	GO:CC	0.00519709	39	6.34811e-05	44	GO:0000775	other
condensed chromosome, centromeric region	171	2000	GO:CC	0.00844073	31	0.000498544	34	GO:0000779	other
cytoplasmic vesicle membrane	1162	2000	GO:CC	0.00948412	135	1	-1	GO:0030659	other
condensed chromosome	264	2000	GO:CC	0.00978583	42	6.81681e-05	48	GO:0000793	other
vesicle	3746	2000	GO:CC	0.010075	373	0.00401828	379	GO:0031982	other
late endosome membrane	165	2000	GO:CC	0.0106842	30	1	-1	GO:0031902	other
vesicle membrane	1174	2000	GO:CC	0.015397	135	1	-1	GO:0012506	other
Ndc80 complex	4	2000	GO:CC	0.0154909	4	1	-1	GO:0031262	other
symbiont cell surface	4	2000	GO:CC	0.0154909	4	1	-1	GO:0106139	other
late endosome	296	2000	GO:CC	0.0162433	45	1	-1	GO:0005770	other
cytoplasmic vesicle	2369	2000	GO:CC	0.0162837	247	0.0267527	247	GO:0031410	other
kinetochore	161	2000	GO:CC	0.0171389	29	0.00282777	31	GO:0000776	other
intracellular vesicle	2374	2000	GO:CC	0.0187142	247	0.0306383	247	GO:0097708	other
transport vesicle	404	2000	GO:CC	0.0296887	56	0.0101948	58	GO:0030133	other
clathrin-coated endocytic vesicle membrane	68	2000	GO:CC	0.0342164	16	1	-1	GO:0030669	other
chromosome	1711	2000	GO:CC	0.0451449	183	3.28268e-20	260	GO:0005694	other
signaling receptor activity	982	2000	GO:MF	1.39131e-23	183	1.32089e-08	143	GO:0038023	other
molecular transducer activity	982	2000	GO:MF	1.39131e-23	183	1.32089e-08	143	GO:0060089	other
cytokine activity	185	2000	GO:MF	7.51073e-20	62	3.31073e-06	41	GO:0005125	other
transmembrane signaling receptor activity	775	2000	GO:MF	1.00226e-19	148	0.000263855	105	GO:0004888	other
cytokine receptor binding	220	2000	GO:MF	6.12122e-19	67	7.6165e-13	58	GO:0005126	other
chemokine activity	44	2000	GO:MF	2.72425e-17	28	0.000866772	15	GO:0008009	other
chemokine receptor binding	59	2000	GO:MF	5.60681e-17	32	1.71747e-05	20	GO:0042379	other
signaling receptor regulator activity	449	2000	GO:MF	1.52878e-15	96	1.44638e-05	73	GO:0030545	other
signaling receptor activator activity	418	2000	GO:MF	3.5339e-14	89	4.25136e-05	68	GO:0030546	other
receptor ligand activity	412	2000	GO:MF	4.31924e-14	88	2.39329e-05	68	GO:0048018	other
signaling receptor binding	1341	2000	GO:MF	2.77733e-13	197	1.11656e-07	178	GO:0005102	other
peptide antigen binding	38	2000	GO:MF	3.06696e-13	23	1	-1	GO:0042605	other
CCR chemokine receptor binding	37	2000	GO:MF	3.5435e-11	21	1	-1	GO:0048020	other
immune receptor activity	126	2000	GO:MF	2.61567e-09	37	1	-1	GO:0140375	other
G protein-coupled receptor binding	250	2000	GO:MF	8.47989e-08	53	1	-1	GO:0001664	other
molecular function activator activity	982	2000	GO:MF	2.08651e-07	138	0.000634188	125	GO:0140677	other
MHC class II protein complex binding	24	2000	GO:MF	3.62973e-07	14	1	-1	GO:0023026	other
MHC class II receptor activity	8	2000	GO:MF	1.33885e-06	8	1	-1	GO:0032395	other
single-stranded DNA helicase activity	23	2000	GO:MF	2.59282e-06	13	1	-1	GO:0017116	other
G protein-coupled receptor activity	378	2000	GO:MF	2.89475e-06	66	0.0108009	56	GO:0004930	other
MHC protein complex binding	32	2000	GO:MF	4.89883e-06	15	1	-1	GO:0023023	other
molecular function regulator activity	1846	2000	GO:MF	1.49534e-05	218	0.000155549	214	GO:0098772	other
TAP binding	7	2000	GO:MF	1.62839e-05	7	1	-1	GO:0046977	other
molecular_function	16152	2000	GO:MF	1.803e-05	1441	1.41875e-55	1653	GO:0003674	other
antigen binding	133	2000	GO:MF	5.8527e-05	31	1	-1	GO:0003823	other
peptide binding	299	2000	GO:MF	0.000138453	52	1	-1	GO:0042277	other
binding	15145	2000	GO:MF	0.000266109	1351	1.29648e-52	1573	GO:0005488	other
protein binding	13515	2000	GO:MF	0.00100612	1214	6.20866e-42	1417	GO:0005515	other
amide binding	370	2000	GO:MF	0.00101023	58	1	-1	GO:0033218	other
carbohydrate derivative binding	2136	2000	GO:MF	0.00120976	235	1.29546e-08	263	GO:0097367	other
pattern recognition receptor activity	31	2000	GO:MF	0.00193821	12	1	-1	GO:0038187	other
phosphatidylserine binding	59	2000	GO:MF	0.00216921	17	0.0456569	15	GO:0001786	other
cytokine receptor activity	85	2000	GO:MF	0.00249403	21	1	-1	GO:0004896	other
identical protein binding	2032	2000	GO:MF	0.00271274	223	2.23841e-09	256	GO:0042802	other
transporter activity	1134	2000	GO:MF	0.0034404	136	1	-1	GO:0005215	other
transmembrane transporter activity	1025	2000	GO:MF	0.0059349	124	1	-1	GO:0022857	other
DNA helicase activity	57	2000	GO:MF	0.00606176	16	1	-1	GO:0003678	other
CXCR chemokine receptor binding	16	2000	GO:MF	0.00941225	8	1	-1	GO:0045236	other
lipid binding	796	2000	GO:MF	0.00952647	100	1	-1	GO:0008289	other
anion binding	2276	2000	GO:MF	0.00994579	242	3.24716e-08	275	GO:0043168	other
modified amino acid binding	87	2000	GO:MF	0.0133018	20	1	-1	GO:0072341	other
channel activity	459	2000	GO:MF	0.0152115	64	1	-1	GO:0015267	other
passive transmembrane transporter activity	460	2000	GO:MF	0.0162772	64	1	-1	GO:0022803	other
double-stranded RNA binding	70	2000	GO:MF	0.0257248	17	1	-1	GO:0003725	other
phospholipase activity	98	2000	GO:MF	0.0257577	21	1	-1	GO:0004620	other
cytokine binding	128	2000	GO:MF	0.0263722	25	1	-1	GO:0019955	other
TAP1 binding	4	2000	GO:MF	0.0292169	4	1	-1	GO:0046978	other
tumor necrosis factor receptor binding	28	2000	GO:MF	0.0296023	10	0.0323813	10	GO:0005164	other
ATP-dependent activity	548	2000	GO:MF	0.0356726	72	0.0263907	73	GO:0140657	other
lipase activity	123	2000	GO:MF	0.037843	24	1	-1	GO:0016298	other
primary amine oxidase activity	7	2000	GO:MF	0.0438315	5	1	-1	GO:0008131	other
regulation of metabolic process	5904	2015	GO:BP	1	-1	5.49189e-21	684	GO:0019222	metabolic & regulation
regulation of macromolecule metabolic process	5420	2015	GO:BP	1	-1	1.46403e-20	637	GO:0060255	metabolic & regulation
system development	3662	2015	GO:BP	1	-1	1.21223e-19	464	GO:0048731	other
cellular component organization	6027	2015	GO:BP	1	-1	1.68617e-18	684	GO:0016043	other
positive regulation of cellular metabolic process	3075	2015	GO:BP	1	-1	2.75453e-18	400	GO:0031325	metabolic & regulation
positive regulation of metabolic process	3418	2015	GO:BP	1	-1	3.44537e-18	434	GO:0009893	metabolic & regulation
regulation of cellular metabolic process	5449	2015	GO:BP	1	-1	3.54893e-18	629	GO:0031323	metabolic & regulation
macromolecule metabolic process	8296	2015	GO:BP	1	-1	8.57452e-18	884	GO:0043170	metabolic
metabolic process	10184	2015	GO:BP	1	-1	1.18575e-17	1046	GO:0008152	metabolic
positive regulation of macromolecule metabolic process	3152	2015	GO:BP	1	-1	1.40423e-17	405	GO:0010604	metabolic & regulation
organic substance metabolic process	9746	2015	GO:BP	1	-1	3.90435e-17	1006	GO:0071704	metabolic
cellular component organization or biogenesis	6224	2015	GO:BP	1	-1	1.24701e-16	693	GO:0071840	other
positive regulation of macromolecule biosynthetic process	2408	2015	GO:BP	1	-1	5.87302e-16	323	GO:0010557	regulation
regulation of nitrogen compound metabolic process	4859	2015	GO:BP	1	-1	3.03441e-15	560	GO:0051171	metabolic & regulation
regulation of macromolecule biosynthetic process	4536	2015	GO:BP	1	-1	6.45572e-15	528	GO:0010556	regulation
positive regulation of cellular biosynthetic process	2481	2015	GO:BP	1	-1	9.0283e-15	326	GO:0031328	regulation
regulation of cellular biosynthetic process	4652	2015	GO:BP	1	-1	1.01944e-14	538	GO:0031326	regulation
nitrogen compound metabolic process	8662	2015	GO:BP	1	-1	1.24988e-14	899	GO:0006807	metabolic
regulation of primary metabolic process	5001	2015	GO:BP	1	-1	1.4314e-14	570	GO:0080090	metabolic & regulation
positive regulation of biosynthetic process	2501	2015	GO:BP	1	-1	1.67205e-14	327	GO:0009891	regulation
regulation of biosynthetic process	4682	2015	GO:BP	1	-1	2.42231e-14	539	GO:0009889	regulation
regulation of gene expression	4412	2015	GO:BP	1	-1	3.10962e-14	513	GO:0010468	regulation
regulation of cellular component organization	2284	2015	GO:BP	1	-1	4.67731e-14	303	GO:0051128	regulation
cellular metabolic process	8959	2015	GO:BP	1	-1	1.85742e-13	918	GO:0044237	metabolic
primary metabolic process	9123	2015	GO:BP	1	-1	1.95796e-13	932	GO:0044238	metabolic
positive regulation of nitrogen compound metabolic process	2765	2015	GO:BP	1	-1	2.37856e-13	349	GO:0051173	metabolic & regulation
nervous system development	2326	2015	GO:BP	1	-1	5.89851e-13	303	GO:0007399	other
positive regulation of transcription by RNA polymerase II	1161	2015	GO:BP	1	-1	8.76435e-12	175	GO:0045944	regulation
negative regulation of metabolic process	2670	2015	GO:BP	1	-1	1.33888e-11	332	GO:0009892	metabolic & regulation
negative regulation of cellular metabolic process	2458	2015	GO:BP	1	-1	3.50338e-11	309	GO:0031324	metabolic & regulation
positive regulation of nucleobase-containing compound metabolic process	1905	2015	GO:BP	1	-1	5.16442e-11	252	GO:0045935	metabolic & regulation
negative regulation of macromolecule metabolic process	2469	2015	GO:BP	1	-1	6.28738e-11	309	GO:0010605	metabolic & regulation
negative regulation of cellular biosynthetic process	2083	2015	GO:BP	1	-1	1.08103e-10	269	GO:0031327	regulation
negative regulation of biosynthetic process	2094	2015	GO:BP	1	-1	1.15727e-10	270	GO:0009890	regulation
animal organ development	2783	2015	GO:BP	1	-1	1.88306e-10	338	GO:0048513	other
nucleobase-containing compound metabolic process	5107	2015	GO:BP	1	-1	4.17229e-10	556	GO:0006139	metabolic
negative regulation of macromolecule biosynthetic process	2036	2015	GO:BP	1	-1	6.37535e-10	261	GO:0010558	regulation
regulation of nucleobase-containing compound metabolic process	3589	2015	GO:BP	1	-1	7.37035e-10	413	GO:0019219	metabolic & regulation
nucleic acid metabolic process	4600	2015	GO:BP	1	-1	1.051e-09	507	GO:0090304	metabolic
nucleobase-containing compound biosynthetic process	3547	2015	GO:BP	1	-1	1.14777e-09	408	GO:0034654	other
cellular aromatic compound metabolic process	5312	2015	GO:BP	1	-1	1.22012e-09	572	GO:0006725	metabolic
anatomical structure morphogenesis	2504	2015	GO:BP	1	-1	1.74527e-09	306	GO:0009653	other
regulation of nervous system development	431	2015	GO:BP	1	-1	2.07441e-09	82	GO:0051960	regulation
aromatic compound biosynthetic process	3627	2015	GO:BP	1	-1	2.31053e-09	414	GO:0019438	other
positive regulation of RNA metabolic process	1715	2015	GO:BP	1	-1	3.56678e-09	225	GO:0051254	metabolic & regulation
heterocycle biosynthetic process	3618	2015	GO:BP	1	-1	3.78747e-09	412	GO:0018130	other
heterocycle metabolic process	5268	2015	GO:BP	1	-1	3.83778e-09	565	GO:0046483	metabolic
regulation of transcription by RNA polymerase II	2281	2015	GO:BP	1	-1	4.42092e-09	282	GO:0006357	regulation
positive regulation of RNA biosynthetic process	1580	2015	GO:BP	1	-1	6.30984e-09	210	GO:1902680	regulation
regulation of neurogenesis	363	2015	GO:BP	1	-1	6.51965e-09	72	GO:0050767	regulation
cellular component assembly	2815	2015	GO:BP	1	-1	9.26101e-09	333	GO:0022607	other
positive regulation of DNA-templated transcription	1577	2015	GO:BP	1	-1	9.39793e-09	209	GO:0045893	regulation
response to endogenous stimulus	1566	2015	GO:BP	1	-1	1.53854e-08	207	GO:0009719	response
organic cyclic compound metabolic process	5545	2015	GO:BP	1	-1	1.7677e-08	586	GO:1901360	metabolic
protein modification process	2759	2015	GO:BP	1	-1	1.9006e-08	326	GO:0036211	other
transcription by RNA polymerase II	2383	2015	GO:BP	1	-1	2.07661e-08	289	GO:0006366	other
organic cyclic compound biosynthetic process	3768	2015	GO:BP	1	-1	2.15734e-08	422	GO:1901362	other
regulation of RNA biosynthetic process	3034	2015	GO:BP	1	-1	3.80345e-08	351	GO:2001141	regulation
DNA metabolic process	971	2015	GO:BP	1	-1	3.82654e-08	142	GO:0006259	metabolic
negative regulation of cellular component organization	671	2015	GO:BP	1	-1	3.87225e-08	108	GO:0051129	regulation
cellular biosynthetic process	6883	2015	GO:BP	1	-1	4.08997e-08	703	GO:0044249	other
neurogenesis	1622	2015	GO:BP	1	-1	4.23704e-08	211	GO:0022008	other
response to nitrogen compound	977	2015	GO:BP	1	-1	5.99559e-08	142	GO:1901698	response
organic substance biosynthetic process	6956	2015	GO:BP	1	-1	6.61355e-08	708	GO:1901576	other
negative regulation of developmental process	844	2015	GO:BP	1	-1	7.00765e-08	127	GO:0051093	regulation
negative regulation of nitrogen compound metabolic process	1999	2015	GO:BP	1	-1	8.35277e-08	248	GO:0051172	metabolic & regulation
cellular response to nitrogen compound	628	2015	GO:BP	1	-1	8.35347e-08	102	GO:1901699	response
cellular response to endogenous stimulus	1337	2015	GO:BP	1	-1	9.13835e-08	180	GO:0071495	response
regulation of DNA-templated transcription	3017	2015	GO:BP	1	-1	1.06309e-07	347	GO:0006355	regulation
macromolecule modification	2978	2015	GO:BP	1	-1	1.19135e-07	343	GO:0043412	other
RNA biosynthetic process	3157	2015	GO:BP	1	-1	1.24234e-07	360	GO:0032774	other
negative regulation of cell differentiation	617	2015	GO:BP	1	-1	1.47332e-07	100	GO:0045596	regulation
regulation of RNA metabolic process	3310	2015	GO:BP	1	-1	1.54923e-07	374	GO:0051252	metabolic & regulation
cellular response to stress	1667	2015	GO:BP	1	-1	1.75985e-07	213	GO:0033554	response
biosynthetic process	7008	2015	GO:BP	1	-1	2.13717e-07	709	GO:0009058	other
regulation of organelle organization	1115	2015	GO:BP	1	-1	2.17477e-07	155	GO:0033043	regulation
apoptotic signaling pathway	572	2015	GO:BP	1	-1	2.58958e-07	94	GO:0097190	other
DNA-templated transcription	3129	2015	GO:BP	1	-1	3.29384e-07	355	GO:0006351	other
cellular nitrogen compound metabolic process	5672	2015	GO:BP	1	-1	3.4006e-07	589	GO:0034641	metabolic
negative regulation of nucleobase-containing compound metabolic process	1417	2015	GO:BP	1	-1	3.55233e-07	186	GO:0045934	metabolic & regulation
macromolecule biosynthetic process	6072	2015	GO:BP	1	-1	4.36622e-07	624	GO:0009059	other
positive regulation of cell migration	520	2015	GO:BP	1	-1	5.07505e-07	87	GO:0030335	regulation
tissue development	1878	2015	GO:BP	1	-1	5.82819e-07	232	GO:0009888	other
modulation of chemical synaptic transmission	448	2015	GO:BP	1	-1	6.51396e-07	78	GO:0050804	other
regulation of trans-synaptic signaling	449	2015	GO:BP	1	-1	7.25551e-07	78	GO:0099177	regulation
positive regulation of cell motility	542	2015	GO:BP	1	-1	8.43633e-07	89	GO:2000147	regulation
cellular component biogenesis	3070	2015	GO:BP	1	-1	8.80855e-07	347	GO:0044085	other
phosphate-containing compound metabolic process	2366	2015	GO:BP	1	-1	1.01399e-06	279	GO:0006796	metabolic
negative regulation of RNA biosynthetic process	1197	2015	GO:BP	1	-1	1.1245e-06	161	GO:1902679	regulation
response to organonitrogen compound	900	2015	GO:BP	1	-1	1.24862e-06	129	GO:0010243	response
synaptic signaling	714	2015	GO:BP	1	-1	1.60244e-06	108	GO:0099536	other
negative regulation of intracellular signal transduction	515	2015	GO:BP	1	-1	1.6215e-06	85	GO:1902532	regulation
negative regulation of DNA-templated transcription	1184	2015	GO:BP	1	-1	1.6272e-06	159	GO:0045892	regulation
regulation of protein metabolic process	1953	2015	GO:BP	1	-1	1.94228e-06	237	GO:0051246	metabolic & regulation
cellular response to organonitrogen compound	571	2015	GO:BP	1	-1	2.57117e-06	91	GO:0071417	response
phosphorus metabolic process	2389	2015	GO:BP	1	-1	2.72704e-06	279	GO:0006793	metabolic
positive regulation of locomotion	556	2015	GO:BP	1	-1	3.1327e-06	89	GO:0040017	regulation
chemical synaptic transmission	687	2015	GO:BP	1	-1	3.17706e-06	104	GO:0007268	other
anterograde trans-synaptic signaling	687	2015	GO:BP	1	-1	3.17706e-06	104	GO:0098916	other
gene expression	5627	2015	GO:BP	1	-1	3.39295e-06	578	GO:0010467	other
generation of neurons	1401	2015	GO:BP	1	-1	3.8582e-06	180	GO:0048699	other
plasma membrane bounded cell projection organization	1470	2015	GO:BP	1	-1	3.98653e-06	187	GO:0120036	other
cell projection organization	1510	2015	GO:BP	1	-1	4.1463e-06	191	GO:0030030	other
trans-synaptic signaling	692	2015	GO:BP	1	-1	4.74931e-06	104	GO:0099537	other
organelle organization	3372	2015	GO:BP	1	-1	5.06963e-06	371	GO:0006996	other
cellular nitrogen compound biosynthetic process	4276	2015	GO:BP	1	-1	6.32042e-06	454	GO:0044271	other
negative regulation of locomotion	316	2015	GO:BP	1	-1	6.63557e-06	59	GO:0040013	regulation
negative regulation of RNA metabolic process	1304	2015	GO:BP	1	-1	6.67588e-06	169	GO:0051253	metabolic & regulation
response to organic cyclic compound	825	2015	GO:BP	1	-1	7.82636e-06	118	GO:0014070	response
organonitrogen compound metabolic process	5469	2015	GO:BP	1	-1	1.1614e-05	560	GO:1901564	metabolic
production of molecular mediator of immune response	207	2015	GO:BP	1	-1	1.20875e-05	44	GO:0002440	response
homeostasis of number of cells	301	2015	GO:BP	1	-1	1.89113e-05	56	GO:0048872	other
extrinsic apoptotic signaling pathway	218	2015	GO:BP	1	-1	2.11609e-05	45	GO:0097191	other
transport	4050	2015	GO:BP	1	-1	2.75598e-05	429	GO:0006810	other
central nervous system development	938	2015	GO:BP	1	-1	3.06329e-05	128	GO:0007417	other
anatomical structure formation involved in morphogenesis	1120	2015	GO:BP	1	-1	3.33922e-05	147	GO:0048646	other
neuron differentiation	1321	2015	GO:BP	1	-1	4.83383e-05	167	GO:0030182	other
growth	872	2015	GO:BP	1	-1	5.45405e-05	120	GO:0040007	other
positive regulation of cellular component organization	1054	2015	GO:BP	1	-1	6.23257e-05	139	GO:0051130	regulation
DNA damage response	839	2015	GO:BP	1	-1	7.23856e-05	116	GO:0006974	response
tube morphogenesis	831	2015	GO:BP	1	-1	7.89361e-05	115	GO:0035239	other
regulation of cellular component biogenesis	907	2015	GO:BP	1	-1	8.44451e-05	123	GO:0044087	regulation
negative regulation of transcription by RNA polymerase II	879	2015	GO:BP	1	-1	8.55877e-05	120	GO:0000122	regulation
regulation of developmental growth	299	2015	GO:BP	1	-1	9.8414e-05	54	GO:0048638	regulation
enzyme-linked receptor protein signaling pathway	912	2015	GO:BP	1	-1	0.000115287	123	GO:0007167	other
muscle cell proliferation	200	2015	GO:BP	1	-1	0.000115735	41	GO:0033002	other
negative regulation of neurogenesis	136	2015	GO:BP	1	-1	0.000117718	32	GO:0050768	regulation
multicellular organismal-level homeostasis	763	2015	GO:BP	1	-1	0.000119705	107	GO:0048871	other
negative regulation of nervous system development	143	2015	GO:BP	1	-1	0.000120997	33	GO:0051961	regulation
positive regulation of nervous system development	270	2015	GO:BP	1	-1	0.000135617	50	GO:0051962	regulation
regulation of growth	576	2015	GO:BP	1	-1	0.000157854	86	GO:0040008	regulation
tube development	1036	2015	GO:BP	1	-1	0.000201854	135	GO:0035295	other
regulation of anatomical structure morphogenesis	790	2015	GO:BP	1	-1	0.000210041	109	GO:0022603	regulation
negative regulation of gene expression	1037	2015	GO:BP	1	-1	0.000213598	135	GO:0010629	regulation
protein metabolic process	4485	2015	GO:BP	1	-1	0.000227068	462	GO:0019538	metabolic
regulation of cell projection organization	628	2015	GO:BP	1	-1	0.000269477	91	GO:0031344	regulation
positive regulation of smooth muscle cell proliferation	82	2015	GO:BP	1	-1	0.000292231	23	GO:0048661	regulation
developmental growth	621	2015	GO:BP	1	-1	0.000313574	90	GO:0048589	other
response to inorganic substance	505	2015	GO:BP	1	-1	0.000318635	77	GO:0010035	response
rhythmic process	278	2015	GO:BP	1	-1	0.000349564	50	GO:0048511	other
reproduction	1391	2015	GO:BP	1	-1	0.000361059	170	GO:0000003	other
post-translational protein modification	912	2015	GO:BP	1	-1	0.00036386	121	GO:0043687	other
regulation of plasma membrane bounded cell projection organization	614	2015	GO:BP	1	-1	0.000364868	89	GO:0120035	regulation
reproductive process	1382	2015	GO:BP	1	-1	0.000378426	169	GO:0022414	other
RNA metabolic process	4091	2015	GO:BP	1	-1	0.000465837	424	GO:0016070	metabolic
immune system development	195	2015	GO:BP	1	-1	0.000478679	39	GO:0002520	other
transmembrane receptor protein tyrosine kinase signaling pathway	584	2015	GO:BP	1	-1	0.000576694	85	GO:0007169	other
positive regulation of neurogenesis	228	2015	GO:BP	1	-1	0.000658105	43	GO:0050769	regulation
cytoskeleton organization	1424	2015	GO:BP	1	-1	0.000661175	172	GO:0007010	other
regulation of production of molecular mediator of immune response	175	2015	GO:BP	1	-1	0.000671579	36	GO:0002700	regulation & response
cellular localization	3213	2015	GO:BP	1	-1	0.000786139	342	GO:0051641	other
cell morphogenesis	916	2015	GO:BP	1	-1	0.000802355	120	GO:0000902	other
negative regulation of cell migration	270	2015	GO:BP	1	-1	0.000875149	48	GO:0030336	regulation
positive regulation of production of molecular mediator of immune response	127	2015	GO:BP	1	-1	0.000959215	29	GO:0002702	regulation & response
response to mechanical stimulus	208	2015	GO:BP	1	-1	0.000993165	40	GO:0009612	response
microtubule cytoskeleton organization	620	2015	GO:BP	1	-1	0.00107799	88	GO:0000226	other
positive regulation of neuroinflammatory response	15	2015	GO:BP	1	-1	0.00127287	9	GO:0150078	regulation & response
anatomical structure arrangement	15	2015	GO:BP	1	-1	0.00127287	9	GO:0048532	other
regulation of DNA-templated DNA replication initiation	15	2015	GO:BP	1	-1	0.00127287	9	GO:0030174	regulation
response to abiotic stimulus	1041	2015	GO:BP	1	-1	0.00129837	132	GO:0009628	response
regulation of DNA-templated DNA replication	47	2015	GO:BP	1	-1	0.00132116	16	GO:0090329	regulation
cellular anatomical entity morphogenesis	736	2015	GO:BP	1	-1	0.00146048	100	GO:0032989	other
regulation of neuron projection development	428	2015	GO:BP	1	-1	0.00161861	66	GO:0010975	regulation
negative regulation of chemotaxis	59	2015	GO:BP	1	-1	0.00169954	18	GO:0050922	regulation
epithelium development	1147	2015	GO:BP	1	-1	0.00191211	142	GO:0060429	other
regulation of synaptic plasticity	190	2015	GO:BP	1	-1	0.00192022	37	GO:0048167	regulation
cell cycle DNA replication	43	2015	GO:BP	1	-1	0.00207133	15	GO:0044786	other
neuron projection development	943	2015	GO:BP	1	-1	0.00211162	121	GO:0031175	other
regulation of DNA replication	118	2015	GO:BP	1	-1	0.00226597	27	GO:0006275	regulation
plasma membrane bounded cell projection morphogenesis	622	2015	GO:BP	1	-1	0.00232813	87	GO:0120039	other
intrinsic apoptotic signaling pathway	296	2015	GO:BP	1	-1	0.00246186	50	GO:0097193	other
protein modification by small protein conjugation or removal	861	2015	GO:BP	1	-1	0.00278038	112	GO:0070647	other
negative regulation of T cell differentiation	44	2015	GO:BP	1	-1	0.0029018	15	GO:0045581	regulation
cell projection morphogenesis	627	2015	GO:BP	1	-1	0.00325273	87	GO:0048858	other
T cell cytokine production	34	2015	GO:BP	1	-1	0.00330826	13	GO:0002369	other
regulation of neuroinflammatory response	34	2015	GO:BP	1	-1	0.00330826	13	GO:0150077	regulation & response
regulation of T cell cytokine production	34	2015	GO:BP	1	-1	0.00330826	13	GO:0002724	regulation
gland development	428	2015	GO:BP	1	-1	0.00335451	65	GO:0048732	other
regulation of extrinsic apoptotic signaling pathway	149	2015	GO:BP	1	-1	0.00336526	31	GO:2001236	regulation
negative regulation of canonical NF-kappaB signal transduction	50	2015	GO:BP	1	-1	0.00340372	16	GO:0043124	regulation
negative regulation of cell motility	283	2015	GO:BP	1	-1	0.00355014	48	GO:2000146	regulation
negative regulation of organelle organization	334	2015	GO:BP	1	-1	0.00377602	54	GO:0010639	regulation
DNA repair	566	2015	GO:BP	1	-1	0.00415838	80	GO:0006281	other
regulation of gliogenesis	101	2015	GO:BP	1	-1	0.00434276	24	GO:0014013	regulation
regulation of catalytic activity	1155	2015	GO:BP	1	-1	0.0045349	141	GO:0050790	regulation
multicellular organism growth	144	2015	GO:BP	1	-1	0.00478702	30	GO:0035264	other
gland morphogenesis	123	2015	GO:BP	1	-1	0.00532659	27	GO:0022612	other
cellular response to organic cyclic compound	497	2015	GO:BP	1	-1	0.00551535	72	GO:0071407	response
regulation of neuron apoptotic process	214	2015	GO:BP	1	-1	0.00553816	39	GO:0043523	regulation
regulation of transferase activity	561	2015	GO:BP	1	-1	0.0055523	79	GO:0051338	regulation
neuron apoptotic process	255	2015	GO:BP	1	-1	0.00595687	44	GO:0051402	other
regulation of chromosome organization	239	2015	GO:BP	1	-1	0.0061561	42	GO:0033044	regulation
positive regulation of protein metabolic process	1152	2015	GO:BP	1	-1	0.00628991	140	GO:0051247	metabolic & regulation
leukocyte homeostasis	103	2015	GO:BP	1	-1	0.0062935	24	GO:0001776	other
positive chemotaxis	58	2015	GO:BP	1	-1	0.0063588	17	GO:0050918	other
regulation of smooth muscle cell proliferation	132	2015	GO:BP	1	-1	0.00712619	28	GO:0048660	regulation
regulation of type 2 immune response	31	2015	GO:BP	1	-1	0.00719941	12	GO:0002828	regulation & response
regulation of apoptotic signaling pathway	359	2015	GO:BP	1	-1	0.00762005	56	GO:2001233	regulation
response to hormone	812	2015	GO:BP	1	-1	0.0077918	105	GO:0009725	response
sexual reproduction	980	2015	GO:BP	1	-1	0.00869833	122	GO:0019953	other
immunoglobulin production	98	2015	GO:BP	1	-1	0.00882988	23	GO:0002377	other
symbiont entry into host	156	2015	GO:BP	1	-1	0.00926008	31	GO:0044409	other
neuron development	1081	2015	GO:BP	1	-1	0.00952061	132	GO:0048666	other
exocytosis	327	2015	GO:BP	1	-1	0.00953901	52	GO:0006887	other
regulation of type I interferon production	113	2015	GO:BP	1	-1	0.0106898	25	GO:0032479	regulation
type I interferon production	113	2015	GO:BP	1	-1	0.0106898	25	GO:0032606	other
positive regulation of organelle organization	488	2015	GO:BP	1	-1	0.0107224	70	GO:0010638	regulation
response to peptide	479	2015	GO:BP	1	-1	0.0107941	69	GO:1901652	response
circadian rhythm	188	2015	GO:BP	1	-1	0.0108449	35	GO:0007623	other
epithelial tube morphogenesis	320	2015	GO:BP	1	-1	0.0110065	51	GO:0060562	other
cellular response to inorganic substance	220	2015	GO:BP	1	-1	0.0110659	39	GO:0071241	response
cellular response to peptide	346	2015	GO:BP	1	-1	0.0111204	54	GO:1901653	response
muscle structure development	648	2015	GO:BP	1	-1	0.0123727	87	GO:0061061	other
negative regulation of developmental growth	100	2015	GO:BP	1	-1	0.0127015	23	GO:0048640	regulation
regulation of alpha-beta T cell differentiation	67	2015	GO:BP	1	-1	0.0129209	18	GO:0046637	regulation
smooth muscle cell proliferation	136	2015	GO:BP	1	-1	0.0130808	28	GO:0048659	other
glial cell activation	55	2015	GO:BP	1	-1	0.0137919	16	GO:0061900	other
regulation of T-helper 1 cell differentiation	11	2015	GO:BP	1	-1	0.0144031	7	GO:0045625	regulation
ameboidal-type cell migration	411	2015	GO:BP	1	-1	0.0146335	61	GO:0001667	other
synapse organization	447	2015	GO:BP	1	-1	0.0147164	65	GO:0050808	other
defense response to Gram-positive bacterium	94	2015	GO:BP	1	-1	0.0148984	22	GO:0050830	response
import into cell	884	2015	GO:BP	1	-1	0.0160683	111	GO:0098657	other
regulation of axonogenesis	145	2015	GO:BP	1	-1	0.0163459	29	GO:0050770	regulation
neuron projection morphogenesis	606	2015	GO:BP	1	-1	0.0169782	82	GO:0048812	other
interferon-beta production	56	2015	GO:BP	1	-1	0.0178274	16	GO:0032608	other
regulation of interferon-beta production	56	2015	GO:BP	1	-1	0.0178274	16	GO:0032648	regulation
positive regulation of cellular component biogenesis	478	2015	GO:BP	1	-1	0.0192735	68	GO:0044089	regulation
nuclear DNA replication	39	2015	GO:BP	1	-1	0.0195097	13	GO:0033260	other
type 2 immune response	39	2015	GO:BP	1	-1	0.0195097	13	GO:0042092	response
regulation of neuron differentiation	185	2015	GO:BP	1	-1	0.0196412	34	GO:0045664	regulation
neuroinflammatory response	76	2015	GO:BP	1	-1	0.0225631	19	GO:0150076	response
negative regulation of response to cytokine stimulus	76	2015	GO:BP	1	-1	0.0225631	19	GO:0060761	regulation & response
sister chromatid cohesion	51	2015	GO:BP	1	-1	0.02305	15	GO:0007062	other
protein modification by small protein conjugation	786	2015	GO:BP	1	-1	0.0262917	100	GO:0032446	other
head development	709	2015	GO:BP	1	-1	0.0269228	92	GO:0060322	other
symbiont entry into host cell	149	2015	GO:BP	1	-1	0.0283119	29	GO:0046718	other
negative regulation of neuron projection development	134	2015	GO:BP	1	-1	0.0288346	27	GO:0010977	regulation
gliogenesis	331	2015	GO:BP	1	-1	0.0288398	51	GO:0042063	other
hepatocyte growth factor receptor signaling pathway	12	2015	GO:BP	1	-1	0.0320741	7	GO:0048012	other
circulatory system development	1078	2015	GO:BP	1	-1	0.0328174	129	GO:0072359	other
cell morphogenesis involved in neuron differentiation	551	2015	GO:BP	1	-1	0.0332666	75	GO:0048667	other
positive regulation of T cell cytokine production	25	2015	GO:BP	1	-1	0.0340468	10	GO:0002726	regulation
positive regulation of canonical NF-kappaB signal transduction	190	2015	GO:BP	1	-1	0.0353586	34	GO:0043123	regulation
organelle assembly	940	2015	GO:BP	1	-1	0.036165	115	GO:0070925	other
tissue morphogenesis	581	2015	GO:BP	1	-1	0.0371592	78	GO:0048729	other
negative regulation of molecular function	629	2015	GO:BP	1	-1	0.038416	83	GO:0044092	regulation
regulation of vascular permeability	47	2015	GO:BP	1	-1	0.0384742	14	GO:0043114	regulation
negative regulation of lymphocyte differentiation	53	2015	GO:BP	1	-1	0.0385427	15	GO:0045620	regulation
regulation of protein serine/threonine kinase activity	240	2015	GO:BP	1	-1	0.0385429	40	GO:0071900	regulation
cell junction organization	706	2015	GO:BP	1	-1	0.0388955	91	GO:0034330	other
positive regulation of developmental growth	152	2015	GO:BP	1	-1	0.042031	29	GO:0048639	regulation
tumor necrosis factor-mediated signaling pathway	100	2015	GO:BP	1	-1	0.0425643	22	GO:0033209	other
liver development	137	2015	GO:BP	1	-1	0.0438765	27	GO:0001889	other
developmental maturation	319	2015	GO:BP	1	-1	0.0458268	49	GO:0021700	other
establishment of localization in cell	1874	2015	GO:BP	1	-1	0.0459058	205	GO:0051649	other
organelle localization	594	2015	GO:BP	1	-1	0.0459965	79	GO:0051640	other
non-canonical NF-kappaB signal transduction	115	2015	GO:BP	1	-1	0.0464531	24	GO:0038061	other
negative regulation of inflammatory response	153	2015	GO:BP	1	-1	0.0478004	29	GO:0050728	regulation & response
meiotic chromosome separation	9	2015	GO:BP	1	-1	0.047908	6	GO:0051307	other
regulation of chemokine-mediated signaling pathway	9	2015	GO:BP	1	-1	0.047908	6	GO:0070099	regulation
intracellular anatomical structure	13556	2015	GO:CC	1	-1	1.60746e-37	1404	GO:0005622	other
organelle	12860	2015	GO:CC	1	-1	3.43726e-29	1317	GO:0043226	other
cytoplasm	11163	2015	GO:CC	1	-1	1.78652e-27	1171	GO:0005737	other
intracellular organelle	12139	2015	GO:CC	1	-1	1.90685e-26	1247	GO:0043229	other
membrane-bounded organelle	12116	2015	GO:CC	1	-1	4.62609e-25	1239	GO:0043227	other
intracellular membrane-bounded organelle	11123	2015	GO:CC	1	-1	4.19071e-23	1148	GO:0043231	other
nucleus	6932	2015	GO:CC	1	-1	4.88327e-17	755	GO:0005634	other
non-membrane-bounded organelle	4895	2015	GO:CC	1	-1	8.21977e-17	567	GO:0043228	other
intracellular non-membrane-bounded organelle	4894	2015	GO:CC	1	-1	1.27657e-16	566	GO:0043232	other
nucleoplasm	3880	2015	GO:CC	1	-1	1.19351e-15	465	GO:0005654	other
nuclear lumen	4257	2015	GO:CC	1	-1	9.59719e-14	492	GO:0031981	other
protein-DNA complex	1233	2015	GO:CC	1	-1	2.78731e-12	182	GO:0032993	other
chromatin	1166	2015	GO:CC	1	-1	6.85951e-11	170	GO:0000785	other
cytosol	5144	2015	GO:CC	1	-1	1.12392e-10	558	GO:0005829	other
membrane-enclosed lumen	5324	2015	GO:CC	1	-1	4.75798e-08	558	GO:0031974	other
intracellular organelle lumen	5324	2015	GO:CC	1	-1	4.75798e-08	558	GO:0070013	other
organelle lumen	5324	2015	GO:CC	1	-1	4.75798e-08	558	GO:0043233	other
protein-containing complex	5865	2015	GO:CC	1	-1	1.06486e-06	597	GO:0032991	other
synapse	1372	2015	GO:CC	1	-1	2.96431e-06	174	GO:0045202	other
cytoskeleton	2252	2015	GO:CC	1	-1	4.94697e-06	260	GO:0005856	other
cell junction	2082	2015	GO:CC	1	-1	9.48356e-06	242	GO:0030054	other
cell projection	2239	2015	GO:CC	1	-1	5.11155e-05	253	GO:0042995	other
plasma membrane bounded cell projection	2132	2015	GO:CC	1	-1	0.000101986	241	GO:0120025	other
neuron projection	1235	2015	GO:CC	1	-1	0.000105951	153	GO:0043005	other
centrosome	692	2015	GO:CC	1	-1	0.000493827	94	GO:0005813	other
microtubule cytoskeleton	1327	2015	GO:CC	1	-1	0.00115496	157	GO:0015630	other
presynapse	530	2015	GO:CC	1	-1	0.00128361	75	GO:0098793	other
somatodendritic compartment	795	2015	GO:CC	1	-1	0.00137508	103	GO:0036477	other
axon	618	2015	GO:CC	1	-1	0.00172467	84	GO:0030424	other
microtubule organizing center	825	2015	GO:CC	1	-1	0.00244869	105	GO:0005815	other
synaptic vesicle	198	2015	GO:CC	1	-1	0.00546157	35	GO:0008021	other
RNA polymerase II transcription regulator complex	233	2015	GO:CC	1	-1	0.00685658	39	GO:0090575	other
transcription regulator complex	472	2015	GO:CC	1	-1	0.00703817	66	GO:0005667	other
dendritic tree	587	2015	GO:CC	1	-1	0.00829325	78	GO:0097447	other
endomembrane system	4452	2015	GO:CC	1	-1	0.00901573	439	GO:0012505	other
synaptic membrane	368	2015	GO:CC	1	-1	0.0103135	54	GO:0097060	other
dendrite	585	2015	GO:CC	1	-1	0.0129074	77	GO:0030425	other
spindle	409	2015	GO:CC	1	-1	0.0145477	58	GO:0005819	other
exocytic vesicle	216	2015	GO:CC	1	-1	0.0153699	36	GO:0070382	other
nuclear chromosome	208	2015	GO:CC	1	-1	0.015903	35	GO:0000228	other
cell body	533	2015	GO:CC	1	-1	0.0174106	71	GO:0044297	other
P-body	99	2015	GO:CC	1	-1	0.0179582	21	GO:0000932	other
replication fork	71	2015	GO:CC	1	-1	0.0183223	17	GO:0005657	other
vacuole	800	2015	GO:CC	1	-1	0.022177	98	GO:0005773	other
main axon	67	2015	GO:CC	1	-1	0.0311365	16	GO:0044304	other
neuronal cell body	468	2015	GO:CC	1	-1	0.0331982	63	GO:0043025	other
cytoplasmic ribonucleoprotein granule	242	2015	GO:CC	1	-1	0.0357887	38	GO:0036464	other
supramolecular complex	1309	2015	GO:CC	1	-1	0.0474636	146	GO:0099080	other
ion binding	5640	2015	GO:MF	1	-1	1.47901e-11	610	GO:0043167	other
small molecule binding	5828	2015	GO:MF	1	-1	1.5181e-11	627	GO:0036094	other
DNA binding	2228	2015	GO:MF	1	-1	8.24931e-11	282	GO:0003677	other
organic cyclic compound binding	5535	2015	GO:MF	1	-1	2.76064e-10	593	GO:0097159	other
enzyme binding	1975	2015	GO:MF	1	-1	4.30192e-09	249	GO:0019899	other
nucleotide binding	2027	2015	GO:MF	1	-1	1.36338e-08	252	GO:0000166	other
nucleoside phosphate binding	2028	2015	GO:MF	1	-1	1.43461e-08	252	GO:1901265	other
DNA-binding transcription activator activity	439	2015	GO:MF	1	-1	2.89091e-08	79	GO:0001216	other
heterocyclic compound binding	2155	2015	GO:MF	1	-1	3.28929e-08	263	GO:1901363	other
purine ribonucleoside triphosphate binding	1716	2015	GO:MF	1	-1	5.23432e-08	218	GO:0035639	other
ribonucleotide binding	1797	2015	GO:MF	1	-1	5.85258e-08	226	GO:0032553	other
purine ribonucleotide binding	1780	2015	GO:MF	1	-1	6.76791e-08	224	GO:0032555	other
DNA-binding transcription activator activity, RNA polymerase II-specific	433	2015	GO:MF	1	-1	9.10892e-08	77	GO:0001228	other
purine nucleotide binding	1880	2015	GO:MF	1	-1	3.14748e-07	231	GO:0017076	other
double-stranded DNA binding	1472	2015	GO:MF	1	-1	7.83e-07	188	GO:0003690	other
DNA-binding transcription factor activity, RNA polymerase II-specific	1200	2015	GO:MF	1	-1	2.24834e-06	158	GO:0000981	other
protein dimerization activity	974	2015	GO:MF	1	-1	2.48186e-06	134	GO:0046983	other
sequence-specific DNA binding	1485	2015	GO:MF	1	-1	2.62757e-06	187	GO:0043565	other
DNA-binding transcription factor activity	1278	2015	GO:MF	1	-1	4.0709e-06	165	GO:0003700	other
adenyl ribonucleotide binding	1461	2015	GO:MF	1	-1	5.83134e-06	183	GO:0032559	other
ATP binding	1403	2015	GO:MF	1	-1	6.17955e-06	177	GO:0005524	other
catalytic activity	5205	2015	GO:MF	1	-1	7.26945e-06	534	GO:0003824	other
catalytic activity, acting on a protein	2132	2015	GO:MF	1	-1	7.27746e-06	249	GO:0140096	other
cis-regulatory region sequence-specific DNA binding	1088	2015	GO:MF	1	-1	8.25065e-06	144	GO:0000987	other
sequence-specific double-stranded DNA binding	1385	2015	GO:MF	1	-1	1.12338e-05	174	GO:1990837	other
adenyl nucleotide binding	1560	2015	GO:MF	1	-1	2.4687e-05	190	GO:0030554	other
kinase binding	744	2015	GO:MF	1	-1	3.44307e-05	105	GO:0019900	other
RNA polymerase II cis-regulatory region sequence-specific DNA binding	1066	2015	GO:MF	1	-1	3.71657e-05	139	GO:0000978	other
transcription cis-regulatory region binding	1331	2015	GO:MF	1	-1	4.00326e-05	166	GO:0000976	other
transcription regulatory region nucleic acid binding	1333	2015	GO:MF	1	-1	4.42675e-05	166	GO:0001067	other
RNA polymerase II transcription regulatory region sequence-specific DNA binding	1240	2015	GO:MF	1	-1	9.73604e-05	155	GO:0000977	other
metal ion binding	3984	2015	GO:MF	1	-1	0.000111002	415	GO:0046872	other
cation binding	4064	2015	GO:MF	1	-1	0.000303271	419	GO:0043169	other
transcription regulator activity	1744	2015	GO:MF	1	-1	0.000371732	202	GO:0140110	other
tumor necrosis factor receptor superfamily binding	44	2015	GO:MF	1	-1	0.000866772	15	GO:0032813	other
protein kinase binding	663	2015	GO:MF	1	-1	0.0008961	91	GO:0019901	other
protein-containing complex binding	1636	2015	GO:MF	1	-1	0.00104749	189	GO:0044877	other
hydrolase activity	2243	2015	GO:MF	1	-1	0.00108719	247	GO:0016787	other
chromatin binding	544	2015	GO:MF	1	-1	0.00182374	77	GO:0003682	other
transferase activity	2140	2015	GO:MF	1	-1	0.00245463	235	GO:0016740	other
ubiquitin-like protein ligase activity	336	2015	GO:MF	1	-1	0.00295136	53	GO:0061659	other
aminoacyltransferase activity	455	2015	GO:MF	1	-1	0.00407092	66	GO:0016755	other
protein homodimerization activity	684	2015	GO:MF	1	-1	0.00577361	90	GO:0042803	other
protein kinase activity	543	2015	GO:MF	1	-1	0.00593484	75	GO:0004672	other
protein heterodimerization activity	278	2015	GO:MF	1	-1	0.00770296	45	GO:0046982	other
acyltransferase activity	665	2015	GO:MF	1	-1	0.0100889	87	GO:0016746	other
ubiquitin protein ligase activity	319	2015	GO:MF	1	-1	0.0136885	49	GO:0061630	other
ubiquitin-like protein transferase activity	439	2015	GO:MF	1	-1	0.0175679	62	GO:0019787	other
ubiquitin-protein transferase activity	410	2015	GO:MF	1	-1	0.0299865	58	GO:0004842	other
nucleic acid binding	3638	2015	GO:MF	1	-1	0.0313599	364	GO:0003676	other
kinase activity	727	2015	GO:MF	1	-1	0.0351812	91	GO:0016301	other
chemoattractant activity	29	2015	GO:MF	1	-1	0.0457547	10	GO:0042056	other
guanylate cyclase activity	7	2015	GO:MF	1	-1	0.046632	5	GO:0004383	other
protein serine kinase activity	335	2015	GO:MF	1	-1	0.0489893	49	GO:0106310	other

## Sheet: legend
Supplemental Table S1: Comparison of the Enrichment p-values and number of genes between nominal FC and recalibration. Based selection of the top 2,000 genes in the Alasoo et al. IFNG DE experiment.
term_name	the short name of the function
term_size	number of genes associated with the GO term
query_size	number of genes that were included in the query (selected by TOP N from nominal fold change and recalibrated fold change, respectively)
source	the abbreviation of the data source for the GO term (e.g. GO:BP)
p_value_fc	hypergeometric p-value after correction for multiple testing of the gene list selected by nominal fold changes
intersection_size_fc	the number of genes in the nominal FC input query that are annotated to the corresponding term
p_value_sdg	hypergeometric p-value after correction for multiple testing of the gene list selected by recalibrated fold changes
intersection_size_sdg	the number of genes in the recalibrated FC input query that are annotated to the corresponding term
term_id	unique GO term identifier
classification	Group of GO terms this term was associated with (based on string matching)
