# Supplementary material for: Recalibrating differential gene expression by genetic dosage variance prioritizes functionally relevant genes
Source: Genome Res. 2025 Oct;35(10):2316–25. doi: 10.1101/gr.280360.124 (PMC12487816; doi:10.1101/gr.280360.124)
Supplement: Supplement 3 [file Supplemental_Table_S2.xlsx]

## Sheet: Supplemental Table S2
term_name	term_size	query_size	source	p_value_fc	intersection_size_fc	p_value_sdgBRNCTXB	intersection_size_sdgBRNCTXB	p_value_sdgMEAN	intersection_size_sdgMEAN	term_id	classification
cell communication	5003	700	GO:BP	4.2662e-16	296	5.03595e-26	324	2.05083e-17	300	GO:0007154	other
response to stimulus	6708	700	GO:BP	6.18251e-16	365	2.01298e-22	385	1.3244e-15	364	GO:0050896	response
signaling	4927	700	GO:BP	7.68528e-16	292	9.60083e-26	320	3.73157e-17	296	GO:0023052	other
multicellular organismal process	5776	700	GO:BP	2.15576e-12	316	4.19558e-17	332	5.80404e-13	318	GO:0032501	other
signal transduction	4524	700	GO:BP	1.56431e-11	261	2.16856e-16	277	6.16833e-11	259	GO:0007165	other
cellular response to stimulus	5717	700	GO:BP	2.29901e-11	310	1.37201e-16	328	2.37207e-11	310	GO:0051716	response
regulation of response to stimulus	3302	700	GO:BP	4.18283e-11	206	6.47534e-12	209	2.17082e-08	197	GO:0048583	regulation & response
regulation of signaling	2922	700	GO:BP	1.38121e-10	187	7.08029e-15	200	6.71575e-11	188	GO:0023051	regulation
response to stress	3130	700	GO:BP	2.04024e-10	196	4.59035e-09	192	5.19597e-08	188	GO:0006950	response
regulation of multicellular organismal process	2450	700	GO:BP	2.65427e-10	164	2.99042e-08	158	1.1031e-05	149	GO:0051239	regulation
regulation of cell communication	2924	700	GO:BP	3.07919e-10	186	3.32794e-15	201	3.14266e-10	186	GO:0010646	regulation
positive regulation of multicellular organismal process	1354	700	GO:BP	1.5289e-09	107	3.54327e-07	101	3.58503e-06	98	GO:0051240	regulation
positive regulation of biological process	5130	700	GO:BP	1.87507e-09	279	5.93845e-13	292	8.21254e-11	284	GO:0048518	regulation
biological regulation	9408	700	GO:BP	5.03643e-09	442	1.58699e-18	475	1.00596e-13	459	GO:0065007	regulation
regulation of signal transduction	2560	700	GO:BP	6.13085e-09	165	4.13172e-10	169	1.06735e-07	161	GO:0009966	regulation
positive regulation of response to stimulus	1895	700	GO:BP	1.43348e-08	132	8.03657e-07	127	0.00124132	116	GO:0048584	regulation & response
defense response	1307	700	GO:BP	1.47485e-08	102	1.49945e-05	94	0.000283044	90	GO:0006952	response
positive regulation of cellular process	4698	700	GO:BP	2.23014e-08	257	1.56995e-11	269	5.51915e-10	263	GO:0048522	regulation
defense response to other organism	862	700	GO:BP	2.34561e-08	77	0.0438893	61	0.000308636	67	GO:0098542	response
regulation of biological process	9110	700	GO:BP	3.15876e-08	428	9.59904e-19	465	1.23186e-13	448	GO:0050789	regulation
cell differentiation	3464	700	GO:BP	4.54844e-08	203	2.94582e-10	211	1.07474e-10	212	GO:0030154	other
cellular developmental process	3465	700	GO:BP	4.67884e-08	203	3.03882e-10	211	1.10921e-10	212	GO:0048869	other
response to biotic stimulus	1133	700	GO:BP	6.84813e-08	91	0.00768285	77	0.000342104	81	GO:0009607	response
response to external stimulus	2069	700	GO:BP	9.49834e-08	138	1.0442e-06	135	7.05485e-06	132	GO:0009605	response
immune system process	1925	700	GO:BP	9.73949e-08	131	0.000275733	120	0.000448569	119	GO:0002376	other
immune response	1272	700	GO:BP	9.9332e-08	98	0.0016809	86	1	-1	GO:0006955	response
defense response to symbiont	792	700	GO:BP	1.74727e-07	71	1	-1	0.000906128	62	GO:0140546	response
innate immune response	691	700	GO:BP	1.86926e-07	65	0.0211639	53	0.00831192	54	GO:0045087	response
regulation of cellular process	8659	700	GO:BP	3.63134e-07	407	5.71392e-15	437	3.43707e-11	423	GO:0050794	regulation
response to chemical	2917	700	GO:BP	4.83392e-07	175	1.38417e-09	184	2.56515e-07	176	GO:0042221	response
response to other organism	1101	700	GO:BP	5.41868e-07	87	0.0421769	73	0.00212115	77	GO:0051707	response
response to external biotic stimulus	1103	700	GO:BP	5.96529e-07	87	0.0451204	73	0.00228798	77	GO:0043207	response
developmental process	5153	700	GO:BP	6.31691e-07	270	1.43715e-13	295	1.00566e-09	281	GO:0032502	other
anatomical structure development	4752	700	GO:BP	1.4709e-06	252	6.20349e-13	276	1.23326e-09	264	GO:0048856	other
regulation of developmental process	2053	700	GO:BP	2.04782e-06	133	0.000142185	127	6.26263e-05	128	GO:0050793	regulation
positive regulation of signaling	1500	700	GO:BP	2.15757e-06	106	5.2432e-07	108	4.59569e-05	102	GO:0023056	regulation
cell surface receptor signaling pathway	2273	700	GO:BP	2.59452e-06	143	1.08385e-08	151	3.69777e-05	139	GO:0007166	other
positive regulation of cell communication	1494	700	GO:BP	3.72792e-06	105	9.1611e-07	107	0.000159218	100	GO:0010647	regulation
positive regulation of immune system process	838	700	GO:BP	6.17027e-06	70	1	-1	1	-1	GO:0002684	regulation
response to cytokine	735	700	GO:BP	7.4484e-06	64	0.000919851	59	0.000836332	59	GO:0034097	response
biological process involved in interspecies interaction between organisms	1257	700	GO:BP	8.23331e-06	92	1	-1	0.00366535	84	GO:0044419	other
multicellular organism development	3850	700	GO:BP	8.60959e-06	211	4.00654e-11	231	3.24419e-09	224	GO:0007275	other
regulation of immune system process	1201	700	GO:BP	9.03785e-06	89	0.00114388	83	1	-1	GO:0002682	regulation
positive regulation of signal transduction	1328	700	GO:BP	1.35507e-05	95	3.45304e-05	94	0.000607855	90	GO:0009967	regulation
monoatomic ion transmembrane transport	814	700	GO:BP	2.95073e-05	67	1.5154e-12	83	2.97618e-05	67	GO:0034220	other
transmembrane transport	1236	700	GO:BP	3.87483e-05	89	5.8187e-14	111	1.47227e-06	93	GO:0055085	other
cellular response to chemical stimulus	2189	700	GO:BP	3.9536e-05	135	6.62472e-06	138	0.000144056	133	GO:0070887	response
cell development	2321	700	GO:BP	4.15342e-05	141	1.18714e-07	150	2.24273e-08	152	GO:0048468	other
positive regulation of developmental process	1122	700	GO:BP	4.35296e-05	83	0.00116744	79	0.00104011	79	GO:0051094	regulation
tissue development	1581	700	GO:BP	4.43628e-05	106	0.000216008	104	0.00281599	100	GO:0009888	other
biological_process	13665	700	GO:BP	5.59568e-05	571	3.81488e-20	616	5.01086e-16	605	GO:0008150	other
inorganic ion transmembrane transport	723	700	GO:BP	7.0828e-05	61	2.3308e-11	75	0.000183158	60	GO:0098660	other
response to organic substance	2145	700	GO:BP	7.38003e-05	132	4.66778e-05	133	3.90738e-05	133	GO:0010033	response
inorganic cation transmembrane transport	655	700	GO:BP	8.15758e-05	57	1.76728e-10	69	0.000564234	55	GO:0098662	other
monoatomic ion transport	1001	700	GO:BP	0.000176975	75	2.1808e-12	94	1.38723e-05	78	GO:0006811	other
system development	3307	700	GO:BP	0.000207027	182	3.7528e-13	213	3.38202e-09	200	GO:0048731	other
regulation of localization	1757	700	GO:BP	0.000246872	112	1.55518e-12	136	0.000249756	112	GO:0032879	regulation
monoatomic cation transmembrane transport	676	700	GO:BP	0.000257798	57	7.95449e-11	71	0.000663793	56	GO:0098655	other
regulation of multicellular organismal development	1181	700	GO:BP	0.000472448	83	1	-1	0.0180221	78	GO:2000026	regulation
intracellular signal transduction	2300	700	GO:BP	0.000506097	136	1.19453e-07	149	1.07284e-08	152	GO:0035556	other
cellular response to cytokine stimulus	657	700	GO:BP	0.000622586	55	0.0245738	51	0.0226922	51	GO:0071345	response
epithelium development	936	700	GO:BP	0.000663061	70	0.00809287	67	0.0157531	66	GO:0060429	other
cellular process	12925	700	GO:BP	0.000696166	542	1.87167e-17	588	8.46536e-13	574	GO:0009987	other
anatomical structure morphogenesis	2202	700	GO:BP	0.00070537	131	1.54153e-07	144	4.19889e-06	139	GO:0009653	other
intracellular signaling cassette	1584	700	GO:BP	0.000809925	102	4.60475e-09	118	1.07159e-07	114	GO:0141124	other
regulation of intracellular signal transduction	1522	700	GO:BP	0.00082453	99	5.65498e-05	103	1.0778e-06	108	GO:1902531	regulation
response to wounding	473	700	GO:BP	0.000907908	44	8.28841e-09	54	0.000315543	45	GO:0009611	response
monoatomic cation transport	835	700	GO:BP	0.00116321	64	6.68309e-11	81	0.000207951	66	GO:0006812	other
regulation of defense response	616	700	GO:BP	0.00120146	52	0.0202789	49	0.0447194	48	GO:0031347	regulation & response
regulation of response to biotic stimulus	412	700	GO:BP	0.00126745	40	1	-1	1	-1	GO:0002831	regulation & response
regulation of biological quality	2358	700	GO:BP	0.0013136	137	2.00589e-07	151	1.29428e-06	148	GO:0065008	regulation
positive regulation of intracellular signal transduction	879	700	GO:BP	0.00152641	66	0.00384121	65	2.00596e-05	71	GO:1902533	regulation
system process	1480	700	GO:BP	0.00161025	96	7.87715e-09	112	0.000818578	97	GO:0003008	other
regulation of response to stress	1137	700	GO:BP	0.0018222	79	0.000971907	80	0.000183094	82	GO:0080134	regulation & response
positive regulation of gene expression	943	700	GO:BP	0.00200521	69	0.000191459	72	0.000171048	72	GO:0010628	regulation
localization	4514	700	GO:BP	0.00212727	228	4.80149e-10	256	0.000115516	234	GO:0051179	other
metal ion transport	719	700	GO:BP	0.00226155	57	5.85067e-10	72	0.00543811	56	GO:0030001	other
regulation of cell differentiation	1305	700	GO:BP	0.0022971	87	1	-1	0.0349719	83	GO:0045595	regulation
cytokine production	630	700	GO:BP	0.00249928	52	1	-1	1	-1	GO:0001816	other
regulation of response to external stimulus	876	700	GO:BP	0.00304362	65	0.00338509	65	0.0150098	63	GO:0032101	regulation & response
transport	3673	700	GO:BP	0.00368508	192	1.81659e-10	221	0.000837196	195	GO:0006810	other
regulation of cytokine production	625	700	GO:BP	0.0048448	51	1	-1	1	-1	GO:0001817	regulation
response to bacterium	470	700	GO:BP	0.0059134	42	1	-1	1	-1	GO:0009617	response
wound healing	355	700	GO:BP	0.00655083	35	3.77013e-07	43	0.00067004	37	GO:0042060	other
cell adhesion	1257	700	GO:BP	0.0073131	83	2.14355e-05	91	1	-1	GO:0007155	other
positive regulation of response to external stimulus	493	700	GO:BP	0.00822781	43	1	-1	1	-1	GO:0032103	regulation & response
positive regulation of immune response	567	700	GO:BP	0.00988614	47	1	-1	1	-1	GO:0050778	regulation & response
epithelial cell differentiation	533	700	GO:BP	0.0107651	45	1	-1	1	-1	GO:0030855	other
regulation of immune response	700	700	GO:BP	0.0124896	54	1	-1	1	-1	GO:0050776	regulation & response
positive regulation of metabolic process	3049	700	GO:BP	0.012906	163	0.000232515	171	8.80361e-07	180	GO:0009893	metabolic & regulation
regulation of cellular component organization	2143	700	GO:BP	0.0156592	123	1.7624e-10	150	1.2344e-06	138	GO:0051128	regulation
cellular response to organic substance	1597	700	GO:BP	0.0160972	98	1	-1	0.0300001	97	GO:0071310	response
positive regulation of cytokine production	389	700	GO:BP	0.0206321	36	1	-1	1	-1	GO:0001819	regulation
positive regulation of cellular metabolic process	2726	700	GO:BP	0.02233	148	0.00111221	154	3.2148e-07	167	GO:0031325	metabolic & regulation
positive regulation of cell differentiation	732	700	GO:BP	0.0223979	55	1	-1	1	-1	GO:0045597	regulation
regulation of transport	1375	700	GO:BP	0.0225782	87	2.06105e-09	108	1	-1	GO:0051049	regulation
establishment of localization	3961	700	GO:BP	0.023938	200	2.06386e-09	230	0.00144484	206	GO:0051234	other
epidermis development	264	700	GO:BP	0.0273646	28	1	-1	1	-1	GO:0008544	other
regulation of anatomical structure morphogenesis	719	700	GO:BP	0.0289901	54	0.000164262	60	0.000376495	59	GO:0022603	regulation
activation of immune response	430	700	GO:BP	0.031376	38	1	-1	1	-1	GO:0002253	response
positive regulation of defense response	379	700	GO:BP	0.0314037	35	1	-1	1	-1	GO:0031349	regulation & response
potassium ion transmembrane transport	180	700	GO:BP	0.041928	22	1	-1	1	-1	GO:0071805	other
negative regulation of biological process	4434	700	GO:BP	0.0434948	218	5.74056e-07	241	4.23329e-07	241	GO:0048519	regulation
cell periphery	4506	700	GO:CC	3.40548e-15	272	1.17056e-21	291	6.49136e-09	251	GO:0071944	other
plasma membrane	4119	700	GO:CC	7.98627e-15	254	2.56572e-23	278	4.76468e-11	242	GO:0005886	other
extracellular region	3034	700	GO:CC	3.18923e-10	191	2.86031e-05	174	0.00118697	167	GO:0005576	other
membrane	7483	700	GO:CC	1.21946e-09	373	5.34646e-22	414	5.69175e-15	392	GO:0016020	other
cellular anatomical entity	14187	700	GO:CC	6.25078e-08	598	1.0872e-25	641	2.37661e-24	637	GO:0110165	other
cellular_component	14299	700	GO:CC	1.72417e-07	600	9.12225e-26	644	5.68135e-25	641	GO:0005575	other
extracellular space	2445	700	GO:CC	4.89473e-06	150	0.000466434	143	1	-1	GO:0005615	other
vesicle	3317	700	GO:CC	4.96894e-05	185	2.99595e-07	194	0.00219026	178	GO:0031982	other
cell junction	1975	700	GO:CC	0.000150681	123	3.57869e-18	161	2.83627e-09	138	GO:0030054	other
anchoring junction	803	700	GO:CC	0.000261129	64	4.91054e-08	73	0.000635406	63	GO:0070161	other
neuron projection	1150	700	GO:CC	0.0014045	80	3.35177e-11	100	6.31421e-05	84	GO:0043005	other
plasma membrane protein complex	504	700	GO:CC	0.00574359	44	0.000838444	46	0.0152002	43	GO:0098797	other
cytoplasm	10139	700	GO:CC	0.00731109	440	1.12247e-14	489	3.85646e-11	476	GO:0005737	other
monoatomic ion channel complex	281	700	GO:CC	0.0093686	30	6.25558e-05	34	0.00941036	30	GO:0034702	other
extracellular vesicle	1754	700	GO:CC	0.0190541	105	0.0219076	105	1	-1	GO:1903561	other
extracellular membrane-bounded organelle	1755	700	GO:CC	0.0195829	105	0.022513	105	1	-1	GO:0065010	other
extracellular organelle	1755	700	GO:CC	0.0195829	105	0.022513	105	1	-1	GO:0043230	other
extracellular exosome	1734	700	GO:CC	0.0199725	104	0.0125999	105	1	-1	GO:0070062	other
cell-cell junction	444	700	GO:CC	0.0260369	39	0.000146028	44	1	-1	GO:0005911	other
cell projection	2064	700	GO:CC	0.0351415	118	8.44627e-11	147	0.00199995	123	GO:0042995	other
plasma membrane bounded cell projection	1963	700	GO:CC	0.0454088	113	4.31134e-10	140	0.00457969	117	GO:0120025	other
axon	581	700	GO:CC	0.0486555	46	0.000504207	51	0.00122923	50	GO:0030424	other
molecular_function	14241	700	GO:MF	4.04778e-07	597	6.60974e-25	641	1.63272e-22	635	GO:0003674	other
binding	13422	700	GO:MF	0.00018155	561	3.13268e-19	607	1.40875e-18	604	GO:0005488	other
channel activity	395	700	GO:MF	0.000389166	40	1.00175e-06	45	0.000123115	41	GO:0015267	other
passive transmembrane transporter activity	396	700	GO:MF	0.000418079	40	1.09147e-06	45	0.000132634	41	GO:0022803	other
transporter activity	993	700	GO:MF	0.000645972	73	2.15074e-09	87	9.5212e-06	78	GO:0005215	other
gated channel activity	250	700	GO:MF	0.00248911	29	2.64761e-06	34	0.000674411	30	GO:0022836	other
protein binding	12095	700	GO:MF	0.00278211	511	3.52114e-15	556	2.6518e-15	555	GO:0005515	other
transmembrane transporter activity	896	700	GO:MF	0.00314813	66	3.32982e-09	81	1.87719e-05	72	GO:0022857	other
voltage-gated monoatomic ion channel activity	151	700	GO:MF	0.00840378	21	0.000398678	23	0.00843291	21	GO:0005244	other
voltage-gated channel activity	153	700	GO:MF	0.0105474	21	0.000515724	23	0.0105838	21	GO:0022832	other
monoatomic ion transmembrane transporter activity	576	700	GO:MF	0.015634	47	1.82905e-09	62	5.35e-06	55	GO:0015075	other
monoatomic ion channel activity	352	700	GO:MF	0.0160611	34	4.02191e-06	41	0.000534134	37	GO:0005216	other
voltage-gated monoatomic cation channel activity	133	700	GO:MF	0.0211823	19	0.0221178	19	0.0212493	19	GO:0022843	other
inorganic molecular entity transmembrane transporter activity	548	700	GO:MF	0.0234918	45	7.79499e-09	59	2.20679e-05	52	GO:0015318	other
monoatomic cation transmembrane transporter activity	489	700	GO:MF	0.0448782	41	1.09775e-07	53	3.44763e-05	48	GO:0008324	other
nervous system development	2162	702	GO:BP	1	-1	2.65076e-12	156	2.30422e-06	138	GO:0007399	other
neurogenesis	1497	702	GO:BP	1	-1	1.23812e-09	115	7.59114e-08	110	GO:0022008	other
generation of neurons	1290	702	GO:BP	1	-1	1.12635e-07	99	3.19592e-05	92	GO:0048699	other
neuron development	1008	702	GO:BP	1	-1	2.40388e-07	83	0.000544257	74	GO:0048666	other
cell-cell signaling	1398	702	GO:BP	1	-1	4.4364e-07	103	0.00332304	91	GO:0007267	other
neuron differentiation	1215	702	GO:BP	1	-1	6.66708e-07	93	8.16884e-05	87	GO:0030182	other
calcium ion transmembrane transport	291	702	GO:BP	1	-1	6.69268e-07	38	1	-1	GO:0070588	other
regulation of protein metabolic process	1818	702	GO:BP	1	-1	9.71945e-07	123	0.000118395	116	GO:0051246	metabolic & regulation
negative regulation of cellular process	4180	702	GO:BP	1	-1	1.19885e-06	229	8.4477e-08	233	GO:0048523	regulation
cell projection organization	1427	702	GO:BP	1	-1	1.48576e-06	103	0.00434293	92	GO:0030030	other
plasma membrane bounded cell projection organization	1388	702	GO:BP	1	-1	1.50087e-06	101	0.00238573	91	GO:0120036	other
neuron projection development	885	702	GO:BP	1	-1	1.89604e-06	74	0.00199223	66	GO:0031175	other
synaptic signaling	677	702	GO:BP	1	-1	2.10266e-06	62	1	-1	GO:0099536	other
cellular component organization	5570	702	GO:BP	1	-1	2.56538e-06	285	0.00017445	276	GO:0016043	other
calcium ion transport	366	702	GO:BP	1	-1	3.78578e-06	42	1	-1	GO:0006816	other
cell projection morphogenesis	587	702	GO:BP	1	-1	4.11199e-06	56	0.0017061	50	GO:0048858	other
trans-synaptic signaling	657	702	GO:BP	1	-1	4.94094e-06	60	1	-1	GO:0099537	other
cellular anatomical entity morphogenesis	676	702	GO:BP	1	-1	5.55679e-06	61	0.00407866	54	GO:0032989	other
regulation of protein modification process	1052	702	GO:BP	1	-1	1.22957e-05	81	0.000134838	78	GO:0031399	regulation
cell morphogenesis	853	702	GO:BP	1	-1	1.5227e-05	70	0.000482547	66	GO:0000902	other
plasma membrane bounded cell projection morphogenesis	582	702	GO:BP	1	-1	2.52017e-05	54	0.00337132	49	GO:0120039	other
cell migration	1251	702	GO:BP	1	-1	3.71862e-05	90	0.0458301	80	GO:0016477	other
cellular component organization or biogenesis	5762	702	GO:BP	1	-1	4.71741e-05	287	0.00362398	277	GO:0071840	other
organonitrogen compound metabolic process	5008	702	GO:BP	1	-1	6.33378e-05	256	1.00471e-05	259	GO:1901564	metabolic
chemical synaptic transmission	652	702	GO:BP	1	-1	7.64949e-05	57	1	-1	GO:0007268	other
anterograde trans-synaptic signaling	652	702	GO:BP	1	-1	7.64949e-05	57	1	-1	GO:0098916	other
locomotion	1023	702	GO:BP	1	-1	9.94022e-05	77	0.0022007	73	GO:0040011	other
regulation of programmed cell death	1243	702	GO:BP	1	-1	0.000129018	88	0.000518048	86	GO:0043067	regulation
response to endogenous stimulus	1410	702	GO:BP	1	-1	0.000167171	96	0.0347506	88	GO:0009719	response
neuron projection morphogenesis	566	702	GO:BP	1	-1	0.000210627	51	0.0235693	46	GO:0048812	other
negative regulation of cell communication	1206	702	GO:BP	1	-1	0.000307034	85	0.00122117	83	GO:0010648	regulation
negative regulation of signaling	1206	702	GO:BP	1	-1	0.000307034	85	0.00122117	83	GO:0023057	regulation
enzyme-linked receptor protein signaling pathway	832	702	GO:BP	1	-1	0.00048031	65	0.0121196	61	GO:0007167	other
programmed cell death	1651	702	GO:BP	1	-1	0.000550243	106	0.00179779	104	GO:0012501	other
growth	798	702	GO:BP	1	-1	0.000554799	63	1	-1	GO:0040007	other
cell motility	1404	702	GO:BP	1	-1	0.000572421	94	1	-1	GO:0048870	other
organic substance transport	2015	702	GO:BP	1	-1	0.000587781	123	1	-1	GO:0071702	other
cell death	1655	702	GO:BP	1	-1	0.000625404	106	0.00203299	104	GO:0008219	other
animal organ development	2400	702	GO:BP	1	-1	0.000825799	140	0.0116567	135	GO:0048513	other
positive regulation of macromolecule metabolic process	2806	702	GO:BP	1	-1	0.000854571	158	1.17022e-05	165	GO:0010604	metabolic & regulation
regulation of locomotion	883	702	GO:BP	1	-1	0.0008855	67	0.0422665	62	GO:0040012	regulation
regulation of cell migration	808	702	GO:BP	1	-1	0.000886701	63	0.0220606	59	GO:0030334	regulation
regulation of cell motility	847	702	GO:BP	1	-1	0.000954735	65	0.0480369	60	GO:2000145	regulation
regulation of molecular function	1547	702	GO:BP	1	-1	0.00109454	100	1	-1	GO:0065009	regulation
protein metabolic process	4131	702	GO:BP	1	-1	0.00116082	214	0.000559083	215	GO:0019538	metabolic
regulation of apoptotic process	1204	702	GO:BP	1	-1	0.00127791	83	0.00236235	82	GO:0042981	regulation
nervous system process	854	702	GO:BP	1	-1	0.00130552	65	1	-1	GO:0050877	other
cell morphogenesis involved in neuron differentiation	513	702	GO:BP	1	-1	0.0014364	46	1	-1	GO:0048667	other
negative regulation of programmed cell death	745	702	GO:BP	1	-1	0.00148981	59	0.000556901	60	GO:0043069	regulation
cellular localization	3013	702	GO:BP	1	-1	0.00150977	166	1	-1	GO:0051641	other
homeostatic process	1416	702	GO:BP	1	-1	0.00173803	93	8.65955e-05	97	GO:0042592	other
cell junction organization	659	702	GO:BP	1	-1	0.00191923	54	0.0105041	52	GO:0034330	other
regulation of cellular localization	886	702	GO:BP	1	-1	0.00229935	66	1	-1	GO:0060341	regulation
negative regulation of apoptotic process	720	702	GO:BP	1	-1	0.00261611	57	0.000982377	58	GO:0043066	regulation
actin filament-based process	706	702	GO:BP	1	-1	0.0032259	56	1	-1	GO:0030029	other
regulation of phosphate metabolic process	953	702	GO:BP	1	-1	0.00337197	69	1	-1	GO:0019220	metabolic & regulation
regulation of phosphorus metabolic process	954	702	GO:BP	1	-1	0.00351076	69	1	-1	GO:0051174	metabolic & regulation
regulation of metal ion transport	314	702	GO:BP	1	-1	0.0035738	33	1	-1	GO:0010959	regulation
positive regulation of transport	709	702	GO:BP	1	-1	0.00372045	56	1	-1	GO:0051050	regulation
protein phosphorylation	1135	702	GO:BP	1	-1	0.00400077	78	1	-1	GO:0006468	other
regulation of vesicle-mediated transport	465	702	GO:BP	1	-1	0.00475705	42	1	-1	GO:0060627	regulation
regulation of cell projection organization	605	702	GO:BP	1	-1	0.00478627	50	1	-1	GO:0031344	regulation
regulation of protein localization	792	702	GO:BP	1	-1	0.00544652	60	1	-1	GO:0032880	regulation
regulation of plasma membrane bounded cell projection organization	591	702	GO:BP	1	-1	0.00585314	49	1	-1	GO:0120035	regulation
macromolecule localization	2638	702	GO:BP	1	-1	0.00609769	147	1	-1	GO:0033036	other
nitrogen compound transport	1649	702	GO:BP	1	-1	0.00696028	102	1	-1	GO:0071705	other
apoptotic process	1590	702	GO:BP	1	-1	0.00802823	99	0.00706259	99	GO:0006915	other
negative regulation of response to stimulus	1410	702	GO:BP	1	-1	0.0107637	90	0.00955432	90	GO:0048585	regulation & response
cell-substrate adhesion	314	702	GO:BP	1	-1	0.0114177	32	1	-1	GO:0031589	other
regulation of monoatomic ion transport	379	702	GO:BP	1	-1	0.0117169	36	1	-1	GO:0043269	regulation
phosphorus metabolic process	2215	702	GO:BP	1	-1	0.0119418	127	1	-1	GO:0006793	metabolic
regulation of transmembrane transport	383	702	GO:BP	1	-1	0.015147	36	1	-1	GO:0034762	regulation
intracellular calcium ion homeostasis	257	702	GO:BP	1	-1	0.0167019	28	1	-1	GO:0006874	other
cellular macromolecule localization	2252	702	GO:BP	1	-1	0.0171189	128	1	-1	GO:0070727	other
positive regulation of protein modification process	650	702	GO:BP	1	-1	0.017774	51	0.0164017	51	GO:0031401	regulation
positive regulation of protein metabolic process	1059	702	GO:BP	1	-1	0.0198252	72	0.0179227	72	GO:0051247	metabolic & regulation
negative regulation of protein metabolic process	671	702	GO:BP	1	-1	0.0199175	52	1	-1	GO:0051248	metabolic & regulation
cellular homeostasis	690	702	GO:BP	1	-1	0.0202347	53	1	-1	GO:0019725	other
protein localization	2242	702	GO:BP	1	-1	0.0231333	127	1	-1	GO:0008104	other
calcium ion homeostasis	277	702	GO:BP	1	-1	0.0239652	29	1	-1	GO:0055074	other
developmental growth	566	702	GO:BP	1	-1	0.0253861	46	1	-1	GO:0048589	other
transmembrane receptor protein tyrosine kinase signaling pathway	533	702	GO:BP	1	-1	0.0295266	44	1	-1	GO:0007169	other
cellular response to endogenous stimulus	1214	702	GO:BP	1	-1	0.030269	79	1	-1	GO:0071495	response
negative regulation of signal transduction	1112	702	GO:BP	1	-1	0.0306964	74	0.027735	74	GO:0009968	regulation
MAPK cascade	625	702	GO:BP	1	-1	0.0310318	49	1	-1	GO:0000165	other
phosphate-containing compound metabolic process	2193	702	GO:BP	1	-1	0.0359345	124	1	-1	GO:0006796	metabolic
phosphorylation	1345	702	GO:BP	1	-1	0.036808	85	1	-1	GO:0016310	other
positive regulation of biosynthetic process	2195	702	GO:BP	1	-1	0.0376943	124	0.000588837	131	GO:0009891	regulation
positive regulation of cellular component organization	977	702	GO:BP	1	-1	0.0381102	67	1	-1	GO:0051130	regulation
positive regulation of molecular function	938	702	GO:BP	1	-1	0.0392931	65	1	-1	GO:0044093	regulation
positive regulation of cellular biosynthetic process	2177	702	GO:BP	1	-1	0.0419201	123	0.000656643	130	GO:0031328	regulation
chemical homeostasis	842	702	GO:BP	1	-1	0.0431617	60	1	-1	GO:0048878	other
protein modification process	2588	702	GO:BP	1	-1	0.0440709	141	0.0226303	142	GO:0036211	other
response to growth factor	616	702	GO:BP	1	-1	0.0482057	48	1	-1	GO:0070848	response
export from cell	748	702	GO:BP	1	-1	0.0482208	55	1	-1	GO:0140352	other
calcium ion transmembrane import into cytosol	167	702	GO:BP	1	-1	0.0485538	21	1	-1	GO:0097553	other
synapse	1318	702	GO:CC	1	-1	4.94712e-09	104	0.00179305	88	GO:0045202	other
plasma membrane region	1066	702	GO:CC	1	-1	1.11916e-07	87	0.000107847	79	GO:0098590	other
intracellular anatomical structure	12257	702	GO:CC	1	-1	1.09715e-06	533	1.53699e-07	535	GO:0005622	other
cell projection membrane	305	702	GO:CC	1	-1	1.07359e-05	37	0.00552193	32	GO:0031253	other
leading edge membrane	171	702	GO:CC	1	-1	4.40959e-05	26	1	-1	GO:0031256	other
main axon	64	702	GO:CC	1	-1	4.75208e-05	16	0.003244	14	GO:0044304	other
somatodendritic compartment	768	702	GO:CC	1	-1	0.000127199	63	1	-1	GO:0036477	other
cytoplasmic vesicle	2151	702	GO:CC	1	-1	0.000200292	131	1	-1	GO:0031410	other
intracellular vesicle	2156	702	GO:CC	1	-1	0.000231411	131	1	-1	GO:0097708	other
postsynapse	590	702	GO:CC	1	-1	0.000313554	52	1	-1	GO:0098794	other
transmembrane transporter complex	364	702	GO:CC	1	-1	0.000437248	38	1	-1	GO:1902495	other
cytosol	4762	702	GO:CC	1	-1	0.000445268	242	1	-1	GO:0005829	other
cell leading edge	399	702	GO:CC	1	-1	0.000560151	40	1	-1	GO:0031252	other
membrane protein complex	1085	702	GO:CC	1	-1	0.00128329	77	0.0011459	77	GO:0098796	other
synaptic membrane	348	702	GO:CC	1	-1	0.00136795	36	1	-1	GO:0097060	other
transporter complex	389	702	GO:CC	1	-1	0.00260305	38	1	-1	GO:1990351	other
presynapse	507	702	GO:CC	1	-1	0.0027547	45	1	-1	GO:0098793	other
secretory vesicle	876	702	GO:CC	1	-1	0.00338509	65	1	-1	GO:0099503	other
neuronal cell body	448	702	GO:CC	1	-1	0.00473933	41	1	-1	GO:0043025	other
dendrite	570	702	GO:CC	1	-1	0.00495514	48	1	-1	GO:0030425	other
dendritic tree	572	702	GO:CC	1	-1	0.0055072	48	1	-1	GO:0097447	other
postsynaptic membrane	240	702	GO:CC	1	-1	0.0142043	27	1	-1	GO:0045211	other
cell-substrate junction	400	702	GO:CC	1	-1	0.0154643	37	1	-1	GO:0030055	other
basal part of cell	261	702	GO:CC	1	-1	0.0229394	28	1	-1	GO:0045178	other
cell body	511	702	GO:CC	1	-1	0.0237512	43	1	-1	GO:0044297	other
organelle	11625	702	GO:CC	1	-1	0.0251552	491	0.00260588	495	GO:0043226	other
cell body membrane	29	702	GO:CC	1	-1	0.0314016	9	1	-1	GO:0044298	other
receptor complex	331	702	GO:CC	1	-1	0.0371868	32	1	-1	GO:0043235	other
inorganic cation transmembrane transporter activity	458	702	GO:MF	1	-1	2.95179e-08	52	3.76675e-05	46	GO:0022890	other
metal ion transmembrane transporter activity	362	702	GO:MF	1	-1	9.59256e-06	41	0.00350277	36	GO:0046873	other
anion binding	2125	702	GO:MF	1	-1	0.000330762	129	1	-1	GO:0043168	other
monoatomic cation channel activity	274	702	GO:MF	1	-1	0.000459537	32	0.00539747	30	GO:0005261	other
calcium ion transmembrane transporter activity	126	702	GO:MF	1	-1	0.00931796	19	1	-1	GO:0015085	other
enzyme binding	1855	702	GO:MF	1	-1	0.00983709	111	0.0277309	109	GO:0019899	other
small molecule binding	5335	702	GO:MF	1	-1	0.0114465	258	1	-1	GO:0036094	other
active monoatomic ion transmembrane transporter activity	191	702	GO:MF	1	-1	0.0324907	23	1	-1	GO:0022853	other
ion binding	5173	702	GO:MF	1	-1	0.033116	249	1	-1	GO:0043167	other
delayed rectifier potassium channel activity	22	702	GO:MF	1	-1	0.0336741	8	1	-1	GO:0005251	other
negative regulation of apoptotic signaling pathway	201	700	GO:BP	1	-1	1	-1	0.000319746	27	GO:2001234	regulation
defense response to virus	257	700	GO:BP	1	-1	1	-1	0.000341435	31	GO:0051607	response
positive regulation of nitrogen compound metabolic process	2492	700	GO:BP	1	-1	1	-1	0.00132439	143	GO:0051173	metabolic & regulation
positive regulation of macromolecule biosynthetic process	2114	700	GO:BP	1	-1	1	-1	0.00236102	125	GO:0010557	regulation
response to virus	335	700	GO:BP	1	-1	1	-1	0.00497074	34	GO:0009615	response
apoptotic signaling pathway	535	700	GO:BP	1	-1	1	-1	0.0120418	45	GO:0097190	other
response to abiotic stimulus	962	700	GO:BP	1	-1	1	-1	0.0199491	67	GO:0009628	response
regulation of metabolic process	5334	700	GO:BP	1	-1	1	-1	0.0308581	255	GO:0019222	metabolic & regulation
canonical NF-kappaB signal transduction	268	700	GO:BP	1	-1	1	-1	0.0372797	28	GO:0007249	other
positive regulation of canonical NF-kappaB signal transduction	180	700	GO:BP	1	-1	1	-1	0.0420735	22	GO:0043123	regulation
regulation of canonical NF-kappaB signal transduction	240	700	GO:BP	1	-1	1	-1	0.046397	26	GO:0043122	regulation
regulation of apoptotic signaling pathway	336	700	GO:BP	1	-1	1	-1	0.0488196	32	GO:2001233	regulation
intracellular monoatomic cation homeostasis	437	700	GO:BP	1	-1	1	-1	1	-1	GO:0030003	other
monoatomic ion homeostasis	508	700	GO:BP	1	-1	1	-1	1	-1	GO:0050801	other

## Sheet: legend
Supplemental Table S2: Effect of tissue-specific recalibration. Comparison of the Enrichment p-values and number of genes between nominal FC, mean-recalibration and BRNCTXB-recalibration based selection of the top 700 genes in the psychENCODE ASD DE experiment.
term_name	the short name of the function
term_size	number of genes associated with the GO term
query_size	number of genes that were included in the query (selected by TOP N from nominal fold change or recalibrated fold change, depending on set)
source	the abbreviation of the data source for the GO term (e.g. GO:BP)
p_value_fc	hypergeometric p-value after correction for multiple testing of the gene list selected by nominal fold changes
intersection_size_fc	the number of genes in the nominal FC input query that are annotated to the corresponding term
p_value_sdg_BRNCTXB	hypergeometric p-value after correction for multiple testing of the gene list selected by BRNCTXB recalibrated fold changes
intersection_size_sdg_BRNCTXB	the number of genes in the BRNCTXB recalibrated FC input query that are annotated to the corresponding term
p_value_sdg_MEAN	hypergeometric p-value after correction for multiple testing of the gene list selected by MEAN recalibrated fold changes
intersection_size_sdg_MEAN	the number of genes in the MEAN recalibrated FC input query that are annotated to the corresponding term
term_id	unique GO term identifier
classification	Group of GO terms this term was associated with (based on string matching)
