# Supplementary material for: Recalibrating differential gene expression by genetic dosage variance prioritizes functionally relevant genes
Source: Genome Res. 2025 Oct;35(10):2316–25. doi: 10.1101/gr.280360.124 (PMC12487816; doi:10.1101/gr.280360.124)
Supplement: Supplement 4 [file Supplemental_Table_S3.xlsx]

## Sheet: Supplemental Table S3
gene_id	ADPSBQ	ARTAORT	BLDDER	BRNAMY	BRNCHB	BRNHPP	BRNPTM	CLNSGM	ESPMSL	HRTAA	LCL	PNCREAS	SKINNS	SNTTRM	TESTIS	VAGINA	ADPVSC	ARTCRN	BREAST	BRNCDT	BRNCTXA	BRNHPT	BRNSNG	CLNTRN	ESPGEJ	FIBRBLS	HRTLV	LIVER	NERVET	PRSTTE	SKINS	SPLEEN	THYROID	WHLBLD	ADRNLG	ARTTBL	BRNACC	BRNCHA	BRNCTXB	BRNNCC	BRNSPC	ESPMCS	KDNCTX	LUNG	OVARY	PTTARY	SLVRYG	STMACH	UTERUS
ENSG00000227232	0.591959	0.570454	NA	0.545778	0.48473	0.567522	0.704379	0.862209	0.698337	0.737465	0.669428	0.661173	0.565015	0.757484	0.728967	0.40264	0.599542	0.856472	0.755454	0.432776	0.538822	0.512521	0.633992	0.721148	0.553934	0.51769	0.694623	0.575581	0.629331	0.638118	0.616665	0.598885	0.678079	0.740876	0.773127	0.706385	0.61704	0.52268	0.620426	0.597249	0.668931	0.671923	0.554649	0.758911	0.547268	0.624111	0.781936	0.693653	0.686357
ENSG00000268903	0.893867	0.893867	NA	0.893867	0.893867	NA	0.893867	0.893867	0.893867	0.893867	NA	0.634813	0.798637	0.893867	0.402871	0.893867	0.62153	0.893867	0.893867	NA	0.893867	0.717653	0.82984	0.893867	0.893867	NA	0.707186	0.893867	0.893867	0.893867	0.734535	0.393033	0.893867	0.893867	0.893867	0.893867	0.893867	0.893867	0.893867	0.893867	0.893867	0.667042	0.893867	0.441764	0.893867	0.893867	0.678824	0.893867	0.893867
ENSG00000279457	0.799917	NA	NA	NA	NA	NA	NA	NA	0.466877	NA	NA	NA	0.469679	NA	NA	NA	NA	NA	0.605468	NA	NA	NA	NA	0.531369	0.893867	NA	NA	NA	0.626234	0.361277	0.50157	0.656172	0.629392	0.429272	NA	0.354925	NA	NA	NA	NA	NA	0.50831	NA	0.314741	NA	NA	NA	NA	NA
ENSG00000230021	0.893867	0.640663	0.487686	0.893867	0.893867	0.893867	0.893867	0.893867	0.893867	0.893867	0.662878	0.893867	0.893867	0.893867	0.784613	0.434331	0.893867	0.893867	0.893867	NA	0.893867	0.893867	0.893867	0.893867	0.893867	0.857723	0.893867	NA	0.583031	0.893867	0.893867	0.893867	0.893867	0.893867	0.893867	0.738609	0.893867	0.893867	0.893867	0.893867	0.893867	0.893867	0.893867	0.893867	0.243212	0.802768	0.893867	0.893867	0.359241
ENSG00000237973	0.893867	0.893867	NA	NA	0.893867	NA	0.893867	0.893867	0.893867	0.893867	NA	NA	0.893867	NA	0.893867	NA	0.893867	NA	0.893867	0.893867	0.893867	0.893867	NA	0.893867	0.893867	NA	0.893867	0.893867	NA	0.893867	0.893867	NA	0.893867	NA	0.893867	0.893867	NA	0.893867	NA	0.893867	NA	0.893867	NA	0.893867	NA	NA	NA	0.893867	NA
ENSG00000229344	0.893867	NA	NA	0.893867	0.893867	0.893867	0.893867	0.893867	0.893867	0.893867	0.893867	0.893867	0.893867	0.893867	0.893867	NA	0.893867	NA	0.893867	0.893867	0.893867	0.893867	0.893867	0.893867	0.893867	0.893867	0.893867	0.893867	0.893867	0.893867	0.893867	0.893867	0.893867	0.893867	0.893867	0.893867	0.893867	0.893867	0.893867	0.893867	0.893867	0.893867	0.893867	0.893867	NA	0.893867	0.893867	0.893867	NA
ENSG00000198744	0.893867	NA	NA	0.893867	0.893867	0.893867	0.893867	0.893867	0.893867	0.893867	NA	NA	0.893867	0.893867	0.893867	NA	0.893867	NA	0.893867	0.893867	0.893867	0.893867	0.893867	0.893867	0.893867	NA	0.893867	0.893867	NA	0.893867	0.893867	NA	0.893867	NA	0.893867	0.893867	0.893867	0.893867	0.893867	0.893867	0.893867	0.893867	0.893867	0.893867	NA	NA	NA	0.893867	NA
ENSG00000228327	0.143391	NA	NA	NA	NA	NA	NA	NA	0.104538	NA	0.0866334	NA	0.0956998	0.0825583	0.111771	NA	0.0931196	NA	0.0922859	NA	NA	NA	NA	0.0990194	0.109406	0.0891177	NA	NA	0.0830542	0.129643	0.165685	0.132385	0.0932531	NA	NA	0.116908	NA	NA	NA	NA	NA	NA	NA	0.10967	0.0990806	0.142384	NA	NA	NA
ENSG00000237491	0.0776387	0.108148	NA	NA	0.057972	0.0106501	0.0605012	0.041844	0.0647242	0.0436967	0.0380776	0.0593092	0.0630653	0.0529197	0.0801109	0.0348253	0.068527	0.10464	0.0588476	0.117092	0.134796	0.0319599	NA	0.0738373	0.0591449	0.0673456	0.0406507	0.158269	0.0760893	0.042156	0.0781074	0.0513296	0.0427709	0.12099	0.0288398	0.124451	0.068938	0.0772075	0.0706659	0.0627464	0.0530773	0.0510681	NA	0.100668	0.0368546	0.0915627	0.0494423	0.0400756	0.0297319
ENSG00000230092	0.101056	NA	NA	NA	0.0851737	NA	NA	NA	0.0649323	NA	0.0375635	NA	0.0733703	0.109499	0.109166	NA	NA	0.0705105	0.0562468	NA	NA	NA	NA	0.0559593	0.0625898	NA	NA	NA	0.10438	0.10805	0.112267	0.0467327	0.0548875	NA	NA	0.0933371	NA	0.0965196	NA	0.135206	NA	0.0665876	NA	0.132232	0.04293	0.0735265	0.0664331	NA	0.0440344
ENSG00000177757	0.0793424	NA	NA	NA	NA	NA	NA	NA	NA	NA	NA	NA	0.051951	NA	0.0214525	NA	0.0898261	NA	0.0413111	NA	NA	NA	NA	NA	NA	0.0236739	NA	NA	0.0475744	NA	0.0643059	NA	0.0470219	NA	0.0531553	0.100092	NA	0.0504279	NA	NA	NA	NA	NA	NA	NA	NA	NA	NA	NA
ENSG00000228794	0.0395124	0.0391999	0.0582226	0.02996	0.0773264	0.0342642	0.0266178	0.021178	0.029354	0.018931	0.0344516	0.0485312	0.0196698	0.00802399	0.0395324	0.0677349	0.0158365	0.0578861	0.0235869	0.032496	0.00923758	0.00432464	0.00503742	0.0381988	0.0261196	0.0138838	0.014917	0.0741163	0.0567594	0.0512549	0.0271248	0.042521	0.0375273	0.0327343	0.0215543	0.035662	0.016634	0.0812635	0.00816902	0.032476	0.088428	0.0244174	0.0788528	0.0311936	0.0440044	0.0432383	0.0215418	0.0281399	0.0589575
ENSG00000225880	0.0522503	0.0471765	NA	NA	0.102537	NA	NA	0.043629	0.0575593	0.0473944	0.0620945	0.0385063	0.042683	0.0129996	0.0247009	0.0525714	0.0368679	0.0823945	0.038899	0.0741977	0.0709532	NA	NA	0.0534607	0.0459347	0.0342395	0.0701469	0.0631741	0.0363402	0.0575001	0.0571876	0.0745033	0.037568	0.053828	0.0372992	0.0453903	NA	0.0544171	NA	0.0429957	0.0336065	0.0504928	0.0416596	0.0528612	0.0486872	0.0464476	0.0225036	0.0741542	0.0881352
ENSG00000223764	0.0570125	0.0267273	0.0100305	NA	NA	NA	NA	0.0312519	0.083242	0.00577307	NA	0.0197964	0.12268	0.0238797	0.0200928	0.0184963	0.0563283	0.0286226	0.0321677	NA	NA	0.0847495	NA	0.0110318	0.0623059	0.0239231	2.54197e-05	0.021743	0.0468148	0.0148848	0.160017	0.0050115	0.0297795	NA	0.00360658	0.0179841	NA	NA	NA	NA	0.0684683	0.0586296	0.00852253	0.0102971	0.022257	0.0061173	0.069062	0.0341616	0.0490056
ENSG00000188976	0.00979221	0.00838132	0.0131062	0.014652	0.00615203	0.016738	0.0102793	0.00836558	0.00936197	0.00893025	0.00463926	0.0115767	0.0117304	0.00512016	0.00431199	0.00552834	0.00908124	0.00946871	0.0118613	0.00789258	0.00940976	0.00941083	0.0129116	0.00807689	0.00669279	0.00510653	0.00893629	0.0130701	0.011248	0.00735499	0.0107913	0.0108629	0.0133617	0.0104235	0.00887198	0.00823732	0.0119402	0.00531325	0.00889867	0.00780613	0.0184252	0.00930303	0.00341966	0.00875206	0.00947938	0.00829723	0.0114751	0.00857571	0.0104307
ENSG00000187961	0.0130986	0.00249747	0.0307431	0.0103576	0.0021329	0.0141246	0.0169883	0.013268	0.0109548	0.00510558	0.0145396	0.00649804	0.0123198	0.00190397	0.00853741	0.0114651	0.0126006	0.0120147	0.0150116	0.0195563	0.0070806	0.0155462	0.0112923	0.00801096	0.00459311	0.00974215	0.000953936	0.000556103	0.00945852	0.00976428	0.019019	0.00454848	0.00605648	0.0302731	0.0116914	0.0137312	0.0178497	0.00420526	0.00749649	0.00404005	0.0192351	0.0149418	0.00470657	0.00956165	0.0208844	0.00483954	0.00466921	0.0121175	0.00990123
ENSG00000187642	0.144459	NA	NA	NA	NA	NA	NA	NA	NA	0.0240794	NA	NA	0.0119102	NA	0.435303	0.0122249	NA	0.106995	0.0776864	NA	NA	NA	NA	NA	NA	NA	0.0153903	NA	NA	0.138274	0.00992449	NA	NA	0.0551633	NA	0.127259	NA	NA	NA	NA	NA	0.0424145	NA	NA	NA	NA	0.00824569	NA	NA
ENSG00000272512	0.372539	0.7435	0.383963	0.185778	NA	0.2339	0.297408	0.492889	0.503433	0.151618	NA	0.454338	0.44488	NA	NA	0.415412	0.267595	0.429223	0.399708	0.400424	0.283647	0.217044	0.162241	0.524724	0.505685	NA	0.0921027	NA	0.321334	0.557526	0.394487	0.641151	0.495052	NA	NA	0.326423	0.3948	NA	0.247891	0.319291	NA	0.311733	NA	0.564597	NA	0.382457	NA	NA	0.556059
ENSG00000188290	0.506826	0.565381	NA	0.809508	NA	0.562365	0.571079	0.642155	0.659231	0.489496	NA	0.566147	0.588395	0.599603	0.238667	0.458886	0.556484	0.513948	0.638407	0.527959	0.453396	0.450415	0.729001	0.504049	0.680259	NA	0.467298	NA	0.557733	0.528505	0.55068	0.490528	0.431981	0.65603	NA	0.470935	0.710453	NA	0.440222	0.558551	NA	0.670057	NA	0.467516	0.647367	0.624481	0.45332	0.535321	0.703988
ENSG00000187608	0.0124804	0.00880194	0.0690791	0.00960894	0.00294483	0.0132379	0.00648885	0.0108835	0.00777016	0.00616293	0.0114873	0.0300695	0.0129762	0.0483947	0.00921149	0.0109118	0.0104249	0.0118337	0.0117222	0.0109914	0.00689931	0.00448187	0.00659349	0.0150695	0.00869863	0.0329916	0.00847689	0.0120472	0.00974262	0.0123935	0.0192817	0.0304169	0.00850935	0.0932853	0.0120266	0.0105786	0.0134834	0.013972	0.00997404	0.00703034	0.00334645	0.00858978	0.00958167	0.00867796	0.0115414	0.0112409	0.0154634	0.0143791	0.0148733
ENSG00000188157	0.0117787	0.0117371	0.00444891	0.0049174	0.0088364	0.00441523	0.00507348	0.0116397	0.013604	0.0125002	0.0069322	0.00351885	0.00417089	0.00540084	0.00161187	0.00651921	0.0181901	0.0140364	0.00959834	0.00279963	0.00172722	0.00398047	0.00606043	0.00820077	0.0123233	0.0156826	0.0111048	0.00780872	0.00760282	0.00475936	0.00398148	0.0142375	0.00448675	0.0339073	0.0164898	0.0130485	0.00242925	0.00459604	0.00154913	0.00346912	0.00712	0.00271798	0.0036986	0.00478886	0.00943402	0.00701086	0.00291371	0.0078763	0.0100865
ENSG00000131591	0.00548113	0.0100852	0.0169558	0.0216618	0.014481	0.020364	0.0184511	0.00845375	0.00736593	0.0122446	0.00477281	0.0149326	0.00738506	0.0047195	0.00301706	0.00640614	0.00981954	0.0104227	0.00786087	0.0254541	0.0153519	0.0128082	0.0110461	0.00565	0.0117398	0.00743161	0.0107364	0.0049981	0.00940571	0.00661374	0.00660587	0.00729388	0.0115628	0.0114292	0.00772774	0.00818071	0.0171924	0.0188632	0.0244765	0.0348026	0.0136599	0.00689558	0.00968369	0.00746116	0.0172123	0.0151344	0.00604797	0.00689708	0.00977352
ENSG00000205231	0.0728164	NA	NA	NA	NA	NA	NA	NA	NA	NA	NA	NA	NA	NA	0.00547887	NA	0.0404096	NA	0.0457048	0.680831	NA	NA	NA	NA	NA	NA	NA	NA	NA	NA	NA	NA	NA	NA	NA	NA	NA	NA	NA	NA	NA	NA	NA	0.0699211	NA	0.208835	NA	NA	NA
ENSG00000162571	0.028944	NA	NA	NA	NA	NA	NA	NA	NA	NA	NA	NA	0.0406617	NA	0.00781599	NA	0.015163	NA	0.0168973	0.186899	NA	0.0709834	NA	0.0691705	NA	NA	NA	NA	NA	NA	0.0837473	NA	NA	NA	NA	NA	NA	NA	NA	NA	NA	0.12061	NA	0.0158784	NA	0.049449	NA	NA	NA
ENSG00000186891	0.241718	NA	NA	NA	0.224254	NA	NA	NA	NA	NA	0.102477	NA	0.0239751	0.0791953	0.0608566	NA	NA	NA	0.103229	NA	NA	NA	NA	0.0325576	NA	NA	NA	NA	NA	0.15461	0.0395703	0.105846	0.115803	0.128529	NA	NA	NA	0.152599	NA	NA	NA	0.0791092	NA	0.0853789	NA	0.0450149	0.0234083	0.0517411	NA
ENSG00000186827	0.0111049	NA	NA	NA	NA	NA	NA	NA	NA	0.0062048	0.0512412	NA	NA	0.0029522	NA	NA	0.0132278	0.0230357	0.0158686	NA	NA	NA	NA	0.00600245	NA	NA	0.00844078	NA	NA	0.0172646	NA	0.00268281	0.0128384	0.0298754	NA	0.0486601	NA	NA	NA	NA	NA	NA	NA	0.0226872	NA	2.54197e-05	NA	0.0318553	NA
ENSG00000078808	0.00366202	0.00909522	0.00240036	0.000243223	0.00695947	0.00473741	0.00403456	0.00371867	0.00300576	0.00402929	0.00321664	0.0038931	0.00315272	0.00273083	0.00293485	0.0047886	0.004677	0.00482364	0.00294094	0.00199839	0.0109526	0.00215727	0.00234438	0.00297154	0.00367616	0.0040696	0.00304926	0.00245866	0.00439953	0.00291563	0.00248757	0.00366495	0.00275524	0.00491013	0.00375642	0.00432609	0.00736727	0.00835582	0.0083701	0.00612827	0.00209519	0.00217508	0.00147133	0.00312414	0.00538834	0.00223263	0.00712437	0.00310319	0.00453537
ENSG00000176022	0.0317296	0.017472	NA	0.0216137	0.0290326	0.020661	0.0258842	0.0102867	0.0196656	0.0143153	0.019912	0.01551	0.0240514	0.0258167	0.0188941	0.00908054	0.0117627	0.01653	0.0209345	0.0216544	0.00968906	0.0246585	0.0103406	0.0277974	0.0170317	0.0151114	0.0175962	0.00781279	0.0552737	0.0234907	0.0328311	0.0120662	0.0193699	0.0333882	2.54197e-05	0.0202849	0.0178358	0.0610743	0.00962975	0.0122958	0.0501288	0.0157942	0.0263442	0.0175737	0.0116575	0.00730998	0.0117749	0.0222853	0.0242242
ENSG00000184163	0.0182389	0.0176253	NA	NA	0.00991551	NA	NA	0.0361576	0.0388052	NA	0.00353301	NA	0.0376171	0.0122064	0.0279534	2.54197e-05	0.088343	0.0346858	0.0336156	NA	0.0356353	0.0128918	NA	0.0151884	0.0199695	2.54197e-05	0.11768	0.0323762	0.00778778	0.0233629	0.0154069	0.0282712	0.0231865	0.0117695	NA	0.0228988	NA	0.000344674	NA	0.0390917	NA	0.0341186	0.00963039	0.0173502	0.030432	0.0642693	NA	0.0264124	2.54197e-05
ENSG00000160087	0.00690593	0.0101525	2.54197e-05	0.00111259	0.00267265	0.0093224	0.00386408	0.00301007	0.00454538	0.00151418	0.0031068	0.00574646	0.00516324	0.00682877	0.00478275	0.00318354	0.00542292	0.00463409	0.00837501	0.00739388	0.000835455	0.00230909	2.54197e-05	0.00569248	0.0033938	0.00340281	0.00367183	0.00960868	0.00566259	0.00483712	0.0128365	0.00619203	0.00659707	0.0157192	0.00595284	0.00903626	0.000528306	0.00364678	0.00115455	0.00693182	0.000653036	0.00868206	0.0311746	0.00772712	0.00644595	0.00513108	0.0023296	0.00578823	0.0142306
ENSG00000230415	0.0153543	0.0242306	NA	0.0287996	0.0110645	0.0205413	0.0268126	0.0171251	0.0329317	0.00588554	NA	0.0139718	0.0872528	0.0316443	0.00732777	0.0382485	0.033611	0.0280201	0.032195	0.00397506	0.0330601	0.0216795	NA	0.015696	0.014118	0.0341425	0.0170021	0.0420345	0.0272915	0.0383012	0.0791165	0.0298926	0.00317801	NA	0.00959444	0.0635969	0.0355957	0.0160288	0.0149647	0.0182204	0.028451	0.0222011	NA	0.0201783	0.0117224	0.0207613	0.0317898	0.0272733	0.0212512
ENSG00000162572	0.0190041	0.0368069	0.018096	0.0166862	0.0158913	0.0124061	0.010356	0.0535893	0.0358498	0.0420648	0.0198308	0.0226883	0.0548823	0.0295223	0.00916635	0.0278479	0.0314125	0.0189428	0.0256821	0.0135031	0.0173052	0.0155179	0.0143384	0.0330322	0.0241381	0.00933574	0.0268007	0.0389464	0.0217287	0.0363995	0.0413281	0.0236843	0.0347397	0.0572166	0.0178038	0.0625031	0.01921	0.0303007	0.011489	0.0163246	0.0295417	0.0499474	0.0449248	0.0360515	0.0200095	0.0192895	0.033243	0.029229	0.0397534
ENSG00000131584	0.00637526	0.00984944	0.00186956	0.00253143	0.00181307	0.0038931	0.00576849	0.00484927	0.00639023	0.013508	0.0251465	0.00698161	0.00328453	0.00388173	0.00519102	0.0037023	0.00528989	0.00691835	0.00416562	0.00392558	0.00422524	0.00424496	0.00363308	0.00566579	0.0052083	0.00715894	0.0108306	0.0141489	0.00371075	0.00830811	0.00287603	0.0088398	0.00693209	0.00590076	0.00997013	0.0135353	0.00320983	0.00264689	0.00135146	0.00380979	0.00459009	0.00487976	0.00631065	0.00592539	0.00367553	0.00299897	0.00345826	0.00571517	0.00443544
ENSG00000169972	0.0315016	0.0214138	NA	0.0381483	0.0103173	0.00680768	0.0207134	0.0118397	0.0165291	0.0103504	0.00564161	0.0222675	0.0216591	0.00798993	0.00830688	0.00662072	0.00807014	0.0279	0.0132438	0.0651759	0.00998309	0.0118181	0.0172977	0.00625341	0.00150283	0.00540716	0.0139779	0.0460407	0.0229095	0.0186679	0.0322997	0.00941267	0.0130259	0.0126911	0.0136403	0.00662237	2.54197e-05	0.0353204	0.00778771	0.0439915	NA	0.00551379	0.0133803	0.0119179	0.0223148	0.0398414	0.0150018	0.0101828	0.0113885
ENSG00000127054	0.0109676	0.0183113	0.0201553	0.00803278	0.0141727	0.0119537	0.00718339	0.0203334	0.0159134	0.00923269	0.00638485	0.0110398	0.00830459	0.0100631	0.0124017	0.0131109	0.00998166	0.0167461	0.00797388	0.00949641	0.00821155	0.00862958	0.0102739	0.0116153	0.0158943	0.00912063	0.00917099	0.0143912	0.00902142	0.0109607	0.00765198	0.0121738	0.00886725	0.00968559	0.0114185	0.0215917	0.0109717	0.0131795	0.0075475	0.00931014	0.00864281	0.00741924	0.00969936	0.010262	0.0119721	0.00745315	0.00684807	0.0116892	0.0172536
ENSG00000240731	0.0283149	0.0567709	NA	NA	0.0144414	NA	NA	0.0553161	0.0527621	0.0195672	NA	0.00613155	0.0187182	0.0326671	0.0136864	0.034675	0.0427592	0.0365103	0.0147673	NA	0.0320738	2.54197e-05	NA	0.0404507	0.0537393	0.0079833	0.0352942	NA	0.0220651	0.0399997	0.038541	0.0274809	0.012381	NA	0.0251816	0.171288	NA	0.0175251	0.0250968	0.0205235	NA	0.0115049	NA	0.0183395	0.00205998	2.54197e-05	0.0341246	0.0410235	0.0158293
ENSG00000224051	0.00596345	0.00676782	NA	0.000247807	0.00474056	0.00302538	0.00553239	0.00636608	0.00504233	0.00215134	0.00882415	0.00679708	0.00401627	0.00433494	0.00690167	0.00507521	0.00570883	0.006098	0.00395305	0.00312364	0.00294213	0.00603091	0.00734491	0.00487516	0.00313156	0.00813528	0.00138845	0.00624631	0.0078747	0.00497026	0.003674	0.00471606	0.00467975	0.0096676	0.00810565	0.00720196	2.54197e-05	0.00529874	0.00105814	0.00566159	0.00915518	0.00225375	2.54197e-05	0.00414564	0.00884951	0.00716379	0.00310414	0.00348731	0.00380874
ENSG00000107404	0.00658973	0.00723902	NA	0.00166042	0.00234313	0.0031712	0.00202959	0.00832353	0.00544959	0.00427086	0.00640334	0.00538545	0.00538312	0.00527498	0.003617	0.00349403	0.00345053	0.00436304	0.00347663	0.00257283	0.0024852	0.00240858	2.54197e-05	0.00646738	0.00402963	0.00318278	0.00527835	0.00492162	0.00449148	0.00444409	0.00410896	0.00623173	0.00380198	0.00422444	0.00559665	0.0050848	0.00211437	0.00429996	0.00500537	0.0014826	0.00222657	0.00386921	0.0061456	0.00566237	0.00250593	0.00579406	0.00851152	0.00644356	0.00316566
ENSG00000162576	0.0020125	0.00702892	NA	0.0220336	0.021681	0.0374645	0.00449452	0.00878859	0.00704755	0.00891036	0.0758621	0.00847957	0.00420679	0.00521886	0.0050732	0.00866044	0.00177799	0.00365226	0.00987233	0.00904734	0.0247379	0.00791904	0.00951148	0.0047508	0.00814912	0.00439305	0.00680292	0.0301758	0.00553871	0.00611734	0.00470547	0.00802931	0.00697809	0.0284039	0.0168716	0.00560927	0.0241714	0.0106729	0.0283111	0.00654628	0.0101006	0.042507	0.00367941	0.00239025	0.00840492	0.00416301	0.00475978	0.00803533	0.00373549
ENSG00000175756	0.0743758	0.0607307	NA	0.13576	0.0547635	0.0763735	0.129128	0.0955234	0.0706563	0.103756	0.0290591	0.0513756	0.103065	0.0509973	0.0540297	0.0715506	0.05207	0.0559214	0.0650303	0.122127	0.156229	0.169321	0.198232	0.044942	0.0878307	0.0530908	0.0942783	0.0797241	0.102888	0.0839449	0.102639	0.0289916	0.05087	0.0119158	0.0780365	0.0733856	0.105207	0.0734773	0.103109	0.122093	0.133998	0.0397375	0.0627789	0.0323455	0.0392638	0.0645423	0.051426	0.027095	0.0774027
ENSG00000221978	0.00412933	0.0034637	2.54197e-05	0.000603372	0.00435599	0.00239935	0.00431337	0.0024256	0.0018608	0.00419299	0.000777882	0.00766034	0.00234163	0.000945206	0.00348344	0.00344682	0.00115188	0.00422437	0.00229741	0.0054861	0.00438712	0.0106055	0.00964159	0.00206596	0.00163451	0.0012955	0.0024579	0.00292223	0.00294271	0.00486997	0.00434576	0.00262035	0.00231275	0.00534358	0.00348853	0.00380965	0.00409975	0.00273011	0.00839768	0.00296259	0.0053037	0.00208112	2.54197e-05	0.00271445	0.00119782	0.0029969	0.00247148	0.00367625	0.00258315
ENSG00000224870	0.0120627	0.0146526	NA	0.00748341	0.00810898	0.0145381	2.54197e-05	0.00994693	0.00724882	0.00836928	0.00907057	0.0108753	0.0050553	0.0053148	0.00257284	0.00538059	0.00950895	0.0151447	0.00609082	0.00686209	0.00469658	0.00517255	0.00723405	0.00448308	0.00767149	0.00419875	0.0234188	0.0252113	0.00315348	0.0162122	0.0158141	0.00781503	0.00539292	0.0154102	0.00543238	0.00878517	0.00454983	0.00366216	0.015149	0.00392926	0.00446003	0.00872804	0.00435386	0.0145266	0.00138634	0.00263292	0.000862601	0.0106068	0.00211551
ENSG00000242485	0.00270385	0.00239142	NA	0.00380969	0.00439544	0.00560364	0.00428023	0.00226193	0.00298479	0.00195851	0.00445524	0.00345927	0.00361309	0.00193521	0.00395965	0.00125642	0.0026723	0.00135974	0.00478172	0.00458704	0.00211073	0.00369148	0.00674235	0.00137188	0.00343108	0.00122493	0.00205727	0.00253604	0.00427196	0.00448761	0.00358806	0.00325571	0.00236575	0.0108164	0.00179144	0.00262745	0.00168985	0.00408433	0.00434958	0.00141514	0.00465726	0.00382414	0.00269688	0.00174365	0.00608939	0.00275987	0.00153262	0.00244858	0.00503542
ENSG00000235098	0.893867	NA	0.0567608	0.226613	0.893867	0.164184	0.19227	0.522384	0.68878	0.628057	NA	0.454822	0.727252	0.306429	0.041935	0.245198	0.893867	0.768575	0.28739	0.297008	0.679332	0.211839	0.149875	0.423678	0.763842	NA	NA	NA	0.2385	0.106327	0.893867	NA	0.200917	NA	NA	NA	0.476041	0.893867	0.625939	0.491278	0.0753116	0.0592437	NA	0.0822441	0.756591	NA	0.136986	0.642437	0.893867
ENSG00000225285	0.0356311	NA	NA	NA	NA	NA	NA	0.0101848	0.0121608	NA	NA	0.00413239	NA	0.0255043	0.0118316	0.0186399	0.019241	NA	0.0122298	NA	NA	NA	NA	0.0179987	0.00596124	NA	NA	0.0432373	0.0115337	0.00442211	NA	NA	NA	NA	NA	0.0646385	NA	NA	NA	NA	NA	0.0227412	NA	0.0136525	NA	2.54197e-05	0.00372036	0.00657637	0.0220964
ENSG00000179403	0.00561565	0.0199626	2.54197e-05	0.00615456	0.0201913	0.00387967	0.00134544	0.00251802	0.00180574	0.00315024	0.104735	0.00676856	0.00397455	0.000915776	0.00232908	0.00416422	0.00635546	0.00557904	0.00367696	0.00581067	0.00539647	0.00429453	0.00667645	0.00336558	0.002588	0.0261479	0.00260177	0.00544839	0.00198477	0.00377917	0.00413263	0.00588385	0.00215083	NA	0.0053457	0.00883206	0.00492822	0.0117375	0.00692558	0.00558664	0.00588909	0.00518114	0.00112817	0.00274118	0.000792683	0.00841075	0.00221745	0.00367495	0.00518576
ENSG00000215915	0.505977	NA	0.00479521	0.0966764	NA	0.415833	0.350818	0.315532	0.274919	NA	NA	0.165745	0.24517	NA	0.104958	0.261485	0.146128	0.492579	0.245514	0.282071	0.448438	0.411691	0.75873	0.221069	0.173968	NA	NA	0.394189	0.437176	0.23341	0.179451	NA	0.210123	NA	NA	NA	0.314974	NA	0.645965	0.293109	0.558507	0.190355	0.110983	0.131374	0.149734	0.244942	0.216591	0.251747	0.211443
ENSG00000160072	0.0337374	0.0270828	0.00342603	0.0308495	0.0479373	0.0429695	0.0213843	0.0318409	0.0238813	0.0320923	0.0324272	0.0224801	0.0326324	0.0148256	0.013106	0.0276603	0.0505499	0.0202869	0.0446615	0.0324823	0.0463807	0.0138574	0.0242862	0.0286338	0.0262401	0.0415462	0.0370508	0.0274172	0.0318617	0.0265095	0.0348596	0.0270391	0.0376689	0.0484029	0.0156621	0.0292947	0.0188944	0.065564	0.0255915	0.0393553	0.0574529	0.0260509	0.027403	0.0334603	0.0576212	0.046819	0.0195151	0.0224777	0.0478604
ENSG00000197785	0.134738	0.141794	0.159771	0.172297	0.132838	0.142745	0.131559	0.125723	0.144938	0.151561	0.13529	0.130025	0.137965	0.134366	0.155281	0.146959	0.151742	0.164266	0.148184	0.133983	0.152571	0.135971	0.110578	0.143649	0.133993	0.156615	0.180166	0.17509	0.13459	0.147765	0.140397	0.128962	0.120773	0.123295	0.144028	0.137437	0.157501	0.115194	0.147222	0.148954	0.155418	0.135988	0.148461	0.148051	0.131273	0.116479	0.118728	0.141532	0.139109
ENSG00000205090	0.0440912	0.0235133	NA	0.0157018	0.00409208	0.029057	2.54197e-05	0.00251571	0.00785382	NA	NA	NA	NA	NA	NA	2.54197e-05	NA	0.0316947	NA	0.00504465	0.00607266	0.00343454	0.0163698	0.00752595	0.0162049	NA	0.0343813	NA	0.0213022	0.013737	NA	NA	0.0387201	NA	NA	0.0291094	0.00385805	0.00190885	0.00864721	0.00631613	NA	NA	NA	NA	0.0120376	0.0116148	NA	0.034314	2.54197e-05
ENSG00000160075	0.000856155	0.000975394	6.92433e-05	0.0025684	0.000994931	0.00269936	0.0010714	0.000622677	0.000423765	0.000668026	0.00180755	0.00255099	0.00128336	0.00177766	0.00426901	0.000484516	0.000596437	0.00151426	0.000881543	0.00107563	0.000641816	7.55797e-05	0.000774568	0.000513057	0.000889036	0.00103964	0.000679832	0.00366179	0.00155805	0.00126662	0.00113085	0.00108034	0.000855577	0.00178494	0.0021138	0.00159068	0.000694652	0.000775328	0.000537224	0.000304208	0.0016304	0.000893496	0.00121806	0.00171595	0.000523242	0.00173478	0.00104239	0.0016003	0.000357466
ENSG00000272106	0.0217387	0.0155012	0.00160916	0.0309551	0.0139759	0.0292475	0.0217431	0.0169993	0.0118747	0.0350969	0.00733058	0.0422179	0.00673685	0.00703369	0.0159511	0.0187218	0.0261076	0.0141208	0.0254534	0.0193525	0.0208557	0.0206965	0.0261381	0.0170354	0.020629	0.0175485	0.0381416	0.0246351	0.0149997	0.0136645	0.0123503	0.00935002	0.0144276	0.0453756	0.0126703	0.0130756	0.0265361	0.0118534	0.0166176	0.0159055	0.0271889	0.00926798	0.0198618	0.00756643	0.0136946	0.014533	0.011031	0.0191954	0.0127087
ENSG00000197530	0.00308199	0.00404043	0.0015941	0.000591627	0.00217424	0.00415436	0.00197634	0.0026571	0.00210583	0.00245071	0.00674829	0.00297993	0.00176528	0.00614947	0.00137004	0.00212998	0.00276455	0.00466646	0.00285324	0.00318137	0.000804983	0.0041387	0.00387513	0.00238604	0.00301642	0.00172886	0.00232158	0.00200146	0.00330537	0.00283966	0.00264485	0.00681853	0.00154045	0.0130113	0.00254143	0.00448896	0.0010176	0.00260232	2.54197e-05	0.00136264	0.00314531	0.00220763	0.000630179	0.00262387	0.00300072	0.00272389	0.00259063	0.00312885	0.0056226
ENSG00000248333	0.0888291	0.0858335	NA	0.241547	0.0635066	0.0538148	0.0559494	0.0877525	0.0793313	0.0519251	0.0729559	0.0897181	0.0898549	0.108642	0.0743441	0.0646343	0.078782	0.0950635	0.0870712	0.109014	0.0714231	0.106725	0.0249546	0.0780535	0.0829497	0.150549	0.0832543	0.0708323	0.0649335	0.10241	0.0862021	0.061863	0.0694015	0.089423	0.106217	0.0985653	0.135036	0.0638984	0.0991931	0.0618478	0.0924626	0.0905353	0.109754	0.0940375	0.103623	0.0779479	0.157489	0.0772333	0.0477793
ENSG00000189339	0.0996766	0.122438	0.122654	0.0806289	0.11599	0.107323	0.0845604	0.125593	0.136511	0.0872203	0.127331	0.105788	0.0987912	0.109932	0.0851752	0.11505	0.136057	0.112975	0.11808	0.0885286	0.10693	0.0854502	0.125792	0.104912	0.138596	0.139885	0.10019	0.180793	0.103303	0.0948715	0.0927559	0.107339	0.101204	0.126388	0.12559	0.107678	0.086921	0.101094	0.0991512	0.0760885	0.0880578	0.125192	0.149038	0.112452	0.119906	0.0988816	0.0697896	0.114928	0.10431
ENSG00000269737	0.131279	0.134922	NA	NA	0.0625003	NA	NA	0.118335	0.110782	NA	0.042301	0.166792	0.147866	0.0877149	0.0705136	0.0526534	0.17508	0.162474	0.140628	NA	NA	NA	NA	0.0996061	0.133088	NA	NA	NA	0.0887285	0.0938161	0.157652	0.142491	0.1222	0.23078	NA	0.166101	NA	0.0587855	NA	NA	NA	0.156696	NA	0.146564	0.0674919	0.115065	0.0962535	0.155726	0.0974947
ENSG00000008128	0.0906195	0.100674	0.0580415	0.116731	0.0895512	0.102422	0.134495	0.122911	0.119925	0.0884722	0.12589	0.0635747	0.0899924	0.0735993	0.104315	0.0732454	0.0943136	0.0801234	0.0767526	0.109369	0.104306	0.112518	0.109112	0.0853909	0.110596	0.152516	0.0863165	0.0501367	0.0993517	0.0785385	0.0903154	0.0654082	0.0794938	0.107519	0.0809945	0.110037	0.170358	0.0779691	0.122229	0.120149	0.102624	0.0878676	0.0694122	0.058402	0.0847491	0.0677384	0.0806446	0.0714186	0.0867448
ENSG00000227775	0.109986	0.134161	0.100305	0.0447668	0.0718624	0.0561131	0.0735626	0.0941764	0.12198	0.10572	0.121146	0.084318	0.107021	0.101473	0.0862452	0.061658	0.172664	0.139753	0.111711	0.0639285	0.0614022	0.0746735	0.0590519	0.0929311	0.113326	0.168086	0.0926074	0.181628	0.108185	0.0897839	0.0832177	0.109577	0.0793882	0.259214	0.0963206	0.116948	0.0471275	0.0706621	0.0549514	0.0717773	0.0995202	0.136933	0.0761322	0.148776	0.0914075	0.122971	0.0745465	0.093911	0.0820133
ENSG00000215790	0.106161	0.13011	0.103152	0.0423809	0.0674922	0.0532143	0.071872	0.0918501	0.118213	0.0997185	0.126488	0.082481	0.102663	0.0965147	0.0819557	0.058316	0.167455	0.135694	0.105929	0.062155	0.0588397	0.0723611	0.0563355	0.0920567	0.108279	0.157299	0.0879396	0.178628	0.104087	0.0854104	0.0761915	0.106627	0.0769361	0.255925	0.092725	0.113441	0.0453321	0.0684659	0.0536758	0.0699211	0.0952364	0.128677	0.0703661	0.138263	0.0869626	0.117178	0.067521	0.0893443	0.079361
ENSG00000008130	0.00737032	0.00760589	0.00349923	0.00759222	0.0072498	0.00679484	0.00512113	0.00438945	0.00669718	0.00663412	0.00410726	0.00380991	0.00303011	0.00365886	0.00248028	0.00505636	0.00471251	0.00716738	0.00614832	0.00587083	0.00464951	0.00720627	0.00765102	0.0048623	0.00610217	0.00249464	0.0057534	0.00299156	0.00854932	0.0042343	0.00387464	0.00280506	0.00376769	0.0034073	0.00247983	0.00804598	0.00594658	0.00558779	0.00698242	0.00878034	0.00309247	0.00330233	0.00451202	0.00455169	0.00918628	0.0038545	0.00235388	0.00343538	0.00803159
ENSG00000078369	0.0091119	0.00434896	0.00408046	0.00218515	0.000844393	0.00178698	0.00141538	0.00421225	0.00248363	0.00245129	0.00275716	0.00508889	0.00324397	0.00326884	0.00173293	0.00209086	0.00629598	0.00376837	0.00353978	0.0016613	0.000497937	0.000641478	0.00816893	0.00278875	0.00227016	0.00101563	0.00498165	0.000509966	0.00806412	0.00296938	0.00413037	0.00161262	0.00253154	0.00204661	0.00234228	0.00383074	0.000426033	0.00115446	0.000506161	0.00177042	0.00335031	0.00215744	0.000679878	0.00323577	0.000252328	0.00430634	0.00588663	0.00413134	0.00339805
ENSG00000169885	0.091734	NA	NA	NA	0.0021883	NA	0.0306057	NA	NA	NA	NA	0.0834168	0.0339352	NA	0.0135455	0.016055	NA	NA	0.110101	0.0302276	0.0148373	NA	NA	NA	NA	NA	NA	0.0318375	NA	0.028024	0.0543364	NA	0.12969	NA	NA	NA	NA	0.0223411	NA	NA	NA	0.0506306	NA	NA	NA	0.0627452	NA	NA	NA
ENSG00000178821	0.0356783	NA	NA	NA	0.0268774	NA	NA	NA	NA	NA	NA	0.00284155	0.14232	NA	0.00459934	0.160857	0.0577237	NA	0.0545199	NA	0.00274834	0.0287679	NA	0.0148388	NA	NA	NA	0.0714228	NA	0.0915152	0.120882	0.217412	NA	NA	0.0034145	NA	0.00585938	0.0487878	NA	NA	NA	NA	NA	0.0338692	0.00445906	NA	0.0393839	0.00467153	NA
ENSG00000162585	0.0142832	0.0128913	0.0203289	0.0188417	0.0101584	0.0235907	0.0154474	0.0186973	0.0168766	0.0238887	0.0279574	0.0123487	0.0211761	0.00868993	0.0458687	0.004238	0.0195059	0.0196127	0.0171894	0.0128174	0.0109947	0.0152298	0.0208432	0.01261	0.0138478	0.0174388	0.0342027	0.0189947	0.0188964	0.0203176	0.0185829	0.0189667	0.0161078	0.0347847	0.0304153	0.0169183	0.0217908	0.00463496	0.0149449	0.0144845	0.0240692	0.0203105	0.0160771	0.0162177	0.009357	0.0161311	0.0141044	0.01846	0.0116053
ENSG00000234396	0.0321413	NA	NA	NA	NA	NA	NA	NA	NA	NA	NA	NA	NA	NA	NA	NA	NA	NA	NA	NA	NA	NA	NA	NA	NA	NA	NA	0.0142912	NA	NA	0.0331913	NA	NA	NA	NA	NA	NA	NA	NA	NA	NA	NA	NA	NA	NA	NA	NA	NA	0.0274826
ENSG00000157933	0.00316319	0.00321642	2.54197e-05	0.00308228	0.00663039	0.00273217	0.00321495	0.00786665	0.00461932	0.00526755	0.00774488	0.0145212	0.00583355	0.0153222	0.00403919	0.00664812	0.00583014	0.00260727	0.00467497	0.00281334	0.00311153	0.00377946	0.00364127	0.00562588	0.00963349	0.00860594	0.00486228	0.00559908	0.00527985	0.00880325	0.00339819	0.0118586	0.00651646	0.00902265	0.00451305	0.00215261	0.00116606	0.0120058	0.00244813	0.00196591	0.000372648	0.0108048	0.0113688	0.0063824	0.0119762	0.00401169	0.00697697	0.00734768	0.00634362
ENSG00000116151	0.0108592	0.0141888	0.00277239	0.0179118	0.00803438	0.0156954	0.0126124	0.0159777	0.0104828	0.00888419	0.0917125	0.00621067	0.00865938	0.00688157	0.00704605	0.00762759	0.00976393	0.0118555	0.009186	0.00590779	0.00935639	0.0080822	0.0191324	0.0119346	0.0106257	0.0123304	0.0191911	0.00752708	0.00726805	0.0102009	0.0103886	0.0162961	0.00576225	0.0453706	0.00930246	0.0119722	0.0134264	0.00782805	0.0117463	0.0145982	0.00885542	0.015354	0.010749	0.0071244	0.00524769	0.00907519	0.00587473	0.00790003	0.00495212
ENSG00000269896	0.0330449	NA	0.0058702	0.0423274	0.0176232	0.0177488	0.00331185	0.0268191	0.0252736	0.0278362	0.294011	0.0393137	0.0552443	0.0217363	0.0165682	0.031865	0.0289129	0.0133035	0.0200112	0.0181947	0.0268955	0.0196732	NA	0.038564	0.034701	0.103774	0.0253083	0.0239697	0.0243116	0.0278289	0.0385915	0.0383549	0.0142884	NA	0.063534	0.0472879	0.0204005	0.0193327	0.0227346	0.0289756	0.0405205	0.0899837	0.0247525	0.0309589	0.015916	0.0268288	0.0467548	0.0283173	0.0212329
ENSG00000157916	0.0046557	0.00631505	2.54197e-05	0.019254	0.00252118	0.0175534	0.00399314	0.00457175	0.00444013	0.0047021	0.00343029	0.00240521	0.00435194	0.00220242	0.00656518	0.00536422	0.00356265	0.00762923	0.00417302	0.00606104	0.00664147	0.00902955	0.00602744	0.00496515	0.00466835	0.00356343	0.00621029	0.00713341	0.0054011	0.00527477	0.00345134	0.00278541	0.00358246	0.00918008	0.00518269	0.00727742	0.00942943	0.00262394	0.00576603	0.00205864	0.00428574	0.00551557	0.00676079	0.00527115	0.00172272	0.00444871	0.00289047	0.00291346	0.00120492
ENSG00000157911	0.00337801	0.0057856	2.54197e-05	0.00481299	0.00244183	0.0080461	0.00153762	0.00269495	0.006787	0.00139705	0.00195739	0.00261925	0.00188824	0.00223444	0.000990223	0.0037515	0.00376095	0.0074676	0.0035143	0.00316779	0.0015338	0.00438323	0.00577136	0.00304672	0.00399163	0.00197028	0.00667343	0.00856284	0.00279936	0.00984944	0.00371201	0.00415273	0.00272966	0.0275559	0.000911475	0.00491552	0.00144976	0.0112896	0.00498125	0.00141239	0.00825335	0.000823059	0.00234974	0.008112	0.0015696	0.00193205	0.00166512	0.00161985	2.54197e-05
ENSG00000149527	0.048912	NA	0.00705434	0.0359894	0.0178309	0.0465319	0.0222976	0.0459852	NA	NA	0.111864	0.0118486	0.00479915	0.0554497	0.0191166	0.00663134	0.0418797	0.0438373	0.00897165	0.00783311	0.00739489	0.0094227	0.021271	0.0618475	NA	NA	NA	0.0181588	NA	0.0087508	0.00395804	0.0596885	0.137516	0.0448453	0.0191602	NA	0.0121017	0.0237055	0.00931109	0.0114577	0.018756	0.00754272	0.00411094	0.0426688	NA	0.00988531	0.0279863	0.0859106	NA
ENSG00000157881	0.00560656	0.000535482	0.0074426	0.00577386	0.00505671	0.0024511	0.0014625	0.00357784	0.00456612	0.00217436	0.00239421	0.00358537	0.0066017	0.00301056	2.54197e-05	0.00260795	0.00594411	0.00371156	0.00548373	0.00736209	0.00286014	0.00735991	0.00725202	0.00411814	0.00280751	0.000744854	0.00263471	0.00750658	0.00593121	0.00575497	0.00335384	0.00337063	0.00335926	0.0107765	0.00137448	0.00544669	0.000388467	0.0029734	0.00558372	0.0048767	0.00928313	0.00577049	0.00630506	0.00364516	0.00726268	0.004911	0.00231173	0.00385186	0.000968306
ENSG00000238164	0.00192906	0.00578785	2.54197e-05	0.0204178	0.0191873	0.00505201	0.0107376	0.00381027	0.00199549	0.00225458	0.00147867	0.0128879	0.00217525	0.00459866	0.00355505	0.00199116	0.00216309	0.00286446	0.00134804	2.54197e-05	0.00461859	0.00915194	0.00433356	0.00564723	0.00195074	0.00350929	0.0017455	0.00334986	0.00208437	0.0049331	0.0028971	0.00191698	0.0112221	0.00212303	0.0110763	0.00360136	0.000893247	0.0286777	0.0059048	0.00558419	0.00241788	0.00178941	0.00195201	0.00239553	0.0023618	0.00476628	0.00248959	0.0025516	0.00294526
ENSG00000157873	0.00170952	0.00372071	2.54197e-05	0.00490231	0.0473348	0.00373742	0.00518786	0.00613485	0.00297461	0.0031963	0.00636634	0.0140785	0.00235196	0.00158421	0.00264657	0.00288121	0.00135963	0.00183334	0.00190983	2.54197e-05	0.00253908	0.00224781	0.00573575	0.00304717	0.00309327	0.00386298	0.0021616	0.00191753	0.00208919	0.00354878	0.00211425	0.00135172	0.00986424	0.00149781	0.00834909	0.00373218	0.0034699	0.0325374	0.00501982	0.00301267	0.00217114	0.00249595	0.00170091	0.00197167	0.00167759	0.00585629	0.00238832	0.00341131	0.00321418
ENSG00000157870	0.00595858	0.0189723	2.54197e-05	0.00730572	0.00174985	0.00622273	0.0150983	0.00416443	0.00608934	0.012528	0.00696374	0.00158852	0.00539576	0.00102589	0.00303145	0.00224042	0.00966933	0.00932876	0.00593919	0.012062	0.00222988	0.00455897	0.000286823	0.00277095	0.00282497	0.00326043	0.0112031	0.00791018	0.00359933	0.00720201	0.00925158	0.00549799	0.00285928	0.0393061	0.00400035	0.016547	0.00182891	0.0025778	0.00514513	0.0168662	0.0119357	0.0027041	0.00277701	0.00887613	0.0087592	0.00085552	0.00347703	0.00271156	0.000292531
ENSG00000177133	0.0124626	0.00714442	NA	0.00480419	NA	0.00657634	0.00647072	0.00697366	0.0121405	0.0159099	NA	0.013633	0.0272989	0.0220079	0.010661	0.0207778	0.016013	0.00527984	0.0150218	0.00641358	0.00547084	0.0119944	0.0146879	0.0160524	0.0093372	NA	0.00695603	NA	0.00599838	0.0325266	0.0328069	0.0372786	0.0145385	NA	NA	0.00650709	0.00661864	NA	0.00607912	0.00703878	0.0231258	0.0426945	0.00992886	0.0233223	0.0160366	0.0105235	NA	0.00685449	0.014368
ENSG00000142611	0.012297	0.00316227	0.0100922	0.00427234	NA	0.00887965	0.00249938	0.0100813	0.00723544	0.00661056	NA	0.00490031	0.0179915	0.00261614	0.0150087	0.00482986	0.0141169	0.00356052	0.0082765	0.00177303	0.00503664	0.0109469	0.0124048	0.0144545	0.0100451	0.010188	0.00395487	NA	0.0036293	0.0150372	0.0183765	0.0415258	0.00388988	NA	0.0128608	0.00626311	0.00513754	NA	0.00558601	0.00260079	0.073978	0.00737674	0.00690793	0.00774383	0.020952	0.00307661	2.54197e-05	0.00409336	0.00540749
ENSG00000130762	0.0470549	0.0415277	NA	NA	0.0923847	0.0485362	0.0394621	0.0385452	0.026988	0.016245	NA	0.00656509	0.0613072	0.0122171	0.105054	0.0299655	0.0441116	0.0809895	0.0170203	0.0677781	0.0591606	0.0523785	0.0109687	0.00922831	0.0366529	NA	NA	0.012681	0.0304029	0.0119545	0.0507193	0.0309467	0.011037	NA	0.0697449	0.132737	0.0717679	0.122267	0.0488123	0.0368065	0.0351677	0.0328932	0.0203021	0.0115716	0.893711	0.0176775	0.0225052	0.0073588	NA
ENSG00000162591	0.0181314	0.00571886	0.11428	0.028864	0.0399858	0.0177192	0.0150178	0.0152279	0.0211357	0.0301247	0.0710996	0.0225833	0.00959126	0.00862252	0.0218082	0.0126067	0.0406829	0.0161218	0.0251044	0.0345672	0.0142999	0.0328833	0.0233147	0.0149639	0.0237756	0.0414947	0.0252356	0.0179061	0.0250384	0.00708079	0.010491	0.0198987	0.0202614	0.0219004	0.0151012	0.0191384	0.0252706	0.0185856	0.00895881	0.0289517	0.0454357	0.0114061	0.0238684	0.0122418	0.0516291	0.0164633	0.00451679	0.0197252	0.0605381
ENSG00000158109	0.00607505	0.00645357	0.00147215	0.0120453	0.0146531	0.016481	0.00993565	0.00607787	0.00674221	0.00698505	0.0217378	0.00694752	0.0038999	0.00474228	0.00668798	0.00566578	0.0070691	0.00622366	0.00643707	0.0127978	0.0121897	0.0150818	0.0226046	0.0063347	0.00714026	0.0114958	0.00800736	0.00583089	0.00592454	0.00382453	0.0071315	0.00524639	0.007198	0.00806792	0.00713196	0.00768376	0.0169648	0.0144737	0.0130751	0.0177343	0.0200875	0.00720333	0.0059971	0.00708919	0.00577435	0.00728599	0.00290724	0.00723975	0.00326599
ENSG00000116213	0.0111978	0.00993085	2.54197e-05	0.00456868	2.54197e-05	0.0095749	0.0132443	0.00822229	0.0049757	0.00622297	0.0199451	0.00881434	0.0085713	0.0083667	0.00280928	0.00477077	0.00999851	0.00678944	0.00714761	0.00536923	0.00794577	0.00634096	0.00116284	0.00494495	0.00778264	0.00739608	0.00359182	0.0104167	0.0128929	0.0125187	0.012908	0.00657993	0.0115084	0.0125139	0.00376064	0.00761117	0.00583062	0.00459263	0.00282735	0.00432968	0.0144678	0.00829263	0.00993344	0.0116226	0.00933282	0.0027368	0.00663847	0.00786625	0.00746302
ENSG00000227372	0.00652823	0.00482061	0.00377129	0.00646153	0.00896938	0.0065928	0.0139388	0.00220507	0.00486986	0.0080383	0.0299705	0.0100234	0.0109631	0.00600056	0.0052288	0.00394762	0.00681771	0.00644148	0.0078878	0.00520635	0.00259051	0.00920708	0.0192129	0.00749652	0.00492192	0.00563353	0.00538426	0.0179007	0.00625573	0.00694919	0.0121947	0.00758807	0.00569512	0.0226534	0.0128044	0.00633753	0.0109353	0.00725343	0.00515131	0.0052252	0.0102524	0.00561723	0.00723224	0.0084839	0.00251944	0.00441887	0.00623994	0.00868184	0.00888812
ENSG00000130764	0.00347351	0.0033971	0.00518641	0.00192497	0.00183392	0.00289445	0.00255755	0.00227901	0.00279059	0.00380502	0.00258314	0.00309161	0.00256194	0.00283029	0.00523	0.00282138	0.00281663	0.00293569	0.00223753	0.00293134	0.00271948	0.00282362	0.0023355	0.00221895	0.00252492	0.00245906	0.00363349	0.00182636	0.0045452	0.00314256	0.00291377	0.00340231	0.00354932	0.0125182	0.00233257	0.00207215	0.0016657	0.00124197	0.0039116	0.00299479	0.00366409	0.00327095	0.00219789	0.00327226	0.00325552	0.00370522	0.00328015	0.00271839	0.00432759
ENSG00000272153	0.00392231	0.0058245	NA	0.0037314	0.00106651	0.0028505	0.00016213	0.00294967	0.00386826	0.00661609	0.00190528	0.00435247	0.00215205	0.00206702	0.0132307	0.00165491	0.00470311	0.000781287	0.00269723	0.00412585	0.00343197	0.0152865	0.00602093	2.54197e-05	0.001087	0.0011591	0.00168987	0.00080111	0.00253211	0.00860367	0.00492923	0.00116964	0.00520074	0.0105703	0.00296973	2.54197e-05	0.00313664	0.00134976	0.00390551	2.54197e-05	0.00726256	0.000527486	0.0183774	0.00267137	0.000136351	0.00208157	0.00220734	2.54197e-05	0.00147973
ENSG00000116198	0.016732	0.0134408	0.0179912	0.00454214	0.0118811	0.00785102	0.00357301	0.0149715	0.0108706	0.0171053	0.0214961	0.0321329	0.0243667	0.0163755	0.00469641	0.027497	0.0150293	0.0130438	0.0191773	0.00578234	0.00853344	0.00667551	0.00816832	0.0159525	0.0123218	0.0102775	0.00992579	0.0261869	0.021285	0.0201537	0.0235645	0.0186365	0.0242684	0.0300436	0.0462697	0.0112333	0.0072826	0.0118107	0.00866869	0.00555388	0.0124443	0.0164596	0.0204908	0.014018	0.0334991	0.0104428	0.0170593	0.0189498	0.0171082
ENSG00000169598	0.0158566	0.0313145	0.0258663	0.0324821	0.0326555	0.0222028	0.0189516	0.031918	0.0227011	0.0428437	0.00713176	0.0147942	0.0164497	0.0231846	0.0065708	0.028081	0.0120634	0.0232252	0.0159082	0.0336183	0.0252991	0.0415879	0.0359553	0.0132185	0.0258399	0.00623527	0.0302226	0.0425099	0.0188396	0.0140966	0.0193402	0.0144873	0.0231676	0.0141924	0.0140581	0.0286493	0.0304672	0.0339719	0.0223452	0.0266887	0.0260998	0.0112694	0.0163841	0.0139231	0.018665	0.0365123	0.0216298	0.0167616	0.0246125
ENSG00000198912	0.0379869	0.0208687	0.0317368	0.0465568	0.0357706	0.0481924	0.0446729	0.0279161	0.0233085	0.0385838	0.0128204	0.0338767	0.0337128	0.0287867	0.00809364	0.0539882	0.0271805	0.0296152	0.0378792	0.0376319	0.0237554	0.040023	0.0418432	0.028124	0.0311995	0.0100406	0.0369924	0.0459592	0.0443301	0.0446655	0.0319664	0.0477386	0.0465899	0.0230496	0.0272428	0.0317374	0.0174533	0.0447981	0.0173104	0.0407595	0.0529362	0.0240133	0.037517	0.0297687	0.0522824	0.0395022	0.0378391	0.0326435	0.0499766
ENSG00000196581	0.0351368	NA	NA	0.00781464	0.0119561	0.00794655	0.00824384	0.107582	0.109106	NA	NA	0.250242	0.129916	0.0878565	0.00457327	0.0316502	0.0238927	NA	0.0319404	0.00734783	0.00520692	0.00665755	0.0102348	0.0800129	0.0613916	NA	NA	NA	0.0414096	0.0224754	0.101901	0.0385779	0.0400705	0.461558	0.0759215	NA	0.0080434	0.00597575	0.00611039	0.00736997	0.0443611	0.0323566	0.0218076	0.0634543	0.10408	0.0274996	NA	0.0373853	0.0307524
ENSG00000131697	0.0203451	0.0181911	0.0436883	0.0273225	0.00826315	0.02171	0.0125743	0.0200757	0.0208673	0.0130177	0.0135213	0.0152881	0.0553494	0.0206947	0.0097608	0.0131694	0.0184841	0.02023	0.0153192	0.0128346	0.0129558	0.0108889	0.0235024	0.0202747	0.0209844	0.0185458	0.00970392	0.497211	0.0144163	0.0228717	0.0316807	0.0158946	0.0165687	0.0305338	0.0157487	0.0181378	0.0117858	0.0144829	0.0175996	0.0124685	0.0173613	0.0169763	0.039179	0.0135934	0.0312259	0.0191547	0.00948064	0.0157565	0.00896401
ENSG00000069424	0.00862673	0.00970828	0.00462804	0.00664381	0.00694258	0.00684842	0.00883039	0.00625968	0.00714786	0.0174436	0.00623385	0.0143412	0.00972459	0.00627369	0.00919311	0.0116992	0.00853785	0.0103374	0.0084805	0.00871112	0.00694898	0.0102042	0.00743167	0.0102115	0.00787081	0.0164434	0.0405304	0.0538127	0.00731547	0.0107879	0.00957947	0.00831747	0.0105396	0.0105321	0.00779624	0.0125065	0.00678274	0.00674317	0.00690232	0.00804033	0.00814006	0.00880481	0.0111011	0.00772501	0.0102826	0.0120077	0.0128024	0.009297	0.0102365
ENSG00000116254	0.0664304	0.033779	NA	0.00110383	0.00159775	0.00139122	0.00249879	0.00994024	0.0333436	0.0190762	NA	0.046068	0.0449349	0.00779304	0.000532558	0.0289936	0.0858844	0.0546881	NA	0.00217675	0.000974009	0.00169608	0.0018656	0.00877549	0.0264198	NA	NA	NA	0.0773101	0.0195257	0.0893713	NA	NA	NA	0.0211273	0.0389341	0.000900696	0.0011299	0.00112396	0.000971037	0.00179455	0.0626007	0.0445291	0.0334006	0.042442	0.00328809	NA	0.0716341	0.015128
ENSG00000116251	0.0113307	0.0108408	2.54197e-05	0.0101738	0.00208436	0.00315589	0.00380087	0.0240864	0.00750557	0.00681095	0.00346528	0.00617371	0.00331186	0.00780398	0.00132452	0.0107132	0.00477699	0.00330684	0.00656397	0.0024406	0.00264126	0.00736414	0.00123987	0.0210837	0.00576065	0.00177525	0.00620157	0.00949586	0.00653627	0.0138157	0.00748251	0.00422422	0.034091	0.0167329	0.00219367	0.00306768	0.00408287	0.000419884	0.00692414	0.00332708	0.00460886	0.00713271	0.0107746	0.00535864	0.00255424	0.00651607	0.013768	0.00742596	0.00456586
ENSG00000158286	0.050661	0.0552977	0.0166779	0.0156014	0.0112996	0.0100855	0.0207423	0.116873	0.0389315	0.0100688	0.0604528	0.016975	0.0497115	0.0488646	0.0191075	0.0387783	0.0516358	0.0394498	0.0361338	0.007325	0.0255106	0.00661485	0.0142033	0.0943757	0.0359568	0.0161742	0.0147333	0.0468687	0.0247958	0.0443002	0.0431621	0.0905993	0.181479	NA	0.0305439	0.060798	0.0162611	0.018183	0.0122863	0.0135907	0.00826852	0.0490953	0.0398766	0.0864209	0.0222033	0.0302671	0.0387268	0.0887144	0.0661595
ENSG00000116237	0.0318909	0.0270597	0.0313866	0.0429126	0.0113502	0.0347646	0.0308382	0.0257904	0.0154437	0.0227436	0.0114865	0.014773	0.0239692	0.0211782	0.0141946	0.0128598	0.0284298	0.0191464	0.0331229	0.0291886	0.018625	0.0232797	0.0204133	0.0291505	0.0181801	0.0115038	0.0111269	0.0167388	0.0315735	0.0161239	0.0245257	0.0204019	0.0247166	0.0433588	0.0105443	0.0232253	0.0275841	0.00798437	0.0261954	0.0276353	0.0394442	0.0246472	0.0340789	0.0223447	0.0173625	0.0165541	0.0228699	0.0211197	0.0195303
ENSG00000158292	0.00860177	0.0146247	0.0168248	0.00808761	NA	0.0125083	0.0295873	0.0195155	0.0102523	0.0738705	0.0263265	0.0022274	0.00486983	0.0053555	0.0142547	0.00814183	0.00539788	0.00606273	0.0114972	0.0123293	0.0122	0.00609298	0.0201166	0.0155013	0.00791485	0.0146209	0.144044	0.00522862	0.0125851	0.0177181	0.0054562	0.194894	0.00578318	0.0438691	0.00661088	0.0242238	0.00554744	0.018883	0.0177361	0.0207039	0.02495	0.00948873	0.0266134	0.00321893	0.0104345	0.0070676	0.0070717	0.014917	0.00969427
ENSG00000097021	0.046394	0.0123231	NA	0.00116069	0.0213697	2.54197e-05	0.0194496	0.00227995	0.0120335	0.0279996	0.0113059	2.54197e-05	0.0242106	0.0088305	0.00662786	0.0180266	0.013477	0.0190215	0.0268355	0.000159685	0.00141296	0.00275759	0.000650431	0.0166101	0.0102173	0.00426829	0.0183991	0.0086175	0.0148561	0.0267691	0.0262977	0.0185586	0.0597172	0.0818272	0.00767938	0.00942884	0.00648769	0.0167525	2.54197e-05	0.00272476	0.00418743	0.00418255	NA	0.0147997	0.0177011	0.0331517	0.018964	0.00451407	0.00498603
ENSG00000215788	0.0133902	0.0126223	NA	0.00547679	0.00495148	0.00354402	0.00322207	0.0276947	0.00546495	0.00368207	NA	0.0149702	0.00683994	0.00425065	0.0144842	0.0148154	0.00940704	0.00410961	0.0163642	0.00914634	0.00867269	0.0104268	0.0171215	0.0197286	0.0107837	0.139697	0.0054988	0.013593	0.00775077	0.00470638	0.00586436	0.00775093	0.00879687	0.0150042	0.00590357	0.0189001	0.0127526	0.00527324	0.0101353	0.00504572	0.0178154	0.011375	0.00643887	0.0183277	0.014527	0.00417223	0.00987302	0.00306516	0.00696413
ENSG00000171680	0.00544932	0.0120059	NA	0.00481759	0.00420572	0.00781639	0.0131021	0.00881014	0.00747974	0.00246538	NA	0.0134452	0.00393752	0.00497184	0.00644476	0.00752879	0.00729299	0.00473751	0.00506984	0.00360646	0.00543855	0.00160526	0.0112518	0.00573321	0.00964366	0.127341	0.00507144	0.0178808	0.00626684	0.00731007	0.00384697	0.00816963	0.00488826	NA	0.00512656	0.0139735	0.00259972	0.00471207	0.00454522	0.00262133	0.0152221	0.013	0.0152256	0.00805739	0.00639537	0.00217213	0.00866975	0.00792004	0.00558708
ENSG00000162408	0.00751463	0.00531593	2.54197e-05	0.00982764	0.0027551	0.00365829	0.00449709	0.00390292	0.0041675	0.00541462	0.00383789	0.00292858	0.0156324	0.00780645	3.63293e-05	0.00594655	0.00556818	0.00586953	0.0102989	0.000624546	0.00485374	0.000274419	0.00717583	0.000809969	0.00496726	0.00564528	0.00423611	0.0044178	0.00704629	0.0053422	0.0217673	0.00296479	0.00537076	0.0201826	0.00223263	0.00735397	2.54197e-05	0.00331178	0.00189011	0.0019248	0.0134134	0.00885827	0.00472901	0.00655264	0.00422128	0.00396105	0.00588593	0.00282776	0.00676735
ENSG00000204859	0.0177411	0.0196712	0.00501904	0.0313328	0.00680778	0.00815501	0.00154352	0.00243338	0.0140521	0.0160461	0.0258195	0.0134645	0.0116782	0.0061156	0.00773877	0.00794451	0.0123826	0.0194469	0.013306	0.0170423	0.0109088	0.0225438	0.0278601	0.00708969	0.00935341	0.00402574	0.0203538	0.0199716	0.00977089	0.0141396	0.0168554	0.0120464	0.0135755	0.0215589	0.010361	0.0137438	0.0295215	0.00537446	0.00787899	2.54197e-05	0.04726	0.0132265	0.00347057	0.0141607	0.0031517	0.00700896	0.012911	0.00338709	0.0157489
ENSG00000162413	0.00445487	0.00230439	0.00618707	0.00525675	0.00232651	0.00450369	0.00561798	0.00316441	0.00452086	0.00196322	0.00990751	0.00414841	0.0045961	0.00374602	0.00465439	0.00377381	0.00435324	0.00353511	0.00331653	0.0044184	0.00385199	0.00527783	0.00631924	0.00402452	0.00372465	0.00192368	0.00404667	0.00568631	0.00480747	0.00581721	0.00405453	0.00358947	0.00666369	0.00408725	0.00371024	0.00296574	0.00336054	0.00310123	0.00522206	0.010563	0.00328288	0.00461442	0.00661472	0.00347066	0.00316578	0.00376267	0.00331563	0.00479734	0.00408805
ENSG00000116273	0.00678409	0.00327995	0.0231586	0.00848927	0.00903116	0.0106121	0.0228816	0.00538939	0.00269886	0.00530138	0.00186497	0.00759797	0.00175522	0.00496471	0.000728329	0.00446684	0.00507938	0.0037091	0.00422151	0.00572961	0.00801142	0.0103412	0.0120089	0.00321126	0.00349812	0.000652858	0.00679542	0.00675177	0.00495311	0.00400885	0.00516549	0.00316701	0.00336583	0.0277426	0.00270433	0.00534695	0.00762517	0.00684298	0.0202663	0.0116656	0.0137931	0.00548527	0.00546811	0.00751519	0.00267563	0.00208812	0.000569698	0.00551201	0.00516536
ENSG00000041988	0.0163055	0.0131999	0.000885698	0.00456091	0.00384822	0.00483896	0.0131502	0.00621251	0.00597621	0.0156315	0.0050434	0.00384908	0.0106677	0.00567745	0.0123616	0.0051071	0.0118962	0.0124227	0.0124337	0.00449144	0.00223067	0.0102338	0.0142007	0.00946593	0.0110795	0.00401338	0.0158849	0.0168487	0.00847006	0.00578562	0.011772	0.0102147	0.00852882	0.0170837	0.0133443	0.0118754	0.00715939	0.002007	0.0102375	0.00715658	0.00885687	0.0167354	0.0108223	0.0128324	0.00123913	0.00853163	0.0203233	0.00650504	0.00532931
ENSG00000007923	0.00638635	0.00463272	0.00209363	0.00822074	2.54197e-05	0.00853336	0.0217919	0.00305045	0.00358579	0.00253203	0.00208281	0.00269912	0.0031773	0.00291554	0.00199196	0.00160226	0.00442627	0.00576868	0.00399943	0.00680735	0.00759228	0.00290017	0.0148609	0.00206516	0.00384835	0.00238407	0.00255375	0.00564063	0.00576458	0.00524314	0.00628554	0.00233236	0.00324971	0.0171968	0.00131281	0.00533324	0.000631875	0.00145801	0.00364702	0.00560621	0.00801051	0.00151265	0.00404099	0.00436643	0.00152985	0.00123242	0.00321006	0.000893215	0.00260999
ENSG00000171735	0.00719486	0.0109017	2.54197e-05	0.00651031	0.00777655	0.00579442	0.00485751	0.0138162	0.00436613	0.0265263	0.0166164	0.00908307	0.00910072	0.00991135	0.00437309	0.00913967	0.0125377	0.0135281	0.0104934	0.00590187	0.00654317	0.00536931	0.0101526	0.0119039	0.00776738	0.0386797	0.0134648	0.0423196	0.0102219	0.00944805	0.00940214	0.0157971	0.00558885	0.021362	0.00209901	0.0155344	0.00402533	0.0101489	0.00485822	0.00610738	0.011645	0.00847068	0.00861981	0.00956619	0.0063026	0.00597664	0.00787095	0.0110939	0.00254703
ENSG00000049245	0.00192396	0.00181521	0.000635662	0.00330419	0.00114987	0.00180637	0.00176717	0.00194378	0.00166275	0.00131477	0.00578829	0.00389806	0.00152239	0.0011073	0.00104352	0.00134181	0.00121675	0.00114845	0.00109603	0.0012826	0.000779905	0.00304279	0.0024684	0.00288463	0.00225062	0.00220529	0.00360036	0.00236506	0.00103107	0.00290382	0.00179644	0.000939446	0.00174448	0.00522012	0.00261237	0.00197156	0.00179823	0.00149289	0.0017722	0.00227062	0.00282349	0.00141895	0.00250295	0.00181791	0.00120128	0.00363144	0.00325385	0.0033331	0.000827379
ENSG00000269925	0.0785012	0.037601	NA	NA	0.000751776	NA	NA	NA	0.0523121	NA	NA	NA	0.021041	NA	NA	NA	0.0348373	NA	NA	NA	NA	NA	NA	NA	0.0427337	NA	NA	NA	0.0596861	0.0519467	0.0383318	0.0359275	0.03581	0.0780004	NA	NA	NA	0.00601337	NA	NA	NA	0.039441	NA	0.0372763	0.0173098	0.037608	NA	NA	0.00817342
ENSG00000049246	0.00197611	0.00227014	0.00895913	0.00592355	0.00592679	0.00592274	0.00679469	0.00242752	0.00244456	0.00203731	0.893867	0.00743653	0.00484597	0.00805234	0.00414078	0.00153121	0.00418456	0.00554547	0.00239534	0.0047719	0.00207297	0.00425862	0.00806686	0.00675086	0.00311262	0.0369443	0.00431083	0.0134427	0.00324086	0.00354699	0.00481966	0.0311986	0.00435831	0.348171	0.00303206	0.00402814	0.00699989	0.00251965	0.00651783	0.0054159	0.00556598	0.00382419	0.00112017	0.00629049	0.00164423	0.0023256	0.0029542	0.00763553	0.00252233
ENSG00000236266	0.0152083	0.0172853	0.00585983	0.0655217	0.0701312	0.0588539	0.0546352	0.0111272	0.0100482	0.00791527	NA	0.0137407	0.0127783	0.0201171	0.00623687	0.00730888	0.0198237	0.0161912	0.00617786	0.0358163	0.032557	0.057617	0.0812663	0.0105716	0.0161844	NA	0.0204308	0.03815	0.00770448	0.0261182	0.0138441	0.0481295	0.00969547	NA	0.00609372	0.0108778	0.0515524	0.0104718	0.0833166	0.0415994	0.0282702	0.0152685	0.0353173	0.0233292	0.00681016	0.0122207	0.0120953	0.0134642	0.00895357
ENSG00000116288	0.0171792	0.0197334	0.0130794	0.014575	0.0053627	0.0129974	0.0260131	0.0253063	0.0227697	0.0148462	0.00329092	0.0175089	0.0221089	0.00899252	0.00173492	0.0175976	0.0157704	0.0161836	0.0190994	0.0161871	0.0143339	0.00845761	0.0226956	0.0120853	0.0208984	0.0133902	0.0221296	0.0114312	0.0132603	0.0171434	0.0266672	0.00535119	0.00945719	0.0172547	0.00944469	0.0219929	0.0183549	0.00955661	0.0118476	0.0117175	0.0161521	0.0145125	0.0041681	0.0153853	0.01094	0.00908295	0.0328349	0.0139255	0.0127728
ENSG00000116285	0.00590454	0.0145655	0.00217972	0.0111229	0.00405938	0.0221549	0.00504124	0.00212037	0.00376676	0.0059597	NA	0.00100953	0.00174741	0.00255814	0.00178799	0.00373158	0.00332776	0.0112239	0.00413911	0.00131445	0.00367972	0.00438444	0.00192391	0.00174025	0.00318214	0.00848795	0.00803553	0.0159041	0.0089473	0.00644938	0.00227219	0.00936426	0.00313791	0.0769726	0.00281151	0.0257086	0.00480039	0.00250719	0.00106311	0.00241318	0.00782612	0.003938	0.00357872	0.00319178	0.00174502	0.00274543	0.00407858	0.00419979	0.00483515
ENSG00000238290	0.0979037	NA	NA	NA	NA	NA	NA	NA	0.0466319	NA	NA	NA	NA	NA	0.0641923	NA	0.0395014	NA	0.0704761	NA	NA	NA	NA	NA	0.0473531	NA	NA	NA	NA	0.0624143	NA	NA	0.0229164	NA	NA	NA	NA	NA	NA	NA	NA	NA	NA	NA	NA	NA	NA	NA	NA
ENSG00000162426	0.0101011	0.00758506	0.00185861	0.00148795	0.00255271	0.00450447	0.00216163	0.00831724	0.00449068	0.00806631	NA	NA	0.0158294	0.00796825	0.00479051	0.00978203	0.00312768	0.0131216	0.00919354	0.00131208	0.000714994	0.00137097	0.00733925	0.00350901	0.00298463	0.00489193	0.0351137	NA	0.00841518	0.00620183	0.0203554	0.00795598	0.0122202	NA	0.0137596	0.00851695	2.54197e-05	0.00142953	0.00207644	0.003734	0.00719709	0.0116618	2.54197e-05	0.0133303	0.00806319	0.00229325	NA	0.00751848	0.00300279
ENSG00000142599	0.00573087	0.00127147	2.54197e-05	0.00333864	0.000968554	0.00173957	0.00388785	0.0016853	0.00176866	0.00282337	0.00330825	0.00389704	0.00410148	0.00446603	0.00046693	0.00258262	0.00763293	0.00251213	0.0053196	0.00380683	0.00302923	0.00237298	0.00286361	0.00219423	0.00164567	0.00270322	0.00225272	0.00212905	0.00295086	0.00248521	0.00388894	0.00349657	0.00283618	0.0115058	0.00204225	0.00165238	0.00460099	0.000770027	0.00252276	0.00167208	0.00270065	0.0062082	0.0021243	0.00401437	0.000909869	0.00188112	0.00313605	0.00261752	0.00128542
ENSG00000232912	0.0257366	NA	NA	NA	NA	NA	NA	0.0246622	0.00360249	NA	NA	NA	NA	0.0285343	0.0179686	NA	NA	NA	0.0447368	NA	NA	NA	NA	0.0479049	0.0137191	NA	NA	NA	0.0496827	0.0161669	NA	0.00737888	0.0407264	0.0186635	NA	0.0502921	NA	NA	NA	NA	NA	NA	NA	NA	NA	NA	NA	NA	0.0348435
ENSG00000074800	0.0360357	0.0417232	0.0528833	0.0104683	0.0282232	0.0441324	0.0821305	0.0770285	0.0852785	0.0174102	0.0463029	0.0417703	0.0384305	0.0208547	0.0164642	0.0195038	0.0261901	0.0272648	NA	0.0214873	0.0311033	0.0137712	0.0510961	0.0425857	0.0778697	0.028846	0.0125594	0.0283888	NA	0.0715446	0.0302158	0.0317824	0.0360446	0.0156357	NA	NA	0.00674284	0.0204573	0.0220804	0.0250331	0.0313462	NA	0.0602143	0.0155244	0.018628	0.0168112	0.00811463	0.0496886	0.0360404
ENSG00000131686	0.0285698	NA	NA	NA	NA	NA	NA	NA	NA	NA	NA	NA	0.0598167	NA	NA	NA	NA	NA	0.11477	NA	NA	NA	NA	NA	NA	NA	NA	NA	NA	NA	0.0394815	0.0609356	NA	0.0478402	NA	NA	NA	NA	NA	NA	NA	NA	NA	NA	NA	NA	NA	NA	NA
ENSG00000142583	0.144416	0.168539	NA	0.0240291	0.0263601	0.0206283	0.0477371	0.050615	0.0807195	0.0491416	0.0237394	NA	0.0545922	0.0641063	0.00490928	0.0269091	0.104515	0.1098	0.108297	0.037516	0.0408334	0.0163934	0.012563	0.0562343	0.0444155	0.763647	0.134557	NA	0.0369065	0.238648	0.0936186	0.0181258	0.0877808	0.0680391	0.034159	0.209976	0.0205912	0.0259722	0.0328513	0.0195867	0.0180123	0.0278774	0.0551844	0.066976	0.0184445	0.0385649	0.0873099	0.105491	NA
ENSG00000180758	0.0168824	0.017967	0.0173811	NA	NA	NA	NA	0.0166801	0.00729808	0.0109194	0.0242744	0.00719257	0.0102958	0.00958237	0.00660387	0.00622498	0.0110589	0.0063642	0.0094579	NA	NA	0.0206619	NA	0.00509001	0.00969734	0.0160613	0.00744411	0.00838981	0.010183	0.0126631	0.0112055	0.00735002	0.00561925	0.0402874	0.006841	0.0147568	NA	NA	NA	NA	NA	0.00570766	0.00581908	0.0079189	0.0121664	0.0253837	0.00266779	0.0132568	0.00217872
ENSG00000228526	0.00948845	0.00877435	0.0105221	0.00752428	NA	0.0348905	0.00734217	0.0149878	0.00891373	0.0063273	0.00764415	0.00543218	0.012199	0.00759732	0.00260883	0.00751309	0.00910635	0.00447458	0.00873061	0.00542991	0.0338803	0.0109746	0.0326457	0.00764549	0.0132849	0.00116309	0.0153236	0.0205431	0.00640556	0.00913843	0.0098174	0.00533324	0.00983347	NA	2.54197e-05	0.0117922	NA	NA	0.00957287	0.0148252	0.0238832	0.0124055	0.00585064	0.00730193	0.00538375	0.0071512	0.00353908	0.00628958	0.00487246
ENSG00000234546	0.0670568	0.0327568	NA	NA	NA	NA	NA	NA	0.0275818	NA	0.0140373	0.0138819	0.0229588	NA	0.0123992	0.0165222	0.0417584	0.0245768	0.0374677	NA	NA	NA	NA	NA	0.0303981	0.00725688	NA	NA	0.0244256	0.0167104	0.0293339	0.0188325	0.021714	NA	0.00603882	0.0285468	NA	NA	NA	NA	NA	0.0260881	NA	0.0344543	0.0142686	0.0166464	0.0133412	0.0118729	0.01315
ENSG00000049239	0.0105782	0.0197434	0.0102913	0.0106531	0.0751825	0.0165031	0.0117446	0.015447	0.0156726	0.0118523	0.0134911	0.0101738	0.00701637	0.0152797	0.0072835	0.00988077	0.0105869	0.0179143	0.00891847	0.0137538	0.0166437	0.013198	0.0223797	0.0145542	0.0178116	0.0244936	0.0121846	0.00738782	0.0123531	0.0103634	0.00755305	0.00930483	0.00900419	0.0202943	0.00570967	0.018137	0.0143779	0.0548273	0.0098993	0.0157218	0.0164565	0.0107437	0.0112402	0.0119836	0.00806996	0.00823669	0.0114942	0.00976068	0.0137512
ENSG00000171621	0.00508335	0.00588061	2.54197e-05	0.00852678	0.0351351	0.00924594	0.0098618	0.00363192	0.0047157	0.00905792	0.0771101	0.013566	0.00588332	0.00658123	0.00572469	0.0029082	0.00959789	0.00433599	0.00568731	0.00503687	0.00524742	0.00491756	0.0101311	0.00356377	0.00595494	0.013268	0.00993874	0.0149021	0.0078941	0.00683748	0.00718203	0.0120145	0.00663913	0.0712493	0.0164258	0.00480758	0.0273157	0.0185785	0.00611434	0.00883309	0.00820937	0.00658442	0.0157819	0.0066268	0.00662087	0.00578785	0.00545875	0.006091	0.00504086
ENSG00000171612	0.0208003	0.0226515	NA	0.0400039	0.0083297	0.0092829	0.0104543	0.0155483	0.0261911	0.0129671	0.00391491	NA	0.0101158	0.0256356	0.00529305	NA	0.0122345	0.00583498	0.0104403	0.00509927	0.00759516	0.0193126	0.00660287	0.00346412	0.019928	0.00960431	0.00809072	0.00119807	0.0218437	0.0572764	0.0538793	0.0050796	0.0103393	NA	2.54197e-05	0.03388	0.0231145	0.0463126	0.00189001	0.0316806	0.013957	0.00510628	0.0255299	0.0245743	2.54197e-05	0.00466183	0.00788944	0.0278995	0.020384
ENSG00000188807	0.00863286	0.00833564	0.027702	0.0112354	2.54197e-05	0.0110775	0.00658936	0.00952072	0.00434889	0.00878827	0.00623793	0.0111636	0.00597418	0.0246851	0.00382148	0.00733384	0.00592231	0.0105472	0.00877396	0.00449746	0.00290979	0.00372039	0.00132116	0.00660889	0.00231582	0.00162268	0.00247123	0.0107328	0.00445759	0.00503026	0.00349682	0.00493081	0.0114747	NA	0.00819722	0.0155841	0.00416828	0.00415638	0.0027095	0.00697915	0.00671244	0.00943434	0.0167749	0.00833031	0.00137637	0.00930984	0.00802726	0.00141688	0.00193085
ENSG00000171608	0.0145063	0.0120103	0.0199344	0.0522887	0.0160027	0.0155434	0.0138238	0.0146436	0.00647984	0.0221829	0.00592581	0.0109596	0.023363	0.00912469	0.0113766	0.00174738	0.0104601	0.0082796	0.0071222	0.0189428	0.0152658	0.010278	0.0189055	0.00424572	0.0122904	0.0103952	0.0179597	0.00630413	0.0137196	0.00934538	0.0204878	0.00630545	0.0130834	0.0058975	0.00667232	0.016828	0.00897278	0.0300946	0.0300027	0.00759207	0.0147665	0.00696038	0.0042151	0.00604951	0.0151378	0.0217895	0.00282249	0.011433	0.00949714
ENSG00000171603	0.00240406	0.000593299	NA	0.000623562	0.000615778	2.54197e-05	0.000688289	0.00170415	0.00159691	0.00191361	0.00673012	0.0236101	0.0026383	0.000653066	0.00118286	0.00174704	0.00166037	0.000418835	0.00186849	0.000698491	0.000712585	2.54197e-05	0.00321751	0.00206507	0.0011458	0.000548944	0.00180109	0.00633916	0.00144431	0.00131342	0.00459167	0.000694394	0.00202956	0.0113177	0.000197686	0.00092245	0.000309819	0.00153602	0.00124834	0.000173316	0.00398605	0.00278148	0.0019946	0.00184474	0.00055937	0.00164699	0.000633674	0.00235044	0.000678798
ENSG00000178585	0.00472198	0.0076753	0.00923049	0.0038525	0.00124233	0.00115155	0.00157518	0.00620499	0.0031234	0.00527021	0.0187685	0.0038488	0.0107429	0.00511995	0.00451314	0.0130756	0.00126337	0.00392914	0.00613367	0.00459757	0.00354756	0.00130253	0.0022765	0.00459697	0.00491856	0.0038322	0.00172555	0.00439665	0.00425163	0.00226046	0.0100963	0.00984135	0.0017727	0.0115955	0.00155873	0.00613038	0.0022841	0.00158065	0.00259826	0.0022829	0.00105639	0.0118275	0.00605336	0.00155108	0.00335243	0.00269152	0.00442867	0.00421721	0.00475798
ENSG00000162441	0.0104494	0.00686504	0.0108945	0.00321634	0.000430802	0.00851686	0.00498143	0.00820057	0.00352974	0.00712404	0.054054	0.00748427	0.00589073	0.00223299	0.0110291	2.54197e-05	0.00471689	0.00096573	0.00874099	0.00484534	0.00181918	0.00637718	0.00306311	0.00321465	0.00594835	0.00298307	0.00934998	0.00549605	0.00586707	0.00505347	0.00569196	0.00165546	0.00726597	0.0189613	0.00703617	0.0114291	0.00792454	0.00967713	0.00930404	0.00133293	0.0071832	0.00673517	2.54197e-05	0.0107624	0.0039003	0.00760748	0.00225353	0.00451064	0.00297717
ENSG00000173614	0.0652576	NA	NA	NA	NA	NA	NA	0.0335119	0.0322678	0.0336166	0.0212627	0.0335782	0.0600462	0.00721512	0.0264208	NA	0.0365632	0.0873915	0.0198466	0.0599936	NA	NA	NA	0.0283316	0.0194055	0.0522039	0.0630797	0.0511629	0.0333202	0.0627425	0.0442858	0.0323856	0.0300831	0.0803191	2.54197e-05	NA	NA	NA	NA	NA	NA	0.0161813	0.0267789	0.0523883	NA	0.0416037	0.00534551	NA	NA
ENSG00000162444	0.0411168	0.00434428	NA	NA	NA	0.036095	0.126455	2.54197e-05	0.039242	0.0220013	NA	NA	0.0196061	NA	0.151192	0.0040968	0.0348416	2.54197e-05	0.0164194	NA	NA	NA	0.126174	0.00552218	0.00492997	NA	0.0122266	NA	0.0158979	0.0289129	0.0216802	0.00656785	0.0275367	0.0701951	NA	0.0373221	NA	NA	NA	NA	0.0160461	0.0127782	NA	0.0485354	0.0773039	0.013168	0.0316186	0.0635873	NA
ENSG00000130939	0.00867207	0.0065417	0.00531878	0.00406992	0.0072788	0.00787639	0.009916	0.00477092	0.00531694	0.0059328	0.00541238	0.00611936	0.00594136	0.00451597	0.00825187	0.00220864	0.00901062	0.0105648	0.00859941	0.00439877	0.00766165	0.00745318	0.00450003	0.00537005	0.00491792	0.00667251	0.00474632	0.00417059	0.0096442	0.00612527	0.00635785	0.00502744	0.00916175	0.0235128	0.0063764	0.00553612	2.54197e-05	0.0105491	0.00480385	0.00316453	0.00288694	0.00491892	0.00658342	0.00716042	0.00898529	0.0053425	0.00543077	0.00763989	0.00464353
ENSG00000054523	0.00728797	0.00118903	0.0028581	0.0150202	0.0255109	0.0181231	0.0189361	0.00419681	0.00427367	0.00191149	0.0423367	0.00484802	0.00616376	0.00532045	0.00473096	0.00393295	0.00608885	0.00526758	0.0068213	0.0168388	0.0166131	0.0180423	0.015499	0.00483243	0.00365572	0.00388664	0.00341625	0.00636102	0.00534949	0.00418683	0.00501354	0.00627699	0.00579437	0.00939747	0.00833204	0.00434145	0.0170528	0.0222711	0.0227043	0.0205123	0.0138805	0.00620473	0.00558153	0.00566284	0.00408856	0.0073522	0.00669301	0.00435362	0.00358111
ENSG00000142657	0.0020147	0.00307154	0.0260608	0.00415054	0.00116978	0.00376368	0.00533576	0.00550947	0.0131013	0.00221949	0.00383884	0.00505196	0.00518467	0.00478573	0.0013068	0.0020583	0.00110584	0.00552782	0.001443	0.00130266	0.00439721	0.0015437	0.000653517	0.000857535	0.00524897	0.064721	0.00341778	0.0109398	0.00304229	0.00907902	0.0108154	0.00086645	0.00295526	0.00416671	0.0083563	0.00570758	0.003057	0.00567237	0.00106148	0.00236968	0.00192734	0.0021583	0.000204236	0.00280234	0.0099063	0.00677704	0.00119022	0.0133887	0.00559208
ENSG00000175279	0.0356294	0.0338155	NA	0.0861666	0.0060612	0.00886513	0.0120396	0.0214822	0.0219296	0.0243324	0.00763469	0.0150383	0.0349238	0.0103033	0.00148479	0.0327493	0.0176114	0.0293392	0.0203309	0.0149827	0.0250706	2.54197e-05	0.0177447	0.0264421	0.0192884	0.0101472	0.0299941	2.54197e-05	0.00948536	0.0198065	0.0398221	0.00725736	0.0136142	NA	0.0143442	0.0250693	0.0198778	0.0283317	0.0102467	0.00289299	0.0339689	0.0156813	0.00569373	0.0128174	0.00421983	0.00639653	0.00250223	0.00727148	0.0147535
ENSG00000160049	0.0195434	0.0130174	0.0599724	0.00363848	0.0110697	0.00539256	0.0162418	0.0073951	0.0088689	0.00932245	0.00490439	0.01481	0.0105822	0.0034778	0.00354907	0.0129758	0.0093997	0.00981376	0.0141197	0.0116317	0.00968812	0.0296021	0.00186319	0.0140096	0.0132751	0.0164363	0.01019	0.0047951	0.0193301	0.00893781	0.0214618	0.0155587	0.0113401	0.0528896	0.00377646	0.0268995	0.00801207	0.0105639	0.00858164	0.0112969	0.011803	0.00698812	0.0101637	0.0275942	0.0135923	0.015857	0.00371602	0.0111311	0.00455839
ENSG00000142655	0.0139138	0.00474633	0.0138193	0.0113635	0.0128662	0.041574	0.0205149	0.0106249	0.00776391	0.00712324	0.00942452	0.00610503	0.00655308	0.00745795	0.00328284	0.00565602	0.00862423	0.00537237	0.00941253	0.0113213	0.00739843	0.0181561	0.00807848	0.0058844	0.0126623	0.00242086	0.00593977	0.0195813	0.00960607	0.008007	0.00851464	0.00692322	0.0068194	0.0162965	0.00497981	0.00689139	0.00910607	0.00630209	0.00408053	0.00539698	0.0157096	0.00622453	0.0103242	0.0156178	0.000825017	0.00409512	0.00478888	0.00386566	0.00649387
ENSG00000130940	0.0153132	0.00702469	0.00541897	NA	NA	NA	NA	0.00479782	0.0046917	0.00440847	0.00484623	0.00707877	0.00294225	0.00623618	0.00610017	0.00687628	0.00769937	0.0122692	0.00309018	NA	0.044764	2.54197e-05	NA	0.00469159	0.00699465	NA	0.00447044	0.0139637	0.0150271	0.0029087	0.00339071	0.0112371	0.00798854	0.0126311	0.0148191	0.00520907	NA	NA	0.0528685	0.0255804	NA	0.00347969	0.00718506	0.00325494	0.025133	0.00890832	0.00394149	0.00295489	0.0143801
ENSG00000272078	0.0234787	0.00724937	0.0136616	NA	NA	NA	NA	0.00567343	0.00519605	0.00285457	0.00432649	0.00299478	0.00391042	0.00623625	0.00676167	0.00792496	0.00730489	0.00935997	0.00286998	NA	0.0544513	NA	NA	0.00448969	0.00691307	NA	0.00477962	0.022001	0.020576	0.00297916	0.00395004	0.00865768	0.00968653	0.0107465	0.0228343	0.00561967	NA	NA	NA	NA	NA	0.00367928	0.0037048	0.00431873	0.0466859	0.00724386	0.00364171	0.00270375	0.016644
ENSG00000120948	0.0123452	0.0161591	NA	0.0113699	0.00687649	0.0553444	0.00744925	0.0112628	0.00984351	0.00939311	0.00579888	0.00766489	0.00581797	0.0103364	0.00772251	0.00450476	0.0122492	0.00529832	0.0125059	0.00507861	0.0166183	0.0113483	0.039454	0.0107681	0.00773355	0.00581837	0.00692104	0.020864	0.0127487	0.0102199	0.0101626	0.00693138	0.00795887	0.0377644	0.0117684	0.00928117	0.0500495	0.00701965	0.00617514	0.0162975	0.0100336	0.00570678	0.0095971	0.0119956	0.0102675	0.00949449	0.00704263	0.00993237	0.0159237
ENSG00000009724	0.0153791	0.01457	NA	0.0661859	0.00955647	0.015645	0.0145134	0.00967294	0.00454273	0.0123295	2.54197e-05	0.00506973	0.00970379	0.00249633	0.00732658	0.0154237	0.00354551	0.00887692	0.00945134	0.00611283	0.00797233	0.0165765	0.0018232	0.00592271	0.00486424	0.00928053	0.0199075	0.0281483	0.0174438	0.015486	0.010042	0.0150053	0.012502	0.0284467	0.0173637	0.00938873	0.0253836	0.0152525	0.0102254	0.0153175	0.00885534	0.00496243	0.00078621	0.0115302	0.00465587	0.0110756	0.00592288	0.0120083	0.00937274
ENSG00000271895	0.0316208	0.0286993	NA	NA	NA	NA	NA	2.54197e-05	0.0298669	NA	NA	NA	0.0139254	NA	NA	NA	2.54197e-05	NA	0.014562	NA	NA	NA	NA	2.54197e-05	NA	NA	NA	NA	0.0162346	NA	0.02441	NA	2.54197e-05	NA	NA	2.54197e-05	NA	NA	NA	NA	NA	NA	NA	0.0472058	NA	NA	NA	NA	NA
ENSG00000116649	0.00246804	2.54197e-05	NA	2.54197e-05	0.00573366	0.0122716	0.00142378	0.000359546	0.00205258	0.00206465	0.00204364	0.0123787	0.00156375	0.00131884	0.00233021	0.000790103	0.000250995	0.00281064	0.00187122	2.54197e-05	8.83219e-05	0.00162076	0.00324287	0.00462628	2.54197e-05	0.000502854	0.000582571	0.00532904	0.00143407	0.00247042	0.00242936	0.00533876	0.00156659	0.00993107	0.00231856	0.0013838	2.54197e-05	0.00446505	0.000330633	0.000550931	2.54197e-05	0.00199411	NA	0.00150159	0.00118655	0.000562207	0.00524396	0.00515095	0.00703633
ENSG00000171824	0.00518685	0.00533997	0.00904681	0.00978475	0.00930176	0.0108033	0.00508847	0.00487287	0.00482361	0.00456822	0.00265436	0.00469768	0.00335171	0.00315236	0.00328818	0.0082875	0.00419356	0.00367538	0.00392128	0.00419828	0.00886039	0.00616316	0.0094457	0.00414876	0.00540578	0.00319069	0.00416718	0.00434839	0.00325955	0.00530997	0.00442966	0.00418677	0.00485043	0.00786943	0.00392011	0.00454202	0.0088336	0.0125394	0.00689042	0.00611571	0.0087942	0.00283131	0.00464009	0.00560373	0.00563204	0.00676208	0.00422459	0.0046744	0.00533851
ENSG00000226849	0.00594514	0.00605906	0.00656216	0.0130983	0.0100792	0.0130729	0.00716944	0.00434073	0.00439285	0.00415348	0.00138778	0.00683233	0.0027989	0.00364272	0.00443726	0.010764	0.00356232	0.0026343	0.00589512	0.00454364	0.00900355	0.010124	0.00702949	0.00346254	0.00607654	0.00318669	0.00383377	0.00239889	0.00360143	0.00503695	0.00435509	0.0029998	0.00547828	0.011247	0.00371903	0.00575466	0.0097276	0.0137553	0.00748598	0.00736285	0.00462759	0.00316553	0.00510011	0.00526979	0.00720334	0.00680067	0.0034274	0.00511564	0.00450696
ENSG00000230337	0.00207316	5.362e-05	NA	NA	2.54197e-05	NA	NA	0.0189951	2.54197e-05	NA	2.54197e-05	0.00695414	0.0031912	0.00944553	2.54197e-05	0.0383931	0.0161438	0.00108985	0.00510707	0.0105266	2.54197e-05	NA	NA	0.00182613	0.00855329	0.00111322	NA	NA	0.00278346	2.54197e-05	0.0157137	0.00759337	0.00611222	NA	2.54197e-05	2.54197e-05	2.54197e-05	0.00319813	0.00492739	0.0223231	NA	0.00200184	NA	0.00339641	0.0100565	0.00402332	0.0144857	2.54197e-05	0.00123143
ENSG00000198793	0.00549088	0.00721266	0.0124442	0.00534352	0.00161101	0.00674775	0.00228929	0.00603087	0.00356368	0.00317404	0.00135299	0.00175299	0.00268738	0.00268591	0.00107721	0.0133913	0.0048966	0.00429873	0.00482272	0.00172541	0.00614273	0.00776943	0.00594062	0.00312369	0.00401876	0.00206139	0.00209057	0.00145477	NA	0.00384006	0.00277333	0.00208925	0.00331798	0.00992446	0.0025926	0.00681875	0.00274578	0.000422865	0.00128087	0.00340709	0.000696952	0.00255598	0.00200029	0.00363646	0.00448642	0.00279375	2.54197e-05	0.00217154	0.00231193
ENSG00000225602	0.0225511	0.0100274	NA	NA	0.0118073	NA	NA	0.0135705	0.00475922	0.00542535	0.0015538	NA	0.0174489	0.0241517	0.000247639	0.0150581	0.0188852	0.022485	0.0123901	0.0173973	0.0182172	0.0551827	NA	0.00323821	0.0102108	2.54197e-05	0.0109747	0.0239346	0.0273264	0.0125995	0.0106662	0.0296407	0.0199242	NA	0.0100944	0.0123072	0.0446355	0.0165977	0.0206275	0.00919632	NA	0.0175497	NA	0.0272648	0.0347932	2.54197e-05	0.0078672	0.0118518	2.54197e-05
ENSG00000171819	0.0548805	0.0507691	NA	NA	0.00524046	NA	NA	0.0702549	0.0635721	0.0355688	NA	NA	0.0185252	0.142882	NA	0.183406	0.0256856	0.0582259	0.131085	NA	NA	NA	NA	0.0734691	0.0399172	NA	NA	NA	NA	0.025952	0.0387244	NA	NA	NA	NA	0.0741162	NA	0.0195199	NA	NA	NA	NA	NA	0.116964	NA	0.018149	NA	0.01693	NA
ENSG00000120942	0.0180353	0.0102286	NA	0.0157277	0.0255264	0.0199584	0.00750105	0.0319779	0.0145266	0.00856051	0.0173883	0.0119064	0.0196121	0.011333	0.00801416	2.54197e-05	0.0117938	0.0204709	0.00414795	2.54197e-05	0.0152287	0.0464449	NA	0.00475632	0.0155163	0.00383507	0.0143531	2.54197e-05	0.0102008	0.0386561	0.00837586	0.00295391	0.0191302	0.0229347	0.0122656	0.0122005	0.0153965	0.0237232	0.0153352	2.54197e-05	0.00970855	0.00924365	0.0680187	0.0159147	0.0033219	0.00607489	0.0292761	0.00760116	0.00479641
ENSG00000116661	0.0813856	0.0600324	NA	0.0131764	0.00478103	0.0104828	0.00697696	0.0268155	0.0300014	0.0188877	NA	0.0584405	0.0167711	0.0297635	0.00971969	0.0108009	0.0262818	0.0318878	0.0131773	0.00609808	0.00414431	0.0117167	0.00715025	0.0179568	0.0352374	NA	0.0435885	0.0130607	0.0105489	0.0203041	0.0120582	0.0295655	0.0331616	0.134897	0.0312734	0.0677448	0.00901128	0.00302583	0.00747932	0.00386399	0.00771245	0.0180753	0.0406152	0.0600221	0.0867643	0.0083891	0.0174079	0.0296219	0.0573722
ENSG00000132879	0.0140708	0.019422	0.0406763	0.0161993	0.0102328	0.0127101	0.0192777	0.0115911	0.0137276	0.0137323	0.0195597	0.01501	0.00992567	0.0146141	0.0104785	0.0106818	0.0144669	0.0168678	0.0122935	0.0142407	0.0150291	0.0150721	0.00779231	0.020509	0.011266	0.0180223	0.0168127	0.0112357	0.0115654	0.0106221	0.0094926	0.00889211	0.0127493	0.0226816	0.0139424	0.0203796	0.0151159	0.00928834	0.0173507	0.0164403	0.0148408	0.0101216	0.0117836	0.00967795	0.00967715	0.0159276	0.0184517	0.0127167	0.00646354
ENSG00000116663	0.0295016	0.0370231	0.0190767	0.0306351	0.0187878	0.0317016	0.0334071	0.0325846	0.018732	0.0252951	0.0315371	0.02201	0.0320167	0.0492482	0.0148534	0.0163584	0.0302963	0.0279414	0.0260035	0.0235414	0.0226921	0.031486	0.0248194	0.0340529	0.0190973	0.0227369	0.0310121	0.035513	0.0186103	0.0244539	0.0280274	0.0184978	0.0334366	0.031566	0.0212693	0.0422303	0.0215745	0.0151845	0.0218483	0.0157699	0.0370827	0.0302424	0.0455927	0.0259488	0.0275152	0.0290157	0.038752	0.0341979	0.0135913
ENSG00000116670	0.0481799	0.0361394	NA	NA	0.0455342	NA	NA	0.0493115	0.0396466	0.0518491	0.00403985	NA	0.0297642	0.0176607	0.00232191	NA	0.0336717	NA	0.0510053	0.00782451	NA	2.54197e-05	NA	NA	0.0247491	0.0263451	0.0436503	NA	0.0408907	0.0309706	0.027822	0.0343948	0.0414631	0.0388093	NA	0.0610056	NA	0.0473646	0.0457004	0.0293743	NA	0.0647951	NA	0.0398803	0.0229934	0.0254758	NA	NA	0.0342716
ENSG00000177674	0.00675155	0.0126926	0.000878581	0.00676861	0.00337485	0.0116281	0.00282386	0.00730433	0.00703854	0.00738044	0.016659	0.0114066	0.0157669	0.00810716	0.00510637	0.00716858	0.00582212	0.00830357	0.00883053	0.00338763	0.00650559	0.00563386	0.00544974	0.00792952	0.010658	0.00492717	0.0112079	0.0134636	0.00546106	0.00894087	0.0114723	0.00495567	0.0142187	0.00600092	0.0087741	0.00751582	0.00776458	0.0312867	0.01112	0.00358377	0.0170029	0.0171348	0.00539623	0.00496142	0.00830929	0.00555767	0.00651347	0.00837908	0.00332227
ENSG00000177000	0.0148421	0.00962989	0.0228599	0.00650893	0.0097397	0.00476916	0.00868529	0.0121391	0.00860635	0.00691599	0.0265519	0.0147429	0.0108059	0.0115688	0.0087534	0.0134386	0.0167745	0.0083167	0.0130481	0.00617621	0.00546045	0.00461622	0.00559746	0.00956171	0.010762	0.0120654	0.0100272	0.0219599	0.00865819	0.00878976	0.0122268	0.0138871	0.0111034	0.0219883	0.0122317	0.0139775	0.00860911	0.0129193	0.00606102	0.00711239	0.0155077	0.0104314	0.0128399	0.0119266	0.0385085	0.00603449	0.00917119	0.0136251	0.0127044
ENSG00000011021	0.00448724	0.00373936	0.00579935	0.00103059	0.00458528	0.00326576	0.000676611	0.0014512	0.00216269	0.00502666	0.00167711	0.00481498	0.00515345	0.00361289	0.00968222	0.00312904	0.00452481	0.00403576	0.0025765	0.00254882	0.00213265	0.00513892	0.00613828	0.00404537	0.00325213	0.00245454	0.00486109	0.0102432	0.00406048	0.00444325	0.00626943	0.00383363	0.00289218	0.0276548	0.00325086	0.00381362	0.00230749	0.00457948	0.00230884	0.00154979	0.00129337	0.00410645	0.00414346	0.00568358	0.00303736	0.00430969	0.00522792	0.0028954	0.00235892
ENSG00000242349	0.629603	0.893867	NA	0.607397	0.730168	0.332253	0.893867	0.508137	0.710365	NA	0.377487	0.665027	0.754307	0.417907	0.0832561	0.54997	0.620757	0.682821	0.749495	0.893867	0.301664	0.424915	0.868073	0.671384	0.590242	0.893867	0.375675	0.47137	0.716193	0.421936	0.807573	0.40982	0.638426	0.475478	0.666267	0.792861	0.47408	0.767696	0.266033	0.865611	0.792943	0.680105	0.671386	0.382131	0.68461	0.357633	0.594213	0.605448	0.58834
ENSG00000175206	0.767683	0.893867	NA	0.65587	0.687044	0.335726	NA	0.523738	0.817855	NA	0.573716	0.80881	0.893867	0.403614	0.0820129	0.535049	0.788968	0.862784	0.829425	0.893867	0.303456	0.502219	0.893867	0.712786	0.66547	0.893867	0.370551	0.586981	0.893867	0.436296	0.893867	0.338331	0.662036	0.51706	0.709261	0.893867	0.463233	0.864558	0.239662	0.893867	0.893867	0.893867	NA	0.403956	0.771384	0.270262	0.668357	0.65591	0.5884
ENSG00000116685	0.00522321	0.00294129	0.0066868	0.00292149	0.00313306	0.00485382	0.00393964	0.00289561	0.00215761	0.00161787	0.00589096	0.00699006	0.00438924	0.00264883	0.00389578	0.00658076	0.00533454	0.00299119	0.00293501	0.00202385	0.00237823	0.00687696	0.00808058	0.00133081	0.00394316	0.00149164	0.0017443	0.00146454	0.00493875	0.00248473	0.00389907	0.0019219	0.00197793	0.013347	0.00253056	0.00236308	0.00224323	0.00114618	0.00472	0.00477304	0.00166872	0.00186539	0.000928782	0.00515986	0.00198016	0.00114409	0.00238302	0.00186341	0.00302601
ENSG00000083444	0.00875496	0.00611827	0.00439438	0.00836368	0.0199649	0.00917066	0.00914904	0.0114546	0.00824671	0.00723935	0.0100566	0.00808278	0.00779989	0.00946007	0.00864058	0.00427334	0.00931179	0.0056096	0.00763743	0.00691454	0.014893	0.00910299	0.00649037	0.00636835	0.0138691	0.00392968	0.00489296	0.0116458	0.00904309	0.00780642	0.00594608	0.0174294	0.0053721	0.052615	0.00440463	0.00789454	0.0105828	0.0251145	0.0153946	0.0146874	0.00852694	0.00523792	0.00513572	0.0103233	0.00450008	0.0096535	0.0037578	0.00491695	0.00589478
ENSG00000116688	0.00563625	0.00397294	0.00366978	0.00228128	0.0035727	0.00599002	0.00193351	0.00369381	0.00318138	0.00756159	0.00379961	0.00610614	0.0044653	0.00408407	0.0185601	0.00791854	0.00548994	0.00505706	0.00562096	0.00244491	0.00226426	0.00324302	0.00523083	0.00562833	0.0032148	0.00748897	0.0058207	0.00321942	0.00305106	0.00498861	0.00507094	0.0135033	0.00186804	0.1079	0.00262069	0.00453017	0.00152785	0.00374088	0.00310969	0.00281794	0.00273317	0.00725523	0.00180468	0.00843063	0.00326316	0.00381074	0.0034823	0.00534929	0.00421839
ENSG00000116691	0.00446651	0.00504673	0.000958924	0.00249407	0.00133292	0.0101398	0.0117388	0.00454784	0.00553622	0.00366361	0.00230274	0.00385763	0.00431868	0.00722062	0.0022346	0.00331791	0.00581336	0.00548181	0.00469597	0.00171835	0.00180846	0.013105	0.0113382	0.00569421	0.00317459	0.00314157	0.00270615	0.00117958	0.00575007	0.0143767	0.00666089	0.0103761	0.00698322	0.0225226	0.0067077	0.00678037	0.00393862	0.00757125	0.00549951	0.00579212	0.00716024	0.00490784	0.0163278	0.00409866	0.00712907	0.0016818	0.00312384	0.00545476	0.0067737
ENSG00000120949	0.020842	NA	NA	NA	NA	NA	0.0706237	NA	NA	0.0194931	0.00460005	NA	NA	NA	2.54197e-05	NA	0.0166232	NA	0.0148604	0.02731	NA	NA	NA	NA	NA	NA	NA	NA	NA	NA	NA	NA	NA	0.0217838	NA	NA	NA	NA	NA	0.0465262	NA	NA	NA	NA	NA	NA	NA	NA	NA
ENSG00000028137	0.00337789	0.00757261	0.00141017	0.00428565	0.0176063	0.00998435	0.0124919	0.00566818	0.00547661	0.00532067	0.00707763	0.018795	0.00621998	0.0057234	0.00723565	0.00390771	0.00389321	0.00414061	0.00347466	0.00308964	0.00789153	0.00777891	0.00937087	0.00472894	0.00450365	0.00973976	0.00484048	0.00991123	0.00331458	0.00438676	0.0086975	0.00435944	0.00529911	0.00500772	0.00655262	0.0059008	0.00684005	0.0149482	0.00714212	0.00326169	0.00421417	0.00665299	0.0047356	0.00337315	0.00579368	0.00579711	0.00475976	0.00643649	0.00420391
ENSG00000048707	0.0094471	0.00485268	0.00806443	0.0110396	0.00577354	0.00477718	0.00557961	0.00600436	0.00475431	0.0064979	0.0159258	0.0134743	0.00537449	0.00371677	0.00358504	0.00418684	0.00595725	0.0116422	0.00643815	0.00848689	0.00486159	0.0114731	0.00523272	0.0044278	0.00351948	0.0062825	0.0026783	0.0066943	0.012835	0.00889912	0.00700678	0.007339	0.0060514	0.0314217	0.00413397	0.00865739	0.00817771	0.0093945	0.00658826	0.00332914	0.00938389	0.00663354	0.0193916	0.0123647	0.0102647	0.00546463	0.00756583	0.00539554	0.0101529
ENSG00000162496	0.00110055	0.00145013	0.000695144	0.00317254	0.0238729	0.00294823	0.00328303	0.000841839	0.000744683	0.00384008	0.0230533	0.00139208	0.00167189	0.00208436	0.0030488	0.00179548	0.00119174	0.00151464	0.00108404	0.00299683	0.00523735	0.00234452	0.00298449	0.00130207	0.00146961	0.00399468	0.00171241	0.0012786	0.00136527	0.0010299	0.00109255	0.00262351	0.00592581	0.0070454	0.00276648	0.0014111	0.0020287	0.00671805	0.00455291	0.00377655	0.000651833	0.00100621	0.00242922	0.00160122	0.00277649	0.00124105	0.00113633	0.00127012	0.0026392
ENSG00000276830	0.0544365	0.0769726	NA	NA	NA	NA	NA	NA	NA	NA	NA	NA	NA	NA	NA	0.0713469	0.0732471	NA	0.0429809	NA	NA	NA	NA	NA	NA	NA	NA	0.103739	0.0560206	0.0648384	NA	NA	0.0772525	NA	NA	0.0667518	NA	NA	NA	NA	NA	0.044479	NA	NA	NA	NA	NA	NA	NA
ENSG00000162493	0.0529954	0.0559638	0.0145086	0.0131335	0.0197376	0.0132431	0.0125168	0.0357728	0.0395878	0.0154813	NA	0.0277763	0.0146951	0.0268433	0.0118478	0.0167313	0.0195767	0.0485588	0.0215847	0.0101306	0.0170871	0.0217344	0.00918462	0.029351	0.0382561	0.107498	0.0193721	NA	0.0192081	0.0110602	0.0199172	NA	0.0201588	0.160965	0.0250866	0.0601185	0.0282446	0.0165443	0.0288812	0.0151485	0.00532077	0.0170068	0.12884	0.0214089	0.0236875	0.014246	0.00607533	0.0233236	0.0464954
ENSG00000116731	0.00424383	0.00481596	0.00325941	0.0093509	0.00442664	0.0097994	0.00410961	0.00290357	0.00369429	0.0052375	0.0043784	0.00523824	0.00301904	0.0048742	0.00292564	0.00564974	0.00361198	0.00498531	0.00296456	0.00630902	0.00451074	0.00843028	0.00528093	0.00346224	0.00477081	0.00326555	0.00507695	0.00716843	0.00215547	0.00432143	0.00466658	0.00439469	0.00454243	0.00669602	0.00633759	0.0030645	0.00492138	0.00600436	0.00363373	0.00314455	0.00942613	0.0031385	0.00181079	0.00332278	0.00529476	0.00276667	0.00387458	0.00375341	0.00488419
ENSG00000189337	0.00636694	0.00798996	0.00327592	0.00195513	0.00980526	0.00173735	0.00347983	0.00658487	0.00607851	0.00616041	0.0462334	0.0112909	0.00716535	0.00659282	0.00328041	0.00676146	0.00637004	0.00620632	0.00520938	0.00379027	0.00251287	0.00324952	0.00203375	0.00809702	0.00789439	0.00738114	0.00456839	0.00751422	0.00434032	0.00909218	0.00571246	0.00521155	0.00815156	0.137531	0.0548484	0.00726532	0.00286961	0.0089896	0.00315701	0.0035697	0.00444187	0.00455544	0.00578827	0.00816407	0.00806067	0.0327631	0.00764101	0.00767189	0.00964739
ENSG00000175147	0.0151812	0.0116655	0.0161558	0.00331748	0.0171346	0.00233141	0.00441461	0.0121225	0.0129041	0.0145046	0.0715002	0.015167	0.0301943	0.0128145	0.0107367	0.0267182	0.0116191	0.00886742	0.0132091	0.00513743	0.00328427	0.00475133	0.00259893	0.0140123	0.0164555	NA	0.018037	0.0109157	0.00570016	0.0180449	0.0201149	0.00852827	0.0215322	0.26719	0.133454	0.0084881	0.00499826	0.017667	0.00532071	0.00398864	0.00619104	0.0226306	0.0138183	0.0142969	0.0190282	0.069828	0.0200623	0.0123198	0.0173165
ENSG00000171729	0.0120696	0.0297948	0.00156838	0.00835338	0.0139459	0.00579587	0.00402737	0.0165819	0.0241713	0.0125585	0.0860957	0.00509303	0.0346262	0.0106388	0.00663634	0.0222873	0.0198943	0.00578365	0.0153488	0.00252509	0.00729793	0.01103	0.0173402	0.0103546	0.021156	0.0227455	0.018372	0.0365249	0.0153769	0.0105655	0.0413072	0.0111979	0.0156636	0.0600879	0.0285521	0.014716	0.0140623	0.0135688	0.0168524	0.00752442	0.0230228	0.0149698	0.00236076	0.00781706	0.0216316	0.0222785	0.0115195	0.0049796	0.0251252
ENSG00000142634	0.00487315	0.00469421	0.00493935	0.00282352	0.00916069	0.00516156	0.00773154	0.00373447	0.00377223	0.00395336	0.00566058	0.00311777	0.00563018	0.00555725	0.00789045	0.00547613	0.00444037	0.0047724	0.00503339	0.00414488	0.00318194	0.00418762	0.00333949	0.00364327	0.00396114	0.00455931	0.00742239	0.011125	0.00622737	0.00473459	0.00643967	0.00499675	0.00930123	0.00545239	0.00880255	0.00559904	0.00131953	0.0115988	0.00301533	0.00749839	0.00332367	0.00737071	0.00816474	0.00504178	0.00710001	0.00694869	0.00462276	0.00226773	0.00838251
ENSG00000142615	0.324789	0.315565	NA	NA	0.0274553	NA	NA	0.296323	0.877418	NA	NA	NA	0.527148	NA	0.12726	NA	0.346816	0.45764	0.40371	NA	0.0915149	NA	NA	NA	0.682972	0.893867	0.596234	NA	0.229413	0.597783	0.537996	0.429092	0.158472	0.842781	0.600334	0.495884	NA	0.0200777	NA	NA	NA	0.585541	NA	0.489718	0.457435	0.145795	NA	0.249104	NA
ENSG00000215704	0.198449	0.209518	NA	NA	0.0287244	NA	NA	0.248826	0.184887	NA	NA	NA	0.191361	NA	0.032625	NA	0.144986	NA	0.239827	NA	0.0806548	NA	NA	NA	NA	NA	0.450401	NA	0.104185	0.147595	NA	NA	0.0618738	NA	0.244301	0.10182	NA	0.0812778	0.0551937	NA	NA	0.0841408	NA	0.193701	0.0533659	0.036079	NA	0.128701	NA
ENSG00000132906	0.0169357	0.0105458	0.026649	0.00362019	0.00236549	0.00165503	0.00740408	0.0252074	0.0144469	0.0287913	0.000239113	0.0185958	0.0103646	0.0169997	0.00315528	0.0110868	0.0265379	0.0155566	0.0182452	0.00480968	0.00441653	0.00657767	0.0113433	0.0223421	0.017705	0.0136889	0.0236159	0.0202659	0.0147675	0.0252188	0.00829218	0.01736	0.0131606	0.00629471	0.020415	0.0105829	0.0080864	0.00477442	0.00038678	0.00132682	0.00767461	0.0168286	0.0331891	0.0145663	0.0399955	0.00566368	0.0139961	0.0223464	0.0175486
ENSG00000116138	0.00822535	0.008905	2.54197e-05	0.00165892	0.00136864	0.00585288	0.00430552	0.00378089	0.00397785	0.000465477	0.00959299	0.00944945	0.00867646	0.00413729	0.00350964	0.00278962	0.00285045	0.00951344	0.00748547	0.00366473	0.00658272	0.00557582	0.0111307	0.00286542	0.00283747	0.0020495	0.00213791	0.0175145	0.00748528	0.000311563	0.00705512	0.00928603	0.00549629	0.0102676	0.00530031	0.00995789	0.00942506	0.00421963	0.00557015	0.00473656	0.0236653	0.00363499	0.00947009	0.00372392	0.00454422	0.00298568	0.00407222	0.00811285	0.00262737
ENSG00000197312	0.00417608	0.00680644	0.00405049	0.00440794	0.00190627	0.00377257	0.00719762	0.00550642	0.00386304	0.00406383	0.00293129	0.00626589	0.00523597	0.00414463	0.00152203	0.00174754	0.00659471	0.00730787	0.00485098	0.00735689	2.54197e-05	0.0034979	0.0118802	0.00526571	0.00307334	0.00528392	0.00525448	0.00198098	0.00419254	0.00681342	0.00450165	0.00606599	0.00684596	0.0212853	0.0033462	0.00604261	0.00442386	0.00507916	0.00679044	0.00757555	0.00255895	0.00421146	0.00405062	0.00657162	0.0064747	0.00183187	0.00485112	0.00479073	0.00535982
ENSG00000116786	0.00222326	0.00241416	0.00361781	0.00300556	0.00336622	0.00299426	0.00395102	0.00320757	0.00221972	0.00267829	0.00314347	0.00326694	0.0028511	0.00370963	0.00316878	0.00516301	0.00307144	0.00229741	0.00276373	0.00306357	0.00235522	0.00275153	0.00106926	0.00283133	0.00362983	0.00197645	0.00281778	0.0048289	0.00372606	0.00503668	0.00251963	0.00243404	0.00386267	0.00393284	0.00237549	0.00318239	0.00280154	0.00428338	0.0034069	0.0029373	0.00283627	0.00733965	0.00483606	0.00372261	0.00195371	0.0039602	0.00507703	0.00661669	0.00304004
ENSG00000237938	0.0022136	0.00307333	0.00494912	0.00396648	0.00457846	0.00332627	0.00513702	0.00347248	0.00273372	0.00289666	0.00306744	0.00421783	0.00272831	0.00318212	0.00298528	0.00473024	0.00302859	0.00255956	0.00317421	0.00382352	0.00288941	0.00283642	0.00254979	0.00325851	0.0039336	0.00232851	0.0028292	0.00532198	0.00363492	0.00514251	0.00271133	0.00239969	0.00484443	0.0041881	0.00274398	0.00382841	0.00380666	0.00455	0.00459639	0.00402294	0.00405208	0.00642907	0.00514318	0.00359752	0.00230329	0.0043711	0.00584269	0.00731305	0.00290659
ENSG00000162461	0.0258908	0.0284405	NA	NA	0.031031	NA	0.0726401	0.106801	0.0965379	0.00999214	NA	0.00106849	0.0219678	0.020087	0.0414023	NA	0.102716	0.0320366	0.0571717	0.0461909	0.0768892	0.050348	NA	0.0201341	0.0637082	NA	0.0143581	0.0225724	0.0712199	0.0786653	0.0664142	0.0750928	0.0753355	NA	0.00764977	0.0557082	NA	0.0221251	0.0779582	0.048286	NA	NA	0.0153369	0.109744	0.0792933	0.080778	NA	0.0262013	0.0675566
ENSG00000162458	0.00633041	0.00284662	0.00621939	0.0187556	NA	0.0230506	0.0125341	0.00579821	0.00463592	0.00386408	NA	0.00335433	0.00626418	0.00496974	0.00574506	0.00607372	0.0060968	0.0037627	0.00474864	0.0288826	0.00407391	0.00189419	0.0077065	0.00407213	0.00485051	0.00789932	0.00304784	0.0160941	0.00622139	0.00533759	0.00463847	0.00603324	0.00742489	NA	0.00979785	0.00430419	0.00582333	NA	2.54197e-05	0.00985048	0.0290678	0.0053915	0.00748516	0.00757278	0.00566728	0.00437552	0.00123416	0.00413265	0.00372696
ENSG00000233954	0.893867	0.893867	NA	0.893867	0.893867	0.893867	0.893867	0.893867	0.893867	0.893867	0.893867	0.893867	0.893867	0.893867	0.893867	0.893867	0.893867	0.893867	0.893867	0.893867	0.893867	0.893867	0.893867	0.893867	0.893867	0.893867	0.893867	0.893867	0.893867	0.893867	0.893867	0.893867	0.893867	0.893867	0.893867	0.893867	0.893867	0.893867	0.893867	0.893867	0.893867	0.893867	0.893867	0.893867	0.893867	0.893867	0.893867	0.893867	0.893867
ENSG00000179743	0.0281383	0.0365906	NA	2.54197e-05	0.0147243	0.00809072	0.0302536	0.0203803	0.0168385	0.022103	0.0115129	0.0204815	0.0322867	0.00695863	0.00610915	0.0221161	0.0212195	0.0167731	0.0463322	0.0359284	0.0149991	0.0351857	0.0191474	0.0224392	0.0205362	NA	0.0269978	NA	0.0324311	0.0334594	0.0212731	0.0257001	0.0324519	0.0143551	0.0192937	0.0288393	0.00686068	0.0337306	0.011525	0.00514595	0.00710034	0.0227076	0.0153884	0.0243614	0.0314	0.0281206	0.0127505	0.0212319	0.0228447
ENSG00000065526	0.00348515	0.00243914	0.00126708	0.00331422	0.00217794	0.00486003	0.00322925	0.00188038	0.00194013	0.00129465	0.000188809	0.00107025	0.00236942	0.00217413	0.000356329	0.00207303	0.00209252	0.00264599	0.000571061	0.00186859	0.00138108	0.00236581	0.00548523	0.00268901	0.0017674	0.00145098	0.0054704	0.00331635	0.00138622	0.00117935	0.00243517	0.00231077	0.00176036	0.00550235	0.00284966	0.00202555	0.00738014	0.00126306	0.00180742	0.00271061	2.54197e-05	0.0017744	0.00411748	0.00326183	0.00250194	0.00177975	2.54197e-05	0.002493	0.00156662
ENSG00000116809	0.00598292	0.00336962	0.00234164	0.00193123	0.00134055	0.00669706	0.00278596	0.00504979	0.00335847	0.00642309	0.00160892	0.00460452	0.00462314	0.0056111	0.00149316	2.54197e-05	0.00399887	0.00504189	0.00570406	0.00205049	0.00376259	0.00682944	0.00103177	0.00174031	0.00571401	0.0010048	0.00222342	0.00388123	0.00118015	0.00440025	0.00323564	0.00103295	0.00311165	0.00524138	0.000442508	0.00482229	0.0062794	0.00159038	0.00118077	0.000198196	2.54197e-05	0.00149835	0.00673678	0.0032011	0.00300008	0.00411118	0.0028029	0.0033129	2.54197e-05
ENSG00000173641	0.013413	NA	0.0107068	0.0661111	0.107405	0.0746878	0.0158665	0.0168042	0.0124923	NA	0.177794	0.0328513	0.0232994	0.0241599	0.00295285	0.00758273	NA	NA	0.0196252	0.0357238	0.0347249	0.0726094	0.041905	0.0159667	0.0129977	0.12971	NA	0.0496728	0.0282039	0.0144667	0.0225595	0.0247827	0.0911658	0.146296	0.041304	NA	0.0250772	0.0963957	0.0633276	0.0330703	0.0533923	0.0141774	0.0774012	0.0272277	0.0287106	0.236424	0.00736883	0.0206517	0.00768695
ENSG00000186510	0.151908	0.114692	NA	NA	0.501099	NA	NA	0.148194	0.136375	0.121347	NA	0.0478257	0.148064	NA	0.011179	0.189139	0.183421	NA	0.194788	NA	NA	NA	NA	0.545707	0.10784	NA	0.287742	NA	NA	0.118387	0.10158	NA	0.0942898	NA	0.366914	0.0992302	NA	0.429597	NA	NA	NA	NA	0.100082	0.104686	0.101044	0.102911	0.0615894	0.0959476	0.110871
ENSG00000142627	0.00855263	0.00432625	0.00874967	0.00618806	NA	0.0264668	0.0119545	0.0113083	0.00920999	0.0113535	NA	0.0105585	0.00359949	0.000721021	0.00388139	0.00671752	0.00726807	0.00581665	0.00934191	0.0138953	0.020386	0.0197756	0.00944442	0.00427294	0.0117759	0.00538952	0.00999567	0.037678	0.0183523	0.0054167	0.00383099	0.0125157	0.0075538	NA	0.00908572	0.0105016	0.00876299	0.00685838	0.0273351	0.0183155	0.0246717	0.00516447	0.0098497	0.0057851	0.0229628	0.00419849	0.00312032	0.00317831	0.00983746
ENSG00000142632	0.0785905	0.103977	0.0726521	0.0831695	0.133963	0.0843992	0.0582703	0.0749018	0.0899378	0.055212	0.108279	0.0246763	0.0133239	0.0333853	0.0274051	0.0177267	0.0672854	0.091462	0.0605512	0.0595411	0.106244	0.108009	0.111843	0.0526027	0.0789928	0.054607	0.0949141	0.277536	0.0718769	0.0300279	0.0143032	0.0584205	0.0162814	0.152528	0.0264905	0.0961639	0.0604804	0.0764357	0.119527	0.0400267	0.134331	0.010016	0.0578993	0.0550652	0.0890705	0.0422439	0.0131747	0.0294511	0.0408031
ENSG00000237276	0.0644496	0.115203	NA	NA	0.035447	NA	0.0545877	NA	0.11896	0.0878086	NA	0.0482594	0.0155064	0.017536	0.00689569	0.00701134	0.0361372	0.0650768	0.106075	0.0421507	NA	NA	NA	0.0358288	0.0699823	NA	0.0833528	0.0235131	0.0679174	0.0328376	0.0289124	0.0470515	0.00723142	0.311647	0.0175113	NA	NA	0.0400172	NA	0.0156403	NA	0.0239284	0.0207309	0.00764001	0.0415712	0.0463147	0.121338	0.0339592	0.0572133
ENSG00000037637	0.00740381	0.00393443	0.00197557	0.0135794	0.00819256	0.0108349	0.00763689	0.00427594	0.00349388	0.00487543	0.00126243	0.0030584	0.00291239	0.00285224	0.00463521	0.00627756	0.00566733	0.00444941	0.00563637	0.0147142	0.0121163	0.00720487	0.0072045	0.00262968	0.00210291	0.00379673	0.00550017	0.00981352	0.00485139	0.00395778	0.00346882	0.00369766	0.00400873	0.00966869	0.00187328	0.00437189	0.012554	0.00821924	0.0141789	0.0143226	0.0110129	0.00269261	0.00504452	0.00397728	0.00677254	0.00843872	0.00253954	0.0049919	0.0046091
ENSG00000055070	0.00255786	0.00143891	2.54197e-05	0.0012185	0.00290936	0.00401248	0.00200528	0.00215786	0.00265197	0.00214114	0.00258183	0.00362579	0.00252882	0.00143546	0.00634519	0.00221929	0.00177314	0.00203873	0.00118075	0.00259377	0.00394136	0.00482102	0.00137786	0.00143473	0.0024957	0.00141697	0.00172997	0.00159925	0.00344444	0.0024809	0.00306918	0.0020704	0.00226828	0.00209072	0.00293187	0.00236568	0.00258667	0.00394237	0.00246405	0.0027676	0.00192641	0.00249799	0.00164796	0.00176052	0.00207475	0.00204534	0.00264723	0.00113393	0.00148491
ENSG00000187144	0.00256269	0.00151223	2.54197e-05	0.00146746	0.00375284	0.00369999	0.00216442	0.0020785	0.00268618	0.00215018	0.0025834	0.00341582	0.0026578	0.0014224	0.00301145	0.0021828	0.00174656	0.00213032	0.00123423	0.00258394	0.00380992	0.00515473	0.00148457	0.00149513	0.00254527	0.00141576	0.00177728	0.00182519	0.00355401	0.00257848	0.00307724	0.00202467	0.00227435	0.00210522	0.00303102	0.00233626	0.00274972	0.00389284	0.00213926	0.00291172	0.00203454	0.00256257	0.00170387	0.00185264	0.0020599	0.00199214	0.0026123	0.00114058	0.00146455
ENSG00000157191	0.00909271	0.00704054	0.0154475	0.0148394	0.00982509	0.020764	0.0101333	0.00837439	0.0128429	0.0065609	0.010987	0.0188594	0.00964775	0.00864688	0.01119	0.0130106	0.00606363	0.00866038	0.011875	0.0162904	0.0136198	0.0160809	0.0224252	0.00864431	0.00920164	0.0162933	0.0139738	0.0111289	0.00680737	0.00996924	0.00668397	0.0141851	0.00772445	0.0215146	0.00461434	0.00966339	0.0148614	0.0115497	0.0147243	0.0141966	0.0208943	0.0142135	2.54197e-05	0.0106315	0.00760513	0.0172591	0.00196091	0.0147813	0.00406168
ENSG00000080947	0.0106374	0.00456515	0.00414804	0.00668536	0.00452292	0.00503641	0.0034904	0.0043624	0.0059155	0.00793196	0.0365041	0.00967161	0.0132454	0.00846602	0.00601411	0.00426285	0.00858519	0.00683501	0.00986113	0.00315481	0.00355587	0.00495847	0.00740613	0.00672093	0.00539833	0.00677867	0.00738631	0.028226	0.00757326	0.0106079	0.0144923	0.00791724	0.0108016	0.0362109	0.00657614	0.00769858	0.00302769	0.0034981	0.00499638	0.00447764	0.00459186	0.00654302	0.0112494	0.01239	0.00512572	0.00268927	0.00364874	0.0205165	0.0043628
ENSG00000219481	0.370811	0.286524	NA	0.348656	0.312161	0.175469	0.220909	0.328635	0.243088	0.347241	NA	0.349567	0.340145	0.345519	0.363362	0.335416	0.366098	0.326087	0.388496	0.161962	0.344646	0.221644	0.268289	0.378967	0.256495	0.277293	NA	NA	0.270394	0.429363	0.363847	0.305916	0.221291	NA	0.464684	0.333637	0.263086	0.287897	0.295518	0.299709	0.237243	0.246781	0.473987	0.352992	0.320388	0.137762	0.313883	0.291543	0.299585
ENSG00000058453	0.0383801	0.0368254	0.0169157	0.0174509	0.0373281	0.027805	0.0306759	0.0306025	0.0326838	0.0368397	0.119593	0.0294866	0.0428347	0.0593189	0.0227135	0.0630429	0.0315229	0.0241087	0.049008	0.0217148	0.0140945	0.0291583	0.0438618	0.0274512	0.0366868	0.0719707	0.0362873	0.0564591	0.0350246	0.0295726	0.0406674	0.0395209	0.0495487	0.0706981	0.0431907	0.0425505	0.0208271	0.0316486	0.02674	0.0188998	0.0359306	0.0484787	0.0442667	0.0435613	0.0527355	0.0204962	0.0395097	0.073322	0.0484678
ENSG00000186715	0.893867	NA	NA	NA	0.893867	NA	NA	0.512816	0.893867	NA	NA	0.518356	0.893867	0.631171	0.893867	0.893867	0.893867	NA	0.893867	NA	NA	NA	NA	0.696673	0.893867	NA	NA	0.893867	0.893867	0.893867	0.893867	0.893867	0.893867	NA	0.893867	NA	NA	0.893867	NA	NA	NA	0.893867	0.535279	0.637751	NA	0.893867	0.893867	0.394912	NA
ENSG00000238142	0.496	0.658806	NA	0.526905	0.768958	0.570351	0.485774	0.81587	0.568392	0.65668	NA	0.893867	0.757988	0.597632	0.429538	0.747243	0.651013	0.596354	0.448319	0.508725	0.719996	0.614656	0.457727	0.593828	0.624774	0.893867	0.605136	0.661618	0.536926	0.548834	0.747019	0.490834	0.509087	0.348497	0.893867	0.796203	0.647584	0.734242	0.585382	0.494288	0.419691	0.528081	0.893867	0.530301	0.893867	0.619403	0.530789	0.870518	0.893867
ENSG00000117122	0.0197214	0.0184516	0.0223909	NA	NA	NA	NA	0.0494632	0.0329961	0.0347985	NA	0.061594	0.0103108	0.0244679	0.0166314	0.0138049	0.0381608	0.0313475	0.023733	NA	NA	NA	NA	0.0167609	0.0391229	0.168513	0.0791871	NA	0.0321714	0.0135042	0.00989215	0.104947	0.0288633	NA	0.0663635	0.06552	NA	NA	NA	NA	NA	0.0248721	0.0684201	0.0589969	0.0425536	0.0283264	0.00659942	0.0166278	0.0225609
ENSG00000226526	0.00481253	0.00359755	2.54197e-05	0.000426575	0.00116551	0.00111884	0.000206345	0.00365669	0.00464825	0.003507	0.0261751	0.0025248	0.00125505	0.00196238	0.00196705	0.0107986	0.00168077	0.00194569	0.00296051	0.000815072	0.000377992	0.00102353	0.000485352	0.00161767	0.00436854	0.00377899	0.00309609	0.0198576	0.00257506	0.00208819	0.00303939	0.00391391	0.002425	0.00339574	0.000834646	0.00417502	0.000507124	0.000776548	0.000491618	0.000507517	0.000372081	0.026845	0.00185413	0.00155346	0.00487282	0.00237372	0.00082825	0.00275142	0.00291871
ENSG00000159363	0.00469644	0.00371852	2.54197e-05	0.00042609	0.00117714	0.00110753	0.000208964	0.0037244	0.0047829	0.0031596	0.0260078	0.00251991	0.00117427	0.00183744	0.0018639	0.0113682	0.00178181	0.00196937	0.00303046	0.000817257	0.00038148	0.00101726	0.000475409	0.00148252	0.00403885	0.00345274	0.00317663	0.020077	0.00250393	0.00210045	0.002909	0.00396168	0.00243063	0.00343507	0.000843699	0.00440014	0.00051197	0.000764468	0.000495513	0.000511829	0.000380667	0.0268278	0.0018728	0.00164357	0.0043266	0.00236423	0.000773764	0.00257989	0.00279347
ENSG00000117118	0.00460553	0.0064462	2.54197e-05	0.00867913	0.00122352	0.00161676	0.0124417	0.000886699	0.00177704	0.00771788	0.00233755	0.00727028	0.00491879	0.000870795	0.0026258	0.00225488	0.00269846	0.00168139	0.00718923	0.000664834	0.00405314	0.0109626	0.00490952	0.00422796	0.00267304	0.00500204	0.00409604	0.00924202	0.00993923	0.004752	0.00529587	0.00235686	0.00493336	0.0182228	0.00624144	0.00452459	0.00345729	0.000885965	0.00379409	0.00841108	0.0119469	0.00268328	2.54197e-05	0.00666422	0.00427356	0.0141878	0.00521426	0.00218897	2.54197e-05
ENSG00000117115	0.0463993	0.11904	NA	0.00440554	0.00357397	0.00691446	0.0114226	0.0242797	0.0154656	0.124293	0.178823	0.0429099	0.00960463	0.0131672	0.0102179	0.0416961	0.0774034	0.127359	0.0166206	0.00772757	0.0184189	0.0053611	0.00272476	0.00995286	0.0294235	NA	0.162392	0.16485	0.0172033	0.0388928	0.0171415	0.129224	0.092312	0.149386	0.0493696	0.0793929	0.0196146	0.00351658	0.0207985	0.00848573	0.00354669	0.0420706	0.0640613	0.115037	NA	0.0295064	0.0060461	0.122343	0.0593396
ENSG00000159339	0.227497	0.208908	NA	NA	NA	NA	NA	NA	0.219214	0.12733	NA	NA	NA	NA	NA	NA	0.141177	NA	0.246535	NA	NA	NA	NA	NA	NA	NA	0.241617	0.116913	NA	NA	NA	0.118844	0.213979	0.0343966	NA	NA	NA	NA	NA	NA	NA	NA	NA	0.126707	NA	NA	NA	0.174249	NA
ENSG00000179051	0.00442838	0.0044988	0.00623981	0.00201985	0.0016255	0.00417129	0.00777833	0.00417958	0.00241251	0.00556231	0.00249482	0.00283164	0.00347233	0.00120913	0.0027262	0.00467685	0.0042625	0.00556208	0.00297602	0.00666693	0.00343132	0.00470127	0.0057081	0.00224483	0.00274446	0.00285112	0.00480065	0.00452024	0.00297071	0.00423573	0.00338471	0.0023477	0.00244612	0.00613506	0.00334897	0.00618306	0.00334854	0.00218257	0.00455823	0.0023377	0.00433964	0.00747494	0.00482214	0.00278184	0.00185762	0.00580923	0.00280497	0.00268679	0.00455693
ENSG00000074964	0.00209676	0.00437626	2.54197e-05	0.00139045	0.00493987	0.00100597	0.00296778	0.00152881	0.00371704	0.00207306	0.133343	0.00251869	0.00190219	0.0025443	0.00148253	0.002369	0.00191154	0.00414369	0.00153697	0.00171848	0.00311994	0.0018808	0.00172401	0.00111332	0.00268231	0.00226722	0.00172645	0.00208879	0.00219991	0.00274843	0.00214379	0.00372368	0.00480877	0.00793993	0.00383253	0.00413355	0.000880347	0.00435747	0.00338247	0.000635669	0.0026924	0.00252461	0.00329684	0.00270131	0.00252088	0.00212255	0.00101875	0.00267668	0.00142152
ENSG00000117154	0.026809	0.0118073	0.0353417	0.00570327	0.00728063	0.00768169	0.00834289	0.0433763	0.0312235	0.0138368	NA	NA	0.124014	NA	0.00545615	0.0116713	0.0334552	0.0108983	0.136975	0.00503239	0.00443574	0.00505304	0.010192	0.0611626	0.0549925	NA	NA	NA	0.011494	0.0479883	0.0755528	0.00991841	0.0373875	NA	0.00422729	0.0136719	0.00404396	0.00670814	0.00370019	0.00812724	0.00472011	NA	NA	0.0178042	NA	0.012277	0.104945	NA	NA
ENSG00000179023	0.893867	NA	NA	NA	NA	NA	NA	NA	NA	NA	NA	0.0679594	NA	NA	NA	0.430772	NA	NA	0.893867	NA	NA	NA	NA	NA	NA	NA	NA	0.0668692	NA	NA	NA	NA	0.0792695	NA	NA	NA	NA	NA	NA	NA	NA	0.489543	0.075844	0.141352	NA	NA	0.132322	0.0674348	NA
ENSG00000159423	0.00399765	0.00959404	0.00656318	0.0225848	0.00259572	0.0141458	0.0157335	0.00322357	0.00346734	0.0178661	0.0133554	0.00574056	0.00648521	0.0044634	0.00309716	0.00368511	0.00429713	0.00698185	0.00390337	0.0146637	0.0173053	0.0109492	0.0167696	0.00573632	0.00298759	0.00733043	0.0152259	NA	0.00670311	0.00387594	0.00748614	0.013045	0.0065625	0.017766	0.00578641	0.00643426	0.0184104	0.00445318	0.017433	0.0170629	0.0137937	0.0044974	0.0079194	0.00367395	0.00386817	0.00269124	0.00820557	0.00420776	0.00313563
ENSG00000169991	0.0192145	0.0100343	0.0375573	0.00193917	0.00448201	0.0102427	0.0043426	0.0103763	0.0136272	0.0150058	0.0203168	0.0116712	0.00557153	0.00998695	0.00522809	0.00782582	0.0257635	0.0241154	0.0145987	0.0132126	0.00555557	0.0169065	0.00199736	0.0135616	0.0157934	0.0112392	0.020157	0.028243	0.0170556	0.00929978	0.00418122	0.0108799	0.0160699	0.038491	0.0106509	0.011529	0.00149961	0.00761096	0.00966557	0.0188933	0.0121069	0.00464482	0.0135323	0.0177335	0.0131095	0.0179271	0.0117807	0.0160106	0.0138154
ENSG00000272084	0.0584273	0.0294227	0.0428545	NA	0.0327574	0.0196812	0.0856335	0.0149527	0.0324248	0.0327277	NA	0.0496111	0.0429578	0.0320274	0.00762571	0.0424422	0.0590708	0.0416838	0.0393116	0.0573379	0.0581106	0.00150425	0.0343711	0.0380164	0.0231033	NA	0.0330651	0.0266823	0.0421656	0.0263163	0.0546396	0.0230355	0.0437937	0.067804	0.0430825	0.0429375	2.54197e-05	0.0175208	0.0426069	0.0300471	NA	0.03646	0.03479	0.0401935	0.0365327	0.0129688	NA	0.0380637	0.0148816
ENSG00000127481	0.00312811	0.00361808	0.0163029	0.00186179	0.000858976	0.00162718	0.00158284	0.00386596	0.00654128	0.00158028	0.00194038	0.00188319	0.00508376	0.00372009	0.00587669	0.00258432	0.00304018	0.0034355	0.00364042	0.000803903	0.00240983	0.00246601	0.00288324	0.00278159	0.00642579	0.0016893	0.00182357	0.00293809	0.0019628	0.00504401	0.00592703	0.00300968	0.00286426	0.00282282	0.00637956	0.00272491	0.00128287	0.000708021	0.00250376	0.000844005	0.00257095	0.00242415	0.00401195	0.00192395	0.00319689	0.00210857	0.00283107	0.00334988	0.00447162
ENSG00000230424	0.0239077	0.0176733	0.00679264	0.0203628	0.0121149	0.0214548	0.00970698	0.0124051	0.0156463	0.00944112	0.0141064	0.0193218	0.0174524	0.0165518	0.00941722	0.0132423	0.0131331	0.0184227	0.017518	0.0204606	0.00955269	0.0159736	0.0129727	0.011287	0.0123815	0.0193867	0.011474	0.0339122	0.0224987	0.0101836	0.0225418	0.0132826	0.0112055	0.0371475	0.0220951	0.0286248	0.0191919	0.00774586	0.0202164	0.0173901	0.0189154	0.0147694	0.0170246	0.0162175	0.0125432	0.0159861	0.0184691	0.016368	0.0132536
ENSG00000127463	0.0194391	0.0128803	0.00144732	0.0184582	0.0120969	0.0237703	0.00878695	0.0138543	0.0152304	0.00715944	0.00700088	0.0130508	0.0151838	0.0106523	0.00897955	0.00775522	0.0100603	0.0175266	0.0119565	0.0119901	0.0129376	0.0109628	0.00421774	0.00863468	0.0122024	0.0147099	0.0106935	0.0344192	0.0196835	0.0126095	0.0184694	0.00872875	0.0106549	0.0231155	0.0161035	0.0249056	0.0152854	0.00834821	0.0147701	0.0205308	0.00758506	0.011614	0.020387	0.0140744	0.00694746	0.0167969	0.0106377	0.0137732	0.014269
ENSG00000053372	0.0184595	0.0201811	0.0143122	0.0242998	0.0188362	0.0270863	0.0343898	0.0158488	0.0192146	0.018419	0.0188805	0.0262169	0.0178699	0.0217989	0.0188038	0.0112641	0.0167567	0.0223394	0.0167059	0.0271853	0.0317393	0.0303428	0.0329953	0.0194962	0.0204127	0.0143206	0.0243411	0.0459681	0.0173779	0.0162985	0.0191207	0.0206374	0.014065	0.038287	0.0167373	0.0237475	0.0307709	0.0266355	0.0276617	0.0222205	0.0336879	0.0161003	0.0189601	0.0164185	0.0152253	0.0201667	0.0147559	0.0242891	0.0188624
ENSG00000211454	0.0880671	NA	NA	0.0545217	0.0150487	0.0148614	0.0232285	0.0257592	NA	NA	NA	0.1329	0.0385507	0.0114647	0.03167	NA	0.0990627	NA	0.058272	0.0279128	0.0381743	0.034313	NA	0.0147814	NA	NA	NA	0.00962451	0.0805831	0.0705679	0.056885	NA	0.0848268	NA	0.0475238	NA	0.00459	0.0156173	0.0367451	0.0131608	NA	0.0662539	0.0482487	NA	0.0562199	0.0281516	NA	0.0136218	NA
ENSG00000162482	0.0657892	NA	NA	0.0149574	0.021595	0.0236929	0.0103547	0.0653506	0.0932082	NA	NA	0.776006	0.0414751	0.0114308	0.00752668	NA	0.0352649	NA	0.0767625	0.0219866	0.0161681	0.0317103	0.0411234	0.0216113	0.0507938	NA	NA	0.0511075	0.0805027	0.058496	0.0416392	0.0539357	0.0625041	0.085062	0.0155623	NA	0.0186513	0.0287871	0.00936003	0.0138823	0.0569763	0.0340707	0.0248072	0.149444	0.0434168	0.0318385	NA	0.0414399	0.0326872
ENSG00000053371	0.0545657	0.0339101	0.0401062	0.0517534	0.0462852	0.0340803	0.0467476	0.0262146	0.031145	0.0273024	0.0165874	0.00822953	0.0379165	0.0209915	0.0289796	0.0150954	0.0426321	0.0307361	0.0522564	0.0546443	0.0403505	0.0319779	0.0548022	0.0186825	0.0406013	0.0244559	0.0446723	0.0111667	0.0465757	0.0588256	0.0488081	0.0342338	0.0269877	0.0568901	0.0276815	0.0561857	0.0465035	0.0482317	0.0565413	0.0395664	0.0383318	0.0305881	0.0283496	0.0257643	0.0213806	0.0231136	0.0245605	0.0209375	0.0437922
ENSG00000040487	0.00531898	0.00537232	0.0322427	0.00838357	0.00641611	0.0146575	0.00449197	0.00879576	0.0038199	0.00734113	0.00362484	0.00908616	0.00908407	0.00457748	0.00194698	0.00906985	0.0104006	0.00383527	0.0074993	0.00169322	0.0103727	0.00833675	0.00349347	0.00353948	0.00762815	0.00320853	0.00589795	0.0061972	0.00716376	0.0121097	0.00444679	0.0112952	0.00963364	0.0198225	0.00605834	0.0101981	0.00790998	0.00424046	0.00368616	0.00339979	0.0046481	0.00478996	0.00103692	0.00559002	0.00652134	0.0063877	0.00223674	0.00210997	0.00768429
ENSG00000077549	0.00263657	0.00609182	0.00180061	0.00352906	0.00226279	0.0066318	0.00497543	0.00562297	0.00606313	0.00312393	0.00305554	0.00307838	0.0029772	0.00468097	0.00262701	0.00364078	0.00278307	0.00362853	0.00282264	0.00354104	0.00232671	0.00261174	0.00539129	0.00540465	0.00692341	0.00182066	0.0051231	0.00570259	0.00286343	0.00510863	0.00250064	0.00212749	0.00361344	0.00262391	0.00495712	0.00747907	0.00246049	0.00285098	0.00166077	0.00327332	0.00124926	0.00361014	0.00201696	0.00206469	0.00257966	0.0013273	0.00199057	0.00628218	0.00591289
ENSG00000173436	0.00391668	0.00470091	0.00671715	0.000972801	0.00212247	0.00133143	0.00165204	0.00302196	0.00392648	0.00467712	0.00357052	0.00200057	0.00397276	0.00261419	0.00451301	0.00308311	0.00436402	0.0036302	0.00208072	0.00368179	0.00242484	0.00158128	0.00474814	0.00426577	0.00284456	0.00409546	0.00536135	0.00815311	0.00318472	0.00517191	0.00744528	0.00278467	0.00496911	0.00624557	0.00454873	0.00302114	0.00366605	0.00246784	0.00199603	0.00187434	0.000417852	0.00415443	0.00317247	0.00320062	0.0017161	0.00192455	2.54197e-05	0.00421589	0.00409759
ENSG00000226396	0.189648	0.0772143	NA	NA	0.0114131	NA	NA	0.0451698	0.0244074	0.0286753	0.226213	0.332849	0.154917	0.0427323	0.0123809	0.0483323	0.0693372	0.0568782	0.106261	NA	NA	NA	NA	0.0290705	0.0207465	0.218397	0.014325	NA	0.0975928	0.0157913	0.267037	0.0267917	0.0390638	0.110593	0.0646817	0.229636	NA	2.54197e-05	NA	NA	NA	0.0975661	2.54197e-05	0.0541548	0.0135494	0.00997861	0.0246692	0.0806083	0.039275
ENSG00000158747	0.00726933	0.0125186	0.00755299	0.011237	0.0225599	0.0127319	0.0102701	0.014577	0.00940069	0.0078712	0.0909278	0.0103889	0.00895297	0.018746	0.00717021	0.00842548	0.0107765	0.0141964	0.00985751	0.00916593	0.0102317	0.00548089	0.0118118	0.00958932	0.0130007	0.0162769	0.00567764	0.0249451	0.00899246	0.0133415	0.00962137	0.0319643	0.0195995	0.0685437	0.0172669	0.0136476	0.0126671	0.0200176	0.0128427	0.015727	0.00852914	0.00634584	0.018255	0.0113917	0.0128519	0.0109034	0.0109533	0.0146396	0.00846362
ENSG00000162542	0.0077371	0.00608343	0.002939	0.021538	NA	0.0111909	0.0126537	0.00888736	0.00553635	0.0112134	0.012028	0.007683	0.00887939	0.0104688	0.00471023	0.00381061	0.00830755	0.00910104	0.00740024	0.0133912	0.00714892	0.0145794	0.0205365	0.00411158	0.00874612	0.00684127	0.0136176	0.0128194	0.0131101	0.00389758	0.0100289	0.0160746	0.00699733	0.0201937	0.0127129	0.0119332	0.015252	NA	0.00745054	0.0198808	0.0126606	0.00680285	0.0166059	0.0102621	0.00943029	0.0122926	0.00540051	0.00674279	0.0086811
ENSG00000169914	0.0194241	0.021142	0.0246866	0.0272182	0.0212782	0.0464197	0.0252195	0.0150898	0.0156372	0.025616	0.014625	0.0143034	0.0124296	0.00497172	0.00190364	0.0162551	0.019465	0.0290478	0.0140068	0.031484	0.0228515	0.0327813	0.0328189	0.00816489	0.0151039	0.0118457	0.0197298	0.0326884	0.0224148	0.0140546	0.0142505	0.0110172	0.0218261	0.0282471	0.02033	0.0206566	0.0287306	0.0173314	0.0260193	0.0302221	0.0588988	0.0122187	0.0133105	0.0125365	0.0264812	0.0169856	0.00532466	0.0103768	0.0248204
ENSG00000188257	0.159211	0.0583108	0.081355	NA	NA	NA	NA	0.0618498	0.0519128	0.13042	NA	0.125557	0.0908512	0.0104788	0.0218079	0.0643187	0.105948	0.19679	NA	NA	NA	NA	NA	0.0580544	0.086002	0.267693	0.0847614	0.893867	0.0489966	NA	0.076772	NA	0.0749006	0.318654	0.0325822	NA	NA	NA	NA	NA	NA	0.0480081	NA	0.0625774	0.0738639	0.0786943	0.147262	NA	0.0348518
ENSG00000127472	0.114426	0.106386	0.0745643	0.0779626	NA	0.0517951	0.0221578	0.0512028	0.0481366	0.0192334	NA	NA	0.102328	0.0479274	0.00979469	NA	0.0751161	0.0705437	0.164265	0.027673	0.0356466	0.101557	0.0311211	0.0734102	0.0287707	NA	0.0151179	0.114498	NA	0.0328258	0.0768101	NA	0.107049	NA	0.0629931	0.220719	0.0590702	0.0631862	0.0504625	0.0525285	NA	0.0299038	NA	0.0554781	0.138971	0.111816	NA	0.0418016	0.0837968
ENSG00000162545	0.0158813	0.00778084	NA	0.00145931	0.0284171	0.0011387	0.00152947	0.00324598	0.00466013	0.0112174	NA	0.0290019	0.0101845	0.00669215	0.0209113	0.0149501	0.0224742	0.0027419	0.00135593	0.0027201	0.000909059	0.00189727	0.00598311	0.00217109	0.00552441	0.014691	0.00515192	0.0106447	0.019718	0.00910635	0.00626777	0.195655	0.0152742	NA	0.00864009	0.010658	0.00108828	0.0265584	0.00271064	0.00104588	0.0069534	0.012693	0.00147157	0.00921043	0.00331567	0.00479489	NA	0.0166895	0.00724783
ENSG00000090432	0.0134154	0.0147106	0.00418048	0.0116905	0.00756616	0.0129617	0.0134531	0.00997951	0.0116226	0.0101208	0.00814506	0.0126129	0.00758394	0.00926679	0.0051777	0.0109942	0.0119048	0.0107213	0.0113403	0.0175679	0.0129808	0.0164911	0.0193365	0.0103697	0.0120435	0.01291	0.00861607	0.0104225	0.0122838	0.0108855	0.00856322	0.00952781	0.0107523	0.0161225	0.00702443	0.0110985	0.0189173	0.00634468	0.0164956	0.0133798	0.00938009	0.00973102	0.00701032	0.0156428	0.00890939	0.0126401	0.00929039	0.0119753	0.011475
ENSG00000158825	0.184171	0.0502145	NA	0.0972003	NA	0.0498833	0.114852	0.0646421	0.0512565	0.112329	NA	NA	0.0531585	0.138939	0.0427571	0.0188678	0.0896365	0.0789091	0.186688	0.130286	0.0943787	0.0737635	0.0711543	0.112016	0.0386251	0.145101	0.0797218	0.0118813	0.0893788	0.0355411	0.0637389	0.0192529	0.0888354	0.0143774	0.041002	0.0967613	0.088341	0.0436285	0.10018	0.10447	0.119053	0.0151153	0.0730667	0.0318019	0.0260985	0.107934	0.0375803	0.0311546	0.0281961
ENSG00000158828	0.00588495	0.00505876	0.00409863	0.00571311	0.00867177	0.00690433	0.00596363	0.00404542	0.00426196	0.00585618	NA	0.00758383	0.00504796	0.00150796	0.00339156	0.00392259	0.0117887	0.00499654	0.0108556	0.00469341	0.00580243	0.00494543	0.00448187	0.00374307	0.00456524	0.00824733	0.0064795	0.0106991	0.00706039	0.0114735	0.00675849	0.0189632	0.00862278	0.00943891	0.00940717	0.00945649	0.00415191	0.00926683	0.00443176	0.00425793	0.0105323	0.0057989	0.00888365	0.00997573	0.00764995	0.0103898	0.00747369	0.00683125	0.00903321
ENSG00000117242	0.00197314	0.00187031	0.00235314	0.00282605	0.00265646	0.00360844	0.0028009	0.00212998	0.00198381	0.00400164	0.0141683	0.00648239	0.00218463	0.0022253	0.000898137	0.00275811	0.00305965	0.0019807	0.00249349	0.00401528	0.00209441	0.00270002	0.00129028	0.00163147	0.00187294	0.00388123	0.0061415	0.0139315	0.00108565	0.00420707	0.00333308	0.00381458	0.00277853	0.00446848	0.0106217	0.00177747	0.00394454	0.00128766	0.00437055	0.00318357	0.00162138	0.00302083	0.00165361	0.00249546	0.0027498	0.00375431	0.00238012	0.00283604	0.00278029
ENSG00000244038	0.00627147	0.00691874	0.00352398	0.00513248	0.00732388	0.00496945	0.00579293	0.00664202	0.00604935	0.00624383	0.00541281	0.00594315	0.00444481	0.00506683	0.00538699	0.00525753	0.0070128	0.00602038	0.00538434	0.00522141	0.00455873	0.00892362	0.00391096	0.00380962	0.00470092	0.00942667	0.00756067	0.0057751	0.00557574	0.00431081	0.00574963	0.00358745	0.00529024	0.0082131	0.00551212	0.00669299	0.00742778	0.00575482	0.00936568	0.00545853	0.0071132	0.00435823	0.00524562	0.0057663	0.00597629	0.00499367	0.0034963	0.00644349	0.00477998
ENSG00000117245	0.0207794	NA	NA	0.0203743	NA	0.0142503	0.014083	0.05488	0.0471155	0.0254252	NA	NA	NA	0.114506	0.00732829	0.0313361	0.016992	0.0266604	0.0165036	0.0104753	0.0189316	0.0105598	0.0336243	0.0260997	0.0385931	0.0682642	0.0165362	NA	0.0406574	0.0357182	0.0460945	0.0039558	0.0220996	NA	0.0343308	0.0439426	0.0155759	NA	0.0149628	0.00912978	NA	NA	0.0249416	0.0109948	0.0789294	0.0201755	NA	0.0480085	0.03055
ENSG00000127483	0.00311383	0.00130049	0.00286519	0.00131563	0.00820718	0.00107426	0.00272133	0.002832	0.00257055	0.00547673	0.00378983	0.0034629	0.00323795	0.004342	0.000672438	0.000337327	0.00122138	0.00548744	0.00624692	0.000824895	0.00505812	0.00503858	0.00767517	0.00144169	0.00267767	0.00576873	0.00969675	0.00489787	0.00373234	0.00433916	0.00652829	0.00275217	0.00321347	0.0169575	0.00101541	0.00205031	0.00272791	0.00124862	0.000301529	0.00129075	0.00316234	0.00376252	0.00585976	0.00360876	0.00285002	0.00405039	0.00350238	0.00344765	0.00428356
ENSG00000075151	0.00286244	0.0036619	0.00479057	0.0150442	0.00737564	0.00165132	0.00657595	0.00290368	0.00932401	0.00683521	0.0045423	0.00986182	0.0178863	0.0056864	0.00214287	0.00473932	0.00588345	0.016266	0.00600495	0.00242247	0.00854859	0.000501009	0.00739108	0.00595868	0.00493336	0.00329248	0.00525287	0.00238468	0.00848041	0.0122244	0.0221204	0.00209483	0.00816873	0.0122732	0.00288367	0.00894454	0.0236895	0.00887339	0.00296962	0.0143942	0.0117809	0.00905633	0.00357466	0.0170352	0.0125973	0.00291352	0.00984634	2.54197e-05	0.0109446
ENSG00000117298	0.0028989	0.00339231	0.0021411	0.00533631	0.00713224	0.00613368	0.00420899	0.00370573	0.00245226	0.00406336	0.0187628	0.00269398	0.00514286	0.00350746	0.0017736	0.00313899	0.00291592	0.00320619	0.00362428	0.00325007	0.00394002	0.00513157	0.00553165	0.00380775	0.00363533	0.00465507	0.00497362	0.00362412	0.00308412	0.00335095	0.00620961	0.00398932	0.00365513	0.0112589	0.00336814	0.00382738	0.00445236	0.00512764	0.00314966	0.00121749	0.00385149	0.0038123	0.0022574	0.00380085	0.00289202	0.00249315	0.00505058	0.001992	0.00368677
ENSG00000142794	0.223802	0.221606	0.0432835	0.0144149	0.0283574	0.064066	0.0450196	0.0527045	0.024848	0.037534	0.893867	0.0133403	0.0745807	0.0514417	0.016718	0.0707911	0.143843	0.340686	0.11366	0.019212	0.0169872	0.0286495	0.0283149	0.0497894	0.0303295	0.0326374	0.080619	0.308845	0.169461	0.029664	0.104358	0.117735	0.0265968	0.243204	0.0297488	0.489505	0.0310031	0.0272498	0.0217334	0.0106383	0.124187	0.105649	0.0773791	0.252032	0.0070951	0.00852865	0.0448413	0.0364547	0.0366096
ENSG00000162551	0.0208459	0.0192868	0.0119084	0.0171819	0.0132872	0.0155387	0.0197588	0.0399532	0.0336666	0.0110929	NA	0.0195058	0.041054	0.0234265	0.00296279	0.0159525	0.0151742	0.0162857	0.0189395	0.0159917	0.0115797	0.0186479	0.0229484	0.0145476	0.0375358	0.239578	0.017644	0.00769683	0.0252784	0.024875	0.0590639	0.00350685	0.0293005	0.00484119	0.0093493	0.0256438	0.0123421	0.0217702	0.0151258	0.0169681	0.033431	0.00981222	0.0124614	0.00358513	0.0509998	0.0180663	0.0300456	0.0180754	0.0394721
ENSG00000076864	0.0756222	NA	NA	0.00522017	0.00450393	0.00679504	0.00279027	0.0104414	0.0365946	0.00855997	NA	0.00585888	0.0266895	0.0210533	0.0048956	0.0499537	NA	NA	0.013738	0.00280819	0.00220288	0.00210855	0.00413481	0.0474479	NA	NA	0.0317357	0.0114825	0.0145744	0.0154789	0.0314763	0.0896221	0.00608739	0.329455	0.00232739	NA	0.00155084	0.00596605	0.00249669	0.0029126	0.00469794	0.0499164	0.00396319	0.00788277	0.041559	0.00347695	0.013241	0.00124886	0.0696925
ENSG00000090686	0.00584863	0.00721034	0.00707829	0.0477309	0.0177777	0.0422516	0.0502296	0.016959	0.0134236	0.009254	0.0197542	0.00876548	0.0064972	0.00831125	0.00769523	0.010792	0.00825008	0.00745859	0.00611375	0.0437271	0.0168877	0.0519926	0.0315569	0.00991	0.0126239	0.00530185	0.0123978	0.0214556	0.0111409	0.0134428	0.0100787	0.016126	0.0173308	0.0158762	0.016515	0.00789442	0.0335602	0.01211	0.0346002	0.0354092	0.0206166	0.0103865	0.012294	0.00748097	0.0116045	0.0129026	0.00474271	0.0077729	0.00928515
ENSG00000187942	0.00668587	0.00359483	0.00301139	0.0169143	NA	0.0237995	0.0213545	0.00461859	0.00413448	0.00456993	0.284177	0.00595733	0.00632913	0.00468737	0.00685516	0.0045411	0.00563838	0.0038452	0.00753191	0.015785	0.022721	0.0131057	0.013511	0.00343934	0.00421862	0.00352349	0.00310522	0.0039301	0.00576819	0.00533802	0.00629775	0.00435122	0.00668817	0.0818137	0.00678064	0.00412727	0.0370432	0.0395105	0.02518	0.0147372	0.0184851	0.00515312	0.00484091	0.00610828	0.00813388	0.0102203	0.00602252	0.00663239	0.00648484
ENSG00000142798	0.00744277	0.00409545	0.00270672	0.0128059	0.0723034	0.0197969	0.0167834	0.00603035	0.00377687	0.00422092	0.0481853	0.00911442	0.0102352	0.00557104	0.0101051	0.0075783	0.00566741	0.00492144	0.00842846	0.00730408	0.0223665	0.0235125	0.0108869	0.00527269	0.00465837	0.00223742	0.00475833	0.0122142	NA	0.00804711	0.0104459	0.00593151	0.007337	0.392839	0.00619932	0.00398933	0.0220676	0.0407967	0.01933	0.0297986	0.0168069	0.00601302	0.00808599	0.00632838	0.00896089	0.0206144	0.00690646	0.00744393	0.00645815
ENSG00000219073	0.893867	0.893867	NA	NA	NA	NA	NA	0.893867	0.893867	NA	NA	NA	0.893867	0.893867	0.211881	NA	0.893867	0.893867	0.893867	NA	NA	NA	NA	0.797316	NA	0.893867	0.893867	NA	0.893867	0.893867	0.893867	0.893867	0.893867	NA	0.893867	0.893867	NA	NA	NA	NA	NA	0.893867	NA	0.893867	0.893867	NA	NA	0.368114	NA
ENSG00000142789	0.893867	0.893867	NA	NA	0.893867	NA	NA	0.893867	0.893867	0.893867	0.893867	0.0900806	0.893867	0.893867	0.893867	NA	0.893867	0.893867	0.893867	NA	NA	NA	NA	0.893867	0.893867	0.893867	0.893867	0.893867	NA	0.893867	0.893867	0.893867	0.893867	0.893867	0.893867	0.893867	NA	0.893867	NA	NA	NA	0.893867	NA	0.893867	0.893867	0.893867	0.51037	0.492458	0.893867
ENSG00000218510	0.0442529	0.129377	0.0378621	0.0331663	0.037044	0.0197029	0.0442876	0.120711	0.0845061	0.119589	0.0436642	0.0791325	0.0262455	0.0506128	0.00371748	0.0489216	0.0630521	0.0888424	0.0484773	0.036228	0.0398358	0.0292494	0.0289305	0.0697846	0.096852	0.0206793	0.155585	0.0377113	0.0322248	0.0489884	0.0268284	0.0366585	0.0228226	0.0421497	0.0466058	0.120418	0.0331662	0.0293752	0.0580551	0.0543771	0.0138899	0.0255327	0.0458069	0.0609224	0.0315174	0.021639	0.0384512	0.0510242	0.0806956
ENSG00000070831	0.0428594	0.0733497	NA	0.127536	0.0235406	0.0308454	0.0197776	0.00604138	0.0876317	0.0936268	0.231887	0.022315	0.0790718	0.150743	0.0420162	0.0286828	0.115741	0.0210532	0.051382	0.0291091	0.0200564	0.0239011	0.0511455	0.16262	0.133269	0.101289	0.0756412	0.121664	0.055298	0.0788264	0.0733596	0.0924123	0.0442087	0.169664	0.145089	0.156179	0.0399399	0.0367063	0.0239733	0.0437952	0.181302	0.0763862	0.00851706	0.0545873	0.0423958	0.0996796	0.0370903	0.0787025	0.0230757
ENSG00000184677	0.00569504	0.00487357	0.0366992	0.0161136	0.00283958	0.00451313	0.00545656	0.00419023	0.0126655	0.00552323	0.0063723	0.0133852	0.00730036	0.0049039	0.00303779	0.00273956	0.00390291	0.00344087	0.00651788	0.00678183	0.0033138	0.00354736	0.00764147	0.00565838	0.0243346	0.00190687	0.00401695	0.00408332	0.00582875	0.0141399	0.003755	0.0043915	0.00377404	0.0150444	0.0162084	0.00660362	0.00715261	0.0042515	0.00930237	0.00360756	0.00547489	0.00879282	0.00692966	0.0063904	0.0019721	0.00375097	0.00469521	0.00449952	0.00333647
ENSG00000173372	0.00571228	0.00339478	NA	0.0056968	0.0161581	0.0254024	0.00717797	0.00229121	0.00573917	0.00541629	NA	0.00720573	0.0215183	0.00401109	0.00678483	7.81859e-05	0.00408351	0.00426472	0.00665332	0.00994159	0.0177042	0.00594661	0.00364389	0.00432471	0.00364134	NA	0.00866369	0.00391333	0.00380281	0.0057499	0.0106435	0.0025479	0.00399172	0.0576977	0.00450077	0.00267607	0.00252313	NA	0.00629632	0.00785852	0.00595697	0.00385807	0.00151061	0.00609221	0.0294924	0.00509762	0.02262	0.00337988	0.00573128
ENSG00000159189	0.0116694	0.00909886	0.00715579	0.00858544	0.0115471	0.0109949	0.00784472	0.00831017	0.00983505	0.00998042	NA	0.00895452	0.0157979	0.0107204	0.00747781	0.00730499	0.00741913	0.0110125	0.0110058	0.00847147	0.0112503	0.00668359	0.00856447	0.00749038	0.00792994	NA	0.00748169	0.0187638	0.0108645	0.00518868	0.015073	0.00894259	0.0116043	0.0281057	0.00898765	0.0113353	0.00629371	0.00901234	0.00948821	0.00942416	0.00654224	0.00767823	0.0168416	0.00970568	0.0186753	0.00619679	0.0281927	0.00924052	0.0116947
ENSG00000173369	0.00539225	0.00420556	NA	0.0216292	NA	0.0421039	0.0108359	0.0154076	0.00744333	0.00739825	NA	0.0182931	0.0160359	0.00878054	0.0123001	0.0219544	0.0118815	0.00187128	0.0057169	0.00546605	0.0259224	0.0169374	0.0064133	0.00784005	0.00773483	NA	0.00329654	0.00142809	0.00888475	0.0142289	0.031537	0.00359247	0.00690321	0.109348	0.00195088	0.0154336	0.0479873	0.0668235	0.032717	0.000225139	0.00570515	0.00655382	0.0011301	0.0067781	0.00374195	2.54197e-05	0.00705484	2.54197e-05	0.00352747
ENSG00000133216	0.0513258	NA	NA	0.0292834	NA	0.018744	NA	0.0175649	NA	0.0279699	NA	NA	NA	0.00813027	0.0144135	NA	NA	NA	NA	NA	0.0119198	0.00956792	0.021416	0.00335191	NA	0.0235488	NA	NA	0.0178282	0.0342824	NA	NA	0.0213206	NA	0.310338	NA	0.0170868	NA	0.0200488	0.0133488	0.00606757	NA	NA	0.0354006	0.0201189	0.0063305	NA	NA	NA
ENSG00000004487	0.00738325	0.00563497	0.00461148	0.00411637	0.00584118	0.0134234	0.0167712	0.00676127	0.0083071	0.00620655	0.0140837	0.006556	0.00455245	0.00638147	0.00380157	0.00507624	0.00726355	0.0115318	0.00843249	0.0134551	0.0041834	0.00347283	0.0261886	0.00398264	0.00593765	0.00775372	0.00960502	2.54197e-05	0.00794895	0.0123934	0.00719396	0.00870756	0.00618429	0.0372336	0.00644997	0.00718187	0.0125614	0.00200017	0.0123523	0.00778866	0.00863404	0.00549867	0.00712866	0.00930357	0.00485701	0.00740658	0.0064399	0.00602385	0.00273263
ENSG00000169641	0.00520804	0.00486171	2.54197e-05	0.0112315	0.0151977	0.00489271	0.00398352	0.00215891	0.00325504	0.00310561	0.00585323	0.00163356	0.0041763	0.0024692	0.00143906	0.00212508	0.0035484	0.00593289	0.00669922	0.00566997	0.00578113	0.00694412	0.00857113	0.00130428	0.00424983	0.00280935	0.00288471	0.00377147	0.0070725	0.00444872	0.00474743	0.00290425	0.00430524	0.0520264	0.00235559	0.00291244	0.00457662	0.0184066	0.00608475	0.00424886	0.00367542	0.000995234	0.00416511	0.00230131	0.000328514	0.00268816	0.00423633	0.0051585	0.000304348
ENSG00000261326	0.00636584	0.00767242	NA	NA	0.00446564	NA	NA	0.00347887	0.0151328	2.54197e-05	0.0108884	0.0086571	0.0026865	0.00847663	0.00685229	0.00257493	0.0133342	0.0113482	0.0227629	2.54197e-05	NA	0.0276055	NA	0.00416543	0.000347356	0.00127836	NA	NA	0.00615348	2.54197e-05	0.0197567	0.00227521	0.00698252	NA	0.0131927	0.00565103	NA	0.0160617	0.0138563	2.54197e-05	NA	0.0209618	NA	2.54197e-05	0.00261508	0.00949895	0.00511977	0.0105732	2.54197e-05
ENSG00000125944	0.011963	0.00416326	NA	0.0282216	0.00608567	0.0219869	0.0124001	0.0201448	0.00650212	0.00932737	0.00366513	0.00198368	0.00577644	0.00499976	0.00528802	0.00402463	0.00379457	0.0100911	0.00900145	0.00226401	0.00906618	0.0142703	0.00839815	0.00128793	0.00241319	0.000721912	0.00717252	0.0406287	0.00893552	0.0139652	0.0196981	0.00303833	0.00453483	0.0787852	0.00574126	0.00225046	0.0369193	0.00242333	0.00579221	0.0041645	2.54197e-05	0.00560199	0.0105289	0.00231125	0.00373871	0.00761309	0.00379854	0.00549716	0.00307814
ENSG00000125945	0.0360619	0.0741449	NA	0.0139513	0.00158732	0.00112991	0.000730285	0.065767	0.0521474	0.0283394	0.00710449	0.268249	0.0513632	0.0794001	0.010021	0.0534808	0.0144516	0.0353613	0.0287795	0.00273375	0.0159149	0.00755061	0.0178189	0.13546	0.0881433	0.00554791	0.0204348	0.175497	0.0613183	0.125826	0.0498159	0.0307177	0.0545786	0.0575079	0.149574	0.0485716	0.00961985	0.00403543	0.00638163	0.00201019	0.00893068	0.00990499	0.0430352	0.0474513	0.108092	0.0728318	0.127838	0.179976	0.047558
ENSG00000249087	0.0144533	0.0518326	NA	0.0312583	0.0263008	0.0252048	0.0244079	0.0287626	0.0234746	0.0258361	NA	0.492129	0.0893212	0.0294528	0.0230645	0.042761	0.034217	0.0428466	0.0294105	0.022674	0.034168	0.0290593	0.0567468	0.108108	0.0386345	0.0191019	0.00292858	NA	0.0306545	0.0667828	0.0777761	0.0176211	0.0164986	NA	0.0951835	0.0502327	0.0248155	0.0136558	0.0151601	0.0112768	0.045829	0.0100279	NA	0.0595747	0.0589255	0.0164874	0.133304	0.126042	0.00659237
ENSG00000204219	0.0268269	0.0433853	0.0613445	0.0854769	NA	NA	NA	0.0686433	0.0691673	0.0143929	NA	0.0199898	0.0169262	0.0295665	0.0250929	0.042403	0.0369718	0.0489773	0.0308353	0.0636268	0.139761	0.0871284	NA	0.0366032	0.0656157	0.0757609	0.0174177	0.0297934	0.0452837	0.0445214	0.0165191	0.0417395	0.0338805	0.0598312	0.0261867	0.042536	0.07425	NA	0.106008	0.0548627	NA	0.0186049	0.0195774	0.0267677	0.0504904	0.0413337	0.0218527	0.0282308	0.0473026
ENSG00000088280	0.00833701	0.00860053	0.00213874	0.000130981	0.0272183	0.0163067	0.00798595	0.00260911	0.00449782	0.00673966	NA	0.00337641	0.00347983	0.00372005	0.00060469	0.00521647	0.00633107	0.00718616	0.00835459	0.00152678	0.00129911	0.00527085	0.00289603	0.00378605	0.00301654	0.0143951	0.0144753	0.0347438	0.00330961	0.00900293	0.00518453	0.0158833	0.0100706	NA	0.00590064	0.00640699	0.00253843	2.54197e-05	0.00240367	0.00540575	0.0134165	0.00702132	0.00566852	0.00798124	0.00277879	0.00536663	0.00610629	0.00223156	0.00169976
ENSG00000007968	0.124557	NA	NA	NA	NA	NA	NA	0.00736715	NA	NA	0.00755664	NA	0.0331554	0.0093456	0.00447295	0.0175403	NA	NA	NA	NA	NA	NA	NA	0.00648985	NA	0.00126518	NA	NA	NA	NA	0.0336333	0.00897852	0.158298	0.0158209	NA	NA	NA	NA	NA	NA	NA	0.00769776	NA	0.0110862	NA	NA	0.0051014	0.0184947	NA
ENSG00000117318	0.00190701	0.000967763	6.67712e-05	0.00542672	0.0109382	0.00646108	0.00340121	0.00213097	0.00197569	0.00162493	0.00775304	0.00671185	0.0034309	0.00093282	0.00211639	0.000859397	0.00221925	0.00143597	0.00153339	0.0034425	0.0020031	0.00408237	0.00341106	0.00194702	0.00149985	0.00306589	0.00178637	0.00386423	0.0011054	0.0015823	0.00325074	0.00307221	0.00206581	0.0148108	0.0030176	0.00104443	0.00366948	0.00384416	0.0048458	0.00388553	0.00642904	0.00222221	0.00145919	0.00167897	0.00174443	0.00191148	0.00128792	0.00254741	0.00285721
ENSG00000142676	0.00728845	0.00354699	0.0228637	0.00181608	0.00641357	0.00110157	0.004771	0.00235316	0.00165637	0.00443038	0.00555658	0.000903952	0.00763805	0.00459395	0.0030466	0.0120237	0.00840143	0.000558832	0.00117551	0.00253929	0.00109194	0.00138014	0.00189866	0.00411262	0.00367596	0.00313115	0.0011541	0.00393753	0.00538321	0.010636	0.00967931	0.0016764	0.00307659	0.0057749	0.000728763	0.0018983	0.000950157	0.0015598	0.00139397	0.00180828	0.00122237	0.00554878	0.000257891	0.00567455	0.0108362	0.00316356	0.000957388	0.000908451	0.000962085
ENSG00000011007	0.00393757	0.00355561	0.00259333	0.00775567	0.000564412	0.00863646	0.00770816	0.00676783	0.00272839	0.00467066	0.00337288	0.00255456	0.00350591	0.0122819	0.00231467	0.00531732	0.00304707	0.00411354	0.00268837	0.00981401	0.00975009	0.00630483	0.0216386	0.00211348	0.00132217	0.00167209	0.00353887	0.00650221	0.00274564	0.00250457	0.00482397	0.00420304	0.00403882	0.0203449	0.00200973	0.00506625	0.00777098	0.00151664	0.00776667	0.00437969	0.00044168	0.00170116	0.0152357	0.00250226	0.00203042	0.00751986	0.0023909	0.00254858	0.00180655
ENSG00000057757	0.00345506	0.000484063	2.54197e-05	0.00182717	0.00133733	0.00241142	0.00163946	0.00318531	0.0013961	0.00208844	0.00290603	0.00215025	0.00171798	8.62504e-05	0.00218844	0.000872027	0.00391687	0.00302375	0.00392042	0.00244665	0.00339732	0.0056894	0.0058963	0.00223846	0.00140824	0.00163516	0.00257084	0.00435902	0.00190788	0.00167512	0.00186792	0.0019735	0.00377349	0.0106667	0.00238863	0.00309848	0.00186278	0.00427906	0.00177254	0.00163182	0.00565244	0.00187152	0.00536321	0.00283486	0.00186732	0.00303832	0.000675048	0.00196529	0.00205853
ENSG00000011009	0.00425382	0.00405735	NA	0.000973711	2.54197e-05	0.00343125	0.00402856	0.000872993	0.00353245	0.0071953	0.00317656	0.00232825	0.00320014	0.00251992	0.00512205	2.54197e-05	0.000455459	0.0104823	0.00401674	0.00275171	0.00096393	0.0161665	2.54197e-05	0.000862998	0.00256191	0.00306024	0.0042374	0.00149876	0.00221349	0.00683077	0.00161676	0.00297485	0.000440472	0.0025784	0.000409034	0.00589712	0.00166269	0.00478284	0.00523995	0.00127579	0.00298177	0.00210815	0.00203261	0.00112728	0.000551974	0.000815364	0.0042212	2.54197e-05	2.54197e-05
ENSG00000117308	2.54197e-05	NA	NA	NA	0.0159281	NA	NA	NA	NA	NA	NA	0.0160101	0.0354677	NA	NA	NA	NA	NA	0.00919509	0.00216025	NA	0.00973427	NA	6.13777e-05	NA	0.083792	NA	0.0475185	NA	NA	0.023525	0.0440252	0.0247553	NA	NA	NA	NA	0.0140331	0.0294071	2.54197e-05	NA	0.00479046	NA	0.0174808	NA	2.54197e-05	0.0350348	0.00781349	NA
ENSG00000117305	0.0115198	0.00402364	NA	2.54197e-05	0.0142708	0.00734508	0.00869838	0.00938294	0.00485475	0.00910331	0.0026425	0.00651919	0.00470935	0.00440562	0.0029219	0.0125102	0.00717197	0.00554318	0.00945401	0.00319784	0.0148705	0.00926451	0.00951112	0.00611719	0.00562586	0.00236332	0.00731299	0.00199697	0.0103421	0.0110299	0.00684165	0.00601472	0.00651057	0.0168849	0.00282991	0.00388405	0.0115596	0.00330056	0.00750702	0.010576	0.0090787	0.00756605	0.00295315	0.00544006	0.0115475	0.00369456	0.00348849	0.00421309	0.00753815
ENSG00000179163	0.0151885	0.00799505	0.0161037	NA	0.00737668	0.0458492	0.0177996	0.00683155	0.0103861	0.0095334	0.0626455	0.0120686	0.0133351	0.00961218	0.00175187	0.0152857	0.00831528	0.00820519	0.0124466	0.017925	0.0125557	0.0144268	0.0332477	0.00823198	0.00853636	0.0712504	0.0491397	0.0133642	0.018493	0.00831255	0.0114185	0.0233465	0.00477063	0.0476518	0.00173671	0.0110756	NA	0.0104204	0.0313932	0.00396243	0.0439293	0.00964092	0.011416	0.00956521	0.00413271	0.00606338	0.00695779	0.00401537	0.00861173
ENSG00000189266	0.00868096	0.0233871	0.00348728	0.0105725	0.00623428	0.00716664	0.0124168	0.0090792	0.00670811	0.00952077	0.00357928	0.00634675	0.00783315	0.00609642	0.00405954	0.00961156	0.00811185	0.0126152	0.00778407	0.0119658	0.00605855	0.0137142	0.0155008	0.00772992	0.00848266	0.00989076	0.00443136	0.00675723	0.00544464	0.0107272	0.00680491	0.0050938	0.00696008	0.00622821	0.00661668	0.0144479	0.0167278	0.0075963	0.01305	0.00616958	0.0130174	0.00833385	0.00647856	0.0149403	0.00378804	0.00387459	0.00840181	0.00829335	0.00647587
ENSG00000188529	0.00376303	0.0128754	0.00836627	0.00626893	0.00209133	0.00216083	2.54197e-05	0.00188604	0.00410388	0.00447047	0.00387996	0.00181905	0.00362298	0.00348204	0.00167213	0.00400083	0.00328109	0.00569636	0.00565704	0.0101406	0.00188475	0.00740465	0.00911483	0.00210195	0.00318887	0.00246721	0.0023466	0.00491366	0.0044366	0.0020678	0.00351559	0.00402646	0.00223985	0.0132675	0.000854564	0.00612531	0.010813	0.00148862	0.0122954	0.0062594	0.00465731	0.00317279	2.54197e-05	0.00685434	0.000828371	0.00378063	2.54197e-05	0.00498098	0.000975356
ENSG00000142661	0.0871023	0.0244482	NA	NA	NA	NA	NA	NA	0.599154	0.00427597	NA	0.0581949	0.0721457	0.00910141	0.0181585	NA	NA	0.0199253	0.0377202	NA	NA	NA	NA	0.0289057	0.350005	NA	0.00336891	NA	0.0315183	0.0705437	0.070738	NA	NA	NA	NA	0.035737	NA	NA	NA	NA	NA	NA	0.0282867	0.0698208	NA	NA	0.00898175	NA	NA
ENSG00000185436	0.0870475	NA	NA	0.0507254	0.00523818	0.0287542	0.0297444	2.54197e-05	0.210936	0.291321	0.0372012	0.00499305	0.0211682	0.00814734	0.0215438	0.0316447	0.0445095	0.0279846	0.00907087	0.0178174	0.0409253	0.0108931	0.0262898	0.0151341	0.205574	NA	0.019145	0.0166567	NA	0.01671	0.0179872	0.0123891	0.00923727	0.0172028	0.0196324	0.108487	0.055426	0.00473778	0.0346366	0.00919035	0.0147924	0.0333988	0.010747	0.02452	0.0831418	0.003704	0.00517204	0.011702	0.331368
ENSG00000158055	0.0267224	0.026031	0.00712509	0.00173896	0.00380241	0.0106782	0.0106517	0.031971	0.0233776	0.00715697	NA	0.0217006	0.0065757	0.0132649	0.00456731	0.00432757	0.0187521	0.0563399	0.015099	0.00907383	0.000419439	0.00530698	0.00610736	0.0120824	0.0158471	0.00344005	0.00415732	NA	0.0344659	0.0280744	0.00667931	0.0244018	0.0184168	NA	2.54197e-05	0.0333814	2.54197e-05	0.00653916	0.0032368	0.0124046	0.0280323	0.0044687	0.0145306	0.00309043	0.0269913	0.00113812	0.00417824	0.0165351	0.0162472
ENSG00000001460	0.0367243	0.0522167	0.0114753	0.0149539	0.00562123	0.0137794	0.00818635	0.0226236	0.0240424	0.0159826	0.0592941	0.0171318	0.0243993	0.0165319	0.00499166	0.019704	0.0190273	0.0373807	0.0179188	0.00671686	0.00708516	0.00195809	0.0178855	0.01171	0.0235809	0.0311343	0.0219551	NA	0.045536	0.0302107	0.0280372	0.0128407	0.02053	0.0781701	0.00868866	0.0415337	0.0182374	0.00838887	0.00380436	0.00961009	0.01674	0.0115087	0.0241086	0.0207883	0.0244294	0.0114762	0.00978416	0.0154248	0.0181011
ENSG00000001461	0.0159961	0.0163373	0.00186096	0.00119778	0.00290377	0.00406925	0.00191958	0.00545786	0.00684565	0.00989234	0.0092912	0.00555547	0.0115562	0.00740168	0.022556	0.0144526	0.011123	0.0199942	0.0113063	0.00250005	0.000835538	0.00227148	0.00362495	0.00481411	0.00960618	0.00776073	0.00467098	0.0111262	0.0268332	0.00428132	0.0107894	0.00798357	0.00406029	0.0137476	0.00556243	0.0506968	0.00322238	0.00350795	0.00305171	0.00208729	0.00249051	0.00823674	0.0071985	0.00472775	0.00702292	0.00570499	0.00617769	0.00455369	0.00548648
ENSG00000117602	0.02066	0.0549192	NA	0.0251724	0.00469501	0.0155838	0.000804164	0.0124667	0.0111472	0.0219238	0.0342946	0.00830743	0.00658202	0.00690431	0.019454	0.00596377	0.0186385	0.036103	0.0126105	0.00625451	0.0360691	0.00950638	0.00874333	0.00720594	0.0205387	0.00643341	0.0123031	0.0597137	0.0182538	0.00925962	0.00986141	0.0065933	0.009206	0.00928467	NA	0.0554257	0.0288386	0.00412761	0.00570219	0.00973238	0.00266851	0.0049938	0.00751091	0.00659863	NA	0.00728203	0.00883927	0.00827193	0.0270852
ENSG00000184454	0.0842824	NA	NA	NA	NA	NA	NA	NA	0.0145418	NA	NA	0.0342078	0.0535608	0.181642	NA	NA	NA	0.0814839	0.0658747	NA	NA	NA	NA	0.0341001	0.027992	NA	NA	0.0766817	0.025811	0.0767887	0.0514622	NA	0.0528921	NA	NA	0.0907538	NA	NA	NA	NA	0.111104	0.0274268	0.0256483	0.0376722	NA	0.0329887	0.0215473	0.0327052	NA
ENSG00000133226	0.0101407	0.00772284	NA	0.0275805	0.00297657	0.0904515	0.0151703	0.0421537	0.00383754	0.00791669	0.00347946	0.00526935	0.0230612	0.0077492	0.00805268	0.0083511	0.00404222	0.00776134	0.0213925	0.00211619	0.00329437	0.0120567	0.0718611	0.00303045	0.00300095	0.0168677	0.00575844	2.54197e-05	0.012381	0.0109219	0.00954681	0.00396926	0.0157142	0.0107944	0.00613432	0.0169088	0.0102955	0.00149004	0.00169977	0.0107613	0.0335047	0.0070211	0.00704658	0.0145726	0.00363083	0.00666428	0.0320703	0.00375017	0.000594248
ENSG00000169504	0.00102342	0.00129583	2.54197e-05	0.00203962	0.00509751	0.0031355	0.00185336	0.000681459	0.000881918	0.00216705	0.0124269	0.0108289	0.00327337	0.000752263	0.00326463	0.00103391	0.0012944	0.000844361	0.00135467	0.00098715	0.00011386	2.54197e-05	0.000968625	0.00077945	0.00054209	0.00169854	0.00163156	0.0031603	0.00110265	0.00204289	0.00522456	0.00251473	0.00143589	0.00524218	0.00286134	0.00131479	0.00210325	0.00399355	0.000610541	0.00150115	0.00311017	0.00278305	0.00148708	0.00142856	0.0014404	0.00368315	0.00231929	0.000892572	0.000576356
ENSG00000020633	0.0312303	0.0256626	NA	NA	NA	NA	NA	NA	NA	NA	0.00898092	NA	0.00955087	0.00818708	0.013482	NA	0.0151179	0.0346939	0.0247279	NA	NA	NA	NA	0.0127975	NA	NA	NA	NA	NA	0.033954	0.00976895	0.00881307	0.025238	0.00659221	NA	0.050814	NA	NA	NA	NA	NA	0.00948334	NA	0.00988898	NA	NA	0.00426279	0.0127252	NA
ENSG00000117614	0.00526492	2.54197e-05	NA	0.0717016	0.0522457	0.0159888	0.0150441	0.00325722	0.00261343	0.00154725	0.00174435	0.0103645	0.0091718	0.000596628	0.00381574	0.0368486	0.00254498	0.0217573	0.00573036	0.0331771	0.0430625	0.0637072	0.0480603	0.00148669	0.00285812	0.00665188	5.97597e-05	0.00498087	0.01779	0.00894941	0.00718313	0.00149085	0.0019017	0.00916887	0.0048902	0.00209948	0.00590348	0.0289278	0.0500269	0.0353538	0.0610005	0.00267728	2.54197e-05	0.000320055	0.000393291	0.0303824	0.00248134	0.00387959	0.00144258
ENSG00000117616	0.00811045	0.0046657	0.00496489	0.00254136	0.00457523	0.00754414	0.00309469	0.00303746	0.0183109	0.00355354	0.00528591	0.00527198	0.00503624	0.00355845	0.00439515	0.00431149	0.00317664	0.00561998	0.0168938	0.00386168	0.00339633	0.00539769	0.00306569	0.00291274	0.00346144	0.00505586	0.00326351	0.00398866	0.00365653	0.0032505	0.0112455	0.00349898	0.00672596	0.00809986	0.00334416	0.00481988	0.00320502	0.00363147	0.00285151	0.00435491	0.00502097	0.013426	0.00270276	0.00616992	0.00340918	0.003724	0.00475539	0.00295623	0.00528845
ENSG00000261349	0.204595	NA	NA	NA	NA	NA	NA	0.358858	NA	NA	0.0066101	NA	NA	0.272343	NA	NA	NA	NA	0.204582	NA	NA	NA	NA	0.214418	NA	NA	NA	NA	0.0717765	0.121031	0.139354	0.215812	0.168662	0.0913456	NA	0.197075	NA	NA	NA	NA	NA	NA	NA	0.119345	0.156216	NA	0.153557	NA	NA
ENSG00000187010	0.236264	0.0257206	NA	NA	NA	NA	NA	NA	NA	0.158642	NA	NA	0.102362	0.186733	0.0248084	NA	0.0272467	0.0871253	0.121632	NA	NA	NA	NA	0.0619457	0.0299074	0.0257759	NA	NA	0.224536	0.0506477	0.0593799	0.043281	0.167408	0.108329	NA	0.0517434	NA	NA	NA	0.0144255	NA	NA	NA	0.0454672	NA	NA	0.0179263	0.0898328	NA
ENSG00000183726	0.0153202	0.0241083	0.0126143	0.0155421	0.0144593	0.0204518	0.0129438	0.0132805	0.0169678	0.0154472	0.0123298	0.009959	0.0116351	0.00854852	0.0111439	0.014089	0.0119668	0.011916	0.0105086	0.0131833	0.016199	0.0145793	0.0111372	0.0108786	0.017506	0.015739	0.0167533	0.0157077	0.0184981	0.0115535	0.0118797	0.00988067	0.0117924	0.0105821	0.0060708	0.0169599	0.019943	0.0114984	0.0209538	0.0125938	0.0128092	0.0125807	0.0083351	0.012153	0.0154255	0.0115204	0.00643614	0.0124805	0.0069811
ENSG00000204178	0.0101298	0.0128162	0.000860542	0.00402153	0.00553025	0.00894423	0.00382783	0.00699491	0.00463832	0.0061047	0.00223677	0.00395313	0.00151337	0.00055194	0.00236	0.00397528	0.00787119	0.0114861	0.00569063	0.00275179	0.00433395	0.00116214	0.00437192	0.00288588	0.00318738	0.00572908	0.00822631	0.0271797	0.00952251	0.00611845	0.00583765	0.00443649	0.00612789	0.00964795	0.002488	0.00922619	0.0122192	0.00543124	0.00453764	0.00111661	0.00680866	0.00404019	0.00263553	0.00612037	0.0111506	0.00533691	0.00114655	0.00403226	0.00859936
ENSG00000157978	0.0123479	0.0124569	0.0059674	0.0582388	0.0131942	0.0609813	0.0681057	0.0142383	0.00921126	0.0236709	0.031068	0.00807006	0.00507764	0.0276952	0.0100982	0.0175526	0.0132095	0.0137226	0.0159532	0.0845044	0.0735602	0.05207	0.057802	0.0159525	0.0106952	0.00267378	0.0142865	0.00573797	0.0298748	0.0151976	0.00847469	0.0286868	0.0222203	0.0304439	0.00836521	0.0109656	0.0622996	0.0142625	0.0620916	0.0678584	0.0351988	0.0082047	0.018463	0.0342411	0.0276395	0.00791472	0.0113204	0.00897194	0.0187791
ENSG00000117643	0.0079752	0.00879709	0.00739565	0.00853787	0.00705724	0.0015063	0.00174382	0.0262115	0.00901852	0.0132025	NA	0.0267212	0.00550454	0.00589728	0.00795946	0.00729547	0.00981334	0.00898441	0.0182168	0.0131507	0.003066	0.0102245	0.00880768	0.0171054	0.00840392	0.0232555	0.00878651	0.0465773	0.00753463	0.00802162	0.00975482	0.00716224	0.0088807	0.0385607	0.0100231	0.0119128	0.00781109	0.00684426	0.00443455	0.0148475	0.00626827	0.0156954	0.0170185	0.0122626	0.00114749	0.00523512	0.0117477	0.00814511	0.00829478
ENSG00000162430	0.0121367	0.00929897	0.0117285	0.0132833	0.0162154	0.015443	0.0116099	0.0108142	0.00942291	0.011941	0.0657226	0.00705716	0.00916546	0.0096955	0.0136573	0.00805777	0.0106528	0.0115865	0.00955874	0.0129647	0.0117293	0.0124613	0.00989025	0.0123792	0.00998415	0.0091207	0.014353	0.0117891	0.0126944	0.0129652	0.00884113	0.0139114	0.0105048	0.00954626	0.0145087	0.0103091	0.0091285	0.0132529	0.0146622	0.0160599	0.0127668	0.00881272	0.0117684	0.00870291	0.00829925	0.0165612	0.0110209	0.0105311	0.00672491
ENSG00000228172	0.00668334	0.0137806	0.000673077	0.0148682	0.00184036	0.0144529	0.00377824	0.0059685	0.00338532	0.00925064	0.00769527	0.0206955	0.0107319	0.000852182	0.0653172	0.00774836	0.00927079	0.0180936	0.00865853	2.54197e-05	2.54197e-05	0.0042417	0.00529279	0.00376577	0.00126664	0.00804294	0.00317529	0.00449647	0.00740301	0.00894486	0.00973987	0.00479372	0.00823463	0.0292142	0.0580805	0.0112798	2.54197e-05	0.00198473	0.00814514	0.00816665	0.0207433	0.00800359	0.0112595	0.010886	0.00878389	0.010177	0.00401896	0.00726127	0.0155848
ENSG00000117640	0.00834666	0.0195208	0.0211017	0.00411304	0.00260081	0.00570298	0.00747589	0.00650235	0.00566115	0.016743	0.00485488	0.00486711	0.00346745	0.00908203	0.02071	0.00367299	0.00873904	0.00979018	0.0097751	0.00334871	0.00335493	0.00584877	0.00610869	0.0186014	0.00984099	0.0114983	0.0285311	0.00650987	0.00648344	0.00814945	0.0062012	0.00784197	0.00665129	0.0143717	0.0342289	0.0132315	0.0113338	0.00239986	0.00665677	0.00529728	0.0114531	0.00484168	0.016238	0.00519366	0.0072798	0.00394463	0.0122676	0.00719683	0.00634285
ENSG00000182749	0.00899569	0.00783583	0.00329526	0.00840224	0.00193063	0.00569021	0.00469175	0.0052478	0.00746793	0.0101764	0.00851978	0.0109186	0.00550107	0.00221293	0.00200732	0.00438683	0.00521145	0.00309803	0.00516369	0.0083351	0.00361838	0.00925495	0.00697684	0.00485782	0.00579232	2.54197e-05	0.00943085	0.0076656	0.00361353	0.0040109	0.00715518	0.00418635	0.0051114	0.00804166	0.00680607	0.00924588	0.00376235	0.00696371	0.00375135	0.00810877	0.00604801	0.00581983	0.00343637	0.00842139	0.00639759	0.00383391	0.00375858	0.00411758	0.0129855
ENSG00000117632	2.54197e-05	0.10084	NA	2.54197e-05	0.00594059	0.00436351	0.0501047	0.0155874	0.00149828	NA	0.00019213	2.54197e-05	0.0129257	0.0114834	0.000723654	NA	0.00224926	NA	0.0134858	0.00364518	0.00882569	0.00182415	0.0122901	0.00752372	0.00750518	0.00341156	NA	NA	0.01267	0.0255288	0.020383	NA	0.0451089	0.0520079	NA	0.037201	0.0167906	0.0115901	0.0134574	2.54197e-05	0.00490508	0.00300581	NA	0.0336832	0.000856128	0.0293365	NA	0.00559398	2.54197e-05
ENSG00000158006	0.0202254	0.0244183	0.0423636	0.0173494	0.00662583	0.0177719	0.00791559	0.0261797	0.00818341	0.0051444	0.0111984	0.0206275	0.00627917	0.00321541	0.00522609	0.00966397	0.00613631	0.0187953	0.00573169	0.00813272	0.0111926	0.0166371	0.0177213	0.00723205	0.0141924	0.00188502	0.0214775	0.0040662	0.0133809	0.0122623	0.00986308	0.00827537	0.00784586	0.022346	0.00801632	0.0235305	0.0185251	0.0112416	0.0133967	0.00630429	0.0310726	0.00873156	0.0165027	0.0142182	0.00523483	0.00690084	0.00255696	0.00755673	0.00790342
ENSG00000158008	0.0383397	NA	NA	0.00303778	0.0807693	0.0031533	0.0261705	0.0284521	0.101101	0.057631	NA	0.139743	0.0235459	NA	0.0255241	NA	NA	NA	0.0587248	0.0136762	0.000845477	0.00632185	0.0306641	NA	NA	NA	0.0411262	NA	0.00584941	NA	0.0262914	0.0301213	0.0455028	NA	0.0328241	NA	0.000558985	0.0726093	0.00226551	0.0110702	0.0128993	NA	NA	NA	0.0206815	0.0358422	NA	NA	0.0278233
ENSG00000158022	0.121148	NA	NA	NA	NA	NA	NA	NA	0.142056	0.00899982	NA	NA	0.0413955	NA	NA	NA	NA	2.54197e-05	0.147774	NA	NA	NA	NA	NA	0.0676353	NA	0.00560277	NA	NA	0.123936	0.0283739	NA	NA	0.122305	NA	NA	NA	NA	NA	NA	NA	NA	0.0647862	NA	NA	NA	0.00629162	NA	0.206531
ENSG00000175087	0.0129155	0.0183704	NA	0.0437193	0.0120971	0.000609458	0.0690899	0.00438574	0.0105873	0.0013994	0.00329343	0.000811888	0.0240279	0.00779934	0.00518134	0.0281918	0.00824724	0.0697786	0.0129932	0.0221731	0.0324709	0.00869406	0.0225879	0.00153564	0.00983271	0.00968184	0.0161759	0.0217398	0.030943	0.0267393	0.0461373	0.0037163	0.00984412	NA	0.0129115	0.0310662	0.0190905	0.00187713	0.0263807	0.0099205	0.0287356	0.0178838	NA	0.0150908	0.00870502	0.030176	0.017213	0.0146823	0.00815116
ENSG00000197245	0.0647215	0.0650553	0.0448551	NA	NA	0.0865782	0.0952242	0.0668825	0.0539581	0.0832465	NA	0.0573166	0.0773305	0.0777911	0.0553439	0.0523719	0.109574	0.0676602	0.0831933	0.0657167	0.0787091	0.0909305	0.11078	0.0787909	0.0633758	NA	0.0728759	NA	0.0784736	0.0806882	0.0726177	0.31556	0.0659466	NA	0.0558815	0.109874	0.093684	NA	NA	0.0924694	0.0648068	0.0570619	0.0436787	0.152537	0.126563	0.0949412	0.0571662	0.0526365	0.0419341
ENSG00000236782	0.0260134	0.0154373	0.0212487	0.0363234	0.00307477	0.0469925	0.0451894	0.01604	0.020771	0.0322284	0.0114864	0.0228525	0.0188387	0.023225	0.0158079	0.0121184	0.0244734	0.024817	0.0225573	0.023024	0.0321789	0.0322315	0.0397491	0.0234146	0.0174163	0.0131911	0.0388416	0.0287952	0.0173737	0.020839	0.0185592	0.0264517	0.0238261	0.0395903	0.0201353	0.0172458	0.0297911	0.00406065	0.0300082	0.0363818	0.0325967	0.0188989	0.0384768	0.0274197	0.00829214	0.0314358	0.014974	0.0134597	0.0104058
ENSG00000142684	0.0543946	NA	NA	NA	NA	NA	NA	NA	0.0329774	NA	0.0370011	0.0581208	0.0426738	NA	0.0303092	NA	0.0550839	NA	0.0467443	NA	NA	0.0886717	NA	0.0815624	NA	0.0393479	0.0971372	0.0769795	0.0242704	0.0391633	0.032332	0.0471301	0.0476469	NA	0.0412234	NA	NA	NA	NA	NA	NA	0.0514462	NA	0.0395694	0.0171318	NA	NA	0.0335338	NA
ENSG00000130695	0.0211479	0.0366179	0.0450651	0.0335079	0.00904698	0.00622005	0.00413855	0.0134815	0.0187193	0.0137778	0.00281971	0.0135106	0.00960999	0.0203175	0.00168632	0.00869959	0.0230258	0.0146502	0.0146056	0.0113262	0.00746434	0.00755636	0.0131855	0.0108792	0.026472	0.00617295	0.0189259	0.0213084	0.00916259	0.0286151	0.0156007	0.00375806	0.0247837	0.0309952	0.0146322	0.0425025	0.00973584	0.00358675	0.005995	0.00752859	0.0200341	0.00944432	0.00535121	0.0166615	0.0433522	0.0124678	0.0156114	0.010045	0.0137182
ENSG00000142669	0.00879231	0.0124662	NA	0.00331918	0.00188475	0.0018134	0.00324988	0.00348117	0.00572722	0.0177375	0.00287471	0.00341317	0.0102043	0.00490918	0.00747265	0.00433631	0.00401952	0.005386	0.00439206	0.00266214	0.00109493	0.000790151	0.00104744	0.00971534	0.006879	0.00699932	0.01487	0.00191066	0.0052116	0.00340236	0.0115472	0.00228074	0.00459909	0.0145402	0.00188385	0.00825372	0.00216216	0.000870598	0.00164832	0.00344152	0.000744605	0.00674486	0.00159866	0.00302849	0.00375386	0.00291947	0.00556734	0.00954234	0.00400771
ENSG00000158062	0.00716415	0.0108432	0.0164917	0.00444571	0.011528	0.00904699	0.00189357	0.0100787	0.0108341	0.0101931	0.0175826	0.005732	0.00768838	0.0095337	0.00823051	0.00858676	0.00631263	0.00475312	0.00621726	0.00385063	0.00510933	0.00392024	0.00681986	0.00857204	0.00979124	0.00558738	0.00735149	0.00312413	0.0102061	0.0082215	0.0105893	0.00977986	0.00762942	0.0144078	0.00690389	0.0250889	0.00136167	0.0103128	0.00525118	0.00231253	0.00686176	0.0127697	0.0070597	0.00950115	0.00868164	0.00372506	0.0047914	0.00448404	0.0117225
ENSG00000169442	0.0550578	0.061541	NA	NA	NA	NA	0.0133435	0.0633326	0.0588674	0.0795436	0.00249665	0.172447	0.0321572	0.0106946	NA	0.0587273	0.100902	0.0585181	0.0748465	0.0236316	NA	NA	NA	0.0104677	0.0641381	NA	0.531158	0.144869	0.111705	0.043014	0.0358553	0.0105027	0.0175251	0.109125	0.0531947	0.064877	0.185142	NA	NA	NA	0.0016312	0.020984	0.106001	0.0672714	0.19881	0.038777	0.0534274	0.0460391	0.165947
ENSG00000176092	0.0993052	NA	NA	NA	NA	NA	NA	0.0164719	0.0209363	NA	NA	NA	0.0102895	0.028066	0.00646482	0.00372227	NA	NA	NA	NA	NA	NA	NA	0.0410402	NA	NA	NA	NA	NA	0.0371072	0.0120441	NA	NA	NA	NA	NA	NA	NA	NA	NA	NA	0.00627373	NA	0.102565	NA	NA	0.00629127	NA	NA
ENSG00000117682	0.00544511	0.00425825	0.0135344	0.00736592	0.010697	0.00340813	0.00300473	0.00394126	0.00570777	0.00393129	0.0043785	0.00490336	0.0139287	0.00775164	0.00299972	0.00267199	0.0029871	0.0046545	0.00501836	0.00295927	0.00460561	0.00537146	0.00551091	0.00576641	0.00526443	0.00503558	0.00757137	0.00709191	0.00585195	0.00319493	0.0154624	0.00565636	0.00428841	0.0153319	0.00312359	0.00568079	0.00505901	0.0136756	0.00387465	0.00886826	0.00411559	0.00537359	0.00560003	0.0055691	0.00187524	0.00271595	0.00468515	0.00572044	0.00411286
ENSG00000198830	0.153493	0.212314	0.236762	0.261619	0.224915	0.32786	0.359291	0.178878	0.212846	0.205023	0.154541	0.24813	0.152977	0.124593	0.177575	0.125313	0.198769	0.192541	0.161391	0.317868	0.311417	0.274083	0.328402	0.162903	0.148965	0.228284	0.278438	0.235136	0.157733	0.131026	0.19521	0.175112	0.138192	0.222443	0.146126	0.185929	0.37852	0.19829	0.277775	0.241167	0.284772	0.193134	0.199594	0.189176	0.132128	0.204409	0.186989	0.17969	0.182289
ENSG00000117676	0.00363239	0.00604409	0.00499883	2.54197e-05	0.00219485	0.00710452	0.0023556	0.00210952	0.00361171	0.00813095	0.0016161	0.00349182	0.00206798	0.000660283	0.00115031	0.00105679	0.00348119	0.0020464	0.00242257	0.00151559	0.00205309	0.0017827	0.00442135	0.000649274	0.00649646	0.00485393	0.00753439	0.0409136	0.00417152	0.00151472	0.00132757	0.000443107	0.00167247	0.000776294	0.00102719	0.00950176	0.00357566	0.00340446	0.00188702	0.00313435	0.00295905	0.0016645	0.00166736	0.00144123	2.54197e-05	0.00225332	0.000707912	0.000780442	0.00620263
ENSG00000117713	0.00479419	0.00461964	NA	0.00647236	0.0014677	0.00383751	0.00117758	0.00182479	0.00148314	0.00312336	0.00206195	0.00136301	0.00213238	0.00196904	0.00239505	0.00418691	0.00414455	0.00700746	0.00304225	0.00647236	0.00355514	0.00179089	0.00281592	0.00301989	0.00352931	0.00681492	0.00336652	0.00582126	0.00307706	0.00287006	0.003038	0.00601713	0.00337677	0.016514	0.00519995	0.00146627	0.00225581	0.00146564	0.00232361	2.54197e-05	0.00624354	0.00132593	2.54197e-05	0.00316916	0.00433351	0.00489173	0.00359655	0.00191674	0.00325337
ENSG00000060642	0.0240378	0.0357581	NA	0.062847	0.00339232	0.0266487	0.00189646	0.041872	0.0342134	NA	0.0204212	0.0192364	0.0251628	0.0213517	0.00265505	0.00496503	0.0169066	0.0526206	0.0276197	0.00905806	0.012914	0.0471821	0.0141304	0.0144443	0.0245664	0.0098088	NA	0.0105042	0.0322191	0.00991746	0.013484	0.0171221	0.0124664	0.149711	2.54197e-05	0.0176976	0.0197849	0.0330811	0.00727678	0.0218532	0.0300321	0.0201215	NA	0.018492	0.0256754	0.0314375	0.0238525	0.0310821	0.0268673
ENSG00000204160	0.00316122	0.00222665	2.54197e-05	0.00864109	0.00368187	0.00314695	0.00246042	0.00111606	0.00266168	0.00580117	0.00413349	0.0111139	0.00313481	0.00390871	0.00707705	0.00371044	0.00178545	0.00392303	0.00275045	0.000285558	0.00490165	0.004502	0.0100736	0.00335498	0.00173983	0.00289174	0.00375042	0.00284908	0.00497972	0.00612425	0.00591185	0.00379836	0.0179066	0.004908	0.00351744	0.00416145	0.00383246	0.00359785	0.00987336	2.54197e-05	0.0130993	0.00376332	0.00705205	0.00342647	0.00108807	0.00357533	0.00206114	0.00326681	0.00310904
ENSG00000142751	0.00793701	0.00457753	0.00297052	0.0143591	0.00212535	0.0239837	0.00875319	0.003673	0.00486438	0.00596699	0.00113026	0.00828644	0.00497805	0.00163275	0.00293866	0.0100484	0.0056372	0.00226985	0.0096116	0.00319844	0.00949827	0.0144927	0.0339173	0.00590216	0.00186734	0.00278989	0.00729807	0.00486716	0.0075462	0.00959602	0.00717466	0.00176741	0.00634307	0.0168465	0.00251306	0.00445906	0.00672697	0.00254282	0.00899515	0.00439879	0.0176458	0.00745867	0.00151649	0.00522526	2.54197e-05	0.00264945	0.00248329	0.00232871	0.00598354
ENSG00000198746	0.0935614	NA	NA	NA	NA	NA	NA	NA	2.54197e-05	NA	NA	NA	0.0161641	2.54197e-05	2.54197e-05	NA	NA	NA	0.0243803	NA	NA	NA	NA	0.00696892	NA	2.54197e-05	NA	NA	2.54197e-05	NA	0.00921345	0.00931133	0.0300107	0.154645	0.0186205	0.0626466	NA	NA	NA	NA	NA	NA	NA	0.0737899	NA	NA	NA	NA	NA
ENSG00000090273	0.00502586	0.00233458	0.00688741	0.00459247	0.000956643	0.00716652	0.00777904	0.00507226	0.00506009	0.00528357	0.00141269	0.0102587	0.0048547	0.0121628	0.00147528	0.000524074	0.00314249	0.0043616	0.00379917	0.00322223	0.00484352	0.00271406	0.00286035	0.00372809	0.00400471	0.00303808	0.00682234	0.0115456	0.00651549	0.00534817	0.00486238	0.0125321	0.00646585	0.00910892	0.00336478	0.00455896	0.00608361	0.00227767	0.00225478	0.00666114	0.00508747	0.00720347	0.00108238	0.00495573	0.00598598	0.00322009	0.0091992	0.0087691	0.00360718
ENSG00000253368	0.0156306	0.00818402	NA	2.54197e-05	0.00815237	2.54197e-05	NA	0.0148384	0.00643684	0.0102717	NA	0.0426949	0.01932	NA	NA	0.00952091	0.0256977	0.030506	0.0404258	2.54197e-05	0.00534265	0.00245023	0.0239034	0.0392962	0.011621	0.0126903	0.000557006	NA	0.045397	0.000336339	0.0179318	2.54197e-05	0.0141999	NA	NA	0.0126507	0.0261319	0.00422078	0.00518435	0.0123821	NA	0.0263747	NA	0.0144999	NA	0.00303975	NA	0.0144626	2.54197e-05
ENSG00000158246	0.0147935	0.0103141	NA	NA	NA	NA	NA	0.00969325	0.00782778	0.0178411	NA	NA	0.00986529	0.00753241	0.000413592	0.011277	0.0194836	0.00522919	0.00908735	NA	NA	NA	NA	0.00835178	0.00996655	0.0089565	0.0121636	NA	0.028129	0.0153449	0.0086934	NA	0.0156729	NA	NA	0.0132097	NA	NA	NA	NA	NA	0.0095779	NA	0.0165026	0.00420786	0.0936555	0.0148669	0.0111222	5.3299e-05
ENSG00000090020	0.00675913	0.00766586	0.00359213	0.000364447	0.00157015	0.0117393	0.00396155	0.00326894	0.00537004	0.0139699	2.54197e-05	0.0100933	0.00962078	0.00754656	0.00785569	0.00286539	0.00942815	0.00733869	0.00344914	0.00296805	0.00102317	0.00950512	2.54197e-05	0.00738773	0.00798751	0.00103234	0.0234505	0.00500636	0.00319762	0.00801667	0.0086101	0.00638511	0.00791004	0.0071404	0.00464832	0.00210397	0.00795547	0.00360164	0.00268623	0.00254191	0.00572142	0.00353161	0.00249761	0.00628263	2.54197e-05	0.00303989	0.0110531	0.00395349	0.00730343
ENSG00000142784	0.00375619	0.0045346	NA	0.0114322	0.000981127	0.00202576	0.00270193	0.00624942	0.00591883	0.00335353	0.0141923	0.00168521	0.00489034	0.00234476	0.0026733	0.0028514	0.00196235	0.00746683	0.00677491	0.00350117	0.00194802	0.000788761	0.00691824	0.00298454	0.00502999	0.00918848	0.000960726	0.0111929	0.00907849	0.0102061	0.00935904	0.00803605	0.00395064	0.00583451	0.00240168	0.00539574	0.000941505	0.00627712	0.00215934	0.00693821	0.00247006	0.00518574	0.00464706	0.0094486	2.54197e-05	0.00632386	0.00488966	0.00737537	0.0100757
ENSG00000186501	0.00349815	0.00345413	0.000862748	0.00187043	0.00112004	0.00228042	0.00173	0.00313823	0.00274968	0.00377614	0.000601322	0.00660001	0.00313478	0.00319888	0.00282435	0.00331536	0.00349478	0.003466	0.00376871	0.00314072	0.00185125	0.00312944	0.00227137	0.00373319	0.00274866	0.00334041	0.00504041	0.00278417	0.00267585	0.00268019	0.00344936	0.00190034	0.002261	0.00370222	0.00232121	0.00303914	0.00284829	0.000510624	0.00395302	0.00285261	0.00211951	0.00415823	0.00220823	0.00426354	0.00125638	0.00177564	0.0033004	0.0039269	0.00192596
ENSG00000142765	0.0178174	0.0083602	2.54197e-05	0.021925	0.0634214	0.0337702	NA	0.0143684	0.0181808	0.0157725	0.0467232	0.00233101	0.00515351	0.00400281	0.00334658	0.00710109	0.00896525	0.00516141	0.00338956	NA	0.0278126	0.00893364	NA	0.00638483	0.0133706	NA	0.0366639	0.0101932	0.018839	0.00720512	0.00585758	0.00330054	0.0174228	0.00574049	NA	0.0391076	0.0230599	0.0535089	NA	NA	0.0290942	0.00638235	0.00964404	0.00677053	2.54197e-05	0.0103151	0.00555524	0.00163355	0.0135551
ENSG00000142733	0.00983261	0.00567222	0.0230598	0.0235776	0.0194223	0.0471951	0.00807877	0.0204322	0.0108454	0.00469138	NA	0.0114927	0.0137496	0.0241129	0.00461421	0.00341142	0.0103904	0.00865802	0.0080297	0.0130649	0.0173686	0.0143232	0.0242301	0.0128606	0.0154857	0.0178498	0.00920465	0.0172788	0.007738	0.00878855	0.0151268	0.00715095	0.00733278	0.0552471	0.0118652	0.00743095	0.0374565	0.0116429	0.0103429	0.00931803	0.0370474	0.0134504	0.00380061	0.00653627	0.00313293	0.00718721	0.0047086	0.00661834	0.00442231
ENSG00000142748	0.0484104	NA	NA	NA	NA	NA	NA	NA	0.0657137	0.0446182	NA	NA	NA	NA	NA	NA	0.0470705	NA	0.0354023	NA	NA	NA	NA	NA	NA	NA	0.021187	2.54197e-05	NA	NA	NA	NA	0.00449627	NA	0.0360568	NA	NA	NA	NA	NA	NA	NA	0.0367514	0.0109712	NA	2.54197e-05	NA	NA	NA
ENSG00000158195	0.00849066	0.00633664	0.000746	0.0107609	0.0142783	0.0119942	0.00480931	0.00815632	0.00641358	0.0086844	0.00682862	0.0072807	0.00636819	0.00793361	0.00729522	0.010929	0.00694108	0.00844935	0.00854672	0.00805425	0.00666136	0.00755217	0.0112813	0.00710212	0.00698732	0.00377889	0.00596556	0.0186664	0.00895067	0.0100872	0.00788263	0.00601828	0.00958269	0.00995284	0.00512724	0.00612709	0.00460608	0.00658309	0.0127088	0.00709746	0.00779776	0.00732695	0.00600057	0.00775462	0.00715738	0.0106611	0.00517277	0.00541811	0.00602564
ENSG00000126705	0.00679486	0.0132531	0.00188183	0.0228449	0.00732438	0.0225833	0.00813624	0.00980402	0.00787214	0.003809	0.0249929	0.00540829	0.00701484	0.00516576	0.012363	0.0117437	0.0184109	0.0113607	0.0122958	0.00722374	0.00920606	0.0129277	0.00382574	0.00561698	0.00516603	0.00422923	0.0074917	0.0194605	0.00877779	0.00691114	0.00845873	0.00885783	0.0065941	0.0519955	0.00648094	0.00381608	0.00954573	0.00485125	0.0103721	0.00874263	0.0200392	0.00640259	0.0108485	0.0138881	0.00728346	0.0113924	0.00655954	0.0161105	0.00930406
ENSG00000000938	0.0269253	0.0350674	NA	NA	NA	NA	NA	0.0664224	0.0377896	0.0463763	0.0903563	NA	0.0491553	0.0296334	NA	NA	0.0264599	0.0210845	0.0120355	NA	NA	NA	NA	0.0564049	NA	NA	NA	NA	0.0401101	0.0509759	0.0412877	0.0142497	0.0337687	0.0120763	NA	0.0371867	NA	NA	NA	NA	0.0135126	0.0208379	NA	0.00858036	NA	NA	NA	0.0222234	0.0244071
ENSG00000126709	0.00571559	0.00564682	NA	0.000865692	2.54197e-05	0.00423196	0.00152851	0.00765932	0.0144714	0.0033375	0.00160164	2.54197e-05	0.00699193	0.00496912	0.00709829	NA	0.00401451	0.00766972	0.00927026	0.00278028	0.00408685	0.00197507	0.0077999	0.00362887	0.00578735	0.00853022	0.00495774	0.00109101	0.00254037	0.00921485	0.00261263	0.0312233	0.00422486	0.0107088	0.0195315	0.00404149	0.00323442	2.54197e-05	0.00598819	0.00298856	0.013255	0.0272837	0.0179617	0.00880378	0.0141874	0.00232336	0.00128794	2.54197e-05	NA
ENSG00000009780	0.0123077	0.00881774	NA	0.00135897	0.025518	0.000779101	0.00710662	0.00945467	0.00362686	0.00352235	2.54197e-05	0.0166073	0.00934831	0.0078388	0.0118621	0.00565572	0.0238465	0.0075333	0.00816118	0.00392019	0.00340343	0.00978612	0.0480931	0.00509924	0.00854197	0.0070231	0.0129482	NA	0.0107304	0.0279955	0.0105189	0.00261205	0.0135882	0.0553484	0.00692473	0.0140603	NA	0.0285221	0.0274114	0.0152087	0.009851	0.0137465	NA	0.0393908	0.0222373	0.0169315	0.00686988	0.0201635	0.0106541
ENSG00000117758	0.00640331	0.0104422	NA	0.00363541	0.0010483	2.54197e-05	0.000352805	0.00791083	0.00528639	0.00861558	0.0112959	0.00500124	0.0184395	0.0105516	0.0102845	0.00579963	0.00660613	0.00418927	0.00552659	0.00435493	0.00314034	0.00178443	0.0110414	0.00415734	0.00386161	0.00550916	0.00715128	0.00890339	0.00845487	0.0114677	0.015466	0.0126238	0.0122907	0.015481	2.54197e-05	0.0103697	0.00114579	0.00690068	0.00235559	0.00376519	0.0065789	0.00772912	0.0066803	0.00996231	0.0186991	0.0042706	0.0170957	0.0132994	0.013745
ENSG00000117751	0.0134193	0.00619203	NA	NA	0.00385445	NA	2.54197e-05	0.00872366	2.54197e-05	0.000347433	0.00012116	0.0176024	0.00554257	0.0152493	0.00621087	0.00326036	0.0163439	0.00243253	0.0177928	0.00442938	0.00403456	0.0401318	NA	0.00320943	0.00345421	0.00104866	0.0140152	2.54197e-05	0.00459162	0.0283828	0.0176336	0.0196754	0.0104288	0.0242762	0.000172092	0.00740901	0.00642496	0.0173021	NA	0.0291859	0.0433294	0.00172697	NA	0.0118233	0.00262313	0.0106452	0.0031109	2.54197e-05	0.00649126
ENSG00000130775	0.011419	0.00923592	0.0156064	0.00733682	0.0303416	0.00474633	0.00692951	0.00987791	0.0128924	0.0121976	0.00967435	0.0218152	0.0107899	0.00826314	0.00270438	0.0111128	0.00949026	0.00929403	0.00998184	0.00348429	0.00645277	0.00798802	0.00489111	0.00989885	0.0127679	0.0157798	0.0151528	0.0154823	0.00700467	0.00864378	0.0169169	0.00643345	0.012219	0.00466052	0.00826632	0.0103472	0.0116826	0.0303488	0.0152839	0.00565569	0.00648186	0.00698639	0.00346939	0.00921831	0.00516777	0.00596391	0.00979176	0.0102621	0.00571165
ENSG00000117748	0.0177428	0.0202354	0.000948895	0.0282379	0.015696	0.0341022	0.0234918	0.0245162	0.0250269	0.0297069	0.00563342	0.0236306	0.0346046	0.00912354	0.0056341	0.0140718	0.0204336	0.0240189	0.0222692	0.0208625	0.041562	0.0253451	0.0219003	0.0173491	0.0206258	0.0209584	0.0438798	0.0178318	0.0188863	0.0355848	0.0312358	0.0120697	0.0214473	0.0529994	0.0222498	0.0254634	0.0339234	0.0164895	0.0296501	0.0252285	0.0247548	0.0148145	0.00865419	0.0188994	0.0160121	0.0416963	0.0150834	0.0113084	0.0107442
ENSG00000158156	0.0392606	0.0107336	NA	0.00902106	0.0115303	0.0260697	0.0033553	0.00967815	0.0148887	0.0165739	0.0201534	0.0424916	0.0338543	0.00893183	0.000254503	0.000564481	0.0195362	0.04271	0.0362825	0.00133072	2.54197e-05	0.0292952	0.01596	0.0266654	0.0234874	0.0214603	0.0286232	0.00724578	0.0259944	0.0381878	0.113474	0.0169282	0.02301	0.0484543	0.0241757	0.0113178	0.0157074	0.0124863	0.0916025	0.016974	0.0931932	0.00291936	0.0062371	0.0364232	0.023793	0.0265669	0.00896067	0.0164444	0.0234832
ENSG00000158161	0.0174928	0.00719295	0.0109957	0.00585322	0.00692953	0.0171471	0.0069754	0.00706212	0.00905295	0.00678092	0.00449297	0.00954876	0.00688428	0.0097935	0.0038471	0.00237181	0.00684447	0.0145226	0.0102552	0.0071145	0.00682451	0.00940255	0.00534745	0.00565903	0.00836517	0.00267811	0.0100032	0.0205471	0.00952069	0.0135355	0.00703609	0.00547817	0.00797997	0.0356202	0.00124347	0.0138906	0.0130235	0.00811166	0.00612993	0.00808396	0.0262955	0.00393509	0.00340155	0.0125813	0.00121106	0.00564067	0.00718895	0.00503732	2.54197e-05
ENSG00000126698	0.0174053	0.0251667	NA	0.00138004	0.00871848	0.0252656	0.0051992	0.0086377	0.00641141	0.011809	0.00475266	0.0118511	0.00984163	2.54197e-05	0.0075989	0.00923574	0.00563088	0.00616978	0.0106011	0.00640904	0.00365404	0.00104189	0.00865439	0.00443162	0.0118036	0.00914325	0.0116126	0.00837776	0.0086208	0.0111745	0.00647711	0.00234404	0.00990249	0.0469601	0.0115392	0.0125213	0.0148456	0.00403466	0.00909247	0.000610411	2.54197e-05	0.0161948	0.0018568	0.00900469	0.00516411	0.00507485	0.00333533	0.00659852	0.0137634
ENSG00000130770	0.0235327	0.0299025	0.025781	0.0249141	0.0510331	0.0304357	0.0248848	0.0308312	0.0275183	0.0288257	0.00489537	0.00417915	0.0102751	0.0160355	0.0117932	0.0260349	0.0170092	0.024201	0.0297281	0.0221254	0.0252027	0.0315084	0.0252845	0.0168663	0.0343623	0.0106927	0.0250846	0.00770917	0.0466665	0.0505958	0.0136152	0.0126299	0.0547162	0.0448491	0.0168308	0.0394899	0.0239452	0.0502286	0.023371	0.0289414	0.019781	0.00577741	0.010165	0.0236699	0.0510986	0.0802654	0.0278171	0.0220723	0.0423167
ENSG00000270605	0.400887	NA	NA	0.893867	0.893867	0.893867	0.893867	0.893867	0.893867	0.893867	0.103084	0.0448282	0.520975	0.206127	0.436273	0.825988	0.140384	0.295388	0.678628	0.893867	0.893867	0.893867	0.893867	0.353199	NA	0.315446	0.893867	0.244155	0.893867	0.893867	0.787021	0.0253638	0.893867	0.180431	0.151869	NA	0.893867	0.893867	NA	0.893867	0.893867	0.210448	0.25713	0.173923	0.893867	0.893867	0.432656	0.597559	0.893867
ENSG00000130766	0.0114318	0.012774	NA	0.016003	0.00997689	0.0095349	2.54197e-05	0.0189147	0.00561826	0.0204171	0.00207492	0.0132667	0.0102467	2.54197e-05	0.0148447	0.0113499	0.0158536	2.54197e-05	0.0105031	0.0177588	0.0179923	0.0076816	0.0180806	0.00141416	0.000493641	0.00183293	0.0173759	0.00755298	0.0052727	0.0133936	0.0113729	0.00606352	0.00770592	0.0659851	0.00663262	0.00844234	0.00698574	0.00194712	0.00446276	0.0174642	0.0394627	0.00525035	0.0016749	0.00746934	0.00206263	0.00654872	0.00276203	0.00291924	0.000825021
ENSG00000204138	0.0194701	0.0207099	0.0175811	0.0311531	0.0148236	0.0306077	0.015746	0.0255396	0.0203904	0.0194474	0.0172681	0.00785707	0.00541618	0.0135004	0.0029265	0.00676801	0.0184973	0.0235563	0.0126634	0.0160508	0.0264419	0.0195927	0.0224314	0.010627	0.0225522	0.0115719	0.0100313	0.00490123	0.0212203	0.00948055	0.00685963	0.0262069	0.0121133	0.0377613	0.00346657	0.0284201	0.0219264	0.0225457	0.0262036	0.0172861	0.0215535	0.00234168	0.00648353	0.00913229	0.0250546	0.0115639	0.00165898	0.0130703	0.0193772
ENSG00000180198	0.0143574	0.0136758	0.00914393	0.0197814	0.0101493	0.0100114	0.00847978	0.0051561	0.0101462	0.00613785	0.00502654	0.0207997	0.00829337	0.00479969	0.00114263	0.00879875	0.0128482	0.0113893	0.015075	0.00715987	0.00842055	0.0229256	0.0074279	0.00752357	0.0110968	0.00535078	0.0134174	0.00885071	0.0115001	0.00950218	0.0130914	0.00292272	0.00770181	0.00974573	0.00922911	0.00808246	0.0082969	0.0115769	0.00270552	0.00592849	0.0195771	0.00873589	0.0114868	0.0111213	0.00882282	0.0128298	0.00479387	0.00577811	0.00665331
ENSG00000180098	0.0278598	0.0410302	0.00559502	0.0328141	0.0163097	0.0380413	0.018873	0.0279579	0.0192114	0.0262536	0.0212193	0.0454742	0.0385568	0.028853	0.0137961	0.0131797	0.0264991	0.0255156	0.0249331	0.0356428	0.00229839	0.00718537	0.0153616	0.0358057	0.0219454	0.0191466	0.0183351	0.0756264	0.0306921	0.0173298	0.0349556	0.0211513	0.0227444	0.0412096	0.00654367	0.0323522	0.0213955	0.0168485	0.0149384	0.0211134	0.0139191	0.0236685	0.0385865	0.0540158	0.0137285	0.018899	0.0325327	0.0360303	0.0215566
ENSG00000197989	0.0166074	0.0150163	2.54197e-05	0.0456629	0.00501558	0.0470039	0.0239191	0.0078808	0.00813319	0.0205953	0.00762192	0.0059746	0.0117438	0.0155157	0.0222993	0.00762267	0.00985013	0.0199617	0.0273219	0.0245438	0.0253424	0.033353	0.0433235	0.00833421	0.0177131	0.00234905	0.0151218	0.0382637	0.0144724	0.0110711	0.0166256	0.0107858	0.0160252	0.0361537	0.0131577	0.0192665	0.04032	0.0114577	0.00292825	0.0449879	0.030911	0.00710165	0.00351182	0.0146984	0.018311	0.00727024	0.00358873	0.00752589	0.0219642
ENSG00000273544	0.0810203	0.0268745	NA	NA	0.0600227	NA	NA	0.0422133	0.0318615	NA	0.0338675	0.0609507	0.0314598	0.0485164	NA	0.0311164	0.0491618	0.0341573	0.068688	NA	NA	NA	NA	0.0393125	0.0766182	NA	0.0376492	NA	0.0964542	0.0574577	0.0345761	0.0856901	0.0539878	0.0844249	NA	0.0631251	NA	NA	NA	NA	0.0779295	0.00504168	0.0106978	0.0517959	0.0533086	0.0187769	0.0244418	0.0359054	0.0427582
ENSG00000120656	0.0357589	0.0450295	NA	NA	0.00490345	NA	NA	0.0224692	0.0149876	0.0523504	0.0086115	NA	0.0260065	0.0067877	2.54197e-05	NA	0.026581	0.0145392	0.0274217	NA	NA	NA	NA	2.54197e-05	0.0231353	0.00906666	0.0119719	NA	0.0380581	0.0198798	0.0212742	0.0188702	0.0220338	0.0259488	0.00951852	0.0227354	NA	0.00107788	NA	NA	0.017114	0.024576	NA	0.017867	NA	0.0103959	2.54197e-05	0.0373548	NA
ENSG00000188060	0.0386109	NA	NA	NA	NA	NA	NA	NA	NA	NA	0.0169802	NA	NA	NA	NA	NA	NA	NA	NA	NA	NA	NA	NA	NA	NA	0.00762039	NA	NA	NA	NA	NA	NA	NA	NA	NA	NA	NA	NA	NA	NA	NA	NA	NA	NA	NA	NA	NA	NA	NA
ENSG00000162419	0.0176622	NA	NA	NA	0.0113891	NA	NA	NA	NA	NA	0.0215999	NA	0.0248801	NA	0.00967481	NA	0.00653938	NA	0.0282897	NA	NA	NA	NA	NA	NA	0.0129227	NA	NA	0.0113065	NA	0.0434339	0.0198618	0.0323876	0.0363103	NA	0.0510894	NA	0.00566126	NA	NA	NA	0.0214714	NA	0.010868	0.0171781	0.0105898	NA	NA	0.0104395
ENSG00000198492	0.0109403	0.0154795	NA	NA	NA	NA	NA	0.0184288	0.0134523	0.0186226	0.0032879	0.0314748	0.0198531	0.015843	0.000184086	0.0426158	0.024699	0.0189622	0.0190793	NA	NA	NA	NA	0.00443098	0.0099167	0.00666555	0.0279698	0.0163065	0.0197511	0.0140199	0.017301	0.0288994	0.00696485	0.0740216	0.00519534	0.0424683	NA	NA	NA	NA	NA	0.00931063	NA	0.0235827	2.54197e-05	0.0147218	0.00158057	0.0162781	0.00879725
ENSG00000159023	0.00972882	0.00572007	0.00529609	0.0358255	0.0112834	0.028568	0.00528212	0.0084383	0.00411435	0.00905987	0.00393049	0.00576368	0.0022031	0.001676	0.00340451	0.00338881	0.00790375	0.00959275	0.00547462	0.00450607	0.00673854	0.00636983	0.00616244	0.00459423	0.00823474	0.027145	0.0107807	0.00408286	0.00885638	0.00482211	0.00268082	0.00242423	0.0049972	0.00381542	0.00523712	0.00754426	0.0124613	0.00958434	0.00962237	0.00741478	0.014056	0.00323528	0.00289145	0.00594918	0.00756491	0.00413581	0.0022764	0.00207353	0.00368274
ENSG00000253304	0.0075088	0.00569025	NA	NA	0.0153089	NA	0.00787492	0.00363155	0.00970581	0.00432971	NA	NA	0.0229727	0.0104777	0.00822113	0.00423952	0.00921247	0.00412177	0.0130911	0.0104411	0.00736042	NA	NA	0.00354325	0.0056373	0.005889	0.030595	0.0385266	0.00569729	0.00406441	0.0206736	0.00412491	0.00484203	NA	0.0296504	0.00476253	NA	0.00859073	0.0186252	0.0280584	NA	0.0188711	0.0144317	0.00777835	0.00497633	0.0205692	2.54197e-05	0.0146287	0.00342749
ENSG00000116350	0.00103018	0.00132617	0.000311371	0.00302162	0.0020353	0.0024246	0.00122375	0.000763211	0.00158163	0.000698868	0.000522869	0.00287964	0.00156511	0.000990062	0.00076095	0.00131747	0.00129613	0.00157805	0.00135845	0.000835372	0.0011185	0.000854948	0.00327545	0.000830527	0.0013799	0.000589734	0.00131601	0.00307653	0.00164065	0.00164963	0.00198466	0.00227481	0.00126646	0.00228817	0.000417235	0.00226626	0.001443	0.000445899	0.00149446	0.00176843	0.00178091	0.000995303	2.54197e-05	0.00160138	0.000418165	0.00180942	0.000794367	0.000859175	0.000964165
ENSG00000277916	0.0249068	NA	NA	NA	NA	NA	NA	0.0125025	NA	NA	0.00132739	NA	0.039127	NA	NA	NA	0.0384033	NA	0.0260198	NA	NA	NA	NA	0.0271408	NA	NA	NA	NA	0.0285527	NA	0.0438847	NA	0.0403916	NA	NA	0.0467478	NA	NA	NA	NA	NA	NA	NA	0.016616	NA	NA	NA	NA	NA
ENSG00000116353	0.00446189	0.00384203	0.0133166	0.00701362	0.0102546	0.00581392	0.0077528	0.00733247	0.00634829	0.00369316	0.00561753	0.00740635	0.00502185	0.0098386	0.00629766	0.00595695	0.0058511	0.0124644	0.00517935	0.00465349	0.000257791	0.00421347	0.00830381	0.00697585	0.00290048	0.00603955	0.00582156	0.00289648	0.0130661	0.0103488	0.0108353	0.0110097	0.00992002	0.0580406	0.0103786	0.0113041	0.000475173	0.0060693	0.00548378	0.00736634	0.00819197	0.00701477	0.00992287	0.010475	0.0052916	0.00875089	0.00514772	0.0141032	0.00491979
ENSG00000060656	0.00594066	0.00287788	0.00769224	0.00801824	0.0301823	0.00635853	0.00634985	0.0195389	0.00451626	0.0134349	NA	0.00581515	0.0073252	0.0188643	0.002698	0.00257046	0.0075676	0.00593156	0.00652035	0.0117142	0.00138423	0.00131462	0.00816886	0.017608	0.00914994	0.0146387	0.0113708	0.00320711	0.00264915	0.00276631	0.00518871	0.0104692	0.00703513	NA	0.0188201	0.00585432	0.0077425	0.0251879	0.0105131	0.0133797	0.0424633	0.0115722	0.0275483	0.0068998	0.00450051	0.0128695	0.000951693	0.00420691	0.00943558
ENSG00000186056	0.0301228	0.0314662	NA	0.0823115	NA	0.041708	0.0620466	0.0166108	0.0275255	NA	0.00551345	0.0223901	0.00615964	0.00730016	0.0206087	0.00462172	0.0274338	NA	0.0100128	NA	0.0754678	NA	0.0670499	0.0100051	0.0251473	NA	NA	NA	0.0239824	0.0233933	0.0189465	0.00446885	0.0206379	0.0320214	NA	0.045506	NA	NA	NA	NA	0.0551344	0.0365616	NA	0.0196265	0.0132506	0.0203157	0.0176995	0.0105433	0.00281995
ENSG00000162511	0.00544437	0.00298214	0.000406561	0.00826433	0.0107273	0.0176181	0.0039952	0.00390012	0.00300998	0.00215029	0.00784153	0.00182259	0.00474043	0.00196328	0.00634034	0.0034989	0.00354913	0.00300371	0.00705385	0.00117674	0.00767257	0.00259701	0.00170352	0.00358511	0.00520284	0.196801	0.00745721	0.00402134	0.00481018	0.00361671	0.00502112	0.00230409	0.00511195	0.00230251	0.00254446	0.00499188	0.00685389	0.0226854	0.00126066	0.00125322	0.00246955	0.00272884	0.00434411	0.00206883	0.0276715	0.00676098	0.00167861	0.0018098	0.0123144
ENSG00000162512	0.00642271	0.021982	0.0068054	0.00242657	0.00114705	0.00298296	0.00162384	0.00355385	0.00322321	0.00391001	0.141839	0.010942	0.00663149	0.00311252	0.00400953	0.00588499	0.00450017	0.0118622	0.00486598	0.00256952	0.00306019	0.00161093	0.00208512	0.00356574	0.00492339	0.00580882	0.00688769	0.00835419	0.00383545	0.00286012	0.00615637	0.00563856	0.006373	0.0420401	0.00462071	0.0373431	0.00208716	0.00340356	0.0019463	0.00223859	0.00116053	0.0064169	0.00596965	0.0060201	0.00615249	0.00597295	0.00699776	0.00479586	0.00727515
ENSG00000134644	0.0034841	0.00336421	2.54197e-05	0.00628693	0.00280675	0.00124102	2.54197e-05	0.00265866	0.00203483	0.00403119	0.00245844	0.00649718	0.00276412	0.00143386	0.00346202	0.00160802	0.00369059	0.00595919	0.00508196	0.00307776	0.00528549	0.00524741	2.54197e-05	0.00251493	0.00273802	0.00151042	0.00236333	0.00272181	0.00518324	0.00672395	0.00264144	0.0013879	0.00253294	0.0113757	0.00069785	0.00228903	0.00511396	0.00456955	0.000769789	0.00312804	0.00837983	0.00275074	0.00834532	0.00630841	0.00190297	0.00501017	0.00170428	0.00609696	0.00137411
ENSG00000060688	0.00636048	0.00470553	2.54197e-05	0.0129517	0.00524076	0.00995266	0.00565474	0.00637353	0.00270566	0.00344051	0.00114665	0.00631768	0.00893806	0.00408971	0.00132618	0.00548214	0.00459994	0.00726031	0.00621106	0.00245088	0.00587358	0.00905983	0.00878387	0.00148014	0.00427644	0.00228048	0.0044591	0.00712617	0.00759709	0.00600749	0.00855159	0.00306575	0.00624337	0.00945781	0.00485035	0.00728005	0.00319224	0.00631034	0.0053063	0.00965729	0.00742984	0.00219902	0.00999265	0.00684492	0.00217045	0.00422934	0.00743375	0.00441038	0.00110485
ENSG00000121766	0.00274823	0.00191852	2.54197e-05	0.00406653	0.00296139	0.00280446	0.00451499	0.00362311	0.00262242	0.00954857	0.00114797	0.00276607	0.00320334	0.000789524	0.000672188	0.0024544	0.00243355	0.00375937	0.00284544	0.00110336	0.00117784	0.00264418	0.00249355	0.00259241	0.0018799	0.00102934	0.00940478	0.0042238	0.00308545	0.00329104	0.00398766	0.00284373	0.00428854	0.00978304	0.00224434	0.00111483	0.00232712	0.00101503	0.00165144	0.00318631	0.00479134	0.00169878	0.00448668	0.00234117	0.00174633	0.00371938	0.0036343	0.00391288	0.000466651
ENSG00000121769	0.0165397	0.0197841	NA	0.0176219	0.00403651	0.0225872	0.00308242	0.044632	0.0335696	0.00829641	0.0418249	NA	0.0670955	0.122087	0.00972356	0.077505	0.0535277	0.0790973	0.0537861	0.00522372	0.00860316	0.0120553	0.0182325	0.0345782	0.0319724	0.0371019	0.00598865	NA	0.0301586	0.00105334	0.0956256	0.0170805	0.0491987	NA	0.0454889	0.017407	0.032963	0.0043287	0.00990168	0.0169905	0.00515461	NA	0.0220479	0.0464497	0.0145325	0.0451502	0.026814	0.00981537	0.0382343
ENSG00000168528	0.11988	0.154186	0.0254822	NA	NA	NA	NA	0.0200065	0.139522	0.0699064	0.0860051	0.0391188	0.0589157	0.00496582	0.0126028	0.0626375	0.110015	0.142341	0.0351791	NA	NA	NA	0.0738277	0.0203348	0.139372	0.322537	0.111978	0.0309979	0.141499	0.0255871	0.0532515	0.159062	0.0236594	0.367774	0.044012	0.200678	NA	NA	NA	NA	NA	0.0482044	0.0225516	0.031589	NA	0.0299926	0.0179248	0.00979205	0.135757
ENSG00000142910	0.00301414	0.00242327	0.00960822	0.0307502	NA	0.0611735	0.00819314	0.00339897	0.00190045	0.0024911	NA	0.00708277	0.00533059	0.00656773	0.0060328	0.00571523	0.00463158	0.00110507	0.00470223	0.00124827	0.0135277	0.0248447	0.00882794	0.00347051	0.00391253	NA	0.00249629	0.000332916	0.0061745	0.00199582	0.00970701	0.00392556	0.00525332	NA	0.011649	0.00277292	0.00593485	NA	NA	0.0166098	2.54197e-05	0.0111372	0.00420957	0.0051113	0.00409353	0.00869043	0.00446906	0.00384335	0.00357046
ENSG00000121764	0.00126899	0.00189708	0.000415402	0.000231215	0.000631066	0.00375769	2.54197e-05	0.000974181	0.00103478	0.000155519	2.54197e-05	0.00381657	0.000945095	0.000359252	0.00226491	0.00132804	0.0038127	0.00149105	0.0012868	0.00112632	0.00179803	0.00188784	0.00585161	0.00151619	0.000291842	0.000654062	0.0020936	0.000736848	0.00106142	0.00220762	0.00219897	0.000764281	0.000589261	0.00322782	0.00025316	0.00116728	0.00024072	0.00238216	0.00194973	0.000722497	0.0038978	0.00073145	0.00194351	0.00192693	0.001478	0.00233	0.00217334	0.00144294	0.00127735
ENSG00000162517	0.00147271	0.00159605	0.000273829	0.00015128	0.000885057	0.00308744	2.54197e-05	0.00101269	0.00119653	0.000386926	2.54197e-05	0.0044499	0.00113515	0.000619328	0.00255119	0.00148564	0.00398288	0.00186262	0.00182198	0.00133177	0.00178826	0.00201365	0.00580625	0.00153533	0.000465804	0.000928451	0.00238156	0.000827838	0.00155465	0.00292652	0.00194693	0.000911834	0.000648134	0.00352331	0.00024623	0.00104551	0.000209287	0.002434	0.00217534	0.000889279	0.00380703	0.00077141	0.00115835	0.00189729	0.00235565	0.00193111	0.00192602	0.00181834	0.000585377
ENSG00000235790	0.0166044	0.0203441	0.0138898	0.0152643	0.0621581	0.01734	0.0371765	0.0134779	0.0179118	0.0216683	NA	NA	0.0123304	0.0264681	0.00857682	0.0152987	0.022305	0.0246197	0.0219076	0.0243172	0.0242323	0.0393969	0.0341946	0.026257	0.0197251	0.0113527	0.0623039	NA	0.0113357	0.0208775	0.0140154	0.0299251	0.0147424	NA	0.0211124	0.023956	0.0349299	0.0572828	0.0367338	0.0344123	0.0233234	0.0338729	NA	0.0128377	0.0154869	0.0286897	2.54197e-05	0.0192354	0.0167979
ENSG00000084636	0.00575146	0.00558822	0.0016813	0.0160597	0.0500468	0.0197756	0.0224644	0.00388991	0.00378168	0.0036283	0.0942841	0.0197182	0.0046652	0.00552073	0.00568061	0.00240693	0.00476182	0.00577065	0.00412751	0.0188762	0.013187	0.0140598	0.0169459	0.00337326	0.00508311	0.00404185	0.00842508	0.0123564	0.00360796	0.00430219	0.00505553	0.0105779	0.00655967	NA	0.00515759	0.00538549	0.0144816	0.0547236	0.0186736	0.013732	0.0158902	0.00522269	0.00802579	0.00480764	0.0058138	0.00906019	0.00315077	0.00626339	0.00206035
ENSG00000121753	0.0271724	0.0223944	NA	0.00373448	0.0140904	0.00458037	0.00564701	0.0141468	0.0173727	0.00722037	NA	NA	0.0304418	0.0300425	0.00660992	0.0130489	0.0138966	0.0120036	0.0177886	0.00448479	0.00535484	0.00695503	0.00525078	0.0315053	0.0158282	NA	0.0147048	NA	0.015937	0.023055	0.0425048	0.0184681	0.0951024	NA	0.0210142	NA	0.00675352	0.0126259	0.00512553	0.00431553	0.00874589	NA	NA	0.0395695	0.00360956	0.00618962	NA	0.0249446	0.00683792
ENSG00000254545	0.0260541	0.027157	NA	NA	NA	NA	NA	NA	NA	NA	NA	NA	NA	NA	0.00201521	NA	0.0309971	NA	0.149076	NA	NA	0.0340362	NA	NA	NA	0.020505	NA	NA	0.0502796	NA	NA	NA	NA	0.0830335	NA	0.141931	NA	NA	NA	NA	NA	NA	NA	0.0177347	NA	0.16397	NA	NA	NA
ENSG00000134668	0.02316	0.0315669	NA	NA	NA	NA	NA	NA	NA	NA	NA	NA	NA	NA	0.00640455	NA	0.0451582	0.135186	0.133843	NA	NA	0.0259991	0.0686545	NA	NA	0.0381048	NA	NA	0.0915492	0.0849659	NA	0.043364	NA	0.121159	NA	0.215591	NA	NA	0.00394659	NA	NA	NA	NA	0.0151412	NA	0.111049	NA	NA	NA
ENSG00000269967	0.00255764	0.00464861	0.00550287	0.00282243	0.00208155	0.00222932	0.00101356	0.00105988	0.00256261	0.00178604	0.00197311	0.00701222	0.00800472	0.00490852	0.000303964	0.00132366	0.00311754	0.0015935	0.00354135	0.00240988	0.00188727	0.808918	0.00159775	0.00285081	0.00191878	0.00137326	0.00263546	0.00464704	0.00205083	0.00349446	0.0066579	0.000831637	0.00589383	0.00578396	0.00405134	0.00170627	0.00182869	0.00280028	0.00231339	0.00267857	0.00365517	0.00176788	0.00437874	0.00215414	0.00123353	0.00168095	0.00268107	0.00294291	0.00768063
ENSG00000184007	0.00241234	0.00480921	0.00610079	0.00196022	0.00196496	0.00203684	0.000723192	0.000783499	0.00269578	0.00194613	0.00238798	0.00648485	0.00783985	0.00473387	0.000787336	0.00287381	0.0032703	0.00177554	0.00359804	0.00222917	0.00223221	0.00311552	0.00137038	0.00332856	0.00234872	0.00140123	0.00302626	0.00471806	0.00238725	0.00323331	0.0081637	0.00133351	0.00559321	0.00610952	0.00393005	0.00170637	0.00141162	0.00158476	0.00207806	0.00102233	0.00308569	0.00202561	0.00436429	0.00297893	0.00116516	0.00227453	0.00329216	0.00306019	0.00564847
ENSG00000121774	0.0146244	0.024575	NA	NA	0.00207981	NA	NA	0.035777	0.00252258	0.00480377	0.00393054	0.022457	0.00811531	2.54197e-05	0.00334735	0.0306768	0.00838619	0.00885944	0.00943894	2.54197e-05	0.00168934	NA	NA	2.54197e-05	0.034056	2.54197e-05	0.00630451	0.0314319	0.0168441	0.0250523	0.0281624	0.00717106	0.00963803	0.032376	0.00235308	0.00531139	NA	2.54197e-05	2.54197e-05	2.54197e-05	0.0276411	0.00469447	NA	0.0125835	2.54197e-05	0.0109838	2.54197e-05	0.00525518	0.000624961
ENSG00000203325	0.0950265	NA	NA	NA	NA	NA	NA	NA	NA	NA	NA	NA	NA	NA	NA	NA	NA	NA	NA	NA	NA	NA	NA	NA	NA	NA	NA	NA	0.0734561	NA	NA	NA	NA	NA	NA	NA	NA	NA	NA	NA	NA	NA	NA	0.0440592	NA	NA	NA	NA	NA
ENSG00000121775	0.00766075	0.00653434	NA	0.00295243	0.00394054	0.00722397	2.54197e-05	0.0067197	0.00630778	0.00509766	0.0085474	0.0168073	0.00651058	0.00467247	0.00159269	0.00701781	0.00878018	0.0190855	0.00922588	0.0144169	0.00803412	0.0183731	0.00765973	0.00882379	0.0108035	0.00589486	0.00904083	2.54197e-05	0.0178775	0.00649786	0.0148877	0.00817596	0.00898717	0.0216681	0.00543031	0.00897715	0.00848686	0.00805069	0.00846013	0.0103038	0.014982	0.00414856	0.0146797	0.00897875	0.00123486	9.27856e-05	0.00466848	0.0069818	0.0058541
ENSG00000025800	0.0121926	0.00825287	2.54197e-05	0.0426939	0.00280544	0.017644	0.0318491	0.0056572	0.00616477	0.01005	0.00557539	0.0113812	0.00456176	2.54197e-05	0.00321978	0.00262967	0.0087285	0.00543801	0.0144238	0.0138502	0.0170296	0.0142354	0.0103164	0.00999978	0.00357332	0.0026835	0.00856358	0.0124333	0.0109191	0.00584016	0.0133732	0.00584493	0.0093375	0.0190372	0.00824409	0.00688725	0.0231539	0.00251924	0.00799758	0.010065	0.0172986	0.0042888	0.0241894	0.00855407	0.00557087	0.0104627	0.0069722	0.00549041	0.00200418
ENSG00000084652	0.00615273	0.00399257	NA	2.54197e-05	0.0103585	0.0131236	0.00183231	0.000332579	0.00433296	0.00620684	0.00412104	0.0156121	0.0061037	0.0146076	0.000588588	0.00229965	0.00431935	0.0109677	0.0054787	0.00436807	0.00293236	2.54197e-05	0.0199665	0.00475985	0.00549275	0.00445555	0.00223382	0.00081878	0.011098	0.00563374	0.0113559	0.0052046	0.00518569	0.0131179	0.00289817	0.00372603	0.00449321	0.00988533	0.00598582	0.00292691	0.00812277	0.00183414	0.00474214	0.00842182	0.00698065	0.0052474	0.00157876	0.00852693	0.011269
ENSG00000222046	0.0448499	0.0341874	NA	NA	NA	NA	NA	0.0855304	0.0425103	NA	NA	NA	NA	0.0284439	0.0109212	2.54197e-05	0.0144487	0.00275878	0.0651678	0.0268762	0.00712378	NA	NA	0.0102066	0.0169427	2.54197e-05	NA	NA	0.0196551	2.54197e-05	NA	0.00807548	0.0210701	0.0257166	0.0300391	0.0434256	NA	NA	NA	2.54197e-05	NA	0.0118683	NA	0.0131081	0.00788939	0.0246341	0.00996605	NA	0.000969849
ENSG00000160055	0.0458504	0.0287556	NA	NA	NA	0.0708162	0.033329	0.035309	0.0328762	0.0327736	0.0220186	0.0122998	0.019242	0.0178738	0.00376011	0.00364838	0.0140348	0.00511092	0.0324583	0.0208469	0.014885	2.54197e-05	NA	0.00767661	0.00573452	0.00501514	0.0207654	NA	0.0170976	0.01639	0.0522667	0.0012394	0.00889808	0.0266714	0.0194702	0.0239535	0.0274856	0.0151464	0.0459319	0.00700947	NA	0.00393123	0.00956801	0.0159098	0.0032931	0.0120928	0.0204541	0.00843717	0.00622308
ENSG00000084623	0.0139167	0.00939966	0.024448	0.0120321	0.0108772	0.0238901	0.00949298	0.00854763	0.0105809	0.0112243	0.0167689	0.00597053	0.0123603	0.0144604	0.012518	0.0117015	0.0132081	0.0113466	0.0116774	0.0191663	0.0106895	0.0166193	0.0210202	0.0144228	0.0104287	0.016127	0.0182435	0.013585	0.00993008	0.0102752	0.00887206	0.010536	0.0111994	0.0128132	0.0113276	0.0133919	0.0093261	0.0127935	0.0136625	0.0076791	0.0186999	0.0162046	0.00748952	0.00784414	0.00976765	0.00481712	0.00559376	0.00981996	0.00881888
ENSG00000220785	0.00852169	0.00827297	NA	0.014129	0.0505066	0.0298157	0.0155949	0.0116976	0.00914254	0.0074671	0.18755	0.00316068	0.0089378	0.0194819	0.00935052	0.00966665	0.020336	0.0105735	0.00897949	0.0212994	0.0261244	0.0205466	0.00573867	0.0165825	0.00844671	0.0216834	0.00975199	0.00185414	0.0191895	0.00814339	0.0170375	0.0200612	0.0111719	0.42091	0.00623002	0.0133959	0.015171	0.0448629	0.0262236	0.0205189	0.0359985	0.0122738	0.0206123	0.0179845	0.00458987	0.0107086	0.00773517	0.00860487	0.00496278
ENSG00000183615	0.0917771	0.0576662	NA	NA	NA	NA	NA	0.0577886	0.0941852	NA	NA	NA	NA	0.122946	NA	NA	0.10143	0.11769	0.076145	NA	NA	NA	NA	0.0449913	0.0226324	NA	0.12857	NA	0.0853806	0.0520235	NA	NA	0.0737949	NA	0.0814429	0.0673914	NA	NA	NA	NA	NA	0.0826971	NA	0.0730336	NA	0.026857	NA	0.068007	0.0639489
ENSG00000116478	0.0163983	0.019853	NA	NA	NA	0.0160095	NA	0.00378517	0.0156869	0.0215205	0.0096171	0.00344706	0.024204	0.00452444	0.00384549	0.0243343	0.00279459	0.0223679	0.00488948	0.0156245	NA	0.0443761	NA	0.00598124	0.0156456	0.00925422	0.0236128	0.0048459	0.0240908	0.0139585	0.0119615	0.011292	0.0121969	0.0260469	0.0151211	0.0197715	NA	NA	NA	NA	2.54197e-05	0.00587047	0.0379042	0.00907059	0.034149	0.0120425	0.0160535	0.00860707	0.0190848
ENSG00000175130	0.0159864	NA	NA	NA	NA	NA	NA	2.54197e-05	0.0156303	0.00362615	NA	NA	0.00487941	0.00836216	0.00654771	NA	0.00336781	NA	0.00557042	NA	NA	NA	NA	0.0138678	NA	NA	0.0283175	NA	0.00709226	0.0180539	0.00428675	0.0163383	0.00955531	0.00559903	NA	NA	NA	NA	NA	NA	NA	0.00913813	NA	0.0168109	NA	NA	NA	0.00414189	NA
ENSG00000162526	0.0180066	0.0163741	NA	NA	0.00245201	NA	NA	0.00676062	0.00824949	0.00763108	NA	0.00591495	0.000457654	0.00818689	0.00360855	0.000463034	0.020224	0.00548202	0.00502396	0.00105776	NA	NA	NA	0.0144363	0.0118824	2.54197e-05	2.54197e-05	0.0120402	0.0183208	0.0356803	0.0244142	0.00901631	0.00874146	0.0165286	0.0109354	0.020443	NA	0.00705142	NA	0.00318274	NA	0.0149831	2.54197e-05	0.00653664	0.00122081	0.0133512	0.00525404	0.0105105	0.00656576
ENSG00000160058	0.00237135	0.00515118	2.54197e-05	0.00387804	0.00153771	0.00367292	0.000402551	0.00237462	0.00253179	0.00253203	0.0034459	0.00168049	0.00169177	0.00366952	0.00135088	0.00339531	0.00252802	0.00149241	0.00215774	0.00116912	0.00196778	0.00310791	0.00426525	0.00195575	0.00302861	0.00329084	0.00332244	0.00095476	0.00185512	0.00169393	0.00406509	0.00247862	0.00251014	0.00320048	0.00136902	0.00364363	0.00136155	0.00218574	0.00063004	0.00228255	0.00453438	0.00270172	0.000426435	0.00240415	0.00322953	0.00153985	0.0013536	0.00169373	0.0039033
ENSG00000160062	0.0433478	0.0384789	NA	NA	0.0395049	NA	NA	0.07182	0.0264862	NA	NA	NA	0.0387965	NA	0.0158821	0.025466	0.0388493	0.028664	0.0404503	NA	NA	NA	NA	0.0241376	0.013601	0.013655	NA	NA	0.0450993	0.0544051	0.0738204	NA	0.0189147	NA	NA	0.0477607	NA	0.0636036	NA	NA	NA	NA	NA	0.0210603	0.0256158	0.0420909	NA	NA	0.0243785
ENSG00000176261	0.006081	0.0057272	NA	0.00532105	0.00784696	0.00313939	0.00196401	0.014572	0.00908625	0.00318312	0.0066929	0.0158597	0.011121	0.00745086	0.00485577	0.00667426	0.0139569	0.0125581	0.0105307	0.00935076	0.0102084	0.0108878	0.00997787	0.00573665	0.00871681	0.00580214	0.00636035	2.54197e-05	0.00772616	0.00889309	0.00903554	0.0124168	0.013186	0.0751425	0.00263961	0.00752913	0.0125836	0.00401532	0.00841686	0.0149045	0.0139383	0.00734727	0.00142228	0.01917	0.0144993	0.0174575	0.0162301	0.00886686	0.00299197
ENSG00000162521	0.00535019	0.00417222	2.54197e-05	0.00329452	0.0115484	0.00647524	0.00299486	0.00470776	0.00450172	0.00675213	0.00172046	0.00191993	0.00449457	0.00395381	0.00267	0.000809009	0.00380918	0.00393192	0.00359906	0.00187162	0.00149679	0.00294042	0.00289465	0.00301409	0.00394043	0.00356025	0.00361459	0.0037681	0.00349584	0.00295056	0.00277448	0.00330861	0.00250517	0.00948722	0.00307167	0.00428136	0.00327127	0.00305706	0.00230009	0.00304804	0.00418057	0.00254432	0.00482629	0.00367125	0.00180534	0.00187901	0.00443575	0.00393645	0.00151454
ENSG00000162520	0.101023	0.0138668	NA	NA	NA	NA	NA	0.013732	0.00824257	0.00374401	NA	NA	0.0825695	0.0115418	0.00386733	2.54197e-05	0.104883	0.0092531	0.106691	NA	NA	NA	NA	0.011671	0.0140256	0.0593806	0.0360462	NA	0.0355221	0.0139928	0.0322021	NA	0.0178616	NA	0.0542309	0.0117414	NA	NA	NA	0.00989277	NA	0.0351623	NA	0.0174059	NA	NA	0.0226875	0.0294075	0.0168028
ENSG00000162522	0.00771537	0.0133425	2.54197e-05	0.00603946	0.00809247	0.00772908	0.00583399	0.00736998	0.00276612	0.00496959	NA	0.00186497	0.00154155	0.00186714	0.0218786	0.00224724	0.00533757	0.0195632	0.00100589	0.0105751	0.00134501	0.00648577	0.0307405	0.00190631	0.00499682	0.0111503	0.00758044	0.0148121	0.0100791	0.000912382	0.00147685	NA	0.00213713	NA	0.00606957	0.0233244	0.00922006	0.0291618	0.00725711	2.54197e-05	0.0332053	0.0017206	0.00189132	0.00462952	0.00729306	0.00755734	0.00049197	0.00176376	0.00651697
ENSG00000134684	0.00596734	0.00796217	0.0122331	0.00552018	0.00275268	0.00749003	0.0024392	0.00623931	0.00596719	0.00511868	0.00257311	0.00642613	0.00405093	0.00758814	0.000710407	0.00131922	0.00805935	0.00736492	0.00745576	0.0036756	0.00257119	0.00141027	0.00706159	0.00477763	0.00509515	0.00654687	0.00745359	0.00687039	0.0024261	0.00616807	0.00596772	0.00369638	0.00279498	0.00780673	0.00457042	0.00576638	0.00142311	2.54197e-05	0.00152094	0.00347284	0.0015418	0.00497277	0.00550519	0.00285211	0.00999805	0.00808218	0.00372879	0.00492437	0.00334467
ENSG00000116497	0.00984982	0.00436817	2.54197e-05	0.0110987	0.00315856	0.00586955	0.00132904	0.00248754	0.00506741	0.00276508	0.00280218	0.00902027	0.00876153	0.00193978	0.00209932	0.0066643	0.00491472	0.00492438	0.00715682	0.00378803	0.00472901	0.00688106	0.00696597	0.00327682	0.00260431	0.00427829	0.010786	0.00650826	0.0080847	0.0115223	0.00375932	0.00155959	0.00404248	0.051552	0.000823158	0.00761811	0.00372802	0.00212011	0.0101795	0.0048403	0.0037464	0.00385111	0.00397349	0.00471289	0.0030098	0.00237621	0.00211712	0.00146205	0.000609421
ENSG00000160097	0.179346	0.0193524	NA	0.0091404	0.00205355	0.00445528	0.00190289	0.0475399	0.0167834	0.00663172	NA	NA	NA	NA	2.54197e-05	NA	0.049266	0.0370099	0.0800042	0.00322091	0.00138902	0.00177519	0.00169862	0.0649853	0.0165188	NA	0.00250484	0.00156236	0.0724448	0.0240227	NA	NA	0.0523703	NA	0.00371797	NA	0.00568274	0.00168306	0.00305162	0.00342992	0.00388201	NA	NA	NA	0.0223727	0.00593891	0.0128116	0.00558053	0.0387977
ENSG00000121905	0.0234079	0.0116005	NA	0.0142889	0.186724	0.00633021	0.0116598	0.011584	0.0087002	0.00553543	NA	0.0181776	0.00759093	0.00411401	0.00554275	0.0149002	0.00968552	0.0134704	0.0213293	0.00998477	0.0331691	0.0125406	0.00879698	0.00587649	0.0105672	0.00548226	0.0226851	0.0420808	0.0283629	0.00985214	0.00656583	0.0159582	0.0152731	NA	0.00359126	0.0348612	0.0302226	0.0978996	0.0171594	0.0115695	0.00112926	0.00959686	0.0220826	0.0056308	0.0283088	0.00500326	0.0125808	0.00463803	0.00723143
ENSG00000121900	0.0206999	0.0115436	NA	0.00935142	0.00749681	0.0119982	0.0154437	0.00704941	0.00663045	0.00249418	NA	0.0179318	0.00501667	0.00232236	0.00309074	0.0081805	0.00646899	0.011625	0.0137905	0.00609253	0.0258001	0.012921	0.00669751	0.00279476	0.0057606	0.00347249	0.0208734	0.0281469	0.0107366	0.00824374	0.00388418	0.00830608	0.0128333	NA	0.000593509	0.0271866	0.0247041	0.00111153	0.023701	0.00866843	0.00287987	0.00481533	0.0154859	0.00315928	0.0261728	0.00429707	0.0080728	0.0021044	0.00280234
ENSG00000116514	0.0114889	0.0142053	NA	0.00896759	0.0034679	0.0172217	0.0096904	0.0101601	0.00831868	0.00149317	0.00399128	0.00887106	0.00526704	0.00680088	0.00195279	0.0110002	0.00716468	0.00887309	0.00593314	0.0192048	0.00564728	0.00887414	2.54197e-05	0.00526324	0.0123948	0.00229851	0.00965405	0.0131319	0.00962109	0.00629295	0.00859608	0.00448639	0.00843207	0.00740674	0.00942593	0.0208446	0.00850974	0.00404944	0.00622382	0.00491479	0.00215411	0.018651	0.0116041	0.00687095	0.0187115	0.00392957	0.0101528	0.00381001	0.00871051
ENSG00000236065	0.0374052	NA	NA	NA	NA	NA	NA	NA	NA	2.54197e-05	NA	NA	NA	NA	0.0207502	NA	0.0104164	NA	NA	NA	NA	NA	NA	NA	NA	NA	NA	NA	0.0246636	NA	NA	NA	0.0412423	NA	NA	NA	NA	NA	NA	NA	NA	NA	NA	NA	NA	NA	NA	NA	NA
ENSG00000004455	0.00678243	0.00919355	2.54197e-05	0.0212224	2.54197e-05	0.00772055	0.0271744	0.00895911	0.00502152	0.00684864	0.00375411	0.00917489	0.00613894	0.00417053	0.00523331	0.0114905	0.00615204	0.00564027	0.00650813	0.00518011	0.00659486	2.54197e-05	0.0156967	0.00627955	0.0073398	0.00629235	0.00705154	0.00313448	0.00723057	0.0111494	0.00831621	0.00276801	0.00517486	0.0124762	0.00502191	0.00710295	0.00755283	0.00655858	0.00903908	0.0149744	0.0149601	0.00481144	0.0123695	0.00759473	0.0109098	0.00956145	0.00282927	0.00467131	0.00397963
ENSG00000142920	0.0760052	0.0344321	NA	0.0159498	0.00177424	0.0259336	0.00287306	0.0248983	0.0274281	0.0176314	NA	NA	0.0203753	0.0361077	0.00286839	0.0200938	NA	NA	0.0284095	0.0153899	0.00717089	0.00296619	0.0161389	0.0181989	2.54197e-05	0.00488856	NA	NA	0.0324024	0.00241337	0.0350907	0.014824	0.0137146	NA	0.0183489	NA	0.00550411	0.00769028	0.00463623	0.0022363	0.00805491	NA	NA	0.0523716	0.0155754	0.010018	0.00944899	NA	0.0389214
ENSG00000116525	0.00858405	0.0114914	NA	0.00889195	0.00284086	0.00770052	0.000856952	0.0027904	0.00194911	0.00684682	0.00333351	0.00894568	0.00412181	0.00652915	0.00178792	0.0131861	0.00879933	0.00319464	0.00736872	0.00135298	0.00411556	0.00578774	0.0251302	0.00218485	0.00682892	0.00443442	0.00479276	NA	0.00795836	0.0108336	0.00365777	0.00203668	0.00622122	0.0157634	0.000266392	0.00447679	0.00367799	0.00391198	0.00909566	0.00687979	2.54197e-05	0.018901	0.00787471	0.00431097	0.00773194	0.00676727	0.00419121	0.00599117	2.54197e-05
ENSG00000160094	0.00415424	0.00522782	2.54197e-05	2.54197e-05	0.00212735	0.00874258	0.00562675	0.00661612	0.00712363	0.00713626	0.0963089	0.00951055	0.00906884	0.000484664	0.00241599	2.54197e-05	0.01128	0.00619086	0.0107658	0.0158623	0.00172608	0.00790499	0.00719009	0.00225808	0.0038817	0.00443675	0.00781715	2.54197e-05	0.00554066	0.00377563	0.00613656	0.00384565	0.00659883	0.0263215	0.00326406	0.00671037	0.0182288	0.00201981	0.00732925	0.00195327	0.00622899	0.0103988	0.00518419	0.00700201	0.00179962	0.00588446	0.00314562	0.00927145	0.00278862
ENSG00000184389	0.331482	0.249314	NA	NA	0.2139	NA	NA	0.321396	0.326956	NA	NA	NA	0.235918	NA	0.0114123	NA	0.203381	0.286207	0.338576	NA	NA	NA	NA	0.329111	0.393138	NA	NA	NA	0.290233	0.218053	NA	0.167982	0.151823	0.187758	NA	0.31343	NA	0.191056	NA	NA	NA	NA	0.355978	0.273029	NA	0.212956	NA	0.251067	NA
ENSG00000225313	0.00177913	0.00166804	0.0018809	0.00245959	0.00296808	0.00298583	0.00284769	0.00245559	0.00253716	0.00224628	0.00625392	0.00233501	0.00132791	0.00196232	0.0011623	0.00181886	0.00230863	0.00144324	0.00167601	0.00303634	0.002852	0.00258992	0.00322901	0.00231609	0.001893	0.00108011	0.00234742	0.00264736	0.00123567	0.00139823	0.00151886	0.00232349	0.00408233	0.00291377	0.00494292	0.00174594	0.00242403	0.00232002	0.00277454	0.00206154	0.00285676	0.00222705	0.00163423	0.00163711	0.00174049	0.00188031	0.00230311	0.00171059	0.00273297
ENSG00000134686	0.00173667	0.00161648	0.00154798	0.00222778	0.00297534	0.00296291	0.00270831	0.00220345	0.00217253	0.00187083	0.007412	0.00197779	0.00138911	0.00183341	0.00125079	0.00172928	0.00229473	0.00137281	0.00165837	0.00290249	0.00300403	0.00233017	0.00315613	0.00220269	0.00160432	0.00115086	0.00216457	0.00257138	0.00117969	0.00124277	0.00152365	0.00222448	0.00399384	0.00282974	0.00557391	0.00157321	0.00242433	0.00206065	0.00281001	0.00204193	0.00245095	0.00212081	0.00166318	0.00163437	0.00151384	0.00180648	0.00263678	0.00163679	0.00264299
ENSG00000222112	0.0337321	0.0467733	NA	NA	NA	NA	NA	NA	NA	NA	NA	NA	NA	NA	NA	NA	0.0330654	0.0800104	0.0544	NA	NA	NA	NA	NA	0.0346409	0.00794338	NA	NA	0.0105853	NA	NA	NA	0.0481221	0.00918571	NA	0.0315439	NA	NA	NA	NA	NA	NA	NA	0.00638435	NA	NA	NA	NA	NA
ENSG00000233246	0.0297199	0.00381192	NA	2.54197e-05	0.00166636	0.0117334	0.0116824	0.0214925	0.0219794	0.0168521	NA	NA	NA	0.0118842	0.0156884	0.00904224	0.019597	0.0228856	0.0332086	0.00306517	0.00692301	0.0159921	0.018921	0.00891781	0.0345619	0.00664651	0.0132156	NA	0.0202889	0.0170561	NA	0.0100164	0.0104532	NA	0.033936	0.0244223	2.54197e-05	0.00824946	0.0134972	0.00380496	0.0060681	NA	NA	0.0226392	0.00824613	0.00928957	NA	2.54197e-05	0.0116168
ENSG00000121904	0.0497745	0.0246801	NA	0.00686526	0.020075	0.00750447	0.00827134	0.044997	0.0490498	0.0716606	NA	NA	NA	NA	0.00922144	NA	0.0248125	0.0654898	0.0931412	0.00596533	0.00354209	0.00653736	0.00751244	0.0278731	0.0425284	0.0230579	0.101135	NA	0.0397882	0.019049	0.105996	NA	NA	NA	0.0226351	0.0731076	0.00610818	0.0184502	0.0124688	0.00428532	0.0194685	NA	NA	0.0893196	NA	NA	NA	NA	NA
ENSG00000163866	0.00416615	0.0103499	0.00105224	0.0101275	0.0115966	0.00599218	0.0131317	0.00523911	0.00336251	0.00485993	0.00265351	0.0077502	0.00293725	0.00372458	0.00291174	0.00211802	0.00651024	0.00797666	0.00656132	0.0145029	0.0050949	0.00934143	0.00680169	0.00455595	0.0051532	0.00382023	0.00506018	0.0121387	0.00480053	0.00526386	0.00230279	0.00740284	0.00477838	0.014215	0.00677524	0.00757246	0.005793	0.00706759	0.00656715	0.0329533	0.00953155	0.00443731	0.0077612	0.00507001	0.00454574	0.00680079	0.00779196	0.00451433	0.00563404
ENSG00000188910	0.151857	NA	NA	NA	0.0612999	NA	NA	0.0821929	NA	NA	NA	NA	0.00384284	0.0426496	0.0217624	0.00163477	NA	NA	0.133416	NA	NA	NA	NA	0.0534068	NA	NA	NA	NA	0.082762	0.0311657	0.0033217	NA	NA	NA	NA	NA	NA	0.0333876	NA	NA	NA	0.00665735	NA	0.143383	NA	NA	0.0201272	0.0302718	NA
ENSG00000187513	0.00518685	0.0179012	0.00164762	0.0179561	0.0106659	0.0151646	0.0171779	0.00844207	0.00402281	0.00785243	NA	0.0105339	0.0106893	0.00841449	0.00816981	0.00769769	0.00890927	0.0117464	0.0086859	0.0130487	0.00848518	0.0169259	0.00778239	0.00706817	0.00851655	NA	0.00679729	0.0176432	0.00537196	0.00979085	0.00568495	0.0161467	0.00599518	0.0574104	0.0148609	0.0104781	0.0102159	0.00595697	0.0175423	0.00919994	0.0335503	0.00882206	0.0160494	0.00810877	0.00559873	0.00976391	0.00883834	0.00992946	0.00849856
ENSG00000230163	0.0305569	NA	NA	NA	NA	NA	NA	NA	NA	NA	NA	NA	NA	NA	NA	NA	0.0265126	NA	NA	NA	NA	NA	NA	0.0228859	NA	NA	NA	NA	0.0245306	NA	NA	0.0340834	0.0268346	NA	0.0195025	0.0259919	NA	NA	NA	NA	NA	NA	NA	0.0231493	NA	0.0315226	NA	NA	NA
ENSG00000241014	0.0304644	0.0249725	NA	NA	0.0065469	NA	NA	0.00592698	0.00790393	0.00905582	0.0184642	0.00058201	0.0516647	0.0128935	0.0126811	0.00572084	2.54197e-05	0.0205625	0.00806609	NA	NA	NA	NA	0.031774	0.0194783	0.00735111	NA	NA	0.00704866	0.0061284	0.0334303	0.0122268	0.015343	0.0511866	0.00193567	0.0318347	NA	0.0443627	NA	NA	NA	0.0053169	0.0138344	0.0318169	0.029013	0.0165182	0.0270933	0.00663777	0.0190027
ENSG00000243749	0.00778501	0.0139417	NA	NA	NA	NA	NA	0.00969183	0.00652072	0.00525636	0.0139648	0.00683719	0.0140974	0.00501682	0.00698109	0.00683374	0.00970833	0.00513352	0.00370814	2.54197e-05	NA	NA	NA	0.00742917	0.0058925	0.00421453	0.0127069	0.00945349	0.00685917	0.00271817	0.0222554	0.00919292	0.008545	0.0186397	0.0132765	0.00950244	NA	0.0135683	NA	NA	NA	0.0183964	0.00409834	0.0116434	0.00736918	0.00685231	0.0199859	0.0139526	0.00762603
ENSG00000163867	0.00883777	0.0154014	NA	2.54197e-05	0.00723932	0.00317836	0.0670612	2.54197e-05	0.00506911	0.0081864	0.0024688	0.00693559	0.0101627	0.00860052	0.00199397	0.00555587	0.0262718	0.00708812	0.0153176	0.00624386	0.0255575	2.54197e-05	0.0289897	0.0117496	0.00542842	0.00827243	0.0172213	0.0363312	0.0151792	0.0143513	0.0190548	0.00687471	0.0132945	0.037624	0.00800358	0.0146116	0.0327815	0.0107891	0.00171487	2.54197e-05	0.0224643	0.0141588	0.0212041	0.00900398	0.00928316	0.0222943	0.000263061	0.0111357	0.00979168
ENSG00000197056	0.0354632	0.0337212	NA	NA	NA	NA	NA	0.0127789	0.0106266	0.0279367	NA	2.54197e-05	0.0168206	0.0169653	0.00360549	0.0103309	0.017682	0.0239813	0.0261243	NA	NA	NA	NA	0.0246849	0.0133023	0.00621584	0.0400007	NA	0.02517	0.0464402	0.0248152	0.0199708	0.0281916	NA	0.0149019	0.0222658	NA	NA	NA	NA	NA	0.0117765	NA	0.012967	0.02478	0.0117453	2.54197e-05	0.0153082	0.0131216
ENSG00000116560	0.00331088	0.00371589	NA	0.00125334	0.0014124	0.0058488	0.0053104	0.0030771	0.00280129	0.00255149	0.00327043	0.00480797	0.00401935	0.00243198	0.00212482	0.00385998	0.00404274	0.00121898	0.00364029	0.00325534	0.00501218	0.00188172	0.00128075	0.00194646	0.00190034	0.00352846	0.000877395	0.00365978	0.00272612	0.0021468	0.00484209	0.000628232	0.00139725	0.00417424	0.00327516	0.00274576	0.000523891	0.00183079	0.0001712	0.00232696	0.00447481	0.00380526	0.00208402	0.00327083	0.00240492	0.00360729	0.000751583	0.00167857	0.00156518
ENSG00000146463	0.0392922	0.0185876	NA	0.043809	2.54197e-05	0.139154	0.00647228	0.0177931	0.0302978	0.0269973	2.54197e-05	0.0116139	0.0267959	0.0137154	0.0087553	0.0120602	0.00449219	0.00733296	0.0090691	0.0333166	0.00908077	2.54197e-05	2.54197e-05	0.0236412	0.0205921	0.00187571	2.54197e-05	NA	0.0119134	0.0206762	0.0254461	0.0115732	0.0130959	NA	2.54197e-05	0.0238332	0.016747	0.0210881	2.54197e-05	0.010597	2.54197e-05	0.0144315	0.00811026	0.0174554	2.54197e-05	0.0285442	0.0237303	0.0212864	0.0144974
ENSG00000142687	0.00737177	0.00457686	2.54197e-05	2.54197e-05	0.00850039	2.54197e-05	0.00588506	0.00606632	0.00628091	0.00964285	0.00829321	0.00748444	0.0053914	0.0007993	0.00212619	0.00289927	0.00353923	0.0093423	0.00787174	0.00448958	0.00329762	0.00448831	2.54197e-05	0.00275914	0.00437003	0.00043382	0.00579395	0.00213912	0.0113868	0.00595381	0.00946322	0.00605559	0.00652407	0.0141167	0.00529595	0.00431157	2.54197e-05	0.00497851	0.00270944	0.0100633	0.0172208	0.00755725	0.0120116	0.00807296	0.0104243	0.0100489	0.00590784	0.00499503	0.00443136
ENSG00000020129	0.00846431	0.00587565	NA	0.0338372	0.0122786	0.049961	0.0464049	0.00438364	0.0114006	0.00413532	0.00847244	0.00972702	0.00600637	0.000511602	0.00243623	0.00326907	0.013805	0.00421914	0.0249826	0.0900653	0.00778393	0.00633507	0.0141033	0.00826728	0.00162734	0.0122577	0.0073924	0.0449244	0.0149051	0.00460779	0.0272921	0.00532553	0.0062836	0.0348369	0.00410683	0.00633576	0.052056	0.0122072	0.0633761	0.0781809	0.00725592	0.0131989	0.0579653	0.0130301	0.0124636	0.0154146	0.0196994	0.00990384	0.00417036
ENSG00000126067	0.0294045	0.058591	NA	0.0720279	0.0813981	0.0366149	0.0757864	0.0218029	0.0454852	0.0285189	0.00945185	0.0240209	0.0196323	0.010996	0.0166907	0.0356423	0.0247403	0.0394247	0.0153669	0.0520647	0.0755008	0.0490079	0.0394089	0.0134431	0.0461834	0.0164662	0.0115513	0.0767448	0.0402224	0.0269548	0.0281896	0.0275581	0.0286076	0.0563811	0.0212946	0.0405894	0.0707958	0.0458809	0.0547034	0.0642186	0.0600397	0.0149871	0.0882404	0.0241303	0.0371926	0.0322778	0.0199036	0.0161429	0.0329015
ENSG00000142686	0.0195849	0.00897916	NA	0.00251306	9.72823e-05	0.0069395	2.54197e-05	0.0028906	0.000856277	0.00619204	0.0260289	NA	0.0234951	0.0183701	0.00372775	0.00212956	0.0160721	0.00837982	0.00732121	0.00248933	0.00314545	0.00529739	0.0185499	0.00659731	0.000895449	0.00731314	0.00253134	NA	0.00379981	0.0168724	0.00988613	0.0122692	0.01367	0.0210319	0.00398745	0.0088986	0.00468263	2.54197e-05	0.00207519	0.005644	2.54197e-05	0.0132403	NA	0.0410149	0.0186778	0.030524	0.00190673	0.00802262	0.0110558
ENSG00000134698	0.00660338	0.00335891	0.00458946	0.011966	0.00715418	0.0359944	0.0280621	0.0027676	0.00404167	0.00571068	0.0177009	0.00231486	0.00574591	0.0094976	2.54197e-05	0.00726555	0.00673152	0.0091025	0.00974403	0.0145348	0.0113361	0.0189676	0.0293078	0.00235363	0.00422392	0.0043966	0.00938101	0.00628819	0.0117901	0.0135353	0.00534471	0.00177261	0.00503966	0.00423204	0.007412	0.01377	0.0007959	0.00987297	0.00764319	0.0184447	0.0274445	0.00475845	0.016453	0.00470621	0.0101386	0.00543387	0.00191562	0.0053582	2.54197e-05
ENSG00000092847	0.0105176	0.0157599	NA	2.54197e-05	0.00430396	0.0216784	0.00714078	0.00893405	0.00335418	0.0101886	2.54197e-05	0.0133035	0.0138878	2.54197e-05	0.00464808	0.00309085	0.013463	0.00420131	0.0188968	2.54197e-05	0.00812962	0.00419992	0.0187724	0.00329262	0.00418356	0.00555729	0.0100822	NA	0.00640517	0.00201333	0.0163262	0.00482185	0.0176319	0.0272665	0.00519161	0.00914106	0.00525837	0.00963376	0.00132837	0.0118022	0.0164339	0.00476814	0.0105694	0.00699977	0.00701854	0.00717708	0.0074565	0.00592258	0.0114155
ENSG00000126070	0.0144352	0.00477761	0.000591688	0.0171312	0.00127391	0.00260159	0.0173735	0.00662205	0.00391421	0.0123621	0.0497796	0.0139737	0.0155244	0.0190152	0.00488542	0.0100925	0.0112295	0.000653027	0.0135221	0.0173077	0.0118154	0.00819589	0.0216384	0.00279605	0.00814296	0.00175253	0.00656512	0.00844249	0.00701646	0.0210016	0.0151085	0.0126157	0.00769784	0.0427396	0.00962729	0.0144172	0.0153817	0.00200501	0.00342268	0.00649213	2.54197e-05	0.00934406	0.0308397	0.015622	0.00151534	0.00690776	2.54197e-05	0.0065987	0.0114671
ENSG00000116863	0.0140835	0.0168183	NA	2.54197e-05	2.54197e-05	2.54197e-05	NA	0.0154313	0.00802057	2.54197e-05	0.0011904	0.00730789	0.00279539	0.012611	0.00753587	2.54197e-05	0.00913498	2.54197e-05	0.00197533	0.0120956	0.0113491	0.0519619	NA	0.0019557	0.00187151	0.00121725	0.00981739	0.00283272	0.00497604	0.0119225	0.00677563	2.54197e-05	0.0125696	0.00591156	0.00509007	0.00668909	0.0183252	0.0120842	0.0130421	0.0154718	2.54197e-05	0.00102246	NA	0.00460727	0.0147171	2.54197e-05	0.0159068	0.00170581	2.54197e-05
ENSG00000171812	0.0107708	0.0117808	NA	NA	0.00856572	NA	NA	0.0188273	0.0100423	0.00920063	NA	NA	0.019046	0.0152972	0.0271869	0.0110266	0.0133108	0.0119693	0.0110765	NA	NA	NA	NA	0.0222431	0.00662252	0.0197129	0.0030368	NA	0.00533161	0.0198814	0.0148437	0.00329639	0.038518	0.116181	NA	0.0102539	NA	0.0118499	NA	NA	0.0581342	0.0185254	NA	0.0261594	0.000541693	0.00704763	0.0152623	0.00318295	0.0191578
ENSG00000054116	0.00834747	0.00587035	0.0409832	0.0143302	0.00481813	0.00880494	0.0148428	0.0021952	0.0067375	0.0157709	0.00157022	0.00666549	0.0049835	0.00570366	0.00719198	0.010023	0.0106618	0.0101538	0.00505683	0.0112762	0.00746244	0.00830284	0.0064675	0.00762236	0.0075096	0.0108254	0.00811309	0.0100537	0.00587775	0.00872874	0.00681016	0.00200221	0.01178	0.0115972	0.00566662	0.0129767	0.00222804	0.00741452	0.00479763	0.00782443	0.0150995	0.00689258	0.0100805	0.0086825	0.00106024	0.00428082	0.00962039	0.00596417	0.0112005
ENSG00000116871	0.00377747	0.00308732	0.00621467	0.00259383	0.00400755	0.00123532	0.00219258	0.00181641	0.00271804	0.00334168	0.00542024	0.00591115	0.00455717	0.00366289	0.0049299	0.00602715	0.00270239	0.00311417	0.00192598	0.00356387	0.00341184	0.00211572	0.00233598	0.00317444	0.00278314	0.00180753	0.00429491	0.00527857	0.00191396	0.00189833	0.00373671	0.00439802	0.00447235	0.0180181	0.00215074	0.00275894	0.00350597	0.00299483	0.00150293	0.000816898	0.000924299	0.00722993	0.00369117	0.00332364	0.00160058	0.00289633	0.00360149	0.00326544	0.00245525
ENSG00000054118	0.00244072	0.00322166	0.00364822	0.00411334	0.00571271	0.00190759	0.00982206	0.00312233	0.00191006	0.0021545	0.0011129	0.00274091	0.00419157	0.00374895	0.0030456	0.00693149	0.00357508	0.0033465	0.00346121	0.0061687	0.00364952	0.00351773	0.0175995	0.00507082	0.00286232	0.00128781	0.00404562	0.00214183	0.00525334	0.00482599	0.00343194	0.00365154	0.00328378	0.00732006	0.00113205	0.00320232	0.00321932	0.00369976	0.00494275	0.00718192	0.00626183	0.0024281	0.00628154	0.00388084	0.00122173	0.00675198	0.00131401	0.00315682	0.00311075
ENSG00000214193	0.00707342	0.00683021	0.00503609	0.0268929	2.54197e-05	0.0153727	0.0197248	0.01407	0.0131701	0.018544	0.00798695	0.00851386	0.00483575	0.0199021	0.00619451	0.00662582	0.00835704	0.00655436	0.0046753	0.0112786	0.0236896	0.0144804	0.0132412	0.0272129	0.00727298	0.00158168	0.00480759	0.0126316	0.00884667	0.0143069	0.00392525	0.00641361	0.0129284	0.0171943	0.00886236	0.00868698	0.0150381	0.00498251	0.012561	0.0242287	0.0240842	0.00733387	0.0146251	0.00894166	0.00659094	0.00371546	0.00789719	0.00785122	0.00696185
ENSG00000142694	0.00859384	0.00722774	NA	0.019991	0.0156237	0.00463196	0.00523547	0.0153071	0.0126455	0.0139554	0.0276647	0.00730457	0.0183386	0.0270584	0.014308	0.0123809	0.00918033	0.00684727	0.00802998	0.0229564	0.0355026	0.00704447	0.01783	0.0165139	0.00703194	0.00184726	0.00629095	0.00822282	0.00917259	0.0168169	0.0187547	0.00645477	0.0274528	0.0210021	0.0101924	0.0100858	0.0245011	0.0187382	0.0291749	0.029237	0.0419848	0.0159867	0.0138064	0.00922304	0.00849883	0.0017149	0.0175769	0.00833133	0.00659769
ENSG00000116883	0.0360541	0.0181352	NA	0.00864312	0.0187007	0.0338418	0.0175052	0.0374717	0.0309173	0.0372633	0.152299	NA	0.0336316	0.0562812	0.00957852	0.0239508	0.0308647	0.0237883	0.0343764	0.0287117	0.01327	0.0182711	0.0142036	0.0618748	0.0300859	0.0248437	0.0357516	NA	0.0255433	0.0242287	0.028427	0.0235196	0.0625586	NA	0.0230838	0.0306987	0.01234	0.0159704	0.0121138	0.0161823	0.0365469	0.0636429	0.0357301	0.0363273	0.0165772	0.028895	0.0416516	0.0562538	0.0250462
ENSG00000196182	0.00416804	0.0024018	2.54197e-05	0.00911964	0.00821824	2.54197e-05	0.00337448	0.0019452	0.00260715	0.00154818	0.00518243	0.00264989	0.00337363	0.00260363	0.00117268	0.00372729	0.00268885	0.00511018	0.00396172	0.00392539	0.00468377	0.000677553	2.54197e-05	0.00299062	0.00249867	0.00416106	0.00330149	0.00286376	0.00644554	0.00618383	0.00433392	0.00262849	0.00471483	0.00194464	0.0112035	0.00530459	0.00340394	0.00502281	0.00236806	0.00403283	0.00543615	0.00330742	0.00162835	0.00412023	0.00156774	0.00490369	0.00267771	0.00314737	0.00332267
ENSG00000181817	0.00409062	0.00392696	0.000182868	0.00508917	0.00583572	0.00547706	0.00457065	0.00135803	0.00398345	0.00340105	2.54197e-05	0.00501517	0.00489732	0.00286428	0.00075055	2.54197e-05	0.00467476	0.00302906	0.00370396	0.00410244	0.00542994	0.00393311	0.00489894	0.00488305	0.00259846	0.00165586	0.00154042	0.00588133	0.00519433	0.00431709	0.00496222	0.00238414	0.00492146	0.00591404	0.00853044	0.00680553	0.00413907	0.00693171	0.00903577	0.00509845	2.54197e-05	0.00346552	0.00363286	0.00352001	0.00620787	0.00371422	0.00529805	0.00259802	0.00155025
ENSG00000116885	0.0107786	0.0131585	0.0102739	0.016757	0.006007	0.0101872	0.00482419	0.0063102	0.00569035	0.020083	0.14451	0.00709773	0.0075108	0.0153969	0.0242757	0.00516141	0.0076562	0.00812451	0.00684817	0.00648272	0.00243323	0.0111169	0.00333897	0.00341778	0.00830815	0.000402817	0.0114892	NA	0.012602	0.00766937	0.0149177	0.00876468	0.00798486	NA	0.00295784	0.00879643	0.00528381	0.0143111	0.00669814	0.00855341	0.00972223	0.0143675	0.0155465	0.00494404	0.0118201	0.00826442	0.00443258	0.00686094	0.018911
ENSG00000116898	0.00542289	0.00401476	2.54197e-05	0.00196234	0.00203358	0.00430263	0.00312287	0.00428222	0.00386622	0.00215751	0.000721214	0.00480881	0.0034211	0.00193668	0.00440764	0.00411809	0.00355977	0.00587931	0.00508558	0.00648721	0.00709416	0.00356203	0.0151477	0.00165899	0.00220838	0.00192202	0.00147089	2.54197e-05	0.00562732	0.00644088	0.00704349	0.00397817	0.00273606	0.00665499	0.000300456	0.00534258	0.00382182	0.00318852	0.00175436	0.000762083	0.013308	0.00267428	0.0045542	0.00540515	0.00814521	0.00468129	0.00253723	0.00341001	0.00272205
ENSG00000119535	0.0227163	0.0229175	0.0256139	0.0370082	0.055886	0.0331871	0.0190037	0.0228086	0.021638	0.0249168	NA	0.0655087	0.053916	0.0136681	0.0284762	0.0161777	0.0130396	0.0224196	0.0229888	0.0123289	0.0198284	0.0127236	0.0194401	0.0369403	0.0246715	NA	0.0370197	0.0222471	0.0256545	0.0179725	0.081811	0.0126748	0.0156239	0.0136574	0.0206833	0.0384086	0.037811	0.0933234	0.0201284	0.0451415	0.0198456	0.0252664	0.024428	0.0146379	0.0876785	0.012862	0.0329979	0.0198631	0.0317306
ENSG00000233621	0.0710935	0.0476795	NA	NA	NA	NA	NA	0.0464783	0.0673706	0.0732942	NA	0.0205538	0.0368697	0.0109068	0.0183963	0.0594478	0.0757137	0.0529989	0.0450267	NA	NA	NA	NA	0.0293071	0.0810374	0.0421505	0.113965	0.0215174	0.0466409	0.0138737	0.0323416	0.0264424	0.0343915	0.026216	0.0389446	0.0575041	NA	NA	NA	NA	0.124752	0.0265448	0.0176242	0.0177262	0.0459825	0.0259282	0.00499817	0.0242397	0.124288
ENSG00000163874	0.0171854	0.0102234	0.0211561	NA	NA	NA	NA	0.00457248	0.00354143	0.00400131	0.00333337	0.00884678	0.00442971	0.00660273	0.0166905	0.00485667	0.005142	0.00413084	0.00688193	NA	NA	NA	NA	0.00329245	0.00908609	2.54197e-05	0.00596218	0.00808886	0.0312912	0.0195192	0.00732381	2.54197e-05	0.0124958	0.00662423	0.0148156	0.0127473	NA	NA	NA	NA	NA	0.00510533	0.0112755	0.00563607	0.0213597	0.00859667	0.00656394	0.00247335	0.0162428
ENSG00000163875	0.00476689	0.0043628	0.00937141	0.0021521	0.00494156	0.00658025	0.00332288	0.00383077	0.00437979	0.00560625	0.00432461	0.00378698	0.00352882	0.00305056	0.0084761	0.00417779	0.00570559	0.00612231	0.00458588	0.00262572	0.00427811	0.00445799	0.00542374	0.00491516	0.00549525	0.00537645	0.00731281	0.00971407	0.0055471	0.00916378	0.00430758	0.00805107	0.00493176	0.0108883	0.00520079	0.00573108	0.00392494	0.00496823	0.00383113	0.00312935	0.00540612	0.00367719	0.00343717	0.00388125	0.00413658	0.00355076	0.00138366	0.00391638	0.00387071
ENSG00000163877	0.0256915	0.0278966	NA	0.0278317	0.0131296	0.0383246	0.0516541	0.017785	0.0130972	0.0260942	0.0110801	0.0297892	0.0159674	0.00887164	0.00998464	0.0169616	0.0327244	2.54197e-05	0.0214436	0.0280864	0.0342796	2.54197e-05	0.0105952	0.0149634	0.0133607	0.00769091	0.0175986	0.020746	0.0260898	0.0689192	0.0186881	0.0192091	0.0277045	0.0352114	0.00611288	0.0496807	0.0545258	0.00889456	0.00216267	0.0240261	0.000109133	0.0153024	NA	0.0226572	0.0196411	0.00650072	0.0016367	0.0126199	0.0119093
ENSG00000163879	0.0308073	0.0326671	0.0162279	0.0179193	0.0391802	0.0198991	0.0302868	0.0311334	0.0186733	0.022681	NA	0.0101225	0.0510428	0.0215296	0.00207169	0.0238169	0.0237088	0.0239548	0.0157423	0.0238687	0.0195863	0.0189574	0.0257273	0.0265005	0.019161	0.0340414	0.080936	0.0281692	0.0145958	0.0145941	0.0551108	0.0197263	0.0136747	NA	0.0310469	0.033518	0.019497	0.0235869	0.0236543	0.0335639	0.0221462	0.0378747	0.00738044	0.0130217	0.00956367	0.0134092	0.0228904	0.017012	0.0141004
ENSG00000134697	0.0390497	0.0520921	NA	NA	0.088815	NA	NA	0.0688019	0.0430759	0.0466523	0.0137543	0.101446	0.0302571	0.0447501	0.0264188	0.0425423	0.0268592	0.0375063	0.0467787	0.0957619	0.102474	0.0290431	NA	0.0825207	0.057901	0.043196	0.044351	0.0666649	0.0416492	0.0394543	0.0420066	0.0264084	0.0514429	0.0760788	0.0324757	0.0430385	NA	0.0885518	0.0299355	NA	NA	0.0676893	NA	0.0375278	0.0259199	0.0349701	0.0351189	0.08762	0.0274935
ENSG00000169218	0.126924	NA	NA	NA	NA	NA	NA	0.0837961	NA	NA	NA	NA	0.0103553	0.0230934	NA	0.0153068	0.00700317	NA	0.0252883	NA	NA	NA	NA	0.0573168	0.0361703	NA	NA	NA	NA	0.0336405	0.0110054	NA	NA	NA	NA	0.12945	NA	NA	NA	NA	NA	0.00661826	NA	0.0121704	0.067707	NA	NA	0.0309199	0.00738504
ENSG00000116922	0.00645895	0.00719374	0.000771409	0.00271592	0.00524559	0.0137741	0.0201065	0.00668355	0.00774561	0.00751878	0.00152597	0.00923049	0.00719616	0.0110379	0.00436739	0.000395077	0.00482694	0.00886775	0.00618513	0.0129159	0.0043761	0.00491903	0.00929394	0.00636808	0.00427989	0.00304732	0.00486209	0.00404645	0.00664562	0.0087779	0.00794347	0.0102332	0.00742418	0.0364715	0.00572114	0.0074811	0.00797439	0.0058942	0.00311978	0.00331773	0.000802252	0.00434652	0.00850961	0.00981238	0.00670002	0.00762301	0.00517239	0.00376244	0.00646424
ENSG00000134690	0.0267724	NA	NA	NA	NA	NA	NA	2.54197e-05	NA	NA	0.00392833	NA	0.00963082	0.0117643	0.00255921	0.00552818	0.0470945	NA	0.0464604	0.048094	NA	NA	NA	0.00518802	NA	0.002755	NA	NA	NA	NA	0.013186	0.00696945	0.0520476	0.0234198	2.54197e-05	NA	NA	NA	NA	0.042939	NA	0.00204009	NA	0.0177379	NA	NA	0.0149592	0.00657251	NA
ENSG00000196449	0.00754464	0.0129687	0.0131905	0.00281444	0.00585748	0.00705529	0.0140019	0.00677121	0.00427754	0.0136306	0.00411692	0.00774414	0.00132148	0.00331256	0.0010909	0.00973945	0.00692887	0.00774472	0.00395807	0.00466571	0.00753738	0.00830467	0.00810419	0.00441601	0.00497422	0.00561823	0.00835857	0.00829958	0.00934846	0.0059249	0.00671065	0.0015802	0.0109471	0.0168981	0.00513428	0.00831531	0.00234653	0.00306922	0.0073771	0.00411191	0.0143842	0.00422217	0.00635475	0.00504439	0.0115679	0.00591727	0.00439091	0.00315604	0.022248
ENSG00000197982	0.00134897	0.00548647	NA	NA	NA	NA	NA	0.000302411	0.00132988	0.00702179	NA	0.00949759	0.000500138	0.00667574	0.0107273	NA	0.00320287	2.54197e-05	0.00632988	NA	NA	NA	NA	2.54197e-05	0.00534602	0.00342731	2.54197e-05	0.0305292	0.00501548	2.54197e-05	0.0186157	0.00522071	0.00226483	2.54197e-05	0.00560321	2.54197e-05	NA	NA	NA	NA	NA	0.00259739	NA	0.00333643	NA	0.0123035	0.00139726	0.00946447	NA
ENSG00000188786	0.0114057	0.0134465	0.0209513	0.00862523	0.00505168	0.0106416	0.0077915	0.00356199	0.0011392	0.0103245	2.54197e-05	0.0140139	0.00484258	0.00280527	0.00335003	0.0131666	0.00415217	0.0140546	0.00677341	0.00899252	0.00750599	0.0176261	0.0117629	0.00911689	0.00214581	0.00086632	0.000965675	0.0147162	0.0109104	0.0217052	0.00844954	0.00222244	0.0193238	0.00697998	0.00706937	0.00814523	0.00764356	0.00593217	0.0111314	0.0113277	0.00523707	0.00537465	0.00729709	0.00634757	2.54197e-05	0.0192523	0.00741396	4.81466e-05	0.00833939
ENSG00000204084	0.0194953	0.025531	0.0247072	0.0199986	0.0217682	0.0197187	0.0178036	0.0262391	0.0332067	0.0139719	0.014159	0.0241037	0.0114367	0.0224327	0.00841776	0.018087	0.0235418	0.0262176	0.0179231	0.0215873	0.0160534	0.0145644	0.0078802	0.022977	0.0357995	0.0048544	0.014223	0.0142482	0.0168263	0.0159758	0.0145994	0.0313594	0.0131141	0.0458939	0.0181584	0.0306452	0.0132357	0.0269999	0.0146525	0.0153457	0.0134271	0.0184549	0.0109625	0.0229067	0.016267	0.0224561	0.0139159	0.0235975	0.0163499
ENSG00000183431	0.00595103	0.00565162	0.00626091	0.00755792	0.00592444	0.0164722	0.00889838	0.00446399	0.00400204	0.00500386	0.00148444	0.00475187	0.00463609	0.00189876	0.00189131	0.00115333	0.00593716	0.00910217	0.00512141	0.00501459	0.00570429	0.00459132	0.00617712	0.00343	0.00448896	0.00157049	0.00578745	0.00462601	0.009994	0.00600279	0.00733269	0.00814448	0.00368162	0.0295823	0.00448477	0.00579331	0.00436004	0.00375404	0.00571248	0.00506852	0.00922953	0.0038888	0.00276494	0.0173994	0.00743241	0.00312818	0.00650444	0.00403739	0.00300964
ENSG00000183386	0.012417	0.0152916	0.00882265	0.0145317	NA	0.0423902	0.00486332	0.00574111	0.00494351	0.0133678	0.0721044	0.0259941	0.0101856	0.0106253	0.00406021	0.00926022	0.00756758	0.0106388	0.0127691	0.0241063	0.00723477	0.00728049	0.00343555	0.0036063	0.00528047	0.00365331	0.00557748	0.0149534	0.00842153	0.00763653	0.00960184	0.0286366	0.013427	0.0766175	0.0304388	0.011582	0.0386547	NA	0.00941247	0.0068839	0.00383227	0.00929935	0.00778805	0.0145353	0.00641279	0.0121782	0.00757132	0.0109622	0.00317692
ENSG00000183520	0.0434429	0.0302304	NA	NA	0.029957	0.0826803	NA	0.02843	0.0296451	0.0190147	0.0055811	0.00550657	0.0137446	0.024909	0.0146756	0.0486834	0.031952	0.0230162	0.0284663	0.0138596	NA	0.136566	NA	0.0177797	0.0390703	0.0219798	0.021319	0.0171939	0.0340487	0.0382832	0.0455851	0.0283151	0.0264413	0.0973196	0.0225517	0.0325516	NA	0.066834	NA	NA	NA	0.0145282	NA	0.037496	0.0255462	0.0146133	0.013256	0.0150262	0.0694892
ENSG00000116954	0.00318854	0.00610472	NA	0.0194144	0.000228538	0.00913934	2.54197e-05	0.000906492	0.0043323	0.00392809	2.54197e-05	2.54197e-05	0.00138313	0.00149206	0.00326984	0.00353628	0.00372676	0.0088873	0.00563978	0.00282701	0.000709529	0.00798083	0.0308406	0.00107312	0.00805585	0.00101599	0.0022837	0.0267533	0.0055511	0.0163322	0.00542786	0.000219731	0.00640142	0.0145253	0.00136605	0.00328248	0.00890312	0.00216709	0.00576722	0.00154485	0.00576697	0.00222376	2.54197e-05	0.00737564	2.54197e-05	0.0128556	0.00188896	0.000988103	2.54197e-05
ENSG00000228436	0.0138867	0.012215	0.00581093	0.00552433	0.00420938	0.00995964	0.00844538	0.0044311	0.00522282	0.011352	0.00424764	0.00674649	0.00565052	0.0113649	0.00489618	0.00167477	0.0108078	0.0106861	0.0114846	0.00255846	0.00232327	0.00200946	0.0076036	0.00378435	0.00993727	0.00402294	0.0117252	0.00969761	0.0101285	0.0146565	0.00509132	0.0137379	0.00520471	0.0152586	0.0016872	0.0165551	0.016463	0.00228619	0.0142368	0.0125404	0.00524657	0.00359923	0.00930453	0.00488231	0.0108068	0.00301843	0.00500373	0.00247069	0.012362
ENSG00000214114	0.0417006	0.0505639	NA	NA	NA	NA	NA	0.0193719	0.0366971	NA	0.00662422	0.0130621	0.0124969	0.0102282	0.00762216	NA	0.0607658	0.0569739	0.0831854	NA	NA	NA	NA	2.54197e-05	0.0205092	0.00371759	0.0163043	NA	0.0533311	0.0465409	0.141442	0.011107	0.0311475	0.0596441	0.0131222	0.026138	NA	NA	NA	NA	NA	0.00334123	NA	0.0431337	NA	0.0371104	0.00945866	0.0327363	NA
ENSG00000158315	0.0249758	NA	0.0116202	0.0130331	0.00794764	0.0112328	0.0105827	0.018809	0.019115	0.021291	NA	NA	0.00740059	0.0546007	0.00619288	0.00125335	0.033306	0.064485	0.0375344	0.00588136	0.00273064	0.00571711	0.0124057	0.00708129	0.0171309	0.0157931	0.0334345	NA	0.0353586	0.0165545	0.00791083	NA	0.0359279	NA	0.0178926	0.0795387	0.0193025	0.00843871	0.0104349	0.0101648	0.00612111	0.00649759	NA	0.0168736	0.0246045	0.011282	0.0124013	0.00446938	0.0263135
ENSG00000174574	0.00621546	0.00398899	2.54197e-05	0.00393057	0.00304659	0.0133495	0.00200754	0.00233932	0.0028799	0.00406628	0.0049131	0.00362611	0.00468782	0.0027092	0.00135393	0.00102909	0.00258506	0.00207826	0.00399769	0.00271959	0.00482697	0.00556991	0.0152956	0.00297599	0.00201246	0.00299673	0.00366101	0.00886331	0.00471923	0.00454844	0.00541059	0.0024436	0.00406858	0.00648264	0.00123679	0.00287637	0.00351229	0.00343555	0.00196217	0.00339843	0.0228298	0.00436602	0.00159079	0.00309765	0.00169174	0.00257865	0.00345274	0.00178624	0.00437719
ENSG00000168653	0.00566084	0.00679655	NA	0.000483377	0.00567219	0.00634204	0.000111827	0.0109562	0.0180328	0.00541635	0.0135753	0.00896827	0.0212636	0.01494	0.0537896	0.00416699	0.00656928	0.00565309	0.0164031	0.00248292	0.00449238	0.00553638	0.00643811	0.0105684	0.0124026	0.0127523	0.00940696	0.0127931	0.00869817	0.0158204	0.012664	0.006818	0.0215016	0.0189369	0.00797476	0.0108458	0.00199817	0.00341773	0.00180248	0.00280659	0.00619645	0.00879134	0.0171205	0.0280734	0.0506057	0.00423018	0.0184208	0.0081838	0.0327096
ENSG00000127603	0.00163112	0.00156224	2.54197e-05	0.0015108	0.00134811	0.00159594	0.00103713	0.000916585	0.000959389	0.000429267	0.00356065	0.00240669	0.0029625	0.00335637	0.000928318	0.00165607	0.00322043	0.00144408	0.00202037	0.00171193	0.00199634	0.00162955	0.00169348	0.00202005	0.000930467	0.00176961	0.00254867	0.00407619	0.00255275	0.00227093	0.00409811	0.00230897	0.002967	0.00591127	0.00198517	0.00108111	0.00287999	0.00103767	0.0013808	0.00693252	0.000994385	0.00177095	0.00297701	0.000710714	0.0024707	0.00216509	0.00248171	0.00102366	0.000901974
ENSG00000183682	0.592643	0.782167	0.765365	0.766877	0.893867	0.893867	0.893867	0.817767	0.741068	0.245446	0.893867	0.117606	0.893867	0.788659	0.0570931	0.653544	0.528729	0.625781	0.893867	0.781282	0.512519	0.860956	0.824362	0.62706	0.893867	0.666362	0.28708	0.408572	0.432682	0.870667	0.893867	0.893867	0.275076	0.893867	0.893867	0.52858	0.544778	0.891936	0.560892	0.531175	0.559721	0.893867	0.893867	0.743134	0.336741	0.893867	0.893867	0.556291	0.355514
ENSG00000182109	0.553556	0.893867	0.685651	0.411693	0.893867	0.412547	0.489403	0.768523	0.651996	0.189372	0.893867	0.102272	0.893867	0.679725	0.0378813	0.545048	0.461857	0.641869	0.893867	0.392252	0.287243	0.61934	0.357729	0.49494	0.827336	0.855681	0.20734	0.459983	0.297955	0.660386	0.893867	0.893867	0.0750946	0.893867	0.893867	0.623947	0.266195	0.893867	0.269684	0.256722	0.179373	0.893867	0.893867	0.71661	0.227188	0.893867	0.893867	0.501417	0.290722
ENSG00000243970	0.893867	0.893867	0.893867	0.893867	0.893867	0.893867	0.893867	0.893867	0.893867	0.79801	0.893867	0.249756	0.893867	0.893867	0.29626	0.893867	0.893867	0.893867	0.893867	0.893867	0.893867	0.893867	0.893867	0.893867	0.893867	0.893867	0.893867	0.749261	0.893867	0.893867	0.893867	0.893867	0.870586	0.893867	0.893867	0.893867	0.893867	0.893867	0.893867	0.893867	0.893867	0.893867	0.893867	0.893867	0.893867	0.893867	0.893867	0.893867	0.893867
ENSG00000090621	0.0162202	0.0100545	0.0214223	0.0168742	0.0266948	0.0209967	0.0129311	0.0184211	0.00983694	0.00517496	0.018156	0.00654547	0.0108889	0.0101932	0.00643401	0.00835203	0.0120499	0.00722338	0.0114863	0.0190725	0.00978461	0.00691889	0.00823607	0.00829125	0.0125273	0.0162467	0.00542473	0.0188716	0.0111881	0.0182212	0.0118331	0.00878395	0.0087726	0.0108179	0.0104005	0.012079	0.00639713	0.0266369	0.0184172	0.0122744	0.0223282	0.0202674	0.0237553	0.0113932	0.00362357	0.0135201	0.0168302	0.0112061	0.00574776
ENSG00000228060	0.0171889	0.0124271	NA	NA	0.0168612	NA	NA	0.0132412	0.00676102	0.00606257	0.00369913	0.00844748	0.00783474	0.00697237	0.00408057	0.00637311	0.0115009	0.0143719	0.00975299	2.54197e-05	0.0198084	NA	NA	0.00827849	0.00828763	0.00825292	0.00201774	0.00199394	0.0147501	0.00482917	0.0177944	0.0180578	0.00414567	0.0193145	0.00306841	0.0122182	NA	0.00405895	0.034814	NA	0.0100209	0.00874566	0.0198505	0.00845193	0.00475747	0.0130961	0.0107667	0.00342868	0.00547955
ENSG00000163909	0.0108813	0.00688496	0.0235241	0.00348822	0.00715508	0.0397922	0.0156833	0.00835077	0.00486879	0.00319897	NA	0.00182423	0.0147501	2.54197e-05	0.00241102	0.00372247	0.00581919	0.00432584	0.0102062	0.0153995	0.0131901	0.00607708	0.00850079	0.00659865	0.00622091	NA	0.00297413	0.0283104	0.0109696	0.00455081	0.0262751	0.00476738	0.00387863	NA	0.00438688	0.00472983	0.040349	0.013741	0.026375	0.0101475	0.0138015	0.00111244	0.00391876	0.00465434	0.00539302	0.00659361	0.0144508	2.54197e-05	0.00333686
ENSG00000084072	0.0879339	0.0483692	0.0595492	0.0309392	0.0218505	0.0424321	0.030841	0.0281224	0.0148785	0.0340556	0.080182	0.0803545	0.13568	0.105008	0.028292	0.069343	0.0656994	0.0531619	0.0930558	0.0268454	0.0311039	0.019833	0.0525728	0.0664583	0.0214995	0.0111377	0.0179459	0.0476467	0.0282248	0.058717	0.122945	0.106807	0.0710724	0.168736	0.0320483	0.0500889	0.0198446	0.0144874	0.0211863	0.0157284	0.0973481	0.051661	0.0609685	0.10176	0.055735	0.0346944	0.104445	0.0661225	0.0385591
ENSG00000116985	0.0515519	0.0623343	0.0789386	0.0182503	0.0705517	0.0388513	0.0514237	0.0306855	0.0302483	0.142345	0.5857	0.013962	0.0311685	0.060353	0.0117017	0.0214484	0.045464	0.0225308	0.0595537	0.0416788	0.0608071	0.0511909	0.0377609	0.0305341	0.0251058	NA	0.102959	NA	0.00609366	0.068972	0.0398464	0.0532004	0.0852936	0.0601991	0.0772156	0.0914819	0.0616435	0.0332453	0.0521783	0.0293495	0.0895575	0.0427444	0.0924338	0.0296492	0.149069	0.0387663	0.0221736	0.0266561	0.0501964
ENSG00000043514	0.0110041	0.0155292	0.0105828	0.0119466	0.00359665	0.00357775	0.00945918	0.00653356	0.0140324	0.0112272	0.0109039	0.0132575	0.0066465	0.00819516	0.00928922	0.00379839	0.00959567	0.0112485	0.0065695	0.00974185	0.00343789	0.00555777	0.00317012	0.00917458	0.00982259	0.00899258	0.0152071	0.0110478	0.00792817	0.0080597	0.00711513	0.00654044	0.00721746	0.028567	0.0084594	0.00697076	0.0102885	0.00454425	0.00466283	0.00792758	0.00880318	0.00906719	0.0309195	0.0105313	0.00502495	0.00422296	0.00407576	0.00778499	0.011601
ENSG00000131236	0.0056231	0.00377523	0.000899372	0.00767135	0.00316802	0.00192182	0.00832572	0.00562709	0.00306075	0.00277308	0.00795498	0.0048604	0.00334551	0.0126263	0.0110393	0.00619327	0.00537937	0.00354917	0.00384124	0.00726078	0.00437907	0.00222627	0.00295774	0.00421234	0.0029358	0.00754974	0.00527605	0.00298585	0.00518109	0.00272608	0.00616604	0.00488036	0.00439298	0.00628202	0.00103648	0.00575288	0.00561482	0.00230605	0.00191911	0.00599128	0.0052802	0.00554005	0.0091222	0.00460992	0.00330704	0.00116739	0.00706425	0.00528238	0.00437968
ENSG00000131238	0.0281992	0.0323823	0.0276715	0.0323367	0.0251817	0.029358	0.0300922	0.0392782	0.0391973	0.0332729	0.0550036	0.0302935	0.0470484	0.0332397	0.0401021	0.0331028	0.03668	0.0280272	0.0308026	0.0268058	0.0221412	0.0274791	0.0456052	0.0376439	0.0366813	0.0566441	0.0313622	0.0517047	0.0311356	0.0347996	0.0433044	0.0313629	0.0348019	0.12416	0.0547808	0.0305065	0.0255964	0.022366	0.0249609	0.0280854	0.0585267	0.0542974	0.0279556	0.0385104	0.0273219	0.0275795	0.0506658	0.0450528	0.0338317
ENSG00000117000	0.00468819	0.00711338	0.0034268	0.00651386	0.00185084	0.0206318	0.00151776	0.00218147	0.00434738	0.00348383	0.00143038	0.00765615	0.00393952	0.00280054	0.00235665	0.0086372	0.00548326	0.00661229	0.00372376	0.00447427	0.00272658	0.00451765	0.0182456	0.00555069	0.012299	0.0013827	0.0116545	0.00478795	0.00451623	0.00741171	0.00512156	0.00380845	0.00566314	0.0040702	0.00453303	0.00549768	0.00207879	0.0015295	0.000151052	0.0111427	0.0237004	0.00775555	0.0131154	0.00448786	0.00510644	0.0136253	0.00128307	0.00436779	2.54197e-05
ENSG00000259943	0.0249172	0.0133846	NA	0.0109829	0.00974939	0.0217953	0.0125234	0.00924237	0.0269824	0.0144586	0.0161582	NA	0.0421934	0.0134587	0.00938993	0.0279759	0.0435121	0.00879203	0.01686	0.0153249	0.0201799	0.0122189	0.0115219	0.0131061	0.0137602	0.0173245	0.0150795	NA	0.0153045	0.0207866	0.0370989	0.0186743	0.0160435	NA	0.0235739	0.0266075	0.0180238	0.00850203	0.0158831	0.00933197	0.0133913	0.0275108	0.0151526	0.0187151	0.0196739	0.0194603	0.00191779	0.033667	0.00658979
ENSG00000084073	0.00629805	0.00954022	2.54197e-05	0.00986627	0.00015464	0.0161421	0.00248854	0.00753332	0.00655063	0.0101359	0.00641225	0.00546168	0.00987421	0.00561037	0.00674584	0.00375768	0.0055994	0.00855579	0.0105999	0.00539257	0.0131204	0.0060011	0.0140446	0.0117598	0.00851987	0.00696911	0.00989322	0.00940111	0.00807769	0.00924169	0.0123078	0.00620504	0.0074901	0.0106317	0.0105228	0.00726152	0.00751769	0.00416468	0.00379117	0.00186544	0.00865429	0.0086672	0.0108927	0.00966446	0.0063595	0.00445354	0.00212901	0.00471646	0.00829348
ENSG00000049089	0.0805149	0.0258551	0.00114847	0.00548483	0.0123274	0.00547265	0.00371906	0.0654798	0.0486615	0.0597014	0.0187932	0.0737786	0.0210463	0.00828114	0.00861829	0.00827454	0.0348129	0.0331268	0.0391041	0.00663251	0.00598738	0.00495228	0.00449745	0.0157466	0.0170571	NA	NA	NA	0.0227301	0.0158156	0.0273831	0.021212	0.00988195	0.0377432	0.0259152	0.0702471	0.00752769	0.00844255	0.00703236	0.00664526	0.00511406	0.0664539	0.00999702	0.0431142	0.0598678	0.00553572	0.0197784	0.0334305	0.0446922
ENSG00000084070	0.0105978	0.00615767	0.0040763	0.00400472	0.00399987	0.00658424	0.0133067	0.0060072	0.0107998	0.00778622	0.00320477	0.000367417	0.00508151	0.00604188	0.00803074	0.00956142	0.00450679	0.009014	0.0103272	0.0152959	0.0121783	0.00328206	0.0163625	0.00660116	0.021375	0.00123986	0.007167	0.0101183	0.00967672	0.0107254	0.00785937	0.00580964	0.00934138	0.00347437	0.00980586	0.00853848	0.00612061	0.00928846	0.00228027	0.00792035	0.00553419	0.00858743	0.00648979	0.0051365	0.0131858	0.00451415	0.00559622	0.00785716	0.00825521
ENSG00000187815	0.068021	0.0283547	NA	0.0441381	0.0410221	0.0376949	0.0455832	0.00927366	0.0304748	NA	0.0152664	0.0224989	NA	0.0531952	0.0148222	0.0397459	0.0457934	0.0320869	0.0246415	0.0272899	0.0732283	0.0494826	0.0389768	0.015858	0.0522242	0.0182874	NA	NA	0.0415058	0.0330445	0.109875	0.0442666	0.0497726	NA	NA	0.0434655	0.0550188	0.0385621	0.115738	0.0215641	0.0319919	0.0645239	NA	0.0491432	0.026101	0.0491835	0.00646874	0.0188086	0.0187044
ENSG00000238287	0.0744192	NA	NA	0.00698436	0.0236374	NA	0.0322093	0.0268404	0.0348568	NA	0.014517	NA	NA	0.0712553	0.00926093	NA	NA	NA	NA	0.0136345	NA	0.0712257	NA	NA	NA	0.0115354	NA	NA	NA	0.0137333	NA	0.02528	0.0682385	NA	NA	NA	NA	0.0125698	NA	0.023967	0.0576907	NA	NA	0.0286822	0.0574063	0.0213675	NA	NA	0.0220165
ENSG00000164002	0.0220869	0.010077	NA	NA	0.00551669	0.0393605	0.01396	0.02198	0.0167702	0.0229491	0.00735403	0.0113978	0.023383	0.0108766	0.00308159	0.0197045	0.0222152	0.0269736	0.0204853	0.0170442	0.0184849	0.021972	NA	0.0100856	0.0189409	0.00752707	0.0177882	0.0368804	0.0410592	0.0189018	0.019764	0.0154122	0.0264712	0.0672316	0.0131115	0.0313271	0.0391563	0.015216	0.0205579	0.0333475	NA	0.0144127	0.0100348	0.0210649	0.0190466	0.0276908	0.0182681	0.0169964	0.0204055
ENSG00000117010	0.0236811	0.0197205	NA	0.0501146	2.54197e-05	0.0619006	0.00713462	0.0177904	0.00951604	0.0430262	0.0123925	0.0168736	0.019243	0.00642296	0.00515368	0.0213511	0.0153593	0.0158632	0.0216523	0.0197789	0.0171593	0.0279883	0.0495969	0.0059862	0.0218258	0.01136	0.0580848	0.00781932	0.0146376	0.0120394	0.0284556	0.00860463	0.0120117	NA	0.0123976	0.0111093	0.0141604	0.015326	0.0140789	0.00496318	0.00471043	0.0232011	0.00929647	0.042697	2.54197e-05	0.00989626	2.54197e-05	0.0250376	0.0179233
ENSG00000117016	0.0418699	0.00291844	2.54197e-05	0.00216831	0.0031929	0.011045	0.00569072	0.00221812	0.00700768	0.0204994	0.0604072	NA	0.0215196	0.0137892	0.0315897	0.00790232	0.029223	0.00120223	0.0249465	0.00300007	0.00219535	0.00106277	2.54197e-05	0.0118442	0.00604964	NA	NA	NA	0.0155528	0.0076888	0.0183564	0.0163812	0.0398093	NA	0.0133747	0.00311202	0.0022883	0.00323808	0.00152009	0.00583809	0.00739534	0.0148566	0.00439428	0.0117207	0.0201686	0.051996	0.00547501	0.00132032	0.000375709
ENSG00000272145	0.0529652	NA	NA	NA	0.0437952	NA	NA	0.0111369	0.0221202	NA	NA	NA	0.127665	0.0331422	0.0246456	NA	NA	NA	0.0236352	NA	NA	NA	NA	0.0231805	0.0325041	0.0137132	NA	NA	0.0451889	0.0210371	0.0713506	0.0259166	0.0331722	0.296839	NA	NA	NA	0.0326442	NA	NA	NA	0.0543049	NA	NA	0.0156827	0.0253694	0.00642312	0.0597569	2.54197e-05
ENSG00000066136	0.0062526	0.00456761	2.54197e-05	0.00927713	0.00267509	0.0052282	0.0138739	0.00266246	0.00336902	0.0025477	0.00292543	0.00642781	0.00334866	0.0039116	0.00157549	0.00252599	0.00358311	0.00559696	0.00649156	0.00165117	0.00164912	0.0108226	0.00364658	0.00337898	0.00458614	0.00355407	0.00471771	0.00372032	0.00473919	0.00413951	0.00392527	0.0028982	0.00279075	0.00499989	0.00625899	0.00302723	0.00551051	0.00378323	0.00577287	0.00327637	0.0131709	0.00162731	0.00120072	0.00581562	0.00213052	0.00473282	0.00162592	0.00542429	0.00221865
ENSG00000117013	0.0188176	0.00683683	0.00935675	0.0193893	0.01351	NA	0.0164186	0.00450414	0.00555431	0.0190016	0.107597	0.0360344	0.0145037	0.0126247	0.0117189	0.00534043	0.0141505	0.00925329	0.0124963	0.0182341	0.00805765	0.0178388	0.090656	0.00539894	0.00502548	NA	0.0216206	NA	0.0306502	0.0114415	0.0241438	NA	0.0206629	NA	NA	0.00663915	0.0220516	0.00833473	0.0064155	0.012102	0.320385	0.0109657	NA	0.020342	0.0402803	0.00181049	0.0061312	0.00639725	0.0131723
ENSG00000179862	0.0159381	0.00747524	NA	0.0152184	2.54197e-05	0.00897601	0.000295633	0.00239811	0.00852522	0.00890095	NA	0.0182706	0.00561468	0.00745499	0.0073192	0.00299294	0.0217175	0.00197115	0.0139567	0.00307779	2.54197e-05	0.00204702	0.00502458	0.00237628	0.00150728	0.0459083	0.00553642	0.00446585	0.0189242	0.0118336	0.00574887	0.0244407	0.0118	0.0377752	0.00914994	0.00277162	0.00428524	0.0101184	0.00600619	0.00141603	2.54197e-05	0.0316904	0.0109906	0.0389161	0.00845727	0.000103607	0.0213843	0.00779758	0.00503586
ENSG00000171793	0.017973	0.012339	0.00405981	0.0651699	0.0104691	0.0209878	0.0100717	0.0103066	0.0122616	0.0200048	0.00443407	0.0114374	0.00273334	0.0121195	0.0112825	0.00348261	0.0181812	0.0145859	0.00954892	0.00888196	0.0240794	0.00515794	0.00307492	0.00726154	0.015028	0.00444432	0.00911587	0.00924975	0.0145815	0.0112104	0.0226325	0.017777	0.0109856	0.0477227	0.0129794	0.0175948	0.0147024	0.0147199	0.00541587	0.0131536	0.0284584	0.00663143	0.00106481	0.0141747	0.00604738	0.00292575	0.00958185	0.0110997	0.00737383
ENSG00000281207	0.00545669	0.0036639	0.00091568	0.00376415	0.00188353	0.0103053	0.00417916	0.00292847	0.00272452	0.00371821	0.0101568	0.00624791	0.00493863	0.00536513	0.00413919	0.0024965	0.00299409	0.00479271	0.00467661	0.00163215	0.00317602	0.00441198	0.000733665	0.00364431	0.00375231	0.00317967	0.00147892	0.005952	0.00487775	0.00400975	0.00421343	0.0047634	0.00659947	0.0202633	0.00620686	0.00358837	0.00166824	0.00501135	0.00302505	0.00311954	0.00265953	0.00352987	0.00192329	0.00416466	0.00351397	0.00487505	0.00716428	0.00262649	0.00384587
ENSG00000010803	0.00481085	0.00188387	0.00128216	0.00116839	0.00154589	0.0168368	0.00156294	0.00263938	0.00241394	0.003847	0.0116387	0.00510331	0.00367772	0.0047299	0.00144888	0.00291332	0.00301789	0.00373578	0.00501614	0.00262496	0.00457808	0.00571679	0.00203982	0.00298092	0.00333523	0.00412226	0.00197181	0.00592657	0.00427156	0.00347065	0.00310576	0.00388689	0.00536492	0.0164218	0.005166	0.00251521	0.00171754	0.00356618	0.00260243	0.00376827	0.00423508	0.00346364	0.00186318	0.00407282	0.00469597	0.00432881	0.00585969	0.00354793	0.00317331
ENSG00000127124	0.0147228	0.0142204	2.54197e-05	0.00677853	0.00549439	0.00291893	0.01005	0.0109035	0.0108116	0.00469395	0.00343616	0.0106114	0.00595664	0.0139384	0.00476277	0.0154079	0.00726984	0.00294536	0.0109161	0.00894566	0.00573406	0.00263459	0.00979742	0.00818019	0.00443551	0.0282308	0.0106821	0.0263151	0.0102265	0.0106183	0.00750119	0.00507626	0.00899484	0.0205888	0.0059325	0.0191474	0.00152533	0.00537119	0.00229665	0.00490873	0.00673741	0.0161281	0.0122023	0.00899553	0.0131793	0.00590536	0.0081355	0.0128444	0.00453612
ENSG00000198815	0.00246465	0.00420385	0.00912722	0.01157	0.000707412	0.00240984	0.00802843	0.00474285	0.0038305	0.00365068	0.00107422	0.00413728	0.00313416	0.00235588	0.00360787	0.000818066	0.00197335	0.00201853	0.00382967	0.00158646	0.00723943	0.00643411	0.00700646	0.00456865	0.00229609	0.00195277	0.00566283	0.00181645	0.00340849	0.00265306	0.00269529	0.00306244	0.00188796	0.0215614	0.00153331	0.00245426	0.0136969	0.00161347	0.00269101	0.00394554	0.00661217	0.0022936	0.00110641	0.00390483	2.54197e-05	0.00448152	0.00100807	0.00389647	0.00399949
ENSG00000127125	0.00268495	0.00220855	0.000442507	0.00837505	0.000451726	0.00561007	0.00464729	0.00355621	0.000573922	0.00197668	0.00324759	0.00158232	0.00362096	2.54197e-05	0.00189321	0.00175781	0.00281273	0.00224032	0.00135783	0.00330694	0.000577566	0.00326968	0.0068365	0.00120294	0.000369783	0.00165281	0.00401855	0.00194984	0.00368371	0.00506225	0.00269066	0.00285677	0.00314883	0.00656551	0.000496572	0.00151682	0.000481032	0.00815181	0.00010535	0.0037114	0.00155863	0.00081527	0.00262671	0.00220038	0.00187258	0.000902834	0.00136925	0.00309086	0.000486302
ENSG00000186409	0.0178092	0.0242849	0.0137328	0.0124771	0.00020027	0.0163892	0.0162046	0.0162307	0.00700892	0.00441028	0.0391302	0.0131001	0.0178014	0.00120218	0.00270208	0.00655935	0.00720462	0.0324558	0.0158845	0.00437961	0.00779109	0.00577332	0.00718516	0.00694962	0.0174667	0.00975127	0.0338702	0.0104016	0.0126637	0.00711633	0.0104839	0.0160927	0.0057079	0.0403727	2.54197e-05	0.046762	0.00775936	0.00377863	0.00410912	0.0055931	0.0203941	0.00773617	0.00853346	0.00792294	0.00664752	0.00318067	2.54197e-05	0.00689377	0.00312084
ENSG00000171960	0.00707765	0.00901664	2.54197e-05	0.0141185	0.00186382	0.0636093	0.00259899	0.00608404	0.0117795	0.0162115	0.00545462	0.0088905	0.00746905	0.00620502	0.121062	0.00494596	0.0153055	0.00669242	0.0115185	0.01082	0.0154361	0.0138577	0.0167607	0.00538305	0.00413442	0.00703631	0.00770752	0.0146709	0.00558958	0.00357247	0.00777984	0.00571845	0.00362021	0.0137055	0.00708677	0.00894907	0.0165187	0.00429225	0.0113118	0.00910058	0.0137543	0.00615745	0.00742266	0.00879223	0.00380753	0.00777197	2.54197e-05	0.00660084	0.00439203
ENSG00000065978	0.00910618	0.00645798	NA	NA	0.00847864	NA	0.000461404	0.00098313	0.00206698	0.00487484	0.00210222	0.0069493	0.0071587	0.00106318	0.00243776	0.00832445	0.00609735	0.00333888	0.0113796	0.00195723	0.0378714	NA	NA	0.00389758	0.00804296	0.00420755	0.00594831	0.00132249	0.0296093	0.0114315	0.0108886	0.00273154	0.00475116	0.00591973	0.00706538	0.00995568	0.00745538	0.00771724	NA	0.0130907	NA	0.00817821	0.0136146	0.00591351	0.00218874	0.00887197	0.00712783	0.00287611	0.00142086
ENSG00000164007	0.0264216	NA	NA	NA	NA	NA	NA	NA	NA	NA	NA	NA	NA	NA	NA	NA	NA	0.00791715	0.064583	NA	NA	NA	NA	NA	NA	NA	NA	NA	0.013806	NA	NA	NA	NA	NA	NA	NA	NA	NA	NA	NA	NA	NA	0.00927405	NA	NA	NA	NA	NA	NA
ENSG00000117385	0.00548218	0.00581578	0.00584316	0.0127704	0.00626975	0.0120477	0.00751361	0.00510519	0.00398136	0.00395701	0.00489927	0.0116288	0.00393661	0.00297212	0.00218403	0.00964758	0.00351809	0.00242956	0.00419631	0.0107636	0.00540396	0.00240208	0.00479195	0.00399061	0.00320572	0.00127525	0.00698963	0.0070344	0.00422279	0.00615017	0.00837382	0.0156078	0.00453575	0.0171812	0.00401759	0.00344522	0.000341181	0.000674157	0.00401878	0.00612783	0.0121858	0.013544	0.00873587	0.0062173	0.00463142	0.0054465	0.00547766	0.00543067	0.00703907
ENSG00000164008	0.04282	0.0217561	NA	0.00106181	2.54197e-05	0.0205674	0.0219785	0.0355169	0.0417346	0.0583543	0.00839655	0.0290589	0.0148925	0.0118897	0.049824	NA	0.053514	0.1551	0.0121515	2.54197e-05	0.0166236	0.0601936	NA	0.0107278	0.00767576	2.54197e-05	0.0671514	0.022575	0.0363713	0.0529808	0.0238916	0.00947018	0.0925046	0.0353531	0.00580407	0.0121119	0.0310687	0.00495779	0.0308591	0.0241797	NA	0.0372596	NA	0.0134912	NA	0.0290558	0.00632629	0.0286191	NA
ENSG00000274386	0.0205369	0.0281116	NA	0.0207844	0.00685407	0.0341765	0.0379378	0.0294811	0.0160628	0.0290698	NA	NA	0.016646	0.010366	0.0111816	0.0114375	0.00492436	0.0111549	0.0239988	0.0373682	0.0246174	0.00954296	0.015043	0.0234691	0.0232986	0.00454181	0.0469822	NA	0.0155254	0.0352518	0.0305139	0.0233304	0.0100182	0.0668918	0.0111608	0.0207154	0.0188383	0.00991712	0.0410354	0.0149067	0.0171771	0.0199544	NA	0.0247351	0.00885016	0.0168671	NA	0.0180095	0.00967848
ENSG00000177868	0.034054	0.0397287	NA	NA	0.0253354	0.0606357	0.0867841	0.0278665	0.0212537	0.103055	NA	NA	0.0381982	NA	0.0379855	2.54197e-05	0.00631403	NA	0.0304696	0.0314105	0.0479555	0.0396147	NA	0.0290689	0.0644918	0.00624744	0.0376671	NA	0.0307083	0.0648643	0.0740862	NA	2.54197e-05	0.0895813	0.00233333	0.0699875	NA	0.0224493	0.0306285	0.0417511	NA	0.0373955	NA	0.0557676	NA	0.00844575	NA	0.0828697	NA
ENSG00000164010	0.0334281	0.0298928	0.000102651	0.0218152	NA	0.033565	0.0201781	0.0175809	0.0120818	0.0265727	0.00515228	0.0209185	0.0211833	0.0157034	2.54197e-05	0.0172117	0.0197628	0.0304519	0.0239735	0.0362615	0.024511	0.0375696	0.0261281	0.0103819	0.0196648	0.0106136	0.0147183	0.0196315	0.0153711	0.0198514	0.023561	0.0113494	0.0112575	0.0454531	0.0122894	0.0288686	0.0344481	NA	0.0376757	0.0274808	0.0209971	0.011848	0.0350109	0.0172076	0.0165706	0.0239003	0.00874948	0.0162944	0.0177692
ENSG00000228192	0.292789	0.216191	NA	NA	NA	NA	NA	0.17387	0.194967	0.0939481	0.00725654	0.101313	0.174078	0.154759	0.0336743	0.153315	0.146872	0.185996	0.174589	0.216365	0.189233	NA	NA	0.157567	0.203552	0.162652	NA	0.101221	0.125185	0.131942	0.174008	0.0865235	0.0988095	0.163163	0.124644	0.291719	NA	NA	NA	0.17451	0.245948	0.146349	NA	0.160273	NA	0.120604	0.12868	0.131185	0.105743
ENSG00000164011	0.0333665	0.0165678	NA	0.00235572	0.0484381	0.0188743	0.00695772	0.0121941	0.00265691	0.00878981	2.54197e-05	0.00970925	0.0335527	0.00920591	0.00248066	0.0219201	0.015292	0.00921434	0.00600101	0.0239609	0.0293678	0.00208786	0.021639	0.00923314	0.00449555	2.54197e-05	0.0212688	0.00840681	0.00977134	0.000704577	0.0103312	0.00886656	0.0106295	0.0451925	0.0112611	0.00892039	2.54197e-05	0.0164299	0.0383273	0.00959428	2.54197e-05	0.00550229	0.0131529	0.0116726	0.00561063	0.00113758	0.00194864	0.00278762	0.00656967
ENSG00000117394	0.00807649	0.0040023	0.00898689	0.00200531	0.00360432	0.00275478	0.00241727	0.00134129	0.00349345	0.0115384	0.0094037	0.0571771	0.0110425	0.00549332	0.00294583	0.00972218	0.00789599	0.00633734	0.00590718	0.00184477	0.00256649	0.00236266	0.0028947	0.00508539	0.00320821	0.00355613	0.0308869	0.0107364	0.00227063	0.00336911	0.0114997	0.00430031	0.00824665	0.00688994	0.00852254	0.00638846	0.00189924	0.00130307	0.00205992	0.00201908	0.00452409	0.00343733	0.00830586	0.0106028	0.00312618	0.00418983	0.0033761	0.00272684	0.00548444
ENSG00000117395	0.00807889	0.00136957	0.000381695	0.00216554	0.00149309	0.00259277	0.00158404	0.000594874	0.00164324	0.00258145	0.00235574	0.000864447	0.0476156	0.00154153	0.000709323	0.00303504	0.00213367	0.00285378	0.00263739	0.00346503	0.00086765	0.000434917	0.00333725	0.00192643	0.00229508	0.00157715	0.00241538	0.00689678	0.00265534	0.0102776	0.0281108	0.002432	0.00231558	0.00963718	0.0032268	0.00146061	0.000355258	0.00204045	0.00257286	0.00218259	0.00166329	0.0018674	0.0284036	0.108989	0.00293734	0.0024363	0.00107969	0.00285349	0.00128898
ENSG00000243710	0.421994	0.893867	NA	2.54197e-05	NA	0.00442243	NA	NA	NA	0.0857539	0.0545999	0.0286204	0.237211	NA	0.00402352	NA	0.116321	0.607254	0.148516	0.0421474	NA	0.00342927	NA	NA	NA	NA	0.106175	0.0208524	0.246759	0.0461697	0.26099	NA	0.0187202	NA	NA	NA	NA	NA	NA	0.0104863	NA	NA	0.071416	0.0506321	NA	0.0275566	NA	0.103216	NA
ENSG00000066056	0.0168311	0.0124077	0.0137753	0.0180931	0.0340332	0.015206	0.0171464	0.0190429	0.0107815	0.00503387	0.300532	0.0218208	0.0140195	0.00533997	0.00141434	0.00872634	0.0129467	0.00818257	0.01429	0.0181177	0.0195757	0.0137203	0.0209443	0.0077068	0.0108623	NA	0.0107124	0.00459013	0.00986887	0.00725233	0.0165391	0.00189521	0.0120908	NA	0.00373043	0.0148953	0.023394	0.0153293	0.0264314	0.0227777	0.0113479	0.0110082	0.00804999	0.00832093	0.00664308	0.0145129	0.0141535	0.00755106	0.0069686
ENSG00000066322	0.00844602	0.00958812	NA	0.0214838	0.0103758	0.0133033	0.00458789	0.0295569	0.0135798	0.00453664	2.54197e-05	0.000271323	0.0153981	0.00579537	0.0145522	0.0210565	0.00226726	0.00367165	0.0244074	0.0124712	0.0114896	0.0110836	0.012018	0.00686244	0.0164916	0.00105769	0.00988899	0.0129277	0.0159575	0.00607272	0.0124826	0.0291411	0.00598213	0.00607168	0.0400431	0.00658889	0.00624957	0.0129904	0.00367073	0.0318718	0.00640417	0.00710324	NA	0.0192789	0.025822	0.0158151	0.00697209	0.00952582	0.00209586
ENSG00000159479	0.023778	0.0116014	0.016449	0.0093808	0.00414221	0.0106845	0.00383738	0.0109869	0.00944762	0.0110867	0.0146249	0.0146053	0.0124883	0.00936861	0.0108334	0.0162041	0.0163101	0.00905764	0.0238653	0.0184607	0.00806017	0.00715223	0.00331157	0.0155284	0.0104152	0.00841233	0.0158474	0.0136309	0.0251716	0.0139066	0.0149114	0.0114742	0.0149714	0.0258612	0.0132084	0.0158171	0.00629078	0.00858616	0.00644102	0.011683	0.00708067	0.00814835	0.00160533	0.0182791	0.0183364	0.0121927	0.0132138	0.0122698	0.00879509
ENSG00000229431	0.00578648	0.00505861	NA	0.00431727	0.00582483	0.013957	0.00434212	2.54197e-05	2.54197e-05	0.0131355	0.0062875	0.00451688	0.00460315	0.00677358	0.00265892	0.0157001	0.00655597	0.0019946	0.00517938	0.00585587	2.54197e-05	2.54197e-05	0.00150614	0.00787931	0.0028485	0.00113619	0.00857797	0.0091686	0.0110734	0.00492014	0.00993726	2.54197e-05	0.00373704	0.0174954	2.54197e-05	0.00920999	0.0041121	0.00287957	0.00126122	0.0126189	0.00246866	5.70946e-05	2.54197e-05	0.00689882	0.00212185	2.54197e-05	0.00542812	0.0004032	0.00139195
ENSG00000198198	0.00831832	0.00482245	0.00196709	0.00991763	0.00466766	0.00734974	0.00763177	0.00693605	0.00658327	0.00832034	0.00957206	0.00904923	0.00794096	0.00435579	0.00266318	0.00403126	0.00574472	0.00704845	0.00752162	0.00881444	0.00792084	0.0066681	0.0084404	0.00693061	0.00648595	0.00601327	0.0092918	0.00787857	0.00627833	0.00648407	0.00658521	0.00513438	0.00535105	0.00942232	0.00629061	0.00816097	0.00814167	0.00589247	0.00666389	0.00670619	0.00737723	0.0076189	0.0110147	0.00702453	0.00774552	0.00536367	0.00489122	0.00732042	0.00825408
ENSG00000142949	0.00199414	0.00691925	0.00248987	0.00120302	0.00344648	0.00209986	0.000761862	0.0013172	0.00395484	0.00992603	0.103094	0.00325362	0.00228041	0.00175371	0.000980965	0.00347871	0.00140972	0.00815406	0.00255117	2.54197e-05	0.000207584	0.00207142	0.00242511	0.00150115	0.00285179	0.0020793	0.0260919	0.00682495	0.00270855	0.00176922	0.00247875	0.022533	0.00144522	0.0394149	0.0356599	0.0108727	0.00102197	0.00211173	0.000766952	0.00151064	0.00220711	0.00248734	0.00219582	0.00218922	0.00354543	0.00208656	0.00163885	0.00160515	0.00190103
ENSG00000066135	0.0185642	0.0132691	NA	0.0234081	0.00565743	0.0259357	0.0135907	0.00330837	0.00932476	0.0222891	0.00239635	0.0156052	0.00788817	0.00444846	0.00295497	0.00792789	0.0134109	0.00795773	0.00874587	0.00166319	0.00815575	0.0169365	0.0291004	0.00564496	0.00999358	0.00278633	0.0274187	0.0108613	0.00850517	0.00776688	0.00581953	0.0139335	0.00926499	0.0276455	0.00782576	0.016349	0.010716	2.54197e-05	0.00826359	0.000427977	0.00868448	0.00773785	0.0193395	0.00493942	0.00331371	0.00405284	0.00188512	0.00455916	0.00161923
ENSG00000236200	0.0297319	0.00978748	NA	NA	0.0100039	0.0560387	NA	2.54197e-05	0.0325344	0.0345381	2.54197e-05	2.54197e-05	0.024123	0.0183319	0.0524197	0.000723989	0.0189121	0.00242043	0.0708433	NA	0.00660021	NA	NA	0.0027058	0.0126188	0.0236408	NA	0.015002	0.025622	0.0997211	0.0298891	0.0378424	0.0159465	0.0397059	0.0258134	0.00382017	NA	0.0133517	2.54197e-05	NA	0.00118297	0.0195833	NA	0.0207255	0.02483	0.0165915	0.005583	0.0281264	0.0184957
ENSG00000126091	0.00555022	0.00408761	0.00187449	0.00124468	0.00609942	0.0016625	0.000739518	0.00216705	0.00371619	0.00722298	0.00575465	0.0104768	0.0142136	0.00630892	0.00489724	0.0261292	0.00869293	0.000664134	0.0071538	0.00152205	0.0022674	0.00180423	0.00536025	0.00526025	0.0040708	0.00487169	0.00532497	0.0104049	0.00635862	0.00826896	0.0142147	0.0065692	0.0112585	0.0344727	0.00807091	0.00432927	0.000186186	0.0030962	0.00144348	0.00294854	0.00605152	0.0148646	0.0133713	0.0120673	0.00507403	0.00242439	0.0121039	0.0559348	0.00523015
ENSG00000117407	0.0804746	NA	NA	NA	0.0663085	NA	NA	0.0296859	0.050787	0.0879933	0.138708	NA	NA	0.036753	0.0263288	0.0494348	0.0481243	0.0770591	0.0628719	NA	NA	NA	NA	0.0275684	0.0400365	NA	NA	NA	0.0623779	0.0205177	NA	NA	0.0423524	NA	NA	0.0676799	NA	0.0730049	NA	NA	NA	0.0406918	0.0694935	0.0281385	0.0439701	0.0189301	NA	0.0535976	0.0544891
ENSG00000117408	0.00587014	0.00464646	2.54197e-05	0.00483816	0.00317649	0.00560385	0.000822745	2.54197e-05	0.00463711	0.00503919	0.00254864	0.00863939	0.00568292	0.00550579	0.00140895	0.00590246	0.00661209	0.00412435	0.00668215	0.00285961	0.00230219	0.00336035	0.00279789	0.00275752	0.00277697	0.0015264	0.0075948	0.00835768	0.0066133	0.0104222	0.00820352	8.59984e-05	0.00361959	0.0360238	0.00266679	0.00661474	0.00362208	0.00047026	0.00130352	0.00227139	0.00233909	0.00323121	0.00848617	0.00766661	0.00254751	0.00151756	0.0052624	0.00380069	0.000962364
ENSG00000132768	0.00728581	0.012025	2.54197e-05	0.006105	0.000134107	0.00074733	0.00255146	0.00951301	0.0105197	0.0053345	0.00204514	0.0108864	0.00383843	0.00604944	0.00294702	0.00915996	0.00497992	0.00728707	0.00484696	0.00948982	0.00348611	0.00237882	0.0215526	0.00428869	0.00270722	0.0019387	0.00366392	0.00429291	0.00675813	0.00317421	0.00790051	0.000313941	0.00743357	0.0164489	0.00614839	0.00863024	0.00609001	0.00140264	0.00551092	2.54197e-05	0.00961711	0.00140636	2.54197e-05	0.00406131	0.0110395	0.00448452	0.013305	0.0036327	2.54197e-05
ENSG00000117410	0.0133491	0.0150995	0.0242407	0.0251024	0.0158652	0.0126324	0.0140076	0.0263863	0.0180893	0.0261484	0.0108779	0.0150029	0.0128949	0.0111638	0.0117091	0.0101806	0.0120528	0.0166614	0.0103931	0.0107888	0.0112922	0.0121535	0.0162527	0.0111978	0.0220835	0.0169375	0.0311372	0.0157904	0.0142928	0.0153012	0.0128515	0.00783334	0.0118381	0.00798651	0.007966	0.0191301	0.0274192	0.0113723	0.0130415	0.0131681	0.0120051	0.00898034	0.00901427	0.0085552	0.00700642	0.0103774	0.00662149	0.0132221	0.0220556
ENSG00000117411	0.00389068	0.00318834	0.000162643	0.00283671	0.00290093	0.00286125	0.00326253	0.00239342	0.00185605	0.00524827	2.54197e-05	0.00636306	0.00255353	0.00476775	0.000210166	0.00501616	0.00367688	0.00581035	0.00534889	0.00348888	0.00201947	0.00355606	0.0047713	0.00379093	0.00347296	0.00206261	0.000308878	0.000912031	0.00390435	0.0020464	0.00339693	0.00382794	0.00509516	0.0339858	0.00620246	0.0110706	0.00100684	0.00435808	0.00448766	0.00121367	0.00741364	0.0032615	0.00894245	0.00304204	0.00210658	0.0035485	0.00411385	0.00491767	0.00118604
ENSG00000159214	0.0447812	0.0408172	NA	0.0453761	0.0220488	0.0101477	0.0293496	0.0301597	0.0378238	NA	NA	0.0426477	0.0172391	0.0172308	0.00694875	0.0150963	0.00138762	0.0368441	0.0347272	0.0246795	0.017945	0.0332023	NA	0.0316138	0.0204476	NA	NA	NA	0.0478569	0.036844	0.0206811	0.0221424	0.0458881	NA	0.0125151	0.0428879	0.0509045	0.0339743	0.0415456	0.0183947	NA	0.0562761	0.0535238	0.0148775	0.0187592	0.064715	0.039271	0.0304028	0.025376
ENSG00000196517	0.0173058	0.00988051	0.045657	2.54197e-05	0.00719538	0.00449565	0.0157996	0.00887436	0.00443552	0.0197126	0.00617471	0.0172003	0.00508616	0.00960099	0.00684425	0.00430739	0.0101375	0.00658098	0.0235132	0.00298288	0.00445348	0.0131049	0.0110038	0.00937287	0.0147386	0.0060854	0.0354752	0.0288109	0.0271784	0.0274031	0.00473762	0.0180143	0.0213489	0.0446205	0.013822	0.00503701	0.00371137	0.0183742	0.00888244	0.00369076	0.0100536	0.00695839	0.0335993	0.00837231	0.0191845	0.0463166	0.0100755	0.00980142	0.00423963
ENSG00000178028	0.00590245	0.00458769	2.54197e-05	0.00836141	0.0017233	0.00962451	0.00358103	0.00546808	0.004344	0.00669447	0.00373458	0.0038618	0.00410189	0.0031722	0.00144552	0.00345292	0.00710456	0.0071697	0.00262871	0.00968459	0.00479094	0.00366267	0.00850103	0.00374572	0.00411283	0.00185562	0.00619543	0.00330441	0.00218716	0.00380806	0.00429972	0.00409519	0.00134319	0.0162605	0.00196473	0.00511805	0.011303	0.00161437	0.00160043	0.00185793	2.54197e-05	0.00272535	0.00823973	0.00580353	0.000297581	0.00349522	0.00578985	0.00293567	0.000485471
ENSG00000117419	0.00550297	0.00414291	0.0257141	0.0238217	0.00975439	0.00900424	0.0197188	0.0138072	0.00711742	0.00633373	0.00353754	0.00425328	0.00683853	0.00943	0.00263167	0.00696076	0.0180217	0.00912224	0.00357631	0.00585624	0.0163637	0.0137312	0.0256297	0.00698019	0.00201551	0.00769878	0.0124375	0.00901462	0.0075168	0.00819427	0.00898647	0.014772	0.00704951	0.045996	0.00496635	0.00681164	0.0077121	0.00580773	0.0211945	0.00177884	0.00660818	0.00651519	2.54197e-05	0.0119491	0.00575835	0.00375917	0.00169777	0.00740942	0.00735009
ENSG00000187147	0.00345401	0.00291504	0.00120705	0.00279783	0.00202432	0.00702785	0.00745306	0.00316907	0.0049154	0.00544341	0.00201439	0.00319411	0.00148308	0.00217489	0.00229274	0.00334144	0.00413751	0.00246088	0.0026508	0.00498387	0.00305895	0.00628168	0.00883165	0.00345666	0.00478978	0.00501042	0.00143836	0.00260316	0.00293034	0.00304911	0.0022281	0.00188937	0.00324163	0.00391144	0.00547763	0.00435141	0.00332411	0.00226873	0.00441195	0.00388029	0.01265	0.00162601	0.00815197	0.00337929	0.000970113	0.00186145	0.0060758	0.00227866	0.00320256
ENSG00000126106	0.00275008	0.00250636	0.00100116	0.00186196	0.00159406	0.00561917	0.00433603	0.0029188	0.00425028	0.00454639	0.00205032	0.00317584	0.00142705	0.00182761	0.00223876	0.00269857	0.00348942	0.00178068	0.00238274	0.00276992	0.00158175	0.00328379	0.00430351	0.00323508	0.00409512	0.00432874	0.00116725	0.000875082	0.00259494	0.00278012	0.0020145	0.00219826	0.00304003	0.00384414	0.00396081	0.00382958	0.00176547	0.00196977	0.00186906	0.00231909	0.00507597	0.0015255	0.00582605	0.00296045	0.000791728	0.00103952	0.00607455	0.00207352	0.00253611
ENSG00000198520	0.159828	NA	NA	0.0587955	0.0370426	0.0163597	0.021274	NA	NA	NA	0.0784171	NA	NA	0.080354	0.00468867	NA	NA	NA	0.130661	0.0278807	0.062534	0.0183257	NA	NA	NA	NA	NA	0.0702794	0.0904279	0.0632621	NA	0.0735927	0.0961797	0.0362452	0.0345759	NA	0.0555094	0.0563145	NA	0.0263508	NA	NA	NA	0.0334061	0.0385127	0.0260755	NA	NA	NA
ENSG00000142937	0.0142678	0.0196096	0.00733007	0.0235266	0.0201944	0.0107126	0.00561943	0.0253012	0.0134132	0.0119202	0.00810991	0.0172001	0.0098205	0.0181028	0.00886876	0.0100255	0.0163947	0.0112471	0.0117251	0.00776905	0.0135556	0.0204204	0.00990276	0.0101969	0.0117635	0.0103943	0.0199868	0.0101441	0.00761099	0.0188438	0.0207173	0.0130575	0.0275569	0.00853239	0.00753453	0.0142014	0.0212641	0.02885	0.00675299	0.0105179	0.00580866	0.0139589	2.54197e-05	0.0118827	0.0273002	0.0114089	0.00947321	0.0101325	0.0152736
ENSG00000173846	0.0173091	0.0154534	0.00281817	0.0188338	NA	0.0305408	0.0133826	0.00909594	0.0156955	0.0234131	0.00999974	0.0201506	0.0165023	0.0113032	0.0158765	0.00737901	0.0142664	0.0130038	0.0123406	0.00683159	0.00913041	0.0100413	0.00215421	0.0103617	0.0103949	0.0147885	0.0226009	0.0238205	0.00995921	0.0190292	0.0110213	0.00938606	0.0104753	0.0136167	0.00943722	0.0159572	2.54197e-05	NA	0.0153774	0.0171648	0.0284621	0.0108556	0.00493094	0.0149314	0.0289898	0.0120269	0.0144682	0.00810591	0.0144937
ENSG00000222009	0.0407092	0.0251408	NA	NA	NA	NA	NA	0.0674718	0.0340856	0.0202893	NA	0.0620427	0.0637538	0.0294413	0.0267677	0.0439618	0.0246621	0.01803	0.0322114	0.0138697	NA	0.0325173	NA	0.045973	0.0373686	0.0194429	0.0279205	0.0883072	0.0321351	0.0643575	0.0448397	0.0602407	0.0351455	0.0458207	0.016873	0.0411277	NA	NA	NA	NA	NA	0.0491051	NA	0.0270622	0.0378886	0.0304216	0.0655445	0.030916	0.037344
ENSG00000117425	0.0148184	0.0224848	2.54197e-05	0.016236	0.00715899	0.0157043	0.00714158	0.00665401	0.00529763	0.0533637	NA	NA	0.00895246	0.0196426	0.00681909	0.0114969	0.0181933	0.00705535	0.0132826	0.0126059	0.00536156	0.00902477	0.0383396	0.00810092	0.0100394	NA	NA	NA	0.00394173	0.0163319	0.00855784	0.0398493	0.0127313	NA	0.00966728	0.0153158	0.00717871	0.00485901	0.0093658	0.0108231	0.0477914	0.023661	NA	0.0224562	0.00928707	0.013084	0.00861645	0.00994956	0.00200391
ENSG00000070785	0.00615226	0.00658866	0.00187088	0.00929217	0.000420601	0.021325	0.00924231	0.00510145	0.00435474	0.00377924	0.00279779	0.00436704	0.00563573	0.00722404	0.00202572	0.00268746	0.00711108	0.00524049	0.00349706	0.0068703	0.00538117	2.54197e-05	0.0237072	0.00422549	0.00319143	0.00409294	0.00595081	0.0100812	0.00520526	0.0115458	0.00651292	0.00909471	0.00719259	0.0398283	0.00546109	0.00669025	2.54197e-05	0.00911107	0.00678635	0.00260838	0.00931017	0.00888399	0.00148055	0.0115586	0.00445584	0.0094448	0.00585488	0.0048021	0.00694816
ENSG00000126107	0.00190024	0.00216189	0.00123878	0.000826662	0.000730556	0.00145235	0.00501946	0.00137492	0.00191487	0.00114119	0.00264944	0.000579761	0.00268361	0.00103951	0.00271794	0.000311701	0.00234985	0.00151839	0.000862427	0.000163554	0.000581407	0.00202712	0.00525955	0.000827563	0.00258748	0.0016463	0.000664711	0.00340594	0.0018914	0.00349438	0.00151288	0.00134561	0.0021146	0.00590968	0.00152181	0.00260038	0.00194776	0.00127915	0.000540246	0.00112427	0.0041008	0.00158469	0.00138452	0.00140161	0.00129345	0.000907422	0.00127939	0.00143976	0.00224927
ENSG00000126088	0.00795438	0.00197572	7.30516e-05	0.00071431	0.000567019	0.00565283	0.00216468	0.00658438	0.0033822	0.00512234	0.00324298	0.00514788	0.00606937	0.00305703	0.00485395	0.00416166	0.00346563	0.00346	0.0046411	0.000303149	0.000850984	0.00269515	0.00189022	0.00154307	0.00483315	0.00164394	0.00163352	0.002633	0.00558418	0.00853469	0.00717931	0.0080323	0.00263214	0.0156639	0.00118543	0.00558117	0.00400907	0.00257324	0.00140409	0.00440721	0.00964606	0.000687975	0.00285404	0.00485089	0.00429142	0.00134522	0.00772523	0.0051947	0.0061362
ENSG00000162415	0.0375193	0.0292593	2.54197e-05	0.0181785	0.0075162	0.0191121	0.0113318	0.0120698	0.0114215	0.0153101	NA	0.0187671	0.0259858	2.64192e-05	0.00562295	0.00232119	NA	0.0209983	0.0410939	0.00133044	0.00891161	0.014838	0.0180476	0.00896321	0.00828746	NA	NA	NA	0.0149513	0.0131882	0.0211824	0.015356	0.0121185	NA	0.00694378	0.0285222	0.0224014	0.00580188	0.028353	0.000846747	0.0166665	0.0123429	0.0287498	0.0205142	0.00324996	0.00604882	0.0045679	0.00268155	0.00358687
ENSG00000132781	0.0142733	0.0091569	2.54197e-05	0.00764018	0.00352501	0.00781144	0.00211557	0.00701653	0.00399402	0.016178	0.00862657	0.00826799	0.0109413	0.00245042	0.00773348	0.00067709	0.00667859	0.00289144	0.0110951	0.00533679	2.54197e-05	0.0106261	0.0174931	0.00958546	0.00912199	0.00116231	0.0149978	0.0152652	0.00582924	0.0119443	0.00826173	0.00699811	0.0082805	0.016932	0.010241	0.00548019	0.0125853	0.00141539	0.00801441	0.00700166	0.0128717	0.00832953	0.02251	0.0108706	0.00270546	0.00929986	0.00803627	0.00341241	0.000293629
ENSG00000132773	0.015645	0.0187079	NA	NA	0.0247456	NA	NA	0.0167079	0.0066993	0.00932241	2.54197e-05	NA	0.0216686	2.54197e-05	2.54197e-05	0.00264988	0.019375	2.54197e-05	0.0174612	NA	NA	NA	NA	0.021811	0.0169522	0.00183158	NA	NA	0.0265957	0.0384773	0.0240474	2.54197e-05	0.0235982	NA	0.00537519	0.0100548	NA	0.00485892	NA	NA	NA	0.0109961	NA	0.0229689	0.0144857	0.028872	2.54197e-05	0.0183874	0.0434069
ENSG00000070759	0.0102631	0.0110548	0.00818529	0.0227264	0.0115277	0.0199866	0.0119264	0.0096239	0.013331	0.0248928	0.00469627	0.0318852	0.00424892	0.00829231	0.00307837	0.005089	0.0117353	0.00823408	0.0118423	0.0197203	0.00459985	0.0254001	0.0121062	0.00192935	0.010047	NA	NA	0.0104998	0.00865553	0.00309378	0.00503688	0.00989468	0.0154993	0.00820183	0.0153753	0.00813397	0.00535448	0.00797984	0.00280338	0.0111936	0.019249	0.00684087	2.54197e-05	0.00778755	0.00655969	0.0195212	0.00700647	0.0133192	0.0121644
ENSG00000280670	0.893867	0.893867	NA	NA	0.893867	NA	NA	NA	NA	NA	0.337448	0.283644	0.893867	0.893867	0.409165	0.893867	NA	NA	0.893867	NA	NA	0.547892	NA	0.893867	0.893867	NA	NA	NA	0.893867	0.893867	0.893867	0.84193	0.893867	NA	0.893867	0.893867	NA	0.893867	NA	NA	0.485526	NA	NA	0.893867	0.723779	0.893867	0.783941	0.893867	0.811815
ENSG00000132763	0.0105086	0.00172439	2.54197e-05	0.00658806	0.00177102	0.0192466	0.00500264	0.0102896	0.00110805	0.00733301	0.00834475	0.0138349	0.00198879	0.000486385	0.0079243	0.0118769	0.0136242	0.0143927	0.0112762	0.00810121	0.00940825	0.00651065	0.0286757	0.00704685	0.0130739	0.00479081	0.0121215	0.00697679	0.0118831	0.0149374	0.00808426	0.00581713	0.0091137	0.0585895	0.00355428	0.0285906	0.0153117	0.00500217	0.00558059	0.00128797	0.0379532	0.00427017	0.0188151	0.00688007	0.000269169	0.0101612	0.00234492	0.0147439	0.00722121
ENSG00000117450	0.05625	0.0667584	NA	NA	0.0121795	NA	NA	0.0279685	0.0260092	NA	9.34193e-05	NA	0.0135199	0.0199802	0.0265928	0.0138606	0.0278602	0.118762	0.0224984	NA	NA	NA	NA	0.041768	0.0347676	0.0462502	0.0624173	NA	0.0782045	NA	0.0345405	0.0321438	0.0732773	0.0904268	0.102994	0.0747992	NA	0.0105349	NA	NA	NA	0.0275986	NA	0.0221199	NA	NA	0.00420042	0.0506891	0.0210298
ENSG00000117448	0.00600973	0.00839978	2.54197e-05	0.000336926	0.00909612	0.00444955	0.00408636	0.00414652	0.00603444	0.00397882	0.00822606	0.00702332	0.00559024	0.0101114	0.00591975	0.00785581	0.0105363	0.010758	0.00717885	0.00163323	0.0042187	0.00544331	0.00174704	0.010542	0.00514432	0.00315892	0.0104295	0.00984256	0.0125277	0.0174292	0.00775142	0.0222786	0.0155989	0.0169998	0.00842106	0.00596231	0.00802852	0.0119181	0.00209981	0.00174485	0.00664617	0.00578387	0.0115501	0.0168034	0.00810342	0.0127366	0.00862589	0.00714061	0.0135205
ENSG00000132780	0.00369521	0.00274651	0.00400867	0.0063964	0.00220529	0.00467726	0.00431239	0.00350009	0.00252839	0.00322281	0.00807692	0.0034598	0.00416521	0.00318126	0.00472709	0.00340632	0.00390996	0.00200423	0.00265669	0.00346903	0.00426197	0.00313664	0.00509274	0.00311616	0.00276986	0.0047166	0.00464799	0.00236849	0.00311376	0.0022571	0.0029442	0.00312527	0.00262733	0.00709606	0.00176481	0.00404018	0.0032553	0.00293203	0.00322958	0.00271638	0.00419183	0.00453764	0.00163784	0.00368428	0.00406795	0.00178915	0.00473892	0.00535705	0.00284439
ENSG00000159588	0.0176886	0.0372662	NA	0.0413396	0.00696745	0.0279041	NA	0.0144628	0.0228949	0.025769	NA	0.0275408	0.03757	0.0152918	0.00709779	0.00995065	0.0284823	0.0352473	0.0122456	0.016186	0.047252	0.0372286	0.0291667	0.0145163	0.00922298	NA	0.025472	0.00569317	0.0104694	0.00819561	0.0272398	0.0067371	0.00692264	0.00641281	0.0100027	0.0367042	NA	0.00725868	NA	0.0377477	0.0500049	0.0125223	0.00778289	0.00616236	2.54197e-05	0.0168379	0.0167026	0.0103065	0.00971348
ENSG00000159592	0.00255077	0.0040945	0.00150495	0.0060857	0.0027978	0.00648433	0.00263853	0.00361686	0.00324218	0.00338699	0.00423142	0.00441695	0.00302087	0.00228262	0.00154115	0.0025952	0.00317746	0.00466131	0.00362914	0.00281011	0.00355096	0.0061118	0.00225146	0.00416804	0.00278669	0.00278071	0.00330579	0.00307175	0.00402532	0.00223576	0.00291733	0.00339143	0.00409135	0.00408197	0.00218259	0.00445173	0.0049613	0.00263515	0.0032429	0.00287505	0.00305846	0.0026702	0.00378355	0.00232096	0.00177917	0.00225157	0.00315944	0.0030446	0.003363
ENSG00000159596	0.0202169	0.0146463	NA	0.00513911	0.00543217	0.03739	0.0109856	0.0205585	0.0170584	0.0241707	0.00502038	0.0387528	0.0113313	0.0299782	0.00285798	0.00568895	0.017113	0.0143829	0.0139643	0.0239864	0.0157585	0.021853	0.0516274	0.0113221	0.0118896	0.0123009	0.00201086	0.0163613	0.0197014	0.023821	0.0267406	0.00732159	0.010891	0.0144806	0.00498193	0.0275558	0.0210966	0.00975046	0.0274902	0.0312009	0.0148808	0.00878169	0.0380719	0.0129832	0.0255212	0.0100907	2.54197e-05	0.0155733	2.54197e-05
ENSG00000197429	0.013605	0.0125211	0.00961579	0.0155404	0.00577988	0.00899536	0.00810866	0.00601074	0.00931333	0.0148457	0.00882818	0.0104116	0.0100888	0.00891165	0.0024551	0.0110576	0.0107813	0.0182121	0.0128855	0.0078189	0.0042118	0.0119262	0.0194676	0.00921657	0.0105286	0.00866247	0.012828	0.00815631	0.0125893	0.00762081	0.0147467	0.00889807	0.019559	0.016856	0.00695157	0.0112687	0.00109356	0.00614178	0.00970145	0.0126918	0.0103733	0.00806714	0.00413136	0.0108898	0.0091376	0.0124711	0.00511945	0.00898153	0.00359344
ENSG00000086015	0.00408677	0.0141417	0.0032708	0.00277383	0.00192687	0.00227532	0.000846273	0.00911973	0.00575412	0.00772343	0.00126025	0.00366834	0.00327438	0.00370408	0.00168822	0.00651062	0.00503571	0.00992293	0.00390868	0.00401637	5.00482e-05	0.00285337	0.00336635	0.00432095	0.00739661	0.00617073	0.00880897	0.00776989	0.00276046	0.00341011	0.00288062	0.00208041	0.00455791	0.0164034	0.0015718	0.00928932	0.00229373	0.00101051	0.00179317	0.00251283	0.0179666	0.00278458	0.00485026	0.00407531	0.00441136	0.00705305	0.00291563	0.00658457	0.0122786
ENSG00000117461	0.0107707	0.011986	2.54197e-05	0.011972	0.00335678	0.0200672	0.012151	0.0132323	0.0107917	0.00707645	0.0201646	0.00161469	0.0213322	0.0182131	0.000853173	0.0162616	0.0101073	0.00582097	0.0104088	0.0109114	0.00765824	0.00894249	0.00284635	0.0137699	0.0110077	NA	0.00477872	NA	0.0143056	0.00867209	0.0194518	0.00863855	0.0106919	NA	0.0108567	0.0171751	0.00372971	0.00391992	0.00971333	0.0110056	0.0118303	0.0100021	0.0140126	0.00683687	0.0226052	0.0178425	0.00306329	0.0191953	0.0140121
ENSG00000085998	0.00644261	0.00399682	0.00113089	0.00666608	0.00520665	0.00725882	0.00160123	0.00605594	0.00434835	0.00638174	0.00283484	0.00451941	0.00410212	0.00229991	0.00212772	0.00450551	0.00626334	0.00476563	0.00629567	0.0060128	0.00342071	0.00286267	0.00687397	0.00282088	0.00228752	0.00192438	0.00357921	0.00369361	0.00428759	0.00544152	0.00761569	0.00586634	0.0062091	0.0193323	0.00361443	0.00876352	0.000217644	0.00727075	0.00340562	0.00633741	0.00427983	0.00285813	0.00275326	0.00466508	0.00902652	0.00478433	0.00277989	0.00276643	0.00548929
ENSG00000132128	0.00363673	0.00534002	NA	0.0174119	0.00823952	0.00624316	0.0143992	0.00412328	0.0012074	0.00286243	0.00257241	0.00240848	0.00429857	0.00677829	0.00265338	0.00416251	0.00398061	0.00490403	0.00206043	0.00321853	0.00483727	0.00272544	0.0192359	0.00317897	0.00332712	0.00144016	0.00486187	0.0087332	0.00197819	0.00319807	0.00147197	0.00184718	0.00310085	0.0049357	0.00435134	0.00236989	0.00262004	0.00658868	0.00320083	0.00150348	0.00181655	0.00534293	0.00274639	0.00485838	0.000692627	0.00306882	2.54197e-05	0.00313898	0.00215992
ENSG00000173660	0.0368224	0.0566373	NA	0.0517505	0.0451482	0.0434786	0.0485081	0.0409001	0.0343177	0.0364726	0.0277101	0.0394577	0.0328313	0.0268852	0.0318532	0.0431049	0.0395775	0.0475878	0.0411257	0.0419498	0.0305786	0.046527	0.0439467	0.0287528	0.0345326	0.0326379	0.0346109	0.0298393	0.0377357	0.0304384	0.0399956	0.021942	0.0344419	0.0226548	0.038927	0.0562202	0.0399597	0.0427597	0.0383145	0.0496223	0.0496243	0.0329675	0.0311495	0.0461274	0.0497727	0.0338405	0.0261436	0.0285892	0.0468215
ENSG00000117481	0.00389522	0.00700545	0.00579403	0.00304275	0.00493146	0.00943334	0.00552075	0.00162106	0.00407741	0.0078985	0.0165837	0.00656963	0.00451543	0.00136298	0.0108264	0.00631903	0.00645304	0.00658666	0.00682815	0.00565246	0.00552862	0.000659306	2.54197e-05	0.00329483	0.00394698	0.00421579	0.0113577	0.00778054	0.00237807	0.00310327	0.00315739	0.00382027	0.00295728	0.0428178	0.00593427	0.00511674	0.00707548	0.00530106	0.00464909	0.00534238	0.00151567	0.0045686	0.00741459	0.00627239	0.00211108	0.00292455	0.00292923	0.00666624	0.00175125
ENSG00000117480	0.0369873	0.0492576	2.54197e-05	0.00969174	0.0108903	0.0143125	0.0123775	0.0359985	0.0448752	0.0321737	NA	0.00926421	0.0320706	0.0097599	0.0112008	0.0255258	0.0440433	0.0581549	0.0191076	0.0246753	0.0172359	0.0136809	0.0208286	0.0118011	0.0458423	0.13597	0.0713388	0.0117774	0.0210672	0.00917672	0.044008	0.0949948	0.0108897	0.160434	0.0298471	0.0387687	0.0142242	0.0122206	0.0172489	0.0157364	0.0190024	0.0491415	0.0212168	0.0379201	0.0402415	0.0258501	0.00389947	0.0136833	0.0511292
ENSG00000269956	0.00484016	0.00529724	0.00384831	0.0165308	0.00311055	0.013364	0.00832782	0.00495756	0.00225572	0.00347566	0.0113754	0.00461201	0.00891641	0.00701304	0.00360939	0.00200844	0.00386386	0.00372414	0.00887695	0.0133677	0.0109413	0.010533	0.00561538	0.00461322	0.00695484	0.00541847	0.00434026	0.00666877	0.00543265	0.00501929	0.00906913	0.0158371	0.00229966	0.0297528	0.00158274	0.0107643	0.00450771	0.00575907	0.0175159	0.0102394	0.0336417	0.00657593	2.54197e-05	0.0125024	0.00398601	0.00936841	0.00153387	0.00379769	0.00355277
ENSG00000079277	0.00355905	0.0050666	0.00611834	0.0120553	0.0103101	0.00844062	0.00539981	0.00681232	0.00675896	0.00597753	0.00796669	0.00454534	0.0061028	0.00640667	0.00270068	0.00317993	0.00560738	0.00435097	0.00430895	0.00554365	0.0055793	0.00567668	0.000320205	0.00751146	0.00787281	0.00653634	0.00550652	0.00671028	0.00406825	0.00569827	0.00731427	0.0106371	0.00444605	0.0216975	0.00611164	0.00905394	0.00207563	0.0139549	0.00865975	0.00690193	0.0193354	0.00454666	0.00409368	0.015029	0.00267782	0.00418494	0.00297081	0.00636421	0.00313372
ENSG00000142961	0.00544968	0.0055554	0.00388628	0.0107064	0.00699463	0.0260279	0.014328	0.0135419	0.00724421	0.0099022	0.00705916	0.0101454	0.00865938	0.00475559	0.0129066	0.00639677	0.00413569	0.00482144	0.00763975	0.0133715	0.00947744	0.00178664	0.0172433	0.0105354	0.00867073	0.00749001	0.0180699	0.0140792	0.0148049	0.011826	0.00985582	0.00993718	0.00810644	0.0150302	0.00969155	0.00609568	0.0202603	0.0126775	0.00393339	0.0155944	0.0359129	0.00783627	0.0140811	0.00316901	0.00502859	0.00708986	0.00636869	0.00535729	0.0114864
ENSG00000123472	0.00235538	0.0048737	0.000889312	0.00766565	0.00165658	0.00672888	0.000928118	0.003687	0.0058678	0.00850747	0.00397538	0.00426098	0.00736002	0.0025235	0.000431737	0.00581814	0.00760246	0.00857261	0.00425844	0.00339439	0.0040689	0.00383916	0.00322087	0.00536822	0.00440998	0.00555374	0.0124403	0.00543579	0.00439611	0.00542461	0.0029977	0.00480909	0.00441382	0.0255351	0.00707242	0.00358075	0.00304413	0.00252843	0.00285366	0.00305518	0.00352455	0.0048386	0.00305854	0.00532485	0.000904923	0.00214405	2.54197e-05	0.00526425	0.00276469
ENSG00000228237	0.00426256	0.0052937	0.00484764	0.00655639	0.00373055	0.00654486	0.00188053	0.00463707	0.0025572	0.00614541	0.00333051	0.00679225	0.00598056	0.00488051	0.0088293	0.00579347	0.00565212	0.00457557	0.00377934	0.00528495	0.00526118	0.00580308	0.00309399	0.00720498	0.00455228	0.00260194	0.00646477	0.00959242	0.00255484	0.00549351	0.00438928	0.00448168	0.00341757	0.0066321	0.00681679	0.00473266	0.00589794	0.00782773	0.00605956	0.00387319	0.00467216	0.0154706	0.00601508	0.00487329	0.00264099	0.00524437	0.00404003	0.0074738	0.00240679
ENSG00000159658	0.00265759	0.00334139	0.00215153	0.00388461	0.00222003	0.00459583	0.00133734	0.00269982	0.00177829	0.00310017	0.00110053	0.00463129	0.00419303	0.00246943	0.00458426	0.00417141	0.00324678	0.00232947	0.00221848	0.00352294	0.00330699	0.00411293	0.00145805	0.00458344	0.00298706	0.00139072	0.0049188	0.00648871	0.00155252	0.00403736	0.00241846	0.0034491	0.00209085	0.00566752	0.00415548	0.00308914	0.00435289	0.00555901	0.00450661	0.00244759	0.00333703	0.0127854	0.00573314	0.0027196	0.00120865	0.00380352	0.00410754	0.00556403	0.00217226
ENSG00000142973	0.0623068	0.192185	0.0699584	NA	NA	NA	NA	0.102018	0.0978836	0.105201	NA	0.0697799	0.121715	0.161655	0.0670819	0.126152	0.152236	0.150119	0.0919994	NA	NA	NA	NA	0.13567	0.101842	NA	0.0707716	NA	0.0485346	0.0419532	0.0872499	NA	0.102276	0.525416	0.121301	0.108306	NA	NA	NA	NA	NA	0.155033	0.102198	0.188007	0.107173	0.0762412	0.0894145	0.14545	0.0840055
ENSG00000154198	0.0342843	0.0635652	NA	NA	NA	NA	NA	0.0622191	0.0434784	0.082343	NA	NA	0.0414479	0.0809754	NA	0.0558322	0.0387081	0.0130467	0.0310984	NA	NA	NA	NA	0.0411993	0.0511114	NA	0.0265852	NA	0.0323521	0.0273222	0.0496547	NA	0.0384951	NA	NA	0.0640748	NA	NA	NA	NA	NA	0.0455263	NA	0.0383585	NA	0.0551217	0.0330332	0.0627369	0.0605608
ENSG00000187048	0.0455236	NA	NA	NA	NA	NA	NA	NA	NA	NA	NA	NA	NA	NA	NA	NA	NA	NA	NA	NA	NA	NA	NA	NA	NA	NA	NA	0.138465	0.0363148	NA	NA	NA	NA	NA	NA	NA	NA	NA	NA	NA	NA	NA	0.287308	NA	NA	NA	NA	NA	NA
ENSG00000186377	0.018694	0.00650707	0.0280464	0.00246679	0.00471968	0.00831835	0.0122982	0.0565801	0.0427006	0.0232526	NA	0.056337	0.0237294	0.0636676	0.0184353	0.0203064	0.0254541	0.0025306	0.0206507	0.00673965	0.0138652	2.54197e-05	NA	0.0286288	0.0332158	NA	0.0421251	0.0042963	0.0147366	0.00538496	0.0172456	NA	0.0239425	NA	0.0145952	0.0133129	0.0229132	0.0103767	0.00541139	0.00532062	NA	0.019835	0.0238747	0.0241458	NA	0.0195437	0.0348282	0.0077229	0.0159361
ENSG00000186160	0.0500942	0.0591294	NA	NA	NA	NA	NA	NA	0.0787163	NA	NA	NA	0.0723729	NA	0.0149793	NA	0.0629798	0.0476995	0.0361976	NA	0.0286704	0.0211333	NA	NA	0.10158	NA	0.0408266	NA	0.049967	0.0343678	0.0788331	NA	0.0599604	NA	NA	0.0515613	0.0269164	NA	0.0599356	0.0367494	NA	0.0327041	0.020358	0.0661711	NA	0.0691777	0.0420203	NA	NA
ENSG00000225506	0.0435697	0.0288261	NA	NA	NA	0.033347	0.018797	NA	0.0608914	NA	0.148542	NA	0.0722291	NA	0.00425708	0.112475	0.0751054	0.051794	0.0383873	0.0493477	0.0246397	0.0303572	NA	NA	0.0903941	NA	0.0471183	0.464805	0.0438697	0.046969	0.0626491	NA	0.051311	NA	NA	0.0306561	0.0421753	NA	0.0634558	0.0172312	NA	0.0396626	0.893867	0.0574438	NA	0.0393704	0.078488	NA	NA
ENSG00000162365	0.179625	NA	NA	NA	NA	NA	NA	NA	NA	NA	NA	NA	NA	NA	NA	NA	0.170433	NA	0.146082	NA	NA	NA	NA	NA	NA	NA	NA	0.481047	0.134958	NA	NA	NA	NA	NA	NA	NA	NA	NA	NA	NA	NA	NA	0.893867	0.149055	NA	NA	NA	NA	NA
ENSG00000162367	0.00523045	0.0260411	NA	0.00452759	NA	0.0108006	0.00819766	0.00883453	0.00865903	0.00759441	NA	NA	0.0241089	0.0040999	0.00247135	0.00102939	0.00509154	0.00318421	0.00968803	0.00505369	0.00331665	0.00947514	0.01299	0.00271508	0.00799718	NA	0.00552416	0.0184154	0.00903132	0.0143602	0.00626311	0.000959759	0.00587873	0.0177702	0.00204365	0.00825362	2.54197e-05	NA	0.0141521	0.0101836	0.00542687	0.010772	0.0115141	0.00463656	0.0165013	0.0170742	0.00150136	0.00917453	0.00602943
ENSG00000226252	0.0761073	NA	NA	NA	NA	NA	NA	NA	NA	NA	NA	NA	NA	NA	0.0104549	NA	0.0503749	NA	0.0573101	NA	NA	NA	NA	NA	NA	NA	NA	NA	NA	NA	NA	0.074024	0.074376	0.193681	NA	NA	NA	NA	NA	NA	NA	NA	NA	0.0427435	NA	NA	NA	NA	NA
ENSG00000162368	0.00581512	0.0132091	0.00168743	0.00218156	0.00226819	0.00303364	0.000938068	0.00375986	0.00373708	0.00288983	0.00164307	0.00193947	0.00256158	0.00236652	0.00422663	0.00172516	0.00547705	0.00583368	0.00590908	0.00119374	0.00127953	0.00527346	0.00135752	0.00234134	0.00362476	0.00143308	0.00324156	0.00356068	0.00644453	0.00341735	0.00524432	0.00226203	0.00175124	0.00531902	0.00149502	0.00779644	0.00184709	0.00167368	0.00223788	0.00293506	0.0039431	0.00233286	0.00156813	0.00328789	0.00267471	0.00416476	0.00210949	0.00342075	0.00273785
ENSG00000225762	0.0502599	NA	NA	NA	0.0121819	NA	NA	NA	NA	NA	NA	NA	0.0290693	0.0247522	0.0299342	NA	0.0391183	NA	0.0426357	NA	NA	NA	NA	0.0275836	NA	NA	NA	NA	0.0682624	NA	0.0698203	0.0325094	NA	NA	NA	0.106345	NA	0.0204222	NA	NA	NA	NA	NA	NA	NA	NA	0.0315621	NA	NA
ENSG00000269113	0.016669	0.01701	0.00288914	NA	NA	NA	NA	0.00915112	0.0069182	0.00794894	NA	0.013326	0.0144263	0.012103	0.00267081	0.00871219	0.0189953	0.00377632	0.0179924	NA	NA	NA	NA	0.0103166	0.00758399	NA	0.0315696	0.0159186	0.0076704	0.0114516	0.0117212	0.018697	0.0174078	NA	0.0238132	0.00725659	NA	2.54197e-05	NA	NA	NA	0.0158291	0.0173176	0.0153057	0.00959526	0.00505493	0.0094226	0.00645187	0.0137446
ENSG00000117834	0.124172	0.151351	0.130643	NA	NA	0.185152	NA	0.10839	0.113646	0.117637	NA	0.0363157	0.0403545	0.0727306	0.00953156	0.122626	0.128164	0.0966563	0.104196	NA	NA	NA	NA	0.115817	0.111178	NA	0.118359	0.56494	0.105671	0.111614	0.0410767	0.0735525	0.108075	0.0361075	0.100835	0.138214	NA	NA	NA	NA	NA	0.101571	0.0705183	0.187491	0.104098	0.162686	0.0838401	0.090559	0.0844376
ENSG00000132122	0.0107575	0.0131431	0.00254622	0.0357879	NA	0.0261306	0.0259496	0.00694139	0.0109172	0.0164905	NA	0.014225	0.00867436	0.0138658	0.00149201	0.00467224	0.00860624	0.0130209	0.0140804	0.0204183	0.012864	0.00999357	0.023622	0.0134282	0.00731527	0.0152242	0.0505179	0.250003	0.0102069	0.0123196	0.0123475	0.0134584	0.00956719	0.283739	0.0188761	0.0120383	0.0387109	0.026601	0.0311024	0.0232987	0.0220201	0.0130115	0.0308322	0.0099667	0.0106941	0.00732007	0.00300892	0.00950586	0.0111506
ENSG00000186094	0.021931	0.00777133	NA	0.0110329	0.0206591	0.0108916	0.0222876	0.00566047	0.0201179	0.0121516	NA	0.0430595	0.0484769	0.0115176	0.0039891	2.54197e-05	0.0230554	0.0177167	0.0161344	0.0103626	0.0042139	0.00490845	0.0150538	0.0123293	0.0153082	NA	0.019972	NA	0.0248496	0.0383639	0.0488556	0.0100877	0.0124745	NA	0.0153861	0.0380837	0.0106146	0.0161122	0.00724754	0.00843208	0.00468725	NA	2.54197e-05	0.018675	0.00388264	0.00477602	2.54197e-05	0.0177312	0.00546484
ENSG00000162373	0.0234536	0.0098684	NA	0.0114459	NA	0.0214286	0.0277578	0.00224355	0.0202845	0.0367678	NA	0.0494419	NA	0.0095313	0.0236796	2.54197e-05	0.0334136	0.0152755	0.0104186	0.0317189	0.00314747	0.0173916	0.00889077	0.0152301	0.0167399	NA	NA	NA	0.0169914	0.057856	0.0687803	0.0117716	0.0179616	NA	0.0174218	0.0185936	0.0257933	NA	0.0126187	0.0229685	0.0321749	NA	0.00551234	0.0390592	0.00516879	0.00909499	0.00139051	0.0114862	0.00762191
ENSG00000185104	0.0112784	0.00309899	0.000795811	0.0229722	0.00860602	0.0153707	0.0241228	0.00912603	0.00534414	0.00584349	0.00602746	0.0155867	0.00838865	0.00500016	0.00935923	0.00452829	0.00762495	0.00838623	0.00834816	0.00749729	0.00938641	0.0179234	0.0089273	0.00608626	0.00739474	0.00255566	0.00361867	0.0131372	0.0108376	0.00820781	0.00726508	0.00110686	0.00807757	0.0183493	0.0026964	0.0114548	0.00728214	0.00766923	0.0143349	0.0095599	0.0117155	0.00835513	0.0312195	0.00804707	0.00406826	0.00927273	0.00344684	0.0138355	0.0105169
ENSG00000123080	0.00681832	0.00476935	NA	0.0064837	0.0342635	0.00676519	0.012964	0.00608744	0.00567447	0.0100371	0.0117612	0.00872216	0.0023239	0.0016983	0.00279384	0.00481143	0.00712095	0.0123379	0.0094892	0.0258056	0.00379477	0.00255449	2.54197e-05	0.00462601	0.00290016	0.00636329	0.00555134	0.0125424	0.0134561	0.00942342	0.0139104	0.00575626	0.00757684	0.0125839	0.00666041	0.00353338	2.54197e-05	0.0411277	0.00205581	0.0134604	0.0313334	0.00973337	0.000678829	0.00714268	0.00176419	0.00433066	0.0124928	0.0168544	0.00458778
ENSG00000123091	0.0098929	0.00341395	NA	0.00122962	2.54197e-05	0.000207779	0.0128465	0.00693902	0.00556303	0.00662407	2.54197e-05	0.00141808	0.00742294	0.0034878	0.0131611	0.00155344	0.00879868	0.00452166	0.00363312	0.00855966	0.00214029	0.00516782	2.54197e-05	0.00321391	0.0011991	0.00238658	2.54197e-05	0.000971768	0.0114305	0.00143529	0.0212527	2.54197e-05	0.00337875	0.0307645	0.00567404	0.00389208	0.00424922	2.54197e-05	0.00297973	0.02349	0.0176769	2.54197e-05	0.00958786	0.00429259	0.00215516	0.00154999	0.00751706	2.54197e-05	2.54197e-05
ENSG00000085832	0.0190137	0.0141941	0.0228452	0.00553126	0.00613573	0.00649227	0.00686951	0.00907857	0.00918307	0.00653044	0.00220527	0.00792342	0.0145998	0.0107201	0.00188496	0.0103462	0.00675377	0.00931444	0.0170346	0.00279023	0.00403569	0.00409261	0.00618191	0.00709103	0.0100218	0.00381753	0.0085951	0.0103046	0.0169758	0.00687163	0.0237575	0.00844297	0.00690739	0.00693406	0.00604702	0.0151029	0.00277407	0.00545284	0.00384433	0.00305201	0.00622036	0.00477951	0.00602878	0.00891511	0.00591772	0.00707528	0.0109984	0.00731975	0.0121639
ENSG00000117859	0.0125289	0.0104783	NA	0.00639272	0.0144027	0.019427	0.0135372	0.00980485	0.0093062	0.0107315	0.008192	0.0101372	0.00687961	0.0100773	0.0044979	0.00512142	0.0124287	0.00784089	0.013821	0.00811448	0.00607591	0.0104979	0.00771111	0.0100742	0.00832639	0.0204699	0.0100872	0.00506204	0.0105331	0.013376	0.0112244	0.0092015	0.0109455	0.0121623	0.00634228	0.011042	0.0113912	0.00631936	0.00393207	0.0096291	0.00827389	0.00571081	0.0025544	0.0103281	0.00969967	0.00812958	0.00686755	0.0108235	0.00536005
ENSG00000078618	0.00399091	0.00288411	0.00096991	0.0030468	0.00283917	0.0033229	0.00474225	0.00251579	0.0038445	0.00228676	0.00219225	0.00439532	0.00299718	0.00294985	0.00179624	0.00282312	0.00376369	0.00414576	0.00432054	0.00647728	0.0029721	0.00471066	0.00211174	0.00246828	0.00284328	0.00456633	0.00246806	0.00648762	0.00292911	0.00365122	0.00362116	0.00406948	0.00302927	0.00365772	0.00351752	0.00353602	0.00302846	0.00363391	0.00407467	0.00539872	0.00348541	0.00297059	0.000402536	0.00320212	0.00206815	0.0033951	0.00183677	0.00294012	0.00133607
ENSG00000266993	0.00341555	0.00235315	NA	0.000242061	0.00220075	0.00363368	0.00386413	0.00330616	0.00428992	0.00258124	0.000951091	0.00251422	0.00217428	0.0019635	0.00216115	0.0037672	0.00372548	0.00430965	0.00377507	0.00637913	0.00322524	0.00239992	0.00120559	0.00234328	0.00390804	0.00100187	0.000774133	0.00644059	0.00394273	0.00627699	0.00377102	0.00559382	0.0026518	0.00506606	0.00389937	0.00283632	0.00195272	0.0030212	0.000276923	0.00439951	0.00277618	0.0043274	2.54197e-05	0.00396246	0.00232506	0.00275217	0.00193748	0.00433408	0.000945038
ENSG00000117862	0.00328811	0.00736819	0.0111495	0.0145667	0.00639041	0.0104456	0.00711392	0.000917619	0.00412103	0.00888669	0.00721363	0.00267809	0.00804372	0.0039973	0.00828483	0.00486659	0.00229124	0.00337738	0.00395439	0.0105095	0.00560123	0.0106397	0.00034918	0.00317275	0.00436605	0.00296346	0.00569542	0.00477195	0.00526904	0.00166248	0.00827668	0.00424877	0.00418759	0.0110214	0.000650643	0.00658843	2.54197e-05	0.00439563	0.00541421	0.00974159	0.00883112	0.00339266	2.54197e-05	0.00366084	0.00128431	0.00802393	0.00480587	0.00721471	0.00312273
ENSG00000198841	0.012648	0.0185837	NA	0.0225585	0.0184842	NA	0.0271704	0.00206002	0.00885604	0.0352233	0.0074464	0.00319994	0.0242384	0.0107175	0.0179542	0.00702652	0.00505656	0.0114428	0.0101524	0.0200896	0.0193792	0.00742952	NA	0.00982455	0.0126412	0.00793044	0.0163762	0.014552	0.0212672	0.0222068	0.00769707	0.0105052	0.0201633	0.0608623	0.00190249	0.00925756	0.010493	0.0103303	0.0105939	0.0285789	NA	0.00452754	NA	0.026409	0.00485019	0.0172687	0.0120024	0.0141324	0.0143022
ENSG00000134717	0.0371656	0.071246	NA	NA	2.54197e-05	0.00601343	0.0780389	0.0113147	0.0498741	0.00429058	0.0550706	0.00491533	0.0167988	0.00273554	0.0243354	0.0185825	0.0169454	0.0475855	0.0495888	0.0700062	0.011254	NA	NA	0.00141801	0.00876838	0.0285833	0.0100113	0.13017	0.0138025	0.0229984	0.021999	0.0130954	0.0406369	0.0674134	0.030422	0.0111903	0.084657	2.54197e-05	0.030115	0.0568241	0.0435478	0.0275294	NA	0.0171031	0.029521	0.0295002	0.0185822	0.0323656	0.0281114
ENSG00000157077	0.0167258	0.0181885	NA	NA	0.0119701	NA	0.0618217	0.00320838	0.00951878	0.00667257	NA	0.0255941	0.0100678	0.0092916	0.0014498	0.00551352	0.00933603	0.00757155	0.0288842	2.54197e-05	2.54197e-05	2.54197e-05	NA	0.0122627	0.00481951	0.00338405	0.0111798	NA	0.0116731	0.0491161	0.0263344	NA	0.0195935	NA	0.00801829	0.0284119	0.00388985	0.00295342	0.0139047	0.00768505	0.010169	0.0117634	NA	0.0233555	2.54197e-05	0.0241504	0.0114442	0.0135515	0.000272568
ENSG00000154222	0.0191215	0.0201782	0.0119508	0.00423002	0.0127922	0.0041141	0.00829606	0.0128928	0.0158883	0.0159989	0.0233372	0.012176	0.0200006	0.012148	0.00472862	0.00618162	0.0143239	0.00477145	0.0193825	0.016023	0.0225948	0.0218581	0.01196	0.0157324	0.0195184	0.0112809	0.0183191	0.00861791	0.0191542	0.0202081	0.0239778	0.0231168	0.0120748	0.0331243	0.00373316	0.0140958	0.0189111	0.0209884	0.00649417	0.00211389	0.00078433	0.0161026	0.00450207	0.020707	0.00258279	0.0101597	0.00760976	0.0128947	0.0117913
ENSG00000134748	0.00523946	0.00802732	0.00207565	2.54197e-05	0.00482487	0.0100051	0.00827883	0.00974647	0.0117273	0.00524945	0.0260444	0.0206795	0.00759816	0.00805326	0.00174988	0.0044155	0.00727626	0.0080237	0.0086744	0.00433413	0.00516527	0.00402444	0.0107931	0.00183409	0.00310415	0.00710993	0.0122512	0.00796256	0.0101724	0.00516671	0.00518318	0.00369725	0.00766301	0.0108729	0.00362141	0.011874	0.000313505	0.00431039	0.0159178	0.00402028	0.00427321	0.00583639	2.54197e-05	0.00927989	0.00132906	0.00554234	0.00253901	0.00218514	0.00222905
ENSG00000134744	0.00454973	0.00681802	0.00644115	0.00369893	0.00464738	0.0098225	0.0038644	0.007616	0.00544211	0.00565196	0.00575616	0.00997423	0.00380551	0.00309221	0.00388709	0.00190296	0.0045234	0.00616581	0.00587862	0.00433296	0.00452567	0.0068142	0.0123398	0.00210398	0.00381744	0.00336831	0.00781571	0.00777066	0.00641545	0.00701065	0.00437274	0.00444521	0.00381629	0.00960489	0.00461651	0.00687559	0.00245167	0.00455344	0.00607612	0.00824306	0.00732024	0.00406928	0.00214308	0.00553999	0.00299522	0.00361619	0.00372845	0.00339507	0.00179358
ENSG00000116157	0.0798736	0.126151	0.0659831	0.0273203	0.0095917	NA	0.0193421	0.0287126	0.0300846	0.0697219	0.320142	0.15713	0.0817402	0.0590801	0.0245988	0.0535926	0.0891661	0.0983978	0.0672346	0.0155359	0.0258554	0.00702743	0.0346058	0.0441237	0.0360947	0.222098	0.0533525	0.415733	0.0519823	0.0605139	0.0801385	0.0631706	0.0365962	0.0959676	0.0394697	0.09245	0.0263983	0.0314925	0.0176718	0.014278	0.0211242	0.0582012	0.0672531	0.11141	0.0712292	0.104987	0.268057	0.109695	0.0553617
ENSG00000162377	0.0123039	0.0143598	2.54197e-05	0.0156328	0.0177472	0.0203075	0.0131171	0.00964031	0.010314	0.0163931	0.00807622	0.0117099	0.0126841	0.0129958	0.00932557	0.0214842	0.0314305	0.0173213	0.0106526	0.0154744	0.0221798	0.0131457	0.0153184	0.00577333	0.014746	0.00635625	0.00871908	0.0099919	0.0177562	0.0235225	0.0155336	0.00948977	0.00851544	0.0555097	0.00973743	0.0208369	0.0126832	0.0122417	0.012402	0.0135637	0.0188668	0.0111963	0.0115109	0.0164622	0.00879994	0.0139547	0.00967539	0.00711957	0.00872332
ENSG00000162378	0.00622416	0.0040204	0.00753572	0.00572675	0.00146488	0.00554911	0.00952971	0.0019428	0.00167463	0.00622583	0.00984096	0.00395777	0.00496534	0.00587234	0.00203657	0.00258546	0.00264701	0.00480671	0.00602263	0.00448245	0.00452134	0.00395	0.00317937	0.00373065	0.00148175	0.000633524	0.0080014	0.0049861	0.00500625	0.00420506	0.0106662	0.00303095	0.00307348	0.0171061	0.00387191	0.00303761	0.00462969	0.00143318	0.0027275	0.0077519	0.0121313	0.00742097	2.54197e-05	0.00354454	0.00221067	0.00257824	0.00171151	0.00357175	0.00120905
ENSG00000121310	0.015072	0.0176988	0.0167946	0.0260414	0.0228957	0.0322486	0.0274208	0.0171519	0.0164866	0.0217692	0.0724909	0.00933933	0.0184565	0.0162773	0.0101375	0.019937	0.0216438	0.013393	0.0151738	0.0224795	0.0310516	0.0230897	0.0346099	0.0132645	0.0140556	0.0362668	0.0233497	0.0129702	0.0130637	0.0144268	0.0202741	0.0231761	0.0123998	0.032496	0.0200974	0.0213275	0.0335928	0.0204122	0.0387069	0.0160059	0.00859293	0.0113379	0.0201709	0.0195333	0.0139549	0.0123025	0.016392	0.0144273	0.0172002
ENSG00000116171	0.00208665	0.000812493	NA	0.00162329	0.00388247	0.0023257	0.00399933	0.00214123	0.00189708	0.00379648	0.0252297	0.00322969	0.00243029	0.0014338	0.00279917	0.00101512	0.00284675	0.00178861	0.00268154	0.000698094	0.00168903	2.54197e-05	0.000883362	0.00160694	0.00119807	0.00163017	0.00365649	0.00396848	0.00326379	0.00209144	0.00269609	0.0189803	0.00242681	0.013	0.00361554	0.00262124	0.00469598	0.00609111	0.00348702	0.0015502	0.00202226	0.00109992	0.001012	0.00253299	0.00236834	0.000762706	0.00124425	0.00153767	0.000683755
ENSG00000174348	0.00604228	0.00587102	0.00659957	0.0188089	0.052717	0.0559433	0.021477	0.0101369	0.0105017	0.0100604	NA	0.0103654	0.00571416	0.0138479	0.0121366	0.00550354	0.00670128	0.0104294	0.00551586	0.0207678	0.0289931	0.0126529	0.00762169	0.0101741	0.00860857	0.0791277	0.00743785	0.0157184	0.00616968	0.00844294	0.00561761	0.028715	0.00695393	0.127558	0.00687079	0.00693382	0.0203891	0.0292762	0.0203168	0.0305434	0.0194409	0.00829736	0.00939349	0.00770191	0.00872243	0.0222876	0.00436884	0.0105535	0.011944
ENSG00000162383	0.0416611	0.0292638	0.0583732	0.311375	0.324457	0.352176	0.397923	0.0598795	0.0488144	0.0390721	NA	0.0626453	0.0554581	0.0853511	0.0244586	0.0721174	0.0395734	0.0492434	0.0486128	0.299292	0.346715	0.284366	0.347611	0.0578812	0.0383075	0.095352	0.0380249	0.141314	0.0396244	0.0490626	0.0503805	0.0436753	0.0492774	0.236574	0.0840257	0.0487178	0.277646	0.29345	0.39361	0.317725	0.278043	0.0394525	NA	0.0451376	0.0499209	0.0792198	0.0609929	0.0362238	0.0428097
ENSG00000157184	0.0116019	0.00727681	2.54197e-05	0.00114882	0.00120471	0.0202425	0.00264738	0.00888446	0.00545643	0.00386841	0.000833501	0.00205974	0.0053934	0.0050836	0.00152569	0.00243992	0.008734	0.0129866	0.00669586	0.0116608	0.0233906	0.00106031	0.0135736	0.00358992	0.00850288	0.0037614	0.00356243	0.00478711	0.0108285	0.00751956	0.00603254	0.00687159	0.00428982	0.0267605	0.00240175	0.00811719	0.00497171	0.00752995	2.54197e-05	0.0123631	0.00334879	0.00199198	0.00351293	0.01024	0.00776645	0.00171739	0.00469869	0.00457033	0.0168855
ENSG00000236723	0.0208993	0.0159268	2.54197e-05	2.54197e-05	0.0122326	0.0240454	0.000845798	0.00847539	0.0151669	0.00430454	0.00576771	0.00763365	0.0102889	0.0102857	0.00486082	0.00102711	0.011806	0.0207563	0.0114831	0.0195737	0.0386637	0.000858979	0.0145478	0.00680105	0.01059	0.0055769	0.00528736	0.00868242	0.0133639	0.013472	0.0188428	0.00330161	0.0105047	0.0307227	0.00409628	0.0186435	0.0163971	0.0101872	0.00219195	0.0140492	0.0223236	0.00137272	0.00773263	0.0206354	0.0135873	0.00650475	0.0127002	0.00955586	0.0193336
ENSG00000162384	0.0197165	0.018714	0.022957	0.0201783	0.0219736	0.0259426	0.0231644	0.0196578	0.0175921	0.0211718	0.0162086	0.0186918	0.015458	0.0160498	0.00847625	0.0150662	0.0215806	0.021927	0.0162134	0.0200891	0.0214395	0.0211799	0.023912	0.0224144	0.0167192	0.0194161	0.0217421	0.0239644	0.0155506	0.0144484	0.0200208	0.0197315	0.0193655	0.027123	0.0216231	0.0234881	0.0219154	0.0227948	0.0238744	0.017769	0.0167846	0.0144639	0.0225499	0.0190916	0.0123906	0.0187965	0.0149077	0.0178595	0.0201294
ENSG00000162385	0.0232276	0.0207449	NA	NA	0.0143045	NA	NA	0.0231133	0.0126248	0.0275881	0.0091242	0.016382	0.0169706	0.0113298	0.00362481	0.0089814	0.0275334	0.00290783	0.0147643	0.00475085	NA	NA	NA	0.0146081	0.013505	2.54197e-05	0.00971403	0.0343683	0.0142775	0.00797402	0.0213507	0.0138011	0.0365661	0.0363826	0.00645377	0.0281225	NA	0.00640131	NA	NA	NA	0.0194384	0.0326902	0.0230248	0.00706698	0.0088634	0.004306	0.00902026	0.0127932
ENSG00000157193	0.038287	0.015179	NA	0.0124826	0.0160908	0.0150921	0.0108632	0.0551104	0.0383631	0.0187416	0.00468228	0.0371654	0.0212372	0.0250186	0.00366501	0.0138052	0.0249508	0.0315995	0.0522972	0.00691309	0.0104723	0.00977046	0.00725591	0.0218604	0.0562134	0.0140963	0.031027	NA	0.0328243	0.0323723	0.0239526	0.00938304	0.205501	0.0169976	0.020734	0.0197057	0.00996504	0.0167894	0.0110319	0.00576575	0.0205031	0.00771444	0.00566471	0.0260946	0.0339154	0.0070881	0.00777071	0.0279429	0.0112977
ENSG00000174332	0.0337912	0.0526433	0.0149559	NA	0.0825847	0.0180587	0.0167359	NA	NA	0.0343617	NA	NA	0.0165451	0.0367764	0.00598122	0.00876849	0.0189736	0.0227688	0.0298097	0.0128539	0.00808337	0.00620495	NA	0.0366453	0.0453339	0.033626	NA	NA	0.0366435	0.00942881	0.0148712	0.0882434	0.0435072	NA	NA	0.0335523	0.0118583	0.0647206	0.010163	0.00936568	0.0032262	0.027679	0.00570791	NA	0.233338	NA	0.0115235	0.0154187	0.025891
ENSG00000058804	0.0191929	0.0522568	NA	0.0286666	0.0252348	0.0231824	0.0479182	0.0388582	0.0248637	0.0232474	0.0103541	0.0552702	0.0230502	0.00882073	0.00908068	0.0315193	0.0298786	0.0280065	0.0261176	0.0528398	0.024279	0.0629496	NA	0.0204597	0.0307758	0.0148886	0.0566118	0.0633673	0.0236377	0.0111382	0.0140642	0.0227176	0.0216949	NA	0.0342435	0.0340847	0.017788	0.0180899	0.0355119	0.0448977	NA	0.014747	NA	0.011924	0.0126274	0.0157848	0.0305276	0.0212121	0.0278606
ENSG00000058799	0.0101756	0.0121912	0.00475266	0.013294	0.00381072	0.0231293	0.013358	0.00913765	0.0106944	0.0152726	0.00692892	0.0065674	0.00711859	0.00525778	0.0113047	0.00856452	0.0114567	0.0145611	0.0164057	0.0124685	0.020495	0.0194414	0.0209904	0.00654332	0.0103841	0.0167926	0.00846284	0.00355495	0.0123908	0.00898722	0.0133176	0.00742	0.00944181	0.0199395	0.00979998	0.0140702	0.0266486	0.00590313	0.0156247	0.0117826	0.0165818	0.0136952	0.0122335	0.0139729	0.00586465	0.00662076	0.00608329	0.0064501	0.0079316
ENSG00000081870	0.0318606	0.0250891	NA	0.0628509	0.0189883	0.0527372	0.0264466	0.0440892	0.0298113	0.0434975	0.0170284	0.0286133	0.0320607	0.0309781	0.0196575	0.0231884	0.0200407	0.0175838	0.0221563	0.0143948	0.0315146	0.0288917	0.0402061	0.0409687	0.0326347	0.0264509	0.025864	0.0100851	0.0226729	0.0309552	0.031197	0.0220255	0.0491486	0.0262413	0.0338816	0.0256555	0.0397233	0.0309834	0.0265611	0.00940494	0.0371526	0.0240203	0.0314318	0.0333177	0.0173402	0.0536247	0.0313047	0.0402273	0.015842
ENSG00000116212	0.00820887	0.00219582	0.00371933	0.0192787	0.00562626	0.0138559	0.0062665	0.00127089	0.00364047	0.00276096	0.00113957	0.00673794	0.0039587	0.00709076	0.00211929	2.54197e-05	0.00385249	0.00571745	0.00148231	0.00634593	0.0019134	0.00174204	0.00450986	0.000767787	0.00259038	0.00119111	2.54197e-05	0.00301443	0.00112024	0.0121871	0.00435531	0.00308215	0.00414655	0.0150437	0.00181661	0.00607734	0.00892714	0.0031139	0.00724303	2.54197e-05	0.00475817	0.00251579	2.54197e-05	0.00554085	0.00403962	0.00362155	0.00618181	0.00909093	0.000398243
ENSG00000116209	0.0326812	0.047017	0.0428148	0.0496929	0.0135434	0.0206914	0.0427471	0.0257967	0.0296486	0.0288824	0.0306527	0.0272457	0.0219614	0.0177699	0.0440053	0.0363501	0.0280711	0.0428266	0.0292932	0.0240263	0.0220781	0.0213712	0.0360731	0.0259009	0.0283861	0.0418123	0.0653049	0.0464768	0.0257413	0.0640255	0.0270632	0.0129926	0.0242336	0.043737	0.0407418	0.0391098	0.0211642	0.0110044	0.0266673	0.0383844	0.0303361	0.0278137	2.54197e-05	0.0283328	0.0257215	0.0183784	0.032123	0.0278635	0.0300373
ENSG00000116205	0.022523	0.01269	NA	0.00672942	0.0351125	0.0513294	0.0241051	0.0245201	0.0102569	0.0218498	0.00635368	0.0179489	0.0136456	0.0046392	0.00227136	0.0268109	0.0155842	0.013207	0.0295615	0.016773	0.0103379	0.0224217	0.0234388	0.0135672	0.0126781	0.00633874	0.0296288	NA	0.0127511	0.0278142	0.0189605	0.0363361	0.0372001	0.0205592	0.00680091	0.0196011	0.0162076	0.0136158	0.00177344	0.0211521	0.0201423	0.0108756	NA	0.0217665	0.0337716	0.0182088	0.0103693	0.0218537	0.0355496
ENSG00000157211	0.0710066	NA	NA	NA	NA	NA	NA	NA	NA	NA	NA	NA	NA	NA	NA	NA	NA	NA	NA	NA	NA	NA	NA	NA	NA	NA	NA	NA	NA	NA	NA	0.0253741	NA	NA	NA	NA	NA	NA	NA	NA	NA	NA	NA	NA	NA	NA	NA	NA	NA
ENSG00000215883	0.0137951	0.012811	2.54197e-05	0.013501	0.0131622	0.00987776	0.0117008	0.00761847	0.00897998	0.0189049	0.00499829	0.0104529	0.0181213	0.0107554	2.54197e-05	0.00617381	0.0171952	0.00877821	0.0163924	2.54197e-05	0.00751191	0.0229413	0.00143036	0.00640194	0.0137034	0.00333654	0.0292473	0.00128062	0.0102785	0.0103732	0.0164449	0.0102167	0.0126559	0.0310412	0.0015723	0.017094	0.00985738	0.0107881	0.0185259	0.011527	0.00833384	0.0118435	0.0173829	0.0122344	0.0147112	0.00872539	0.00549912	0.0111526	0.00872991
ENSG00000116221	0.00253628	0.00266366	0.0108721	0.00417424	0.00289668	0.00719377	0.00310583	0.00316835	0.00285425	0.0062004	0.00082886	0.00166905	0.00149194	0.00582611	0.00719686	0.00442808	0.00253979	0.00499105	0.00356199	0.00525096	0.00562554	0.00511223	0.00235977	0.00457455	0.00292965	0.0012921	0.00421333	0.00328679	0.00581595	0.00867173	0.0017081	0.00629082	0.00878568	0.00747633	0.000715277	0.00151543	0.00630734	0.00380413	0.00456902	0.00473417	0.00517208	0.00209832	0.00483226	0.00473262	0.00725906	0.0089504	0.00321608	0.00375236	0.00556991
ENSG00000157216	0.00496648	0.00551554	2.54197e-05	0.0021708	0.00377884	0.00274724	0.00450371	0.00495678	0.00361121	0.0206094	0.00219333	0.0117475	0.00302394	0.00134087	0.00793444	0.00353347	0.0058418	0.00633761	0.0052679	0.0044547	0.00155454	0.00062892	0.00634731	0.00539919	0.00658005	0.00319697	0.0152399	0.03904	0.00378746	0.00384253	0.00331055	0.00560328	0.00405343	0.0180924	0.00570243	0.007119	0.00176422	0.00329064	0.00121261	0.0026989	0.00340157	0.0039043	0.00542951	0.00496663	0.001226	0.0021965	0.000155552	0.00697276	0.000660052
ENSG00000198711	0.0364604	0.0393686	NA	NA	0.0159972	NA	NA	0.0531103	0.0388136	NA	NA	NA	0.0153377	0.0274473	0.0119067	0.0268447	0.0372123	0.0173834	0.0647195	NA	NA	NA	NA	0.0045745	0.0148027	NA	NA	0.187423	0.0212002	0.0347425	0.0277817	0.0588695	NA	NA	NA	0.0349868	NA	0.0181572	NA	NA	NA	NA	NA	0.0359652	0.0123317	0.038463	NA	0.0254287	0.00999419
ENSG00000162390	0.0554756	0.0370448	0.0363106	0.0286018	0.00743247	0.0437045	0.0481048	0.0398847	0.0362327	0.0256224	NA	0.0297563	0.0298478	0.0659862	0.0222806	0.0288877	0.0493783	0.0291487	0.0548142	0.0487296	0.0566444	0.0347307	0.0418216	0.0167375	0.0402848	0.02678	0.0391137	0.160581	0.035565	0.0348547	0.0397782	0.0620051	0.0308614	NA	0.101431	0.0413259	0.0441175	0.0167888	0.0460468	0.0382194	0.0692364	0.066459	0.0335709	0.0370338	0.0305404	0.0244787	0.0226635	0.0264929	0.0365239
ENSG00000184313	0.0301682	0.0127757	0.0116286	0.0156918	0.0194394	0.0251339	0.0206186	0.0190571	0.0123327	0.0484975	NA	0.0356196	0.0217167	0.0307327	0.00267788	0.0139957	0.0418944	0.012773	0.0247696	0.0176987	0.0166306	0.0219951	0.0227467	0.0224486	0.0122206	0.0384428	0.059184	0.0562609	0.0340115	0.0196427	0.0195417	0.05511	0.0478449	NA	0.0806953	0.0148693	0.0212212	0.0182968	0.0203456	0.0122083	0.0410761	0.0298539	0.0338759	0.0479751	0.0214397	0.0200336	0.0275356	0.0358933	0.0261201
ENSG00000243725	0.0223902	0.0128028	2.54197e-05	0.0143217	0.0116727	0.0273603	0.0116566	0.0178511	0.0114555	0.0135503	0.00578106	0.0239088	0.0130157	0.0286956	0.00683671	0.0123994	0.0138028	0.0143026	0.0232089	0.00799004	0.0110418	0.0222772	0.0457172	0.00927341	0.0131463	0.00441616	0.0159519	0.0208718	0.0481589	0.0173192	0.0150797	0.0277573	0.0218059	0.0240749	0.00621845	0.0186448	0.00694089	0.0159789	0.00689688	0.0122517	0.117524	0.00543588	0.0100152	0.0253911	0.0285048	0.0124694	0.0130627	0.0123715	0.0260926
ENSG00000116133	0.014254	0.0116798	0.00693177	0.0102752	0.00383651	0.0196141	0.013557	0.0102854	0.0183312	0.00636804	0.0221079	0.00705476	0.00399239	0.00662988	0.00636563	0.00268283	0.0118153	0.0134507	0.0105539	0.00876536	0.00500402	0.0128074	0.0351408	0.00649946	0.0178325	0.0218641	0.0165103	0.00270209	0.0150813	0.00362717	0.00638584	0.00865062	0.0199956	0.0333176	NA	0.00928288	0.00618514	0.00309532	0.0060865	0.00515732	0.0287204	0.00391183	0.00643972	0.00226264	0.00586035	0.0210842	0.00278309	0.00832018	0.00768593
ENSG00000242396	0.0578898	NA	NA	NA	NA	0.0943447	NA	NA	NA	NA	NA	NA	0.0218854	NA	0.0260229	NA	0.0348077	NA	0.0198487	NA	NA	0.113159	NA	NA	NA	0.0724824	NA	0.0147887	0.0533488	0.0302195	0.0706584	0.0337497	NA	NA	0.0467884	0.0303069	NA	0.0199866	0.0226598	NA	0.0955349	0.0203025	NA	0.0252017	NA	NA	0.112214	NA	NA
ENSG00000143001	0.111513	0.0951778	NA	NA	0.0388535	NA	NA	0.105191	0.154751	NA	NA	0.0401564	0.054172	0.0352279	NA	0.231625	NA	NA	0.0550335	NA	NA	NA	NA	0.0421665	0.125118	NA	NA	NA	0.0901818	0.0515471	0.0660592	NA	0.13147	NA	0.0871723	0.112238	NA	0.0287659	NA	NA	NA	0.053548	0.0183625	0.124014	NA	0.00464419	0.0151368	0.0468843	NA
ENSG00000162402	0.0130164	0.0102529	0.00419069	0.000353814	0.00240384	0.00476418	0.0030919	0.00477855	0.00445756	0.0057407	0.00592097	0.00642096	0.00725937	0.00555164	0.00221554	0.00440844	0.00541268	0.00509689	0.00933331	0.00270322	0.00494923	0.00125287	0.00479306	0.00521968	0.00600891	0.00247892	0.00421443	0.00957391	0.00828651	0.00546915	0.0108925	0.00478045	0.00673759	0.00999222	0.00355866	0.00899317	0.00225299	0.00164248	0.00201376	0.000946291	0.0074038	0.00534874	0.00960375	0.00619283	0.00488259	0.00525286	0.00912631	0.00516375	0.00521107
ENSG00000234810	0.0901708	NA	NA	NA	NA	NA	NA	NA	NA	NA	NA	NA	0.070479	NA	0.0069891	NA	NA	NA	0.028898	NA	NA	NA	NA	NA	NA	0.0314775	NA	NA	0.0181717	NA	0.0627873	NA	0.0750836	NA	NA	0.0431132	NA	NA	NA	NA	NA	NA	NA	NA	NA	NA	NA	NA	NA
ENSG00000260971	0.0844142	0.0514511	NA	NA	NA	NA	NA	NA	NA	NA	NA	NA	NA	NA	NA	0.0590819	0.0644432	NA	0.090749	NA	NA	NA	NA	NA	0.112134	NA	NA	NA	0.0489493	0.0328673	NA	NA	0.0367706	NA	NA	0.101817	NA	NA	NA	NA	NA	NA	NA	0.0406286	NA	NA	NA	NA	0.0177294
ENSG00000162407	0.00429606	0.00815289	0.0025052	0.00397241	0.0104811	0.0108144	0.0052578	0.00352891	0.00302945	0.00359684	NA	0.00470042	0.0037922	0.00174608	0.00273337	0.00323886	0.00285982	0.00793239	0.00420965	0.00354372	0.00661003	0.00603932	0.0036563	0.00360098	0.00262388	0.022119	0.00494912	0.00267607	0.00279373	0.00413997	0.00421308	0.00437066	0.00294511	0.0557163	0.00399226	0.0078088	0.00701339	0.00927496	0.00524062	0.00593055	0.00535731	0.00391024	0.00324012	0.00498298	0.0061231	0.00247798	0.00207257	0.00350267	0.00365569
ENSG00000162409	0.0140747	0.00452225	0.0116879	0.0146317	0.00484645	0.0263439	0.00591617	0.00374764	0.00259776	0.00403308	NA	0.0129253	0.00591578	0.00397177	0.00905263	0.0148948	0.0100955	0.00778579	0.0163582	0.00503456	0.0071154	0.00440946	0.00477161	0.00907064	0.00372395	0.0111406	0.00339162	NA	0.00765103	0.0104895	0.0200421	0.037655	0.00935348	NA	0.0261609	0.00836856	0.0121992	0.00495276	0.00200146	0.00541218	0.0411432	0.00646317	0.000283161	0.0145539	0.00570856	0.00752813	0.005944	0.00529768	0.00687981
ENSG00000173406	0.111966	0.160788	2.54197e-05	0.00671178	0.0133509	0.00566876	0.0286341	0.0592725	0.0720821	0.0713244	NA	NA	0.207149	0.00629462	0.0113249	0.0911753	0.14037	0.132762	0.208666	0.0352698	0.0269295	0.0026828	0.00366798	0.116457	0.0948144	0.033541	0.107356	0.0208161	0.0181222	0.0978667	0.1626	0.157407	0.164654	NA	0.13653	0.161133	0.0130052	0.0137746	0.00885349	0.0235654	0.0555453	NA	NA	0.220941	0.0831194	0.153415	0.114078	0.0517121	0.0833797
ENSG00000162600	0.0405902	0.0355336	0.0222732	0.00853995	0.0201753	0.0117805	0.0079591	0.0305285	0.0268727	0.0264318	0.0203339	0.0161992	0.0129163	0.0168789	0.0120634	0.0256794	0.0322431	0.0277598	0.0292505	0.0051318	0.0101115	0.0157674	0.0116662	0.0216162	0.0308602	0.0159519	0.018313	0.0320214	0.0127922	0.0242322	0.02059	0.022708	0.0240367	0.0318538	0.0110436	0.0403683	0.0193586	0.0166511	0.0082067	0.00601916	0.0228422	0.00989715	0.0125937	0.0284203	0.0206395	0.020593	0.0128347	0.0203656	0.0291365
ENSG00000184292	0.100481	0.0899221	0.00965612	NA	NA	NA	NA	0.360341	0.250455	NA	NA	0.00901028	0.00529877	0.140309	0.0790023	0.0150466	0.181197	0.120758	0.0644898	NA	NA	NA	NA	0.17453	0.121915	0.0882837	NA	0.0885773	0.0427438	0.013343	0.00477199	0.0900524	0.084737	0.431099	0.101224	0.240308	NA	NA	NA	NA	NA	0.0101759	0.0108615	0.0367623	0.134301	0.161294	0.0192272	0.0602687	0.764225
ENSG00000162601	0.00519993	0.00593881	0.00295086	0.00901456	0.0087019	0.00979862	0.011901	0.00699703	0.00560029	0.00663395	0.00347907	0.0057709	0.00487269	0.00800202	0.00549765	0.00427395	0.00595826	0.00727397	0.00529643	0.00748206	0.0109671	0.00624064	0.00961027	0.00575274	0.00586784	0.00515137	0.00745815	0.00835904	0.00486581	0.00589222	0.00481013	0.010427	0.00546161	0.00895836	0.00726445	0.00587348	0.00748351	0.00507551	0.00701815	0.00990532	0.00706964	0.00413606	0.00737217	0.0055637	0.00497435	0.00625817	0.00574525	0.0058337	0.00498581
ENSG00000283445	0.131155	NA	NA	NA	NA	NA	NA	NA	NA	NA	NA	NA	0.050797	NA	0.063549	0.0846896	NA	NA	0.102889	NA	NA	NA	NA	NA	NA	0.133137	NA	NA	0.272483	0.0947199	0.0596358	NA	NA	NA	NA	NA	NA	NA	NA	NA	NA	0.121133	0.0897848	0.100618	NA	NA	0.0409925	NA	NA
ENSG00000177606	0.00356974	0.00514339	NA	2.54197e-05	0.00171642	0.00667229	0.00049608	0.00405568	0.00289678	0.000932268	0.0152659	0.00195276	0.00309162	0.00323252	0.000832076	0.00210366	0.00147404	0.0049788	0.00273191	0.00165437	0.0020367	0.00458169	2.54197e-05	0.00153364	0.00338039	0.00342192	0.0028912	0.00367964	0.00449738	0.00306288	0.00373739	0.00599171	0.0021537	0.00410597	0.00210596	0.00315351	0.0028801	0.000962752	0.00130598	0.00426396	0.000197863	0.0045963	0.00240393	0.0022096	0.00551398	0.00246965	0.00179355	0.00236639	0.0029356
ENSG00000237352	0.153739	0.186634	NA	NA	NA	NA	NA	NA	NA	NA	0.0134987	0.0140085	NA	0.0266245	0.0238898	0.0119042	0.0555224	0.253529	0.168337	NA	NA	NA	NA	0.0353698	0.0752285	0.00520933	NA	NA	0.153971	0.0383338	NA	0.00753534	0.0414693	NA	NA	0.306892	NA	NA	NA	NA	NA	0.0316717	NA	NA	0.0194067	NA	NA	0.0307973	0.00517695
ENSG00000224609	0.280992	0.616765	NA	NA	NA	NA	NA	NA	NA	NA	NA	NA	NA	NA	0.0348559	NA	0.234656	NA	0.546559	NA	NA	NA	NA	NA	NA	NA	NA	NA	0.514516	NA	NA	NA	NA	NA	NA	0.893867	NA	NA	NA	NA	NA	NA	NA	NA	NA	NA	NA	NA	NA
ENSG00000172456	0.0271492	0.0171135	0.00145549	0.0157078	0.00753593	0.0440255	0.0262738	0.0282883	0.0229289	0.0135953	0.00949866	0.0156419	0.0114208	0.0147848	0.00324919	0.0219318	0.0235062	0.0221527	0.0125588	0.0170055	0.0267413	0.00799671	0.0103336	0.0133111	0.0231684	0.00708124	0.027306	0.0114592	0.0123777	0.0149469	0.0204191	0.0346661	0.0141306	0.0392075	0.0144115	0.0183382	0.0150339	0.00665382	0.0430367	0.01191	0.0494444	0.0135911	0.0296571	0.0179985	0.0182626	0.00742976	0.0131566	0.021514	0.0144668
ENSG00000162599	0.00414174	0.0015554	0.00481607	0.00325995	0.00322341	0.00387349	0.00402416	0.00209703	0.00164972	0.00302152	NA	0.0112781	0.0063763	0.00432776	0.00409527	0.00589678	0.00299692	0.00577315	0.00436006	0.00124858	0.00649317	0.00244918	0.00576067	0.00280687	0.00110591	2.54197e-05	0.00150576	0.00214587	0.00456976	0.0033458	0.00674068	0.00652534	0.00383539	NA	2.54197e-05	0.00415881	0.00754678	0.00390999	0.00474859	0.00341134	0.00949929	0.00655776	0.00794288	0.00424385	0.00409012	0.00736207	0.00517872	0.00385899	0.0014512
ENSG00000162604	0.00747347	0.00760944	0.000449429	0.0125051	0.00190142	0.00662816	0.0070763	0.00843428	0.00563236	0.00356789	0.00312827	0.00439224	0.0056935	0.00323275	0.00462654	0.00664661	0.00351028	0.00484591	0.010262	0.00644014	0.00335166	0.00866063	0.0105838	0.00423774	0.00569828	0.00328088	0.00753182	0.011875	0.00331521	0.00386119	0.00514188	0.00394549	0.00453831	0.0245952	0.00860034	0.00631	0.0194594	0.00411755	0.000955802	0.0153672	0.00938502	0.00247775	0.00629334	0.00871758	0.0027951	0.00544589	0.00272443	0.00413143	0.00258406
ENSG00000132849	0.00942279	0.00827621	0.00491998	0.0181199	0.00776503	0.0158596	0.0116207	0.00693715	0.0102572	0.0139788	0.0159658	0.0038728	0.00404763	0.00410392	0.00546348	0.00505774	0.00855499	0.00906997	0.00537547	0.011114	0.0157117	0.0147305	0.0148836	0.00601132	0.00954054	0.0112102	0.0137204	0.0113871	0.0101632	0.00383537	0.00458183	0.00763025	0.00342449	0.0268481	0.0110935	0.00894347	0.00309838	0.00888409	0.00895562	0.00999983	0.0166505	0.00382908	0.00451162	0.00605979	0.00572296	0.00366604	0.00199759	0.00502995	0.00792869
ENSG00000240563	0.893867	NA	NA	NA	NA	NA	NA	0.893867	NA	NA	0.893867	NA	NA	0.893867	0.0032596	0.688414	NA	NA	0.893867	NA	NA	NA	NA	0.0763207	NA	0.893867	NA	NA	0.419309	NA	NA	0.439393	0.893867	NA	NA	NA	NA	NA	NA	NA	NA	NA	NA	0.193085	NA	NA	NA	NA	NA
ENSG00000132854	0.0471333	NA	NA	NA	NA	0.0493711	NA	0.0624645	0.0581542	NA	NA	0.0172062	0.0267152	NA	0.0170027	0.0387977	0.0219311	0.0205213	0.017823	NA	NA	0.0147473	0.024303	0.041739	0.0482633	NA	NA	0.0486024	0.00719801	0.0359479	0.049896	NA	0.0927438	NA	NA	NA	NA	NA	NA	2.54197e-05	0.00903929	NA	0.0368677	0.0374055	NA	NA	0.0403198	0.0599634	NA
ENSG00000162607	0.0102379	0.00883896	0.0112341	0.00912639	2.54197e-05	0.0179895	0.0126408	0.00519024	0.00497422	0.00461074	2.54197e-05	0.000854586	0.00603592	0.00428792	0.00149683	0.0020632	0.01093	0.00602456	0.00563418	0.00756108	0.0147104	0.0175469	0.0181322	0.00327696	0.00439239	0.00219286	0.0151045	0.0103514	0.00560878	0.00790681	0.00673856	0.00872378	0.00559309	0.0330012	0.00292221	0.00554887	0.00511037	0.00281462	0.00911399	0.00647614	0.0142748	0.00429121	0.0302663	0.00976051	0.00225598	0.00482099	0.00124805	2.54197e-05	0.00374776
ENSG00000116641	0.0106846	0.0148064	0.0394833	0.0236674	0.0257802	0.0146925	0.019623	0.00880071	0.0135875	0.0312781	0.0129332	0.00628512	0.0152867	0.0170269	0.0109994	0.00670775	0.0126014	0.0198249	0.0111126	0.0168856	0.0177701	0.0258692	0.0147359	0.0133623	0.0238987	0.013474	0.0132148	0.00381157	0.00725631	0.0173331	0.0142298	0.0127896	0.0150237	NA	0.0136165	0.0118657	0.0177082	0.0112739	0.010307	0.0242344	0.0185334	0.0166079	0.00812361	0.0180504	0.0104572	0.0105784	0.00875257	0.00988274	0.0080337
ENSG00000125703	0.0131981	0.0162965	0.023832	0.012891	0.0135172	0.0148264	0.00675141	0.0124891	0.0136437	0.0113805	0.0276078	0.00877017	0.0152674	0.0091643	0.0119697	0.00480944	0.0115212	0.0197022	0.0155117	0.00768575	0.0113718	0.0112949	0.0107602	0.00852545	0.0133278	0.0105185	0.0116186	0.020184	0.0181044	0.0178038	0.0226119	0.012623	0.016454	0.0644962	0.00680264	0.0289344	0.00843523	0.0156064	0.00926985	0.0132098	0.00963364	0.0076655	0.0103304	0.0143941	0.00797063	0.0161367	0.00701446	0.012149	0.00752885
ENSG00000088035	0.00845245	0.00563699	0.0134581	0.0220265	0.0170885	0.0138476	0.0139724	0.0103099	0.00857937	0.0137867	0.007968	0.00937807	0.00312474	0.0048488	0.00552192	0.00346671	0.00844285	0.00465977	0.013219	0.00873536	0.00732289	0.0145654	0.012143	0.00337067	0.0104356	0.00610717	0.0176852	0.00459981	0.00514442	0.0142692	0.00482291	0.00813663	0.00582982	0.014891	0.00892544	0.0124435	0.0157273	0.013704	0.0202051	0.00683148	0.0142768	0.00378494	0.00724957	0.0144064	0.01162	0.0158797	0.0024007	0.00925269	0.00102618
ENSG00000142856	0.114821	0.170894	0.175309	0.123148	0.029681	0.0759642	0.109269	0.115638	0.104971	0.032705	0.0070696	0.134736	0.0551827	0.0500971	0.0112057	0.113611	0.0999238	0.109413	0.0812524	0.0812139	0.0895909	0.0491059	0.128709	0.0791583	0.1169	0.0428122	0.0656183	0.271621	0.0986534	0.0885731	0.0617863	0.0362493	0.118093	0.0465868	0.111697	0.126055	0.0968709	0.0194945	0.0616783	0.0496137	0.0651573	0.0242996	0.0913348	0.0793078	0.119502	0.114801	0.0618012	0.0982018	0.0690726
ENSG00000203965	0.0168736	0.0301756	0.0112064	0.00674105	0.0092368	0.0194678	0.0164984	0.00650603	0.0148861	0.0172771	0.00347132	0.0327352	0.0129215	0.00575848	0.00125605	0.00755707	0.0218737	0.0201132	0.00599493	0.00528709	0.00691031	0.0075905	0.0130918	0.00773769	0.011333	0.00590971	0.0313292	NA	0.0150606	0.0139999	0.0167515	0.0250016	0.0159662	0.0514	0.0218216	0.0192442	0.00685322	0.00807277	0.00960834	0.00480591	0.0111664	0.005778	0.0084204	0.0193219	0.0159683	0.0118026	0.00864961	0.0186609	0.0074214
ENSG00000079739	0.0099115	0.00522712	0.000755667	0.00757906	0.00779893	0.0103212	0.00243104	0.0040892	0.00863239	0.0063078	0.00804192	0.00776431	0.00487001	0.00958678	0.00358214	0.00429138	0.00920842	0.00913133	0.00617401	0.00237998	0.00361465	0.00481255	0.0039674	0.00688508	0.0082096	0.00590745	0.00726138	0.0106859	0.0112931	0.00406228	0.00645617	0.0143179	0.00933097	0.0119561	0.00818901	0.00739037	0.00332272	0.00953707	0.00523198	0.0037289	0.00841301	0.00376137	0.00325424	0.0101998	0.00527711	0.00369285	0.00472288	0.0085509	0.00316917
ENSG00000185483	0.0163241	0.00776237	0.00363714	NA	0.188475	NA	0.0275404	0.0110788	0.00906741	0.00601055	NA	0.0100952	0.011216	0.00946635	0.0216558	0.00479342	0.0097514	0.00916696	0.0154286	0.0372784	0.0502904	NA	NA	0.0101564	0.0206302	0.00708053	0.0122353	NA	0.00744058	0.0119975	0.0169505	0.0140203	0.0399897	NA	0.023429	0.00755633	NA	0.161226	NA	NA	NA	0.0182013	NA	0.00868701	0.0118124	0.0317316	0.0141787	0.00961845	0.00192718
ENSG00000223949	0.0381648	0.0162051	0.0244427	NA	0.234999	NA	NA	0.0191526	0.0120395	0.0125873	NA	0.0212509	0.0259792	0.0225666	0.0350468	0.0165914	0.0179856	0.0211934	0.0324846	0.0471516	NA	NA	NA	0.0190282	0.0399832	0.00618631	0.0177018	NA	0.0177978	0.0387074	0.0265557	0.0413852	0.0560163	NA	NA	0.0260245	NA	0.233487	NA	NA	NA	0.0295026	NA	0.016975	0.02407	0.0403759	0.0259665	0.0199146	0.0129709
ENSG00000158966	0.00772028	0.0175431	0.0103864	0.0225335	0.034895	0.0222837	0.0168809	0.0223216	0.0121335	0.0124604	NA	0.00490011	0.00769997	0.0170616	0.0181304	0.00689765	0.0134052	0.00656533	0.00642462	0.0069138	0.0131236	0.0115178	0.0375994	0.0145738	0.0100246	0.0219728	0.0313679	NA	0.00878584	0.00738585	0.0128079	0.00600597	0.00952733	NA	0.00342998	0.0118867	0.00777944	0.0119278	0.000673198	0.00809785	NA	0.0136183	0.0141521	0.00847651	0.00468716	0.00727565	0.00743536	0.00274361	0.00678047
ENSG00000162437	0.0238216	0.00910226	0.0069257	0.01347	0.00884049	0.0257661	0.0233777	0.00940422	0.00938803	0.0104512	NA	0.00919193	0.0146746	0.00406794	0.00928858	0.0072365	0.0125348	0.00840955	0.0106508	0.0130907	0.0127302	0.0103656	0.0215276	0.0103779	0.00669406	0.0188613	0.0132602	NA	0.0271087	0.0173601	0.0124544	0.029138	0.0164652	0.201394	0.0132269	0.0166915	0.0127256	0.00918524	0.0158247	0.0179509	0.021227	0.0115962	0.0161867	0.0161203	0.0170687	0.0115336	0.0099228	0.0147201	0.018027
ENSG00000162434	0.00731779	0.00423585	0.00431305	0.0090371	0.0191206	0.00691304	0.00761849	0.00450476	0.00441302	0.00525245	0.0113292	0.00750479	0.00619853	0.00719093	0.00526657	0.00483249	0.00481818	0.00434578	0.00845247	0.00327243	0.0100186	0.00572468	0.00563335	0.0059953	0.00543598	0.00257437	0.00373008	0.00833625	0.00750345	0.00782776	0.0075664	0.00833665	0.0115489	0.00477802	0.00491959	0.00344494	0.00753399	0.0225659	0.0096883	0.00480586	0.00568721	0.00674119	0.00529267	0.0108482	0.00434018	0.00411905	0.00681624	0.00612548	0.00641788
ENSG00000226891	0.0316793	0.0216612	NA	NA	0.017719	NA	NA	0.0115122	0.0128985	NA	NA	0.0187355	0.0256556	0.00969962	0.0476542	0.0049309	0.0320716	0.0220759	0.0174525	0.0116999	NA	NA	NA	0.00987319	0.00137877	NA	NA	NA	0.0152978	0.0349754	0.0366162	0.00493107	0.0152307	NA	0.0153004	0.0157221	NA	0.00307596	NA	0.0206908	NA	NA	NA	0.0305161	0.0022478	0.00060578	0.0184993	0.000465812	0.00141032
ENSG00000162433	0.040164	0.0464238	0.0250924	0.0199277	0.0122325	0.0163828	0.00661319	0.0624724	0.0557556	0.0116726	0.206885	0.0291479	0.0751743	0.12668	0.0207236	0.0256255	0.0342858	0.0141162	0.0368139	0.00440039	0.0118997	0.00786548	0.00920714	0.049009	0.0395778	0.0546666	0.045326	0.0618243	0.0257431	0.0237986	0.0622658	0.0785626	0.0253407	NA	0.07152	0.0436853	0.005372	0.00763763	0.00414657	0.0104331	0.0110609	0.0319121	0.055439	0.0471242	0.0280261	0.0276214	0.0342401	0.0356506	0.0344272
ENSG00000116675	0.0277502	NA	NA	0.0050726	0.00150675	0.00225559	0.0031914	0.0319852	0.0283425	0.0068266	NA	0.0288629	0.0267257	0.00750991	0.00797594	2.54197e-05	0.0240832	0.0142952	0.0377795	0.00473586	0.00396581	0.00166595	0.0053769	0.0154864	0.0169695	0.0224007	0.065314	NA	0.00864764	NA	0.0305259	0.0139817	0.0502072	NA	0.00583022	0.0257681	0.00168188	0.0010829	0.00138661	0.00388201	0.00457757	NA	0.0082227	0.0301687	NA	0.00246985	NA	0.0265195	NA
ENSG00000213625	0.00167629	0.00171516	0.00143843	0.0159608	0.00395144	0.00488006	0.0132519	0.00217079	0.00193379	0.00158275	0.00349979	0.00294265	0.0026731	0.00212327	0.00153882	0.0016568	0.0014919	0.00133251	0.00190002	0.0157547	0.0159861	0.00736493	0.0117049	0.00174734	0.00209869	0.00181829	0.00166669	0.00138598	0.00161742	0.00182496	0.00256425	0.00377718	0.00163558	0.0259103	0.00166974	0.00161298	0.0114461	0.0039608	0.0139918	0.0172141	0.00546448	0.000964187	0.00169077	0.00179284	0.00106507	0.00232712	0.00172028	0.00241589	0.001344
ENSG00000116678	0.015886	0.0104643	0.00533445	0.012408	0.0175544	0.00709963	0.0163496	0.0112914	0.0110743	0.0093572	0.0391551	0.0448539	0.0120898	0.0108824	0.00925198	0.00748148	0.0104249	0.0120122	0.0112966	0.00660645	0.00419783	0.0113177	0.0199815	0.00460638	0.0087695	0.0258813	0.0102933	0.0125328	0.0069621	0.0138038	0.0172471	0.0581074	0.011361	0.0850601	0.0206939	0.010273	0.0105166	0.0149373	0.00387449	0.0132068	0.0123738	0.0102809	0.0171829	0.00476073	0.0188448	0.00463075	0.00826636	0.00673576	0.00733196
ENSG00000184588	0.00838445	0.00768449	2.54197e-05	0.00365705	0.00208422	0.00541724	0.00425335	0.016929	0.0162181	0.00300872	0.00957389	NA	0.00719541	0.00376774	0.00846936	0.00482424	0.00763429	0.0125725	0.00390562	0.00106164	0.00506639	0.000700035	0.00682691	0.00688076	0.0122022	0.00810742	0.00888375	0.0089436	0.0169153	0.00579879	0.0141814	0.0060258	0.00621124	0.0115345	0.00796122	0.012634	0.00442859	0.00396826	0.00411768	0.00335073	0.00318898	0.0149064	0.00304079	0.00388161	0.00832625	0.00388916	0.00661465	0.000554008	0.013797
ENSG00000118473	0.012672	0.0090165	0.0072844	0.0043893	0.00605449	0.00698643	0.0110191	0.0140761	0.011875	0.00660661	NA	0.05091	0.0146904	0.0214107	0.00498002	0.00735164	0.0205229	0.0201014	0.0256519	0.00861876	0.00400645	0.00443189	0.00584159	0.0145094	0.013777	0.0846275	0.130786	0.0731553	0.0111431	0.0169398	0.0196964	NA	0.0117775	NA	0.00991323	0.0109032	0.00507977	0.00235203	0.00342287	0.00936156	0.00756266	0.0183902	0.00636237	0.00971971	0.0219555	0.0068575	0.0132851	0.018557	0.0117297
ENSG00000248458	0.0488371	0.014203	NA	NA	NA	NA	NA	NA	0.0914361	0.0150954	NA	NA	NA	NA	0.00872566	0.0303649	0.0496792	0.0262559	NA	NA	NA	NA	NA	NA	NA	NA	0.119276	NA	0.0850596	0.0703482	NA	NA	0.0235764	NA	NA	0.0475784	NA	NA	NA	0.0394918	0.00805896	NA	NA	0.0499212	NA	0.0307897	NA	NA	2.54197e-05
ENSG00000152760	0.220996	0.395023	NA	0.0884703	0.14354	0.102495	0.070506	0.195469	0.186991	0.144134	NA	NA	0.278722	0.264905	NA	0.222227	0.196277	0.195969	0.201455	0.0870102	0.140859	0.0826729	0.0488202	0.191321	0.24082	0.32641	0.170893	0.0859063	0.199134	0.224435	0.215093	NA	0.217643	0.87348	NA	0.304135	0.0856357	0.145319	0.0770735	0.10088	0.0469947	0.207402	NA	0.309797	NA	0.170025	0.102983	0.267309	0.169917
ENSG00000152763	0.0383627	0.0241407	NA	0.0100562	0.0207359	0.0342977	0.0448644	0.0314718	0.0108793	0.0282768	0.0385804	0.0303292	0.0310485	0.0398875	0.0142479	0.0214643	0.0215328	0.0135247	0.0297527	0.0187704	NA	0.000735065	NA	0.0171135	0.0258903	0.000144834	0.0302672	NA	0.0226518	0.00994026	0.0370157	0.0403549	0.0138772	NA	0.0187438	0.0290293	NA	0.0369275	NA	0.000186014	0.0556936	NA	0.00620966	0.0136741	0.00899085	0.00596954	0.00573633	NA	0.00123422
ENSG00000198160	0.116365	0.0843804	0.161786	0.0283529	0.070135	0.0415335	0.0797803	0.101609	0.153532	0.0770338	0.295536	0.0470108	0.0708582	0.159265	0.126949	0.0612949	0.0766494	0.235407	0.0991975	0.0640204	0.0470847	0.0333952	0.0684106	0.148833	0.14708	0.0796305	0.0865878	0.0930191	0.0867433	0.135116	0.0802293	0.060026	0.0819985	0.120532	0.137813	0.165661	0.0637508	0.0723562	0.045238	0.0355845	0.0555868	0.130268	0.0393462	0.0933359	0.0639889	0.0932565	0.06033	0.0892402	0.105593
ENSG00000116704	0.0134685	0.00996264	0.00517708	0.0321535	0.0163926	0.0740597	0.0687004	0.00608618	0.00731948	0.00591837	0.00737954	0.0122015	0.00884914	0.00228813	0.00125417	0.00857044	0.00422126	0.00791544	0.0225864	0.0197124	0.020602	0.0283463	0.0464593	0.00791128	0.0202823	0.0012614	0.0236312	0.00290414	0.00607651	0.00984519	0.00784831	0.0203541	0.0115154	0.103732	0.00623526	0.0137656	0.0514565	0.0146924	0.0331282	0.0193675	0.0656885	0.00981197	0.00567513	0.010445	0.00742257	0.0103669	0.0115735	0.0173596	0.00904412
ENSG00000081985	0.0513112	0.0597643	NA	NA	0.213411	0.0283471	NA	0.164203	0.116713	NA	0.0871226	0.0349418	0.0351284	0.0640129	0.0145624	0.0414988	0.0369605	0.0760367	0.0777336	NA	0.00829787	NA	NA	0.0812339	0.0891311	0.070276	NA	0.0422563	0.0895184	NA	0.0650657	0.0429823	0.0968904	0.0944819	NA	0.11473	0.0164329	NA	0.0185745	NA	NA	0.0464224	NA	0.0594547	NA	NA	NA	NA	NA
ENSG00000142864	0.00593667	0.00609069	0.000551516	0.00726708	0.00415546	2.54197e-05	0.00631892	0.00665888	0.00664471	0.00401928	0.000887048	0.00499659	0.00441878	0.00260377	0.00332546	0.0042204	0.00545311	0.00437972	0.0052991	0.00645057	0.0050102	0.00750721	0.00108437	0.0017801	0.0064074	0.00434059	0.00827405	0.016442	0.0108748	0.0055698	0.00949426	0.00870454	0.00450619	0.00941619	0.00110685	0.00389336	0.008787	0.00175838	0.00812338	0.00161399	0.0165504	0.00297527	0.00544412	0.0051322	0.00126214	0.00657447	0.00127144	0.0040879	0.00380119
ENSG00000116717	0.0226521	0.0170087	NA	2.54197e-05	NA	0.0151876	0.0226856	0.0440536	0.0138486	0.0280838	0.030925	0.0314801	0.0213798	0.00947695	0.0225693	0.0159328	0.0150593	0.0114582	0.0213574	0.00388861	0.00490935	2.54197e-05	NA	0.0201152	0.0196107	0.00927767	0.0105643	0.0115829	0.0244089	0.0302464	0.0155392	0.005259	0.00965177	0.0206794	2.54197e-05	0.0154531	2.54197e-05	NA	0.00471817	2.54197e-05	NA	0.0135005	2.54197e-05	0.0194936	0.0480019	0.0132517	0.0517838	0.0121235	0.041618
ENSG00000172380	0.00344678	0.00351972	0.00566321	0.00961632	0.0245695	0.0150373	0.00808461	0.00629571	0.00595258	0.00651714	NA	0.006083	0.00308425	0.00363448	0.0056793	0.00394463	0.00352735	0.00403193	0.00263159	0.0107043	0.0045824	0.0549103	0.0164718	0.00297303	0.00517929	0.00613892	0.0164672	0.00762658	0.00527356	0.00433651	0.00319684	0.00697194	0.00273979	0.209859	0.00191299	0.00428346	0.0116891	0.00603775	0.00706831	0.0243094	0.0119413	0.00626907	0.00216146	0.00511066	0.00433683	0.00663081	0.00405273	0.00447053	0.00308362
ENSG00000232284	0.00548878	0.00538884	0.00474462	0.0246891	0.00739621	0.00774394	0.0235436	0.00488718	0.00683502	NA	NA	0.0238926	0.00298213	0.00357984	0.0194799	0.00795842	0.00703984	0.00431426	0.00695596	0.0183329	0.00442184	NA	0.00478768	0.00837607	0.00808371	NA	0.0245687	0.0261879	0.00526515	0.00506598	0.00363424	0.00518861	0.0122712	0.127119	0.0293743	0.00508602	0.00394695	0.00175932	0.00513802	0.148666	0.0136729	0.00566498	0.00430168	0.00506581	0.0414327	0.170492	0.00375967	0.00432567	0.00527484
ENSG00000116729	0.00600278	0.00424104	0.00457288	0.00309709	0.00594382	0.00397093	0.00237331	0.00512748	0.00697406	0.00513014	NA	0.00248254	0.00258053	0.00328996	0.0222627	0.00407744	0.00560493	0.00398654	0.00482245	0.00229636	0.00298629	0.00633617	0.00377541	0.00910721	0.00765414	0.00826338	0.00368003	0.0110567	0.00440695	0.00447714	0.00318973	0.0053562	0.00834113	0.126338	0.00450806	0.00468527	0.00224577	0.00120365	0.00352209	0.00202466	0.00580958	0.00555221	0.00287121	0.00396352	0.00543157	0.00709087	0.00212313	0.00364866	0.00410989
ENSG00000033122	0.0136147	0.0132861	NA	0.00783425	0.00862393	0.010711	0.00619167	0.044506	0.0130779	0.0533714	0.00604831	0.0516422	0.0138955	0.0125335	0.0252809	0.00223173	0.00819011	0.0116463	0.0202748	0.00357315	0.00342664	0.00281778	0.0089121	0.0227866	0.0202548	0.0123241	0.0281984	0.00641011	0.0202914	0.050454	0.0335915	0.0201258	0.0426862	NA	0.0189228	0.020208	0.00446886	0.0172355	0.00622341	0.00457655	0.0200451	0.0259803	0.050844	0.0119546	0.00948921	0.0229955	0.0039402	0.0351289	0.00229626
ENSG00000066557	0.0110751	0.0196391	NA	0.00497785	0.00102995	0.0078085	0.0196235	0.0235797	0.0087816	2.54197e-05	0.00233301	0.0281681	0.0103446	0.00344179	0.0200855	0.0107185	0.00595573	0.017582	0.0202109	0.00557014	0.0080652	0.0116062	0.0071992	0.00596513	0.0165294	2.54197e-05	2.54197e-05	0.0109776	0.0135654	0.0186519	0.0349918	0.0225351	0.0086581	NA	0.0195836	0.018769	0.00212245	0.0151848	0.0193499	0.0109141	0.0248808	0.00789974	0.0449824	0.0232704	0.0091897	0.0158064	0.00663983	0.0209904	0.000287582
ENSG00000116754	0.00386968	0.00678772	NA	0.0310972	0.0211886	0.0225312	0.0216593	0.00527642	0.00607394	0.00654608	0.00608984	0.00210266	0.00341686	0.00682377	0.00373072	0.00679966	0.00918828	0.00979496	0.00591517	0.0220024	0.0144205	0.0335308	0.0408969	0.00511178	0.0124358	0.002147	0.00782424	0.0050142	0.00718974	0.0120191	0.00855094	0.0089631	0.00634038	0.038294	0.00732115	0.0066793	0.038987	0.0124788	0.0147799	0.0294025	0.0186631	0.00565434	0.0127043	0.00905762	0.00368499	0.00885024	0.00489845	0.00281164	0.00458741
ENSG00000118454	0.0183248	0.0168359	NA	NA	0.0429567	NA	0.0141479	0.0205074	0.011127	0.0116979	0.00518816	0.00514444	0.0189665	0.0108277	0.0140196	0.0280722	0.0158339	0.0178473	0.0234774	0.0122351	0.0408559	0.0276957	NA	0.00839793	0.0162477	0.00252878	NA	NA	0.0172708	0.03074	0.0236057	0.0107548	0.0202289	NA	0.0239467	0.00925094	0.0159037	0.0370454	0.0317418	0.0165025	0.0512189	0.0225908	NA	0.0189622	0.0146978	0.051767	0.00699025	0.0232082	0.00170324
ENSG00000197568	0.181256	0.151016	NA	0.190182	0.0406129	0.15447	0.190714	0.0878124	0.127318	0.127493	0.16029	0.135067	0.226232	0.158426	0.0275524	0.140651	0.167746	0.144697	0.164771	0.082414	0.188009	0.194437	0.374283	0.135101	0.184304	0.0705795	0.078132	0.0799969	0.0796316	0.0793681	0.161272	0.0882466	0.0655313	NA	0.0990415	0.332095	0.212831	0.0775033	0.164995	0.163853	0.0387764	0.131419	NA	0.206433	0.0636827	0.0301105	0.130983	0.171117	0.0659998
ENSG00000116761	0.0279113	0.0149247	NA	0.00711779	0.04325	0.0213471	0.0318101	0.0254629	0.0341452	0.0158751	0.0388412	0.0141526	0.030988	0.00859082	0.0155374	0.0191682	0.0102647	0.024668	0.0157179	0.0132307	0.00638247	0.0272384	0.0367988	0.00848766	0.0297249	0.0288689	NA	0.0022489	0.00794992	0.00882145	0.0496089	NA	0.0103855	NA	0.00423508	0.00506504	0.011138	0.00616698	0.0174272	0.00539486	0.0831618	0.035202	0.0108473	0.0196349	0.00386095	0.0144787	NA	0.0057224	0.00238124
ENSG00000050628	0.0102401	0.00466295	0.0181277	0.0142198	NA	NA	NA	0.00624323	0.0148032	0.0156662	NA	0.0419484	0.028614	0.0104851	0.0325544	0.00926803	0.00772008	0.0121666	0.010496	NA	NA	0.0142072	NA	0.00644978	0.0154654	NA	NA	NA	0.02383	0.0626684	0.0375879	NA	0.0603263	NA	0.0235796	0.00574169	0.099055	NA	0.233959	NA	0.104678	0.026335	0.0126085	0.0618031	0.037689	NA	0.0169893	0.00712723	0.00265653
ENSG00000235782	0.0651195	NA	NA	NA	NA	NA	NA	NA	NA	NA	NA	NA	NA	NA	NA	NA	0.0893143	NA	NA	NA	NA	NA	NA	NA	NA	NA	NA	NA	NA	NA	NA	NA	NA	NA	NA	NA	NA	NA	NA	NA	NA	NA	NA	NA	NA	NA	NA	NA	NA
ENSG00000269933	0.0690872	0.0547971	NA	0.0414853	NA	NA	NA	NA	NA	NA	NA	NA	NA	NA	NA	NA	0.0223794	NA	0.0322412	NA	NA	0.00662595	NA	NA	NA	NA	NA	NA	NA	NA	NA	NA	NA	NA	NA	0.0661869	NA	NA	NA	NA	NA	NA	0.0262767	NA	NA	NA	NA	0.0267397	0.00291681
ENSG00000132485	0.0063138	0.00543554	0.0163012	0.00786852	0.00871403	0.00662227	0.00743608	0.00581671	0.00530539	0.00667069	0.00645513	0.0083784	0.00590017	0.00638975	0.00620758	0.00478599	0.00815839	0.00540697	0.00714684	0.0124407	0.00885871	0.00639605	0.0115876	0.00613511	0.00541258	0.00423667	0.008999	0.00892112	0.00746598	0.0103893	0.00625466	0.00762109	0.00741569	0.028537	0.00702855	0.00562815	0.0084396	0.00461514	0.0108148	0.00967781	0.00512502	0.00888448	0.0128064	0.00631154	0.00493201	0.00797001	0.00367575	0.00449648	0.00528056
ENSG00000229956	0.00734835	0.0298392	NA	0.014576	0.00969099	0.0675257	NA	0.016511	0.00840225	0.0119467	NA	NA	0.0888108	0.0140381	0.00834996	0.0388861	0.0283645	0.0257755	0.0433624	0.0450999	0.0181646	0.0190693	NA	0.0101599	0.00565421	0.0133624	NA	NA	0.0198685	0.0569123	0.0528013	NA	0.0174367	NA	NA	0.0166017	0.00822569	0.0219204	0.00476222	0.00377416	0.0231951	NA	NA	0.0168281	0.0139599	0.0205624	NA	0.0289462	2.54197e-05
ENSG00000172260	0.0124702	0.0241365	2.54197e-05	0.0128769	0.0102554	0.0231427	0.0238914	0.0173392	0.00751832	0.00837589	NA	NA	0.0117875	0.0156056	0.0109746	0.0145455	0.0139361	0.0222102	0.0295124	0.0266342	0.0124148	0.0107815	0.0215513	0.0201761	0.01031	0.00835293	0.0274352	NA	0.00837432	0.0437886	0.0285473	NA	0.0299666	NA	NA	0.0225309	0.015913	0.00462984	0.01082	0.00955086	0.0236094	NA	NA	0.0263291	0.000906484	0.020882	0.0334573	0.0119952	0.0195224
ENSG00000254685	0.0213401	0.0264247	0.00813426	0.0320044	0.0507498	0.0308882	0.0339039	0.0261231	0.0327008	0.0249632	0.0212304	0.0229391	0.0266092	0.0278133	0.0126048	0.0215212	0.0290381	0.0269896	0.0266839	0.0270208	0.035099	0.0249884	0.0227155	0.0241799	0.0349194	0.0183898	0.0230157	0.0224119	0.0197741	0.0324375	0.027059	0.0221607	0.0258279	0.0723427	0.0206688	0.0332763	0.036368	0.0506114	0.0316417	0.0273009	0.0298503	0.0186687	0.0167365	0.0376328	0.0308662	0.0238687	0.0276967	0.0255378	0.0362407
ENSG00000116783	0.0571359	0.0719853	NA	NA	0.016195	0.0398114	NA	0.0418395	0.0536585	0.013767	NA	NA	0.0541455	0.0328651	0.0287032	0.0600109	0.132487	0.0777899	0.0445152	NA	0.0359299	0.0409361	0.090334	0.0392475	0.0649861	NA	0.00668939	NA	0.0285908	0.0880568	0.0677573	0.12765	0.0498632	NA	NA	0.0531133	0.0389717	0.0230017	0.0417997	0.0266163	0.0571851	NA	NA	0.060544	0.0334753	0.0425039	NA	0.0502803	0.0339032
ENSG00000237324	0.0684652	0.0670711	NA	NA	0.0367773	NA	NA	NA	0.0312006	0.0497386	NA	NA	0.0608247	NA	0.010339	NA	NA	0.129619	0.0687093	NA	NA	NA	NA	NA	0.0533781	NA	0.0414684	NA	0.0557792	NA	0.0883362	NA	0.0512518	NA	NA	0.0637734	NA	0.0322908	NA	NA	NA	NA	NA	NA	NA	NA	NA	NA	NA
ENSG00000116791	0.0964247	0.0674418	0.0582468	0.0978816	0.0818061	0.0828781	0.0867069	0.0397149	0.0393527	0.0747266	0.0590147	0.0192119	0.109105	0.030051	0.0452114	0.0550448	0.0842602	0.0676297	0.0749311	0.0867161	0.0843346	0.0760856	0.0866885	0.0471039	0.040219	0.151449	0.0810001	0.0333586	0.073996	0.0443626	0.141454	0.0652981	0.0404069	0.162517	0.0935835	0.0767878	0.104942	0.0985975	0.0897196	0.101902	0.085297	0.0831481	0.0215383	0.0836266	0.0600825	0.0762092	0.0661633	0.0229517	0.0394185
ENSG00000162623	0.00783548	0.00656596	0.00773788	0.024791	0.011812	0.0165913	0.0116701	0.0067133	0.00582873	0.0135555	0.00488248	0.0100717	0.00853095	0.00281465	2.54197e-05	0.00197368	0.00791608	0.00652353	0.00561393	0.0125075	0.0125351	0.0121389	0.0121825	0.00767522	0.00587356	0.00633635	0.015331	0.00706582	0.00511488	0.00630439	0.00769134	0.00576585	0.00721869	0.0548019	0.00483705	0.0053876	0.0134586	0.0189572	0.0121687	0.012974	0.00717942	0.00502837	0.00388839	0.00617964	0.00321056	0.00698658	0.00565728	0.00753594	0.00464575
ENSG00000117054	0.00600713	0.00782197	0.0045939	0.00319088	0.0276124	0.00541447	0.00725892	0.00655715	0.00742497	0.0179704	0.00311612	0.00407108	0.0137287	0.00322054	0.00359	0.00590472	0.00450022	0.00526661	0.00515505	0.00221819	0.0062265	0.0017775	0.00263021	0.00956076	0.0082146	0.00297193	0.0176402	0.01066	0.00578166	0.00684951	0.0207697	0.0048393	0.00543934	0.0303379	0.00832447	0.00483436	0.00613231	0.0339778	0.00501172	0.00492257	0.00465415	0.00731476	0.0170334	0.00527979	0.00370207	0.00412112	0.00677502	0.0165923	0.0099876
ENSG00000137955	0.00660689	0.00849713	0.00515856	0.0172664	0.0128444	0.000360079	0.018107	0.00482566	0.00634141	0.0058648	0.00383117	0.00205669	0.00524939	0.00410827	0.00377364	0.00443719	0.00490847	0.00657667	0.00494163	0.00257472	0.00931689	0.00402068	0.0151049	0.00525117	0.00972213	0.00313428	0.00999146	0.000795199	0.00663971	0.00925236	0.0100603	0.00690904	0.00542902	0.0253534	0.00236283	0.00740059	0.0166782	0.0137406	0.00556848	0.00740951	0.0106013	0.00576837	0.0109304	0.00430138	0.00228425	0.00316653	0.00288664	0.0071964	0.00471295
ENSG00000057468	0.192186	0.132135	0.200072	NA	0.0319484	0.0863641	NA	0.17992	0.193142	0.194428	0.149144	NA	0.221568	0.144919	0.0156699	0.125059	0.197114	0.167322	0.194128	0.0733579	0.100959	0.0687048	NA	0.187948	0.188346	0.218855	0.179673	NA	0.136654	0.192022	0.277475	0.204202	0.204468	NA	NA	0.136848	0.0750439	0.0422659	0.0833756	0.068481	NA	0.204661	NA	0.145511	0.0803649	NA	0.187953	0.138478	0.0837595
ENSG00000184005	0.00419464	0.00997502	0.0186832	0.0161067	0.003503	0.0152901	0.0127883	0.007441	0.00394717	0.00383186	NA	0.0511767	0.011468	0.00566143	0.00591412	0.00411364	0.00326342	0.00369841	0.00389603	0.0101459	0.00728736	0.00435486	0.00970826	0.0272116	0.00908917	NA	0.00360203	0.018345	0.00720748	0.0132849	0.01868	0.0024865	0.00840542	0.0150392	0.00181301	0.010335	0.00491857	0.00847202	0.00383499	0.00517452	0.00536044	0.0128661	0.0109983	0.00427602	0.0147599	0.00440528	0.0124209	0.00823831	0.000814115
ENSG00000142892	0.00901627	0.00873473	0.0201583	0.00883531	0.000635119	0.00921691	0.0127007	0.0128277	0.00712237	0.0118199	0.000863752	0.0158147	0.01222	0.0102073	0.00316959	0.014973	0.00835638	0.0079431	0.0112645	0.005606	0.00561565	0.00693957	0.00684291	0.00818118	0.0089443	0.00152944	0.00636331	0.00327641	0.00636609	0.0262777	0.0214901	0.00523311	0.00906075	0.0228343	0.00374746	0.00857645	0.0140187	0.005049	0.00513741	0.00714397	0.00251415	0.00678934	0.00484639	0.0097901	0.0107669	0.0134809	0.0114092	0.00372701	0.00751245
ENSG00000154027	0.0755137	0.0426795	NA	0.0152251	0.0252822	0.0170872	0.0275345	0.0205808	0.0351983	0.0493965	NA	NA	0.051708	0.021717	0.00769564	NA	NA	0.0172373	0.0213504	0.0250696	0.014437	0.0106221	0.0152292	0.0441987	0.0250015	0.0140713	NA	NA	0.0124383	0.0731917	NA	0.0700222	NA	0.266687	NA	0.0351186	0.014815	0.0175045	0.0140905	0.0163945	0.0142658	NA	NA	NA	NA	0.0207164	0.0125443	0.0139912	NA
ENSG00000036549	0.0128606	0.0101988	0.00902808	0.0446208	0.0115039	0.0367473	0.0177384	0.011217	0.00809614	0.0163055	0.00991116	0.0135418	0.00767909	0.0042865	0.000135634	0.00835858	0.011242	0.013708	0.0112387	0.0240699	0.0203472	0.0273763	0.0259838	0.00911707	0.00231536	0.000682727	0.0225199	0.0108171	0.00990193	0.00894984	0.0109496	0.0121409	0.00449257	0.0642176	0.00339267	0.0076695	0.0455113	0.00381021	0.0159565	0.0260965	0.0306802	0.00803311	0.000481134	0.00781277	0.0157796	0.0098381	0.00367784	0.0107217	0.00204582
ENSG00000077254	0.00794186	0.0109911	0.013861	0.0153664	0.00425913	0.0222989	0.0105136	0.00880016	0.0102439	0.00531918	0.00357532	0.0150859	0.0065244	0.00515753	0.00371276	0.00312245	0.0104108	0.00628082	0.0053608	0.00488114	0.00575683	0.00611842	0.0234412	0.00524759	0.00909163	0.00761345	0.00587729	0.0187474	0.00743008	0.00351506	0.00867289	0.00409102	0.00474791	0.0336781	0.00946633	0.00804234	0.00677396	0.00403214	0.0101885	0.000872559	0.0107387	0.00739122	2.54197e-05	0.00964464	0.0101297	0.0049059	0.00161615	0.00462028	0.00375188
ENSG00000180488	0.0298878	0.0261544	NA	0.0118888	0.00634109	0.0773562	0.038597	0.0609394	0.0199376	0.0240515	0.00427531	0.0275293	0.0371619	0.0247429	0.00791464	0.0167414	0.0329201	0.00938363	0.0530016	0.00297427	0.0103461	0.00765082	0.017331	0.0161177	0.0117056	0.021437	0.0759942	NA	0.0273471	0.050738	0.0575609	0.0127074	0.0282301	NA	0.0188469	0.043294	0.0150251	0.0273037	0.00776938	0.0228855	0.00459537	0.0106336	NA	0.0334791	0.00733451	0.0293544	0.0230373	0.0201883	0.0298748
ENSG00000162614	0.0233427	0.0103991	0.00252288	NA	NA	NA	NA	0.0136585	0.0200488	0.0115667	NA	0.0146925	0.0150697	0.0190014	0.00627481	0.0128826	0.0139357	0.0150975	0.0164456	NA	NA	NA	NA	0.0173621	0.0158279	0.0105952	0.0239862	NA	0.0219994	0.0258369	0.0357066	0.0611142	0.0183106	NA	0.0181211	0.00959081	NA	NA	NA	NA	NA	0.0278652	NA	0.0163142	2.54197e-05	NA	0.0170143	0.011871	0.0219833
ENSG00000162613	0.00778091	0.0104179	0.00888077	0.012962	0.00547439	0.00742931	0.0154947	0.00325931	0.00528013	0.0069159	0.00414559	0.00425373	0.00429619	0.0055842	0.0049728	0.00326435	0.00636664	0.00301049	0.00731418	0.0243105	0.0179488	0.0175728	0.0204336	0.00342862	0.00572893	0.0060721	0.00916534	0.0145293	0.00790787	0.0108313	0.0160932	0.00566451	0.00551961	0.0206352	0.00231687	0.00768864	0.0190026	0.00886858	0.0149913	0.00713819	0.0102509	0.00877333	0.0107461	0.0064794	0.00219875	0.00515142	0.00441258	0.00494451	0.0108192
ENSG00000162616	0.0125424	0.00900048	0.0148354	0.0171712	0.0114521	0.00781495	0.0176602	0.00575455	0.00791357	0.00910177	0.024812	0.0149745	0.0053464	0.000159655	0.00200564	0.0126285	0.00699546	0.0110753	0.0105512	0.00954701	0.0138298	0.00769506	0.0125656	0.00597032	0.00744836	0.00847542	0.00780218	0.0115772	0.00992412	0.0062684	0.0228936	0.0075519	0.0109426	0.0509177	0.0055056	0.00862301	0.027842	0.0158841	0.0108264	0.0125695	0.0133197	0.0127161	0.0242662	0.0126917	0.00359952	0.00721122	0.015279	0.0111494	0.00845531
ENSG00000137960	0.031115	0.0393217	0.00974085	NA	NA	NA	NA	0.0316611	0.074707	0.034678	NA	0.0233726	0.061082	0.0345721	0.0154146	0.0451161	0.0333318	0.0466882	0.0381594	NA	NA	NA	NA	0.0291609	0.0702253	0.031492	0.048046	0.0587133	0.0453654	0.0518521	0.056423	0.044845	0.0369068	NA	0.0397358	0.0653751	NA	NA	NA	NA	NA	0.0512139	0.0453745	0.0433416	0.0556693	0.0424981	0.0349796	0.0403915	0.0265177
ENSG00000273338	0.0305082	NA	NA	NA	NA	NA	NA	0.025732	0.000326696	NA	NA	NA	0.0118519	0.0131228	NA	2.54197e-05	0.00720714	NA	0.02106	NA	NA	NA	NA	0.0162344	NA	NA	NA	NA	0.00888387	NA	0.00407508	0.0217294	0.0448565	NA	NA	0.0123986	NA	NA	NA	NA	NA	0.00908421	NA	0.00555615	2.54197e-05	NA	0.00147779	NA	NA
ENSG00000237413	0.120674	NA	NA	NA	NA	NA	NA	NA	NA	NA	NA	0.0327116	NA	NA	NA	NA	0.110171	NA	NA	NA	NA	NA	NA	NA	NA	0.0850872	NA	0.0739918	0.0724148	NA	NA	0.0513651	NA	NA	NA	NA	NA	NA	NA	NA	NA	NA	NA	0.0372439	NA	NA	NA	NA	NA
ENSG00000122420	0.0283058	0.0327788	0.00853035	NA	NA	0.0276499	NA	0.0495255	0.099238	0.02436	NA	0.0291934	0.0277719	0.0147895	0.0270416	0.0276266	0.0293785	0.0305801	0.0197556	NA	NA	0.00753782	NA	0.0249353	0.0414935	0.0340275	0.0326709	0.0768861	0.0354563	0.0484195	0.023007	NA	0.0511649	NA	0.122427	0.0330934	NA	NA	NA	NA	NA	0.0343025	0.029759	0.0255504	0.0465491	0.0495195	0.0215303	0.0199913	0.00858027
ENSG00000137959	0.0102366	0.0113759	2.54197e-05	0.0226427	0.0326435	0.0333655	0.00630264	0.00811982	0.00960708	0.0145018	0.014593	0.0307657	0.0344404	0.00670972	0.0127541	0.00660584	0.010414	0.0154476	0.0187781	0.0228662	0.00887084	0.0387914	0.0236313	0.00825553	0.00776578	0.0273832	0.00707927	0.0341272	0.00930174	0.0221953	0.0247944	0.00524498	0.0113656	0.0186324	0.00940101	0.0109254	0.0203616	0.0130843	0.0185837	0.0257416	0.0254426	0.0260375	0.00216075	0.0122829	0.00716571	0.0100638	0.00576392	0.00575061	0.00752929
ENSG00000137965	0.0266832	0.0432767	0.0232251	0.0363458	0.0386483	0.0489924	0.0452788	0.0372998	0.0362131	0.0386876	0.0280448	0.0343559	0.0498761	0.0358518	0.0479711	0.0541516	0.0395296	0.0498893	0.029198	0.0496785	0.0295831	0.0555066	0.0463502	0.0396088	0.0472582	0.0282681	0.0379625	0.0275792	0.031324	0.0528673	0.044223	0.0309189	0.0583689	0.0504806	0.043304	0.0477014	0.0408665	0.0422406	0.0377283	0.0539649	0.0320652	0.0506421	0.0496846	0.0287483	0.0558605	0.0693998	0.0587872	0.0425989	0.0612898
ENSG00000162618	0.00638974	0.0097324	2.54197e-05	0.0188394	0.0118729	0.0176696	0.0128509	0.00736583	0.00699126	0.00516318	NA	0.0117205	0.0154236	0.00648027	2.54197e-05	0.00932882	0.00546772	0.00489018	0.00747497	0.00161361	0.0142945	0.0103413	0.00244999	0.0106911	0.0101095	0.0258953	0.00292863	0.0187421	0.0112853	0.00705326	0.0133291	0.00376037	0.00487099	NA	0.00363242	0.00934255	0.0228555	0.0259329	0.0195708	0.00254342	0.0102785	0.0069751	2.54197e-05	0.00905481	0.0112432	0.00990266	2.54197e-05	2.54197e-05	0.0117835
ENSG00000117114	0.00529098	0.00558113	0.0058131	0.0221537	0.0907119	0.0234472	0.00730464	0.00299407	0.00529545	0.00616841	NA	0.0385296	0.00590169	0.00437799	0.0184623	0.00496305	0.00852662	0.00602899	0.00771999	0.0205297	0.00835988	0.00989231	0.0276549	0.0146727	0.00660282	0.0156168	0.00601329	0.00683503	0.00936841	0.00275784	0.0112708	0.00429315	0.00323292	NA	0.00735164	0.012267	0.0140524	0.0660458	0.00947137	0.0109124	0.0135438	0.00469066	0.00542162	0.00400166	0.00922804	0.0117505	0.00435997	0.00393506	0.0134446
ENSG00000137941	0.0106516	0.00423416	0.0166586	0.00309913	0.00298011	0.00398152	0.00255061	0.0115619	0.0052156	0.0228561	NA	0.00606388	0.0157498	0.00901198	0.0102373	0.00882227	0.0146222	0.00243501	0.0220489	0.00477893	0.00273236	0.00177311	0.00779846	0.00344924	0.00670667	0.023395	0.0533376	0.0555252	0.00938563	0.0118433	0.0285357	0.0563346	0.0291533	NA	0.035637	0.00269997	0.00402225	0.00381044	0.001923	0.0058743	0.00397589	0.0152517	0.0457201	0.00761796	0.0182739	0.00582353	0.00900877	0.00712196	0.0135082
ENSG00000271576	0.0274281	0.00862871	NA	NA	0.00166057	0.0399098	NA	0.0211701	0.0194044	NA	NA	NA	NA	NA	0.00284736	NA	NA	0.0316776	NA	NA	NA	NA	NA	0.0103334	0.0161386	0.00687823	NA	NA	0.0230091	0.0223756	NA	NA	0.0194242	NA	NA	0.0442824	NA	0.0173486	NA	0.000666359	NA	NA	NA	NA	0.00720636	0.00429317	NA	0.0160651	0.0146047
ENSG00000142875	0.0162945	0.0102574	0.0129784	0.00504896	0.00160422	0.00984194	0.00127322	0.00697148	0.00452041	0.00834608	0.0133075	0.0115206	0.0288108	0.0081382	0.00709015	0.0128218	0.0150298	0.0069968	0.0117303	0.00584162	0.00313389	0.0066421	0.00555383	0.00389362	0.00469754	0.00379685	0.000520925	0.0144355	0.0094465	0.0128346	0.0389488	0.0100352	0.00976466	0.0335208	0.00202712	0.00771515	0.00223747	0.00250045	0.00348459	0.00223064	0.00317815	2.54197e-05	0.00655263	0.00969772	0.00859837	0.00639088	0.00341557	0.00675824	0.00406141
ENSG00000137976	0.0397901	NA	NA	NA	NA	NA	NA	NA	NA	NA	NA	NA	NA	NA	NA	NA	NA	NA	NA	NA	NA	NA	NA	NA	NA	NA	NA	NA	NA	0.893867	NA	NA	NA	NA	NA	NA	NA	NA	NA	NA	NA	NA	NA	0.0512928	NA	NA	0.577911	NA	NA
ENSG00000117133	0.00407524	0.00494021	0.0165563	0.0219446	0.0119978	0.0112254	0.0146602	0.00467539	0.00223376	0.00342427	0.00239457	0.00908186	0.00517024	0.0026723	0.00317505	0.00716613	0.00607087	0.00741228	0.00395443	0.00415918	0.0151033	0.00314597	0.0150949	0.00551323	0.00479349	0.0021112	0.0019276	0.0067594	0.0122307	0.00639521	0.00875551	0.00298595	0.00864552	0.0103924	0.00783439	0.00717722	0.0383381	0.0197283	0.0131777	0.00974511	0.0174633	0.0061407	0.00575128	0.0131698	0.0128195	0.0123077	0.00835515	0.00478269	0.0202063
ENSG00000174021	0.00413672	0.0169799	0.00476978	0.00657494	0.00150058	0.0108997	0.00333516	0.00510647	0.0247038	0.0224601	0.00178388	0.0195567	0.00485989	0.00485767	0.00408925	0.00362582	0.0167262	0.0297238	NA	0.00771876	0.00697546	0.00338961	0.0040084	0.00348236	0.024677	0.00436925	0.0525333	0.00618246	0.0235251	0.0068035	0.00635067	NA	0.0205559	NA	0.00401328	NA	0.00596852	0.00478786	0.00647941	0.00660325	0.00976826	0.0167369	0.0105939	0.00508482	0.0074125	0.00736801	0.0355477	0.0258826	0.0260116
ENSG00000122432	0.0109773	0.012806	0.0266452	0.0117076	0.00740383	0.0184203	0.0148055	0.0111174	0.0104557	0.00723863	0.0021595	0.0115085	0.0115113	0.00635145	0.0305547	0.00939242	0.00879413	0.00736991	0.0125537	0.0148632	0.0122704	0.012056	0.00233406	0.00560983	0.0128501	0.00527184	0.00839958	0.00863243	0.0112174	0.00917276	0.0126202	0.00558531	0.0101087	0.00468412	0.00929008	0.0119674	0.00501578	0.00352122	0.0136588	0.00489693	0.00576951	0.010406	0.00654074	0.00927384	0.00830816	0.00689793	0.00732513	0.0127601	0.00410535
ENSG00000117151	0.0137712	0.0185173	0.0268569	0.0138427	0.00599319	0.0151541	0.020668	0.0151499	0.0121075	0.00897344	0.00273982	0.016508	0.016996	0.0106846	0.018618	0.00935754	0.0102533	0.0105918	0.012961	0.00827857	0.0121152	0.00826934	0.00577895	0.00821458	0.0139955	0.00770123	0.00917288	0.00967916	0.0132178	0.00889526	0.0141978	0.0101643	0.0128204	0.0078228	0.0133301	0.0152089	0.00279429	0.00989634	0.025015	0.00876141	0.00641051	0.01214	0.00649403	0.0121196	0.0112502	0.00834433	0.0101591	0.0188142	0.00878752
ENSG00000117155	0.0342186	0.0160617	0.0135519	0.00196268	0.00105782	0.00790874	0.00298515	0.00749716	0.0030197	0.00685812	0.00929881	0.00221444	0.00914714	0.0036597	0.000837642	0.00379304	0.029146	0.0102637	0.0361039	0.00299066	0.00331097	2.54197e-05	2.54197e-05	0.00507592	0.00327237	0.0034168	0.0140241	0.0128305	0.0164762	0.0124559	0.0187158	0.00241117	0.0127998	0.0354141	0.0157538	0.0240723	0.00128911	0.0018655	0.00322275	0.0014198	0.0151889	0.00603953	0.00657591	0.0142843	0.007274	0.00396721	2.54197e-05	0.0149147	0.00548942
ENSG00000153898	0.165467	0.331301	NA	NA	NA	NA	NA	0.163192	NA	0.192949	0.0303017	0.750509	0.0650554	0.0379686	0.0521137	0.108474	0.0630902	0.0876088	0.175031	NA	NA	NA	NA	0.359609	NA	0.893867	NA	NA	0.0576479	0.248222	0.0774742	0.0324199	0.253301	0.0285446	0.143446	0.269138	NA	NA	NA	NA	NA	0.104613	NA	0.0618524	NA	0.200369	0.18887	0.297051	0.326182
ENSG00000162643	0.0287849	0.0542794	NA	0.100185	NA	0.0957578	NA	0.0270978	0.0264941	0.012201	0.0453408	0.0115413	0.00926353	0.0500097	0.00688092	0.0115229	0.0154966	0.111019	0.0186991	0.0518574	NA	0.0301732	NA	0.0543106	0.0263335	0.0506812	0.139122	NA	0.0337279	0.0510564	0.00932687	0.37485	0.153748	NA	0.00530681	0.145635	NA	NA	NA	0.442593	NA	0.0373441	0.0258833	0.0295203	0.0519684	0.0263898	0.101725	0.0250921	0.0430616
ENSG00000055732	0.0327043	0.0565996	NA	NA	NA	0.228198	NA	0.0306098	0.0293401	0.0130734	0.0454643	0.012424	0.0102296	0.054399	0.0273661	0.0116442	0.0163203	0.13722	0.0189542	NA	NA	NA	NA	0.0637679	0.0286274	NA	0.252742	NA	0.0405063	0.0486358	0.00856223	0.475663	0.207028	NA	0.00682874	0.153818	NA	NA	NA	0.893867	NA	0.0468858	0.0339369	0.0366099	0.0447999	0.0288644	0.115152	0.0284874	0.0388312
ENSG00000097096	0.0140402	0.0126287	0.00269314	NA	NA	0.0152218	NA	0.00635826	0.00892803	0.0106726	0.175362	0.00660222	0.0161046	0.00649753	0.010846	0.0015264	0.00901932	0.0186754	0.0164879	0.0285198	0.0176195	0.00263241	NA	0.00600229	0.011224	0.01526	0.0135546	0.00826239	0.00923767	0.0163658	0.0201963	0.0157297	0.0115847	NA	0.0317127	0.0134846	0.0138216	NA	0.00381445	0.0191841	NA	0.00725835	2.54197e-05	0.0145245	0.00323308	0.00420728	0.00101926	0.0116882	0.00425484
ENSG00000162642	0.00427673	0.00573391	0.00614946	0.00601899	0.00711976	0.01245	0.004739	0.00344359	0.00172434	0.00398932	0.00423555	0.00331656	0.00526999	0.00387254	0.00476871	0.0045977	0.00527845	0.00740096	0.00494599	0.00366232	0.00223077	0.00392571	0.014533	0.00382254	0.00306364	0.00222013	0.00483848	0.0063119	0.00610762	0.00642641	0.00871795	0.00693569	0.00592792	0.0160135	0.00522487	0.00558219	0.00245493	0.00622629	0.00230696	0.00218705	0.00502274	0.00253908	0.0121541	0.00535034	0.00244923	0.00395742	0.0040982	0.00515153	0.00500284
ENSG00000142867	0.00916459	0.011477	0.00632789	0.0300057	0.0167068	0.00705806	0.00882234	0.00687739	0.0121267	0.00769551	0.00262943	0.00584086	0.00650655	0.00281722	0.00665533	0.00802965	0.00687324	0.0109893	0.0107375	0.00668274	0.0140613	0.00572332	2.54197e-05	0.00248703	0.00580982	0.00266129	0.0106365	0.0217158	0.0178672	0.00918507	0.0100546	0.00714395	0.0116474	0.00840713	0.00478383	0.0159112	0.00619869	0.0111143	0.0134689	0.0112354	0.0120894	0.00185133	0.00691448	0.00643292	0.0168434	0.0152518	0.00862746	0.00653859	0.00853544
ENSG00000223653	0.00732611	0.00316522	0.00878402	0.0018128	0.00311645	0.0024555	0.00137572	0.00471764	0.00446563	0.00883007	0.0760155	0.0018973	0.0152673	0.00299237	0.00325007	0.0202372	0.00558955	0.00579082	0.00876054	0.00137603	0.0012058	0.00161648	0.00493445	0.00251841	0.00731323	0.00327312	0.00926019	0.065051	0.00739611	0.00258737	0.0111277	0.0150328	0.00358222	NA	0.0182427	0.00460708	0.00120871	0.00134312	0.00100417	0.0013951	0.00786062	0.0215994	0.00261153	0.00416809	0.0100946	0.00495639	0.00634162	0.00857787	0.00619671
ENSG00000153904	0.00602085	0.0022092	0.00596988	0.00172684	0.00335089	0.00232449	0.00140301	0.00596892	0.00496734	0.00680087	0.165061	0.00160418	0.0108697	0.00369368	0.00376346	0.0121362	0.00461752	0.00470259	0.0100322	0.00136592	0.00117044	0.00156995	0.00443687	0.00258861	0.00468281	0.00273993	0.00882729	0.0591439	0.00590338	0.00376925	0.00733551	0.0100442	0.00337459	NA	0.0171409	0.0032632	0.00129286	0.00123272	0.000943324	0.00133422	0.00841074	0.0184382	0.00285227	0.00493079	0.00720755	0.00526201	0.00578495	0.0075023	0.00279054
ENSG00000282057	0.0245336	0.00554585	NA	NA	NA	NA	NA	0.017405	0.0119328	0.0433277	NA	NA	0.0623746	0.0548139	NA	0.00326164	0.0387898	0.0125004	0.0410472	NA	NA	NA	NA	0.0244714	0.0239728	0.00542631	0.0658374	NA	0.0303806	0.0334033	0.0306179	NA	0.0335082	NA	NA	0.00905103	NA	NA	NA	NA	NA	NA	NA	0.0222627	0.0338562	0.0255233	NA	0.00906235	0.00189217
ENSG00000142871	0.00402631	0.00347899	0.00150834	0.00805516	NA	0.0138258	0.0086627	0.00227907	0.00246864	0.00352888	NA	0.00368463	0.00539299	0.00455268	0.00541326	0.00460489	0.00390589	0.00334266	0.00502845	0.00661022	0.00980322	0.00513568	0.00574984	0.00242357	0.00292051	0.00140262	0.0048958	0.00223653	0.00326757	0.00459149	0.00535106	0.00240435	0.003313	NA	0.0032702	0.00378426	0.0112083	0.0560514	2.54197e-05	0.0106337	0.0137361	0.00449878	0.00456172	0.00293318	0.00456497	0.00428923	0.00394778	0.0023284	0.00299729
ENSG00000117174	0.0457405	0.0405662	0.0497451	0.0263911	0.0234143	0.0522773	0.0351563	0.0649324	0.0526164	0.0412713	0.0610444	0.0512535	0.0441979	0.0535443	0.0328246	0.0424511	0.042446	0.0584258	0.0399773	0.0290467	0.0371829	0.0333436	0.0348058	0.0739653	0.0559706	0.0370663	0.0446728	0.047732	0.0366543	0.0632719	0.0374036	0.0603429	0.0431021	0.0811922	0.0485204	0.05631	0.047587	0.0401878	0.0374636	0.0284977	0.0401489	0.0395281	0.0502425	0.047498	0.0449865	0.0504801	0.0455076	0.0574331	0.0375763
ENSG00000171502	0.215475	0.464828	0.0105924	0.00767002	NA	0.0150076	0.140533	0.0227764	0.031336	0.0147977	0.0978628	NA	0.0572422	0.0210331	0.00769481	0.0455383	NA	0.158173	NA	0.123258	0.0308405	0.0653548	NA	0.0222946	0.0366877	0.0270448	0.0575474	NA	0.116053	0.125227	0.0707059	NA	0.0937641	NA	NA	0.507698	0.0217118	NA	0.0413516	0.0467642	NA	NA	NA	0.0426955	0.77945	0.0353513	NA	0.0251705	0.24001
ENSG00000122417	0.01217	0.0162968	0.0116773	0.00239612	0.00504497	0.00880877	0.00450044	0.0146626	0.0110852	0.0105026	0.00526533	0.00858057	0.0106337	0.00380934	0.00376547	0.00693473	0.010427	0.0127588	0.0118627	0.00388459	0.0047217	0.00741153	0.00914165	0.00913904	0.0117537	0.0231673	0.0109631	0.0118824	0.0154919	0.0138251	0.0129106	0.00696013	0.00526957	0.0167418	0.0253963	0.0123045	0.00476458	0.00600729	0.00471615	0.00450305	0.0147695	0.00886815	0.00507329	0.00635735	0.0132292	0.00743054	0.00743534	0.0107998	0.00806839
ENSG00000137975	0.242085	NA	NA	NA	NA	NA	NA	NA	NA	NA	NA	NA	0.0176246	NA	0.00213141	0.0194265	NA	NA	0.70567	NA	NA	NA	NA	NA	NA	0.0190172	NA	NA	NA	0.0561316	0.0256104	NA	NA	NA	NA	NA	NA	NA	NA	NA	NA	0.0218184	NA	0.118841	NA	NA	0.0161213	NA	NA
ENSG00000261737	0.0302665	NA	NA	NA	NA	NA	NA	NA	NA	NA	NA	NA	NA	NA	0.0199154	NA	0.0355265	NA	0.0243945	NA	NA	NA	0.0969292	NA	NA	NA	NA	NA	NA	NA	NA	NA	NA	NA	NA	NA	NA	NA	NA	0.0251923	0.0555669	NA	NA	NA	NA	0.0313583	NA	NA	NA
ENSG00000097033	0.00438197	0.00550785	0.00428395	0.00323894	0.00256994	0.0029764	0.003555	0.00360187	0.00380786	0.00593329	0.00271129	0.00407551	0.00427553	0.00336784	0.00169287	0.00415889	0.00390467	0.00421346	0.00466713	0.00520228	0.00470789	0.00250277	0.00381252	0.00234206	0.00473472	0.00395809	0.00649574	0.00590909	0.00474443	0.004956	0.00404153	0.0051454	0.00431866	0.017479	0.00590201	0.00537031	0.00397101	0.00486383	0.00207863	0.00225705	0.00613405	0.00329583	0.00306454	0.00526936	0.00323183	0.00480571	0.00448511	0.00380364	0.00326234
ENSG00000183291	0.000977158	0.00288254	0.000760376	0.00201228	0.000534936	0.0013655	0.00264342	0.00138191	0.00145814	0.00149478	0.00324832	0.00235111	0.00237332	0.00294923	0.00164578	0.000769517	0.00160363	0.00165069	0.000970645	0.00380417	0.00403241	0.0025707	0.00382957	0.00108262	0.00352638	0.0026801	0.00103038	0.00242633	0.00220226	0.00177766	0.0037941	0.00170055	0.000852037	0.00612207	0.00234706	0.0029618	0.00220534	0.00426056	0.00111577	0.00345075	0.00101514	0.00116955	0.00356347	0.00180741	0.000847893	0.00112215	0.00362308	0.00173291	0.0011787
ENSG00000153936	0.0045243	0.000852746	0.00734264	0.0146941	0.012165	0.0049546	0.00366223	0.00772835	0.0060145	0.00469129	0.00358378	0.00881902	0.00774344	0.0049375	0.00951293	0.000693466	0.00466417	0.00208714	0.00411993	0.00504497	0.00516927	0.00247789	0.0129185	0.0037024	0.0112812	0.000510804	0.00586768	0.00543885	0.00561292	0.00727507	0.00455307	0.00372653	0.00779718	0.0259956	0.000493899	0.00756113	0.00650382	0.00668557	0.00178584	0.00129477	0.012207	0.00735911	2.54197e-05	0.00303015	0.00281936	0.00378505	0.00460529	0.00585018	2.54197e-05
ENSG00000267272	0.0151697	0.0448695	NA	NA	NA	NA	NA	0.0322634	0.0311682	0.0125644	NA	0.0611925	0.0399122	0.0103139	0.00172182	0.0792502	0.0270363	0.021573	0.0161795	NA	0.0311462	NA	NA	0.0317174	0.0189877	0.0135901	0.024352	NA	0.0134134	0.0295584	0.0298266	0.0414214	0.0261465	NA	0.0639745	0.0439722	0.00863695	NA	0.0276681	0.0147381	NA	0.028896	NA	0.0344479	0.01951	0.0292618	0.00681618	0.0492682	0.0527697
ENSG00000143013	0.0127469	0.00917616	0.0290636	0.0232168	0.0129123	0.0108147	0.00586563	0.0109968	0.00741267	0.013634	0.0145962	0.0100967	0.0192719	0.0121577	0.0128413	0.00772311	0.0103665	0.00546888	0.0132746	0.0154762	0.00739724	0.016538	0.013917	0.0102415	0.00919047	0.0122163	0.0165987	0.016703	0.0163059	0.0156412	0.0135905	0.00248546	0.0183183	0.0386368	0.00650289	0.00894756	0.00975057	0.0163074	0.00995537	0.0169362	0.00388355	0.0102768	0.0371131	0.0113166	0.014277	0.0140868	0.00508596	0.0170815	0.0109073
ENSG00000065243	0.00568746	0.00309434	0.00862126	0.00630438	0.0053054	0.0178005	0.0109745	0.00476279	0.0052503	0.00629811	0.00426847	0.00616343	0.00534805	0.00459375	0.00276977	0.00202174	0.00748068	0.00745461	0.00592694	0.00461419	0.0117474	0.00453265	0.00823882	0.0051171	0.0053667	0.00880615	0.00951587	0.00477712	0.00488224	0.00485314	0.00637883	0.0038996	0.00602288	0.00996119	0.00697198	0.00705128	0.0117419	0.00584567	0.0111383	0.00979048	0.0133484	0.00608266	0.00228771	0.0060808	0.00460607	0.00880353	0.00603443	0.00235327	0.00379717
ENSG00000241975	0.0206225	NA	NA	NA	NA	NA	NA	NA	NA	NA	0.0185747	NA	0.0332857	NA	NA	NA	NA	NA	0.0456528	NA	NA	NA	NA	NA	NA	NA	NA	NA	0.0136143	NA	0.0357479	NA	0.0370816	NA	NA	NA	NA	NA	NA	NA	NA	NA	NA	0.0183042	0.0140774	NA	0.0907143	NA	NA
ENSG00000137947	0.0450297	0.0488024	NA	NA	0.0162868	2.54197e-05	2.54197e-05	0.0136633	0.00563131	0.0107362	0.00699451	0.0292911	0.0337306	0.00711143	0.00334812	0.00662563	0.00492753	0.00508967	0.0330763	0.00824366	0.0138809	0.0405442	0.0164475	0.0281255	0.0604408	0.0146342	0.0211588	NA	0.00646229	0.0444476	0.0391848	0.0142221	0.0373792	0.0609065	0.0166617	0.0176881	2.54197e-05	0.00220268	0.0227739	0.0148114	0.0393987	0.00339619	NA	0.0249055	0.00904369	0.0310103	0.00960823	0.0378666	0.00405754
ENSG00000137944	0.0113534	0.00748592	0.0104542	0.0399945	0.0323249	0.0413965	0.0232405	0.0128639	0.0142182	0.0164495	0.00780534	0.026055	0.00996878	0.0108009	0.0209088	0.00780759	0.0168628	0.015075	0.0128071	0.029972	0.0408224	0.0235291	0.0275501	0.00979055	0.00971348	0.0332294	0.00976957	0.00773442	0.00839548	0.0117303	0.00633601	0.00722186	0.0107203	0.0239973	0.0189809	0.0184055	0.0468102	0.0269714	0.0557896	0.0443065	0.007706	0.019051	0.025828	0.00778343	0.0250667	0.0183973	0.0112257	0.0149883	0.009366
ENSG00000213516	0.0155706	0.01211	2.54197e-05	0.0332279	0.0220208	0.0214779	0.010081	0.028149	0.0131608	0.0234099	0.00911725	0.0434419	0.0258349	0.0208251	0.00459037	0.00255667	0.0160118	0.0165021	0.0163547	0.0159065	0.0124601	0.0317014	0.0248989	0.0129101	0.0205972	0.021356	0.0147786	0.00375388	0.0130889	0.0058376	0.0202289	0.0135645	0.0246208	0.0353862	0.0107268	0.0174017	0.0258074	0.0139181	0.0189409	0.0172124	0.0114108	0.0184686	0.00303671	0.0222305	0.00851836	0.013328	0.0230049	0.0223911	0.0103054
ENSG00000117226	0.112947	0.191932	0.134509	0.484447	0.427728	0.41252	0.504092	0.159885	0.160539	0.180714	0.187727	0.261516	0.0953166	0.185681	0.142791	0.11501	0.246826	0.18152	0.133273	0.502148	0.407883	0.433623	0.478892	0.278114	0.15252	0.417733	0.159899	0.367402	0.0854714	0.17098	0.0755811	0.061414	0.210936	0.135913	0.414644	0.178116	0.37113	0.442935	0.341317	0.495747	0.384423	0.225596	0.27165	0.11419	0.110535	0.222709	0.185426	0.1984	0.0830964
ENSG00000117228	0.0037876	0.0121979	0.00526779	0.00466222	2.54197e-05	0.0138803	0.00819522	0.0100525	0.00903661	0.00547609	0.0312148	0.0189717	0.00512434	0.00264749	0.0050474	0.00685302	0.00282028	0.0039674	0.00599459	0.00885821	0.00311133	0.0146168	0.0133707	0.00438366	0.0116943	0.00502813	0.00448485	0.00342666	0.00504197	0.0045248	0.00642234	0.0046507	0.0116657	0.00628225	0.00438453	0.00976208	0.0212234	2.54197e-05	0.0168203	0.0221479	0.00366859	0.00863888	0.00533841	0.00463292	0.00447032	0.0074349	0.00436739	0.00996896	0.00644908
ENSG00000234518	0.0730278	0.0783721	NA	NA	0.893867	NA	0.893867	0.0357462	0.0337273	0.304918	0.893867	NA	0.0653698	0.0381639	0.437306	0.0653664	0.0955354	0.0584637	0.074408	0.893867	0.893867	0.893867	0.893867	0.126483	0.0310722	0.893867	0.348873	0.100052	0.0454778	0.0282336	0.0596888	0.0257906	0.247591	0.0434054	0.0585547	0.0544851	0.893867	NA	0.893867	0.893867	0.893867	0.283538	0.29038	0.0363031	0.22509	0.381485	0.18205	0.0931818	0.0650024
ENSG00000162645	0.00207549	0.00400475	0.00250173	0.0113671	2.54197e-05	0.00668542	0.00473745	0.0035938	0.00319181	0.00324777	0.0322006	0.00301738	0.00199944	0.00178495	0.00387123	0.00335056	0.00218331	0.00382982	0.00398808	0.00514707	0.0036092	0.0157828	0.0091179	0.0025076	0.00354607	0.00593744	0.00264216	0.00499489	0.00168169	0.00351177	0.00239594	0.0022066	0.00407096	0.00490044	0.00418427	0.00434856	0.00628317	0.0122216	0.00223646	0.0173067	0.00933671	0.00320291	0.0010651	0.00213498	0.00370305	0.00406873	0.00371755	0.00319651	0.00161642
ENSG00000162654	0.0185435	0.0371219	0.0121071	0.0210132	0.0312005	0.0220039	0.0205085	0.0142268	0.0166783	0.0181071	0.116391	0.0594373	0.0237351	0.0119516	0.030295	0.0101892	0.0154634	0.0162693	0.0135331	0.010898	0.0202467	0.018547	0.0296812	0.0141343	0.0156776	NA	0.0167767	0.0246348	0.0114461	0.015381	0.0258513	0.0114926	0.0179739	0.0215978	0.0100002	0.0220338	0.0278429	0.0228012	0.0236121	0.0255948	0.0271717	0.0204011	0.0179356	0.0173718	0.0181998	0.00725112	0.0235814	0.0243276	0.0182569
ENSG00000154451	0.0647018	0.0428116	NA	NA	NA	NA	NA	NA	NA	NA	0.0687463	NA	NA	0.0250958	NA	0.0323177	0.0262251	0.0229091	0.0421292	NA	NA	NA	NA	0.036438	NA	NA	NA	NA	NA	0.0124499	NA	0.0162825	0.049673	0.0232643	NA	NA	NA	NA	NA	NA	NA	0.0370976	NA	0.019221	NA	NA	NA	0.0508158	NA
ENSG00000225492	0.175333	0.218483	NA	NA	NA	NA	NA	0.206968	0.112357	0.0811292	NA	NA	0.116515	0.14868	NA	0.0491693	0.12008	0.149344	0.259726	NA	0.0372916	NA	NA	0.176216	0.178013	NA	0.0508623	NA	0.0539255	0.194222	0.210652	0.0714461	0.260309	NA	NA	0.184526	NA	NA	NA	NA	0.0430927	0.00974472	NA	0.0520315	0.385241	0.0168864	0.0722369	0.175174	0.411738
ENSG00000197147	0.0211125	0.0269161	NA	0.0161143	0.0833666	0.00277095	0.000220962	0.0186334	0.0199472	0.0109655	0.0500866	0.0113404	0.0221594	0.0116449	0.00273124	0.0213923	0.0259239	0.0263422	0.010457	0.0114553	0.00990637	0.0118974	0.0158199	0.00973331	0.013251	0.0168496	0.0117565	0.0167753	0.0237263	0.0152172	0.0272133	0.0281979	0.0100408	0.0755575	0.0142742	0.0307214	0.00667355	0.103468	0.00681806	0.00300935	0.0105642	0.00477702	0.0761724	0.0151132	0.00898584	0.00484394	0.00587738	0.00622875	0.00701532
ENSG00000231999	0.0144408	0.00908326	NA	0.00578179	0.0335623	0.00247084	0.00148929	0.0129083	0.00853417	0.0161272	0.0536606	0.00969081	0.0219553	0.011888	0.00353947	0.0123456	0.0336519	0.0130949	0.0157345	0.00335699	0.0050601	0.00917638	0.0151458	0.0122761	0.0112333	0.0130744	0.0256365	0.024169	0.0195631	0.0126183	0.0216777	0.0115385	0.0109718	0.0549558	0.0128524	0.0156349	0.0046284	0.0776951	0.00466187	0.00435069	0.00688934	0.00664051	0.0251183	0.0136786	0.00598889	0.00366506	0.00854606	0.00528493	0.00602887
ENSG00000230735	0.0208527	NA	NA	NA	NA	NA	NA	NA	0.0297122	NA	NA	NA	0.0154835	0.006155	0.00771031	NA	0.0290959	0.012555	0.0151723	NA	NA	NA	NA	NA	NA	NA	0.024365	NA	0.0122715	NA	0.0429156	0.0149314	0.0327604	0.0706841	0.0281265	0.0682787	NA	NA	NA	NA	NA	NA	NA	0.0432762	0.0271812	0.00750251	NA	NA	0.00624563
ENSG00000171488	0.0361542	0.0411472	NA	0.0464505	NA	0.0811914	0.0365832	0.0507873	0.0542145	0.0347044	0.160982	NA	0.030111	0.0442359	0.00914188	0.0280903	0.0460204	0.0688831	0.0377532	0.0291076	0.100701	0.094509	0.068449	0.0518943	0.0599626	0.0354883	0.0434433	NA	0.0363531	0.0554145	0.039896	0.0556546	0.0383017	0.0442299	0.041505	0.0523754	0.121053	NA	0.106312	0.0414832	0.0504681	0.0504297	NA	0.034409	0.0360124	0.0330824	0.0140548	0.036643	0.0456791
ENSG00000162664	0.00578457	0.00464181	2.54197e-05	0.00630027	0.00421995	0.00281701	0.00308417	0.00292075	0.00335118	0.00504392	0.00155077	0.00312109	0.00493132	0.00193532	0.00279263	0.00575531	0.00621774	0.00536634	0.00462123	0.00287613	0.00459967	0.00381633	0.00264813	0.00321436	0.00443081	0.00151518	0.00831774	0.00397758	0.00313158	0.00637514	0.00436174	0.00369381	0.00383199	0.0196012	0.00314616	0.00286533	0.00533526	0.00412143	0.00832552	0.00238387	0.00300055	0.00571141	0.0047434	0.00517367	0.00303708	0.00400939	0.000735523	0.00253761	0.00366491
ENSG00000233593	0.0570141	NA	NA	0.0470021	0.00789661	0.0563634	NA	NA	NA	NA	NA	0.0196625	NA	NA	0.0175839	0.00755193	NA	NA	NA	NA	0.0233367	0.0207896	0.0279353	NA	NA	0.0206801	0.0213059	0.0209767	0.021768	0.0540583	NA	NA	0.0261718	NA	0.0127957	NA	0.0963649	0.00649137	0.022069	0.0129746	0.0110828	NA	NA	NA	0.00884609	0.0177086	NA	NA	2.54197e-05
ENSG00000122482	0.00965978	0.0117752	2.54197e-05	0.0118463	0.0069127	0.0116771	0.0224608	0.00829672	0.0113709	0.00439748	0.000772609	0.00811272	0.011695	0.00268804	0.00835054	2.54197e-05	0.00696445	0.00135593	0.0112798	0.00522068	0.00195808	0.0135344	0.0159496	0.00578758	0.00792376	0.00125703	0.0250399	0.00309738	0.00816435	0.00966471	0.0140291	0.00717272	0.0114682	0.0588696	0.0100863	0.00668864	0.0040151	0.00768756	0.00131292	0.015814	0.0046907	0.00831529	0.00452282	0.0176686	0.00232598	0.0104737	0.00639647	0.0103395	0.00234883
ENSG00000162669	0.145625	NA	NA	0.245068	0.0158333	0.40844	0.629799	0.111137	0.107786	0.0995871	NA	0.301364	NA	NA	0.00788754	0.0979149	0.211675	NA	0.178881	0.278483	0.124506	0.133611	0.403348	0.16398	0.190926	NA	0.162541	NA	0.303015	0.21095	NA	NA	0.0532152	0.893867	0.855599	0.893867	0.297914	0.0558572	0.356548	0.234077	0.282284	NA	0.0541301	0.364383	0.0683729	0.0302634	NA	0.210284	0.059374
ENSG00000097046	0.0556224	NA	NA	0.0403318	0.0185527	0.0596478	0.0402153	0.0593471	0.0391856	0.06889	0.0122063	0.0697947	0.140826	0.0599349	0.00229441	0.0736018	0.0496781	0.0803327	0.0647825	0.0222074	0.0392438	0.0226441	0.0592861	0.0622478	0.0573474	0.0251197	0.0225213	0.0543676	0.0732963	0.0747326	0.119501	0.0231027	0.072712	0.109593	0.0335554	0.107652	0.0256902	0.0202377	0.0256341	0.0224526	0.0508126	0.0713244	0.064118	0.0641065	0.0540041	0.0369586	0.0493347	0.062468	0.0467178
ENSG00000069702	0.00218971	0.0078311	0.00156954	0.0143147	NA	0.0277011	0.00659645	0.00203989	0.00201694	0.00458276	0.165174	0.0180337	0.00401542	0.00192961	0.00343641	0.00227349	0.00207623	0.00446488	0.00231754	0.00404592	0.00574343	0.00753027	0.0258681	0.00160082	0.00212317	0.00267186	0.00586619	0.00590761	0.00339919	0.00286907	0.00341093	0.006283	0.003001	0.0113757	0.00157969	0.00403394	0.00957127	2.54197e-05	0.0211211	0.0100445	0.00781535	0.00265227	0.0027728	0.00312977	0.00323763	0.00823075	0.00359152	0.00123018	0.00176492
ENSG00000069712	0.0182527	0.0331633	NA	0.0475233	0.0199244	0.0393332	0.0453243	0.0170204	0.0103652	0.061603	NA	NA	NA	NA	0.00499881	0.00690337	0.0267998	0.0126158	0.031027	0.0272872	0.0271142	0.0313772	0.023859	0.0315406	0.0243761	0.00473099	NA	NA	0.0207585	0.0313902	0.0596561	0.0379097	0.0303016	NA	0.0149998	0.038095	0.0342049	0.0221121	0.0399814	0.036912	0.0154264	NA	NA	0.0223018	0.0112094	0.0154621	0.0148848	NA	0.0220411
ENSG00000174842	0.0166193	0.0150263	NA	NA	0.0153783	NA	NA	0.0237135	0.0119323	0.0254802	0.00643108	0.0220588	0.0125424	0.00532385	0.00772792	0.0118557	0.0132102	0.00601764	0.0224717	0.0299032	0.0230385	NA	NA	0.0247085	0.0136561	0.00671706	0.0194908	NA	0.0128766	0.0177445	0.0178102	0.00907728	0.0172989	NA	0.0290979	0.0248148	0.0201924	0.0100765	0.0108292	0.0379207	0.0320022	0.0112786	NA	0.00854455	0.0161132	0.00423486	0.0130102	0.0100234	0.0116506
ENSG00000122484	0.0068294	0.00174975	0.00998303	0.000903131	0.0018824	0.0208418	0.00808895	0.0061774	0.00817748	0.0123878	0.0065543	0.0080304	0.00918064	0.00622868	0.000815253	0.0084676	0.00777826	0.00764565	0.014817	0.00873107	0.00575631	0.0085796	0.0121538	0.00438155	0.00824614	0.00218504	0.0162625	0.0162398	0.00528942	0.0054319	0.00785958	0.00418119	0.00454587	0.0760012	0.00644878	0.0120953	0.0116403	0.00349415	0.00396506	0.00266374	0.000914729	0.00381665	0.00721144	0.0134348	0.00434137	0.00590949	0.00822739	0.00637906	0.00728329
ENSG00000067208	0.00671924	0.00416417	0.00204635	0.0192279	0.00441158	0.0112104	0.0175901	0.0113314	0.00862016	0.00825059	0.033337	0.00290415	0.00707539	0.00715826	0.00191052	0.0114354	0.00879202	0.0121321	0.00699304	0.0115885	0.0109442	0.00948959	0.0130546	0.00871305	0.00989419	0.00841141	0.0111565	0.0142678	0.00526983	0.0132292	0.00501451	0.00966902	0.00261882	0.0426266	0.00223254	0.00737252	0.0180569	0.00256155	0.00911319	0.00760074	0.0289366	0.0132886	0.0143635	0.00793092	0.00851617	0.00480565	0.00607854	0.00423294	0.0046347
ENSG00000122406	0.0114552	0.00456209	0.00339626	0.0129045	0.00436429	0.0186115	0.00796488	0.0102703	0.00436417	0.00517517	0.0131001	0.00461441	0.00485951	0.00565575	0.0085959	0.00277398	0.00899045	0.0122485	0.00877829	0.00780399	0.0046796	0.0124864	0.00744549	0.00483429	0.00872486	0.00507805	0.00517163	0.00296359	0.00858973	0.00475958	0.00559799	0.00597893	0.0049863	0.02062	0.00809488	0.0108682	0.00274001	0.00406683	0.00599854	0.00807353	0.00528941	0.00429564	0.000881491	0.00330046	0.00414058	0.00331029	0.00684092	0.00718981	0.00380052
ENSG00000154511	0.00730034	0.00230911	0.00627159	0.0109606	0.00667595	0.0120073	0.00586892	0.00677609	0.0042615	0.00305478	0.00616588	0.00334655	0.00462648	0.00339932	0.00681661	0.00662058	0.00316473	0.0137873	0.00424156	0.00362862	0.00514647	0.00513787	0.00435023	0.00479222	0.00554817	0.00497951	0.0024942	0.00457081	0.00454326	0.00373837	0.00492696	0.0034907	0.00359131	0.0143132	0.0068912	0.00639917	0.00361999	0.00372268	0.00792463	0.00581258	0.00264435	0.00327724	0.0023068	0.00342282	0.00430232	0.00175171	0.00572868	0.00501121	0.0032772
ENSG00000207523	0.0266317	0.0222267	NA	NA	NA	NA	NA	0.0267121	0.0223347	0.0419308	NA	NA	0.0125071	0.0135352	NA	0.00954747	0.0306608	0.0141166	0.0361241	NA	NA	NA	NA	0.0270774	0.0448489	NA	NA	NA	0.0110622	0.00886653	0.0389701	0.0179299	0.0103655	NA	NA	0.0227951	NA	NA	NA	NA	NA	0.00556145	NA	0.00833115	0.00943417	0.0150473	0.00141178	NA	0.0119968
ENSG00000143033	0.00720085	0.0120173	0.0110417	0.0115337	0.00105052	0.00986417	0.00306687	0.00746369	0.0117317	0.0167958	0.000360268	0.0110945	0.0105426	0.0106279	0.00301553	0.0108162	0.00697928	0.00874249	0.0138712	0.00729127	9.64033e-05	0.00474047	2.54197e-05	0.0110591	0.00968726	2.54197e-05	2.54197e-05	0.010719	0.00765585	0.008973	0.00898731	0.00300845	0.00530866	0.0278625	0.00921631	0.0120324	0.00588985	0.00614724	0.00517526	0.00104284	0.0175164	0.0112555	2.54197e-05	0.0100629	0.00470186	0.0106596	0.00444174	0.0196746	0.00308146
ENSG00000117500	0.0038104	0.00176597	2.54197e-05	0.00968639	0.00133025	0.00696583	0.00644734	0.00229648	0.00224768	0.00280996	0.00194583	0.00415967	0.00558495	0.00237958	0.00196338	0.00524593	0.00242892	0.00152305	0.00383536	0.00154095	0.00322985	0.00413903	0.00307551	0.00272604	0.00441886	0.00226295	0.0036291	0.00334891	0.00216548	0.00416467	0.0100364	0.00136438	0.00278583	0.00744466	0.000904479	0.00231405	0.00601153	0.00766079	0.0057757	0.00474731	0.00179633	0.00204507	0.00342632	0.00206982	0.00269677	0.00234895	0.00314281	0.000889916	0.00455228
ENSG00000122483	0.0269527	0.0379418	0.0582763	0.0248846	0.0464837	0.0266105	0.0293904	0.073039	0.0551955	0.0337007	0.0174325	0.0467577	0.0382922	0.0468303	0.0174506	0.0539019	0.0359472	0.0467837	0.0474362	0.0246082	0.0439905	0.0246334	0.0373066	0.0511948	0.0550914	0.0192627	0.0531754	0.0181267	0.0543267	0.0624771	0.0347534	0.0582721	0.0712996	0.0553639	0.0317194	0.043038	0.0376736	0.0523534	0.0254547	0.0186762	0.0310362	0.0342957	0.0536533	0.0546212	0.0841881	0.0887979	0.0415761	0.0400889	0.0832611
ENSG00000223745	0.0499704	0.054461	0.0864544	0.0465148	0.0491069	0.0574901	0.0425045	0.0703205	0.0733405	0.056739	0.0278604	0.0372898	0.0502429	0.0422502	0.0295944	0.0578716	0.0678826	0.0588166	0.0569425	0.0358557	0.0658002	0.0299479	0.0512293	0.0469581	0.0719513	0.0190184	0.0489554	0.0493648	0.0731888	0.0670508	0.0401053	0.0564205	0.0670016	0.0733795	0.047878	0.0619952	0.0354184	0.0793445	0.0350901	0.0365617	0.0528019	0.0364279	0.0614251	0.0718474	0.0807465	0.102026	0.0351718	0.0501955	0.0635375
ENSG00000117505	0.0068687	0.00937154	0.0138761	0.00877809	0.00622385	0.00831291	0.0138959	0.00770066	0.00653079	0.010093	0.00296983	0.00528937	0.00473699	0.00359117	0.00556512	0.00278454	0.00465487	0.00498011	0.00552451	0.00546417	0.00352769	0.00357067	0.0083992	0.00350851	0.00447361	0.00468253	0.00432534	0.0048662	0.00900735	0.00596982	0.00677623	0.00362097	0.004222	0.0091654	0.000857477	0.0079088	0.00148585	0.00975006	0.0063443	0.00590857	0.0146486	0.00170519	0.00703419	0.00606861	0.00582901	0.00418134	0.0054847	0.00482369	0.00369832
ENSG00000137942	0.0145199	0.0456299	NA	0.0473486	2.54197e-05	0.00127578	0.0322207	0.00688859	0.0235871	0.0114792	NA	0.0140996	0.0164282	0.00667057	2.54197e-05	0.000583148	0.00631505	0.0165988	0.0107933	0.0116041	0.0558355	0.0496519	0.0649841	0.00121899	0.0212811	0.0212957	0.0434042	0.0175822	0.0178406	0.021703	0.0114207	0.0454702	0.00727165	NA	0.0175019	0.0647518	0.0185804	0.00392961	2.54197e-05	0.0315933	0.0129655	0.0118439	0.00204347	0.00844136	0.00481075	0.00678988	0.00631239	0.0044407	0.0112492
ENSG00000137936	0.00789919	0.0236071	0.00591634	0.0168042	0.0243075	0.0252628	0.0164756	0.0113369	0.0173523	0.0147786	0.0604384	0.0121015	0.00961202	0.0114562	0.00597814	0.0109177	0.0108873	0.0151882	0.00640716	0.0106797	0.0306859	0.0276945	0.00866233	0.00821908	0.0159551	0.00959863	0.0181614	0.00847197	0.00642095	0.0120376	0.0101867	0.00907756	0.0090669	0.114456	0.00976443	0.0170328	0.0189049	0.0157489	0.0146257	0.0110446	0.0276971	0.0167654	0.003931	0.00690854	0.00693703	0.0107741	0.00809966	0.00817057	0.0142094
ENSG00000067334	0.00636465	0.00413253	0.0141661	0.00116556	0.000585555	0.00316809	2.54197e-05	0.00187452	0.0035357	0.00300971	0.00377039	0.00724811	0.00397031	0.00418791	0.00181195	0.00309132	0.00586688	0.00518151	0.00631324	0.00277855	0.0026824	0.00392749	2.54197e-05	0.00261541	0.00385747	0.00332658	0.00274788	0.00629895	0.0055533	0.00707415	0.00476608	0.00450142	0.00651992	0.0108648	0.00435421	0.00500341	0.00209892	0.0020437	0.00117289	0.0013703	0.00215543	0.00419173	0.00188008	0.00560705	0.00286609	0.00384513	0.00428043	0.00490329	0.00162085
ENSG00000023909	0.025827	0.028949	0.0274793	0.0320455	0.0185048	0.0404022	0.050415	0.0300599	0.0356094	0.0289978	0.00851413	0.0248997	0.024664	0.0235167	0.00899447	0.0240675	0.0205552	0.0278284	0.0217057	0.0238078	0.0264414	0.0235975	0.0427961	0.0194948	0.0256684	0.0269703	0.0253501	0.0199465	0.0220231	0.0257552	0.0362799	0.0137905	0.0195542	0.0513989	0.0214224	0.0276707	0.0240241	0.00904122	0.0338458	0.0371665	0.029576	0.0291165	0.0110771	0.0220521	0.024356	0.0256154	0.015945	0.0184362	0.0126711
ENSG00000198691	0.0619469	NA	NA	NA	NA	NA	NA	NA	NA	NA	NA	NA	0.0221606	0.294763	0.0151265	NA	0.0468968	NA	0.0572923	NA	NA	NA	NA	NA	NA	NA	NA	0.0892194	NA	0.0431326	0.0289314	NA	0.0397926	NA	NA	NA	NA	NA	NA	NA	NA	NA	0.0510375	0.029198	NA	NA	NA	NA	NA
ENSG00000137962	0.00392617	0.00758366	0.0197096	0.0158781	0.00355742	0.0258701	0.00596304	0.0243773	0.00482926	0.00463196	NA	0.0111591	0.00388166	0.00548865	0.00254373	0.00365033	0.0017954	0.0031923	0.0042049	0.00155026	0.00325422	0.00475791	0.00810162	0.0125598	0.00515828	0.0143226	0.00333711	0.00474686	0.00387707	0.00623149	0.00543236	0.0022126	0.00289785	NA	0.00852736	0.00390259	0.00306382	0.00665796	0.00966162	0.00517673	0.0126092	0.00636568	0.00275246	0.00377604	0.00763864	0.00220727	0.00389507	0.00784644	0.00236917
ENSG00000117528	0.0144436	0.0152193	0.00913733	0.0146757	0.00841182	0.00912048	0.0149068	0.0178806	0.0154172	0.00884679	0.00448314	0.00702824	0.00611785	0.0121442	0.00506043	0.00623561	0.0124249	0.011615	0.00830995	0.00762963	0.00319681	0.00754176	0.00422825	0.00398466	0.0161594	0.00329265	0.00694432	0.00280052	0.0173533	0.0133588	0.00986668	0.0165525	0.00816435	0.0502567	0.00585387	0.0143165	0.00298794	0.00730543	0.00586699	0.0066105	0.00789317	0.00581521	0.00411187	0.0107391	0.00570195	0.00417958	0.00279105	0.00984759	0.0104065
ENSG00000117525	0.0184563	0.0582628	0.0120823	0.00929712	0.0109747	0.00656186	0.00599745	0.0121825	0.0130645	0.0241058	NA	0.0126855	0.0116778	0.00810684	0.00581788	0.0203165	0.0143837	0.0199605	0.0127723	0.00758442	0.00685258	0.0118316	0.00826501	0.00559713	0.00747669	0.0304253	0.0162958	0.051094	0.0135799	0.0195566	0.0117892	0.040125	0.0129639	0.125661	0.0526035	0.043507	0.00585741	0.0081383	0.00733072	0.00636306	0.0142741	0.0115638	0.00938989	0.0172723	NA	0.0155198	0.00987488	0.00600983	0.0161587
ENSG00000224081	0.0370475	0.0389204	0.0331953	0.0349562	0.302755	0.0251096	0.0123284	0.0273515	0.0623811	0.0194029	NA	0.00981239	0.0237974	0.0135547	0.299534	0.0130632	0.0272167	0.0215521	0.0140725	0.0217339	0.0265785	0.015614	0.0250598	0.00445292	0.0411978	0.0606673	0.0712676	0.0483304	0.0644085	0.0120139	0.0317647	0.0581683	0.0325813	NA	0.0119946	0.0428855	0.0221037	0.237555	0.0229252	0.0108828	0.0247588	0.0118178	0.0198564	0.0253807	0.0263402	0.0078275	0.0122118	0.0108988	0.0443675
ENSG00000143036	0.0519279	0.0456914	0.0112058	0.0595781	0.427642	0.0455449	0.0224119	0.0380599	0.081891	0.0639148	NA	0.0231082	0.0221248	0.0207629	0.00854572	0.00836011	0.0354336	0.0449808	0.0121996	0.0309092	0.0209312	0.0236551	0.0358738	0.0102615	0.0785305	0.0286471	0.202557	0.0757508	0.0787659	0.0192425	0.0252496	NA	0.0492249	NA	0.0175128	0.0581524	0.0221008	0.289743	0.025877	0.0269045	0.0484375	0.0118901	0.0327098	0.0247836	0.0217816	0.0156806	0.00693062	0.0142154	0.0503337
ENSG00000117519	0.00408583	0.00391983	0.00138521	0.00282884	0.0343861	0.00443236	0.00292389	0.00313237	0.00337233	0.00330401	0.311171	0.00447029	0.00401132	0.0034062	0.00255219	0.0029414	0.00363959	0.00500074	0.00407668	0.00174222	0.00344611	0.00371974	0.00242724	0.00380612	0.00419459	0.00221666	0.00254521	0.00616044	0.00308881	0.00394603	0.00484683	0.0071939	0.0023176	0.0789261	0.00338009	0.00439655	0.00492063	0.023425	0.00389183	0.0029679	0.00314915	0.00414586	0.00415058	0.0032685	0.00299076	0.00297466	0.00438019	0.00431438	0.00298054
ENSG00000235501	0.0155711	0.0125938	0.021578	0.0301286	0.0151816	0.0183126	0.0281493	0.0143608	0.0112217	0.0164229	0.247721	0.0306462	0.0294191	0.0158441	0.0145597	0.00991102	0.021661	0.0133519	0.0258208	0.0303553	0.029907	0.0189608	0.0386203	0.014075	0.0188665	0.0148639	0.0160063	0.0396447	0.0145446	0.0124311	0.0302016	0.018692	0.017928	NA	0.0151613	0.00848719	0.0265613	0.01119	0.0388333	0.0301793	0.0462695	0.0186737	0.0123428	0.018657	0.0106508	0.00968638	0.0145259	0.0258158	0.0160267
ENSG00000172339	0.0566581	0.0380402	NA	NA	0.0075686	NA	2.54197e-05	NA	NA	NA	NA	NA	NA	NA	0.0131474	0.0496592	0.0576592	0.0168399	0.0537654	NA	NA	NA	NA	0.0394307	NA	0.0155993	NA	NA	0.0247964	0.0474431	0.0371133	NA	0.0458698	NA	0.00974461	0.0505466	NA	0.011196	NA	0.0276913	NA	0.0544887	NA	NA	0.0378793	0.0258919	0.0111407	NA	0.0410508
ENSG00000152078	0.0208086	0.0129829	2.54197e-05	0.00917782	0.00424899	0.0126128	0.00923452	0.0152131	0.022893	0.0138049	NA	0.00628512	0.0719585	0.0202412	0.0105789	0.0320504	0.0296434	0.0191846	0.0296772	0.00687958	0.00625739	0.0103907	0.0266845	0.011564	0.0128411	NA	0.0186733	0.00648879	0.0351621	0.037678	0.0697845	0.0826418	0.0471287	0.0498805	0.00488331	0.0194803	0.011013	0.00433639	0.00785165	0.00661167	0.0310841	0.0501203	0.0598752	0.0185996	0.0124395	0.00744005	0.00617664	0.0130016	0.0197464
ENSG00000226026	0.0110439	0.0156507	2.54197e-05	0.00706545	0.00339203	0.012076	0.00183099	0.00460746	0.0142276	0.0108197	NA	0.01525	0.064789	0.00861106	0.0124941	0.0161585	0.0161977	0.031692	0.0123142	0.00968961	0.00435495	0.00757755	0.0164862	0.00598787	0.0059409	NA	0.0167781	0.00707132	0.0122154	0.0343405	0.0865268	NA	0.0791153	0.0702699	0.00823992	0.0244384	0.0094964	0.00416337	0.00686155	0.0039196	0.0173122	0.0440844	0.0432862	0.0111045	0.0265838	0.00372987	0.0130294	0.013605	0.00446127
ENSG00000122481	0.0342709	0.0368762	NA	0.0311532	0.0466094	0.0629022	0.0296222	0.0524309	0.0558645	0.0235615	0.034932	0.0396338	0.0453898	0.0261741	0.0119089	0.0582454	0.0304658	0.0337673	0.0317159	0.0343682	0.0365454	0.0511996	0.0724276	0.0350941	0.0456428	0.0230368	0.0285126	0.0536532	0.0471784	0.0325511	0.0520296	0.050132	0.0401283	0.103913	0.0233709	0.0403307	0.0254385	0.0631449	0.0255758	0.0303438	0.0590912	0.0280135	0.033111	0.048013	0.0427642	0.0255465	0.0268854	0.0263841	0.0520079
ENSG00000228852	0.0216008	0.0183285	NA	0.00816331	0.00834388	0.0415457	0.0112057	0.0292141	0.0214691	0.00872327	0.0283482	0.0222044	0.0169356	0.0114281	0.00785061	0.0370975	0.0167785	0.0236487	0.0231174	0.0104233	0.0113409	0.0193416	0.0281424	0.0154772	0.018051	0.0121095	0.0110375	0.0234779	0.0220858	0.00930213	0.0388303	0.0134325	0.0241521	0.085789	0.00790052	0.0195328	0.0100079	0.0148245	0.0131865	0.0157734	0.0232484	0.0115138	0.0138268	0.0339714	0.0183616	0.00752325	0.00776295	0.0102108	0.0299091
ENSG00000228971	0.0435071	NA	NA	NA	NA	NA	NA	NA	NA	NA	NA	NA	0.048008	NA	0.0253059	NA	0.0400393	NA	0.0272233	NA	NA	NA	NA	NA	NA	NA	NA	NA	0.0682902	NA	0.0968061	NA	NA	NA	NA	NA	NA	NA	NA	NA	NA	0.092337	NA	NA	NA	NA	0.207315	NA	NA
ENSG00000228502	0.893867	NA	NA	NA	NA	NA	NA	NA	NA	NA	0.893867	NA	NA	NA	NA	NA	NA	NA	0.893867	NA	NA	NA	NA	NA	NA	0.893867	NA	NA	NA	NA	0.893867	NA	NA	NA	NA	0.893867	NA	NA	NA	NA	NA	NA	NA	NA	NA	NA	NA	NA	NA
ENSG00000137970	0.893867	0.893867	NA	NA	NA	NA	NA	0.893867	0.893867	NA	0.893867	0.893867	0.893867	0.893867	NA	0.893867	0.893867	NA	0.893867	NA	NA	NA	NA	0.893867	0.893867	0.893867	0.893867	NA	0.893867	0.893867	0.893867	NA	0.893867	NA	0.893867	0.893867	NA	NA	NA	NA	NA	0.893867	NA	0.893867	0.893867	NA	NA	0.893867	0.893867
ENSG00000117569	0.00503448	0.00455353	0.000771247	0.00614427	0.00100828	0.011961	0.00611423	0.00284296	0.00324935	0.00535424	0.0055585	0.0117093	0.00454301	0.00417485	0.00129846	0.00205307	0.00385789	0.00517389	0.00348284	0.009882	0.00163628	0.00724557	0.00886743	0.00324372	0.00292727	0.010312	0.00500335	0.00693633	0.00418233	0.00283177	0.00576966	0.00208534	0.00477625	0.0244076	0.00725224	0.00411168	0.00172819	0.000443436	0.0056049	0.00251736	0.00544417	0.00440492	2.54197e-05	0.0047575	0.0038527	0.0018748	0.00382537	0.00606988	0.00208181
ENSG00000188641	0.00356978	0.00464893	0.000105426	0.00371279	NA	0.00899307	0.0091436	0.00286872	0.00391599	0.00415326	0.0357991	0.00635977	0.00924986	0.00584742	0.0206384	0.00311521	0.00241053	0.00156306	0.0029411	0.00347784	0.00806143	0.00618361	0.010915	0.00400389	0.00260399	0.00487814	0.0075882	0.00705869	0.00378698	0.00368121	0.00862082	0.00224921	0.00661629	0.00434687	0.00482544	0.00632537	0.00988092	NA	0.00412941	0.00494	0.00214905	0.00463557	0.00905992	0.00296201	0.00143163	0.00319886	0.00391153	0.00432094	0.000950901
ENSG00000232878	0.0219996	0.0264117	NA	NA	NA	0.0545875	NA	0.0230257	0.0181326	0.0249494	NA	NA	0.0239701	0.0241802	0.0718219	0.00273194	0.0156259	0.0149117	0.0258662	NA	NA	NA	0.030957	0.0150547	0.0168418	0.0128069	0.0485588	0.000176103	0.0117927	0.0327931	0.0294569	0.0114131	0.0312681	0.0189212	0.00936784	0.018036	NA	NA	NA	NA	0.018891	0.00647034	NA	0.00972212	0.00585016	0.00864508	0.00185472	0.0416696	0.0145917
ENSG00000232542	0.0583547	NA	NA	NA	NA	NA	NA	NA	NA	NA	NA	NA	NA	NA	NA	0.0215793	0.0543257	NA	0.028834	NA	NA	NA	NA	NA	NA	NA	NA	NA	0.0194774	NA	NA	NA	NA	0.0611812	NA	NA	NA	NA	NA	NA	NA	NA	NA	0.0507529	NA	NA	NA	NA	0.0151836
ENSG00000162627	0.00563484	0.0107617	2.54197e-05	0.00791419	NA	0.0261165	0.0146711	0.00552573	0.00387801	0.00978748	NA	0.0145976	0.0148087	0.00493373	0.000930536	0.00627682	0.00781766	0.00703136	0.00673075	0.00455718	0.017117	0.000419172	0.00698289	0.00443772	0.0029715	0.00205847	0.00902422	0.0051446	0.00567763	0.00759575	0.00658619	0.0189634	0.00929376	NA	0.00375357	0.00248773	0.0180517	NA	0.0101945	0.0155307	0.0064191	0.00447147	0.0235934	0.0160231	0.0013834	0.0015236	0.00365466	0.00467415	2.54197e-05
ENSG00000117600	0.042388	NA	NA	NA	NA	NA	NA	NA	NA	NA	NA	NA	NA	NA	NA	NA	NA	NA	NA	0.0209931	0.00896856	2.54197e-05	NA	NA	NA	NA	NA	NA	0.0458286	NA	NA	NA	0.0792051	NA	NA	NA	0.011625	NA	0.00754447	0.0193939	NA	NA	NA	NA	NA	0.00979239	NA	NA	NA
ENSG00000099260	0.0641299	0.0283378	NA	0.301894	NA	0.105771	0.0429687	0.0259519	0.0142005	0.256487	NA	0.190987	0.0198398	0.0226974	0.0179449	0.0105997	0.0967621	0.0645135	0.0594292	0.0312193	0.0247649	0.0132792	0.0476614	0.0180587	0.0130413	NA	0.491672	0.0201277	0.0720787	0.02029	0.0132842	0.0422195	0.019749	NA	0.670526	0.0140694	0.108298	0.044859	0.0495653	0.112346	0.0450252	0.0128363	0.0372212	0.0187925	0.0123749	0.0373477	0.0283908	0.0202347	0.0211343
ENSG00000156869	0.0313269	0.0486844	NA	NA	NA	NA	NA	0.0621689	0.044931	0.0502635	0.0213504	0.0527299	0.023641	0.0500674	0.0445072	0.00673785	0.0167966	0.0276671	0.0233059	NA	NA	NA	NA	0.273099	0.0438469	0.0557851	0.0734404	0.0137758	0.0295028	0.0418062	0.0212264	NA	0.0444387	NA	0.0278622	0.0696643	NA	NA	NA	NA	NA	0.0149388	NA	0.0245931	0.0416468	NA	0.0463238	0.0239078	0.0224304
ENSG00000162688	0.0075448	0.00435314	0.000834847	0.0145943	0.00480122	0.0101599	0.00468536	0.00325668	0.00382035	0.00559764	0.00206307	0.00946462	0.00712744	0.00385848	0.00244963	0.0103311	0.0052427	0.00906052	0.00619626	0.00472901	0.0107431	0.0069573	0.00843904	0.00511757	0.00396984	0.0012872	0.00570558	0.00441576	0.00821089	0.00287327	0.00632168	0.00795371	0.00457935	0.0186386	0.0014358	0.00428233	0.00451255	0.00521486	0.00687063	0.00550556	0.0200857	0.00254196	0.00459128	0.00645462	0.00698341	0.00182958	0.00337526	0.00579435	0.00380756
ENSG00000117620	0.0145839	0.00352906	NA	0.015782	0.00966818	0.0128809	0.00594108	0.00533223	0.00369219	0.0134193	0.00532194	0.00794359	0.0120321	0.00404449	0.0102095	0.00996505	0.0102935	0.0133029	0.0118741	0.0275096	0.0121052	0.0235459	2.54197e-05	0.0031703	0.00702536	0.0103762	0.0100609	0.00225509	0.0134564	0.00972547	0.0221276	0.00818317	0.00722215	0.0427882	0.00279305	0.0104965	0.00222763	0.00853428	0.0162545	0.00673742	0.0160021	0.00526469	0.0111621	0.0106249	0.00742634	0.0131235	0.0041607	0.0242593	0.00622376
ENSG00000156875	0.00666706	0.00653249	2.54197e-05	0.0172853	0.00561115	0.0106668	0.00366505	0.0043597	0.00583764	0.00800063	0.00338262	0.0085622	0.0042271	0.00613179	0.00665403	0.00407468	0.00382625	0.00548151	0.00765413	0.0119274	0.00712055	0.00360284	0.0136046	0.00503646	0.00332885	0.00243446	0.0110145	0.0052162	0.00757356	0.00276436	0.00806682	0.00540016	0.00432973	0.0157464	0.00443129	0.00535469	0.0102462	0.00485399	0.0107285	0.00321717	0.0111058	0.00470175	0.005061	0.00755538	0.00205417	0.00512234	0.00564266	0.00428074	0.00188628
ENSG00000156876	0.0237815	NA	NA	NA	0.00832332	NA	NA	0.00852539	0.0375751	NA	0.00426776	NA	0.05658	0.0125976	0.00912047	0.00922269	0.0548659	0.0466437	0.0321088	NA	NA	NA	NA	0.0067327	0.0369918	0.0109932	NA	NA	0.0537961	0.0393792	0.042388	0.0099012	0.0303487	NA	NA	0.0552544	NA	0.0265604	NA	NA	0.0716991	0.0243331	NA	0.0545229	0.00887047	0.00654199	0.00756234	0.0289932	0.0368063
ENSG00000122435	0.00794202	0.00663738	2.54197e-05	0.0348117	0.00723454	0.0349058	0.0145273	0.00406917	0.00922352	0.00693045	0.00080552	0.0024194	0.00189808	0.00404299	0.0015017	0.00768675	0.00605412	0.00360159	0.00751443	0.00703537	0.00448301	0.0402212	0.0353413	0.00258285	0.00785862	0.00163515	0.00796251	0.0227856	0.00211638	0.00354616	0.0140899	0.00860826	0.00570171	0.109583	0.00367187	0.00870854	2.54197e-05	0.00572055	0.0207483	0.0118376	0.0203036	0.00348707	0.0124588	0.00788974	0.0039719	0.00608469	0.00349558	0.00858912	2.54197e-05
ENSG00000122477	0.0312566	0.0321528	NA	0.0686006	0.0144185	0.0358368	0.0353041	0.0347673	0.033319	0.0289507	0.00896471	0.029989	0.0216883	0.0156163	0.0129495	0.0181889	0.0349865	0.0451136	0.0394407	0.00631176	0.00681378	0.012448	0.0255103	0.0200924	0.0131594	0.0161878	0.0208255	0.0816367	0.0297053	0.0416727	0.0204614	0.0179501	0.0397826	NA	0.047539	0.0464993	0.0271016	0.00751336	0.0123953	0.00620255	0.0373445	0.0169813	NA	0.038425	0.026914	0.0245837	0.0398022	0.0478457	0.0281822
ENSG00000137992	0.0133138	0.0155742	0.00640021	0.0142213	0.005196	0.00194958	0.00764983	0.0122671	0.00849571	0.00674611	0.0022833	0.00776667	0.00654515	0.00122128	0.00604188	0.00983931	0.0145777	0.0261809	0.00672065	0.00993661	0.0101823	0.0167564	0.0308798	0.00763993	0.00821922	0.00423553	0.00510409	0.00553356	0.019309	0.00894632	0.0207334	0.0156473	0.0183612	NA	0.0029088	0.018656	0.00944964	0.00502161	0.0144922	0.00968339	0.00656266	0.00858336	5.6217e-05	0.0130639	0.00638829	0.0162346	0.00898279	0.00834116	0.00631836
ENSG00000137996	0.0333394	0.0285326	NA	0.0144348	0.016771	0.0133462	0.0245683	0.0293076	0.0204861	0.0463628	0.0445364	0.0167021	0.0101083	0.013138	0.00963626	0.0123193	0.0434551	0.0312532	0.0282842	0.0174601	0.0243621	0.0198347	0.0257163	0.0135601	0.0274304	0.0277023	0.0380183	0.0238266	0.0190597	0.0349234	0.00969222	0.0116556	0.0241632	0.0486949	0.0231968	0.0422168	0.020617	0.0126941	0.0220947	0.0195506	0.0159806	0.0109523	0.0121927	0.0332385	0.0175783	0.0193414	0.0189042	0.0191511	0.0207009
ENSG00000079335	0.00969767	0.0231448	NA	0.0477843	NA	NA	NA	0.0147996	0.0163265	0.00815108	0.008796	0.0558543	0.00784193	0.00787642	0.00299394	0.00860582	0.0104924	0.0187371	0.0155084	NA	0.0150548	NA	NA	0.0105249	0.0180651	0.0199141	2.54197e-05	NA	0.00858851	0.0113481	0.0202279	0.00732764	0.0124032	0.0537041	NA	0.0112504	NA	NA	NA	0.0332543	NA	0.0115527	2.54197e-05	0.00857041	0.00449745	0.00615793	0.0127514	0.00451705	0.0153863
ENSG00000162692	0.0322346	0.0065624	NA	NA	NA	NA	NA	0.0192189	0.00652536	0.00957683	NA	0.0401688	0.0896523	0.0122736	0.0122996	0.00638172	0.0145372	0.0130716	0.0296215	NA	0.05097	0.0253818	0.00215395	0.00959888	0.0095818	0.470444	0.0288733	0.00704924	0.024641	0.0112704	0.0505211	0.00207166	0.02244	NA	0.00716177	0.013029	NA	NA	NA	0.0373207	0.0579212	0.0358191	0.0123049	0.0127394	0.0332483	0.023771	0.0116214	0.0201234	0.00492012
ENSG00000162694	0.00973656	0.00554956	0.00957555	0.00481745	0.00342699	0.00598475	0.00219062	0.00492577	0.00482149	0.00555715	0.00558555	0.00209402	0.013333	0.0105118	0.00144638	0.00388457	0.00723551	0.00312	0.0104191	0.00190279	0.00263217	0.00228437	0.00297278	0.000270141	0.00601475	0.00164721	0.0068019	0.00289519	0.00656893	0.00233274	0.0147599	0.00205614	0.00386102	NA	0.00250966	0.00349645	0.00879144	0.00472994	0.00451504	0.00568235	0.00579313	0.00481588	0.00645028	0.00503645	0.00247057	0.00440417	0.00339171	0.00598981	0.00280313
ENSG00000162695	0.00432184	0.00655653	0.0110446	0.0490061	0.00651259	0.0295716	0.0162163	0.00387649	0.00544967	0.00446514	0.00199429	0.00616265	0.00342899	0.00170567	2.54197e-05	0.000348351	0.00573009	0.00656857	0.00509315	0.00509954	0.0194071	0.0171879	0.0138032	0.00374684	0.00902436	0.00367533	0.0081611	0.0120832	0.0069195	0.0121412	0.00677793	0.00312379	0.00637105	0.0102934	0.00608682	0.00615408	0.0037432	0.00732263	0.0242046	0.00220788	2.54197e-05	0.00396991	0.00715504	0.0030975	0.00931887	0.0070606	0.00287869	0.00228059	0.00641137
ENSG00000117543	0.0447248	0.0229784	NA	NA	0.016553	NA	NA	0.037991	0.0223208	0.0166991	0.00108721	0.0212629	0.0135021	0.00996775	0.00916734	0.0293139	0.0309609	0.0597674	0.0292603	NA	NA	NA	NA	0.0304998	0.0135234	0.00684493	0.0216579	NA	0.022005	0.0165772	0.0239508	0.0318484	0.0230174	NA	0.00999874	0.0703681	NA	0.0552072	NA	NA	NA	0.0160849	NA	0.0360528	0.00642886	0.010133	0.0137291	0.0348838	0.0345561
ENSG00000233184	0.0372164	0.0403048	NA	NA	0.0403842	0.0172437	0.0173034	0.0265373	0.0431588	0.0141667	0.0102998	0.0131393	0.0403464	0.019834	0.00374598	0.0410359	0.0118463	0.0406134	0.0527709	0.0499989	0.0276726	0.0303031	0.0615959	0.0347665	0.0427441	0.0115675	0.032853	0.0191614	0.0158132	0.0626231	0.0473546	0.0179726	0.0318667	0.0383599	0.0218074	0.0638831	0.0829043	0.0296289	0.0562141	0.0255426	NA	0.0293096	NA	0.0184584	0.0201306	0.0163026	0.0167466	0.0269137	0.0337834
ENSG00000225938	0.0192516	NA	NA	NA	NA	NA	NA	NA	NA	NA	0.0160628	NA	NA	NA	NA	NA	0.029135	0.0320866	0.0219892	NA	NA	NA	NA	NA	NA	NA	NA	NA	NA	NA	NA	0.0299345	NA	NA	NA	NA	NA	NA	NA	NA	NA	NA	NA	0.0401966	NA	NA	NA	NA	NA
ENSG00000170989	0.00583368	0.00608141	2.54197e-05	0.00475538	0.0103256	0.0022909	0.00243326	0.00252506	0.00513922	0.00707402	0.0135191	0.0154485	0.00498124	0.00474691	0.0281477	0.0177436	0.00405807	0.00662918	0.00500292	0.00660663	0.00296996	0.00369375	0.00255904	0.00586644	0.0076275	0.124552	0.00723994	0.0258134	0.00815418	0.0153155	0.0129731	0.00497751	0.0070983	0.00790634	0.0406965	0.00789645	0.00481	0.00484873	0.00230508	0.00152742	0.0180017	0.0117513	0.00943544	0.00733649	0.00361323	0.000548938	0.00421358	0.00381658	0.00837926
ENSG00000060718	0.0852484	NA	NA	0.00725186	NA	0.0169037	0.0317779	0.0494558	NA	NA	NA	NA	0.025186	NA	0.00343312	NA	NA	NA	0.337671	0.0117025	0.00501599	0.0137743	0.0106341	0.0335805	NA	0.0660004	NA	NA	0.034507	NA	0.0461693	0.0480487	NA	NA	0.0373287	0.0465952	0.00721571	0.0182412	0.00789161	0.0117882	0.0113887	NA	NA	0.0720769	0.0494502	0.0306437	NA	NA	NA
ENSG00000185946	0.00721582	0.00511575	0.0169413	0.00527115	0.00467288	0.00419608	0.00261752	0.0046902	0.00694717	0.00442294	0.00142132	0.00738	0.00628327	0.00750813	0.00295876	0.00442656	0.00993892	0.00376582	0.0097122	0.00695729	0.00268203	0.00461469	0.00286446	0.00360327	0.00382945	0.00327653	0.00599056	0.00908847	0.00533186	0.00670532	0.0055748	0.00447692	0.0056684	0.0114013	0.00611591	0.00603253	0.00351888	0.00344775	0.00628128	0.00485153	0.0101759	0.00487296	0.0118069	0.00676908	0.00276511	0.00325008	0.00326847	0.00566053	0.00456707
ENSG00000240038	0.0867978	0.0797953	0.0534258	0.0691711	0.0653256	0.12063	0.06889	0.0713442	0.105664	0.078715	0.106384	0.107069	0.0697297	0.111418	0.115945	0.117779	0.135091	0.064006	0.0730601	0.0692957	0.0497145	0.0596938	0.0934599	0.0761657	0.0969188	0.100121	0.100998	0.102407	0.0866605	0.111861	0.0688821	0.174102	0.112554	0.133064	0.0954549	0.085802	0.106133	0.0518203	0.0789826	0.0552887	0.0560451	0.117781	0.161185	0.0937918	0.0861121	0.0917802	0.053183	0.0914097	0.095153
ENSG00000198890	0.0242675	0.00570506	NA	0.0225906	0.0104558	0.0269475	2.54197e-05	0.00703401	0.0185968	NA	0.00641972	0.00763001	0.0733417	0.0209093	0.00186018	0.0269827	0.0114932	0.021814	0.0186581	0.00272881	0.0296322	0.00775783	0.0398652	0.0140999	0.0148875	0.00705275	NA	0.893867	0.028496	0.0288491	0.0884429	0.0182192	0.0111081	NA	0.0132073	0.0306972	0.0293946	0.0222506	0.0172952	0.0217335	0.0269916	0.0396342	0.0214678	0.0214882	0.00877093	2.54197e-05	0.0308914	0.0150007	0.0237422
ENSG00000162631	0.175685	NA	0.0737009	0.0101619	0.0222453	0.042953	NA	0.121596	0.219392	NA	0.249787	NA	0.0993374	NA	0.00238309	0.0755198	0.0365737	NA	NA	0.0394377	0.0110766	0.00991595	0.0130769	0.175257	0.173888	0.045861	NA	NA	0.0231773	0.0499246	0.164815	NA	NA	NA	0.0141446	0.209879	0.0135019	0.024628	0.00952948	0.0196734	0.00627707	NA	0.00780534	0.0232022	NA	0.011797	NA	NA	NA
ENSG00000134215	0.0187172	0.0145563	2.54197e-05	0.0382585	0.0148181	NA	0.0146722	0.0264518	NA	0.00940467	NA	0.00611349	0.004858	0.00700958	0.0100718	0.0047462	0.020682	0.0221494	0.0087927	0.0194591	0.0329895	0.0179037	0.0152824	0.00518883	0.0355976	NA	0.0856705	NA	0.0510244	0.0125966	0.00554854	0.0080183	0.0252787	0.0111358	2.54197e-05	0.0410763	0.017168	0.022196	0.0158982	0.0132861	NA	0.00366211	0.00705774	0.0124454	NA	0.0295238	0.0101232	0.0127182	0.00339094
ENSG00000085491	0.00715009	0.00609722	0.00492382	0.0853948	0.273796	0.0761157	0.0405617	0.00983146	0.00571604	0.00745429	0.400141	0.0138903	0.0128135	0.00228854	0.026847	0.0139504	0.00552804	0.00807235	0.00574291	0.0348003	0.0347608	0.0561522	0.019742	0.00353495	0.00605054	0.00467656	0.0118185	0.0145938	0.00516292	0.00383186	0.011895	0.00656164	0.00639929	0.0359416	0.0118738	0.00730916	0.0536574	0.17603	0.0539606	0.0601734	0.0194415	0.0189021	0.0125644	0.00962015	0.00751731	0.0141073	0.0101623	0.00939132	0.00143876
ENSG00000162636	0.0219677	0.0222071	2.54197e-05	0.067399	0.0308978	0.0480441	0.0529643	0.0244814	0.026648	0.0193735	0.0410012	0.0353641	0.0491727	0.0135576	0.0309725	0.0264175	0.0175592	0.0127377	0.0229703	0.0402317	0.0344003	0.051245	0.0732241	0.0185662	0.0308988	0.0115019	0.0426928	NA	0.0248078	0.0280458	0.027128	0.0270063	0.01495	0.0698407	0.0291281	0.0160428	0.0942759	0.0199768	0.0435388	0.0309557	0.0425592	0.0117831	NA	0.0282978	0.117495	0.0114601	0.00496179	0.0247733	0.076751
ENSG00000134186	0.0127896	0.00256639	NA	0.00160691	0.00251639	2.54197e-05	0.0124151	0.00317434	0.0033673	0.00271674	2.54197e-05	0.00861838	0.00803399	0.00346217	0.00342737	0.00956583	0.00567373	0.00525844	0.00478462	0.0174144	2.54197e-05	0.00609916	0.00764069	2.54197e-05	0.00164246	0.00508234	0.00598766	0.00567726	0.00970498	0.00577095	0.00685981	0.00565231	0.00128167	0.0203613	2.54197e-05	0.00579997	0.0121496	0.00320454	0.00218662	0.00615809	0.00611277	0.00602372	0.0197762	0.00383176	0.00331429	0.00352697	0.00567111	0.00113085	2.54197e-05
ENSG00000116266	0.00447246	0.000909612	0.00199912	0.00500425	0.000822233	0.00228495	0.00204782	0.00283829	0.00103169	0.00122889	0.000167007	0.00198309	0.00299303	0.00241152	0.00234604	0.0019468	0.00216101	0.00279088	0.00376772	0.00206999	0.00236166	0.00422499	0.0017316	0.00290414	0.00229158	0.00412061	0.00320624	0.00417469	0.0015032	0.00296714	0.00428838	0.00304347	0.00155139	0.00608367	0.000926456	0.00207947	0.0027784	0.00115144	0.00293053	0.00174648	0.00359734	0.00474857	0.00456746	0.00175006	0.000514716	0.00393987	0.00279274	0.00299465	0.00126981
ENSG00000162641	0.0704474	NA	NA	NA	NA	NA	NA	NA	0.0405156	NA	NA	NA	0.0911139	NA	0.00901083	NA	NA	NA	0.067923	NA	NA	NA	NA	NA	0.0362322	NA	NA	NA	0.0633672	NA	0.105676	NA	NA	NA	NA	NA	NA	NA	NA	NA	NA	NA	NA	NA	NA	0.0551292	NA	NA	NA
ENSG00000121957	0.00922939	0.00876446	0.00565649	0.00814307	0.00826407	0.00585666	0.00779813	0.0100298	0.00944722	0.00892001	0.00653262	0.00919497	0.00875842	0.00839581	0.00541805	0.0123419	0.00786288	0.00856104	0.00835028	0.00772498	0.00837964	0.00709601	0.00626827	0.00837536	0.00948452	0.00600337	0.0133607	0.0121457	0.00885367	0.00787856	0.00956367	0.00868466	0.0109272	0.0139317	0.00942071	0.0101251	0.00903913	0.00768637	0.00734374	0.00676415	0.00497002	0.00750302	0.00969484	0.00536695	0.00983216	0.00902765	0.00846538	0.00883531	0.00797122
ENSG00000121940	0.00577099	0.0041965	0.00534676	0.0133564	0.00700329	0.00974699	0.010021	0.0100503	0.0103894	0.00418917	0.00556807	0.00513408	0.00983337	0.00537435	0.00340703	0.00898021	0.00431859	0.00459495	0.00632948	0.0107916	0.00910016	0.0112368	0.0105443	0.00752726	0.00951625	0.00553031	0.00612778	0.00547001	0.0070651	0.00492675	0.0139333	0.00637168	0.00573037	0.0172487	0.00518256	0.00563576	0.0104577	0.00882341	0.00816893	0.00734002	0.00975896	0.00904364	0.00543033	0.00478604	0.00444899	0.00435622	0.0068093	0.00622362	0.00538037
ENSG00000085433	0.0528499	0.0188499	0.00630542	0.012336	0.00453328	0.00845645	0.00692742	0.0333961	0.0381148	0.0415031	0.109853	0.152129	0.0124848	0.0464774	0.00595872	0.0195477	0.0535613	0.0165211	0.0657238	0.00416422	0.00287636	0.0054447	0.020779	0.0293633	0.032802	0.0450963	0.0106161	0.0363441	0.0221962	0.0644222	0.0122789	0.0526033	0.0479093	0.0229848	0.0596135	0.0272963	0.00470884	0.00398373	0.00465727	0.00656282	0.0213676	0.019681	0.0176901	0.0355681	0.0860142	0.0151888	0.0275128	0.060177	0.00446134
ENSG00000244716	0.893867	NA	NA	NA	NA	NA	NA	NA	NA	NA	NA	0.893867	NA	NA	NA	NA	NA	NA	NA	NA	NA	NA	NA	NA	NA	NA	NA	NA	NA	NA	NA	NA	NA	NA	NA	NA	NA	NA	NA	NA	NA	NA	NA	NA	0.893867	NA	NA	NA	NA
ENSG00000197780	0.00386851	0.00356052	0.0132466	0.0142439	0.00357903	0.00430404	0.00393579	0.00336253	0.00339123	0.00265391	0.00127529	0.00416429	0.00400043	0.00410487	0.0031023	0.00374281	0.00371341	0.00650383	0.00304605	0.00349159	0.00533237	0.00235456	0.00285467	0.0029539	0.00507095	0.00786269	0.0016683	0.00751004	0.00295796	0.00377634	0.00652463	0.00304126	0.00563856	0.0150788	0.00546801	0.00635041	0.00325021	0.00487562	0.00317345	0.00457731	0.00587071	0.00303048	0.00234717	0.00404157	0.00367677	0.00214128	0.0020253	0.00463212	0.00807973
ENSG00000215717	0.00184058	0.00344834	NA	0.00478485	0.00322238	0.0100396	0.00217428	0.00220846	0.00421111	0.00495588	0.00340598	0.00835803	0.00535386	0.00573118	2.54197e-05	0.00207473	0.00493025	0.00397276	0.00212257	0.00336236	0.002572	0.00179601	0.0135821	0.00207478	0.00401025	0.00268501	0.00840047	0.00423898	0.00275128	0.00620127	0.0041526	0.00684178	0.00549293	0.00772703	0.00171011	0.00361548	0.00604435	0.00448099	0.00720542	0.00124675	0.00325639	0.00416811	0.0061184	0.00431955	0.000297735	0.00352267	0.00669923	0.00482054	0.00302171
ENSG00000116299	0.080632	NA	NA	0.00423941	0.0101795	0.00994434	0.0115955	0.0144018	NA	NA	NA	0.00252349	0.00396456	0.00311291	0.00255465	NA	0.172442	NA	0.0052401	0.00311728	0.00184715	0.00010565	0.0133657	0.00551325	NA	NA	NA	NA	NA	0.00218031	0.00378641	0.14677	0.0889805	0.672522	0.0663586	NA	0.00847914	0.0134496	0.00790771	0.000480149	0.00323514	0.00566245	NA	0.042891	NA	0.00248343	0.00295304	0.00471577	2.54197e-05
ENSG00000031698	0.0138833	0.0175632	2.54197e-05	0.0293514	0.0173634	0.0186148	0.00863898	0.0126735	0.0134559	0.0148456	0.0352329	0.0211046	0.0149207	0.0223873	0.0165122	0.0117785	0.0171376	0.0181595	0.0194415	0.0195004	0.0100152	0.035784	0.0168085	0.0169738	0.0251739	0.0332959	0.0101977	0.00574866	0.0163218	0.024728	0.0194139	0.0197915	0.0190581	0.0226347	0.033258	0.0252078	0.0165362	0.0128826	0.0215612	0.0159831	0.0212497	0.0155951	0.0275013	0.0120775	0.0129216	0.0158557	0.0316961	0.0287047	0.0135286
ENSG00000143126	0.0187655	0.0193171	0.00928649	0.00169084	0.00191086	0.00251517	0.000947483	0.00417951	0.00360873	0.00268349	NA	0.0102039	0.00400455	0.00743889	0.00303387	0.00811842	0.00492017	0.015661	0.00832155	0.000771122	0.0015817	0.00279553	0.00397743	0.00524936	0.00539744	NA	0.00701811	0.615826	0.00305299	0.00945074	0.00487983	0.0431554	0.00320054	0.0862376	0.00904701	0.00869412	0.00162893	0.00239422	0.000791158	0.00142303	0.00703277	0.00884693	0.00808063	0.0128904	0.0286625	0.00432143	0.0144963	0.00431148	0.0059206
ENSG00000134222	0.0545391	0.0476257	NA	0.033969	0.035053	0.0330449	0.0302256	0.0920928	0.0174566	0.056297	0.0337149	NA	0.0462508	0.00131731	0.0213406	0.0512766	0.0464947	0.0512951	0.0420408	0.0210626	0.028366	0.0297018	0.0389763	0.0409198	0.0170254	0.0126328	NA	0.861135	0.0204162	0.053562	0.0364126	0.0166378	0.0530743	0.0313381	NA	0.0424642	0.0389284	0.0481636	0.0333068	0.0339154	0.0898492	0.0277347	NA	0.0312193	0.106955	0.0444016	NA	0.0177632	0.0588031
[truncated: 26,026 more rows]
[truncated: 2 more columns]

## Sheet: legend
Supplemental Table S3: Table of all VGH estimates. VGH as generated from GTEx v8 for 50 tissues and the weighted harmonic mean of all tissues.
gene_id	Ensembl gene id
ADPSBQ	VGH in Adipose - Subcutaneous
ARTAORT	VGH in Artery - Aorta
BLDDER	VGH in Bladder
BRNAMY	VGH in Brain - Amygdala
BRNCHB	VGH in Brain - Cerebellum
BRNHPP	VGH in Brain - Hippocampus
BRNPTM	VGH in Brain - Putamen (basal ganglia)
CLNSGM	VGH in Colon - Sigmoid
[truncated: 43 more rows]
