# Supplementary material for: Recalibrating differential gene expression by genetic dosage variance prioritizes functionally relevant genes
Source: Genome Res. 2025 Oct;35(10):2316–25. doi: 10.1101/gr.280360.124 (PMC12487816; doi:10.1101/gr.280360.124)
Supplement: Supplement 5 [file Supplemental_Table_S4.xlsx]

## Sheet: Supplemental Table S4
gene_id	ADPSBQ	ARTAORT	BLDDER	BRNAMY	BRNCHB	BRNHPP	BRNPTM	CLNSGM	ESPMSL	HRTAA	LCL	PNCREAS	SKINNS	SNTTRM	TESTIS	VAGINA	ADPVSC	ARTCRN	BREAST	BRNCDT	BRNCTXA	BRNHPT	BRNSNG	CLNTRN	ESPGEJ	FIBRBLS	HRTLV	LIVER	NERVET	PRSTTE	SKINS	SPLEEN	THYROID	WHLBLD	ADRNLG	ARTTBL	BRNACC	BRNCHA	BRNCTXB	BRNNCC	BRNSPC	ESPMCS	KDNCTX	LUNG	OVARY	PTTARY	SLVRYG	STMACH	UTERUS
ENSG00000227232	0.591959	0.570454	0.701036	0.545778	0.48473	0.567522	0.704379	0.862209	0.698337	0.737465	0.669428	0.661173	0.565015	0.757484	0.728967	0.40264	0.599542	0.856472	0.755454	0.432776	0.538822	0.512521	0.633992	0.721148	0.553934	0.51769	0.694623	0.575581	0.629331	0.638118	0.616665	0.598885	0.678079	0.740876	0.773127	0.706385	0.61704	0.52268	0.620426	0.597249	0.668931	0.671923	0.554649	0.758911	0.547268	0.624111	0.781936	0.693653	0.686357
ENSG00000268903	0.893867	0.893867	0.790002	0.893867	0.893867	0.89675	0.893867	0.893867	0.893867	0.893867	1.39938	0.634813	0.798637	0.893867	0.402871	0.893867	0.62153	0.893867	0.893867	0.922764	0.893867	0.717653	0.82984	0.893867	0.893867	1.84564	0.707186	0.893867	0.893867	0.893867	0.734535	0.393033	0.893867	0.893867	0.893867	0.893867	0.893867	0.893867	0.893867	0.893867	0.893867	0.667042	0.893867	0.441764	0.893867	0.893867	0.678824	0.893867	0.893867
ENSG00000279457	0.799917	0.670462	0.579451	0.780284	0.570595	0.795464	0.769507	0.564706	0.466877	0.787488	0.682662	0.738367	0.469679	0.614579	0.57585	0.594465	0.621669	0.657653	0.605468	0.893826	0.708201	0.733573	0.792056	0.531369	0.893867	0.737278	0.824126	0.723178	0.626234	0.361277	0.50157	0.656172	0.629392	0.429272	0.756669	0.354925	0.729114	0.530042	0.629036	0.783361	0.712468	0.50831	0.630256	0.314741	0.599985	0.520049	0.591153	0.613545	0.535911
ENSG00000230021	0.893867	0.640663	0.487686	0.893867	0.893867	0.893867	0.893867	0.893867	0.893867	0.893867	0.662878	0.893867	0.893867	0.893867	0.784613	0.434331	0.893867	0.893867	0.893867	0.935528	0.893867	0.893867	0.893867	0.893867	0.893867	0.857723	0.893867	0.92596	0.583031	0.893867	0.893867	0.893867	0.893867	0.893867	0.893867	0.738609	0.893867	0.893867	0.893867	0.893867	0.893867	0.893867	0.893867	0.893867	0.243212	0.802768	0.893867	0.893867	0.359241
ENSG00000237973	0.893867	0.893867	0.92721	0.879361	0.893867	0.847638	0.893867	0.893867	0.893867	0.893867	1.07824	1.09338	0.893867	0.815898	0.893867	0.975725	0.893867	0.920145	0.893867	0.893867	0.893867	0.893867	0.90738	0.893867	0.893867	0.936646	0.893867	0.893867	0.992593	0.893867	0.893867	0.875699	0.893867	1.2917	0.893867	0.893867	0.890309	0.893867	0.903244	0.893867	0.996808	0.893867	0.743294	0.893867	1.03575	1.13615	0.920554	0.893867	0.953144
ENSG00000229344	0.893867	1.02535	0.927307	0.893867	0.893867	0.893867	0.893867	0.893867	0.893867	0.893867	0.893867	0.893867	0.893867	0.893867	0.893867	0.955614	0.893867	0.968217	0.893867	0.893867	0.893867	0.893867	0.893867	0.893867	0.893867	0.893867	0.893867	0.893867	0.893867	0.893867	0.893867	0.893867	0.893867	0.893867	0.893867	0.893867	0.893867	0.893867	0.893867	0.893867	0.893867	0.893867	0.893867	0.893867	1.04323	0.893867	0.893867	0.893867	0.991836
ENSG00000198744	0.893867	1.03939	0.970966	0.893867	0.893867	0.893867	0.893867	0.893867	0.893867	0.893867	1.09543	1.09369	0.893867	0.893867	0.893867	0.984772	0.893867	0.965514	0.893867	0.893867	0.893867	0.893867	0.893867	0.893867	0.893867	1.07006	0.893867	0.893867	0.96706	0.893867	0.893867	1.01702	0.893867	1.27046	0.893867	0.893867	0.893867	0.893867	0.893867	0.893867	0.893867	0.893867	0.893867	0.893867	1.03923	0.961002	0.924038	0.893867	1.00796
ENSG00000228327	0.143391	0.120542	0.107394	0.155265	0.124979	0.163799	0.15558	0.101985	0.104538	0.139501	0.0866334	0.121995	0.0956998	0.0825583	0.111771	0.106296	0.0931196	0.118495	0.0922859	0.152263	0.155263	0.145425	0.139352	0.0990194	0.109406	0.0891177	0.159148	0.132834	0.0830542	0.129643	0.165685	0.132385	0.0932531	0.12383	0.108833	0.116908	0.164681	0.118969	0.158436	0.161673	0.126694	0.128387	0.127562	0.10967	0.0990806	0.142384	0.106994	0.110739	0.0927397
ENSG00000237491	0.0776387	0.108148	0.0578874	0.0820184	0.057972	0.0106501	0.0605012	0.041844	0.0647242	0.0436967	0.0380776	0.0593092	0.0630653	0.0529197	0.0801109	0.0348253	0.068527	0.10464	0.0588476	0.117092	0.134796	0.0319599	0.0719684	0.0738373	0.0591449	0.0673456	0.0406507	0.158269	0.0760893	0.042156	0.0781074	0.0513296	0.0427709	0.12099	0.0288398	0.124451	0.068938	0.0772075	0.0706659	0.0627464	0.0530773	0.0510681	0.0712542	0.100668	0.0368546	0.0915627	0.0494423	0.0400756	0.0297319
ENSG00000230092	0.101056	0.0801602	0.0730814	0.124375	0.0851737	0.129358	0.111003	0.0846441	0.0649323	0.0966568	0.0375635	0.0959713	0.0733703	0.109499	0.109166	0.0843883	0.112503	0.0705105	0.0562468	0.109771	0.11298	0.105491	0.119785	0.0559593	0.0625898	0.0744847	0.101845	0.102095	0.10438	0.10805	0.112267	0.0467327	0.0548875	0.101835	0.0752867	0.0933371	0.109121	0.0965196	0.109837	0.135206	0.113831	0.0665876	0.120005	0.132232	0.04293	0.0735265	0.0664331	0.0799516	0.0440344
ENSG00000177757	0.0793424	0.0767202	0.0867756	0.10256	0.0622836	0.124248	0.104047	0.0919635	0.0982474	0.10468	0.0649456	0.103248	0.051951	0.0786378	0.0214525	0.0708951	0.0898261	0.082198	0.0413111	0.0992241	0.108639	0.0929661	0.114611	0.0762241	0.087739	0.0236739	0.118585	0.0975586	0.0475744	0.0799191	0.0643059	0.0882525	0.0470219	0.131299	0.0531553	0.100092	0.107876	0.0504279	0.104854	0.100358	0.108076	0.0774484	0.0867286	0.0753147	0.0688503	0.0749928	0.0657266	0.0954591	0.0833281
ENSG00000228794	0.0395124	0.0391999	0.0582226	0.02996	0.0773264	0.0342642	0.0266178	0.021178	0.029354	0.018931	0.0344516	0.0485312	0.0196698	0.00802399	0.0395324	0.0677349	0.0158365	0.0578861	0.0235869	0.032496	0.00923758	0.00432464	0.00503742	0.0381988	0.0261196	0.0138838	0.014917	0.0741163	0.0567594	0.0512549	0.0271248	0.042521	0.0375273	0.0327343	0.0215543	0.035662	0.016634	0.0812635	0.00816902	0.032476	0.088428	0.0244174	0.0788528	0.0311936	0.0440044	0.0432383	0.0215418	0.0281399	0.0589575
ENSG00000225880	0.0522503	0.0471765	0.0435756	0.0635827	0.102537	0.0626188	0.0642289	0.043629	0.0575593	0.0473944	0.0620945	0.0385063	0.042683	0.0129996	0.0247009	0.0525714	0.0368679	0.0823945	0.038899	0.0741977	0.0709532	0.0574365	0.0571426	0.0534607	0.0459347	0.0342395	0.0701469	0.0631741	0.0363402	0.0575001	0.0571876	0.0745033	0.037568	0.053828	0.0372992	0.0453903	0.0645879	0.0544171	0.0857867	0.0429957	0.0336065	0.0504928	0.0416596	0.0528612	0.0486872	0.0464476	0.0225036	0.0741542	0.0881352
ENSG00000223764	0.0570125	0.0267273	0.0100305	0.0986547	0.0807091	0.060203	0.0845794	0.0312519	0.083242	0.00577307	0.039518	0.0197964	0.12268	0.0238797	0.0200928	0.0184963	0.0563283	0.0286226	0.0321677	0.0792371	0.0858368	0.0847495	0.0920157	0.0110318	0.0623059	0.0239231	2.54197e-05	0.021743	0.0468148	0.0148848	0.160017	0.0050115	0.0297795	0.0801057	0.00360658	0.0179841	0.0789911	0.0847731	0.0931854	0.0836336	0.0684683	0.0586296	0.00852253	0.0102971	0.022257	0.0061173	0.069062	0.0341616	0.0490056
ENSG00000188976	0.00979221	0.00838132	0.0131062	0.014652	0.00615203	0.016738	0.0102793	0.00836558	0.00936197	0.00893025	0.00463926	0.0115767	0.0117304	0.00512016	0.00431199	0.00552834	0.00908124	0.00946871	0.0118613	0.00789258	0.00940976	0.00941083	0.0129116	0.00807689	0.00669279	0.00510653	0.00893629	0.0130701	0.011248	0.00735499	0.0107913	0.0108629	0.0133617	0.0104235	0.00887198	0.00823732	0.0119402	0.00531325	0.00889867	0.00780613	0.0184252	0.00930303	0.00341966	0.00875206	0.00947938	0.00829723	0.0114751	0.00857571	0.0104307
ENSG00000187961	0.0130986	0.00249747	0.0307431	0.0103576	0.0021329	0.0141246	0.0169883	0.013268	0.0109548	0.00510558	0.0145396	0.00649804	0.0123198	0.00190397	0.00853741	0.0114651	0.0126006	0.0120147	0.0150116	0.0195563	0.0070806	0.0155462	0.0112923	0.00801096	0.00459311	0.00974215	0.000953936	0.000556103	0.00945852	0.00976428	0.019019	0.00454848	0.00605648	0.0302731	0.0116914	0.0137312	0.0178497	0.00420526	0.00749649	0.00404005	0.0192351	0.0149418	0.00470657	0.00956165	0.0208844	0.00483954	0.00466921	0.0121175	0.00990123
ENSG00000187642	0.144459	0.138793	0.0768862	0.152831	0.148755	0.153041	0.146916	0.148816	0.144809	0.0240794	0.111257	0.107884	0.0119102	0.11225	0.435303	0.0122249	0.11216	0.106995	0.0776864	0.151529	0.153214	0.151672	0.163999	0.146318	0.144483	0.114288	0.0153903	0.108889	0.131221	0.138274	0.00992449	0.0966532	0.140812	0.0551633	0.122266	0.127259	0.0964549	0.187682	0.112031	0.161381	0.169542	0.0424145	0.106319	0.11664	0.160457	0.163756	0.00824569	0.129646	0.0872469
ENSG00000272512	0.372539	0.7435	0.383963	0.185778	0.448197	0.2339	0.297408	0.492889	0.503433	0.151618	0.925163	0.454338	0.44488	0.527949	0.567237	0.415412	0.267595	0.429223	0.399708	0.400424	0.283647	0.217044	0.162241	0.524724	0.505685	1.33628	0.0921027	0.595493	0.321334	0.557526	0.394487	0.641151	0.495052	1.17392	0.595033	0.326423	0.3948	0.392465	0.247891	0.319291	0.320181	0.311733	0.578845	0.564597	0.552026	0.382457	0.457252	0.596241	0.556059
ENSG00000188290	0.506826	0.565381	0.61961	0.809508	0.767597	0.562365	0.571079	0.642155	0.659231	0.489496	0.698183	0.566147	0.588395	0.599603	0.238667	0.458886	0.556484	0.513948	0.638407	0.527959	0.453396	0.450415	0.729001	0.504049	0.680259	1.30178	0.467298	0.791727	0.557733	0.528505	0.55068	0.490528	0.431981	0.65603	0.995164	0.470935	0.710453	0.732776	0.440222	0.558551	0.704374	0.670057	0.659646	0.467516	0.647367	0.624481	0.45332	0.535321	0.703988
ENSG00000187608	0.0124804	0.00880194	0.0690791	0.00960894	0.00294483	0.0132379	0.00648885	0.0108835	0.00777016	0.00616293	0.0114873	0.0300695	0.0129762	0.0483947	0.00921149	0.0109118	0.0104249	0.0118337	0.0117222	0.0109914	0.00689931	0.00448187	0.00659349	0.0150695	0.00869863	0.0329916	0.00847689	0.0120472	0.00974262	0.0123935	0.0192817	0.0304169	0.00850935	0.0932853	0.0120266	0.0105786	0.0134834	0.013972	0.00997404	0.00703034	0.00334645	0.00858978	0.00958167	0.00867796	0.0115414	0.0112409	0.0154634	0.0143791	0.0148733
ENSG00000188157	0.0117787	0.0117371	0.00444891	0.0049174	0.0088364	0.00441523	0.00507348	0.0116397	0.013604	0.0125002	0.0069322	0.00351885	0.00417089	0.00540084	0.00161187	0.00651921	0.0181901	0.0140364	0.00959834	0.00279963	0.00172722	0.00398047	0.00606043	0.00820077	0.0123233	0.0156826	0.0111048	0.00780872	0.00760282	0.00475936	0.00398148	0.0142375	0.00448675	0.0339073	0.0164898	0.0130485	0.00242925	0.00459604	0.00154913	0.00346912	0.00712	0.00271798	0.0036986	0.00478886	0.00943402	0.00701086	0.00291371	0.0078763	0.0100865
ENSG00000131591	0.00548113	0.0100852	0.0169558	0.0216618	0.014481	0.020364	0.0184511	0.00845375	0.00736593	0.0122446	0.00477281	0.0149326	0.00738506	0.0047195	0.00301706	0.00640614	0.00981954	0.0104227	0.00786087	0.0254541	0.0153519	0.0128082	0.0110461	0.00565	0.0117398	0.00743161	0.0107364	0.0049981	0.00940571	0.00661374	0.00660587	0.00729388	0.0115628	0.0114292	0.00772774	0.00818071	0.0171924	0.0188632	0.0244765	0.0348026	0.0136599	0.00689558	0.00968369	0.00746116	0.0172123	0.0151344	0.00604797	0.00689708	0.00977352
ENSG00000205231	0.0728164	0.193752	0.133797	0.263732	0.330143	0.268464	0.290967	0.161348	0.178216	0.175237	0.266207	0.132658	0.128096	0.122419	0.00547887	0.133059	0.0404096	0.14906	0.0457048	0.680831	0.299813	0.236465	0.306757	0.134484	0.171283	0.225577	0.150123	0.166885	0.141483	0.129889	0.141453	0.156265	0.139393	0.246464	0.160492	0.178636	0.295935	0.351045	0.299909	0.297297	0.305569	0.135083	0.136191	0.0699211	0.193701	0.208835	0.143024	0.140061	0.163979
ENSG00000162571	0.028944	0.0546282	0.0328119	0.0932532	0.118205	0.084134	0.0936914	0.0448808	0.0475707	0.0476293	0.137843	0.0384607	0.0406617	0.0351123	0.00781599	0.0554223	0.015163	0.0445793	0.0168973	0.186899	0.106762	0.0709834	0.100908	0.0691705	0.047532	0.098716	0.0402198	0.0451901	0.0449897	0.0339295	0.0837473	0.0464376	0.0398514	0.0717151	0.0460848	0.0552813	0.0941162	0.118285	0.099504	0.101572	0.0919578	0.12061	0.0343712	0.0158784	0.0533988	0.049449	0.0546508	0.0363626	0.0403819
ENSG00000186891	0.241718	0.182809	0.120829	0.212958	0.224254	0.252739	0.275842	0.150276	0.177196	0.18487	0.102477	0.144244	0.0239751	0.0791953	0.0608566	0.0862192	0.114932	0.135583	0.103229	0.290805	0.148095	0.215588	0.181877	0.0325576	0.177651	0.198992	0.190968	0.157993	0.174655	0.15461	0.0395703	0.105846	0.115803	0.128529	0.171914	0.260468	0.183288	0.152599	0.142987	0.299696	0.162593	0.0791092	0.182862	0.0853789	0.179001	0.0450149	0.0234083	0.0517411	0.152487
ENSG00000186827	0.0111049	0.0263791	0.0239155	0.0281223	0.0142126	0.0306198	0.0302386	0.0245997	0.0287899	0.0062048	0.0512412	0.0304515	0.0259257	0.0029522	0.0235972	0.0185649	0.0132278	0.0230357	0.0158686	0.0247148	0.0253585	0.0298143	0.033894	0.00600245	0.0275536	0.0474966	0.00844078	0.0309645	0.0262764	0.0172646	0.0312671	0.00268281	0.0128384	0.0298754	0.0302801	0.0486601	0.0289752	0.0224831	0.0310699	0.0319697	0.0273974	0.0248727	0.0255224	0.0226872	0.0267462	2.54197e-05	0.0235145	0.0318553	0.0237874
ENSG00000078808	0.00366202	0.00909522	0.00240036	0.000243223	0.00695947	0.00473741	0.00403456	0.00371867	0.00300576	0.00402929	0.00321664	0.0038931	0.00315272	0.00273083	0.00293485	0.0047886	0.004677	0.00482364	0.00294094	0.00199839	0.0109526	0.00215727	0.00234438	0.00297154	0.00367616	0.0040696	0.00304926	0.00245866	0.00439953	0.00291563	0.00248757	0.00366495	0.00275524	0.00491013	0.00375642	0.00432609	0.00736727	0.00835582	0.0083701	0.00612827	0.00209519	0.00217508	0.00147133	0.00312414	0.00538834	0.00223263	0.00712437	0.00310319	0.00453537
ENSG00000176022	0.0317296	0.017472	0.0180787	0.0216137	0.0290326	0.020661	0.0258842	0.0102867	0.0196656	0.0143153	0.019912	0.01551	0.0240514	0.0258167	0.0188941	0.00908054	0.0117627	0.01653	0.0209345	0.0216544	0.00968906	0.0246585	0.0103406	0.0277974	0.0170317	0.0151114	0.0175962	0.00781279	0.0552737	0.0234907	0.0328311	0.0120662	0.0193699	0.0333882	2.54197e-05	0.0202849	0.0178358	0.0610743	0.00962975	0.0122958	0.0501288	0.0157942	0.0263442	0.0175737	0.0116575	0.00730998	0.0117749	0.0222853	0.0242242
ENSG00000184163	0.0182389	0.0176253	0.0298714	0.0211085	0.00991551	0.0352348	0.029753	0.0361576	0.0388052	0.074251	0.00353301	0.0343299	0.0376171	0.0122064	0.0279534	2.54197e-05	0.088343	0.0346858	0.0336156	0.0307046	0.0356353	0.0128918	0.0484185	0.0151884	0.0199695	2.54197e-05	0.11768	0.0323762	0.00778778	0.0233629	0.0154069	0.0282712	0.0231865	0.0117695	0.0586472	0.0228988	0.0195377	0.000344674	0.0191969	0.0390917	0.0265859	0.0341186	0.00963039	0.0173502	0.030432	0.0642693	0.0407742	0.0264124	2.54197e-05
ENSG00000160087	0.00690593	0.0101525	2.54197e-05	0.00111259	0.00267265	0.0093224	0.00386408	0.00301007	0.00454538	0.00151418	0.0031068	0.00574646	0.00516324	0.00682877	0.00478275	0.00318354	0.00542292	0.00463409	0.00837501	0.00739388	0.000835455	0.00230909	2.54197e-05	0.00569248	0.0033938	0.00340281	0.00367183	0.00960868	0.00566259	0.00483712	0.0128365	0.00619203	0.00659707	0.0157192	0.00595284	0.00903626	0.000528306	0.00364678	0.00115455	0.00693182	0.000653036	0.00868206	0.0311746	0.00772712	0.00644595	0.00513108	0.0023296	0.00578823	0.0142306
ENSG00000230415	0.0153543	0.0242306	0.0224526	0.0287996	0.0110645	0.0205413	0.0268126	0.0171251	0.0329317	0.00588554	0.0288509	0.0139718	0.0872528	0.0316443	0.00732777	0.0382485	0.033611	0.0280201	0.032195	0.00397506	0.0330601	0.0216795	0.0246735	0.015696	0.014118	0.0341425	0.0170021	0.0420345	0.0272915	0.0383012	0.0791165	0.0298926	0.00317801	0.043735	0.00959444	0.0635969	0.0355957	0.0160288	0.0149647	0.0182204	0.028451	0.0222011	0.028345	0.0201783	0.0117224	0.0207613	0.0317898	0.0272733	0.0212512
ENSG00000162572	0.0190041	0.0368069	0.018096	0.0166862	0.0158913	0.0124061	0.010356	0.0535893	0.0358498	0.0420648	0.0198308	0.0226883	0.0548823	0.0295223	0.00916635	0.0278479	0.0314125	0.0189428	0.0256821	0.0135031	0.0173052	0.0155179	0.0143384	0.0330322	0.0241381	0.00933574	0.0268007	0.0389464	0.0217287	0.0363995	0.0413281	0.0236843	0.0347397	0.0572166	0.0178038	0.0625031	0.01921	0.0303007	0.011489	0.0163246	0.0295417	0.0499474	0.0449248	0.0360515	0.0200095	0.0192895	0.033243	0.029229	0.0397534
ENSG00000131584	0.00637526	0.00984944	0.00186956	0.00253143	0.00181307	0.0038931	0.00576849	0.00484927	0.00639023	0.013508	0.0251465	0.00698161	0.00328453	0.00388173	0.00519102	0.0037023	0.00528989	0.00691835	0.00416562	0.00392558	0.00422524	0.00424496	0.00363308	0.00566579	0.0052083	0.00715894	0.0108306	0.0141489	0.00371075	0.00830811	0.00287603	0.0088398	0.00693209	0.00590076	0.00997013	0.0135353	0.00320983	0.00264689	0.00135146	0.00380979	0.00459009	0.00487976	0.00631065	0.00592539	0.00367553	0.00299897	0.00345826	0.00571517	0.00443544
ENSG00000169972	0.0315016	0.0214138	0.00913604	0.0381483	0.0103173	0.00680768	0.0207134	0.0118397	0.0165291	0.0103504	0.00564161	0.0222675	0.0216591	0.00798993	0.00830688	0.00662072	0.00807014	0.0279	0.0132438	0.0651759	0.00998309	0.0118181	0.0172977	0.00625341	0.00150283	0.00540716	0.0139779	0.0460407	0.0229095	0.0186679	0.0322997	0.00941267	0.0130259	0.0126911	0.0136403	0.00662237	2.54197e-05	0.0353204	0.00778771	0.0439915	0.0267696	0.00551379	0.0133803	0.0119179	0.0223148	0.0398414	0.0150018	0.0101828	0.0113885
ENSG00000127054	0.0109676	0.0183113	0.0201553	0.00803278	0.0141727	0.0119537	0.00718339	0.0203334	0.0159134	0.00923269	0.00638485	0.0110398	0.00830459	0.0100631	0.0124017	0.0131109	0.00998166	0.0167461	0.00797388	0.00949641	0.00821155	0.00862958	0.0102739	0.0116153	0.0158943	0.00912063	0.00917099	0.0143912	0.00902142	0.0109607	0.00765198	0.0121738	0.00886725	0.00968559	0.0114185	0.0215917	0.0109717	0.0131795	0.0075475	0.00931014	0.00864281	0.00741924	0.00969936	0.010262	0.0119721	0.00745315	0.00684807	0.0116892	0.0172536
ENSG00000240731	0.0283149	0.0567709	0.0419416	0.0231364	0.0144414	0.0233395	0.0244896	0.0553161	0.0527621	0.0195672	0.0276661	0.00613155	0.0187182	0.0326671	0.0136864	0.034675	0.0427592	0.0365103	0.0147673	0.0242419	0.0320738	2.54197e-05	0.0209447	0.0404507	0.0537393	0.0079833	0.0352942	0.0295067	0.0220651	0.0399997	0.038541	0.0274809	0.012381	0.0422357	0.0251816	0.171288	0.0219266	0.0175251	0.0250968	0.0205235	0.029581	0.0115049	0.0301226	0.0183395	0.00205998	2.54197e-05	0.0341246	0.0410235	0.0158293
ENSG00000224051	0.00596345	0.00676782	0.00464839	0.000247807	0.00474056	0.00302538	0.00553239	0.00636608	0.00504233	0.00215134	0.00882415	0.00679708	0.00401627	0.00433494	0.00690167	0.00507521	0.00570883	0.006098	0.00395305	0.00312364	0.00294213	0.00603091	0.00734491	0.00487516	0.00313156	0.00813528	0.00138845	0.00624631	0.0078747	0.00497026	0.003674	0.00471606	0.00467975	0.0096676	0.00810565	0.00720196	2.54197e-05	0.00529874	0.00105814	0.00566159	0.00915518	0.00225375	2.54197e-05	0.00414564	0.00884951	0.00716379	0.00310414	0.00348731	0.00380874
ENSG00000107404	0.00658973	0.00723902	0.0054457	0.00166042	0.00234313	0.0031712	0.00202959	0.00832353	0.00544959	0.00427086	0.00640334	0.00538545	0.00538312	0.00527498	0.003617	0.00349403	0.00345053	0.00436304	0.00347663	0.00257283	0.0024852	0.00240858	2.54197e-05	0.00646738	0.00402963	0.00318278	0.00527835	0.00492162	0.00449148	0.00444409	0.00410896	0.00623173	0.00380198	0.00422444	0.00559665	0.0050848	0.00211437	0.00429996	0.00500537	0.0014826	0.00222657	0.00386921	0.0061456	0.00566237	0.00250593	0.00579406	0.00851152	0.00644356	0.00316566
ENSG00000162576	0.0020125	0.00702892	0.00764597	0.0220336	0.021681	0.0374645	0.00449452	0.00878859	0.00704755	0.00891036	0.0758621	0.00847957	0.00420679	0.00521886	0.0050732	0.00866044	0.00177799	0.00365226	0.00987233	0.00904734	0.0247379	0.00791904	0.00951148	0.0047508	0.00814912	0.00439305	0.00680292	0.0301758	0.00553871	0.00611734	0.00470547	0.00802931	0.00697809	0.0284039	0.0168716	0.00560927	0.0241714	0.0106729	0.0283111	0.00654628	0.0101006	0.042507	0.00367941	0.00239025	0.00840492	0.00416301	0.00475978	0.00803533	0.00373549
ENSG00000175756	0.0743758	0.0607307	0.073892	0.13576	0.0547635	0.0763735	0.129128	0.0955234	0.0706563	0.103756	0.0290591	0.0513756	0.103065	0.0509973	0.0540297	0.0715506	0.05207	0.0559214	0.0650303	0.122127	0.156229	0.169321	0.198232	0.044942	0.0878307	0.0530908	0.0942783	0.0797241	0.102888	0.0839449	0.102639	0.0289916	0.05087	0.0119158	0.0780365	0.0733856	0.105207	0.0734773	0.103109	0.122093	0.133998	0.0397375	0.0627789	0.0323455	0.0392638	0.0645423	0.051426	0.027095	0.0774027
ENSG00000221978	0.00412933	0.0034637	2.54197e-05	0.000603372	0.00435599	0.00239935	0.00431337	0.0024256	0.0018608	0.00419299	0.000777882	0.00766034	0.00234163	0.000945206	0.00348344	0.00344682	0.00115188	0.00422437	0.00229741	0.0054861	0.00438712	0.0106055	0.00964159	0.00206596	0.00163451	0.0012955	0.0024579	0.00292223	0.00294271	0.00486997	0.00434576	0.00262035	0.00231275	0.00534358	0.00348853	0.00380965	0.00409975	0.00273011	0.00839768	0.00296259	0.0053037	0.00208112	2.54197e-05	0.00271445	0.00119782	0.0029969	0.00247148	0.00367625	0.00258315
ENSG00000224870	0.0120627	0.0146526	0.00673047	0.00748341	0.00810898	0.0145381	2.54197e-05	0.00994693	0.00724882	0.00836928	0.00907057	0.0108753	0.0050553	0.0053148	0.00257284	0.00538059	0.00950895	0.0151447	0.00609082	0.00686209	0.00469658	0.00517255	0.00723405	0.00448308	0.00767149	0.00419875	0.0234188	0.0252113	0.00315348	0.0162122	0.0158141	0.00781503	0.00539292	0.0154102	0.00543238	0.00878517	0.00454983	0.00366216	0.015149	0.00392926	0.00446003	0.00872804	0.00435386	0.0145266	0.00138634	0.00263292	0.000862601	0.0106068	0.00211551
ENSG00000242485	0.00270385	0.00239142	0.00295038	0.00380969	0.00439544	0.00560364	0.00428023	0.00226193	0.00298479	0.00195851	0.00445524	0.00345927	0.00361309	0.00193521	0.00395965	0.00125642	0.0026723	0.00135974	0.00478172	0.00458704	0.00211073	0.00369148	0.00674235	0.00137188	0.00343108	0.00122493	0.00205727	0.00253604	0.00427196	0.00448761	0.00358806	0.00325571	0.00236575	0.0108164	0.00179144	0.00262745	0.00168985	0.00408433	0.00434958	0.00141514	0.00465726	0.00382414	0.00269688	0.00174365	0.00608939	0.00275987	0.00153262	0.00244858	0.00503542
ENSG00000235098	0.893867	1.12376	0.0567608	0.226613	0.893867	0.164184	0.19227	0.522384	0.68878	0.628057	0.989449	0.454822	0.727252	0.306429	0.041935	0.245198	0.893867	0.768575	0.28739	0.297008	0.679332	0.211839	0.149875	0.423678	0.763842	1.29377	1.19057	0.723616	0.2385	0.106327	0.893867	0.620522	0.200917	1.57249	0.895504	1.09699	0.476041	0.893867	0.625939	0.491278	0.0753116	0.0592437	0.362759	0.0822441	0.756591	0.469986	0.136986	0.642437	0.893867
ENSG00000225285	0.0356311	0.032695	0.0122859	0.0133568	0.0211681	0.0140055	0.0132114	0.0101848	0.0121608	0.0400117	0.0364252	0.00413239	0.0225219	0.0255043	0.0118316	0.0186399	0.019241	0.031521	0.0122298	0.0136117	0.0153444	0.0138628	0.0301064	0.0179987	0.00596124	0.0670861	0.0456932	0.0432373	0.0115337	0.00442211	0.0217897	0.0270917	0.0247227	0.162317	0.0268694	0.0646385	0.014481	0.0213144	0.0150803	0.0150723	0.0290383	0.0227412	0.0159463	0.0136525	0.0176612	2.54197e-05	0.00372036	0.00657637	0.0220964
ENSG00000179403	0.00561565	0.0199626	2.54197e-05	0.00615456	0.0201913	0.00387967	0.00134544	0.00251802	0.00180574	0.00315024	0.104735	0.00676856	0.00397455	0.000915776	0.00232908	0.00416422	0.00635546	0.00557904	0.00367696	0.00581067	0.00539647	0.00429453	0.00667645	0.00336558	0.002588	0.0261479	0.00260177	0.00544839	0.00198477	0.00377917	0.00413263	0.00588385	0.00215083	0.0184204	0.0053457	0.00883206	0.00492822	0.0117375	0.00692558	0.00558664	0.00588909	0.00518114	0.00112817	0.00274118	0.000792683	0.00841075	0.00221745	0.00367495	0.00518576
ENSG00000215915	0.505977	0.47774	0.00479521	0.0966764	0.443417	0.415833	0.350818	0.315532	0.274919	0.33319	0.386939	0.165745	0.24517	0.227492	0.104958	0.261485	0.146128	0.492579	0.245514	0.282071	0.448438	0.411691	0.75873	0.221069	0.173968	0.476807	0.397245	0.394189	0.437176	0.23341	0.179451	0.338836	0.210123	0.506498	0.360425	0.639327	0.314974	0.416727	0.645965	0.293109	0.558507	0.190355	0.110983	0.131374	0.149734	0.244942	0.216591	0.251747	0.211443
ENSG00000160072	0.0337374	0.0270828	0.00342603	0.0308495	0.0479373	0.0429695	0.0213843	0.0318409	0.0238813	0.0320923	0.0324272	0.0224801	0.0326324	0.0148256	0.013106	0.0276603	0.0505499	0.0202869	0.0446615	0.0324823	0.0463807	0.0138574	0.0242862	0.0286338	0.0262401	0.0415462	0.0370508	0.0274172	0.0318617	0.0265095	0.0348596	0.0270391	0.0376689	0.0484029	0.0156621	0.0292947	0.0188944	0.065564	0.0255915	0.0393553	0.0574529	0.0260509	0.027403	0.0334603	0.0576212	0.046819	0.0195151	0.0224777	0.0478604
ENSG00000197785	0.134738	0.141794	0.159771	0.172297	0.132838	0.142745	0.131559	0.125723	0.144938	0.151561	0.13529	0.130025	0.137965	0.134366	0.155281	0.146959	0.151742	0.164266	0.148184	0.133983	0.152571	0.135971	0.110578	0.143649	0.133993	0.156615	0.180166	0.17509	0.13459	0.147765	0.140397	0.128962	0.120773	0.123295	0.144028	0.137437	0.157501	0.115194	0.147222	0.148954	0.155418	0.135988	0.148461	0.148051	0.131273	0.116479	0.118728	0.141532	0.139109
ENSG00000205090	0.0440912	0.0235133	0.0111625	0.0157018	0.00409208	0.029057	2.54197e-05	0.00251571	0.00785382	0.0286498	0.0727299	0.042125	0.0379378	0.0223688	0.0241051	2.54197e-05	0.0322214	0.0316947	0.0326194	0.00504465	0.00607266	0.00343454	0.0163698	0.00752595	0.0162049	0.0231424	0.0343813	0.0391471	0.0213022	0.013737	0.0389125	0.0266102	0.0387201	0.0524536	0.0259015	0.0291094	0.00385805	0.00190885	0.00864721	0.00631613	0.0144682	0.0242876	0.0311643	0.0316136	0.0120376	0.0116148	0.025228	0.034314	2.54197e-05
ENSG00000160075	0.000856155	0.000975394	6.92433e-05	0.0025684	0.000994931	0.00269936	0.0010714	0.000622677	0.000423765	0.000668026	0.00180755	0.00255099	0.00128336	0.00177766	0.00426901	0.000484516	0.000596437	0.00151426	0.000881543	0.00107563	0.000641816	7.55797e-05	0.000774568	0.000513057	0.000889036	0.00103964	0.000679832	0.00366179	0.00155805	0.00126662	0.00113085	0.00108034	0.000855577	0.00178494	0.0021138	0.00159068	0.000694652	0.000775328	0.000537224	0.000304208	0.0016304	0.000893496	0.00121806	0.00171595	0.000523242	0.00173478	0.00104239	0.0016003	0.000357466
ENSG00000272106	0.0217387	0.0155012	0.00160916	0.0309551	0.0139759	0.0292475	0.0217431	0.0169993	0.0118747	0.0350969	0.00733058	0.0422179	0.00673685	0.00703369	0.0159511	0.0187218	0.0261076	0.0141208	0.0254534	0.0193525	0.0208557	0.0206965	0.0261381	0.0170354	0.020629	0.0175485	0.0381416	0.0246351	0.0149997	0.0136645	0.0123503	0.00935002	0.0144276	0.0453756	0.0126703	0.0130756	0.0265361	0.0118534	0.0166176	0.0159055	0.0271889	0.00926798	0.0198618	0.00756643	0.0136946	0.014533	0.011031	0.0191954	0.0127087
ENSG00000197530	0.00308199	0.00404043	0.0015941	0.000591627	0.00217424	0.00415436	0.00197634	0.0026571	0.00210583	0.00245071	0.00674829	0.00297993	0.00176528	0.00614947	0.00137004	0.00212998	0.00276455	0.00466646	0.00285324	0.00318137	0.000804983	0.0041387	0.00387513	0.00238604	0.00301642	0.00172886	0.00232158	0.00200146	0.00330537	0.00283966	0.00264485	0.00681853	0.00154045	0.0130113	0.00254143	0.00448896	0.0010176	0.00260232	2.54197e-05	0.00136264	0.00314531	0.00220763	0.000630179	0.00262387	0.00300072	0.00272389	0.00259063	0.00312885	0.0056226
ENSG00000248333	0.0888291	0.0858335	0.0848988	0.241547	0.0635066	0.0538148	0.0559494	0.0877525	0.0793313	0.0519251	0.0729559	0.0897181	0.0898549	0.108642	0.0743441	0.0646343	0.078782	0.0950635	0.0870712	0.109014	0.0714231	0.106725	0.0249546	0.0780535	0.0829497	0.150549	0.0832543	0.0708323	0.0649335	0.10241	0.0862021	0.061863	0.0694015	0.089423	0.106217	0.0985653	0.135036	0.0638984	0.0991931	0.0618478	0.0924626	0.0905353	0.109754	0.0940375	0.103623	0.0779479	0.157489	0.0772333	0.0477793
ENSG00000189339	0.0996766	0.122438	0.122654	0.0806289	0.11599	0.107323	0.0845604	0.125593	0.136511	0.0872203	0.127331	0.105788	0.0987912	0.109932	0.0851752	0.11505	0.136057	0.112975	0.11808	0.0885286	0.10693	0.0854502	0.125792	0.104912	0.138596	0.139885	0.10019	0.180793	0.103303	0.0948715	0.0927559	0.107339	0.101204	0.126388	0.12559	0.107678	0.086921	0.101094	0.0991512	0.0760885	0.0880578	0.125192	0.149038	0.112452	0.119906	0.0988816	0.0697896	0.114928	0.10431
ENSG00000269737	0.131279	0.134922	0.116083	0.160914	0.0625003	0.15302	0.16128	0.118335	0.110782	0.181909	0.042301	0.166792	0.147866	0.0877149	0.0705136	0.0526534	0.17508	0.162474	0.140628	0.140314	0.13169	0.136623	0.203799	0.0996061	0.133088	0.1523	0.197213	0.197866	0.0887285	0.0938161	0.157652	0.142491	0.1222	0.23078	0.153659	0.166101	0.151367	0.0587855	0.146279	0.140181	0.157179	0.156696	0.182908	0.146564	0.0674919	0.115065	0.0962535	0.155726	0.0974947
ENSG00000008128	0.0906195	0.100674	0.0580415	0.116731	0.0895512	0.102422	0.134495	0.122911	0.119925	0.0884722	0.12589	0.0635747	0.0899924	0.0735993	0.104315	0.0732454	0.0943136	0.0801234	0.0767526	0.109369	0.104306	0.112518	0.109112	0.0853909	0.110596	0.152516	0.0863165	0.0501367	0.0993517	0.0785385	0.0903154	0.0654082	0.0794938	0.107519	0.0809945	0.110037	0.170358	0.0779691	0.122229	0.120149	0.102624	0.0878676	0.0694122	0.058402	0.0847491	0.0677384	0.0806446	0.0714186	0.0867448
ENSG00000227775	0.109986	0.134161	0.100305	0.0447668	0.0718624	0.0561131	0.0735626	0.0941764	0.12198	0.10572	0.121146	0.084318	0.107021	0.101473	0.0862452	0.061658	0.172664	0.139753	0.111711	0.0639285	0.0614022	0.0746735	0.0590519	0.0929311	0.113326	0.168086	0.0926074	0.181628	0.108185	0.0897839	0.0832177	0.109577	0.0793882	0.259214	0.0963206	0.116948	0.0471275	0.0706621	0.0549514	0.0717773	0.0995202	0.136933	0.0761322	0.148776	0.0914075	0.122971	0.0745465	0.093911	0.0820133
ENSG00000215790	0.106161	0.13011	0.103152	0.0423809	0.0674922	0.0532143	0.071872	0.0918501	0.118213	0.0997185	0.126488	0.082481	0.102663	0.0965147	0.0819557	0.058316	0.167455	0.135694	0.105929	0.062155	0.0588397	0.0723611	0.0563355	0.0920567	0.108279	0.157299	0.0879396	0.178628	0.104087	0.0854104	0.0761915	0.106627	0.0769361	0.255925	0.092725	0.113441	0.0453321	0.0684659	0.0536758	0.0699211	0.0952364	0.128677	0.0703661	0.138263	0.0869626	0.117178	0.067521	0.0893443	0.079361
ENSG00000008130	0.00737032	0.00760589	0.00349923	0.00759222	0.0072498	0.00679484	0.00512113	0.00438945	0.00669718	0.00663412	0.00410726	0.00380991	0.00303011	0.00365886	0.00248028	0.00505636	0.00471251	0.00716738	0.00614832	0.00587083	0.00464951	0.00720627	0.00765102	0.0048623	0.00610217	0.00249464	0.0057534	0.00299156	0.00854932	0.0042343	0.00387464	0.00280506	0.00376769	0.0034073	0.00247983	0.00804598	0.00594658	0.00558779	0.00698242	0.00878034	0.00309247	0.00330233	0.00451202	0.00455169	0.00918628	0.0038545	0.00235388	0.00343538	0.00803159
ENSG00000078369	0.0091119	0.00434896	0.00408046	0.00218515	0.000844393	0.00178698	0.00141538	0.00421225	0.00248363	0.00245129	0.00275716	0.00508889	0.00324397	0.00326884	0.00173293	0.00209086	0.00629598	0.00376837	0.00353978	0.0016613	0.000497937	0.000641478	0.00816893	0.00278875	0.00227016	0.00101563	0.00498165	0.000509966	0.00806412	0.00296938	0.00413037	0.00161262	0.00253154	0.00204661	0.00234228	0.00383074	0.000426033	0.00115446	0.000506161	0.00177042	0.00335031	0.00215744	0.000679878	0.00323577	0.000252328	0.00430634	0.00588663	0.00413134	0.00339805
ENSG00000169885	0.091734	0.107425	0.0896919	0.040978	0.0021883	0.0414947	0.0306057	0.107738	0.121959	0.186847	0.181752	0.0834168	0.0339352	0.098234	0.0135455	0.016055	0.0980364	0.108484	0.110101	0.0302276	0.0148373	0.0405796	0.0665016	0.101663	0.11847	0.0956616	0.217208	0.0318375	0.0986136	0.028024	0.0543364	0.0848125	0.12969	0.148848	0.0997549	0.114513	0.0217369	0.0223411	0.0208235	0.0216706	0.0648205	0.0506306	0.0934677	0.095636	0.0806376	0.0627452	0.0740859	0.087716	0.0780014
ENSG00000178821	0.0356783	0.0711954	0.0614766	0.0305923	0.0268774	0.0322682	0.032061	0.0356099	0.0444416	0.0516704	0.21445	0.00284155	0.14232	0.0304039	0.00459934	0.160857	0.0577237	0.0462473	0.0545199	0.030039	0.00274834	0.0287679	0.0322299	0.0148388	0.044636	0.0379938	0.0832737	0.0714228	0.0869757	0.0915152	0.120882	0.217412	0.0675485	0.183196	0.0034145	0.0793155	0.00585938	0.0487878	0.0274462	0.0301443	0.0362664	0.112805	0.0498229	0.0338692	0.00445906	0.047255	0.0393839	0.00467153	0.0352845
ENSG00000162585	0.0142832	0.0128913	0.0203289	0.0188417	0.0101584	0.0235907	0.0154474	0.0186973	0.0168766	0.0238887	0.0279574	0.0123487	0.0211761	0.00868993	0.0458687	0.004238	0.0195059	0.0196127	0.0171894	0.0128174	0.0109947	0.0152298	0.0208432	0.01261	0.0138478	0.0174388	0.0342027	0.0189947	0.0188964	0.0203176	0.0185829	0.0189667	0.0161078	0.0347847	0.0304153	0.0169183	0.0217908	0.00463496	0.0149449	0.0144845	0.0240692	0.0203105	0.0160771	0.0162177	0.009357	0.0161311	0.0141044	0.01846	0.0116053
ENSG00000234396	0.0321413	0.0274718	0.0349402	0.0505853	0.0384675	0.131382	0.0440588	0.0379342	0.0391899	0.0464422	0.254264	0.0451648	0.0312738	0.0404035	0.0316121	0.0284163	0.0345272	0.0310435	0.031642	0.0397123	0.039394	0.0386095	0.109772	0.0419147	0.036829	0.0419447	0.146037	0.0142912	0.0276648	0.0250231	0.0331913	0.0307384	0.0265742	0.161695	0.0387229	0.0303473	0.0427252	0.03926	0.040845	0.0413926	0.115702	0.0395242	0.0314984	0.0341665	0.0291352	0.0241115	0.0361967	0.0337787	0.0274826
ENSG00000157933	0.00316319	0.00321642	2.54197e-05	0.00308228	0.00663039	0.00273217	0.00321495	0.00786665	0.00461932	0.00526755	0.00774488	0.0145212	0.00583355	0.0153222	0.00403919	0.00664812	0.00583014	0.00260727	0.00467497	0.00281334	0.00311153	0.00377946	0.00364127	0.00562588	0.00963349	0.00860594	0.00486228	0.00559908	0.00527985	0.00880325	0.00339819	0.0118586	0.00651646	0.00902265	0.00451305	0.00215261	0.00116606	0.0120058	0.00244813	0.00196591	0.000372648	0.0108048	0.0113688	0.0063824	0.0119762	0.00401169	0.00697697	0.00734768	0.00634362
ENSG00000116151	0.0108592	0.0141888	0.00277239	0.0179118	0.00803438	0.0156954	0.0126124	0.0159777	0.0104828	0.00888419	0.0917125	0.00621067	0.00865938	0.00688157	0.00704605	0.00762759	0.00976393	0.0118555	0.009186	0.00590779	0.00935639	0.0080822	0.0191324	0.0119346	0.0106257	0.0123304	0.0191911	0.00752708	0.00726805	0.0102009	0.0103886	0.0162961	0.00576225	0.0453706	0.00930246	0.0119722	0.0134264	0.00782805	0.0117463	0.0145982	0.00885542	0.015354	0.010749	0.0071244	0.00524769	0.00907519	0.00587473	0.00790003	0.00495212
ENSG00000269896	0.0330449	0.0320161	0.0058702	0.0423274	0.0176232	0.0177488	0.00331185	0.0268191	0.0252736	0.0278362	0.294011	0.0393137	0.0552443	0.0217363	0.0165682	0.031865	0.0289129	0.0133035	0.0200112	0.0181947	0.0268955	0.0196732	0.0299091	0.038564	0.034701	0.103774	0.0253083	0.0239697	0.0243116	0.0278289	0.0385915	0.0383549	0.0142884	0.0474642	0.063534	0.0472879	0.0204005	0.0193327	0.0227346	0.0289756	0.0405205	0.0899837	0.0247525	0.0309589	0.015916	0.0268288	0.0467548	0.0283173	0.0212329
ENSG00000157916	0.0046557	0.00631505	2.54197e-05	0.019254	0.00252118	0.0175534	0.00399314	0.00457175	0.00444013	0.0047021	0.00343029	0.00240521	0.00435194	0.00220242	0.00656518	0.00536422	0.00356265	0.00762923	0.00417302	0.00606104	0.00664147	0.00902955	0.00602744	0.00496515	0.00466835	0.00356343	0.00621029	0.00713341	0.0054011	0.00527477	0.00345134	0.00278541	0.00358246	0.00918008	0.00518269	0.00727742	0.00942943	0.00262394	0.00576603	0.00205864	0.00428574	0.00551557	0.00676079	0.00527115	0.00172272	0.00444871	0.00289047	0.00291346	0.00120492
ENSG00000157911	0.00337801	0.0057856	2.54197e-05	0.00481299	0.00244183	0.0080461	0.00153762	0.00269495	0.006787	0.00139705	0.00195739	0.00261925	0.00188824	0.00223444	0.000990223	0.0037515	0.00376095	0.0074676	0.0035143	0.00316779	0.0015338	0.00438323	0.00577136	0.00304672	0.00399163	0.00197028	0.00667343	0.00856284	0.00279936	0.00984944	0.00371201	0.00415273	0.00272966	0.0275559	0.000911475	0.00491552	0.00144976	0.0112896	0.00498125	0.00141239	0.00825335	0.000823059	0.00234974	0.008112	0.0015696	0.00193205	0.00166512	0.00161985	2.54197e-05
ENSG00000149527	0.048912	0.0421057	0.00705434	0.0359894	0.0178309	0.0465319	0.0222976	0.0459852	0.0486507	0.0537392	0.111864	0.0118486	0.00479915	0.0554497	0.0191166	0.00663134	0.0418797	0.0438373	0.00897165	0.00783311	0.00739489	0.0094227	0.021271	0.0618475	0.048688	0.0572572	0.097489	0.0181588	0.0854328	0.0087508	0.00395804	0.0596885	0.137516	0.0448453	0.0191602	0.0559331	0.0121017	0.0237055	0.00931109	0.0114577	0.018756	0.00754272	0.00411094	0.0426688	0.0908588	0.00988531	0.0279863	0.0859106	0.0732248
ENSG00000157881	0.00560656	0.000535482	0.0074426	0.00577386	0.00505671	0.0024511	0.0014625	0.00357784	0.00456612	0.00217436	0.00239421	0.00358537	0.0066017	0.00301056	2.54197e-05	0.00260795	0.00594411	0.00371156	0.00548373	0.00736209	0.00286014	0.00735991	0.00725202	0.00411814	0.00280751	0.000744854	0.00263471	0.00750658	0.00593121	0.00575497	0.00335384	0.00337063	0.00335926	0.0107765	0.00137448	0.00544669	0.000388467	0.0029734	0.00558372	0.0048767	0.00928313	0.00577049	0.00630506	0.00364516	0.00726268	0.004911	0.00231173	0.00385186	0.000968306
ENSG00000238164	0.00192906	0.00578785	2.54197e-05	0.0204178	0.0191873	0.00505201	0.0107376	0.00381027	0.00199549	0.00225458	0.00147867	0.0128879	0.00217525	0.00459866	0.00355505	0.00199116	0.00216309	0.00286446	0.00134804	2.54197e-05	0.00461859	0.00915194	0.00433356	0.00564723	0.00195074	0.00350929	0.0017455	0.00334986	0.00208437	0.0049331	0.0028971	0.00191698	0.0112221	0.00212303	0.0110763	0.00360136	0.000893247	0.0286777	0.0059048	0.00558419	0.00241788	0.00178941	0.00195201	0.00239553	0.0023618	0.00476628	0.00248959	0.0025516	0.00294526
ENSG00000157873	0.00170952	0.00372071	2.54197e-05	0.00490231	0.0473348	0.00373742	0.00518786	0.00613485	0.00297461	0.0031963	0.00636634	0.0140785	0.00235196	0.00158421	0.00264657	0.00288121	0.00135963	0.00183334	0.00190983	2.54197e-05	0.00253908	0.00224781	0.00573575	0.00304717	0.00309327	0.00386298	0.0021616	0.00191753	0.00208919	0.00354878	0.00211425	0.00135172	0.00986424	0.00149781	0.00834909	0.00373218	0.0034699	0.0325374	0.00501982	0.00301267	0.00217114	0.00249595	0.00170091	0.00197167	0.00167759	0.00585629	0.00238832	0.00341131	0.00321418
ENSG00000157870	0.00595858	0.0189723	2.54197e-05	0.00730572	0.00174985	0.00622273	0.0150983	0.00416443	0.00608934	0.012528	0.00696374	0.00158852	0.00539576	0.00102589	0.00303145	0.00224042	0.00966933	0.00932876	0.00593919	0.012062	0.00222988	0.00455897	0.000286823	0.00277095	0.00282497	0.00326043	0.0112031	0.00791018	0.00359933	0.00720201	0.00925158	0.00549799	0.00285928	0.0393061	0.00400035	0.016547	0.00182891	0.0025778	0.00514513	0.0168662	0.0119357	0.0027041	0.00277701	0.00887613	0.0087592	0.00085552	0.00347703	0.00271156	0.000292531
ENSG00000177133	0.0124626	0.00714442	0.0096026	0.00480419	0.0165815	0.00657634	0.00647072	0.00697366	0.0121405	0.0159099	0.128634	0.013633	0.0272989	0.0220079	0.010661	0.0207778	0.016013	0.00527984	0.0150218	0.00641358	0.00547084	0.0119944	0.0146879	0.0160524	0.0093372	0.0320053	0.00695603	0.0265891	0.00599838	0.0325266	0.0328069	0.0372786	0.0145385	0.0554811	0.0237077	0.00650709	0.00661864	0.01645	0.00607912	0.00703878	0.0231258	0.0426945	0.00992886	0.0233223	0.0160366	0.0105235	0.0274692	0.00685449	0.014368
ENSG00000142611	0.012297	0.00316227	0.0100922	0.00427234	0.00693061	0.00887965	0.00249938	0.0100813	0.00723544	0.00661056	0.0705131	0.00490031	0.0179915	0.00261614	0.0150087	0.00482986	0.0141169	0.00356052	0.0082765	0.00177303	0.00503664	0.0109469	0.0124048	0.0144545	0.0100451	0.010188	0.00395487	0.0165688	0.0036293	0.0150372	0.0183765	0.0415258	0.00388988	0.0508091	0.0128608	0.00626311	0.00513754	0.00679824	0.00558601	0.00260079	0.073978	0.00737674	0.00690793	0.00774383	0.020952	0.00307661	2.54197e-05	0.00409336	0.00540749
ENSG00000130762	0.0470549	0.0415277	0.0221753	0.0569967	0.0923847	0.0485362	0.0394621	0.0385452	0.026988	0.016245	0.179935	0.00656509	0.0613072	0.0122171	0.105054	0.0299655	0.0441116	0.0809895	0.0170203	0.0677781	0.0591606	0.0523785	0.0109687	0.00922831	0.0366529	0.099233	0.0452797	0.012681	0.0304029	0.0119545	0.0507193	0.0309467	0.011037	0.0928144	0.0697449	0.132737	0.0717679	0.122267	0.0488123	0.0368065	0.0351677	0.0328932	0.0203021	0.0115716	0.893711	0.0176775	0.0225052	0.0073588	0.0572682
ENSG00000162591	0.0181314	0.00571886	0.11428	0.028864	0.0399858	0.0177192	0.0150178	0.0152279	0.0211357	0.0301247	0.0710996	0.0225833	0.00959126	0.00862252	0.0218082	0.0126067	0.0406829	0.0161218	0.0251044	0.0345672	0.0142999	0.0328833	0.0233147	0.0149639	0.0237756	0.0414947	0.0252356	0.0179061	0.0250384	0.00708079	0.010491	0.0198987	0.0202614	0.0219004	0.0151012	0.0191384	0.0252706	0.0185856	0.00895881	0.0289517	0.0454357	0.0114061	0.0238684	0.0122418	0.0516291	0.0164633	0.00451679	0.0197252	0.0605381
ENSG00000158109	0.00607505	0.00645357	0.00147215	0.0120453	0.0146531	0.016481	0.00993565	0.00607787	0.00674221	0.00698505	0.0217378	0.00694752	0.0038999	0.00474228	0.00668798	0.00566578	0.0070691	0.00622366	0.00643707	0.0127978	0.0121897	0.0150818	0.0226046	0.0063347	0.00714026	0.0114958	0.00800736	0.00583089	0.00592454	0.00382453	0.0071315	0.00524639	0.007198	0.00806792	0.00713196	0.00768376	0.0169648	0.0144737	0.0130751	0.0177343	0.0200875	0.00720333	0.0059971	0.00708919	0.00577435	0.00728599	0.00290724	0.00723975	0.00326599
ENSG00000116213	0.0111978	0.00993085	2.54197e-05	0.00456868	2.54197e-05	0.0095749	0.0132443	0.00822229	0.0049757	0.00622297	0.0199451	0.00881434	0.0085713	0.0083667	0.00280928	0.00477077	0.00999851	0.00678944	0.00714761	0.00536923	0.00794577	0.00634096	0.00116284	0.00494495	0.00778264	0.00739608	0.00359182	0.0104167	0.0128929	0.0125187	0.012908	0.00657993	0.0115084	0.0125139	0.00376064	0.00761117	0.00583062	0.00459263	0.00282735	0.00432968	0.0144678	0.00829263	0.00993344	0.0116226	0.00933282	0.0027368	0.00663847	0.00786625	0.00746302
ENSG00000227372	0.00652823	0.00482061	0.00377129	0.00646153	0.00896938	0.0065928	0.0139388	0.00220507	0.00486986	0.0080383	0.0299705	0.0100234	0.0109631	0.00600056	0.0052288	0.00394762	0.00681771	0.00644148	0.0078878	0.00520635	0.00259051	0.00920708	0.0192129	0.00749652	0.00492192	0.00563353	0.00538426	0.0179007	0.00625573	0.00694919	0.0121947	0.00758807	0.00569512	0.0226534	0.0128044	0.00633753	0.0109353	0.00725343	0.00515131	0.0052252	0.0102524	0.00561723	0.00723224	0.0084839	0.00251944	0.00441887	0.00623994	0.00868184	0.00888812
ENSG00000130764	0.00347351	0.0033971	0.00518641	0.00192497	0.00183392	0.00289445	0.00255755	0.00227901	0.00279059	0.00380502	0.00258314	0.00309161	0.00256194	0.00283029	0.00523	0.00282138	0.00281663	0.00293569	0.00223753	0.00293134	0.00271948	0.00282362	0.0023355	0.00221895	0.00252492	0.00245906	0.00363349	0.00182636	0.0045452	0.00314256	0.00291377	0.00340231	0.00354932	0.0125182	0.00233257	0.00207215	0.0016657	0.00124197	0.0039116	0.00299479	0.00366409	0.00327095	0.00219789	0.00327226	0.00325552	0.00370522	0.00328015	0.00271839	0.00432759
ENSG00000272153	0.00392231	0.0058245	0.0020777	0.0037314	0.00106651	0.0028505	0.00016213	0.00294967	0.00386826	0.00661609	0.00190528	0.00435247	0.00215205	0.00206702	0.0132307	0.00165491	0.00470311	0.000781287	0.00269723	0.00412585	0.00343197	0.0152865	0.00602093	2.54197e-05	0.001087	0.0011591	0.00168987	0.00080111	0.00253211	0.00860367	0.00492923	0.00116964	0.00520074	0.0105703	0.00296973	2.54197e-05	0.00313664	0.00134976	0.00390551	2.54197e-05	0.00726256	0.000527486	0.0183774	0.00267137	0.000136351	0.00208157	0.00220734	2.54197e-05	0.00147973
ENSG00000116198	0.016732	0.0134408	0.0179912	0.00454214	0.0118811	0.00785102	0.00357301	0.0149715	0.0108706	0.0171053	0.0214961	0.0321329	0.0243667	0.0163755	0.00469641	0.027497	0.0150293	0.0130438	0.0191773	0.00578234	0.00853344	0.00667551	0.00816832	0.0159525	0.0123218	0.0102775	0.00992579	0.0261869	0.021285	0.0201537	0.0235645	0.0186365	0.0242684	0.0300436	0.0462697	0.0112333	0.0072826	0.0118107	0.00866869	0.00555388	0.0124443	0.0164596	0.0204908	0.014018	0.0334991	0.0104428	0.0170593	0.0189498	0.0171082
ENSG00000169598	0.0158566	0.0313145	0.0258663	0.0324821	0.0326555	0.0222028	0.0189516	0.031918	0.0227011	0.0428437	0.00713176	0.0147942	0.0164497	0.0231846	0.0065708	0.028081	0.0120634	0.0232252	0.0159082	0.0336183	0.0252991	0.0415879	0.0359553	0.0132185	0.0258399	0.00623527	0.0302226	0.0425099	0.0188396	0.0140966	0.0193402	0.0144873	0.0231676	0.0141924	0.0140581	0.0286493	0.0304672	0.0339719	0.0223452	0.0266887	0.0260998	0.0112694	0.0163841	0.0139231	0.018665	0.0365123	0.0216298	0.0167616	0.0246125
ENSG00000198912	0.0379869	0.0208687	0.0317368	0.0465568	0.0357706	0.0481924	0.0446729	0.0279161	0.0233085	0.0385838	0.0128204	0.0338767	0.0337128	0.0287867	0.00809364	0.0539882	0.0271805	0.0296152	0.0378792	0.0376319	0.0237554	0.040023	0.0418432	0.028124	0.0311995	0.0100406	0.0369924	0.0459592	0.0443301	0.0446655	0.0319664	0.0477386	0.0465899	0.0230496	0.0272428	0.0317374	0.0174533	0.0447981	0.0173104	0.0407595	0.0529362	0.0240133	0.037517	0.0297687	0.0522824	0.0395022	0.0378391	0.0326435	0.0499766
ENSG00000196581	0.0351368	0.0787373	0.0638345	0.00781464	0.0119561	0.00794655	0.00824384	0.107582	0.109106	0.0771971	0.230754	0.250242	0.129916	0.0878565	0.00457327	0.0316502	0.0238927	0.0723945	0.0319404	0.00734783	0.00520692	0.00665755	0.0102348	0.0800129	0.0613916	0.103183	0.0829825	0.0507142	0.0414096	0.0224754	0.101901	0.0385779	0.0400705	0.461558	0.0759215	0.076206	0.0080434	0.00597575	0.00611039	0.00736997	0.0443611	0.0323566	0.0218076	0.0634543	0.10408	0.0274996	0.0578958	0.0373853	0.0307524
ENSG00000131697	0.0203451	0.0181911	0.0436883	0.0273225	0.00826315	0.02171	0.0125743	0.0200757	0.0208673	0.0130177	0.0135213	0.0152881	0.0553494	0.0206947	0.0097608	0.0131694	0.0184841	0.02023	0.0153192	0.0128346	0.0129558	0.0108889	0.0235024	0.0202747	0.0209844	0.0185458	0.00970392	0.497211	0.0144163	0.0228717	0.0316807	0.0158946	0.0165687	0.0305338	0.0157487	0.0181378	0.0117858	0.0144829	0.0175996	0.0124685	0.0173613	0.0169763	0.039179	0.0135934	0.0312259	0.0191547	0.00948064	0.0157565	0.00896401
ENSG00000069424	0.00862673	0.00970828	0.00462804	0.00664381	0.00694258	0.00684842	0.00883039	0.00625968	0.00714786	0.0174436	0.00623385	0.0143412	0.00972459	0.00627369	0.00919311	0.0116992	0.00853785	0.0103374	0.0084805	0.00871112	0.00694898	0.0102042	0.00743167	0.0102115	0.00787081	0.0164434	0.0405304	0.0538127	0.00731547	0.0107879	0.00957947	0.00831747	0.0105396	0.0105321	0.00779624	0.0125065	0.00678274	0.00674317	0.00690232	0.00804033	0.00814006	0.00880481	0.0111011	0.00772501	0.0102826	0.0120077	0.0128024	0.009297	0.0102365
ENSG00000116254	0.0664304	0.033779	0.0315353	0.00110383	0.00159775	0.00139122	0.00249879	0.00994024	0.0333436	0.0190762	0.0522909	0.046068	0.0449349	0.00779304	0.000532558	0.0289936	0.0858844	0.0546881	0.0836961	0.00217675	0.000974009	0.00169608	0.0018656	0.00877549	0.0264198	0.0824427	0.0774369	0.0609895	0.0773101	0.0195257	0.0893713	0.0526766	0.066511	0.0875808	0.0211273	0.0389341	0.000900696	0.0011299	0.00112396	0.000971037	0.00179455	0.0626007	0.0445291	0.0334006	0.042442	0.00328809	0.0434517	0.0716341	0.015128
ENSG00000116251	0.0113307	0.0108408	2.54197e-05	0.0101738	0.00208436	0.00315589	0.00380087	0.0240864	0.00750557	0.00681095	0.00346528	0.00617371	0.00331186	0.00780398	0.00132452	0.0107132	0.00477699	0.00330684	0.00656397	0.0024406	0.00264126	0.00736414	0.00123987	0.0210837	0.00576065	0.00177525	0.00620157	0.00949586	0.00653627	0.0138157	0.00748251	0.00422422	0.034091	0.0167329	0.00219367	0.00306768	0.00408287	0.000419884	0.00692414	0.00332708	0.00460886	0.00713271	0.0107746	0.00535864	0.00255424	0.00651607	0.013768	0.00742596	0.00456586
ENSG00000158286	0.050661	0.0552977	0.0166779	0.0156014	0.0112996	0.0100855	0.0207423	0.116873	0.0389315	0.0100688	0.0604528	0.016975	0.0497115	0.0488646	0.0191075	0.0387783	0.0516358	0.0394498	0.0361338	0.007325	0.0255106	0.00661485	0.0142033	0.0943757	0.0359568	0.0161742	0.0147333	0.0468687	0.0247958	0.0443002	0.0431621	0.0905993	0.181479	0.144478	0.0305439	0.060798	0.0162611	0.018183	0.0122863	0.0135907	0.00826852	0.0490953	0.0398766	0.0864209	0.0222033	0.0302671	0.0387268	0.0887144	0.0661595
ENSG00000116237	0.0318909	0.0270597	0.0313866	0.0429126	0.0113502	0.0347646	0.0308382	0.0257904	0.0154437	0.0227436	0.0114865	0.014773	0.0239692	0.0211782	0.0141946	0.0128598	0.0284298	0.0191464	0.0331229	0.0291886	0.018625	0.0232797	0.0204133	0.0291505	0.0181801	0.0115038	0.0111269	0.0167388	0.0315735	0.0161239	0.0245257	0.0204019	0.0247166	0.0433588	0.0105443	0.0232253	0.0275841	0.00798437	0.0261954	0.0276353	0.0394442	0.0246472	0.0340789	0.0223447	0.0173625	0.0165541	0.0228699	0.0211197	0.0195303
ENSG00000158292	0.00860177	0.0146247	0.0168248	0.00808761	0.0211923	0.0125083	0.0295873	0.0195155	0.0102523	0.0738705	0.0263265	0.0022274	0.00486983	0.0053555	0.0142547	0.00814183	0.00539788	0.00606273	0.0114972	0.0123293	0.0122	0.00609298	0.0201166	0.0155013	0.00791485	0.0146209	0.144044	0.00522862	0.0125851	0.0177181	0.0054562	0.194894	0.00578318	0.0438691	0.00661088	0.0242238	0.00554744	0.018883	0.0177361	0.0207039	0.02495	0.00948873	0.0266134	0.00321893	0.0104345	0.0070676	0.0070717	0.014917	0.00969427
ENSG00000097021	0.046394	0.0123231	0.0129049	0.00116069	0.0213697	2.54197e-05	0.0194496	0.00227995	0.0120335	0.0279996	0.0113059	2.54197e-05	0.0242106	0.0088305	0.00662786	0.0180266	0.013477	0.0190215	0.0268355	0.000159685	0.00141296	0.00275759	0.000650431	0.0166101	0.0102173	0.00426829	0.0183991	0.0086175	0.0148561	0.0267691	0.0262977	0.0185586	0.0597172	0.0818272	0.00767938	0.00942884	0.00648769	0.0167525	2.54197e-05	0.00272476	0.00418743	0.00418255	0.0211386	0.0147997	0.0177011	0.0331517	0.018964	0.00451407	0.00498603
ENSG00000215788	0.0133902	0.0126223	0.0149962	0.00547679	0.00495148	0.00354402	0.00322207	0.0276947	0.00546495	0.00368207	0.0962582	0.0149702	0.00683994	0.00425065	0.0144842	0.0148154	0.00940704	0.00410961	0.0163642	0.00914634	0.00867269	0.0104268	0.0171215	0.0197286	0.0107837	0.139697	0.0054988	0.013593	0.00775077	0.00470638	0.00586436	0.00775093	0.00879687	0.0150042	0.00590357	0.0189001	0.0127526	0.00527324	0.0101353	0.00504572	0.0178154	0.011375	0.00643887	0.0183277	0.014527	0.00417223	0.00987302	0.00306516	0.00696413
ENSG00000171680	0.00544932	0.0120059	0.00695026	0.00481759	0.00420572	0.00781639	0.0131021	0.00881014	0.00747974	0.00246538	0.0747886	0.0134452	0.00393752	0.00497184	0.00644476	0.00752879	0.00729299	0.00473751	0.00506984	0.00360646	0.00543855	0.00160526	0.0112518	0.00573321	0.00964366	0.127341	0.00507144	0.0178808	0.00626684	0.00731007	0.00384697	0.00816963	0.00488826	0.0204976	0.00512656	0.0139735	0.00259972	0.00471207	0.00454522	0.00262133	0.0152221	0.013	0.0152256	0.00805739	0.00639537	0.00217213	0.00866975	0.00792004	0.00558708
ENSG00000162408	0.00751463	0.00531593	2.54197e-05	0.00982764	0.0027551	0.00365829	0.00449709	0.00390292	0.0041675	0.00541462	0.00383789	0.00292858	0.0156324	0.00780645	3.63293e-05	0.00594655	0.00556818	0.00586953	0.0102989	0.000624546	0.00485374	0.000274419	0.00717583	0.000809969	0.00496726	0.00564528	0.00423611	0.0044178	0.00704629	0.0053422	0.0217673	0.00296479	0.00537076	0.0201826	0.00223263	0.00735397	2.54197e-05	0.00331178	0.00189011	0.0019248	0.0134134	0.00885827	0.00472901	0.00655264	0.00422128	0.00396105	0.00588593	0.00282776	0.00676735
ENSG00000204859	0.0177411	0.0196712	0.00501904	0.0313328	0.00680778	0.00815501	0.00154352	0.00243338	0.0140521	0.0160461	0.0258195	0.0134645	0.0116782	0.0061156	0.00773877	0.00794451	0.0123826	0.0194469	0.013306	0.0170423	0.0109088	0.0225438	0.0278601	0.00708969	0.00935341	0.00402574	0.0203538	0.0199716	0.00977089	0.0141396	0.0168554	0.0120464	0.0135755	0.0215589	0.010361	0.0137438	0.0295215	0.00537446	0.00787899	2.54197e-05	0.04726	0.0132265	0.00347057	0.0141607	0.0031517	0.00700896	0.012911	0.00338709	0.0157489
ENSG00000162413	0.00445487	0.00230439	0.00618707	0.00525675	0.00232651	0.00450369	0.00561798	0.00316441	0.00452086	0.00196322	0.00990751	0.00414841	0.0045961	0.00374602	0.00465439	0.00377381	0.00435324	0.00353511	0.00331653	0.0044184	0.00385199	0.00527783	0.00631924	0.00402452	0.00372465	0.00192368	0.00404667	0.00568631	0.00480747	0.00581721	0.00405453	0.00358947	0.00666369	0.00408725	0.00371024	0.00296574	0.00336054	0.00310123	0.00522206	0.010563	0.00328288	0.00461442	0.00661472	0.00347066	0.00316578	0.00376267	0.00331563	0.00479734	0.00408805
ENSG00000116273	0.00678409	0.00327995	0.0231586	0.00848927	0.00903116	0.0106121	0.0228816	0.00538939	0.00269886	0.00530138	0.00186497	0.00759797	0.00175522	0.00496471	0.000728329	0.00446684	0.00507938	0.0037091	0.00422151	0.00572961	0.00801142	0.0103412	0.0120089	0.00321126	0.00349812	0.000652858	0.00679542	0.00675177	0.00495311	0.00400885	0.00516549	0.00316701	0.00336583	0.0277426	0.00270433	0.00534695	0.00762517	0.00684298	0.0202663	0.0116656	0.0137931	0.00548527	0.00546811	0.00751519	0.00267563	0.00208812	0.000569698	0.00551201	0.00516536
ENSG00000041988	0.0163055	0.0131999	0.000885698	0.00456091	0.00384822	0.00483896	0.0131502	0.00621251	0.00597621	0.0156315	0.0050434	0.00384908	0.0106677	0.00567745	0.0123616	0.0051071	0.0118962	0.0124227	0.0124337	0.00449144	0.00223067	0.0102338	0.0142007	0.00946593	0.0110795	0.00401338	0.0158849	0.0168487	0.00847006	0.00578562	0.011772	0.0102147	0.00852882	0.0170837	0.0133443	0.0118754	0.00715939	0.002007	0.0102375	0.00715658	0.00885687	0.0167354	0.0108223	0.0128324	0.00123913	0.00853163	0.0203233	0.00650504	0.00532931
ENSG00000007923	0.00638635	0.00463272	0.00209363	0.00822074	2.54197e-05	0.00853336	0.0217919	0.00305045	0.00358579	0.00253203	0.00208281	0.00269912	0.0031773	0.00291554	0.00199196	0.00160226	0.00442627	0.00576868	0.00399943	0.00680735	0.00759228	0.00290017	0.0148609	0.00206516	0.00384835	0.00238407	0.00255375	0.00564063	0.00576458	0.00524314	0.00628554	0.00233236	0.00324971	0.0171968	0.00131281	0.00533324	0.000631875	0.00145801	0.00364702	0.00560621	0.00801051	0.00151265	0.00404099	0.00436643	0.00152985	0.00123242	0.00321006	0.000893215	0.00260999
ENSG00000171735	0.00719486	0.0109017	2.54197e-05	0.00651031	0.00777655	0.00579442	0.00485751	0.0138162	0.00436613	0.0265263	0.0166164	0.00908307	0.00910072	0.00991135	0.00437309	0.00913967	0.0125377	0.0135281	0.0104934	0.00590187	0.00654317	0.00536931	0.0101526	0.0119039	0.00776738	0.0386797	0.0134648	0.0423196	0.0102219	0.00944805	0.00940214	0.0157971	0.00558885	0.021362	0.00209901	0.0155344	0.00402533	0.0101489	0.00485822	0.00610738	0.011645	0.00847068	0.00861981	0.00956619	0.0063026	0.00597664	0.00787095	0.0110939	0.00254703
ENSG00000049245	0.00192396	0.00181521	0.000635662	0.00330419	0.00114987	0.00180637	0.00176717	0.00194378	0.00166275	0.00131477	0.00578829	0.00389806	0.00152239	0.0011073	0.00104352	0.00134181	0.00121675	0.00114845	0.00109603	0.0012826	0.000779905	0.00304279	0.0024684	0.00288463	0.00225062	0.00220529	0.00360036	0.00236506	0.00103107	0.00290382	0.00179644	0.000939446	0.00174448	0.00522012	0.00261237	0.00197156	0.00179823	0.00149289	0.0017722	0.00227062	0.00282349	0.00141895	0.00250295	0.00181791	0.00120128	0.00363144	0.00325385	0.0033331	0.000827379
ENSG00000269925	0.0785012	0.037601	0.0540238	0.0515429	0.000751776	0.0422438	0.0342794	0.055453	0.0523121	0.0674037	0.0450652	0.0641372	0.021041	0.0448613	0.0531932	0.0448633	0.0348373	0.0485916	0.0551933	0.0395672	0.0374836	0.0406374	0.0655403	0.0450547	0.0427337	0.0513761	0.066983	0.0542205	0.0596861	0.0519467	0.0383318	0.0359275	0.03581	0.0780004	0.0585676	0.0633631	0.0402847	0.00601337	0.0301475	0.0355274	0.0614659	0.039441	0.057388	0.0372763	0.0173098	0.037608	0.0439867	0.0563148	0.00817342
ENSG00000049246	0.00197611	0.00227014	0.00895913	0.00592355	0.00592679	0.00592274	0.00679469	0.00242752	0.00244456	0.00203731	0.893867	0.00743653	0.00484597	0.00805234	0.00414078	0.00153121	0.00418456	0.00554547	0.00239534	0.0047719	0.00207297	0.00425862	0.00806686	0.00675086	0.00311262	0.0369443	0.00431083	0.0134427	0.00324086	0.00354699	0.00481966	0.0311986	0.00435831	0.348171	0.00303206	0.00402814	0.00699989	0.00251965	0.00651783	0.0054159	0.00556598	0.00382419	0.00112017	0.00629049	0.00164423	0.0023256	0.0029542	0.00763553	0.00252233
ENSG00000236266	0.0152083	0.0172853	0.00585983	0.0655217	0.0701312	0.0588539	0.0546352	0.0111272	0.0100482	0.00791527	0.0245378	0.0137407	0.0127783	0.0201171	0.00623687	0.00730888	0.0198237	0.0161912	0.00617786	0.0358163	0.032557	0.057617	0.0812663	0.0105716	0.0161844	0.023026	0.0204308	0.03815	0.00770448	0.0261182	0.0138441	0.0481295	0.00969547	0.0441215	0.00609372	0.0108778	0.0515524	0.0104718	0.0833166	0.0415994	0.0282702	0.0152685	0.0353173	0.0233292	0.00681016	0.0122207	0.0120953	0.0134642	0.00895357
ENSG00000116288	0.0171792	0.0197334	0.0130794	0.014575	0.0053627	0.0129974	0.0260131	0.0253063	0.0227697	0.0148462	0.00329092	0.0175089	0.0221089	0.00899252	0.00173492	0.0175976	0.0157704	0.0161836	0.0190994	0.0161871	0.0143339	0.00845761	0.0226956	0.0120853	0.0208984	0.0133902	0.0221296	0.0114312	0.0132603	0.0171434	0.0266672	0.00535119	0.00945719	0.0172547	0.00944469	0.0219929	0.0183549	0.00955661	0.0118476	0.0117175	0.0161521	0.0145125	0.0041681	0.0153853	0.01094	0.00908295	0.0328349	0.0139255	0.0127728
ENSG00000116285	0.00590454	0.0145655	0.00217972	0.0111229	0.00405938	0.0221549	0.00504124	0.00212037	0.00376676	0.0059597	0.0182039	0.00100953	0.00174741	0.00255814	0.00178799	0.00373158	0.00332776	0.0112239	0.00413911	0.00131445	0.00367972	0.00438444	0.00192391	0.00174025	0.00318214	0.00848795	0.00803553	0.0159041	0.0089473	0.00644938	0.00227219	0.00936426	0.00313791	0.0769726	0.00281151	0.0257086	0.00480039	0.00250719	0.00106311	0.00241318	0.00782612	0.003938	0.00357872	0.00319178	0.00174502	0.00274543	0.00407858	0.00419979	0.00483515
ENSG00000238290	0.0979037	0.0493902	0.0701619	0.0819036	0.0587347	0.082166	0.0790998	0.0651927	0.0466319	0.0890792	0.396581	0.0707954	0.0909536	0.0648667	0.0641923	0.071648	0.0395014	0.0569115	0.0704761	0.0704918	0.0646438	0.0621699	0.077837	0.0669219	0.0473531	0.0810069	0.099773	0.0599578	0.0565513	0.0624143	0.0772913	0.0948135	0.0229164	0.262649	0.0748124	0.0463881	0.0777792	0.0578059	0.0619705	0.0659424	0.0611162	0.0871282	0.0809386	0.0743065	0.0455919	0.0530355	0.0521233	0.0694801	0.0737671
ENSG00000162426	0.0101011	0.00758506	0.00185861	0.00148795	0.00255271	0.00450447	0.00216163	0.00831724	0.00449068	0.00806631	0.0290178	0.0127049	0.0158294	0.00796825	0.00479051	0.00978203	0.00312768	0.0131216	0.00919354	0.00131208	0.000714994	0.00137097	0.00733925	0.00350901	0.00298463	0.00489193	0.0351137	0.0158329	0.00841518	0.00620183	0.0203554	0.00795598	0.0122202	0.0191652	0.0137596	0.00851695	2.54197e-05	0.00142953	0.00207644	0.003734	0.00719709	0.0116618	2.54197e-05	0.0133303	0.00806319	0.00229325	0.0103919	0.00751848	0.00300279
ENSG00000142599	0.00573087	0.00127147	2.54197e-05	0.00333864	0.000968554	0.00173957	0.00388785	0.0016853	0.00176866	0.00282337	0.00330825	0.00389704	0.00410148	0.00446603	0.00046693	0.00258262	0.00763293	0.00251213	0.0053196	0.00380683	0.00302923	0.00237298	0.00286361	0.00219423	0.00164567	0.00270322	0.00225272	0.00212905	0.00295086	0.00248521	0.00388894	0.00349657	0.00283618	0.0115058	0.00204225	0.00165238	0.00460099	0.000770027	0.00252276	0.00167208	0.00270065	0.0062082	0.0021243	0.00401437	0.000909869	0.00188112	0.00313605	0.00261752	0.00128542
ENSG00000232912	0.0257366	0.0310941	0.0273643	0.0470958	0.0294625	0.0502504	0.043193	0.0246622	0.00360249	0.0372743	0.0379247	0.051512	0.0557729	0.0285343	0.0179686	0.0305672	0.0384023	0.0306266	0.0447368	0.0427263	0.0477158	0.0471054	0.0495165	0.0479049	0.0137191	0.0377234	0.0349377	0.0493422	0.0496827	0.0161669	0.0537339	0.00737888	0.0407264	0.0186635	0.0287512	0.0502921	0.0424266	0.0313752	0.044458	0.042238	0.0453511	0.0439986	0.044923	0.0457579	0.0374487	0.038288	0.0451596	0.0320666	0.0348435
ENSG00000074800	0.0360357	0.0417232	0.0528833	0.0104683	0.0282232	0.0441324	0.0821305	0.0770285	0.0852785	0.0174102	0.0463029	0.0417703	0.0384305	0.0208547	0.0164642	0.0195038	0.0261901	0.0272648	0.0286684	0.0214873	0.0311033	0.0137712	0.0510961	0.0425857	0.0778697	0.028846	0.0125594	0.0283888	0.0474637	0.0715446	0.0302158	0.0317824	0.0360446	0.0156357	0.0537806	0.0497291	0.00674284	0.0204573	0.0220804	0.0250331	0.0313462	0.0280279	0.0602143	0.0155244	0.018628	0.0168112	0.00811463	0.0496886	0.0360404
ENSG00000131686	0.0285698	0.366425	0.210832	0.155342	0.323131	0.149764	0.25306	0.27373	0.369718	0.338467	0.276822	0.359735	0.0598167	0.173166	0.127535	0.320261	0.38858	0.313806	0.11477	0.174006	0.326279	0.163262	0.151164	0.307379	0.351998	0.325685	0.32129	0.268848	0.23642	0.430339	0.0394815	0.0609356	0.229246	0.0478402	0.250424	0.370678	0.248202	0.338292	0.264447	0.280823	0.148509	0.175732	0.262502	0.222876	0.316472	0.117843	0.109046	0.298966	0.303795
ENSG00000142583	0.144416	0.168539	0.0625164	0.0240291	0.0263601	0.0206283	0.0477371	0.050615	0.0807195	0.0491416	0.0237394	0.113101	0.0545922	0.0641063	0.00490928	0.0269091	0.104515	0.1098	0.108297	0.037516	0.0408334	0.0163934	0.012563	0.0562343	0.0444155	0.763647	0.134557	0.147061	0.0369065	0.238648	0.0936186	0.0181258	0.0877808	0.0680391	0.034159	0.209976	0.0205912	0.0259722	0.0328513	0.0195867	0.0180123	0.0278774	0.0551844	0.066976	0.0184445	0.0385649	0.0873099	0.105491	0.0638643
ENSG00000180758	0.0168824	0.017967	0.0173811	0.0242192	0.0271449	0.025543	0.0221551	0.0166801	0.00729808	0.0109194	0.0242744	0.00719257	0.0102958	0.00958237	0.00660387	0.00622498	0.0110589	0.0063642	0.0094579	0.0207676	0.0231271	0.0206619	0.0175357	0.00509001	0.00969734	0.0160613	0.00744411	0.00838981	0.010183	0.0126631	0.0112055	0.00735002	0.00561925	0.0402874	0.006841	0.0147568	0.0229518	0.0281303	0.0225113	0.0224182	0.0188064	0.00570766	0.00581908	0.0079189	0.0121664	0.0253837	0.00266779	0.0132568	0.00217872
ENSG00000228526	0.00948845	0.00877435	0.0105221	0.00752428	0.0193179	0.0348905	0.00734217	0.0149878	0.00891373	0.0063273	0.00764415	0.00543218	0.012199	0.00759732	0.00260883	0.00751309	0.00910635	0.00447458	0.00873061	0.00542991	0.0338803	0.0109746	0.0326457	0.00764549	0.0132849	0.00116309	0.0153236	0.0205431	0.00640556	0.00913843	0.0098174	0.00533324	0.00983347	0.0273383	2.54197e-05	0.0117922	0.0135069	0.0174446	0.00957287	0.0148252	0.0238832	0.0124055	0.00585064	0.00730193	0.00538375	0.0071512	0.00353908	0.00628958	0.00487246
ENSG00000234546	0.0670568	0.0327568	0.0234334	0.0382017	0.0490022	0.0368805	0.0361622	0.0413963	0.0275818	0.0520297	0.0140373	0.0138819	0.0229588	0.0384877	0.0123992	0.0165222	0.0417584	0.0245768	0.0374677	0.0347879	0.0391875	0.0370867	0.0400814	0.031788	0.0303981	0.00725688	0.0539265	0.0484525	0.0244256	0.0167104	0.0293339	0.0188325	0.021714	0.105575	0.00603882	0.0285468	0.0372052	0.0504076	0.0385053	0.0315271	0.038733	0.0260881	0.0401749	0.0344543	0.0142686	0.0166464	0.0133412	0.0118729	0.01315
ENSG00000049239	0.0105782	0.0197434	0.0102913	0.0106531	0.0751825	0.0165031	0.0117446	0.015447	0.0156726	0.0118523	0.0134911	0.0101738	0.00701637	0.0152797	0.0072835	0.00988077	0.0105869	0.0179143	0.00891847	0.0137538	0.0166437	0.013198	0.0223797	0.0145542	0.0178116	0.0244936	0.0121846	0.00738782	0.0123531	0.0103634	0.00755305	0.00930483	0.00900419	0.0202943	0.00570967	0.018137	0.0143779	0.0548273	0.0098993	0.0157218	0.0164565	0.0107437	0.0112402	0.0119836	0.00806996	0.00823669	0.0114942	0.00976068	0.0137512
ENSG00000171621	0.00508335	0.00588061	2.54197e-05	0.00852678	0.0351351	0.00924594	0.0098618	0.00363192	0.0047157	0.00905792	0.0771101	0.013566	0.00588332	0.00658123	0.00572469	0.0029082	0.00959789	0.00433599	0.00568731	0.00503687	0.00524742	0.00491756	0.0101311	0.00356377	0.00595494	0.013268	0.00993874	0.0149021	0.0078941	0.00683748	0.00718203	0.0120145	0.00663913	0.0712493	0.0164258	0.00480758	0.0273157	0.0185785	0.00611434	0.00883309	0.00820937	0.00658442	0.0157819	0.0066268	0.00662087	0.00578785	0.00545875	0.006091	0.00504086
ENSG00000171612	0.0208003	0.0226515	0.0155754	0.0400039	0.0083297	0.0092829	0.0104543	0.0155483	0.0261911	0.0129671	0.00391491	0.0195044	0.0101158	0.0256356	0.00529305	0.0136638	0.0122345	0.00583498	0.0104403	0.00509927	0.00759516	0.0193126	0.00660287	0.00346412	0.019928	0.00960431	0.00809072	0.00119807	0.0218437	0.0572764	0.0538793	0.0050796	0.0103393	0.0240812	2.54197e-05	0.03388	0.0231145	0.0463126	0.00189001	0.0316806	0.013957	0.00510628	0.0255299	0.0245743	2.54197e-05	0.00466183	0.00788944	0.0278995	0.020384
ENSG00000188807	0.00863286	0.00833564	0.027702	0.0112354	2.54197e-05	0.0110775	0.00658936	0.00952072	0.00434889	0.00878827	0.00623793	0.0111636	0.00597418	0.0246851	0.00382148	0.00733384	0.00592231	0.0105472	0.00877396	0.00449746	0.00290979	0.00372039	0.00132116	0.00660889	0.00231582	0.00162268	0.00247123	0.0107328	0.00445759	0.00503026	0.00349682	0.00493081	0.0114747	0.0123214	0.00819722	0.0155841	0.00416828	0.00415638	0.0027095	0.00697915	0.00671244	0.00943434	0.0167749	0.00833031	0.00137637	0.00930984	0.00802726	0.00141688	0.00193085
ENSG00000171608	0.0145063	0.0120103	0.0199344	0.0522887	0.0160027	0.0155434	0.0138238	0.0146436	0.00647984	0.0221829	0.00592581	0.0109596	0.023363	0.00912469	0.0113766	0.00174738	0.0104601	0.0082796	0.0071222	0.0189428	0.0152658	0.010278	0.0189055	0.00424572	0.0122904	0.0103952	0.0179597	0.00630413	0.0137196	0.00934538	0.0204878	0.00630545	0.0130834	0.0058975	0.00667232	0.016828	0.00897278	0.0300946	0.0300027	0.00759207	0.0147665	0.00696038	0.0042151	0.00604951	0.0151378	0.0217895	0.00282249	0.011433	0.00949714
ENSG00000171603	0.00240406	0.000593299	0.00162035	0.000623562	0.000615778	2.54197e-05	0.000688289	0.00170415	0.00159691	0.00191361	0.00673012	0.0236101	0.0026383	0.000653066	0.00118286	0.00174704	0.00166037	0.000418835	0.00186849	0.000698491	0.000712585	2.54197e-05	0.00321751	0.00206507	0.0011458	0.000548944	0.00180109	0.00633916	0.00144431	0.00131342	0.00459167	0.000694394	0.00202956	0.0113177	0.000197686	0.00092245	0.000309819	0.00153602	0.00124834	0.000173316	0.00398605	0.00278148	0.0019946	0.00184474	0.00055937	0.00164699	0.000633674	0.00235044	0.000678798
ENSG00000178585	0.00472198	0.0076753	0.00923049	0.0038525	0.00124233	0.00115155	0.00157518	0.00620499	0.0031234	0.00527021	0.0187685	0.0038488	0.0107429	0.00511995	0.00451314	0.0130756	0.00126337	0.00392914	0.00613367	0.00459757	0.00354756	0.00130253	0.0022765	0.00459697	0.00491856	0.0038322	0.00172555	0.00439665	0.00425163	0.00226046	0.0100963	0.00984135	0.0017727	0.0115955	0.00155873	0.00613038	0.0022841	0.00158065	0.00259826	0.0022829	0.00105639	0.0118275	0.00605336	0.00155108	0.00335243	0.00269152	0.00442867	0.00421721	0.00475798
ENSG00000162441	0.0104494	0.00686504	0.0108945	0.00321634	0.000430802	0.00851686	0.00498143	0.00820057	0.00352974	0.00712404	0.054054	0.00748427	0.00589073	0.00223299	0.0110291	2.54197e-05	0.00471689	0.00096573	0.00874099	0.00484534	0.00181918	0.00637718	0.00306311	0.00321465	0.00594835	0.00298307	0.00934998	0.00549605	0.00586707	0.00505347	0.00569196	0.00165546	0.00726597	0.0189613	0.00703617	0.0114291	0.00792454	0.00967713	0.00930404	0.00133293	0.0071832	0.00673517	2.54197e-05	0.0107624	0.0039003	0.00760748	0.00225353	0.00451064	0.00297717
ENSG00000173614	0.0652576	0.0495499	0.0266114	0.0469125	0.04924	0.0474169	0.0423763	0.0335119	0.0322678	0.0336166	0.0212627	0.0335782	0.0600462	0.00721512	0.0264208	0.0317281	0.0365632	0.0873915	0.0198466	0.0599936	0.0427396	0.0419418	0.0405202	0.0283316	0.0194055	0.0522039	0.0630797	0.0511629	0.0333202	0.0627425	0.0442858	0.0323856	0.0300831	0.0803191	2.54197e-05	0.0517427	0.0457951	0.049963	0.0407679	0.0416125	0.0374892	0.0161813	0.0267789	0.0523883	0.0299217	0.0416037	0.00534551	0.03218	0.0307979
ENSG00000162444	0.0411168	0.00434428	0.0180159	0.0638457	0.0732649	0.036095	0.126455	2.54197e-05	0.039242	0.0220013	0.109314	0.0490696	0.0196061	0.0517885	0.151192	0.0040968	0.0348416	2.54197e-05	0.0164194	0.082183	0.0917158	0.0692539	0.126174	0.00552218	0.00492997	0.152674	0.0122266	0.0824083	0.0158979	0.0289129	0.0216802	0.00656785	0.0275367	0.0701951	0.0431018	0.0373221	0.0894976	0.0450515	0.0862083	0.0894013	0.0160461	0.0127782	0.0472241	0.0485354	0.0773039	0.013168	0.0316186	0.0635873	0.0264683
ENSG00000130939	0.00867207	0.0065417	0.00531878	0.00406992	0.0072788	0.00787639	0.009916	0.00477092	0.00531694	0.0059328	0.00541238	0.00611936	0.00594136	0.00451597	0.00825187	0.00220864	0.00901062	0.0105648	0.00859941	0.00439877	0.00766165	0.00745318	0.00450003	0.00537005	0.00491792	0.00667251	0.00474632	0.00417059	0.0096442	0.00612527	0.00635785	0.00502744	0.00916175	0.0235128	0.0063764	0.00553612	2.54197e-05	0.0105491	0.00480385	0.00316453	0.00288694	0.00491892	0.00658342	0.00716042	0.00898529	0.0053425	0.00543077	0.00763989	0.00464353
ENSG00000054523	0.00728797	0.00118903	0.0028581	0.0150202	0.0255109	0.0181231	0.0189361	0.00419681	0.00427367	0.00191149	0.0423367	0.00484802	0.00616376	0.00532045	0.00473096	0.00393295	0.00608885	0.00526758	0.0068213	0.0168388	0.0166131	0.0180423	0.015499	0.00483243	0.00365572	0.00388664	0.00341625	0.00636102	0.00534949	0.00418683	0.00501354	0.00627699	0.00579437	0.00939747	0.00833204	0.00434145	0.0170528	0.0222711	0.0227043	0.0205123	0.0138805	0.00620473	0.00558153	0.00566284	0.00408856	0.0073522	0.00669301	0.00435362	0.00358111
ENSG00000142657	0.0020147	0.00307154	0.0260608	0.00415054	0.00116978	0.00376368	0.00533576	0.00550947	0.0131013	0.00221949	0.00383884	0.00505196	0.00518467	0.00478573	0.0013068	0.0020583	0.00110584	0.00552782	0.001443	0.00130266	0.00439721	0.0015437	0.000653517	0.000857535	0.00524897	0.064721	0.00341778	0.0109398	0.00304229	0.00907902	0.0108154	0.00086645	0.00295526	0.00416671	0.0083563	0.00570758	0.003057	0.00567237	0.00106148	0.00236968	0.00192734	0.0021583	0.000204236	0.00280234	0.0099063	0.00677704	0.00119022	0.0133887	0.00559208
ENSG00000175279	0.0356294	0.0338155	0.02049	0.0861666	0.0060612	0.00886513	0.0120396	0.0214822	0.0219296	0.0243324	0.00763469	0.0150383	0.0349238	0.0103033	0.00148479	0.0327493	0.0176114	0.0293392	0.0203309	0.0149827	0.0250706	2.54197e-05	0.0177447	0.0264421	0.0192884	0.0101472	0.0299941	2.54197e-05	0.00948536	0.0198065	0.0398221	0.00725736	0.0136142	0.0359229	0.0143442	0.0250693	0.0198778	0.0283317	0.0102467	0.00289299	0.0339689	0.0156813	0.00569373	0.0128174	0.00421983	0.00639653	0.00250223	0.00727148	0.0147535
ENSG00000160049	0.0195434	0.0130174	0.0599724	0.00363848	0.0110697	0.00539256	0.0162418	0.0073951	0.0088689	0.00932245	0.00490439	0.01481	0.0105822	0.0034778	0.00354907	0.0129758	0.0093997	0.00981376	0.0141197	0.0116317	0.00968812	0.0296021	0.00186319	0.0140096	0.0132751	0.0164363	0.01019	0.0047951	0.0193301	0.00893781	0.0214618	0.0155587	0.0113401	0.0528896	0.00377646	0.0268995	0.00801207	0.0105639	0.00858164	0.0112969	0.011803	0.00698812	0.0101637	0.0275942	0.0135923	0.015857	0.00371602	0.0111311	0.00455839
ENSG00000142655	0.0139138	0.00474633	0.0138193	0.0113635	0.0128662	0.041574	0.0205149	0.0106249	0.00776391	0.00712324	0.00942452	0.00610503	0.00655308	0.00745795	0.00328284	0.00565602	0.00862423	0.00537237	0.00941253	0.0113213	0.00739843	0.0181561	0.00807848	0.0058844	0.0126623	0.00242086	0.00593977	0.0195813	0.00960607	0.008007	0.00851464	0.00692322	0.0068194	0.0162965	0.00497981	0.00689139	0.00910607	0.00630209	0.00408053	0.00539698	0.0157096	0.00622453	0.0103242	0.0156178	0.000825017	0.00409512	0.00478888	0.00386566	0.00649387
ENSG00000130940	0.0153132	0.00702469	0.00541897	0.0332508	0.0346959	0.0378136	0.0294457	0.00479782	0.0046917	0.00440847	0.00484623	0.00707877	0.00294225	0.00623618	0.00610017	0.00687628	0.00769937	0.0122692	0.00309018	0.0278558	0.044764	2.54197e-05	0.0320155	0.00469159	0.00699465	0.0213311	0.00447044	0.0139637	0.0150271	0.0029087	0.00339071	0.0112371	0.00798854	0.0126311	0.0148191	0.00520907	0.0282083	0.0299071	0.0528685	0.0255804	0.0204257	0.00347969	0.00718506	0.00325494	0.025133	0.00890832	0.00394149	0.00295489	0.0143801
ENSG00000272078	0.0234787	0.00724937	0.0136616	0.0251854	0.0286208	0.0306459	0.0275541	0.00567343	0.00519605	0.00285457	0.00432649	0.00299478	0.00391042	0.00623625	0.00676167	0.00792496	0.00730489	0.00935997	0.00286998	0.0318676	0.0544513	0.0213106	0.0265522	0.00448969	0.00691307	0.0257797	0.00477962	0.022001	0.020576	0.00297916	0.00395004	0.00865768	0.00968653	0.0107465	0.0228343	0.00561967	0.0200935	0.0265845	0.0165322	0.026672	0.0254682	0.00367928	0.0037048	0.00431873	0.0466859	0.00724386	0.00364171	0.00270375	0.016644
ENSG00000120948	0.0123452	0.0161591	0.01031	0.0113699	0.00687649	0.0553444	0.00744925	0.0112628	0.00984351	0.00939311	0.00579888	0.00766489	0.00581797	0.0103364	0.00772251	0.00450476	0.0122492	0.00529832	0.0125059	0.00507861	0.0166183	0.0113483	0.039454	0.0107681	0.00773355	0.00581837	0.00692104	0.020864	0.0127487	0.0102199	0.0101626	0.00693138	0.00795887	0.0377644	0.0117684	0.00928117	0.0500495	0.00701965	0.00617514	0.0162975	0.0100336	0.00570678	0.0095971	0.0119956	0.0102675	0.00949449	0.00704263	0.00993237	0.0159237
ENSG00000009724	0.0153791	0.01457	0.00691854	0.0661859	0.00955647	0.015645	0.0145134	0.00967294	0.00454273	0.0123295	2.54197e-05	0.00506973	0.00970379	0.00249633	0.00732658	0.0154237	0.00354551	0.00887692	0.00945134	0.00611283	0.00797233	0.0165765	0.0018232	0.00592271	0.00486424	0.00928053	0.0199075	0.0281483	0.0174438	0.015486	0.010042	0.0150053	0.012502	0.0284467	0.0173637	0.00938873	0.0253836	0.0152525	0.0102254	0.0153175	0.00885534	0.00496243	0.00078621	0.0115302	0.00465587	0.0110756	0.00592288	0.0120083	0.00937274
ENSG00000271895	0.0316208	0.0286993	0.00862487	0.0126434	0.00641763	0.0113842	0.0111687	2.54197e-05	0.0298669	0.0215782	0.0120625	0.0134768	0.0139254	0.0106103	0.0113333	0.0160335	2.54197e-05	0.0180689	0.014562	0.00978017	0.00979994	0.0102876	0.0111955	2.54197e-05	0.0165836	0.0221439	0.0200608	0.0200547	0.0162346	0.0181194	0.02441	0.0145523	2.54197e-05	0.0260276	0.0180293	2.54197e-05	0.0129191	0.0064516	0.00948456	0.00953492	0.0101426	0.0140923	0.0177431	0.0472058	0.0118619	0.0181883	0.0158218	0.0197398	0.0116263
ENSG00000116649	0.00246804	2.54197e-05	0.00157543	2.54197e-05	0.00573366	0.0122716	0.00142378	0.000359546	0.00205258	0.00206465	0.00204364	0.0123787	0.00156375	0.00131884	0.00233021	0.000790103	0.000250995	0.00281064	0.00187122	2.54197e-05	8.83219e-05	0.00162076	0.00324287	0.00462628	2.54197e-05	0.000502854	0.000582571	0.00532904	0.00143407	0.00247042	0.00242936	0.00533876	0.00156659	0.00993107	0.00231856	0.0013838	2.54197e-05	0.00446505	0.000330633	0.000550931	2.54197e-05	0.00199411	0.00182109	0.00150159	0.00118655	0.000562207	0.00524396	0.00515095	0.00703633
ENSG00000171824	0.00518685	0.00533997	0.00904681	0.00978475	0.00930176	0.0108033	0.00508847	0.00487287	0.00482361	0.00456822	0.00265436	0.00469768	0.00335171	0.00315236	0.00328818	0.0082875	0.00419356	0.00367538	0.00392128	0.00419828	0.00886039	0.00616316	0.0094457	0.00414876	0.00540578	0.00319069	0.00416718	0.00434839	0.00325955	0.00530997	0.00442966	0.00418677	0.00485043	0.00786943	0.00392011	0.00454202	0.0088336	0.0125394	0.00689042	0.00611571	0.0087942	0.00283131	0.00464009	0.00560373	0.00563204	0.00676208	0.00422459	0.0046744	0.00533851
ENSG00000226849	0.00594514	0.00605906	0.00656216	0.0130983	0.0100792	0.0130729	0.00716944	0.00434073	0.00439285	0.00415348	0.00138778	0.00683233	0.0027989	0.00364272	0.00443726	0.010764	0.00356232	0.0026343	0.00589512	0.00454364	0.00900355	0.010124	0.00702949	0.00346254	0.00607654	0.00318669	0.00383377	0.00239889	0.00360143	0.00503695	0.00435509	0.0029998	0.00547828	0.011247	0.00371903	0.00575466	0.0097276	0.0137553	0.00748598	0.00736285	0.00462759	0.00316553	0.00510011	0.00526979	0.00720334	0.00680067	0.0034274	0.00511564	0.00450696
ENSG00000230337	0.00207316	5.362e-05	0.00576101	0.00785286	2.54197e-05	0.00795578	0.00793887	0.0189951	2.54197e-05	0.00688918	2.54197e-05	0.00695414	0.0031912	0.00944553	2.54197e-05	0.0383931	0.0161438	0.00108985	0.00510707	0.0105266	2.54197e-05	0.00764206	0.00858017	0.00182613	0.00855329	0.00111322	0.00861599	0.00726094	0.00278346	2.54197e-05	0.0157137	0.00759337	0.00611222	0.0107113	2.54197e-05	2.54197e-05	2.54197e-05	0.00319813	0.00492739	0.0223231	0.00746846	0.00200184	0.00610001	0.00339641	0.0100565	0.00402332	0.0144857	2.54197e-05	0.00123143
ENSG00000198793	0.00549088	0.00721266	0.0124442	0.00534352	0.00161101	0.00674775	0.00228929	0.00603087	0.00356368	0.00317404	0.00135299	0.00175299	0.00268738	0.00268591	0.00107721	0.0133913	0.0048966	0.00429873	0.00482272	0.00172541	0.00614273	0.00776943	0.00594062	0.00312369	0.00401876	0.00206139	0.00209057	0.00145477	0.00458422	0.00384006	0.00277333	0.00208925	0.00331798	0.00992446	0.0025926	0.00681875	0.00274578	0.000422865	0.00128087	0.00340709	0.000696952	0.00255598	0.00200029	0.00363646	0.00448642	0.00279375	2.54197e-05	0.00217154	0.00231193
ENSG00000225602	0.0225511	0.0100274	0.0131259	0.0235348	0.0118073	0.0290865	0.0252348	0.0135705	0.00475922	0.00542535	0.0015538	0.0249298	0.0174489	0.0241517	0.000247639	0.0150581	0.0188852	0.022485	0.0123901	0.0173973	0.0182172	0.0551827	0.0215806	0.00323821	0.0102108	2.54197e-05	0.0109747	0.0239346	0.0273264	0.0125995	0.0106662	0.0296407	0.0199242	0.0323011	0.0100944	0.0123072	0.0446355	0.0165977	0.0206275	0.00919632	0.0367866	0.0175497	0.0234565	0.0272648	0.0347932	2.54197e-05	0.0078672	0.0118518	2.54197e-05
ENSG00000171819	0.0548805	0.0507691	0.0690883	0.0978154	0.00524046	0.0970435	0.0705776	0.0702549	0.0635721	0.0355688	0.265082	0.123168	0.0185252	0.142882	0.147078	0.183406	0.0256856	0.0582259	0.131085	0.06694	0.0789427	0.0545571	0.121024	0.0734691	0.0399172	0.159454	0.0649418	0.125484	0.014248	0.025952	0.0387244	0.174199	0.1245	0.20915	0.0762143	0.0741162	0.0759879	0.0195199	0.0670817	0.0789102	0.104636	0.129403	0.0934038	0.116964	0.138802	0.018149	0.0646462	0.01693	0.099331
ENSG00000120942	0.0180353	0.0102286	0.0142692	0.0157277	0.0255264	0.0199584	0.00750105	0.0319779	0.0145266	0.00856051	0.0173883	0.0119064	0.0196121	0.011333	0.00801416	2.54197e-05	0.0117938	0.0204709	0.00414795	2.54197e-05	0.0152287	0.0464449	0.0181339	0.00475632	0.0155163	0.00383507	0.0143531	2.54197e-05	0.0102008	0.0386561	0.00837586	0.00295391	0.0191302	0.0229347	0.0122656	0.0122005	0.0153965	0.0237232	0.0153352	2.54197e-05	0.00970855	0.00924365	0.0680187	0.0159147	0.0033219	0.00607489	0.0292761	0.00760116	0.00479641
ENSG00000116661	0.0813856	0.0600324	0.0215782	0.0131764	0.00478103	0.0104828	0.00697696	0.0268155	0.0300014	0.0188877	0.0671346	0.0584405	0.0167711	0.0297635	0.00971969	0.0108009	0.0262818	0.0318878	0.0131773	0.00609808	0.00414431	0.0117167	0.00715025	0.0179568	0.0352374	0.0696152	0.0435885	0.0130607	0.0105489	0.0203041	0.0120582	0.0295655	0.0331616	0.134897	0.0312734	0.0677448	0.00901128	0.00302583	0.00747932	0.00386399	0.00771245	0.0180753	0.0406152	0.0600221	0.0867643	0.0083891	0.0174079	0.0296219	0.0573722
ENSG00000132879	0.0140708	0.019422	0.0406763	0.0161993	0.0102328	0.0127101	0.0192777	0.0115911	0.0137276	0.0137323	0.0195597	0.01501	0.00992567	0.0146141	0.0104785	0.0106818	0.0144669	0.0168678	0.0122935	0.0142407	0.0150291	0.0150721	0.00779231	0.020509	0.011266	0.0180223	0.0168127	0.0112357	0.0115654	0.0106221	0.0094926	0.00889211	0.0127493	0.0226816	0.0139424	0.0203796	0.0151159	0.00928834	0.0173507	0.0164403	0.0148408	0.0101216	0.0117836	0.00967795	0.00967715	0.0159276	0.0184517	0.0127167	0.00646354
ENSG00000116663	0.0295016	0.0370231	0.0190767	0.0306351	0.0187878	0.0317016	0.0334071	0.0325846	0.018732	0.0252951	0.0315371	0.02201	0.0320167	0.0492482	0.0148534	0.0163584	0.0302963	0.0279414	0.0260035	0.0235414	0.0226921	0.031486	0.0248194	0.0340529	0.0190973	0.0227369	0.0310121	0.035513	0.0186103	0.0244539	0.0280274	0.0184978	0.0334366	0.031566	0.0212693	0.0422303	0.0215745	0.0151845	0.0218483	0.0157699	0.0370827	0.0302424	0.0455927	0.0259488	0.0275152	0.0290157	0.038752	0.0341979	0.0135913
ENSG00000116670	0.0481799	0.0361394	0.0399938	0.0268304	0.0455342	0.0281656	0.0272625	0.0493115	0.0396466	0.0518491	0.00403985	0.0481541	0.0297642	0.0176607	0.00232191	0.0448229	0.0336717	0.0442664	0.0510053	0.00782451	0.0291671	2.54197e-05	0.0270253	0.0400822	0.0247491	0.0263451	0.0436503	0.0447133	0.0408907	0.0309706	0.027822	0.0343948	0.0414631	0.0388093	0.0410986	0.0610056	0.0265373	0.0473646	0.0457004	0.0293743	0.0246366	0.0647951	0.0426005	0.0398803	0.0229934	0.0254758	0.0452759	0.0434937	0.0342716
ENSG00000177674	0.00675155	0.0126926	0.000878581	0.00676861	0.00337485	0.0116281	0.00282386	0.00730433	0.00703854	0.00738044	0.016659	0.0114066	0.0157669	0.00810716	0.00510637	0.00716858	0.00582212	0.00830357	0.00883053	0.00338763	0.00650559	0.00563386	0.00544974	0.00792952	0.010658	0.00492717	0.0112079	0.0134636	0.00546106	0.00894087	0.0114723	0.00495567	0.0142187	0.00600092	0.0087741	0.00751582	0.00776458	0.0312867	0.01112	0.00358377	0.0170029	0.0171348	0.00539623	0.00496142	0.00830929	0.00555767	0.00651347	0.00837908	0.00332227
ENSG00000177000	0.0148421	0.00962989	0.0228599	0.00650893	0.0097397	0.00476916	0.00868529	0.0121391	0.00860635	0.00691599	0.0265519	0.0147429	0.0108059	0.0115688	0.0087534	0.0134386	0.0167745	0.0083167	0.0130481	0.00617621	0.00546045	0.00461622	0.00559746	0.00956171	0.010762	0.0120654	0.0100272	0.0219599	0.00865819	0.00878976	0.0122268	0.0138871	0.0111034	0.0219883	0.0122317	0.0139775	0.00860911	0.0129193	0.00606102	0.00711239	0.0155077	0.0104314	0.0128399	0.0119266	0.0385085	0.00603449	0.00917119	0.0136251	0.0127044
ENSG00000011021	0.00448724	0.00373936	0.00579935	0.00103059	0.00458528	0.00326576	0.000676611	0.0014512	0.00216269	0.00502666	0.00167711	0.00481498	0.00515345	0.00361289	0.00968222	0.00312904	0.00452481	0.00403576	0.0025765	0.00254882	0.00213265	0.00513892	0.00613828	0.00404537	0.00325213	0.00245454	0.00486109	0.0102432	0.00406048	0.00444325	0.00626943	0.00383363	0.00289218	0.0276548	0.00325086	0.00381362	0.00230749	0.00457948	0.00230884	0.00154979	0.00129337	0.00410645	0.00414346	0.00568358	0.00303736	0.00430969	0.00522792	0.0028954	0.00235892
ENSG00000242349	0.629603	0.893867	0.608016	0.607397	0.730168	0.332253	0.893867	0.508137	0.710365	0.32434	0.377487	0.665027	0.754307	0.417907	0.0832561	0.54997	0.620757	0.682821	0.749495	0.893867	0.301664	0.424915	0.868073	0.671384	0.590242	0.893867	0.375675	0.47137	0.716193	0.421936	0.807573	0.40982	0.638426	0.475478	0.666267	0.792861	0.47408	0.767696	0.266033	0.865611	0.792943	0.680105	0.671386	0.382131	0.68461	0.357633	0.594213	0.605448	0.58834
ENSG00000175206	0.767683	0.893867	0.50568	0.65587	0.687044	0.335726	0.542539	0.523738	0.817855	0.0705606	0.573716	0.80881	0.893867	0.403614	0.0820129	0.535049	0.788968	0.862784	0.829425	0.893867	0.303456	0.502219	0.893867	0.712786	0.66547	0.893867	0.370551	0.586981	0.893867	0.436296	0.893867	0.338331	0.662036	0.51706	0.709261	0.893867	0.463233	0.864558	0.239662	0.893867	0.893867	0.893867	0.462778	0.403956	0.771384	0.270262	0.668357	0.65591	0.5884
ENSG00000116685	0.00522321	0.00294129	0.0066868	0.00292149	0.00313306	0.00485382	0.00393964	0.00289561	0.00215761	0.00161787	0.00589096	0.00699006	0.00438924	0.00264883	0.00389578	0.00658076	0.00533454	0.00299119	0.00293501	0.00202385	0.00237823	0.00687696	0.00808058	0.00133081	0.00394316	0.00149164	0.0017443	0.00146454	0.00493875	0.00248473	0.00389907	0.0019219	0.00197793	0.013347	0.00253056	0.00236308	0.00224323	0.00114618	0.00472	0.00477304	0.00166872	0.00186539	0.000928782	0.00515986	0.00198016	0.00114409	0.00238302	0.00186341	0.00302601
ENSG00000083444	0.00875496	0.00611827	0.00439438	0.00836368	0.0199649	0.00917066	0.00914904	0.0114546	0.00824671	0.00723935	0.0100566	0.00808278	0.00779989	0.00946007	0.00864058	0.00427334	0.00931179	0.0056096	0.00763743	0.00691454	0.014893	0.00910299	0.00649037	0.00636835	0.0138691	0.00392968	0.00489296	0.0116458	0.00904309	0.00780642	0.00594608	0.0174294	0.0053721	0.052615	0.00440463	0.00789454	0.0105828	0.0251145	0.0153946	0.0146874	0.00852694	0.00523792	0.00513572	0.0103233	0.00450008	0.0096535	0.0037578	0.00491695	0.00589478
ENSG00000116688	0.00563625	0.00397294	0.00366978	0.00228128	0.0035727	0.00599002	0.00193351	0.00369381	0.00318138	0.00756159	0.00379961	0.00610614	0.0044653	0.00408407	0.0185601	0.00791854	0.00548994	0.00505706	0.00562096	0.00244491	0.00226426	0.00324302	0.00523083	0.00562833	0.0032148	0.00748897	0.0058207	0.00321942	0.00305106	0.00498861	0.00507094	0.0135033	0.00186804	0.1079	0.00262069	0.00453017	0.00152785	0.00374088	0.00310969	0.00281794	0.00273317	0.00725523	0.00180468	0.00843063	0.00326316	0.00381074	0.0034823	0.00534929	0.00421839
ENSG00000116691	0.00446651	0.00504673	0.000958924	0.00249407	0.00133292	0.0101398	0.0117388	0.00454784	0.00553622	0.00366361	0.00230274	0.00385763	0.00431868	0.00722062	0.0022346	0.00331791	0.00581336	0.00548181	0.00469597	0.00171835	0.00180846	0.013105	0.0113382	0.00569421	0.00317459	0.00314157	0.00270615	0.00117958	0.00575007	0.0143767	0.00666089	0.0103761	0.00698322	0.0225226	0.0067077	0.00678037	0.00393862	0.00757125	0.00549951	0.00579212	0.00716024	0.00490784	0.0163278	0.00409866	0.00712907	0.0016818	0.00312384	0.00545476	0.0067737
ENSG00000120949	0.020842	0.0242651	0.0191334	0.0813351	0.118825	0.0921221	0.0706237	0.0315911	0.0285825	0.0194931	0.00460005	0.0367423	0.0304138	0.0285319	2.54197e-05	0.0252948	0.0166232	0.0208166	0.0148604	0.02731	0.104211	0.0701774	0.0745729	0.0267499	0.0317726	0.0481793	0.0387409	0.0445676	0.0228232	0.0316225	0.0268643	0.0228574	0.033651	0.0217838	0.0306201	0.0302294	0.0854352	0.120135	0.0927664	0.0465262	0.0691749	0.0287894	0.0327024	0.0275338	0.0275536	0.0633601	0.0249881	0.0211174	0.0196497
ENSG00000028137	0.00337789	0.00757261	0.00141017	0.00428565	0.0176063	0.00998435	0.0124919	0.00566818	0.00547661	0.00532067	0.00707763	0.018795	0.00621998	0.0057234	0.00723565	0.00390771	0.00389321	0.00414061	0.00347466	0.00308964	0.00789153	0.00777891	0.00937087	0.00472894	0.00450365	0.00973976	0.00484048	0.00991123	0.00331458	0.00438676	0.0086975	0.00435944	0.00529911	0.00500772	0.00655262	0.0059008	0.00684005	0.0149482	0.00714212	0.00326169	0.00421417	0.00665299	0.0047356	0.00337315	0.00579368	0.00579711	0.00475976	0.00643649	0.00420391
ENSG00000048707	0.0094471	0.00485268	0.00806443	0.0110396	0.00577354	0.00477718	0.00557961	0.00600436	0.00475431	0.0064979	0.0159258	0.0134743	0.00537449	0.00371677	0.00358504	0.00418684	0.00595725	0.0116422	0.00643815	0.00848689	0.00486159	0.0114731	0.00523272	0.0044278	0.00351948	0.0062825	0.0026783	0.0066943	0.012835	0.00889912	0.00700678	0.007339	0.0060514	0.0314217	0.00413397	0.00865739	0.00817771	0.0093945	0.00658826	0.00332914	0.00938389	0.00663354	0.0193916	0.0123647	0.0102647	0.00546463	0.00756583	0.00539554	0.0101529
ENSG00000162496	0.00110055	0.00145013	0.000695144	0.00317254	0.0238729	0.00294823	0.00328303	0.000841839	0.000744683	0.00384008	0.0230533	0.00139208	0.00167189	0.00208436	0.0030488	0.00179548	0.00119174	0.00151464	0.00108404	0.00299683	0.00523735	0.00234452	0.00298449	0.00130207	0.00146961	0.00399468	0.00171241	0.0012786	0.00136527	0.0010299	0.00109255	0.00262351	0.00592581	0.0070454	0.00276648	0.0014111	0.0020287	0.00671805	0.00455291	0.00377655	0.000651833	0.00100621	0.00242922	0.00160122	0.00277649	0.00124105	0.00113633	0.00127012	0.0026392
ENSG00000276830	0.0544365	0.0769726	NA	NA	NA	NA	NA	NA	NA	NA	NA	NA	NA	NA	NA	0.0713469	0.0732471	NA	0.0429809	NA	NA	NA	NA	NA	NA	NA	NA	0.103739	0.0560206	0.0648384	NA	NA	0.0772525	NA	NA	0.0667518	NA	NA	NA	NA	NA	0.044479	NA	NA	NA	NA	NA	NA	NA
ENSG00000162493	0.0529954	0.0559638	0.0145086	0.0131335	0.0197376	0.0132431	0.0125168	0.0357728	0.0395878	0.0154813	0.199269	0.0277763	0.0146951	0.0268433	0.0118478	0.0167313	0.0195767	0.0485588	0.0215847	0.0101306	0.0170871	0.0217344	0.00918462	0.029351	0.0382561	0.107498	0.0193721	0.0748033	0.0192081	0.0110602	0.0199172	0.120139	0.0201588	0.160965	0.0250866	0.0601185	0.0282446	0.0165443	0.0288812	0.0151485	0.00532077	0.0170068	0.12884	0.0214089	0.0236875	0.014246	0.00607533	0.0233236	0.0464954
ENSG00000116731	0.00424383	0.00481596	0.00325941	0.0093509	0.00442664	0.0097994	0.00410961	0.00290357	0.00369429	0.0052375	0.0043784	0.00523824	0.00301904	0.0048742	0.00292564	0.00564974	0.00361198	0.00498531	0.00296456	0.00630902	0.00451074	0.00843028	0.00528093	0.00346224	0.00477081	0.00326555	0.00507695	0.00716843	0.00215547	0.00432143	0.00466658	0.00439469	0.00454243	0.00669602	0.00633759	0.0030645	0.00492138	0.00600436	0.00363373	0.00314455	0.00942613	0.0031385	0.00181079	0.00332278	0.00529476	0.00276667	0.00387458	0.00375341	0.00488419
ENSG00000189337	0.00636694	0.00798996	0.00327592	0.00195513	0.00980526	0.00173735	0.00347983	0.00658487	0.00607851	0.00616041	0.0462334	0.0112909	0.00716535	0.00659282	0.00328041	0.00676146	0.00637004	0.00620632	0.00520938	0.00379027	0.00251287	0.00324952	0.00203375	0.00809702	0.00789439	0.00738114	0.00456839	0.00751422	0.00434032	0.00909218	0.00571246	0.00521155	0.00815156	0.137531	0.0548484	0.00726532	0.00286961	0.0089896	0.00315701	0.0035697	0.00444187	0.00455544	0.00578827	0.00816407	0.00806067	0.0327631	0.00764101	0.00767189	0.00964739
ENSG00000175147	0.0151812	0.0116655	0.0161558	0.00331748	0.0171346	0.00233141	0.00441461	0.0121225	0.0129041	0.0145046	0.0715002	0.015167	0.0301943	0.0128145	0.0107367	0.0267182	0.0116191	0.00886742	0.0132091	0.00513743	0.00328427	0.00475133	0.00259893	0.0140123	0.0164555	0.0252779	0.018037	0.0109157	0.00570016	0.0180449	0.0201149	0.00852827	0.0215322	0.26719	0.133454	0.0084881	0.00499826	0.017667	0.00532071	0.00398864	0.00619104	0.0226306	0.0138183	0.0142969	0.0190282	0.069828	0.0200623	0.0123198	0.0173165
ENSG00000171729	0.0120696	0.0297948	0.00156838	0.00835338	0.0139459	0.00579587	0.00402737	0.0165819	0.0241713	0.0125585	0.0860957	0.00509303	0.0346262	0.0106388	0.00663634	0.0222873	0.0198943	0.00578365	0.0153488	0.00252509	0.00729793	0.01103	0.0173402	0.0103546	0.021156	0.0227455	0.018372	0.0365249	0.0153769	0.0105655	0.0413072	0.0111979	0.0156636	0.0600879	0.0285521	0.014716	0.0140623	0.0135688	0.0168524	0.00752442	0.0230228	0.0149698	0.00236076	0.00781706	0.0216316	0.0222785	0.0115195	0.0049796	0.0251252
ENSG00000142634	0.00487315	0.00469421	0.00493935	0.00282352	0.00916069	0.00516156	0.00773154	0.00373447	0.00377223	0.00395336	0.00566058	0.00311777	0.00563018	0.00555725	0.00789045	0.00547613	0.00444037	0.0047724	0.00503339	0.00414488	0.00318194	0.00418762	0.00333949	0.00364327	0.00396114	0.00455931	0.00742239	0.011125	0.00622737	0.00473459	0.00643967	0.00499675	0.00930123	0.00545239	0.00880255	0.00559904	0.00131953	0.0115988	0.00301533	0.00749839	0.00332367	0.00737071	0.00816474	0.00504178	0.00710001	0.00694869	0.00462276	0.00226773	0.00838251
ENSG00000142615	0.324789	0.315565	0.235954	0.241388	0.0274553	0.103225	0.289387	0.296323	0.877418	0.586994	0.93715	0.0252322	0.527148	0.302052	0.12726	0.29465	0.346816	0.45764	0.40371	0.197979	0.0915149	0.192717	0.382127	0.430513	0.682972	0.893867	0.596234	0.152935	0.229413	0.597783	0.537996	0.429092	0.158472	0.842781	0.600334	0.495884	0.175688	0.0200777	0.176664	0.196401	0.308025	0.585541	0.233333	0.489718	0.457435	0.145795	0.294852	0.249104	0.292027
ENSG00000215704	0.198449	0.209518	0.11882	0.0937986	0.0287244	0.0759836	0.0840486	0.248826	0.184887	0.190255	0.325861	0.0161181	0.191361	0.13019	0.032625	0.114432	0.144986	0.143804	0.239827	0.0866511	0.0806548	0.0570018	0.102603	0.168163	0.166285	0.17454	0.450401	0.103688	0.104185	0.147595	0.198395	0.126201	0.0618738	0.167044	0.244301	0.10182	0.0518457	0.0812778	0.0551937	0.0646933	0.116256	0.0841408	0.110924	0.193701	0.0533659	0.036079	0.100883	0.128701	0.122379
ENSG00000132906	0.0169357	0.0105458	0.026649	0.00362019	0.00236549	0.00165503	0.00740408	0.0252074	0.0144469	0.0287913	0.000239113	0.0185958	0.0103646	0.0169997	0.00315528	0.0110868	0.0265379	0.0155566	0.0182452	0.00480968	0.00441653	0.00657767	0.0113433	0.0223421	0.017705	0.0136889	0.0236159	0.0202659	0.0147675	0.0252188	0.00829218	0.01736	0.0131606	0.00629471	0.020415	0.0105829	0.0080864	0.00477442	0.00038678	0.00132682	0.00767461	0.0168286	0.0331891	0.0145663	0.0399955	0.00566368	0.0139961	0.0223464	0.0175486
ENSG00000116138	0.00822535	0.008905	2.54197e-05	0.00165892	0.00136864	0.00585288	0.00430552	0.00378089	0.00397785	0.000465477	0.00959299	0.00944945	0.00867646	0.00413729	0.00350964	0.00278962	0.00285045	0.00951344	0.00748547	0.00366473	0.00658272	0.00557582	0.0111307	0.00286542	0.00283747	0.0020495	0.00213791	0.0175145	0.00748528	0.000311563	0.00705512	0.00928603	0.00549629	0.0102676	0.00530031	0.00995789	0.00942506	0.00421963	0.00557015	0.00473656	0.0236653	0.00363499	0.00947009	0.00372392	0.00454422	0.00298568	0.00407222	0.00811285	0.00262737
ENSG00000197312	0.00417608	0.00680644	0.00405049	0.00440794	0.00190627	0.00377257	0.00719762	0.00550642	0.00386304	0.00406383	0.00293129	0.00626589	0.00523597	0.00414463	0.00152203	0.00174754	0.00659471	0.00730787	0.00485098	0.00735689	2.54197e-05	0.0034979	0.0118802	0.00526571	0.00307334	0.00528392	0.00525448	0.00198098	0.00419254	0.00681342	0.00450165	0.00606599	0.00684596	0.0212853	0.0033462	0.00604261	0.00442386	0.00507916	0.00679044	0.00757555	0.00255895	0.00421146	0.00405062	0.00657162	0.0064747	0.00183187	0.00485112	0.00479073	0.00535982
ENSG00000116786	0.00222326	0.00241416	0.00361781	0.00300556	0.00336622	0.00299426	0.00395102	0.00320757	0.00221972	0.00267829	0.00314347	0.00326694	0.0028511	0.00370963	0.00316878	0.00516301	0.00307144	0.00229741	0.00276373	0.00306357	0.00235522	0.00275153	0.00106926	0.00283133	0.00362983	0.00197645	0.00281778	0.0048289	0.00372606	0.00503668	0.00251963	0.00243404	0.00386267	0.00393284	0.00237549	0.00318239	0.00280154	0.00428338	0.0034069	0.0029373	0.00283627	0.00733965	0.00483606	0.00372261	0.00195371	0.0039602	0.00507703	0.00661669	0.00304004
ENSG00000237938	0.0022136	0.00307333	0.00494912	0.00396648	0.00457846	0.00332627	0.00513702	0.00347248	0.00273372	0.00289666	0.00306744	0.00421783	0.00272831	0.00318212	0.00298528	0.00473024	0.00302859	0.00255956	0.00317421	0.00382352	0.00288941	0.00283642	0.00254979	0.00325851	0.0039336	0.00232851	0.0028292	0.00532198	0.00363492	0.00514251	0.00271133	0.00239969	0.00484443	0.0041881	0.00274398	0.00382841	0.00380666	0.00455	0.00459639	0.00402294	0.00405208	0.00642907	0.00514318	0.00359752	0.00230329	0.0043711	0.00584269	0.00731305	0.00290659
ENSG00000162461	0.0258908	0.0284405	0.0616262	0.0626007	0.031031	0.06819	0.0726401	0.106801	0.0965379	0.00999214	0.0818663	0.00106849	0.0219678	0.020087	0.0414023	0.0526248	0.102716	0.0320366	0.0571717	0.0461909	0.0768892	0.050348	0.0686284	0.0201341	0.0637082	0.0842421	0.0143581	0.0225724	0.0712199	0.0786653	0.0664142	0.0750928	0.0753355	0.123346	0.00764977	0.0557082	0.0614428	0.0221251	0.0779582	0.048286	0.0720034	0.0575894	0.0153369	0.109744	0.0792933	0.080778	0.0460802	0.0262013	0.0675566
ENSG00000162458	0.00633041	0.00284662	0.00621939	0.0187556	0.0110126	0.0230506	0.0125341	0.00579821	0.00463592	0.00386408	0.0415159	0.00335433	0.00626418	0.00496974	0.00574506	0.00607372	0.0060968	0.0037627	0.00474864	0.0288826	0.00407391	0.00189419	0.0077065	0.00407213	0.00485051	0.00789932	0.00304784	0.0160941	0.00622139	0.00533759	0.00463847	0.00603324	0.00742489	0.0278994	0.00979785	0.00430419	0.00582333	0.0118085	2.54197e-05	0.00985048	0.0290678	0.0053915	0.00748516	0.00757278	0.00566728	0.00437552	0.00123416	0.00413265	0.00372696
ENSG00000233954	0.893867	0.893867	0.871679	0.893867	0.893867	0.893867	0.893867	0.893867	0.893867	0.893867	0.893867	0.893867	0.893867	0.893867	0.893867	0.893867	0.893867	0.893867	0.893867	0.893867	0.893867	0.893867	0.893867	0.893867	0.893867	0.893867	0.893867	0.893867	0.893867	0.893867	0.893867	0.893867	0.893867	0.893867	0.893867	0.893867	0.893867	0.893867	0.893867	0.893867	0.893867	0.893867	0.893867	0.893867	0.893867	0.893867	0.893867	0.893867	0.893867
ENSG00000179743	0.0281383	0.0365906	0.0245496	2.54197e-05	0.0147243	0.00809072	0.0302536	0.0203803	0.0168385	0.022103	0.0115129	0.0204815	0.0322867	0.00695863	0.00610915	0.0221161	0.0212195	0.0167731	0.0463322	0.0359284	0.0149991	0.0351857	0.0191474	0.0224392	0.0205362	0.0327463	0.0269978	0.0353693	0.0324311	0.0334594	0.0212731	0.0257001	0.0324519	0.0143551	0.0192937	0.0288393	0.00686068	0.0337306	0.011525	0.00514595	0.00710034	0.0227076	0.0153884	0.0243614	0.0314	0.0281206	0.0127505	0.0212319	0.0228447
ENSG00000065526	0.00348515	0.00243914	0.00126708	0.00331422	0.00217794	0.00486003	0.00322925	0.00188038	0.00194013	0.00129465	0.000188809	0.00107025	0.00236942	0.00217413	0.000356329	0.00207303	0.00209252	0.00264599	0.000571061	0.00186859	0.00138108	0.00236581	0.00548523	0.00268901	0.0017674	0.00145098	0.0054704	0.00331635	0.00138622	0.00117935	0.00243517	0.00231077	0.00176036	0.00550235	0.00284966	0.00202555	0.00738014	0.00126306	0.00180742	0.00271061	2.54197e-05	0.0017744	0.00411748	0.00326183	0.00250194	0.00177975	2.54197e-05	0.002493	0.00156662
ENSG00000116809	0.00598292	0.00336962	0.00234164	0.00193123	0.00134055	0.00669706	0.00278596	0.00504979	0.00335847	0.00642309	0.00160892	0.00460452	0.00462314	0.0056111	0.00149316	2.54197e-05	0.00399887	0.00504189	0.00570406	0.00205049	0.00376259	0.00682944	0.00103177	0.00174031	0.00571401	0.0010048	0.00222342	0.00388123	0.00118015	0.00440025	0.00323564	0.00103295	0.00311165	0.00524138	0.000442508	0.00482229	0.0062794	0.00159038	0.00118077	0.000198196	2.54197e-05	0.00149835	0.00673678	0.0032011	0.00300008	0.00411118	0.0028029	0.0033129	2.54197e-05
ENSG00000173641	0.013413	0.00897296	0.0107068	0.0661111	0.107405	0.0746878	0.0158665	0.0168042	0.0124923	0.00888006	0.177794	0.0328513	0.0232994	0.0241599	0.00295285	0.00758273	0.0156958	0.0112327	0.0196252	0.0357238	0.0347249	0.0726094	0.041905	0.0159667	0.0129977	0.12971	0.0119311	0.0496728	0.0282039	0.0144667	0.0225595	0.0247827	0.0911658	0.146296	0.041304	0.0103933	0.0250772	0.0963957	0.0633276	0.0330703	0.0533923	0.0141774	0.0774012	0.0272277	0.0287106	0.236424	0.00736883	0.0206517	0.00768695
ENSG00000186510	0.151908	0.114692	0.199505	0.408379	0.501099	0.628232	0.560059	0.148194	0.136375	0.121347	0.55048	0.0478257	0.148064	0.298908	0.011179	0.189139	0.183421	0.137027	0.194788	0.584243	0.60065	0.543583	0.157007	0.545707	0.10784	0.263141	0.287742	0.22001	0.25835	0.118387	0.10158	0.22255	0.0942898	0.490811	0.366914	0.0992302	0.563417	0.429597	0.555838	0.644401	0.15731	0.412724	0.100082	0.104686	0.101044	0.102911	0.0615894	0.0959476	0.110871
ENSG00000142627	0.00855263	0.00432625	0.00874967	0.00618806	0.0201599	0.0264668	0.0119545	0.0113083	0.00920999	0.0113535	0.0281228	0.0105585	0.00359949	0.000721021	0.00388139	0.00671752	0.00726807	0.00581665	0.00934191	0.0138953	0.020386	0.0197756	0.00944442	0.00427294	0.0117759	0.00538952	0.00999567	0.037678	0.0183523	0.0054167	0.00383099	0.0125157	0.0075538	0.0375953	0.00908572	0.0105016	0.00876299	0.00685838	0.0273351	0.0183155	0.0246717	0.00516447	0.0098497	0.0057851	0.0229628	0.00419849	0.00312032	0.00317831	0.00983746
ENSG00000142632	0.0785905	0.103977	0.0726521	0.0831695	0.133963	0.0843992	0.0582703	0.0749018	0.0899378	0.055212	0.108279	0.0246763	0.0133239	0.0333853	0.0274051	0.0177267	0.0672854	0.091462	0.0605512	0.0595411	0.106244	0.108009	0.111843	0.0526027	0.0789928	0.054607	0.0949141	0.277536	0.0718769	0.0300279	0.0143032	0.0584205	0.0162814	0.152528	0.0264905	0.0961639	0.0604804	0.0764357	0.119527	0.0400267	0.134331	0.010016	0.0578993	0.0550652	0.0890705	0.0422439	0.0131747	0.0294511	0.0408031
ENSG00000237276	0.0644496	0.115203	0.0704695	0.0574506	0.035447	0.0523011	0.0545877	0.0826955	0.11896	0.0878086	0.0381724	0.0482594	0.0155064	0.017536	0.00689569	0.00701134	0.0361372	0.0650768	0.106075	0.0421507	0.0458157	0.0456171	0.0538254	0.0358288	0.0699823	0.0757311	0.0833528	0.0235131	0.0679174	0.0328376	0.0289124	0.0470515	0.00723142	0.311647	0.0175113	0.093176	0.0433194	0.0400172	0.0455895	0.0156403	0.0759982	0.0239284	0.0207309	0.00764001	0.0415712	0.0463147	0.121338	0.0339592	0.0572133
ENSG00000037637	0.00740381	0.00393443	0.00197557	0.0135794	0.00819256	0.0108349	0.00763689	0.00427594	0.00349388	0.00487543	0.00126243	0.0030584	0.00291239	0.00285224	0.00463521	0.00627756	0.00566733	0.00444941	0.00563637	0.0147142	0.0121163	0.00720487	0.0072045	0.00262968	0.00210291	0.00379673	0.00550017	0.00981352	0.00485139	0.00395778	0.00346882	0.00369766	0.00400873	0.00966869	0.00187328	0.00437189	0.012554	0.00821924	0.0141789	0.0143226	0.0110129	0.00269261	0.00504452	0.00397728	0.00677254	0.00843872	0.00253954	0.0049919	0.0046091
ENSG00000055070	0.00255786	0.00143891	2.54197e-05	0.0012185	0.00290936	0.00401248	0.00200528	0.00215786	0.00265197	0.00214114	0.00258183	0.00362579	0.00252882	0.00143546	0.00634519	0.00221929	0.00177314	0.00203873	0.00118075	0.00259377	0.00394136	0.00482102	0.00137786	0.00143473	0.0024957	0.00141697	0.00172997	0.00159925	0.00344444	0.0024809	0.00306918	0.0020704	0.00226828	0.00209072	0.00293187	0.00236568	0.00258667	0.00394237	0.00246405	0.0027676	0.00192641	0.00249799	0.00164796	0.00176052	0.00207475	0.00204534	0.00264723	0.00113393	0.00148491
ENSG00000187144	0.00256269	0.00151223	2.54197e-05	0.00146746	0.00375284	0.00369999	0.00216442	0.0020785	0.00268618	0.00215018	0.0025834	0.00341582	0.0026578	0.0014224	0.00301145	0.0021828	0.00174656	0.00213032	0.00123423	0.00258394	0.00380992	0.00515473	0.00148457	0.00149513	0.00254527	0.00141576	0.00177728	0.00182519	0.00355401	0.00257848	0.00307724	0.00202467	0.00227435	0.00210522	0.00303102	0.00233626	0.00274972	0.00389284	0.00213926	0.00291172	0.00203454	0.00256257	0.00170387	0.00185264	0.0020599	0.00199214	0.0026123	0.00114058	0.00146455
ENSG00000157191	0.00909271	0.00704054	0.0154475	0.0148394	0.00982509	0.020764	0.0101333	0.00837439	0.0128429	0.0065609	0.010987	0.0188594	0.00964775	0.00864688	0.01119	0.0130106	0.00606363	0.00866038	0.011875	0.0162904	0.0136198	0.0160809	0.0224252	0.00864431	0.00920164	0.0162933	0.0139738	0.0111289	0.00680737	0.00996924	0.00668397	0.0141851	0.00772445	0.0215146	0.00461434	0.00966339	0.0148614	0.0115497	0.0147243	0.0141966	0.0208943	0.0142135	2.54197e-05	0.0106315	0.00760513	0.0172591	0.00196091	0.0147813	0.00406168
ENSG00000080947	0.0106374	0.00456515	0.00414804	0.00668536	0.00452292	0.00503641	0.0034904	0.0043624	0.0059155	0.00793196	0.0365041	0.00967161	0.0132454	0.00846602	0.00601411	0.00426285	0.00858519	0.00683501	0.00986113	0.00315481	0.00355587	0.00495847	0.00740613	0.00672093	0.00539833	0.00677867	0.00738631	0.028226	0.00757326	0.0106079	0.0144923	0.00791724	0.0108016	0.0362109	0.00657614	0.00769858	0.00302769	0.0034981	0.00499638	0.00447764	0.00459186	0.00654302	0.0112494	0.01239	0.00512572	0.00268927	0.00364874	0.0205165	0.0043628
ENSG00000219481	0.370811	0.286524	0.29399	0.348656	0.312161	0.175469	0.220909	0.328635	0.243088	0.347241	0.697174	0.349567	0.340145	0.345519	0.363362	0.335416	0.366098	0.326087	0.388496	0.161962	0.344646	0.221644	0.268289	0.378967	0.256495	0.277293	0.375862	0.367328	0.270394	0.429363	0.363847	0.305916	0.221291	0.640394	0.464684	0.333637	0.263086	0.287897	0.295518	0.299709	0.237243	0.246781	0.473987	0.352992	0.320388	0.137762	0.313883	0.291543	0.299585
ENSG00000058453	0.0383801	0.0368254	0.0169157	0.0174509	0.0373281	0.027805	0.0306759	0.0306025	0.0326838	0.0368397	0.119593	0.0294866	0.0428347	0.0593189	0.0227135	0.0630429	0.0315229	0.0241087	0.049008	0.0217148	0.0140945	0.0291583	0.0438618	0.0274512	0.0366868	0.0719707	0.0362873	0.0564591	0.0350246	0.0295726	0.0406674	0.0395209	0.0495487	0.0706981	0.0431907	0.0425505	0.0208271	0.0316486	0.02674	0.0188998	0.0359306	0.0484787	0.0442667	0.0435613	0.0527355	0.0204962	0.0395097	0.073322	0.0484678
ENSG00000186715	0.893867	0.854042	0.860814	1.05817	0.893867	1.11886	1.07671	0.512816	0.893867	1.07719	1.65769	0.518356	0.893867	0.631171	0.893867	0.893867	0.893867	0.924379	0.893867	1.05918	1.03969	1.04574	1.00045	0.696673	0.893867	1.07094	1.23423	0.893867	0.893867	0.893867	0.893867	0.893867	0.893867	1.59384	0.893867	1.11998	1.09585	0.893867	1.0601	1.07761	0.917485	0.893867	0.535279	0.637751	0.900225	0.893867	0.893867	0.394912	0.845136
ENSG00000238142	0.496	0.658806	0.590612	0.526905	0.768958	0.570351	0.485774	0.81587	0.568392	0.65668	1.52558	0.893867	0.757988	0.597632	0.429538	0.747243	0.651013	0.596354	0.448319	0.508725	0.719996	0.614656	0.457727	0.593828	0.624774	0.893867	0.605136	0.661618	0.536926	0.548834	0.747019	0.490834	0.509087	0.348497	0.893867	0.796203	0.647584	0.734242	0.585382	0.494288	0.419691	0.528081	0.893867	0.530301	0.893867	0.619403	0.530789	0.870518	0.893867
ENSG00000117122	0.0197214	0.0184516	0.0223909	0.092791	0.116608	0.0984488	0.0913606	0.0494632	0.0329961	0.0347985	0.548771	0.061594	0.0103108	0.0244679	0.0166314	0.0138049	0.0381608	0.0313475	0.023733	0.0902307	0.118169	0.0821938	0.115445	0.0167609	0.0391229	0.168513	0.0791871	0.073496	0.0321714	0.0135042	0.00989215	0.104947	0.0288633	0.198226	0.0663635	0.06552	0.0957572	0.111101	0.111244	0.0935143	0.111186	0.0248721	0.0684201	0.0589969	0.0425536	0.0283264	0.00659942	0.0166278	0.0225609
ENSG00000226526	0.00481253	0.00359755	2.54197e-05	0.000426575	0.00116551	0.00111884	0.000206345	0.00365669	0.00464825	0.003507	0.0261751	0.0025248	0.00125505	0.00196238	0.00196705	0.0107986	0.00168077	0.00194569	0.00296051	0.000815072	0.000377992	0.00102353	0.000485352	0.00161767	0.00436854	0.00377899	0.00309609	0.0198576	0.00257506	0.00208819	0.00303939	0.00391391	0.002425	0.00339574	0.000834646	0.00417502	0.000507124	0.000776548	0.000491618	0.000507517	0.000372081	0.026845	0.00185413	0.00155346	0.00487282	0.00237372	0.00082825	0.00275142	0.00291871
ENSG00000159363	0.00469644	0.00371852	2.54197e-05	0.00042609	0.00117714	0.00110753	0.000208964	0.0037244	0.0047829	0.0031596	0.0260078	0.00251991	0.00117427	0.00183744	0.0018639	0.0113682	0.00178181	0.00196937	0.00303046	0.000817257	0.00038148	0.00101726	0.000475409	0.00148252	0.00403885	0.00345274	0.00317663	0.020077	0.00250393	0.00210045	0.002909	0.00396168	0.00243063	0.00343507	0.000843699	0.00440014	0.00051197	0.000764468	0.000495513	0.000511829	0.000380667	0.0268278	0.0018728	0.00164357	0.0043266	0.00236423	0.000773764	0.00257989	0.00279347
ENSG00000117118	0.00460553	0.0064462	2.54197e-05	0.00867913	0.00122352	0.00161676	0.0124417	0.000886699	0.00177704	0.00771788	0.00233755	0.00727028	0.00491879	0.000870795	0.0026258	0.00225488	0.00269846	0.00168139	0.00718923	0.000664834	0.00405314	0.0109626	0.00490952	0.00422796	0.00267304	0.00500204	0.00409604	0.00924202	0.00993923	0.004752	0.00529587	0.00235686	0.00493336	0.0182228	0.00624144	0.00452459	0.00345729	0.000885965	0.00379409	0.00841108	0.0119469	0.00268328	2.54197e-05	0.00666422	0.00427356	0.0141878	0.00521426	0.00218897	2.54197e-05
ENSG00000117115	0.0463993	0.11904	0.0182035	0.00440554	0.00357397	0.00691446	0.0114226	0.0242797	0.0154656	0.124293	0.178823	0.0429099	0.00960463	0.0131672	0.0102179	0.0416961	0.0774034	0.127359	0.0166206	0.00772757	0.0184189	0.0053611	0.00272476	0.00995286	0.0294235	0.115239	0.162392	0.16485	0.0172033	0.0388928	0.0171415	0.129224	0.092312	0.149386	0.0493696	0.0793929	0.0196146	0.00351658	0.0207985	0.00848573	0.00354669	0.0420706	0.0640613	0.115037	0.0566547	0.0295064	0.0060461	0.122343	0.0593396
ENSG00000159339	0.227497	0.208908	0.176271	0.204578	0.353518	0.249093	0.223657	0.251829	0.219214	0.12733	0.320488	0.290872	0.32113	0.227588	0.20743	0.203901	0.141177	0.217064	0.246535	0.229264	0.150107	0.241834	0.231694	0.242859	0.248194	0.777396	0.241617	0.116913	0.325334	0.285555	0.366111	0.118844	0.213979	0.0343966	0.226498	0.280424	0.157929	0.333396	0.169076	0.257761	0.245487	0.266476	0.196164	0.126707	0.261676	0.250217	0.231202	0.174249	0.191464
ENSG00000179051	0.00442838	0.0044988	0.00623981	0.00201985	0.0016255	0.00417129	0.00777833	0.00417958	0.00241251	0.00556231	0.00249482	0.00283164	0.00347233	0.00120913	0.0027262	0.00467685	0.0042625	0.00556208	0.00297602	0.00666693	0.00343132	0.00470127	0.0057081	0.00224483	0.00274446	0.00285112	0.00480065	0.00452024	0.00297071	0.00423573	0.00338471	0.0023477	0.00244612	0.00613506	0.00334897	0.00618306	0.00334854	0.00218257	0.00455823	0.0023377	0.00433964	0.00747494	0.00482214	0.00278184	0.00185762	0.00580923	0.00280497	0.00268679	0.00455693
ENSG00000074964	0.00209676	0.00437626	2.54197e-05	0.00139045	0.00493987	0.00100597	0.00296778	0.00152881	0.00371704	0.00207306	0.133343	0.00251869	0.00190219	0.0025443	0.00148253	0.002369	0.00191154	0.00414369	0.00153697	0.00171848	0.00311994	0.0018808	0.00172401	0.00111332	0.00268231	0.00226722	0.00172645	0.00208879	0.00219991	0.00274843	0.00214379	0.00372368	0.00480877	0.00793993	0.00383253	0.00413355	0.000880347	0.00435747	0.00338247	0.000635669	0.0026924	0.00252461	0.00329684	0.00270131	0.00252088	0.00212255	0.00101875	0.00267668	0.00142152
ENSG00000117154	0.026809	0.0118073	0.0353417	0.00570327	0.00728063	0.00768169	0.00834289	0.0433763	0.0312235	0.0138368	0.104212	0.068411	0.124014	0.0805241	0.00545615	0.0116713	0.0334552	0.0108983	0.136975	0.00503239	0.00443574	0.00505304	0.010192	0.0611626	0.0549925	0.143748	0.031589	0.0690665	0.011494	0.0479883	0.0755528	0.00991841	0.0373875	0.114343	0.00422729	0.0136719	0.00404396	0.00670814	0.00370019	0.00812724	0.00472011	0.105119	0.0608246	0.0178042	0.0643347	0.012277	0.104945	0.0790587	0.0319208
ENSG00000179023	0.893867	1.19441	0.42922	0.754606	0.329695	0.813029	0.755524	1.06441	0.9845	1.20839	2.46711	0.0679594	0.958197	0.567122	0.523814	0.430772	1.01374	1.09966	0.893867	0.756899	0.881082	0.716002	0.705126	0.51775	0.85055	2.18125	1.05748	0.0668692	1.03409	0.478924	0.824808	1.69021	0.0792695	2.05354	1.33917	2.04969	0.797807	0.388966	0.804613	0.777807	0.773678	0.489543	0.075844	0.141352	1.88366	0.660589	0.132322	0.0674348	1.02057
ENSG00000159423	0.00399765	0.00959404	0.00656318	0.0225848	0.00259572	0.0141458	0.0157335	0.00322357	0.00346734	0.0178661	0.0133554	0.00574056	0.00648521	0.0044634	0.00309716	0.00368511	0.00429713	0.00698185	0.00390337	0.0146637	0.0173053	0.0109492	0.0167696	0.00573632	0.00298759	0.00733043	0.0152259	0.0025132	0.00670311	0.00387594	0.00748614	0.013045	0.0065625	0.017766	0.00578641	0.00643426	0.0184104	0.00445318	0.017433	0.0170629	0.0137937	0.0044974	0.0079194	0.00367395	0.00386817	0.00269124	0.00820557	0.00420776	0.00313563
ENSG00000169991	0.0192145	0.0100343	0.0375573	0.00193917	0.00448201	0.0102427	0.0043426	0.0103763	0.0136272	0.0150058	0.0203168	0.0116712	0.00557153	0.00998695	0.00522809	0.00782582	0.0257635	0.0241154	0.0145987	0.0132126	0.00555557	0.0169065	0.00199736	0.0135616	0.0157934	0.0112392	0.020157	0.028243	0.0170556	0.00929978	0.00418122	0.0108799	0.0160699	0.038491	0.0106509	0.011529	0.00149961	0.00761096	0.00966557	0.0188933	0.0121069	0.00464482	0.0135323	0.0177335	0.0131095	0.0179271	0.0117807	0.0160106	0.0138154
ENSG00000272084	0.0584273	0.0294227	0.0428545	0.0360586	0.0327574	0.0196812	0.0856335	0.0149527	0.0324248	0.0327277	0.0641151	0.0496111	0.0429578	0.0320274	0.00762571	0.0424422	0.0590708	0.0416838	0.0393116	0.0573379	0.0581106	0.00150425	0.0343711	0.0380164	0.0231033	0.0577221	0.0330651	0.0266823	0.0421656	0.0263163	0.0546396	0.0230355	0.0437937	0.067804	0.0430825	0.0429375	2.54197e-05	0.0175208	0.0426069	0.0300471	0.0289158	0.03646	0.03479	0.0401935	0.0365327	0.0129688	0.0434244	0.0380637	0.0148816
ENSG00000127481	0.00312811	0.00361808	0.0163029	0.00186179	0.000858976	0.00162718	0.00158284	0.00386596	0.00654128	0.00158028	0.00194038	0.00188319	0.00508376	0.00372009	0.00587669	0.00258432	0.00304018	0.0034355	0.00364042	0.000803903	0.00240983	0.00246601	0.00288324	0.00278159	0.00642579	0.0016893	0.00182357	0.00293809	0.0019628	0.00504401	0.00592703	0.00300968	0.00286426	0.00282282	0.00637956	0.00272491	0.00128287	0.000708021	0.00250376	0.000844005	0.00257095	0.00242415	0.00401195	0.00192395	0.00319689	0.00210857	0.00283107	0.00334988	0.00447162
ENSG00000230424	0.0239077	0.0176733	0.00679264	0.0203628	0.0121149	0.0214548	0.00970698	0.0124051	0.0156463	0.00944112	0.0141064	0.0193218	0.0174524	0.0165518	0.00941722	0.0132423	0.0131331	0.0184227	0.017518	0.0204606	0.00955269	0.0159736	0.0129727	0.011287	0.0123815	0.0193867	0.011474	0.0339122	0.0224987	0.0101836	0.0225418	0.0132826	0.0112055	0.0371475	0.0220951	0.0286248	0.0191919	0.00774586	0.0202164	0.0173901	0.0189154	0.0147694	0.0170246	0.0162175	0.0125432	0.0159861	0.0184691	0.016368	0.0132536
ENSG00000127463	0.0194391	0.0128803	0.00144732	0.0184582	0.0120969	0.0237703	0.00878695	0.0138543	0.0152304	0.00715944	0.00700088	0.0130508	0.0151838	0.0106523	0.00897955	0.00775522	0.0100603	0.0175266	0.0119565	0.0119901	0.0129376	0.0109628	0.00421774	0.00863468	0.0122024	0.0147099	0.0106935	0.0344192	0.0196835	0.0126095	0.0184694	0.00872875	0.0106549	0.0231155	0.0161035	0.0249056	0.0152854	0.00834821	0.0147701	0.0205308	0.00758506	0.011614	0.020387	0.0140744	0.00694746	0.0167969	0.0106377	0.0137732	0.014269
ENSG00000053372	0.0184595	0.0201811	0.0143122	0.0242998	0.0188362	0.0270863	0.0343898	0.0158488	0.0192146	0.018419	0.0188805	0.0262169	0.0178699	0.0217989	0.0188038	0.0112641	0.0167567	0.0223394	0.0167059	0.0271853	0.0317393	0.0303428	0.0329953	0.0194962	0.0204127	0.0143206	0.0243411	0.0459681	0.0173779	0.0162985	0.0191207	0.0206374	0.014065	0.038287	0.0167373	0.0237475	0.0307709	0.0266355	0.0276617	0.0222205	0.0336879	0.0161003	0.0189601	0.0164185	0.0152253	0.0201667	0.0147559	0.0242891	0.0188624
ENSG00000211454	0.0880671	0.0828481	0.0417997	0.0545217	0.0150487	0.0148614	0.0232285	0.0257592	0.0872782	0.119576	0.0886737	0.1329	0.0385507	0.0114647	0.03167	0.0665995	0.0990627	0.0817718	0.058272	0.0279128	0.0381743	0.034313	0.0353678	0.0147814	0.0829099	0.0757907	0.110826	0.00962451	0.0805831	0.0705679	0.056885	0.0710491	0.0848268	0.151177	0.0475238	0.0831312	0.00459	0.0156173	0.0367451	0.0131608	0.0282724	0.0662539	0.0482487	0.0988144	0.0562199	0.0281516	0.0570766	0.0136218	0.064684
ENSG00000162482	0.0657892	0.067705	0.0583254	0.0149574	0.021595	0.0236929	0.0103547	0.0653506	0.0932082	0.0834727	0.0783191	0.776006	0.0414751	0.0114308	0.00752668	0.0520205	0.0352649	0.0681054	0.0767625	0.0219866	0.0161681	0.0317103	0.0411234	0.0216113	0.0507938	0.0604024	0.0919636	0.0511075	0.0805027	0.058496	0.0416392	0.0539357	0.0625041	0.085062	0.0155623	0.0840432	0.0186513	0.0287871	0.00936003	0.0138823	0.0569763	0.0340707	0.0248072	0.149444	0.0434168	0.0318385	0.0521321	0.0414399	0.0326872
ENSG00000053371	0.0545657	0.0339101	0.0401062	0.0517534	0.0462852	0.0340803	0.0467476	0.0262146	0.031145	0.0273024	0.0165874	0.00822953	0.0379165	0.0209915	0.0289796	0.0150954	0.0426321	0.0307361	0.0522564	0.0546443	0.0403505	0.0319779	0.0548022	0.0186825	0.0406013	0.0244559	0.0446723	0.0111667	0.0465757	0.0588256	0.0488081	0.0342338	0.0269877	0.0568901	0.0276815	0.0561857	0.0465035	0.0482317	0.0565413	0.0395664	0.0383318	0.0305881	0.0283496	0.0257643	0.0213806	0.0231136	0.0245605	0.0209375	0.0437922
ENSG00000040487	0.00531898	0.00537232	0.0322427	0.00838357	0.00641611	0.0146575	0.00449197	0.00879576	0.0038199	0.00734113	0.00362484	0.00908616	0.00908407	0.00457748	0.00194698	0.00906985	0.0104006	0.00383527	0.0074993	0.00169322	0.0103727	0.00833675	0.00349347	0.00353948	0.00762815	0.00320853	0.00589795	0.0061972	0.00716376	0.0121097	0.00444679	0.0112952	0.00963364	0.0198225	0.00605834	0.0101981	0.00790998	0.00424046	0.00368616	0.00339979	0.0046481	0.00478996	0.00103692	0.00559002	0.00652134	0.0063877	0.00223674	0.00210997	0.00768429
ENSG00000077549	0.00263657	0.00609182	0.00180061	0.00352906	0.00226279	0.0066318	0.00497543	0.00562297	0.00606313	0.00312393	0.00305554	0.00307838	0.0029772	0.00468097	0.00262701	0.00364078	0.00278307	0.00362853	0.00282264	0.00354104	0.00232671	0.00261174	0.00539129	0.00540465	0.00692341	0.00182066	0.0051231	0.00570259	0.00286343	0.00510863	0.00250064	0.00212749	0.00361344	0.00262391	0.00495712	0.00747907	0.00246049	0.00285098	0.00166077	0.00327332	0.00124926	0.00361014	0.00201696	0.00206469	0.00257966	0.0013273	0.00199057	0.00628218	0.00591289
ENSG00000173436	0.00391668	0.00470091	0.00671715	0.000972801	0.00212247	0.00133143	0.00165204	0.00302196	0.00392648	0.00467712	0.00357052	0.00200057	0.00397276	0.00261419	0.00451301	0.00308311	0.00436402	0.0036302	0.00208072	0.00368179	0.00242484	0.00158128	0.00474814	0.00426577	0.00284456	0.00409546	0.00536135	0.00815311	0.00318472	0.00517191	0.00744528	0.00278467	0.00496911	0.00624557	0.00454873	0.00302114	0.00366605	0.00246784	0.00199603	0.00187434	0.000417852	0.00415443	0.00317247	0.00320062	0.0017161	0.00192455	2.54197e-05	0.00421589	0.00409759
ENSG00000226396	0.189648	0.0772143	0.0421512	0.0446636	0.0114131	0.043485	0.0205764	0.0451698	0.0244074	0.0286753	0.226213	0.332849	0.154917	0.0427323	0.0123809	0.0483323	0.0693372	0.0568782	0.106261	0.0396562	0.0408734	0.0364923	0.111899	0.0290705	0.0207465	0.218397	0.014325	0.104743	0.0975928	0.0157913	0.267037	0.0267917	0.0390638	0.110593	0.0646817	0.229636	0.0276273	2.54197e-05	0.0195005	0.0435897	0.0914815	0.0975661	2.54197e-05	0.0541548	0.0135494	0.00997861	0.0246692	0.0806083	0.039275
ENSG00000158747	0.00726933	0.0125186	0.00755299	0.011237	0.0225599	0.0127319	0.0102701	0.014577	0.00940069	0.0078712	0.0909278	0.0103889	0.00895297	0.018746	0.00717021	0.00842548	0.0107765	0.0141964	0.00985751	0.00916593	0.0102317	0.00548089	0.0118118	0.00958932	0.0130007	0.0162769	0.00567764	0.0249451	0.00899246	0.0133415	0.00962137	0.0319643	0.0195995	0.0685437	0.0172669	0.0136476	0.0126671	0.0200176	0.0128427	0.015727	0.00852914	0.00634584	0.018255	0.0113917	0.0128519	0.0109034	0.0109533	0.0146396	0.00846362
ENSG00000162542	0.0077371	0.00608343	0.002939	0.021538	0.0208989	0.0111909	0.0126537	0.00888736	0.00553635	0.0112134	0.012028	0.007683	0.00887939	0.0104688	0.00471023	0.00381061	0.00830755	0.00910104	0.00740024	0.0133912	0.00714892	0.0145794	0.0205365	0.00411158	0.00874612	0.00684127	0.0136176	0.0128194	0.0131101	0.00389758	0.0100289	0.0160746	0.00699733	0.0201937	0.0127129	0.0119332	0.015252	0.0197485	0.00745054	0.0198808	0.0126606	0.00680285	0.0166059	0.0102621	0.00943029	0.0122926	0.00540051	0.00674279	0.0086811
ENSG00000169914	0.0194241	0.021142	0.0246866	0.0272182	0.0212782	0.0464197	0.0252195	0.0150898	0.0156372	0.025616	0.014625	0.0143034	0.0124296	0.00497172	0.00190364	0.0162551	0.019465	0.0290478	0.0140068	0.031484	0.0228515	0.0327813	0.0328189	0.00816489	0.0151039	0.0118457	0.0197298	0.0326884	0.0224148	0.0140546	0.0142505	0.0110172	0.0218261	0.0282471	0.02033	0.0206566	0.0287306	0.0173314	0.0260193	0.0302221	0.0588988	0.0122187	0.0133105	0.0125365	0.0264812	0.0169856	0.00532466	0.0103768	0.0248204
ENSG00000188257	0.159211	0.0583108	0.081355	0.228139	0.289762	0.248073	0.242257	0.0618498	0.0519128	0.13042	0.359644	0.125557	0.0908512	0.0104788	0.0218079	0.0643187	0.105948	0.19679	0.119403	0.248584	0.2799	0.226687	0.318736	0.0580544	0.086002	0.267693	0.0847614	0.893867	0.0489966	0.0830909	0.076772	0.432935	0.0749006	0.318654	0.0325822	0.126675	0.222019	0.265807	0.238259	0.25416	0.292421	0.0480081	0.353983	0.0625774	0.0738639	0.0786943	0.147262	0.0930432	0.0348518
ENSG00000127472	0.114426	0.106386	0.0745643	0.0779626	0.0527734	0.0517951	0.0221578	0.0512028	0.0481366	0.0192334	0.249757	0.137369	0.102328	0.0479274	0.00979469	0.145322	0.0751161	0.0705437	0.164265	0.027673	0.0356466	0.101557	0.0311211	0.0734102	0.0287707	0.235182	0.0151179	0.114498	0.189398	0.0328258	0.0768101	0.139668	0.107049	0.376148	0.0629931	0.220719	0.0590702	0.0631862	0.0504625	0.0525285	0.0621334	0.0299038	0.185576	0.0554781	0.138971	0.111816	0.0950011	0.0418016	0.0837968
ENSG00000162545	0.0158813	0.00778084	0.00330033	0.00145931	0.0284171	0.0011387	0.00152947	0.00324598	0.00466013	0.0112174	0.18912	0.0290019	0.0101845	0.00669215	0.0209113	0.0149501	0.0224742	0.0027419	0.00135593	0.0027201	0.000909059	0.00189727	0.00598311	0.00217109	0.00552441	0.014691	0.00515192	0.0106447	0.019718	0.00910635	0.00626777	0.195655	0.0152742	0.121515	0.00864009	0.010658	0.00108828	0.0265584	0.00271064	0.00104588	0.0069534	0.012693	0.00147157	0.00921043	0.00331567	0.00479489	0.00916677	0.0166895	0.00724783
ENSG00000090432	0.0134154	0.0147106	0.00418048	0.0116905	0.00756616	0.0129617	0.0134531	0.00997951	0.0116226	0.0101208	0.00814506	0.0126129	0.00758394	0.00926679	0.0051777	0.0109942	0.0119048	0.0107213	0.0113403	0.0175679	0.0129808	0.0164911	0.0193365	0.0103697	0.0120435	0.01291	0.00861607	0.0104225	0.0122838	0.0108855	0.00856322	0.00952781	0.0107523	0.0161225	0.00702443	0.0110985	0.0189173	0.00634468	0.0164956	0.0133798	0.00938009	0.00973102	0.00701032	0.0156428	0.00890939	0.0126401	0.00929039	0.0119753	0.011475
ENSG00000158825	0.184171	0.0502145	0.0797663	0.0972003	0.102337	0.0498833	0.114852	0.0646421	0.0512565	0.112329	0.270087	0.150259	0.0531585	0.138939	0.0427571	0.0188678	0.0896365	0.0789091	0.186688	0.130286	0.0943787	0.0737635	0.0711543	0.112016	0.0386251	0.145101	0.0797218	0.0118813	0.0893788	0.0355411	0.0637389	0.0192529	0.0888354	0.0143774	0.041002	0.0967613	0.088341	0.0436285	0.10018	0.10447	0.119053	0.0151153	0.0730667	0.0318019	0.0260985	0.107934	0.0375803	0.0311546	0.0281961
ENSG00000158828	0.00588495	0.00505876	0.00409863	0.00571311	0.00867177	0.00690433	0.00596363	0.00404542	0.00426196	0.00585618	0.0289615	0.00758383	0.00504796	0.00150796	0.00339156	0.00392259	0.0117887	0.00499654	0.0108556	0.00469341	0.00580243	0.00494543	0.00448187	0.00374307	0.00456524	0.00824733	0.0064795	0.0106991	0.00706039	0.0114735	0.00675849	0.0189632	0.00862278	0.00943891	0.00940717	0.00945649	0.00415191	0.00926683	0.00443176	0.00425793	0.0105323	0.0057989	0.00888365	0.00997573	0.00764995	0.0103898	0.00747369	0.00683125	0.00903321
ENSG00000117242	0.00197314	0.00187031	0.00235314	0.00282605	0.00265646	0.00360844	0.0028009	0.00212998	0.00198381	0.00400164	0.0141683	0.00648239	0.00218463	0.0022253	0.000898137	0.00275811	0.00305965	0.0019807	0.00249349	0.00401528	0.00209441	0.00270002	0.00129028	0.00163147	0.00187294	0.00388123	0.0061415	0.0139315	0.00108565	0.00420707	0.00333308	0.00381458	0.00277853	0.00446848	0.0106217	0.00177747	0.00394454	0.00128766	0.00437055	0.00318357	0.00162138	0.00302083	0.00165361	0.00249546	0.0027498	0.00375431	0.00238012	0.00283604	0.00278029
ENSG00000244038	0.00627147	0.00691874	0.00352398	0.00513248	0.00732388	0.00496945	0.00579293	0.00664202	0.00604935	0.00624383	0.00541281	0.00594315	0.00444481	0.00506683	0.00538699	0.00525753	0.0070128	0.00602038	0.00538434	0.00522141	0.00455873	0.00892362	0.00391096	0.00380962	0.00470092	0.00942667	0.00756067	0.0057751	0.00557574	0.00431081	0.00574963	0.00358745	0.00529024	0.0082131	0.00551212	0.00669299	0.00742778	0.00575482	0.00936568	0.00545853	0.0071132	0.00435823	0.00524562	0.0057663	0.00597629	0.00499367	0.0034963	0.00644349	0.00477998
ENSG00000117245	0.0207794	0.0446613	0.0319359	0.0203743	0.0312973	0.0142503	0.014083	0.05488	0.0471155	0.0254252	0.12212	0.0367839	0.0329456	0.114506	0.00732829	0.0313361	0.016992	0.0266604	0.0165036	0.0104753	0.0189316	0.0105598	0.0336243	0.0260997	0.0385931	0.0682642	0.0165362	0.0266723	0.0406574	0.0357182	0.0460945	0.0039558	0.0220996	0.0447557	0.0343308	0.0439426	0.0155759	0.031612	0.0149628	0.00912978	0.0209951	0.0380645	0.0249416	0.0109948	0.0789294	0.0201755	0.0287841	0.0480085	0.03055
ENSG00000127483	0.00311383	0.00130049	0.00286519	0.00131563	0.00820718	0.00107426	0.00272133	0.002832	0.00257055	0.00547673	0.00378983	0.0034629	0.00323795	0.004342	0.000672438	0.000337327	0.00122138	0.00548744	0.00624692	0.000824895	0.00505812	0.00503858	0.00767517	0.00144169	0.00267767	0.00576873	0.00969675	0.00489787	0.00373234	0.00433916	0.00652829	0.00275217	0.00321347	0.0169575	0.00101541	0.00205031	0.00272791	0.00124862	0.000301529	0.00129075	0.00316234	0.00376252	0.00585976	0.00360876	0.00285002	0.00405039	0.00350238	0.00344765	0.00428356
ENSG00000075151	0.00286244	0.0036619	0.00479057	0.0150442	0.00737564	0.00165132	0.00657595	0.00290368	0.00932401	0.00683521	0.0045423	0.00986182	0.0178863	0.0056864	0.00214287	0.00473932	0.00588345	0.016266	0.00600495	0.00242247	0.00854859	0.000501009	0.00739108	0.00595868	0.00493336	0.00329248	0.00525287	0.00238468	0.00848041	0.0122244	0.0221204	0.00209483	0.00816873	0.0122732	0.00288367	0.00894454	0.0236895	0.00887339	0.00296962	0.0143942	0.0117809	0.00905633	0.00357466	0.0170352	0.0125973	0.00291352	0.00984634	2.54197e-05	0.0109446
ENSG00000117298	0.0028989	0.00339231	0.0021411	0.00533631	0.00713224	0.00613368	0.00420899	0.00370573	0.00245226	0.00406336	0.0187628	0.00269398	0.00514286	0.00350746	0.0017736	0.00313899	0.00291592	0.00320619	0.00362428	0.00325007	0.00394002	0.00513157	0.00553165	0.00380775	0.00363533	0.00465507	0.00497362	0.00362412	0.00308412	0.00335095	0.00620961	0.00398932	0.00365513	0.0112589	0.00336814	0.00382738	0.00445236	0.00512764	0.00314966	0.00121749	0.00385149	0.0038123	0.0022574	0.00380085	0.00289202	0.00249315	0.00505058	0.001992	0.00368677
ENSG00000142794	0.223802	0.221606	0.0432835	0.0144149	0.0283574	0.064066	0.0450196	0.0527045	0.024848	0.037534	0.893867	0.0133403	0.0745807	0.0514417	0.016718	0.0707911	0.143843	0.340686	0.11366	0.019212	0.0169872	0.0286495	0.0283149	0.0497894	0.0303295	0.0326374	0.080619	0.308845	0.169461	0.029664	0.104358	0.117735	0.0265968	0.243204	0.0297488	0.489505	0.0310031	0.0272498	0.0217334	0.0106383	0.124187	0.105649	0.0773791	0.252032	0.0070951	0.00852865	0.0448413	0.0364547	0.0366096
ENSG00000162551	0.0208459	0.0192868	0.0119084	0.0171819	0.0132872	0.0155387	0.0197588	0.0399532	0.0336666	0.0110929	0.192302	0.0195058	0.041054	0.0234265	0.00296279	0.0159525	0.0151742	0.0162857	0.0189395	0.0159917	0.0115797	0.0186479	0.0229484	0.0145476	0.0375358	0.239578	0.017644	0.00769683	0.0252784	0.024875	0.0590639	0.00350685	0.0293005	0.00484119	0.0093493	0.0256438	0.0123421	0.0217702	0.0151258	0.0169681	0.033431	0.00981222	0.0124614	0.00358513	0.0509998	0.0180663	0.0300456	0.0180754	0.0394721
ENSG00000076864	0.0756222	0.0375338	0.0209078	0.00522017	0.00450393	0.00679504	0.00279027	0.0104414	0.0365946	0.00855997	0.102864	0.00585888	0.0266895	0.0210533	0.0048956	0.0499537	0.037302	0.0351054	0.013738	0.00280819	0.00220288	0.00210855	0.00413481	0.0474479	0.0309657	0.069204	0.0317357	0.0114825	0.0145744	0.0154789	0.0314763	0.0896221	0.00608739	0.329455	0.00232739	0.0406967	0.00155084	0.00596605	0.00249669	0.0029126	0.00469794	0.0499164	0.00396319	0.00788277	0.041559	0.00347695	0.013241	0.00124886	0.0696925
ENSG00000090686	0.00584863	0.00721034	0.00707829	0.0477309	0.0177777	0.0422516	0.0502296	0.016959	0.0134236	0.009254	0.0197542	0.00876548	0.0064972	0.00831125	0.00769523	0.010792	0.00825008	0.00745859	0.00611375	0.0437271	0.0168877	0.0519926	0.0315569	0.00991	0.0126239	0.00530185	0.0123978	0.0214556	0.0111409	0.0134428	0.0100787	0.016126	0.0173308	0.0158762	0.016515	0.00789442	0.0335602	0.01211	0.0346002	0.0354092	0.0206166	0.0103865	0.012294	0.00748097	0.0116045	0.0129026	0.00474271	0.0077729	0.00928515
ENSG00000187942	0.00668587	0.00359483	0.00301139	0.0169143	0.0305386	0.0237995	0.0213545	0.00461859	0.00413448	0.00456993	0.284177	0.00595733	0.00632913	0.00468737	0.00685516	0.0045411	0.00563838	0.0038452	0.00753191	0.015785	0.022721	0.0131057	0.013511	0.00343934	0.00421862	0.00352349	0.00310522	0.0039301	0.00576819	0.00533802	0.00629775	0.00435122	0.00668817	0.0818137	0.00678064	0.00412727	0.0370432	0.0395105	0.02518	0.0147372	0.0184851	0.00515312	0.00484091	0.00610828	0.00813388	0.0102203	0.00602252	0.00663239	0.00648484
ENSG00000142798	0.00744277	0.00409545	0.00270672	0.0128059	0.0723034	0.0197969	0.0167834	0.00603035	0.00377687	0.00422092	0.0481853	0.00911442	0.0102352	0.00557104	0.0101051	0.0075783	0.00566741	0.00492144	0.00842846	0.00730408	0.0223665	0.0235125	0.0108869	0.00527269	0.00465837	0.00223742	0.00475833	0.0122142	0.00571357	0.00804711	0.0104459	0.00593151	0.007337	0.392839	0.00619932	0.00398933	0.0220676	0.0407967	0.01933	0.0297986	0.0168069	0.00601302	0.00808599	0.00632838	0.00896089	0.0206144	0.00690646	0.00744393	0.00645815
ENSG00000219073	0.893867	0.893867	0.375947	0.869109	0.848308	0.924825	0.871988	0.893867	0.893867	0.861669	1.60896	0.055027	0.893867	0.893867	0.211881	0.547571	0.893867	0.893867	0.893867	0.994046	1.05003	0.84293	0.822184	0.797316	0.806116	0.893867	0.893867	0.338576	0.893867	0.893867	0.893867	0.893867	0.893867	1.4254	0.893867	0.893867	0.702264	0.730499	0.840375	1.29569	0.805846	0.893867	0.45155	0.893867	0.893867	0.571691	0.577136	0.368114	0.446809
ENSG00000142789	0.893867	0.893867	0.370784	1.25327	0.893867	1.26616	1.29004	0.893867	0.893867	0.893867	0.893867	0.0900806	0.893867	0.893867	0.893867	0.571687	0.893867	0.893867	0.893867	1.33332	1.55164	1.06626	0.957641	0.893867	0.893867	0.893867	0.893867	0.893867	1.00313	0.893867	0.893867	0.893867	0.893867	0.893867	0.893867	0.893867	0.906794	0.893867	1.01983	1.51176	0.926711	0.893867	0.464753	0.893867	0.893867	0.893867	0.51037	0.492458	0.893867
ENSG00000218510	0.0442529	0.129377	0.0378621	0.0331663	0.037044	0.0197029	0.0442876	0.120711	0.0845061	0.119589	0.0436642	0.0791325	0.0262455	0.0506128	0.00371748	0.0489216	0.0630521	0.0888424	0.0484773	0.036228	0.0398358	0.0292494	0.0289305	0.0697846	0.096852	0.0206793	0.155585	0.0377113	0.0322248	0.0489884	0.0268284	0.0366585	0.0228226	0.0421497	0.0466058	0.120418	0.0331662	0.0293752	0.0580551	0.0543771	0.0138899	0.0255327	0.0458069	0.0609224	0.0315174	0.021639	0.0384512	0.0510242	0.0806956
ENSG00000070831	0.0428594	0.0733497	0.0836854	0.127536	0.0235406	0.0308454	0.0197776	0.00604138	0.0876317	0.0936268	0.231887	0.022315	0.0790718	0.150743	0.0420162	0.0286828	0.115741	0.0210532	0.051382	0.0291091	0.0200564	0.0239011	0.0511455	0.16262	0.133269	0.101289	0.0756412	0.121664	0.055298	0.0788264	0.0733596	0.0924123	0.0442087	0.169664	0.145089	0.156179	0.0399399	0.0367063	0.0239733	0.0437952	0.181302	0.0763862	0.00851706	0.0545873	0.0423958	0.0996796	0.0370903	0.0787025	0.0230757
ENSG00000184677	0.00569504	0.00487357	0.0366992	0.0161136	0.00283958	0.00451313	0.00545656	0.00419023	0.0126655	0.00552323	0.0063723	0.0133852	0.00730036	0.0049039	0.00303779	0.00273956	0.00390291	0.00344087	0.00651788	0.00678183	0.0033138	0.00354736	0.00764147	0.00565838	0.0243346	0.00190687	0.00401695	0.00408332	0.00582875	0.0141399	0.003755	0.0043915	0.00377404	0.0150444	0.0162084	0.00660362	0.00715261	0.0042515	0.00930237	0.00360756	0.00547489	0.00879282	0.00692966	0.0063904	0.0019721	0.00375097	0.00469521	0.00449952	0.00333647
ENSG00000173372	0.00571228	0.00339478	0.00456206	0.0056968	0.0161581	0.0254024	0.00717797	0.00229121	0.00573917	0.00541629	0.0201595	0.00720573	0.0215183	0.00401109	0.00678483	7.81859e-05	0.00408351	0.00426472	0.00665332	0.00994159	0.0177042	0.00594661	0.00364389	0.00432471	0.00364134	0.0210913	0.00866369	0.00391333	0.00380281	0.0057499	0.0106435	0.0025479	0.00399172	0.0576977	0.00450077	0.00267607	0.00252313	0.014738	0.00629632	0.00785852	0.00595697	0.00385807	0.00151061	0.00609221	0.0294924	0.00509762	0.02262	0.00337988	0.00573128
ENSG00000159189	0.0116694	0.00909886	0.00715579	0.00858544	0.0115471	0.0109949	0.00784472	0.00831017	0.00983505	0.00998042	0.0550139	0.00895452	0.0157979	0.0107204	0.00747781	0.00730499	0.00741913	0.0110125	0.0110058	0.00847147	0.0112503	0.00668359	0.00856447	0.00749038	0.00792994	0.0494412	0.00748169	0.0187638	0.0108645	0.00518868	0.015073	0.00894259	0.0116043	0.0281057	0.00898765	0.0113353	0.00629371	0.00901234	0.00948821	0.00942416	0.00654224	0.00767823	0.0168416	0.00970568	0.0186753	0.00619679	0.0281927	0.00924052	0.0116947
ENSG00000173369	0.00539225	0.00420556	0.00859647	0.0216292	0.0264523	0.0421039	0.0108359	0.0154076	0.00744333	0.00739825	0.0293555	0.0182931	0.0160359	0.00878054	0.0123001	0.0219544	0.0118815	0.00187128	0.0057169	0.00546605	0.0259224	0.0169374	0.0064133	0.00784005	0.00773483	0.0415173	0.00329654	0.00142809	0.00888475	0.0142289	0.031537	0.00359247	0.00690321	0.109348	0.00195088	0.0154336	0.0479873	0.0668235	0.032717	0.000225139	0.00570515	0.00655382	0.0011301	0.0067781	0.00374195	2.54197e-05	0.00705484	2.54197e-05	0.00352747
ENSG00000133216	0.0513258	0.0322688	0.0266348	0.0292834	0.0165734	0.018744	0.0165374	0.0175649	0.0366462	0.0279699	0.203658	0.0354432	0.0459602	0.00813027	0.0144135	0.0367229	0.0333325	0.0304719	0.0393586	0.016271	0.0119198	0.00956792	0.021416	0.00335191	0.0331466	0.0235488	0.0552802	0.0551328	0.0178282	0.0342824	0.050895	0.0287441	0.0213206	0.0489078	0.310338	0.0383365	0.0170868	0.0148211	0.0200488	0.0133488	0.00606757	0.047942	0.0414083	0.0354006	0.0201189	0.0063305	0.0284509	0.0375532	0.0259491
ENSG00000004487	0.00738325	0.00563497	0.00461148	0.00411637	0.00584118	0.0134234	0.0167712	0.00676127	0.0083071	0.00620655	0.0140837	0.006556	0.00455245	0.00638147	0.00380157	0.00507624	0.00726355	0.0115318	0.00843249	0.0134551	0.0041834	0.00347283	0.0261886	0.00398264	0.00593765	0.00775372	0.00960502	2.54197e-05	0.00794895	0.0123934	0.00719396	0.00870756	0.00618429	0.0372336	0.00644997	0.00718187	0.0125614	0.00200017	0.0123523	0.00778866	0.00863404	0.00549867	0.00712866	0.00930357	0.00485701	0.00740658	0.0064399	0.00602385	0.00273263
ENSG00000169641	0.00520804	0.00486171	2.54197e-05	0.0112315	0.0151977	0.00489271	0.00398352	0.00215891	0.00325504	0.00310561	0.00585323	0.00163356	0.0041763	0.0024692	0.00143906	0.00212508	0.0035484	0.00593289	0.00669922	0.00566997	0.00578113	0.00694412	0.00857113	0.00130428	0.00424983	0.00280935	0.00288471	0.00377147	0.0070725	0.00444872	0.00474743	0.00290425	0.00430524	0.0520264	0.00235559	0.00291244	0.00457662	0.0184066	0.00608475	0.00424886	0.00367542	0.000995234	0.00416511	0.00230131	0.000328514	0.00268816	0.00423633	0.0051585	0.000304348
ENSG00000261326	0.00636584	0.00767242	0.00823196	0.0136356	0.00446564	0.0135329	0.0137636	0.00347887	0.0151328	2.54197e-05	0.0108884	0.0086571	0.0026865	0.00847663	0.00685229	0.00257493	0.0133342	0.0113482	0.0227629	2.54197e-05	0.0133427	0.0276055	0.0102333	0.00416543	0.000347356	0.00127836	0.0109783	0.0119444	0.00615348	2.54197e-05	0.0197567	0.00227521	0.00698252	0.0203717	0.0131927	0.00565103	0.0129023	0.0160617	0.0138563	2.54197e-05	0.00987365	0.0209618	0.010417	2.54197e-05	0.00261508	0.00949895	0.00511977	0.0105732	2.54197e-05
ENSG00000125944	0.011963	0.00416326	0.00801018	0.0282216	0.00608567	0.0219869	0.0124001	0.0201448	0.00650212	0.00932737	0.00366513	0.00198368	0.00577644	0.00499976	0.00528802	0.00402463	0.00379457	0.0100911	0.00900145	0.00226401	0.00906618	0.0142703	0.00839815	0.00128793	0.00241319	0.000721912	0.00717252	0.0406287	0.00893552	0.0139652	0.0196981	0.00303833	0.00453483	0.0787852	0.00574126	0.00225046	0.0369193	0.00242333	0.00579221	0.0041645	2.54197e-05	0.00560199	0.0105289	0.00231125	0.00373871	0.00761309	0.00379854	0.00549716	0.00307814
ENSG00000125945	0.0360619	0.0741449	0.0661539	0.0139513	0.00158732	0.00112991	0.000730285	0.065767	0.0521474	0.0283394	0.00710449	0.268249	0.0513632	0.0794001	0.010021	0.0534808	0.0144516	0.0353613	0.0287795	0.00273375	0.0159149	0.00755061	0.0178189	0.13546	0.0881433	0.00554791	0.0204348	0.175497	0.0613183	0.125826	0.0498159	0.0307177	0.0545786	0.0575079	0.149574	0.0485716	0.00961985	0.00403543	0.00638163	0.00201019	0.00893068	0.00990499	0.0430352	0.0474513	0.108092	0.0728318	0.127838	0.179976	0.047558
ENSG00000249087	0.0144533	0.0518326	0.0373248	0.0312583	0.0263008	0.0252048	0.0244079	0.0287626	0.0234746	0.0258361	0.0602247	0.492129	0.0893212	0.0294528	0.0230645	0.042761	0.034217	0.0428466	0.0294105	0.022674	0.034168	0.0290593	0.0567468	0.108108	0.0386345	0.0191019	0.00292858	0.0428307	0.0306545	0.0667828	0.0777761	0.0176211	0.0164986	0.0671072	0.0951835	0.0502327	0.0248155	0.0136558	0.0151601	0.0112768	0.045829	0.0100279	0.0490498	0.0595747	0.0589255	0.0164874	0.133304	0.126042	0.00659237
ENSG00000204219	0.0268269	0.0433853	0.0613445	0.0854769	0.100736	0.0950139	0.0944901	0.0686433	0.0691673	0.0143929	0.171951	0.0199898	0.0169262	0.0295665	0.0250929	0.042403	0.0369718	0.0489773	0.0308353	0.0636268	0.139761	0.0871284	0.0825533	0.0366032	0.0656157	0.0757609	0.0174177	0.0297934	0.0452837	0.0445214	0.0165191	0.0417395	0.0338805	0.0598312	0.0261867	0.042536	0.07425	0.0965765	0.106008	0.0548627	0.0740499	0.0186049	0.0195774	0.0267677	0.0504904	0.0413337	0.0218527	0.0282308	0.0473026
ENSG00000088280	0.00833701	0.00860053	0.00213874	0.000130981	0.0272183	0.0163067	0.00798595	0.00260911	0.00449782	0.00673966	0.0533178	0.00337641	0.00347983	0.00372005	0.00060469	0.00521647	0.00633107	0.00718616	0.00835459	0.00152678	0.00129911	0.00527085	0.00289603	0.00378605	0.00301654	0.0143951	0.0144753	0.0347438	0.00330961	0.00900293	0.00518453	0.0158833	0.0100706	0.0292161	0.00590064	0.00640699	0.00253843	2.54197e-05	0.00240367	0.00540575	0.0134165	0.00702132	0.00566852	0.00798124	0.00277879	0.00536663	0.00610629	0.00223156	0.00169976
ENSG00000007968	0.124557	0.0751902	0.0347421	0.0944084	0.0921271	0.133498	0.104242	0.00736715	0.0894898	0.0899732	0.00755664	0.0966503	0.0331554	0.0093456	0.00447295	0.0175403	0.0721537	0.0720547	0.108483	0.114935	0.125762	0.10494	0.104009	0.00648985	0.0960497	0.00126518	0.0954953	0.0790831	0.118458	0.0941659	0.0336333	0.00897852	0.158298	0.0158209	0.059179	0.11552	0.138116	0.107898	0.11703	0.122005	0.0960512	0.00769776	0.0717845	0.0110862	0.0858142	0.0928415	0.0051014	0.0184947	0.0766145
ENSG00000117318	0.00190701	0.000967763	6.67712e-05	0.00542672	0.0109382	0.00646108	0.00340121	0.00213097	0.00197569	0.00162493	0.00775304	0.00671185	0.0034309	0.00093282	0.00211639	0.000859397	0.00221925	0.00143597	0.00153339	0.0034425	0.0020031	0.00408237	0.00341106	0.00194702	0.00149985	0.00306589	0.00178637	0.00386423	0.0011054	0.0015823	0.00325074	0.00307221	0.00206581	0.0148108	0.0030176	0.00104443	0.00366948	0.00384416	0.0048458	0.00388553	0.00642904	0.00222221	0.00145919	0.00167897	0.00174443	0.00191148	0.00128792	0.00254741	0.00285721
ENSG00000142676	0.00728845	0.00354699	0.0228637	0.00181608	0.00641357	0.00110157	0.004771	0.00235316	0.00165637	0.00443038	0.00555658	0.000903952	0.00763805	0.00459395	0.0030466	0.0120237	0.00840143	0.000558832	0.00117551	0.00253929	0.00109194	0.00138014	0.00189866	0.00411262	0.00367596	0.00313115	0.0011541	0.00393753	0.00538321	0.010636	0.00967931	0.0016764	0.00307659	0.0057749	0.000728763	0.0018983	0.000950157	0.0015598	0.00139397	0.00180828	0.00122237	0.00554878	0.000257891	0.00567455	0.0108362	0.00316356	0.000957388	0.000908451	0.000962085
ENSG00000011007	0.00393757	0.00355561	0.00259333	0.00775567	0.000564412	0.00863646	0.00770816	0.00676783	0.00272839	0.00467066	0.00337288	0.00255456	0.00350591	0.0122819	0.00231467	0.00531732	0.00304707	0.00411354	0.00268837	0.00981401	0.00975009	0.00630483	0.0216386	0.00211348	0.00132217	0.00167209	0.00353887	0.00650221	0.00274564	0.00250457	0.00482397	0.00420304	0.00403882	0.0203449	0.00200973	0.00506625	0.00777098	0.00151664	0.00776667	0.00437969	0.00044168	0.00170116	0.0152357	0.00250226	0.00203042	0.00751986	0.0023909	0.00254858	0.00180655
ENSG00000057757	0.00345506	0.000484063	2.54197e-05	0.00182717	0.00133733	0.00241142	0.00163946	0.00318531	0.0013961	0.00208844	0.00290603	0.00215025	0.00171798	8.62504e-05	0.00218844	0.000872027	0.00391687	0.00302375	0.00392042	0.00244665	0.00339732	0.0056894	0.0058963	0.00223846	0.00140824	0.00163516	0.00257084	0.00435902	0.00190788	0.00167512	0.00186792	0.0019735	0.00377349	0.0106667	0.00238863	0.00309848	0.00186278	0.00427906	0.00177254	0.00163182	0.00565244	0.00187152	0.00536321	0.00283486	0.00186732	0.00303832	0.000675048	0.00196529	0.00205853
ENSG00000011009	0.00425382	0.00405735	0.00236631	0.000973711	2.54197e-05	0.00343125	0.00402856	0.000872993	0.00353245	0.0071953	0.00317656	0.00232825	0.00320014	0.00251992	0.00512205	2.54197e-05	0.000455459	0.0104823	0.00401674	0.00275171	0.00096393	0.0161665	2.54197e-05	0.000862998	0.00256191	0.00306024	0.0042374	0.00149876	0.00221349	0.00683077	0.00161676	0.00297485	0.000440472	0.0025784	0.000409034	0.00589712	0.00166269	0.00478284	0.00523995	0.00127579	0.00298177	0.00210815	0.00203261	0.00112728	0.000551974	0.000815364	0.0042212	2.54197e-05	2.54197e-05
ENSG00000117308	2.54197e-05	0.0118759	0.00798389	0.0144992	0.0159281	0.0153419	0.0139327	0.00961518	0.0124205	0.0140466	0.0262608	0.0160101	0.0354677	0.010641	0.0116925	0.00704927	0.0112554	0.0118026	0.00919509	0.00216025	0.0116032	0.00973427	0.0108282	6.13777e-05	0.0129361	0.083792	0.0151186	0.0475185	0.0159055	0.0131007	0.023525	0.0440252	0.0247553	0.0280035	0.0107542	0.0186323	0.0123807	0.0140331	0.0294071	2.54197e-05	0.00883375	0.00479046	0.00945478	0.0174808	0.0114733	2.54197e-05	0.0350348	0.00781349	0.0107287
ENSG00000117305	0.0115198	0.00402364	0.00710975	2.54197e-05	0.0142708	0.00734508	0.00869838	0.00938294	0.00485475	0.00910331	0.0026425	0.00651919	0.00470935	0.00440562	0.0029219	0.0125102	0.00717197	0.00554318	0.00945401	0.00319784	0.0148705	0.00926451	0.00951112	0.00611719	0.00562586	0.00236332	0.00731299	0.00199697	0.0103421	0.0110299	0.00684165	0.00601472	0.00651057	0.0168849	0.00282991	0.00388405	0.0115596	0.00330056	0.00750702	0.010576	0.0090787	0.00756605	0.00295315	0.00544006	0.0115475	0.00369456	0.00348849	0.00421309	0.00753815
ENSG00000179163	0.0151885	0.00799505	0.0161037	0.0223244	0.00737668	0.0458492	0.0177996	0.00683155	0.0103861	0.0095334	0.0626455	0.0120686	0.0133351	0.00961218	0.00175187	0.0152857	0.00831528	0.00820519	0.0124466	0.017925	0.0125557	0.0144268	0.0332477	0.00823198	0.00853636	0.0712504	0.0491397	0.0133642	0.018493	0.00831255	0.0114185	0.0233465	0.00477063	0.0476518	0.00173671	0.0110756	0.0228024	0.0104204	0.0313932	0.00396243	0.0439293	0.00964092	0.011416	0.00956521	0.00413271	0.00606338	0.00695779	0.00401537	0.00861173
ENSG00000189266	0.00868096	0.0233871	0.00348728	0.0105725	0.00623428	0.00716664	0.0124168	0.0090792	0.00670811	0.00952077	0.00357928	0.00634675	0.00783315	0.00609642	0.00405954	0.00961156	0.00811185	0.0126152	0.00778407	0.0119658	0.00605855	0.0137142	0.0155008	0.00772992	0.00848266	0.00989076	0.00443136	0.00675723	0.00544464	0.0107272	0.00680491	0.0050938	0.00696008	0.00622821	0.00661668	0.0144479	0.0167278	0.0075963	0.01305	0.00616958	0.0130174	0.00833385	0.00647856	0.0149403	0.00378804	0.00387459	0.00840181	0.00829335	0.00647587
ENSG00000188529	0.00376303	0.0128754	0.00836627	0.00626893	0.00209133	0.00216083	2.54197e-05	0.00188604	0.00410388	0.00447047	0.00387996	0.00181905	0.00362298	0.00348204	0.00167213	0.00400083	0.00328109	0.00569636	0.00565704	0.0101406	0.00188475	0.00740465	0.00911483	0.00210195	0.00318887	0.00246721	0.0023466	0.00491366	0.0044366	0.0020678	0.00351559	0.00402646	0.00223985	0.0132675	0.000854564	0.00612531	0.010813	0.00148862	0.0122954	0.0062594	0.00465731	0.00317279	2.54197e-05	0.00685434	0.000828371	0.00378063	2.54197e-05	0.00498098	0.000975356
ENSG00000142661	0.0871023	0.0244482	0.200713	0.323399	0.276324	0.34506	0.346152	0.248823	0.599154	0.00427597	0.489691	0.0581949	0.0721457	0.00910141	0.0181585	0.192582	0.0501241	0.0199253	0.0377202	0.331669	0.380539	0.287623	0.308712	0.0289057	0.350005	0.248322	0.00336891	0.0705327	0.0315183	0.0705437	0.070738	0.074109	0.0692038	0.143261	0.281142	0.035737	0.289201	0.276916	0.306665	0.328405	0.26294	0.0622295	0.0282867	0.0698208	0.291258	0.348336	0.00898175	0.297262	0.201753
ENSG00000185436	0.0870475	0.141491	0.104333	0.0507254	0.00523818	0.0287542	0.0297444	2.54197e-05	0.210936	0.291321	0.0372012	0.00499305	0.0211682	0.00814734	0.0215438	0.0316447	0.0445095	0.0279846	0.00907087	0.0178174	0.0409253	0.0108931	0.0262898	0.0151341	0.205574	0.162733	0.019145	0.0166567	0.0539024	0.01671	0.0179872	0.0123891	0.00923727	0.0172028	0.0196324	0.108487	0.055426	0.00473778	0.0346366	0.00919035	0.0147924	0.0333988	0.010747	0.02452	0.0831418	0.003704	0.00517204	0.011702	0.331368
ENSG00000158055	0.0267224	0.026031	0.00712509	0.00173896	0.00380241	0.0106782	0.0106517	0.031971	0.0233776	0.00715697	0.0114245	0.0217006	0.0065757	0.0132649	0.00456731	0.00432757	0.0187521	0.0563399	0.015099	0.00907383	0.000419439	0.00530698	0.00610736	0.0120824	0.0158471	0.00344005	0.00415732	0.0101285	0.0344659	0.0280744	0.00667931	0.0244018	0.0184168	0.0234832	2.54197e-05	0.0333814	2.54197e-05	0.00653916	0.0032368	0.0124046	0.0280323	0.0044687	0.0145306	0.00309043	0.0269913	0.00113812	0.00417824	0.0165351	0.0162472
ENSG00000001460	0.0367243	0.0522167	0.0114753	0.0149539	0.00562123	0.0137794	0.00818635	0.0226236	0.0240424	0.0159826	0.0592941	0.0171318	0.0243993	0.0165319	0.00499166	0.019704	0.0190273	0.0373807	0.0179188	0.00671686	0.00708516	0.00195809	0.0178855	0.01171	0.0235809	0.0311343	0.0219551	0.0333514	0.045536	0.0302107	0.0280372	0.0128407	0.02053	0.0781701	0.00868866	0.0415337	0.0182374	0.00838887	0.00380436	0.00961009	0.01674	0.0115087	0.0241086	0.0207883	0.0244294	0.0114762	0.00978416	0.0154248	0.0181011
ENSG00000001461	0.0159961	0.0163373	0.00186096	0.00119778	0.00290377	0.00406925	0.00191958	0.00545786	0.00684565	0.00989234	0.0092912	0.00555547	0.0115562	0.00740168	0.022556	0.0144526	0.011123	0.0199942	0.0113063	0.00250005	0.000835538	0.00227148	0.00362495	0.00481411	0.00960618	0.00776073	0.00467098	0.0111262	0.0268332	0.00428132	0.0107894	0.00798357	0.00406029	0.0137476	0.00556243	0.0506968	0.00322238	0.00350795	0.00305171	0.00208729	0.00249051	0.00823674	0.0071985	0.00472775	0.00702292	0.00570499	0.00617769	0.00455369	0.00548648
ENSG00000117602	0.02066	0.0549192	0.0138772	0.0251724	0.00469501	0.0155838	0.000804164	0.0124667	0.0111472	0.0219238	0.0342946	0.00830743	0.00658202	0.00690431	0.019454	0.00596377	0.0186385	0.036103	0.0126105	0.00625451	0.0360691	0.00950638	0.00874333	0.00720594	0.0205387	0.00643341	0.0123031	0.0597137	0.0182538	0.00925962	0.00986141	0.0065933	0.009206	0.00928467	0.0210634	0.0554257	0.0288386	0.00412761	0.00570219	0.00973238	0.00266851	0.0049938	0.00751091	0.00659863	0.0248898	0.00728203	0.00883927	0.00827193	0.0270852
ENSG00000184454	0.0842824	0.0692099	0.0366907	0.0878837	0.113947	0.0886174	0.0974958	0.0958402	0.0145418	0.0622689	0.279118	0.0342078	0.0535608	0.181642	0.0965541	0.0910535	0.115568	0.0814839	0.0658747	0.0927894	0.118734	0.0755045	0.0672561	0.0341001	0.027992	0.156321	0.0727416	0.0766817	0.025811	0.0767887	0.0514622	0.0824448	0.0528921	0.14498	0.0896144	0.0907538	0.0947933	0.13199	0.10239	0.103755	0.111104	0.0274268	0.0256483	0.0376722	0.133327	0.0329887	0.0215473	0.0327052	0.0969696
ENSG00000133226	0.0101407	0.00772284	0.0160584	0.0275805	0.00297657	0.0904515	0.0151703	0.0421537	0.00383754	0.00791669	0.00347946	0.00526935	0.0230612	0.0077492	0.00805268	0.0083511	0.00404222	0.00776134	0.0213925	0.00211619	0.00329437	0.0120567	0.0718611	0.00303045	0.00300095	0.0168677	0.00575844	2.54197e-05	0.012381	0.0109219	0.00954681	0.00396926	0.0157142	0.0107944	0.00613432	0.0169088	0.0102955	0.00149004	0.00169977	0.0107613	0.0335047	0.0070211	0.00704658	0.0145726	0.00363083	0.00666428	0.0320703	0.00375017	0.000594248
ENSG00000169504	0.00102342	0.00129583	2.54197e-05	0.00203962	0.00509751	0.0031355	0.00185336	0.000681459	0.000881918	0.00216705	0.0124269	0.0108289	0.00327337	0.000752263	0.00326463	0.00103391	0.0012944	0.000844361	0.00135467	0.00098715	0.00011386	2.54197e-05	0.000968625	0.00077945	0.00054209	0.00169854	0.00163156	0.0031603	0.00110265	0.00204289	0.00522456	0.00251473	0.00143589	0.00524218	0.00286134	0.00131479	0.00210325	0.00399355	0.000610541	0.00150115	0.00311017	0.00278305	0.00148708	0.00142856	0.0014404	0.00368315	0.00231929	0.000892572	0.000576356
ENSG00000020633	0.0312303	0.0256626	0.0279015	0.0395484	0.0368164	0.041239	0.0398245	0.0378869	0.0396692	0.0430182	0.00898092	0.028346	0.00955087	0.00818708	0.013482	0.0199289	0.0151179	0.0346939	0.0247279	0.0408466	0.0492481	0.0344426	0.0357774	0.0127975	0.0393312	0.0286496	0.0475428	0.0244739	0.0391758	0.033954	0.00976895	0.00881307	0.025238	0.00659221	0.0260333	0.050814	0.0441884	0.051787	0.0415788	0.0465613	0.0317948	0.00948334	0.0276542	0.00988898	0.047867	0.033977	0.00426279	0.0127252	0.0350303
ENSG00000117614	0.00526492	2.54197e-05	0.00334752	0.0717016	0.0522457	0.0159888	0.0150441	0.00325722	0.00261343	0.00154725	0.00174435	0.0103645	0.0091718	0.000596628	0.00381574	0.0368486	0.00254498	0.0217573	0.00573036	0.0331771	0.0430625	0.0637072	0.0480603	0.00148669	0.00285812	0.00665188	5.97597e-05	0.00498087	0.01779	0.00894941	0.00718313	0.00149085	0.0019017	0.00916887	0.0048902	0.00209948	0.00590348	0.0289278	0.0500269	0.0353538	0.0610005	0.00267728	2.54197e-05	0.000320055	0.000393291	0.0303824	0.00248134	0.00387959	0.00144258
ENSG00000117616	0.00811045	0.0046657	0.00496489	0.00254136	0.00457523	0.00754414	0.00309469	0.00303746	0.0183109	0.00355354	0.00528591	0.00527198	0.00503624	0.00355845	0.00439515	0.00431149	0.00317664	0.00561998	0.0168938	0.00386168	0.00339633	0.00539769	0.00306569	0.00291274	0.00346144	0.00505586	0.00326351	0.00398866	0.00365653	0.0032505	0.0112455	0.00349898	0.00672596	0.00809986	0.00334416	0.00481988	0.00320502	0.00363147	0.00285151	0.00435491	0.00502097	0.013426	0.00270276	0.00616992	0.00340918	0.003724	0.00475539	0.00295623	0.00528845
ENSG00000261349	0.204595	0.148106	0.221901	0.287285	0.158804	0.277417	0.297064	0.358858	0.217271	0.192816	0.0066101	0.233237	0.160486	0.272343	0.152672	0.154805	0.189865	0.158255	0.204582	0.27676	0.263674	0.274709	0.268112	0.214418	0.217695	0.183062	0.32567	0.250142	0.0717765	0.121031	0.139354	0.215812	0.168662	0.0913456	0.217981	0.197075	0.274514	0.148799	0.254737	0.287888	0.256686	0.194371	0.181054	0.119345	0.156216	0.141583	0.153557	0.236538	0.169421
ENSG00000187010	0.236264	0.0257206	0.0667163	0.0823586	0.0875429	0.0827031	0.0776789	0.122738	0.125532	0.158642	0.113028	0.116843	0.102362	0.186733	0.0248084	0.131119	0.0272467	0.0871253	0.121632	0.0997772	0.118413	0.0814549	0.0811043	0.0619457	0.0299074	0.0257759	0.134694	0.146492	0.224536	0.0506477	0.0593799	0.043281	0.167408	0.108329	0.125342	0.0517434	0.114888	0.0916715	0.0835735	0.0144255	0.0792797	0.127615	0.104647	0.0454672	0.103956	0.126428	0.0179263	0.0898328	0.0869058
ENSG00000183726	0.0153202	0.0241083	0.0126143	0.0155421	0.0144593	0.0204518	0.0129438	0.0132805	0.0169678	0.0154472	0.0123298	0.009959	0.0116351	0.00854852	0.0111439	0.014089	0.0119668	0.011916	0.0105086	0.0131833	0.016199	0.0145793	0.0111372	0.0108786	0.017506	0.015739	0.0167533	0.0157077	0.0184981	0.0115535	0.0118797	0.00988067	0.0117924	0.0105821	0.0060708	0.0169599	0.019943	0.0114984	0.0209538	0.0125938	0.0128092	0.0125807	0.0083351	0.012153	0.0154255	0.0115204	0.00643614	0.0124805	0.0069811
ENSG00000204178	0.0101298	0.0128162	0.000860542	0.00402153	0.00553025	0.00894423	0.00382783	0.00699491	0.00463832	0.0061047	0.00223677	0.00395313	0.00151337	0.00055194	0.00236	0.00397528	0.00787119	0.0114861	0.00569063	0.00275179	0.00433395	0.00116214	0.00437192	0.00288588	0.00318738	0.00572908	0.00822631	0.0271797	0.00952251	0.00611845	0.00583765	0.00443649	0.00612789	0.00964795	0.002488	0.00922619	0.0122192	0.00543124	0.00453764	0.00111661	0.00680866	0.00404019	0.00263553	0.00612037	0.0111506	0.00533691	0.00114655	0.00403226	0.00859936
ENSG00000157978	0.0123479	0.0124569	0.0059674	0.0582388	0.0131942	0.0609813	0.0681057	0.0142383	0.00921126	0.0236709	0.031068	0.00807006	0.00507764	0.0276952	0.0100982	0.0175526	0.0132095	0.0137226	0.0159532	0.0845044	0.0735602	0.05207	0.057802	0.0159525	0.0106952	0.00267378	0.0142865	0.00573797	0.0298748	0.0151976	0.00847469	0.0286868	0.0222203	0.0304439	0.00836521	0.0109656	0.0622996	0.0142625	0.0620916	0.0678584	0.0351988	0.0082047	0.018463	0.0342411	0.0276395	0.00791472	0.0113204	0.00897194	0.0187791
ENSG00000117643	0.0079752	0.00879709	0.00739565	0.00853787	0.00705724	0.0015063	0.00174382	0.0262115	0.00901852	0.0132025	0.03917	0.0267212	0.00550454	0.00589728	0.00795946	0.00729547	0.00981334	0.00898441	0.0182168	0.0131507	0.003066	0.0102245	0.00880768	0.0171054	0.00840392	0.0232555	0.00878651	0.0465773	0.00753463	0.00802162	0.00975482	0.00716224	0.0088807	0.0385607	0.0100231	0.0119128	0.00781109	0.00684426	0.00443455	0.0148475	0.00626827	0.0156954	0.0170185	0.0122626	0.00114749	0.00523512	0.0117477	0.00814511	0.00829478
ENSG00000162430	0.0121367	0.00929897	0.0117285	0.0132833	0.0162154	0.015443	0.0116099	0.0108142	0.00942291	0.011941	0.0657226	0.00705716	0.00916546	0.0096955	0.0136573	0.00805777	0.0106528	0.0115865	0.00955874	0.0129647	0.0117293	0.0124613	0.00989025	0.0123792	0.00998415	0.0091207	0.014353	0.0117891	0.0126944	0.0129652	0.00884113	0.0139114	0.0105048	0.00954626	0.0145087	0.0103091	0.0091285	0.0132529	0.0146622	0.0160599	0.0127668	0.00881272	0.0117684	0.00870291	0.00829925	0.0165612	0.0110209	0.0105311	0.00672491
ENSG00000228172	0.00668334	0.0137806	0.000673077	0.0148682	0.00184036	0.0144529	0.00377824	0.0059685	0.00338532	0.00925064	0.00769527	0.0206955	0.0107319	0.000852182	0.0653172	0.00774836	0.00927079	0.0180936	0.00865853	2.54197e-05	2.54197e-05	0.0042417	0.00529279	0.00376577	0.00126664	0.00804294	0.00317529	0.00449647	0.00740301	0.00894486	0.00973987	0.00479372	0.00823463	0.0292142	0.0580805	0.0112798	2.54197e-05	0.00198473	0.00814514	0.00816665	0.0207433	0.00800359	0.0112595	0.010886	0.00878389	0.010177	0.00401896	0.00726127	0.0155848
ENSG00000117640	0.00834666	0.0195208	0.0211017	0.00411304	0.00260081	0.00570298	0.00747589	0.00650235	0.00566115	0.016743	0.00485488	0.00486711	0.00346745	0.00908203	0.02071	0.00367299	0.00873904	0.00979018	0.0097751	0.00334871	0.00335493	0.00584877	0.00610869	0.0186014	0.00984099	0.0114983	0.0285311	0.00650987	0.00648344	0.00814945	0.0062012	0.00784197	0.00665129	0.0143717	0.0342289	0.0132315	0.0113338	0.00239986	0.00665677	0.00529728	0.0114531	0.00484168	0.016238	0.00519366	0.0072798	0.00394463	0.0122676	0.00719683	0.00634285
ENSG00000182749	0.00899569	0.00783583	0.00329526	0.00840224	0.00193063	0.00569021	0.00469175	0.0052478	0.00746793	0.0101764	0.00851978	0.0109186	0.00550107	0.00221293	0.00200732	0.00438683	0.00521145	0.00309803	0.00516369	0.0083351	0.00361838	0.00925495	0.00697684	0.00485782	0.00579232	2.54197e-05	0.00943085	0.0076656	0.00361353	0.0040109	0.00715518	0.00418635	0.0051114	0.00804166	0.00680607	0.00924588	0.00376235	0.00696371	0.00375135	0.00810877	0.00604801	0.00581983	0.00343637	0.00842139	0.00639759	0.00383391	0.00375858	0.00411758	0.0129855
ENSG00000117632	2.54197e-05	0.10084	0.00868762	2.54197e-05	0.00594059	0.00436351	0.0501047	0.0155874	0.00149828	0.0135652	0.00019213	2.54197e-05	0.0129257	0.0114834	0.000723654	0.00917948	0.00224926	0.0304862	0.0134858	0.00364518	0.00882569	0.00182415	0.0122901	0.00752372	0.00750518	0.00341156	0.0093508	0.0271673	0.01267	0.0255288	0.020383	0.0166378	0.0451089	0.0520079	0.0145595	0.037201	0.0167906	0.0115901	0.0134574	2.54197e-05	0.00490508	0.00300581	0.0232516	0.0336832	0.000856128	0.0293365	0.0154677	0.00559398	2.54197e-05
ENSG00000158006	0.0202254	0.0244183	0.0423636	0.0173494	0.00662583	0.0177719	0.00791559	0.0261797	0.00818341	0.0051444	0.0111984	0.0206275	0.00627917	0.00321541	0.00522609	0.00966397	0.00613631	0.0187953	0.00573169	0.00813272	0.0111926	0.0166371	0.0177213	0.00723205	0.0141924	0.00188502	0.0214775	0.0040662	0.0133809	0.0122623	0.00986308	0.00827537	0.00784586	0.022346	0.00801632	0.0235305	0.0185251	0.0112416	0.0133967	0.00630429	0.0310726	0.00873156	0.0165027	0.0142182	0.00523483	0.00690084	0.00255696	0.00755673	0.00790342
ENSG00000158008	0.0383397	0.0537769	0.0414535	0.00303778	0.0807693	0.0031533	0.0261705	0.0284521	0.101101	0.057631	0.205165	0.139743	0.0235459	0.0537456	0.0255241	0.0489486	0.062957	0.0466984	0.0587248	0.0136762	0.000845477	0.00632185	0.0306641	0.0485005	0.0460471	0.0480043	0.0411262	0.0632904	0.00584941	0.0488505	0.0262914	0.0301213	0.0455028	0.110692	0.0328241	0.0625209	0.000558985	0.0726093	0.00226551	0.0110702	0.0128993	0.0555416	0.0446649	0.0538543	0.0206815	0.0358422	0.0382659	0.0604922	0.0278233
ENSG00000158022	0.121148	0.113449	0.0656075	0.134395	0.264366	0.143501	0.114894	0.0932473	0.142056	0.00899982	0.208835	0.0976402	0.0413955	0.106013	0.128075	0.0853983	0.106398	2.54197e-05	0.147774	0.118933	0.139408	0.132866	0.12162	0.124304	0.0676353	0.120762	0.00560277	0.105111	0.0982825	0.123936	0.0283739	0.164123	0.165757	0.122305	0.101646	0.108007	0.122138	0.27307	0.111823	0.127853	0.102071	0.109074	0.0647862	0.127394	0.21007	0.172863	0.00629162	0.112019	0.206531
ENSG00000175087	0.0129155	0.0183704	0.00699105	0.0437193	0.0120971	0.000609458	0.0690899	0.00438574	0.0105873	0.0013994	0.00329343	0.000811888	0.0240279	0.00779934	0.00518134	0.0281918	0.00824724	0.0697786	0.0129932	0.0221731	0.0324709	0.00869406	0.0225879	0.00153564	0.00983271	0.00968184	0.0161759	0.0217398	0.030943	0.0267393	0.0461373	0.0037163	0.00984412	0.0178114	0.0129115	0.0310662	0.0190905	0.00187713	0.0263807	0.0099205	0.0287356	0.0178838	0.0180417	0.0150908	0.00870502	0.030176	0.017213	0.0146823	0.00815116
ENSG00000197245	0.0647215	0.0650553	0.0448551	0.08148	0.0983777	0.0865782	0.0952242	0.0668825	0.0539581	0.0832465	0.617343	0.0573166	0.0773305	0.0777911	0.0553439	0.0523719	0.109574	0.0676602	0.0831933	0.0657167	0.0787091	0.0909305	0.11078	0.0787909	0.0633758	0.297699	0.0728759	0.227731	0.0784736	0.0806882	0.0726177	0.31556	0.0659466	0.523745	0.0558815	0.109874	0.093684	0.096825	0.0861472	0.0924694	0.0648068	0.0570619	0.0436787	0.152537	0.126563	0.0949412	0.0571662	0.0526365	0.0419341
ENSG00000236782	0.0260134	0.0154373	0.0212487	0.0363234	0.00307477	0.0469925	0.0451894	0.01604	0.020771	0.0322284	0.0114864	0.0228525	0.0188387	0.023225	0.0158079	0.0121184	0.0244734	0.024817	0.0225573	0.023024	0.0321789	0.0322315	0.0397491	0.0234146	0.0174163	0.0131911	0.0388416	0.0287952	0.0173737	0.020839	0.0185592	0.0264517	0.0238261	0.0395903	0.0201353	0.0172458	0.0297911	0.00406065	0.0300082	0.0363818	0.0325967	0.0188989	0.0384768	0.0274197	0.00829214	0.0314358	0.014974	0.0134597	0.0104058
ENSG00000142684	0.0543946	NA	NA	NA	NA	NA	NA	NA	0.0329774	NA	0.0370011	0.0581208	0.0426738	NA	0.0303092	NA	0.0550839	NA	0.0467443	NA	NA	0.0886717	NA	0.0815624	NA	0.0393479	0.0971372	0.0769795	0.0242704	0.0391633	0.032332	0.0471301	0.0476469	NA	0.0412234	NA	NA	NA	NA	NA	NA	0.0514462	NA	0.0395694	0.0171318	NA	NA	0.0335338	NA
ENSG00000130695	0.0211479	0.0366179	0.0450651	0.0335079	0.00904698	0.00622005	0.00413855	0.0134815	0.0187193	0.0137778	0.00281971	0.0135106	0.00960999	0.0203175	0.00168632	0.00869959	0.0230258	0.0146502	0.0146056	0.0113262	0.00746434	0.00755636	0.0131855	0.0108792	0.026472	0.00617295	0.0189259	0.0213084	0.00916259	0.0286151	0.0156007	0.00375806	0.0247837	0.0309952	0.0146322	0.0425025	0.00973584	0.00358675	0.005995	0.00752859	0.0200341	0.00944432	0.00535121	0.0166615	0.0433522	0.0124678	0.0156114	0.010045	0.0137182
ENSG00000142669	0.00879231	0.0124662	0.00563409	0.00331918	0.00188475	0.0018134	0.00324988	0.00348117	0.00572722	0.0177375	0.00287471	0.00341317	0.0102043	0.00490918	0.00747265	0.00433631	0.00401952	0.005386	0.00439206	0.00266214	0.00109493	0.000790151	0.00104744	0.00971534	0.006879	0.00699932	0.01487	0.00191066	0.0052116	0.00340236	0.0115472	0.00228074	0.00459909	0.0145402	0.00188385	0.00825372	0.00216216	0.000870598	0.00164832	0.00344152	0.000744605	0.00674486	0.00159866	0.00302849	0.00375386	0.00291947	0.00556734	0.00954234	0.00400771
ENSG00000158062	0.00716415	0.0108432	0.0164917	0.00444571	0.011528	0.00904699	0.00189357	0.0100787	0.0108341	0.0101931	0.0175826	0.005732	0.00768838	0.0095337	0.00823051	0.00858676	0.00631263	0.00475312	0.00621726	0.00385063	0.00510933	0.00392024	0.00681986	0.00857204	0.00979124	0.00558738	0.00735149	0.00312413	0.0102061	0.0082215	0.0105893	0.00977986	0.00762942	0.0144078	0.00690389	0.0250889	0.00136167	0.0103128	0.00525118	0.00231253	0.00686176	0.0127697	0.0070597	0.00950115	0.00868164	0.00372506	0.0047914	0.00448404	0.0117225
ENSG00000169442	0.0550578	0.061541	0.0443504	0.0635525	0.0711179	0.0569901	0.0133435	0.0633326	0.0588674	0.0795436	0.00249665	0.172447	0.0321572	0.0106946	0.105766	0.0587273	0.100902	0.0585181	0.0748465	0.0236316	0.0640804	0.060977	0.069003	0.0104677	0.0641381	0.168272	0.531158	0.144869	0.111705	0.043014	0.0358553	0.0105027	0.0175251	0.109125	0.0531947	0.064877	0.185142	0.106505	0.06003	0.0636207	0.0016312	0.020984	0.106001	0.0672714	0.19881	0.038777	0.0534274	0.0460391	0.165947
ENSG00000176092	0.0993052	0.084325	0.0172771	0.0817006	0.065182	0.0906719	0.0766908	0.0164719	0.0209363	0.100551	0.0817943	0.0853103	0.0102895	0.028066	0.00646482	0.00372227	0.0940016	0.0883955	0.107176	0.0738438	0.0985898	0.0702563	0.0797565	0.0410402	0.090768	0.0515255	0.100569	0.0746014	0.104735	0.0371072	0.0120441	0.0656252	0.085085	0.0655939	0.0772779	0.0998467	0.0792165	0.0681841	0.082815	0.0726671	0.0607762	0.00627373	0.0595695	0.102565	0.0765313	0.0476105	0.00629127	0.0571956	0.0710308
ENSG00000117682	0.00544511	0.00425825	0.0135344	0.00736592	0.010697	0.00340813	0.00300473	0.00394126	0.00570777	0.00393129	0.0043785	0.00490336	0.0139287	0.00775164	0.00299972	0.00267199	0.0029871	0.0046545	0.00501836	0.00295927	0.00460561	0.00537146	0.00551091	0.00576641	0.00526443	0.00503558	0.00757137	0.00709191	0.00585195	0.00319493	0.0154624	0.00565636	0.00428841	0.0153319	0.00312359	0.00568079	0.00505901	0.0136756	0.00387465	0.00886826	0.00411559	0.00537359	0.00560003	0.0055691	0.00187524	0.00271595	0.00468515	0.00572044	0.00411286
ENSG00000198830	0.153493	0.212314	0.236762	0.261619	0.224915	0.32786	0.359291	0.178878	0.212846	0.205023	0.154541	0.24813	0.152977	0.124593	0.177575	0.125313	0.198769	0.192541	0.161391	0.317868	0.311417	0.274083	0.328402	0.162903	0.148965	0.228284	0.278438	0.235136	0.157733	0.131026	0.19521	0.175112	0.138192	0.222443	0.146126	0.185929	0.37852	0.19829	0.277775	0.241167	0.284772	0.193134	0.199594	0.189176	0.132128	0.204409	0.186989	0.17969	0.182289
ENSG00000117676	0.00363239	0.00604409	0.00499883	2.54197e-05	0.00219485	0.00710452	0.0023556	0.00210952	0.00361171	0.00813095	0.0016161	0.00349182	0.00206798	0.000660283	0.00115031	0.00105679	0.00348119	0.0020464	0.00242257	0.00151559	0.00205309	0.0017827	0.00442135	0.000649274	0.00649646	0.00485393	0.00753439	0.0409136	0.00417152	0.00151472	0.00132757	0.000443107	0.00167247	0.000776294	0.00102719	0.00950176	0.00357566	0.00340446	0.00188702	0.00313435	0.00295905	0.0016645	0.00166736	0.00144123	2.54197e-05	0.00225332	0.000707912	0.000780442	0.00620263
ENSG00000117713	0.00479419	0.00461964	0.0024426	0.00647236	0.0014677	0.00383751	0.00117758	0.00182479	0.00148314	0.00312336	0.00206195	0.00136301	0.00213238	0.00196904	0.00239505	0.00418691	0.00414455	0.00700746	0.00304225	0.00647236	0.00355514	0.00179089	0.00281592	0.00301989	0.00352931	0.00681492	0.00336652	0.00582126	0.00307706	0.00287006	0.003038	0.00601713	0.00337677	0.016514	0.00519995	0.00146627	0.00225581	0.00146564	0.00232361	2.54197e-05	0.00624354	0.00132593	2.54197e-05	0.00316916	0.00433351	0.00489173	0.00359655	0.00191674	0.00325337
ENSG00000060642	0.0240378	0.0357581	0.0275354	0.062847	0.00339232	0.0266487	0.00189646	0.041872	0.0342134	0.0316871	0.0204212	0.0192364	0.0251628	0.0213517	0.00265505	0.00496503	0.0169066	0.0526206	0.0276197	0.00905806	0.012914	0.0471821	0.0141304	0.0144443	0.0245664	0.0098088	0.0340893	0.0105042	0.0322191	0.00991746	0.013484	0.0171221	0.0124664	0.149711	2.54197e-05	0.0176976	0.0197849	0.0330811	0.00727678	0.0218532	0.0300321	0.0201215	0.0203507	0.018492	0.0256754	0.0314375	0.0238525	0.0310821	0.0268673
ENSG00000204160	0.00316122	0.00222665	2.54197e-05	0.00864109	0.00368187	0.00314695	0.00246042	0.00111606	0.00266168	0.00580117	0.00413349	0.0111139	0.00313481	0.00390871	0.00707705	0.00371044	0.00178545	0.00392303	0.00275045	0.000285558	0.00490165	0.004502	0.0100736	0.00335498	0.00173983	0.00289174	0.00375042	0.00284908	0.00497972	0.00612425	0.00591185	0.00379836	0.0179066	0.004908	0.00351744	0.00416145	0.00383246	0.00359785	0.00987336	2.54197e-05	0.0130993	0.00376332	0.00705205	0.00342647	0.00108807	0.00357533	0.00206114	0.00326681	0.00310904
ENSG00000142751	0.00793701	0.00457753	0.00297052	0.0143591	0.00212535	0.0239837	0.00875319	0.003673	0.00486438	0.00596699	0.00113026	0.00828644	0.00497805	0.00163275	0.00293866	0.0100484	0.0056372	0.00226985	0.0096116	0.00319844	0.00949827	0.0144927	0.0339173	0.00590216	0.00186734	0.00278989	0.00729807	0.00486716	0.0075462	0.00959602	0.00717466	0.00176741	0.00634307	0.0168465	0.00251306	0.00445906	0.00672697	0.00254282	0.00899515	0.00439879	0.0176458	0.00745867	0.00151649	0.00522526	2.54197e-05	0.00264945	0.00248329	0.00232871	0.00598354
ENSG00000198746	0.0935614	0.0361713	0.035293	0.0411468	0.00942251	0.0521928	0.0407488	0.0304145	2.54197e-05	0.0418062	0.0132866	0.0518817	0.0161641	2.54197e-05	2.54197e-05	0.0241986	0.0494927	0.0333758	0.0243803	0.0307549	0.0246968	0.0261547	0.0464843	0.00696892	0.0333028	2.54197e-05	0.0427206	0.0500566	2.54197e-05	0.043198	0.00921345	0.00931133	0.0300107	0.154645	0.0186205	0.0626466	0.0371315	0.0192145	0.0327153	0.0399031	0.0368965	0.0180496	0.0517058	0.0737899	0.0282949	0.027685	0.0336036	0.0401051	0.031724
ENSG00000090273	0.00502586	0.00233458	0.00688741	0.00459247	0.000956643	0.00716652	0.00777904	0.00507226	0.00506009	0.00528357	0.00141269	0.0102587	0.0048547	0.0121628	0.00147528	0.000524074	0.00314249	0.0043616	0.00379917	0.00322223	0.00484352	0.00271406	0.00286035	0.00372809	0.00400471	0.00303808	0.00682234	0.0115456	0.00651549	0.00534817	0.00486238	0.0125321	0.00646585	0.00910892	0.00336478	0.00455896	0.00608361	0.00227767	0.00225478	0.00666114	0.00508747	0.00720347	0.00108238	0.00495573	0.00598598	0.00322009	0.0091992	0.0087691	0.00360718
ENSG00000253368	0.0156306	0.00818402	0.0201255	2.54197e-05	0.00815237	2.54197e-05	0.00523759	0.0148384	0.00643684	0.0102717	0.107314	0.0426949	0.01932	0.0321525	0.035294	0.00952091	0.0256977	0.030506	0.0404258	2.54197e-05	0.00534265	0.00245023	0.0239034	0.0392962	0.011621	0.0126903	0.000557006	0.0299165	0.045397	0.000336339	0.0179318	2.54197e-05	0.0141999	0.0467121	0.0237826	0.0126507	0.0261319	0.00422078	0.00518435	0.0123821	0.00917241	0.0263747	0.0167053	0.0144999	0.0291617	0.00303975	0.0311809	0.0144626	2.54197e-05
ENSG00000158246	0.0147935	0.0103141	0.00982686	0.0497633	0.0458731	0.0612587	0.0599731	0.00969325	0.00782778	0.0178411	0.0561517	0.021875	0.00986529	0.00753241	0.000413592	0.011277	0.0194836	0.00522919	0.00908735	0.064169	0.0656485	0.0596567	0.0403232	0.00835178	0.00996655	0.0089565	0.0121636	0.0298168	0.028129	0.0153449	0.0086934	0.0286427	0.0156729	0.0475387	0.023321	0.0132097	0.0570909	0.0550927	0.0606205	0.0671808	0.0401145	0.0095779	0.0176111	0.0165026	0.00420786	0.0936555	0.0148669	0.0111222	5.3299e-05
ENSG00000090020	0.00675913	0.00766586	0.00359213	0.000364447	0.00157015	0.0117393	0.00396155	0.00326894	0.00537004	0.0139699	2.54197e-05	0.0100933	0.00962078	0.00754656	0.00785569	0.00286539	0.00942815	0.00733869	0.00344914	0.00296805	0.00102317	0.00950512	2.54197e-05	0.00738773	0.00798751	0.00103234	0.0234505	0.00500636	0.00319762	0.00801667	0.0086101	0.00638511	0.00791004	0.0071404	0.00464832	0.00210397	0.00795547	0.00360164	0.00268623	0.00254191	0.00572142	0.00353161	0.00249761	0.00628263	2.54197e-05	0.00303989	0.0110531	0.00395349	0.00730343
ENSG00000142784	0.00375619	0.0045346	0.0055578	0.0114322	0.000981127	0.00202576	0.00270193	0.00624942	0.00591883	0.00335353	0.0141923	0.00168521	0.00489034	0.00234476	0.0026733	0.0028514	0.00196235	0.00746683	0.00677491	0.00350117	0.00194802	0.000788761	0.00691824	0.00298454	0.00502999	0.00918848	0.000960726	0.0111929	0.00907849	0.0102061	0.00935904	0.00803605	0.00395064	0.00583451	0.00240168	0.00539574	0.000941505	0.00627712	0.00215934	0.00693821	0.00247006	0.00518574	0.00464706	0.0094486	2.54197e-05	0.00632386	0.00488966	0.00737537	0.0100757
ENSG00000186501	0.00349815	0.00345413	0.000862748	0.00187043	0.00112004	0.00228042	0.00173	0.00313823	0.00274968	0.00377614	0.000601322	0.00660001	0.00313478	0.00319888	0.00282435	0.00331536	0.00349478	0.003466	0.00376871	0.00314072	0.00185125	0.00312944	0.00227137	0.00373319	0.00274866	0.00334041	0.00504041	0.00278417	0.00267585	0.00268019	0.00344936	0.00190034	0.002261	0.00370222	0.00232121	0.00303914	0.00284829	0.000510624	0.00395302	0.00285261	0.00211951	0.00415823	0.00220823	0.00426354	0.00125638	0.00177564	0.0033004	0.0039269	0.00192596
ENSG00000142765	0.0178174	0.0083602	2.54197e-05	0.021925	0.0634214	0.0337702	0.0317406	0.0143684	0.0181808	0.0157725	0.0467232	0.00233101	0.00515351	0.00400281	0.00334658	0.00710109	0.00896525	0.00516141	0.00338956	0.0328493	0.0278126	0.00893364	0.0312192	0.00638483	0.0133706	0.0253522	0.0366639	0.0101932	0.018839	0.00720512	0.00585758	0.00330054	0.0174228	0.00574049	0.0161361	0.0391076	0.0230599	0.0535089	0.0266785	0.029269	0.0290942	0.00638235	0.00964404	0.00677053	2.54197e-05	0.0103151	0.00555524	0.00163355	0.0135551
ENSG00000142733	0.00983261	0.00567222	0.0230598	0.0235776	0.0194223	0.0471951	0.00807877	0.0204322	0.0108454	0.00469138	0.0418028	0.0114927	0.0137496	0.0241129	0.00461421	0.00341142	0.0103904	0.00865802	0.0080297	0.0130649	0.0173686	0.0143232	0.0242301	0.0128606	0.0154857	0.0178498	0.00920465	0.0172788	0.007738	0.00878855	0.0151268	0.00715095	0.00733278	0.0552471	0.0118652	0.00743095	0.0374565	0.0116429	0.0103429	0.00931803	0.0370474	0.0134504	0.00380061	0.00653627	0.00313293	0.00718721	0.0047086	0.00661834	0.00442231
ENSG00000142748	0.0484104	0.0723856	0.0661843	0.0782029	0.0673236	0.0827509	0.0802547	0.067855	0.0657137	0.0446182	0.226486	0.0478409	0.0740176	0.0534983	0.0633098	0.0638547	0.0470705	0.0565068	0.0354023	0.066912	0.074081	0.0595805	0.0795593	0.0619721	0.0590209	0.155027	0.021187	2.54197e-05	0.0816297	0.0546596	0.0757633	0.0394979	0.00449627	0.102758	0.0360568	0.0904145	0.0779265	0.0741917	0.0651587	0.0740455	0.064043	0.0566351	0.0367514	0.0109712	0.0673351	2.54197e-05	0.0558568	0.0581964	0.0561439
ENSG00000158195	0.00849066	0.00633664	0.000746	0.0107609	0.0142783	0.0119942	0.00480931	0.00815632	0.00641358	0.0086844	0.00682862	0.0072807	0.00636819	0.00793361	0.00729522	0.010929	0.00694108	0.00844935	0.00854672	0.00805425	0.00666136	0.00755217	0.0112813	0.00710212	0.00698732	0.00377889	0.00596556	0.0186664	0.00895067	0.0100872	0.00788263	0.00601828	0.00958269	0.00995284	0.00512724	0.00612709	0.00460608	0.00658309	0.0127088	0.00709746	0.00779776	0.00732695	0.00600057	0.00775462	0.00715738	0.0106611	0.00517277	0.00541811	0.00602564
ENSG00000126705	0.00679486	0.0132531	0.00188183	0.0228449	0.00732438	0.0225833	0.00813624	0.00980402	0.00787214	0.003809	0.0249929	0.00540829	0.00701484	0.00516576	0.012363	0.0117437	0.0184109	0.0113607	0.0122958	0.00722374	0.00920606	0.0129277	0.00382574	0.00561698	0.00516603	0.00422923	0.0074917	0.0194605	0.00877779	0.00691114	0.00845873	0.00885783	0.0065941	0.0519955	0.00648094	0.00381608	0.00954573	0.00485125	0.0103721	0.00874263	0.0200392	0.00640259	0.0108485	0.0138881	0.00728346	0.0113924	0.00655954	0.0161105	0.00930406
ENSG00000000938	0.0269253	0.0350674	0.0293938	0.042061	0.0643777	0.0424994	0.0415216	0.0664224	0.0377896	0.0463763	0.0903563	0.0354477	0.0491553	0.0296334	0.0448638	0.0290329	0.0264599	0.0210845	0.0120355	0.0437625	0.0439777	0.0422539	0.0330636	0.0564049	0.0440406	0.105296	0.0429342	0.0294173	0.0401101	0.0509759	0.0412877	0.0142497	0.0337687	0.0120763	0.0310542	0.0371867	0.0437303	0.0633132	0.0438457	0.0481164	0.0135126	0.0208379	0.0322287	0.00858036	0.0390487	0.0470684	0.031374	0.0222234	0.0244071
ENSG00000126709	0.00571559	0.00564682	0.00905012	0.000865692	2.54197e-05	0.00423196	0.00152851	0.00765932	0.0144714	0.0033375	0.00160164	2.54197e-05	0.00699193	0.00496912	0.00709829	0.00898695	0.00401451	0.00766972	0.00927026	0.00278028	0.00408685	0.00197507	0.0077999	0.00362887	0.00578735	0.00853022	0.00495774	0.00109101	0.00254037	0.00921485	0.00261263	0.0312233	0.00422486	0.0107088	0.0195315	0.00404149	0.00323442	2.54197e-05	0.00598819	0.00298856	0.013255	0.0272837	0.0179617	0.00880378	0.0141874	0.00232336	0.00128794	2.54197e-05	0.00650199
ENSG00000009780	0.0123077	0.00881774	0.00726262	0.00135897	0.025518	0.000779101	0.00710662	0.00945467	0.00362686	0.00352235	2.54197e-05	0.0166073	0.00934831	0.0078388	0.0118621	0.00565572	0.0238465	0.0075333	0.00816118	0.00392019	0.00340343	0.00978612	0.0480931	0.00509924	0.00854197	0.0070231	0.0129482	0.0259527	0.0107304	0.0279955	0.0105189	0.00261205	0.0135882	0.0553484	0.00692473	0.0140603	0.0108547	0.0285221	0.0274114	0.0152087	0.009851	0.0137465	0.0289131	0.0393908	0.0222373	0.0169315	0.00686988	0.0201635	0.0106541
ENSG00000117758	0.00640331	0.0104422	0.00531697	0.00363541	0.0010483	2.54197e-05	0.000352805	0.00791083	0.00528639	0.00861558	0.0112959	0.00500124	0.0184395	0.0105516	0.0102845	0.00579963	0.00660613	0.00418927	0.00552659	0.00435493	0.00314034	0.00178443	0.0110414	0.00415734	0.00386161	0.00550916	0.00715128	0.00890339	0.00845487	0.0114677	0.015466	0.0126238	0.0122907	0.015481	2.54197e-05	0.0103697	0.00114579	0.00690068	0.00235559	0.00376519	0.0065789	0.00772912	0.0066803	0.00996231	0.0186991	0.0042706	0.0170957	0.0132994	0.013745
ENSG00000117751	0.0134193	0.00619203	0.00700332	0.0188387	0.00385445	0.0192651	2.54197e-05	0.00872366	2.54197e-05	0.000347433	0.00012116	0.0176024	0.00554257	0.0152493	0.00621087	0.00326036	0.0163439	0.00243253	0.0177928	0.00442938	0.00403456	0.0401318	0.0252357	0.00320943	0.00345421	0.00104866	0.0140152	2.54197e-05	0.00459162	0.0283828	0.0176336	0.0196754	0.0104288	0.0242762	0.000172092	0.00740901	0.00642496	0.0173021	0.0160714	0.0291859	0.0433294	0.00172697	0.0204198	0.0118233	0.00262313	0.0106452	0.0031109	2.54197e-05	0.00649126
ENSG00000130775	0.011419	0.00923592	0.0156064	0.00733682	0.0303416	0.00474633	0.00692951	0.00987791	0.0128924	0.0121976	0.00967435	0.0218152	0.0107899	0.00826314	0.00270438	0.0111128	0.00949026	0.00929403	0.00998184	0.00348429	0.00645277	0.00798802	0.00489111	0.00989885	0.0127679	0.0157798	0.0151528	0.0154823	0.00700467	0.00864378	0.0169169	0.00643345	0.012219	0.00466052	0.00826632	0.0103472	0.0116826	0.0303488	0.0152839	0.00565569	0.00648186	0.00698639	0.00346939	0.00921831	0.00516777	0.00596391	0.00979176	0.0102621	0.00571165
ENSG00000117748	0.0177428	0.0202354	0.000948895	0.0282379	0.015696	0.0341022	0.0234918	0.0245162	0.0250269	0.0297069	0.00563342	0.0236306	0.0346046	0.00912354	0.0056341	0.0140718	0.0204336	0.0240189	0.0222692	0.0208625	0.041562	0.0253451	0.0219003	0.0173491	0.0206258	0.0209584	0.0438798	0.0178318	0.0188863	0.0355848	0.0312358	0.0120697	0.0214473	0.0529994	0.0222498	0.0254634	0.0339234	0.0164895	0.0296501	0.0252285	0.0247548	0.0148145	0.00865419	0.0188994	0.0160121	0.0416963	0.0150834	0.0113084	0.0107442
ENSG00000158156	0.0392606	0.0107336	0.0210842	0.00902106	0.0115303	0.0260697	0.0033553	0.00967815	0.0148887	0.0165739	0.0201534	0.0424916	0.0338543	0.00893183	0.000254503	0.000564481	0.0195362	0.04271	0.0362825	0.00133072	2.54197e-05	0.0292952	0.01596	0.0266654	0.0234874	0.0214603	0.0286232	0.00724578	0.0259944	0.0381878	0.113474	0.0169282	0.02301	0.0484543	0.0241757	0.0113178	0.0157074	0.0124863	0.0916025	0.016974	0.0931932	0.00291936	0.0062371	0.0364232	0.023793	0.0265669	0.00896067	0.0164444	0.0234832
ENSG00000158161	0.0174928	0.00719295	0.0109957	0.00585322	0.00692953	0.0171471	0.0069754	0.00706212	0.00905295	0.00678092	0.00449297	0.00954876	0.00688428	0.0097935	0.0038471	0.00237181	0.00684447	0.0145226	0.0102552	0.0071145	0.00682451	0.00940255	0.00534745	0.00565903	0.00836517	0.00267811	0.0100032	0.0205471	0.00952069	0.0135355	0.00703609	0.00547817	0.00797997	0.0356202	0.00124347	0.0138906	0.0130235	0.00811166	0.00612993	0.00808396	0.0262955	0.00393509	0.00340155	0.0125813	0.00121106	0.00564067	0.00718895	0.00503732	2.54197e-05
ENSG00000126698	0.0174053	0.0251667	0.00872246	0.00138004	0.00871848	0.0252656	0.0051992	0.0086377	0.00641141	0.011809	0.00475266	0.0118511	0.00984163	2.54197e-05	0.0075989	0.00923574	0.00563088	0.00616978	0.0106011	0.00640904	0.00365404	0.00104189	0.00865439	0.00443162	0.0118036	0.00914325	0.0116126	0.00837776	0.0086208	0.0111745	0.00647711	0.00234404	0.00990249	0.0469601	0.0115392	0.0125213	0.0148456	0.00403466	0.00909247	0.000610411	2.54197e-05	0.0161948	0.0018568	0.00900469	0.00516411	0.00507485	0.00333533	0.00659852	0.0137634
ENSG00000130770	0.0235327	0.0299025	0.025781	0.0249141	0.0510331	0.0304357	0.0248848	0.0308312	0.0275183	0.0288257	0.00489537	0.00417915	0.0102751	0.0160355	0.0117932	0.0260349	0.0170092	0.024201	0.0297281	0.0221254	0.0252027	0.0315084	0.0252845	0.0168663	0.0343623	0.0106927	0.0250846	0.00770917	0.0466665	0.0505958	0.0136152	0.0126299	0.0547162	0.0448491	0.0168308	0.0394899	0.0239452	0.0502286	0.023371	0.0289414	0.019781	0.00577741	0.010165	0.0236699	0.0510986	0.0802654	0.0278171	0.0220723	0.0423167
ENSG00000270605	0.400887	0.531967	0.653618	0.893867	0.893867	0.893867	0.893867	0.893867	0.893867	0.893867	0.103084	0.0448282	0.520975	0.206127	0.436273	0.825988	0.140384	0.295388	0.678628	0.893867	0.893867	0.893867	0.893867	0.353199	0.867447	0.315446	0.893867	0.244155	0.893867	0.893867	0.787021	0.0253638	0.893867	0.180431	0.151869	0.825506	0.893867	0.893867	0.930761	0.893867	0.893867	0.210448	0.25713	0.173923	0.893867	0.893867	0.432656	0.597559	0.893867
ENSG00000130766	0.0114318	0.012774	0.00719757	0.016003	0.00997689	0.0095349	2.54197e-05	0.0189147	0.00561826	0.0204171	0.00207492	0.0132667	0.0102467	2.54197e-05	0.0148447	0.0113499	0.0158536	2.54197e-05	0.0105031	0.0177588	0.0179923	0.0076816	0.0180806	0.00141416	0.000493641	0.00183293	0.0173759	0.00755298	0.0052727	0.0133936	0.0113729	0.00606352	0.00770592	0.0659851	0.00663262	0.00844234	0.00698574	0.00194712	0.00446276	0.0174642	0.0394627	0.00525035	0.0016749	0.00746934	0.00206263	0.00654872	0.00276203	0.00291924	0.000825021
ENSG00000204138	0.0194701	0.0207099	0.0175811	0.0311531	0.0148236	0.0306077	0.015746	0.0255396	0.0203904	0.0194474	0.0172681	0.00785707	0.00541618	0.0135004	0.0029265	0.00676801	0.0184973	0.0235563	0.0126634	0.0160508	0.0264419	0.0195927	0.0224314	0.010627	0.0225522	0.0115719	0.0100313	0.00490123	0.0212203	0.00948055	0.00685963	0.0262069	0.0121133	0.0377613	0.00346657	0.0284201	0.0219264	0.0225457	0.0262036	0.0172861	0.0215535	0.00234168	0.00648353	0.00913229	0.0250546	0.0115639	0.00165898	0.0130703	0.0193772
ENSG00000180198	0.0143574	0.0136758	0.00914393	0.0197814	0.0101493	0.0100114	0.00847978	0.0051561	0.0101462	0.00613785	0.00502654	0.0207997	0.00829337	0.00479969	0.00114263	0.00879875	0.0128482	0.0113893	0.015075	0.00715987	0.00842055	0.0229256	0.0074279	0.00752357	0.0110968	0.00535078	0.0134174	0.00885071	0.0115001	0.00950218	0.0130914	0.00292272	0.00770181	0.00974573	0.00922911	0.00808246	0.0082969	0.0115769	0.00270552	0.00592849	0.0195771	0.00873589	0.0114868	0.0111213	0.00882282	0.0128298	0.00479387	0.00577811	0.00665331
ENSG00000180098	0.0278598	0.0410302	0.00559502	0.0328141	0.0163097	0.0380413	0.018873	0.0279579	0.0192114	0.0262536	0.0212193	0.0454742	0.0385568	0.028853	0.0137961	0.0131797	0.0264991	0.0255156	0.0249331	0.0356428	0.00229839	0.00718537	0.0153616	0.0358057	0.0219454	0.0191466	0.0183351	0.0756264	0.0306921	0.0173298	0.0349556	0.0211513	0.0227444	0.0412096	0.00654367	0.0323522	0.0213955	0.0168485	0.0149384	0.0211134	0.0139191	0.0236685	0.0385865	0.0540158	0.0137285	0.018899	0.0325327	0.0360303	0.0215566
ENSG00000197989	0.0166074	0.0150163	2.54197e-05	0.0456629	0.00501558	0.0470039	0.0239191	0.0078808	0.00813319	0.0205953	0.00762192	0.0059746	0.0117438	0.0155157	0.0222993	0.00762267	0.00985013	0.0199617	0.0273219	0.0245438	0.0253424	0.033353	0.0433235	0.00833421	0.0177131	0.00234905	0.0151218	0.0382637	0.0144724	0.0110711	0.0166256	0.0107858	0.0160252	0.0361537	0.0131577	0.0192665	0.04032	0.0114577	0.00292825	0.0449879	0.030911	0.00710165	0.00351182	0.0146984	0.018311	0.00727024	0.00358873	0.00752589	0.0219642
ENSG00000273544	0.0810203	0.0268745	0.0498576	0.076953	0.0600227	0.0830227	0.0723782	0.0422133	0.0318615	0.0642865	0.0338675	0.0609507	0.0314598	0.0485164	0.0946997	0.0311164	0.0491618	0.0341573	0.068688	0.0848239	0.0852218	0.0806176	0.0945447	0.0393125	0.0766182	0.0593929	0.0376492	0.088897	0.0964542	0.0574577	0.0345761	0.0856901	0.0539878	0.0844249	0.0740766	0.0631251	0.0644836	0.0575368	0.073535	0.0910276	0.0779295	0.00504168	0.0106978	0.0517959	0.0533086	0.0187769	0.0244418	0.0359054	0.0427582
ENSG00000120656	0.0357589	0.0450295	0.0170016	0.020885	0.00490345	0.0162375	0.0153628	0.0224692	0.0149876	0.0523504	0.0086115	0.02437	0.0260065	0.0067877	2.54197e-05	0.0278922	0.026581	0.0145392	0.0274217	0.0110203	0.011294	0.0103662	0.026462	2.54197e-05	0.0231353	0.00906666	0.0119719	0.0325749	0.0380581	0.0198798	0.0212742	0.0188702	0.0220338	0.0259488	0.00951852	0.0227354	0.0108174	0.00107788	0.0104468	0.0113226	0.017114	0.024576	0.0264393	0.017867	0.0248574	0.0103959	2.54197e-05	0.0373548	0.0242906
ENSG00000188060	0.0386109	0.0313457	0.0299701	0.0396306	0.0395512	0.0410348	0.0420805	0.0328386	0.0336102	0.0372259	0.0169802	0.0460055	0.0390113	0.028578	0.0268189	0.0290304	0.0262501	0.0313694	0.0247078	0.0394218	0.04416	0.0405306	0.036479	0.0278935	0.0339924	0.00762039	0.0459238	0.0443406	0.0342303	0.0360555	0.0391352	0.0242634	0.0352603	0.052113	0.0356267	0.0466491	0.0446658	0.0432801	0.0483023	0.0476704	0.0323588	0.0392635	0.0397648	0.0267084	0.0400577	0.0440392	0.0293927	0.0384523	0.0297317
ENSG00000162419	0.0176622	0.0233672	0.0226311	0.0241595	0.0113891	0.0256992	0.0128669	0.0236763	0.0240249	0.0295076	0.0215999	0.0254649	0.0248801	0.0201556	0.00967481	0.0187795	0.00653938	0.0240574	0.0282897	0.0123782	0.0184961	0.0121751	0.025687	0.0218978	0.0247239	0.0129227	0.0381263	0.0258758	0.0113065	0.0213849	0.0434339	0.0198618	0.0323876	0.0363103	0.0223994	0.0510894	0.02338	0.00566126	0.021442	0.0182478	0.0225362	0.0214714	0.0228717	0.010868	0.0171781	0.0105898	0.0260967	0.0228698	0.0104395
ENSG00000198492	0.0109403	0.0154795	0.0132649	0.0189702	0.012973	0.0194256	0.0194491	0.0184288	0.0134523	0.0186226	0.0032879	0.0314748	0.0198531	0.015843	0.000184086	0.0426158	0.024699	0.0189622	0.0190793	0.0187056	0.0182194	0.0180392	0.0282228	0.00443098	0.0099167	0.00666555	0.0279698	0.0163065	0.0197511	0.0140199	0.017301	0.0288994	0.00696485	0.0740216	0.00519534	0.0424683	0.0180853	0.0165042	0.0167735	0.0185819	0.0252709	0.00931063	0.0221877	0.0235827	2.54197e-05	0.0147218	0.00158057	0.0162781	0.00879725
ENSG00000159023	0.00972882	0.00572007	0.00529609	0.0358255	0.0112834	0.028568	0.00528212	0.0084383	0.00411435	0.00905987	0.00393049	0.00576368	0.0022031	0.001676	0.00340451	0.00338881	0.00790375	0.00959275	0.00547462	0.00450607	0.00673854	0.00636983	0.00616244	0.00459423	0.00823474	0.027145	0.0107807	0.00408286	0.00885638	0.00482211	0.00268082	0.00242423	0.0049972	0.00381542	0.00523712	0.00754426	0.0124613	0.00958434	0.00962237	0.00741478	0.014056	0.00323528	0.00289145	0.00594918	0.00756491	0.00413581	0.0022764	0.00207353	0.00368274
ENSG00000253304	0.0075088	0.00569025	0.0069406	0.0176492	0.0153089	0.0193554	0.00787492	0.00363155	0.00970581	0.00432971	0.080497	0.0154546	0.0229727	0.0104777	0.00822113	0.00423952	0.00921247	0.00412177	0.0130911	0.0104411	0.00736042	0.0184316	0.0177137	0.00354325	0.0056373	0.005889	0.030595	0.0385266	0.00569729	0.00406441	0.0206736	0.00412491	0.00484203	0.0420585	0.0296504	0.00476253	0.0168792	0.00859073	0.0186252	0.0280584	0.0167916	0.0188711	0.0144317	0.00777835	0.00497633	0.0205692	2.54197e-05	0.0146287	0.00342749
ENSG00000116350	0.00103018	0.00132617	0.000311371	0.00302162	0.0020353	0.0024246	0.00122375	0.000763211	0.00158163	0.000698868	0.000522869	0.00287964	0.00156511	0.000990062	0.00076095	0.00131747	0.00129613	0.00157805	0.00135845	0.000835372	0.0011185	0.000854948	0.00327545	0.000830527	0.0013799	0.000589734	0.00131601	0.00307653	0.00164065	0.00164963	0.00198466	0.00227481	0.00126646	0.00228817	0.000417235	0.00226626	0.001443	0.000445899	0.00149446	0.00176843	0.00178091	0.000995303	2.54197e-05	0.00160138	0.000418165	0.00180942	0.000794367	0.000859175	0.000964165
ENSG00000277916	0.0249068	0.0378228	0.0296888	0.0618905	0.0374624	0.061302	0.163943	0.0125025	0.0337672	0.0465784	0.00132739	0.0361246	0.039127	0.0302892	0.039261	0.0348732	0.0384033	0.0367241	0.0260198	0.0574764	0.0551352	0.0549031	0.0606573	0.0271408	0.0317288	0.0325489	0.0555758	0.0415501	0.0285527	0.0344005	0.0438847	0.0364588	0.0403916	0.0645615	0.036214	0.0467478	0.0555356	0.0301064	0.0542327	0.0653192	0.0523294	0.0423031	0.0454602	0.016616	0.0325514	0.0291209	0.0316214	0.0264684	0.0292437
ENSG00000116353	0.00446189	0.00384203	0.0133166	0.00701362	0.0102546	0.00581392	0.0077528	0.00733247	0.00634829	0.00369316	0.00561753	0.00740635	0.00502185	0.0098386	0.00629766	0.00595695	0.0058511	0.0124644	0.00517935	0.00465349	0.000257791	0.00421347	0.00830381	0.00697585	0.00290048	0.00603955	0.00582156	0.00289648	0.0130661	0.0103488	0.0108353	0.0110097	0.00992002	0.0580406	0.0103786	0.0113041	0.000475173	0.0060693	0.00548378	0.00736634	0.00819197	0.00701477	0.00992287	0.010475	0.0052916	0.00875089	0.00514772	0.0141032	0.00491979
ENSG00000060656	0.00594066	0.00287788	0.00769224	0.00801824	0.0301823	0.00635853	0.00634985	0.0195389	0.00451626	0.0134349	0.0400067	0.00581515	0.0073252	0.0188643	0.002698	0.00257046	0.0075676	0.00593156	0.00652035	0.0117142	0.00138423	0.00131462	0.00816886	0.017608	0.00914994	0.0146387	0.0113708	0.00320711	0.00264915	0.00276631	0.00518871	0.0104692	0.00703513	0.0266735	0.0188201	0.00585432	0.0077425	0.0251879	0.0105131	0.0133797	0.0424633	0.0115722	0.0275483	0.0068998	0.00450051	0.0128695	0.000951693	0.00420691	0.00943558
ENSG00000186056	0.0301228	0.0314662	0.0159569	0.0823115	0.0425105	0.041708	0.0620466	0.0166108	0.0275255	0.0382881	0.00551345	0.0223901	0.00615964	0.00730016	0.0206087	0.00462172	0.0274338	0.0332349	0.0100128	0.070407	0.0754678	0.063669	0.0670499	0.0100051	0.0251473	0.0365435	0.0513906	0.0272295	0.0239824	0.0233933	0.0189465	0.00446885	0.0206379	0.0320214	0.0264896	0.045506	0.0755058	0.0420824	0.0717468	0.0757312	0.0551344	0.0365616	0.0277825	0.0196265	0.0132506	0.0203157	0.0176995	0.0105433	0.00281995
ENSG00000162511	0.00544437	0.00298214	0.000406561	0.00826433	0.0107273	0.0176181	0.0039952	0.00390012	0.00300998	0.00215029	0.00784153	0.00182259	0.00474043	0.00196328	0.00634034	0.0034989	0.00354913	0.00300371	0.00705385	0.00117674	0.00767257	0.00259701	0.00170352	0.00358511	0.00520284	0.196801	0.00745721	0.00402134	0.00481018	0.00361671	0.00502112	0.00230409	0.00511195	0.00230251	0.00254446	0.00499188	0.00685389	0.0226854	0.00126066	0.00125322	0.00246955	0.00272884	0.00434411	0.00206883	0.0276715	0.00676098	0.00167861	0.0018098	0.0123144
ENSG00000162512	0.00642271	0.021982	0.0068054	0.00242657	0.00114705	0.00298296	0.00162384	0.00355385	0.00322321	0.00391001	0.141839	0.010942	0.00663149	0.00311252	0.00400953	0.00588499	0.00450017	0.0118622	0.00486598	0.00256952	0.00306019	0.00161093	0.00208512	0.00356574	0.00492339	0.00580882	0.00688769	0.00835419	0.00383545	0.00286012	0.00615637	0.00563856	0.006373	0.0420401	0.00462071	0.0373431	0.00208716	0.00340356	0.0019463	0.00223859	0.00116053	0.0064169	0.00596965	0.0060201	0.00615249	0.00597295	0.00699776	0.00479586	0.00727515
ENSG00000134644	0.0034841	0.00336421	2.54197e-05	0.00628693	0.00280675	0.00124102	2.54197e-05	0.00265866	0.00203483	0.00403119	0.00245844	0.00649718	0.00276412	0.00143386	0.00346202	0.00160802	0.00369059	0.00595919	0.00508196	0.00307776	0.00528549	0.00524741	2.54197e-05	0.00251493	0.00273802	0.00151042	0.00236333	0.00272181	0.00518324	0.00672395	0.00264144	0.0013879	0.00253294	0.0113757	0.00069785	0.00228903	0.00511396	0.00456955	0.000769789	0.00312804	0.00837983	0.00275074	0.00834532	0.00630841	0.00190297	0.00501017	0.00170428	0.00609696	0.00137411
ENSG00000060688	0.00636048	0.00470553	2.54197e-05	0.0129517	0.00524076	0.00995266	0.00565474	0.00637353	0.00270566	0.00344051	0.00114665	0.00631768	0.00893806	0.00408971	0.00132618	0.00548214	0.00459994	0.00726031	0.00621106	0.00245088	0.00587358	0.00905983	0.00878387	0.00148014	0.00427644	0.00228048	0.0044591	0.00712617	0.00759709	0.00600749	0.00855159	0.00306575	0.00624337	0.00945781	0.00485035	0.00728005	0.00319224	0.00631034	0.0053063	0.00965729	0.00742984	0.00219902	0.00999265	0.00684492	0.00217045	0.00422934	0.00743375	0.00441038	0.00110485
ENSG00000121766	0.00274823	0.00191852	2.54197e-05	0.00406653	0.00296139	0.00280446	0.00451499	0.00362311	0.00262242	0.00954857	0.00114797	0.00276607	0.00320334	0.000789524	0.000672188	0.0024544	0.00243355	0.00375937	0.00284544	0.00110336	0.00117784	0.00264418	0.00249355	0.00259241	0.0018799	0.00102934	0.00940478	0.0042238	0.00308545	0.00329104	0.00398766	0.00284373	0.00428854	0.00978304	0.00224434	0.00111483	0.00232712	0.00101503	0.00165144	0.00318631	0.00479134	0.00169878	0.00448668	0.00234117	0.00174633	0.00371938	0.0036343	0.00391288	0.000466651
ENSG00000121769	0.0165397	0.0197841	0.0346356	0.0176219	0.00403651	0.0225872	0.00308242	0.044632	0.0335696	0.00829641	0.0418249	0.0572053	0.0670955	0.122087	0.00972356	0.077505	0.0535277	0.0790973	0.0537861	0.00522372	0.00860316	0.0120553	0.0182325	0.0345782	0.0319724	0.0371019	0.00598865	0.0495002	0.0301586	0.00105334	0.0956256	0.0170805	0.0491987	0.0712689	0.0454889	0.017407	0.032963	0.0043287	0.00990168	0.0169905	0.00515461	0.0701132	0.0220479	0.0464497	0.0145325	0.0451502	0.026814	0.00981537	0.0382343
ENSG00000168528	0.11988	0.154186	0.0254822	0.0947341	0.1014	0.0933739	0.105843	0.0200065	0.139522	0.0699064	0.0860051	0.0391188	0.0589157	0.00496582	0.0126028	0.0626375	0.110015	0.142341	0.0351791	0.13786	0.153474	0.117111	0.0738277	0.0203348	0.139372	0.322537	0.111978	0.0309979	0.141499	0.0255871	0.0532515	0.159062	0.0236594	0.367774	0.044012	0.200678	0.095347	0.0880502	0.10822	0.142429	0.100252	0.0482044	0.0225516	0.031589	0.122214	0.0299926	0.0179248	0.00979205	0.135757
ENSG00000142910	0.00301414	0.00242327	0.00960822	0.0307502	0.0171008	0.0611735	0.00819314	0.00339897	0.00190045	0.0024911	0.0456093	0.00708277	0.00533059	0.00656773	0.0060328	0.00571523	0.00463158	0.00110507	0.00470223	0.00124827	0.0135277	0.0248447	0.00882794	0.00347051	0.00391253	0.00926967	0.00249629	0.000332916	0.0061745	0.00199582	0.00970701	0.00392556	0.00525332	0.0236816	0.011649	0.00277292	0.00593485	0.016605	0.0121261	0.0166098	2.54197e-05	0.0111372	0.00420957	0.0051113	0.00409353	0.00869043	0.00446906	0.00384335	0.00357046
ENSG00000121764	0.00126899	0.00189708	0.000415402	0.000231215	0.000631066	0.00375769	2.54197e-05	0.000974181	0.00103478	0.000155519	2.54197e-05	0.00381657	0.000945095	0.000359252	0.00226491	0.00132804	0.0038127	0.00149105	0.0012868	0.00112632	0.00179803	0.00188784	0.00585161	0.00151619	0.000291842	0.000654062	0.0020936	0.000736848	0.00106142	0.00220762	0.00219897	0.000764281	0.000589261	0.00322782	0.00025316	0.00116728	0.00024072	0.00238216	0.00194973	0.000722497	0.0038978	0.00073145	0.00194351	0.00192693	0.001478	0.00233	0.00217334	0.00144294	0.00127735
ENSG00000162517	0.00147271	0.00159605	0.000273829	0.00015128	0.000885057	0.00308744	2.54197e-05	0.00101269	0.00119653	0.000386926	2.54197e-05	0.0044499	0.00113515	0.000619328	0.00255119	0.00148564	0.00398288	0.00186262	0.00182198	0.00133177	0.00178826	0.00201365	0.00580625	0.00153533	0.000465804	0.000928451	0.00238156	0.000827838	0.00155465	0.00292652	0.00194693	0.000911834	0.000648134	0.00352331	0.00024623	0.00104551	0.000209287	0.002434	0.00217534	0.000889279	0.00380703	0.00077141	0.00115835	0.00189729	0.00235565	0.00193111	0.00192602	0.00181834	0.000585377
ENSG00000235790	0.0166044	0.0203441	0.0138898	0.0152643	0.0621581	0.01734	0.0371765	0.0134779	0.0179118	0.0216683	0.0578749	0.0348011	0.0123304	0.0264681	0.00857682	0.0152987	0.022305	0.0246197	0.0219076	0.0243172	0.0242323	0.0393969	0.0341946	0.026257	0.0197251	0.0113527	0.0623039	0.034226	0.0113357	0.0208775	0.0140154	0.0299251	0.0147424	0.0645424	0.0211124	0.023956	0.0349299	0.0572828	0.0367338	0.0344123	0.0233234	0.0338729	0.0290667	0.0128377	0.0154869	0.0286897	2.54197e-05	0.0192354	0.0167979
ENSG00000084636	0.00575146	0.00558822	0.0016813	0.0160597	0.0500468	0.0197756	0.0224644	0.00388991	0.00378168	0.0036283	0.0942841	0.0197182	0.0046652	0.00552073	0.00568061	0.00240693	0.00476182	0.00577065	0.00412751	0.0188762	0.013187	0.0140598	0.0169459	0.00337326	0.00508311	0.00404185	0.00842508	0.0123564	0.00360796	0.00430219	0.00505553	0.0105779	0.00655967	0.0252117	0.00515759	0.00538549	0.0144816	0.0547236	0.0186736	0.013732	0.0158902	0.00522269	0.00802579	0.00480764	0.0058138	0.00906019	0.00315077	0.00626339	0.00206035
ENSG00000121753	0.0271724	0.0223944	0.0151177	0.00373448	0.0140904	0.00458037	0.00564701	0.0141468	0.0173727	0.00722037	0.103937	0.0675902	0.0304418	0.0300425	0.00660992	0.0130489	0.0138966	0.0120036	0.0177886	0.00448479	0.00535484	0.00695503	0.00525078	0.0315053	0.0158282	0.0232114	0.0147048	0.0663342	0.015937	0.023055	0.0425048	0.0184681	0.0951024	0.0368681	0.0210142	0.025926	0.00675352	0.0126259	0.00512553	0.00431553	0.00874589	0.0624976	0.042313	0.0395695	0.00360956	0.00618962	0.0507514	0.0249446	0.00683792
ENSG00000254545	0.0260541	0.027157	NA	NA	NA	NA	NA	NA	NA	NA	NA	NA	NA	NA	0.00201521	NA	0.0309971	NA	0.149076	NA	NA	0.0340362	NA	NA	NA	0.020505	NA	NA	0.0502796	NA	NA	NA	NA	0.0830335	NA	0.141931	NA	NA	NA	NA	NA	NA	NA	0.0177347	NA	0.16397	NA	NA	NA
ENSG00000134668	0.02316	0.0315669	0.0557831	0.0753089	0.108489	0.0732391	0.0729063	0.11529	0.155712	0.148057	0.201663	0.113007	0.0950681	0.0550027	0.00640455	0.0759175	0.0451582	0.135186	0.133843	0.0729024	0.0967473	0.0259991	0.0686545	0.0756221	0.138314	0.0381048	0.160026	0.0992959	0.0915492	0.0849659	0.119769	0.043364	0.0794394	0.121159	0.0794326	0.215591	0.0897368	0.0944051	0.00394659	0.0719115	0.0631186	0.0886041	0.0942827	0.0151412	0.121249	0.111049	0.092462	0.0573601	0.0765187
ENSG00000269967	0.00255764	0.00464861	0.00550287	0.00282243	0.00208155	0.00222932	0.00101356	0.00105988	0.00256261	0.00178604	0.00197311	0.00701222	0.00800472	0.00490852	0.000303964	0.00132366	0.00311754	0.0015935	0.00354135	0.00240988	0.00188727	0.808918	0.00159775	0.00285081	0.00191878	0.00137326	0.00263546	0.00464704	0.00205083	0.00349446	0.0066579	0.000831637	0.00589383	0.00578396	0.00405134	0.00170627	0.00182869	0.00280028	0.00231339	0.00267857	0.00365517	0.00176788	0.00437874	0.00215414	0.00123353	0.00168095	0.00268107	0.00294291	0.00768063
ENSG00000184007	0.00241234	0.00480921	0.00610079	0.00196022	0.00196496	0.00203684	0.000723192	0.000783499	0.00269578	0.00194613	0.00238798	0.00648485	0.00783985	0.00473387	0.000787336	0.00287381	0.0032703	0.00177554	0.00359804	0.00222917	0.00223221	0.00311552	0.00137038	0.00332856	0.00234872	0.00140123	0.00302626	0.00471806	0.00238725	0.00323331	0.0081637	0.00133351	0.00559321	0.00610952	0.00393005	0.00170637	0.00141162	0.00158476	0.00207806	0.00102233	0.00308569	0.00202561	0.00436429	0.00297893	0.00116516	0.00227453	0.00329216	0.00306019	0.00564847
ENSG00000121774	0.0146244	0.024575	0.0160955	0.00665976	0.00207981	0.00681397	0.00667169	0.035777	0.00252258	0.00480377	0.00393054	0.022457	0.00811531	2.54197e-05	0.00334735	0.0306768	0.00838619	0.00885944	0.00943894	2.54197e-05	0.00168934	0.00576363	0.00621876	2.54197e-05	0.034056	2.54197e-05	0.00630451	0.0314319	0.0168441	0.0250523	0.0281624	0.00717106	0.00963803	0.032376	0.00235308	0.00531139	0.000347597	2.54197e-05	2.54197e-05	2.54197e-05	0.0276411	0.00469447	0.0158798	0.0125835	2.54197e-05	0.0109838	2.54197e-05	0.00525518	0.000624961
ENSG00000203325	0.0950265	0.0756017	0.0883477	0.10879	0.0894686	0.105257	0.108676	0.089824	0.0917462	0.104431	0.0959538	0.12185	0.0813512	0.0989935	0.0777327	0.0754021	0.0900899	0.0857829	0.0809384	0.108819	0.107885	0.102757	0.107368	0.0986226	0.0925519	0.105875	0.131362	0.114877	0.0734561	0.0795052	0.0790199	0.0939162	0.0739768	0.110696	0.108589	0.0856386	0.0992847	0.0915607	0.107195	0.105818	0.0974551	0.0974767	0.106729	0.0440592	0.0730767	0.0881325	0.0944285	0.110493	0.0800984
ENSG00000121775	0.00766075	0.00653434	0.00783084	0.00295243	0.00394054	0.00722397	2.54197e-05	0.0067197	0.00630778	0.00509766	0.0085474	0.0168073	0.00651058	0.00467247	0.00159269	0.00701781	0.00878018	0.0190855	0.00922588	0.0144169	0.00803412	0.0183731	0.00765973	0.00882379	0.0108035	0.00589486	0.00904083	2.54197e-05	0.0178775	0.00649786	0.0148877	0.00817596	0.00898717	0.0216681	0.00543031	0.00897715	0.00848686	0.00805069	0.00846013	0.0103038	0.014982	0.00414856	0.0146797	0.00897875	0.00123486	9.27856e-05	0.00466848	0.0069818	0.0058541
ENSG00000025800	0.0121926	0.00825287	2.54197e-05	0.0426939	0.00280544	0.017644	0.0318491	0.0056572	0.00616477	0.01005	0.00557539	0.0113812	0.00456176	2.54197e-05	0.00321978	0.00262967	0.0087285	0.00543801	0.0144238	0.0138502	0.0170296	0.0142354	0.0103164	0.00999978	0.00357332	0.0026835	0.00856358	0.0124333	0.0109191	0.00584016	0.0133732	0.00584493	0.0093375	0.0190372	0.00824409	0.00688725	0.0231539	0.00251924	0.00799758	0.010065	0.0172986	0.0042888	0.0241894	0.00855407	0.00557087	0.0104627	0.0069722	0.00549041	0.00200418
ENSG00000084652	0.00615273	0.00399257	0.00394766	2.54197e-05	0.0103585	0.0131236	0.00183231	0.000332579	0.00433296	0.00620684	0.00412104	0.0156121	0.0061037	0.0146076	0.000588588	0.00229965	0.00431935	0.0109677	0.0054787	0.00436807	0.00293236	2.54197e-05	0.0199665	0.00475985	0.00549275	0.00445555	0.00223382	0.00081878	0.011098	0.00563374	0.0113559	0.0052046	0.00518569	0.0131179	0.00289817	0.00372603	0.00449321	0.00988533	0.00598582	0.00292691	0.00812277	0.00183414	0.00474214	0.00842182	0.00698065	0.0052474	0.00157876	0.00852693	0.011269
ENSG00000222046	0.0448499	0.0341874	0.04569	0.0287068	0.0212178	0.0240623	0.0294861	0.0855304	0.0425103	0.0534168	0.0148678	0.0318072	0.0341439	0.0284439	0.0109212	2.54197e-05	0.0144487	0.00275878	0.0651678	0.0268762	0.00712378	0.0251834	0.0194282	0.0102066	0.0169427	2.54197e-05	0.0466783	0.0491445	0.0196551	2.54197e-05	0.0454509	0.00807548	0.0210701	0.0257166	0.0300391	0.0434256	0.0273902	0.0193272	0.025649	2.54197e-05	0.0248222	0.0118683	0.0286758	0.0131081	0.00788939	0.0246341	0.00996605	0.0341115	0.000969849
ENSG00000160055	0.0458504	0.0287556	0.0217511	0.028435	0.0219961	0.0708162	0.033329	0.035309	0.0328762	0.0327736	0.0220186	0.0122998	0.019242	0.0178738	0.00376011	0.00364838	0.0140348	0.00511092	0.0324583	0.0208469	0.014885	2.54197e-05	0.0212682	0.00767661	0.00573452	0.00501514	0.0207654	0.0290664	0.0170976	0.01639	0.0522667	0.0012394	0.00889808	0.0266714	0.0194702	0.0239535	0.0274856	0.0151464	0.0459319	0.00700947	0.0213482	0.00393123	0.00956801	0.0159098	0.0032931	0.0120928	0.0204541	0.00843717	0.00622308
ENSG00000084623	0.0139167	0.00939966	0.024448	0.0120321	0.0108772	0.0238901	0.00949298	0.00854763	0.0105809	0.0112243	0.0167689	0.00597053	0.0123603	0.0144604	0.012518	0.0117015	0.0132081	0.0113466	0.0116774	0.0191663	0.0106895	0.0166193	0.0210202	0.0144228	0.0104287	0.016127	0.0182435	0.013585	0.00993008	0.0102752	0.00887206	0.010536	0.0111994	0.0128132	0.0113276	0.0133919	0.0093261	0.0127935	0.0136625	0.0076791	0.0186999	0.0162046	0.00748952	0.00784414	0.00976765	0.00481712	0.00559376	0.00981996	0.00881888
ENSG00000220785	0.00852169	0.00827297	0.0107731	0.014129	0.0505066	0.0298157	0.0155949	0.0116976	0.00914254	0.0074671	0.18755	0.00316068	0.0089378	0.0194819	0.00935052	0.00966665	0.020336	0.0105735	0.00897949	0.0212994	0.0261244	0.0205466	0.00573867	0.0165825	0.00844671	0.0216834	0.00975199	0.00185414	0.0191895	0.00814339	0.0170375	0.0200612	0.0111719	0.42091	0.00623002	0.0133959	0.015171	0.0448629	0.0262236	0.0205189	0.0359985	0.0122738	0.0206123	0.0179845	0.00458987	0.0107086	0.00773517	0.00860487	0.00496278
ENSG00000183615	0.0917771	0.0576662	0.0546938	0.0904053	0.095709	0.0924521	0.0966879	0.0577886	0.0941852	0.121098	0.176896	0.0927612	0.116395	0.122946	0.12073	0.0844638	0.10143	0.11769	0.076145	0.0943322	0.102355	0.0796673	0.109926	0.0449913	0.0226324	0.109769	0.12857	0.115476	0.0853806	0.0520235	0.136569	0.141654	0.0737949	0.219606	0.0814429	0.0673914	0.0867781	0.121553	0.0928972	0.0870796	0.0797015	0.0826971	0.0775278	0.0730336	0.10082	0.026857	0.0798318	0.068007	0.0639489
ENSG00000116478	0.0163983	0.019853	0.00871914	0.022136	0.0329892	0.0160095	0.0205027	0.00378517	0.0156869	0.0215205	0.0096171	0.00344706	0.024204	0.00452444	0.00384549	0.0243343	0.00279459	0.0223679	0.00488948	0.0156245	0.0209268	0.0443761	0.0216217	0.00598124	0.0156456	0.00925422	0.0236128	0.0048459	0.0240908	0.0139585	0.0119615	0.011292	0.0121969	0.0260469	0.0151211	0.0197715	0.0192312	0.0361396	0.0201518	0.0193192	2.54197e-05	0.00587047	0.0379042	0.00907059	0.034149	0.0120425	0.0160535	0.00860707	0.0190848
ENSG00000175130	0.0159864	0.0123673	0.00729928	0.00426823	0.00707753	0.00527485	0.0045821	2.54197e-05	0.0156303	0.00362615	0.00749324	0.0152519	0.00487941	0.00836216	0.00654771	0.00642532	0.00336781	0.00898942	0.00557042	0.00564826	0.00537718	0.00415241	0.00489131	0.0138678	0.0113425	0.0133821	0.0283175	0.0131363	0.00709226	0.0180539	0.00428675	0.0163383	0.00955531	0.00559903	0.00928287	0.014478	0.00589877	0.0071788	0.00598408	0.00556944	0.0039407	0.00913813	0.0142275	0.0168109	0.00481665	0.014819	0.00801202	0.00414189	0.00534022
ENSG00000162526	0.0180066	0.0163741	0.00883789	0.0125109	0.00245201	0.0142179	0.0103264	0.00676062	0.00824949	0.00763108	0.013282	0.00591495	0.000457654	0.00818689	0.00360855	0.000463034	0.020224	0.00548202	0.00502396	0.00105776	0.0082054	0.00841486	0.0151692	0.0144363	0.0118824	2.54197e-05	2.54197e-05	0.0120402	0.0183208	0.0356803	0.0244142	0.00901631	0.00874146	0.0165286	0.0109354	0.020443	0.00839693	0.00705142	0.00805793	0.00318274	0.011432	0.0149831	2.54197e-05	0.00653664	0.00122081	0.0133512	0.00525404	0.0105105	0.00656576
ENSG00000160058	0.00237135	0.00515118	2.54197e-05	0.00387804	0.00153771	0.00367292	0.000402551	0.00237462	0.00253179	0.00253203	0.0034459	0.00168049	0.00169177	0.00366952	0.00135088	0.00339531	0.00252802	0.00149241	0.00215774	0.00116912	0.00196778	0.00310791	0.00426525	0.00195575	0.00302861	0.00329084	0.00332244	0.00095476	0.00185512	0.00169393	0.00406509	0.00247862	0.00251014	0.00320048	0.00136902	0.00364363	0.00136155	0.00218574	0.00063004	0.00228255	0.00453438	0.00270172	0.000426435	0.00240415	0.00322953	0.00153985	0.0013536	0.00169373	0.0039033
ENSG00000160062	0.0433478	0.0384789	0.0323244	0.0649749	0.0395049	0.0734897	0.0512656	0.07182	0.0264862	0.0519206	0.0556895	0.0382158	0.0387965	0.032796	0.0158821	0.025466	0.0388493	0.028664	0.0404503	0.0598833	0.0604055	0.0599496	0.0514743	0.0241376	0.013601	0.013655	0.0493716	0.0472281	0.0450993	0.0544051	0.0738204	0.0474458	0.0189147	0.111226	0.0340418	0.0477607	0.0641232	0.0636036	0.0463144	0.0662934	0.0530918	0.0446872	0.0463004	0.0210603	0.0256158	0.0420909	0.0297472	0.0285388	0.0243785
ENSG00000176261	0.006081	0.0057272	0.0096689	0.00532105	0.00784696	0.00313939	0.00196401	0.014572	0.00908625	0.00318312	0.0066929	0.0158597	0.011121	0.00745086	0.00485577	0.00667426	0.0139569	0.0125581	0.0105307	0.00935076	0.0102084	0.0108878	0.00997787	0.00573665	0.00871681	0.00580214	0.00636035	2.54197e-05	0.00772616	0.00889309	0.00903554	0.0124168	0.013186	0.0751425	0.00263961	0.00752913	0.0125836	0.00401532	0.00841686	0.0149045	0.0139383	0.00734727	0.00142228	0.01917	0.0144993	0.0174575	0.0162301	0.00886686	0.00299197
ENSG00000162521	0.00535019	0.00417222	2.54197e-05	0.00329452	0.0115484	0.00647524	0.00299486	0.00470776	0.00450172	0.00675213	0.00172046	0.00191993	0.00449457	0.00395381	0.00267	0.000809009	0.00380918	0.00393192	0.00359906	0.00187162	0.00149679	0.00294042	0.00289465	0.00301409	0.00394043	0.00356025	0.00361459	0.0037681	0.00349584	0.00295056	0.00277448	0.00330861	0.00250517	0.00948722	0.00307167	0.00428136	0.00327127	0.00305706	0.00230009	0.00304804	0.00418057	0.00254432	0.00482629	0.00367125	0.00180534	0.00187901	0.00443575	0.00393645	0.00151454
ENSG00000162520	0.101023	0.0138668	0.0285036	0.0250061	0.027464	0.0274401	0.0274737	0.013732	0.00824257	0.00374401	0.176927	0.0601158	0.0825695	0.0115418	0.00386733	2.54197e-05	0.104883	0.0092531	0.106691	0.0253746	0.0270763	0.02478	0.0434176	0.011671	0.0140256	0.0593806	0.0360462	0.149963	0.0355221	0.0139928	0.0322021	0.101792	0.0178616	0.232537	0.0542309	0.0117414	0.023873	0.032655	0.0245809	0.00989277	0.0238473	0.0351623	0.0844938	0.0174059	0.0432364	0.0588459	0.0226875	0.0294075	0.0168028
ENSG00000162522	0.00771537	0.0133425	2.54197e-05	0.00603946	0.00809247	0.00772908	0.00583399	0.00736998	0.00276612	0.00496959	0.0241496	0.00186497	0.00154155	0.00186714	0.0218786	0.00224724	0.00533757	0.0195632	0.00100589	0.0105751	0.00134501	0.00648577	0.0307405	0.00190631	0.00499682	0.0111503	0.00758044	0.0148121	0.0100791	0.000912382	0.00147685	0.00713396	0.00213713	0.0107956	0.00606957	0.0233244	0.00922006	0.0291618	0.00725711	2.54197e-05	0.0332053	0.0017206	0.00189132	0.00462952	0.00729306	0.00755734	0.00049197	0.00176376	0.00651697
ENSG00000134684	0.00596734	0.00796217	0.0122331	0.00552018	0.00275268	0.00749003	0.0024392	0.00623931	0.00596719	0.00511868	0.00257311	0.00642613	0.00405093	0.00758814	0.000710407	0.00131922	0.00805935	0.00736492	0.00745576	0.0036756	0.00257119	0.00141027	0.00706159	0.00477763	0.00509515	0.00654687	0.00745359	0.00687039	0.0024261	0.00616807	0.00596772	0.00369638	0.00279498	0.00780673	0.00457042	0.00576638	0.00142311	2.54197e-05	0.00152094	0.00347284	0.0015418	0.00497277	0.00550519	0.00285211	0.00999805	0.00808218	0.00372879	0.00492437	0.00334467
ENSG00000116497	0.00984982	0.00436817	2.54197e-05	0.0110987	0.00315856	0.00586955	0.00132904	0.00248754	0.00506741	0.00276508	0.00280218	0.00902027	0.00876153	0.00193978	0.00209932	0.0066643	0.00491472	0.00492438	0.00715682	0.00378803	0.00472901	0.00688106	0.00696597	0.00327682	0.00260431	0.00427829	0.010786	0.00650826	0.0080847	0.0115223	0.00375932	0.00155959	0.00404248	0.051552	0.000823158	0.00761811	0.00372802	0.00212011	0.0101795	0.0048403	0.0037464	0.00385111	0.00397349	0.00471289	0.0030098	0.00237621	0.00211712	0.00146205	0.000609421
ENSG00000160097	0.179346	0.0193524	0.0403001	0.0091404	0.00205355	0.00445528	0.00190289	0.0475399	0.0167834	0.00663172	0.0673572	0.0609869	0.0898819	0.0423563	2.54197e-05	0.0721653	0.049266	0.0370099	0.0800042	0.00322091	0.00138902	0.00177519	0.00169862	0.0649853	0.0165188	0.0891893	0.00250484	0.00156236	0.0724448	0.0240227	0.0983508	0.105026	0.0523703	0.134263	0.00371797	0.0700638	0.00568274	0.00168306	0.00305162	0.00342992	0.00388201	0.0958168	0.054424	0.0922808	0.0223727	0.00593891	0.0128116	0.00558053	0.0387977
ENSG00000121905	0.0234079	0.0116005	0.00680117	0.0142889	0.186724	0.00633021	0.0116598	0.011584	0.0087002	0.00553543	0.0157471	0.0181776	0.00759093	0.00411401	0.00554275	0.0149002	0.00968552	0.0134704	0.0213293	0.00998477	0.0331691	0.0125406	0.00879698	0.00587649	0.0105672	0.00548226	0.0226851	0.0420808	0.0283629	0.00985214	0.00656583	0.0159582	0.0152731	0.0166839	0.00359126	0.0348612	0.0302226	0.0978996	0.0171594	0.0115695	0.00112926	0.00959686	0.0220826	0.0056308	0.0283088	0.00500326	0.0125808	0.00463803	0.00723143
ENSG00000121900	0.0206999	0.0115436	0.0072324	0.00935142	0.00749681	0.0119982	0.0154437	0.00704941	0.00663045	0.00249418	0.0186727	0.0179318	0.00501667	0.00232236	0.00309074	0.0081805	0.00646899	0.011625	0.0137905	0.00609253	0.0258001	0.012921	0.00669751	0.00279476	0.0057606	0.00347249	0.0208734	0.0281469	0.0107366	0.00824374	0.00388418	0.00830608	0.0128333	0.0305672	0.000593509	0.0271866	0.0247041	0.00111153	0.023701	0.00866843	0.00287987	0.00481533	0.0154859	0.00315928	0.0261728	0.00429707	0.0080728	0.0021044	0.00280234
ENSG00000116514	0.0114889	0.0142053	0.00823383	0.00896759	0.0034679	0.0172217	0.0096904	0.0101601	0.00831868	0.00149317	0.00399128	0.00887106	0.00526704	0.00680088	0.00195279	0.0110002	0.00716468	0.00887309	0.00593314	0.0192048	0.00564728	0.00887414	2.54197e-05	0.00526324	0.0123948	0.00229851	0.00965405	0.0131319	0.00962109	0.00629295	0.00859608	0.00448639	0.00843207	0.00740674	0.00942593	0.0208446	0.00850974	0.00404944	0.00622382	0.00491479	0.00215411	0.018651	0.0116041	0.00687095	0.0187115	0.00392957	0.0101528	0.00381001	0.00871051
ENSG00000236065	0.0374052	0.0239053	0.041601	0.0279893	0.0109243	0.0272731	0.0257375	0.0224937	0.0254924	2.54197e-05	0.0184092	0.0260086	0.0210166	0.021365	0.0207502	0.0199377	0.0104164	0.0272611	0.0204587	0.0270247	0.0224016	0.0252542	0.0256695	0.0246259	0.0268741	0.025509	0.0213884	0.0249925	0.0246636	0.0260042	0.0240041	0.0260612	0.0412423	0.0261111	0.0242825	0.0766561	0.0247375	0.00998486	0.0223318	0.0270733	0.0248842	0.0255127	0.0261418	0.0255119	0.0223559	0.0225564	0.022373	0.0265799	0.0237617
ENSG00000004455	0.00678243	0.00919355	2.54197e-05	0.0212224	2.54197e-05	0.00772055	0.0271744	0.00895911	0.00502152	0.00684864	0.00375411	0.00917489	0.00613894	0.00417053	0.00523331	0.0114905	0.00615204	0.00564027	0.00650813	0.00518011	0.00659486	2.54197e-05	0.0156967	0.00627955	0.0073398	0.00629235	0.00705154	0.00313448	0.00723057	0.0111494	0.00831621	0.00276801	0.00517486	0.0124762	0.00502191	0.00710295	0.00755283	0.00655858	0.00903908	0.0149744	0.0149601	0.00481144	0.0123695	0.00759473	0.0109098	0.00956145	0.00282927	0.00467131	0.00397963
ENSG00000142920	0.0760052	0.0344321	0.0191339	0.0159498	0.00177424	0.0259336	0.00287306	0.0248983	0.0274281	0.0176314	0.0468802	0.0491528	0.0203753	0.0361077	0.00286839	0.0200938	0.0497084	0.0346629	0.0284095	0.0153899	0.00717089	0.00296619	0.0161389	0.0181989	2.54197e-05	0.00488856	0.0335792	0.0467152	0.0324024	0.00241337	0.0350907	0.014824	0.0137146	0.0548143	0.0183489	0.0370794	0.00550411	0.00769028	0.00463623	0.0022363	0.00805491	0.0313153	0.0265189	0.0523716	0.0155754	0.010018	0.00944899	0.0331507	0.0389214
ENSG00000116525	0.00858405	0.0114914	0.00384069	0.00889195	0.00284086	0.00770052	0.000856952	0.0027904	0.00194911	0.00684682	0.00333351	0.00894568	0.00412181	0.00652915	0.00178792	0.0131861	0.00879933	0.00319464	0.00736872	0.00135298	0.00411556	0.00578774	0.0251302	0.00218485	0.00682892	0.00443442	0.00479276	0.00955213	0.00795836	0.0108336	0.00365777	0.00203668	0.00622122	0.0157634	0.000266392	0.00447679	0.00367799	0.00391198	0.00909566	0.00687979	2.54197e-05	0.018901	0.00787471	0.00431097	0.00773194	0.00676727	0.00419121	0.00599117	2.54197e-05
ENSG00000160094	0.00415424	0.00522782	2.54197e-05	2.54197e-05	0.00212735	0.00874258	0.00562675	0.00661612	0.00712363	0.00713626	0.0963089	0.00951055	0.00906884	0.000484664	0.00241599	2.54197e-05	0.01128	0.00619086	0.0107658	0.0158623	0.00172608	0.00790499	0.00719009	0.00225808	0.0038817	0.00443675	0.00781715	2.54197e-05	0.00554066	0.00377563	0.00613656	0.00384565	0.00659883	0.0263215	0.00326406	0.00671037	0.0182288	0.00201981	0.00732925	0.00195327	0.00622899	0.0103988	0.00518419	0.00700201	0.00179962	0.00588446	0.00314562	0.00927145	0.00278862
ENSG00000184389	0.331482	0.249314	0.321927	0.397537	0.2139	0.37008	0.399009	0.321396	0.326956	0.418206	1.35214	0.374626	0.235918	0.307502	0.0114123	0.3075	0.203381	0.286207	0.338576	0.366534	0.34366	0.343021	0.416387	0.329111	0.393138	0.348698	0.411233	0.358283	0.290233	0.218053	0.400692	0.167982	0.151823	0.187758	0.32229	0.31343	0.37968	0.191056	0.345718	0.362745	0.37518	0.308153	0.355978	0.273029	0.320153	0.212956	0.26167	0.251067	0.306379
ENSG00000225313	0.00177913	0.00166804	0.0018809	0.00245959	0.00296808	0.00298583	0.00284769	0.00245559	0.00253716	0.00224628	0.00625392	0.00233501	0.00132791	0.00196232	0.0011623	0.00181886	0.00230863	0.00144324	0.00167601	0.00303634	0.002852	0.00258992	0.00322901	0.00231609	0.001893	0.00108011	0.00234742	0.00264736	0.00123567	0.00139823	0.00151886	0.00232349	0.00408233	0.00291377	0.00494292	0.00174594	0.00242403	0.00232002	0.00277454	0.00206154	0.00285676	0.00222705	0.00163423	0.00163711	0.00174049	0.00188031	0.00230311	0.00171059	0.00273297
ENSG00000134686	0.00173667	0.00161648	0.00154798	0.00222778	0.00297534	0.00296291	0.00270831	0.00220345	0.00217253	0.00187083	0.007412	0.00197779	0.00138911	0.00183341	0.00125079	0.00172928	0.00229473	0.00137281	0.00165837	0.00290249	0.00300403	0.00233017	0.00315613	0.00220269	0.00160432	0.00115086	0.00216457	0.00257138	0.00117969	0.00124277	0.00152365	0.00222448	0.00399384	0.00282974	0.00557391	0.00157321	0.00242433	0.00206065	0.00281001	0.00204193	0.00245095	0.00212081	0.00166318	0.00163437	0.00151384	0.00180648	0.00263678	0.00163679	0.00264299
ENSG00000222112	0.0337321	0.0467733	0.0399368	0.0640953	0.0537874	0.053883	0.063891	0.0323448	0.031183	0.0447071	0.0817478	0.0552537	0.0436005	0.0461529	0.0532718	0.038947	0.0330654	0.0800104	0.0544	0.0565685	0.0540791	0.0589681	0.0522634	0.046842	0.0346409	0.00794338	0.0370545	0.0515749	0.0105853	0.0402073	0.0435179	0.0406284	0.0481221	0.00918571	0.0501873	0.0315439	0.0656227	0.0319883	0.0582784	0.0586614	0.0422947	0.0493279	0.0408879	0.00638435	0.0399321	0.0369862	0.0372558	0.0404509	0.036471
ENSG00000233246	0.0297199	0.00381192	0.0202059	2.54197e-05	0.00166636	0.0117334	0.0116824	0.0214925	0.0219794	0.0168521	0.0166406	0.0174398	0.074645	0.0118842	0.0156884	0.00904224	0.019597	0.0228856	0.0332086	0.00306517	0.00692301	0.0159921	0.018921	0.00891781	0.0345619	0.00664651	0.0132156	0.0515441	0.0202889	0.0170561	0.0731986	0.0100164	0.0104532	0.0229135	0.033936	0.0244223	2.54197e-05	0.00824946	0.0134972	0.00380496	0.0060681	0.0161544	0.0209768	0.0226392	0.00824613	0.00928957	0.0130716	2.54197e-05	0.0116168
ENSG00000121904	0.0497745	0.0246801	0.0455566	0.00686526	0.020075	0.00750447	0.00827134	0.044997	0.0490498	0.0716606	0.107559	0.0540474	0.0846524	0.0481887	0.00922144	0.0653448	0.0248125	0.0654898	0.0931412	0.00596533	0.00354209	0.00653736	0.00751244	0.0278731	0.0425284	0.0230579	0.101135	0.0810013	0.0397882	0.019049	0.105996	0.0470395	0.0641534	0.18629	0.0226351	0.0731076	0.00610818	0.0184502	0.0124688	0.00428532	0.0194685	0.0768897	0.0573039	0.0893196	0.0736922	0.0540884	0.066937	0.0616899	0.0524262
ENSG00000163866	0.00416615	0.0103499	0.00105224	0.0101275	0.0115966	0.00599218	0.0131317	0.00523911	0.00336251	0.00485993	0.00265351	0.0077502	0.00293725	0.00372458	0.00291174	0.00211802	0.00651024	0.00797666	0.00656132	0.0145029	0.0050949	0.00934143	0.00680169	0.00455595	0.0051532	0.00382023	0.00506018	0.0121387	0.00480053	0.00526386	0.00230279	0.00740284	0.00477838	0.014215	0.00677524	0.00757246	0.005793	0.00706759	0.00656715	0.0329533	0.00953155	0.00443731	0.0077612	0.00507001	0.00454574	0.00680079	0.00779196	0.00451433	0.00563404
ENSG00000188910	0.151857	0.0987629	0.0411048	0.0699683	0.0612999	0.101494	0.0959583	0.0821929	0.124241	0.147319	0.161905	0.103479	0.00384284	0.0426496	0.0217624	0.00163477	0.152813	0.111513	0.133416	0.0889184	0.0763875	0.105179	0.145412	0.0534068	0.124181	0.100791	0.143025	0.080869	0.082762	0.0311657	0.0033217	0.146783	0.124886	0.151224	0.0987499	0.120353	0.0712306	0.0333876	0.0745718	0.0790873	0.123259	0.00665735	0.0950949	0.143383	0.114827	0.133966	0.0201272	0.0302718	0.0994383
ENSG00000187513	0.00518685	0.0179012	0.00164762	0.0179561	0.0106659	0.0151646	0.0171779	0.00844207	0.00402281	0.00785243	0.0635227	0.0105339	0.0106893	0.00841449	0.00816981	0.00769769	0.00890927	0.0117464	0.0086859	0.0130487	0.00848518	0.0169259	0.00778239	0.00706817	0.00851655	0.0475427	0.00679729	0.0176432	0.00537196	0.00979085	0.00568495	0.0161467	0.00599518	0.0574104	0.0148609	0.0104781	0.0102159	0.00595697	0.0175423	0.00919994	0.0335503	0.00882206	0.0160494	0.00810877	0.00559873	0.00976391	0.00883834	0.00992946	0.00849856
ENSG00000230163	0.0305569	0.0279029	0.0276233	0.0410138	0.0334018	0.0417298	0.0403748	0.0277921	0.0262679	0.0357478	0.035177	0.0339536	0.0284849	0.0261765	0.0291273	0.0284555	0.0265126	0.0269181	0.0282369	0.0411499	0.0404643	0.0359367	0.0391167	0.0228859	0.0269894	0.0318863	0.038983	0.0300436	0.0245306	0.0292949	0.0277663	0.0340834	0.0268346	0.0388718	0.0195025	0.0259919	0.0406292	0.0302237	0.0375645	0.0391383	0.037063	0.0289837	0.0318812	0.0231493	0.0276301	0.0315226	0.026581	0.0294519	0.0275432
ENSG00000241014	0.0304644	0.0249725	0.0141871	0.0223834	0.0065469	0.0230589	0.0256131	0.00592698	0.00790393	0.00905582	0.0184642	0.00058201	0.0516647	0.0128935	0.0126811	0.00572084	2.54197e-05	0.0205625	0.00806609	0.0225448	0.0217539	0.0205592	0.0186063	0.031774	0.0194783	0.00735111	0.0261649	0.0253722	0.00704866	0.0061284	0.0334303	0.0122268	0.015343	0.0511866	0.00193567	0.0318347	0.0218084	0.0443627	0.0228097	0.0195691	0.0185144	0.0053169	0.0138344	0.0318169	0.029013	0.0165182	0.0270933	0.00663777	0.0190027
ENSG00000243749	0.00778501	0.0139417	0.00629714	0.00917706	0.00926507	0.00949782	0.0077166	0.00969183	0.00652072	0.00525636	0.0139648	0.00683719	0.0140974	0.00501682	0.00698109	0.00683374	0.00970833	0.00513352	0.00370814	2.54197e-05	0.0101755	0.00859175	0.00865204	0.00742917	0.0058925	0.00421453	0.0127069	0.00945349	0.00685917	0.00271817	0.0222554	0.00919292	0.008545	0.0186397	0.0132765	0.00950244	0.00906989	0.0135683	0.0087149	0.00904833	0.00684924	0.0183964	0.00409834	0.0116434	0.00736918	0.00685231	0.0199859	0.0139526	0.00762603
ENSG00000163867	0.00883777	0.0154014	0.00748438	2.54197e-05	0.00723932	0.00317836	0.0670612	2.54197e-05	0.00506911	0.0081864	0.0024688	0.00693559	0.0101627	0.00860052	0.00199397	0.00555587	0.0262718	0.00708812	0.0153176	0.00624386	0.0255575	2.54197e-05	0.0289897	0.0117496	0.00542842	0.00827243	0.0172213	0.0363312	0.0151792	0.0143513	0.0190548	0.00687471	0.0132945	0.037624	0.00800358	0.0146116	0.0327815	0.0107891	0.00171487	2.54197e-05	0.0224643	0.0141588	0.0212041	0.00900398	0.00928316	0.0222943	0.000263061	0.0111357	0.00979168
ENSG00000197056	0.0354632	0.0337212	0.0169524	0.0213863	0.0179629	0.021967	0.0219267	0.0127789	0.0106266	0.0279367	0.0223715	2.54197e-05	0.0168206	0.0169653	0.00360549	0.0103309	0.017682	0.0239813	0.0261243	0.0212299	0.0223721	0.0201563	0.025443	0.0246849	0.0133023	0.00621584	0.0400007	0.0297232	0.02517	0.0464402	0.0248152	0.0199708	0.0281916	0.0391183	0.0149019	0.0222658	0.0223388	0.0214587	0.0223037	0.0217546	0.0219413	0.0117765	0.0341115	0.012967	0.02478	0.0117453	2.54197e-05	0.0153082	0.0131216
ENSG00000116560	0.00331088	0.00371589	0.00255331	0.00125334	0.0014124	0.0058488	0.0053104	0.0030771	0.00280129	0.00255149	0.00327043	0.00480797	0.00401935	0.00243198	0.00212482	0.00385998	0.00404274	0.00121898	0.00364029	0.00325534	0.00501218	0.00188172	0.00128075	0.00194646	0.00190034	0.00352846	0.000877395	0.00365978	0.00272612	0.0021468	0.00484209	0.000628232	0.00139725	0.00417424	0.00327516	0.00274576	0.000523891	0.00183079	0.0001712	0.00232696	0.00447481	0.00380526	0.00208402	0.00327083	0.00240492	0.00360729	0.000751583	0.00167857	0.00156518
ENSG00000146463	0.0392922	0.0185876	0.0192847	0.043809	2.54197e-05	0.139154	0.00647228	0.0177931	0.0302978	0.0269973	2.54197e-05	0.0116139	0.0267959	0.0137154	0.0087553	0.0120602	0.00449219	0.00733296	0.0090691	0.0333166	0.00908077	2.54197e-05	2.54197e-05	0.0236412	0.0205921	0.00187571	2.54197e-05	0.0221408	0.0119134	0.0206762	0.0254461	0.0115732	0.0130959	0.0283843	2.54197e-05	0.0238332	0.016747	0.0210881	2.54197e-05	0.010597	2.54197e-05	0.0144315	0.00811026	0.0174554	2.54197e-05	0.0285442	0.0237303	0.0212864	0.0144974
ENSG00000142687	0.00737177	0.00457686	2.54197e-05	2.54197e-05	0.00850039	2.54197e-05	0.00588506	0.00606632	0.00628091	0.00964285	0.00829321	0.00748444	0.0053914	0.0007993	0.00212619	0.00289927	0.00353923	0.0093423	0.00787174	0.00448958	0.00329762	0.00448831	2.54197e-05	0.00275914	0.00437003	0.00043382	0.00579395	0.00213912	0.0113868	0.00595381	0.00946322	0.00605559	0.00652407	0.0141167	0.00529595	0.00431157	2.54197e-05	0.00497851	0.00270944	0.0100633	0.0172208	0.00755725	0.0120116	0.00807296	0.0104243	0.0100489	0.00590784	0.00499503	0.00443136
ENSG00000020129	0.00846431	0.00587565	0.00783012	0.0338372	0.0122786	0.049961	0.0464049	0.00438364	0.0114006	0.00413532	0.00847244	0.00972702	0.00600637	0.000511602	0.00243623	0.00326907	0.013805	0.00421914	0.0249826	0.0900653	0.00778393	0.00633507	0.0141033	0.00826728	0.00162734	0.0122577	0.0073924	0.0449244	0.0149051	0.00460779	0.0272921	0.00532553	0.0062836	0.0348369	0.00410683	0.00633576	0.052056	0.0122072	0.0633761	0.0781809	0.00725592	0.0131989	0.0579653	0.0130301	0.0124636	0.0154146	0.0196994	0.00990384	0.00417036
ENSG00000126067	0.0294045	0.058591	0.0286642	0.0720279	0.0813981	0.0366149	0.0757864	0.0218029	0.0454852	0.0285189	0.00945185	0.0240209	0.0196323	0.010996	0.0166907	0.0356423	0.0247403	0.0394247	0.0153669	0.0520647	0.0755008	0.0490079	0.0394089	0.0134431	0.0461834	0.0164662	0.0115513	0.0767448	0.0402224	0.0269548	0.0281896	0.0275581	0.0286076	0.0563811	0.0212946	0.0405894	0.0707958	0.0458809	0.0547034	0.0642186	0.0600397	0.0149871	0.0882404	0.0241303	0.0371926	0.0322778	0.0199036	0.0161429	0.0329015
ENSG00000142686	0.0195849	0.00897916	0.00340379	0.00251306	9.72823e-05	0.0069395	2.54197e-05	0.0028906	0.000856277	0.00619204	0.0260289	0.0235093	0.0234951	0.0183701	0.00372775	0.00212956	0.0160721	0.00837982	0.00732121	0.00248933	0.00314545	0.00529739	0.0185499	0.00659731	0.000895449	0.00731314	0.00253134	0.0269794	0.00379981	0.0168724	0.00988613	0.0122692	0.01367	0.0210319	0.00398745	0.0088986	0.00468263	2.54197e-05	0.00207519	0.005644	2.54197e-05	0.0132403	0.0268837	0.0410149	0.0186778	0.030524	0.00190673	0.00802262	0.0110558
ENSG00000134698	0.00660338	0.00335891	0.00458946	0.011966	0.00715418	0.0359944	0.0280621	0.0027676	0.00404167	0.00571068	0.0177009	0.00231486	0.00574591	0.0094976	2.54197e-05	0.00726555	0.00673152	0.0091025	0.00974403	0.0145348	0.0113361	0.0189676	0.0293078	0.00235363	0.00422392	0.0043966	0.00938101	0.00628819	0.0117901	0.0135353	0.00534471	0.00177261	0.00503966	0.00423204	0.007412	0.01377	0.0007959	0.00987297	0.00764319	0.0184447	0.0274445	0.00475845	0.016453	0.00470621	0.0101386	0.00543387	0.00191562	0.0053582	2.54197e-05
ENSG00000092847	0.0105176	0.0157599	0.00705351	2.54197e-05	0.00430396	0.0216784	0.00714078	0.00893405	0.00335418	0.0101886	2.54197e-05	0.0133035	0.0138878	2.54197e-05	0.00464808	0.00309085	0.013463	0.00420131	0.0188968	2.54197e-05	0.00812962	0.00419992	0.0187724	0.00329262	0.00418356	0.00555729	0.0100822	0.0175083	0.00640517	0.00201333	0.0163262	0.00482185	0.0176319	0.0272665	0.00519161	0.00914106	0.00525837	0.00963376	0.00132837	0.0118022	0.0164339	0.00476814	0.0105694	0.00699977	0.00701854	0.00717708	0.0074565	0.00592258	0.0114155
ENSG00000126070	0.0144352	0.00477761	0.000591688	0.0171312	0.00127391	0.00260159	0.0173735	0.00662205	0.00391421	0.0123621	0.0497796	0.0139737	0.0155244	0.0190152	0.00488542	0.0100925	0.0112295	0.000653027	0.0135221	0.0173077	0.0118154	0.00819589	0.0216384	0.00279605	0.00814296	0.00175253	0.00656512	0.00844249	0.00701646	0.0210016	0.0151085	0.0126157	0.00769784	0.0427396	0.00962729	0.0144172	0.0153817	0.00200501	0.00342268	0.00649213	2.54197e-05	0.00934406	0.0308397	0.015622	0.00151534	0.00690776	2.54197e-05	0.0065987	0.0114671
ENSG00000116863	0.0140835	0.0168183	0.00521267	2.54197e-05	2.54197e-05	2.54197e-05	0.0110806	0.0154313	0.00802057	2.54197e-05	0.0011904	0.00730789	0.00279539	0.012611	0.00753587	2.54197e-05	0.00913498	2.54197e-05	0.00197533	0.0120956	0.0113491	0.0519619	0.0146382	0.0019557	0.00187151	0.00121725	0.00981739	0.00283272	0.00497604	0.0119225	0.00677563	2.54197e-05	0.0125696	0.00591156	0.00509007	0.00668909	0.0183252	0.0120842	0.0130421	0.0154718	2.54197e-05	0.00102246	0.00867255	0.00460727	0.0147171	2.54197e-05	0.0159068	0.00170581	2.54197e-05
ENSG00000171812	0.0107708	0.0117808	0.0121257	0.0302696	0.00856572	0.026334	0.0294895	0.0188273	0.0100423	0.00920063	0.0854939	0.0403831	0.019046	0.0152972	0.0271869	0.0110266	0.0133108	0.0119693	0.0110765	0.0292391	0.0376361	0.0249915	0.023782	0.0222431	0.00662252	0.0197129	0.0030368	0.0384689	0.00533161	0.0198814	0.0148437	0.00329639	0.038518	0.116181	0.0269092	0.0102539	0.0305669	0.0118499	0.0326066	0.0303806	0.0581342	0.0185254	0.0394174	0.0261594	0.000541693	0.00704763	0.0152623	0.00318295	0.0191578
ENSG00000054116	0.00834747	0.00587035	0.0409832	0.0143302	0.00481813	0.00880494	0.0148428	0.0021952	0.0067375	0.0157709	0.00157022	0.00666549	0.0049835	0.00570366	0.00719198	0.010023	0.0106618	0.0101538	0.00505683	0.0112762	0.00746244	0.00830284	0.0064675	0.00762236	0.0075096	0.0108254	0.00811309	0.0100537	0.00587775	0.00872874	0.00681016	0.00200221	0.01178	0.0115972	0.00566662	0.0129767	0.00222804	0.00741452	0.00479763	0.00782443	0.0150995	0.00689258	0.0100805	0.0086825	0.00106024	0.00428082	0.00962039	0.00596417	0.0112005
ENSG00000116871	0.00377747	0.00308732	0.00621467	0.00259383	0.00400755	0.00123532	0.00219258	0.00181641	0.00271804	0.00334168	0.00542024	0.00591115	0.00455717	0.00366289	0.0049299	0.00602715	0.00270239	0.00311417	0.00192598	0.00356387	0.00341184	0.00211572	0.00233598	0.00317444	0.00278314	0.00180753	0.00429491	0.00527857	0.00191396	0.00189833	0.00373671	0.00439802	0.00447235	0.0180181	0.00215074	0.00275894	0.00350597	0.00299483	0.00150293	0.000816898	0.000924299	0.00722993	0.00369117	0.00332364	0.00160058	0.00289633	0.00360149	0.00326544	0.00245525
ENSG00000054118	0.00244072	0.00322166	0.00364822	0.00411334	0.00571271	0.00190759	0.00982206	0.00312233	0.00191006	0.0021545	0.0011129	0.00274091	0.00419157	0.00374895	0.0030456	0.00693149	0.00357508	0.0033465	0.00346121	0.0061687	0.00364952	0.00351773	0.0175995	0.00507082	0.00286232	0.00128781	0.00404562	0.00214183	0.00525334	0.00482599	0.00343194	0.00365154	0.00328378	0.00732006	0.00113205	0.00320232	0.00321932	0.00369976	0.00494275	0.00718192	0.00626183	0.0024281	0.00628154	0.00388084	0.00122173	0.00675198	0.00131401	0.00315682	0.00311075
ENSG00000214193	0.00707342	0.00683021	0.00503609	0.0268929	2.54197e-05	0.0153727	0.0197248	0.01407	0.0131701	0.018544	0.00798695	0.00851386	0.00483575	0.0199021	0.00619451	0.00662582	0.00835704	0.00655436	0.0046753	0.0112786	0.0236896	0.0144804	0.0132412	0.0272129	0.00727298	0.00158168	0.00480759	0.0126316	0.00884667	0.0143069	0.00392525	0.00641361	0.0129284	0.0171943	0.00886236	0.00868698	0.0150381	0.00498251	0.012561	0.0242287	0.0240842	0.00733387	0.0146251	0.00894166	0.00659094	0.00371546	0.00789719	0.00785122	0.00696185
ENSG00000142694	0.00859384	0.00722774	0.0111785	0.019991	0.0156237	0.00463196	0.00523547	0.0153071	0.0126455	0.0139554	0.0276647	0.00730457	0.0183386	0.0270584	0.014308	0.0123809	0.00918033	0.00684727	0.00802998	0.0229564	0.0355026	0.00704447	0.01783	0.0165139	0.00703194	0.00184726	0.00629095	0.00822282	0.00917259	0.0168169	0.0187547	0.00645477	0.0274528	0.0210021	0.0101924	0.0100858	0.0245011	0.0187382	0.0291749	0.029237	0.0419848	0.0159867	0.0138064	0.00922304	0.00849883	0.0017149	0.0175769	0.00833133	0.00659769
ENSG00000116883	0.0360541	0.0181352	0.0350047	0.00864312	0.0187007	0.0338418	0.0175052	0.0374717	0.0309173	0.0372633	0.152299	0.101545	0.0336316	0.0562812	0.00957852	0.0239508	0.0308647	0.0237883	0.0343764	0.0287117	0.01327	0.0182711	0.0142036	0.0618748	0.0300859	0.0248437	0.0357516	0.0722426	0.0255433	0.0242287	0.028427	0.0235196	0.0625586	0.0605868	0.0230838	0.0306987	0.01234	0.0159704	0.0121138	0.0161823	0.0365469	0.0636429	0.0357301	0.0363273	0.0165772	0.028895	0.0416516	0.0562538	0.0250462
ENSG00000196182	0.00416804	0.0024018	2.54197e-05	0.00911964	0.00821824	2.54197e-05	0.00337448	0.0019452	0.00260715	0.00154818	0.00518243	0.00264989	0.00337363	0.00260363	0.00117268	0.00372729	0.00268885	0.00511018	0.00396172	0.00392539	0.00468377	0.000677553	2.54197e-05	0.00299062	0.00249867	0.00416106	0.00330149	0.00286376	0.00644554	0.00618383	0.00433392	0.00262849	0.00471483	0.00194464	0.0112035	0.00530459	0.00340394	0.00502281	0.00236806	0.00403283	0.00543615	0.00330742	0.00162835	0.00412023	0.00156774	0.00490369	0.00267771	0.00314737	0.00332267
ENSG00000181817	0.00409062	0.00392696	0.000182868	0.00508917	0.00583572	0.00547706	0.00457065	0.00135803	0.00398345	0.00340105	2.54197e-05	0.00501517	0.00489732	0.00286428	0.00075055	2.54197e-05	0.00467476	0.00302906	0.00370396	0.00410244	0.00542994	0.00393311	0.00489894	0.00488305	0.00259846	0.00165586	0.00154042	0.00588133	0.00519433	0.00431709	0.00496222	0.00238414	0.00492146	0.00591404	0.00853044	0.00680553	0.00413907	0.00693171	0.00903577	0.00509845	2.54197e-05	0.00346552	0.00363286	0.00352001	0.00620787	0.00371422	0.00529805	0.00259802	0.00155025
ENSG00000116885	0.0107786	0.0131585	0.0102739	0.016757	0.006007	0.0101872	0.00482419	0.0063102	0.00569035	0.020083	0.14451	0.00709773	0.0075108	0.0153969	0.0242757	0.00516141	0.0076562	0.00812451	0.00684817	0.00648272	0.00243323	0.0111169	0.00333897	0.00341778	0.00830815	0.000402817	0.0114892	0.012521	0.012602	0.00766937	0.0149177	0.00876468	0.00798486	0.0176663	0.00295784	0.00879643	0.00528381	0.0143111	0.00669814	0.00855341	0.00972223	0.0143675	0.0155465	0.00494404	0.0118201	0.00826442	0.00443258	0.00686094	0.018911
ENSG00000116898	0.00542289	0.00401476	2.54197e-05	0.00196234	0.00203358	0.00430263	0.00312287	0.00428222	0.00386622	0.00215751	0.000721214	0.00480881	0.0034211	0.00193668	0.00440764	0.00411809	0.00355977	0.00587931	0.00508558	0.00648721	0.00709416	0.00356203	0.0151477	0.00165899	0.00220838	0.00192202	0.00147089	2.54197e-05	0.00562732	0.00644088	0.00704349	0.00397817	0.00273606	0.00665499	0.000300456	0.00534258	0.00382182	0.00318852	0.00175436	0.000762083	0.013308	0.00267428	0.0045542	0.00540515	0.00814521	0.00468129	0.00253723	0.00341001	0.00272205
ENSG00000119535	0.0227163	0.0229175	0.0256139	0.0370082	0.055886	0.0331871	0.0190037	0.0228086	0.021638	0.0249168	0.0837	0.0655087	0.053916	0.0136681	0.0284762	0.0161777	0.0130396	0.0224196	0.0229888	0.0123289	0.0198284	0.0127236	0.0194401	0.0369403	0.0246715	0.0573833	0.0370197	0.0222471	0.0256545	0.0179725	0.081811	0.0126748	0.0156239	0.0136574	0.0206833	0.0384086	0.037811	0.0933234	0.0201284	0.0451415	0.0198456	0.0252664	0.024428	0.0146379	0.0876785	0.012862	0.0329979	0.0198631	0.0317306
ENSG00000233621	0.0710935	0.0476795	0.048573	0.0792534	0.0654502	0.0765597	0.0854336	0.0464783	0.0673706	0.0732942	0.0513079	0.0205538	0.0368697	0.0109068	0.0183963	0.0594478	0.0757137	0.0529989	0.0450267	0.0896546	0.0910411	0.0806044	0.088214	0.0293071	0.0810374	0.0421505	0.113965	0.0215174	0.0466409	0.0138737	0.0323416	0.0264424	0.0343915	0.026216	0.0389446	0.0575041	0.0773432	0.0596134	0.0831434	0.0972726	0.124752	0.0265448	0.0176242	0.0177262	0.0459825	0.0259282	0.00499817	0.0242397	0.124288
ENSG00000163874	0.0171854	0.0102234	0.0211561	0.018893	0.0109659	0.0196269	0.0189227	0.00457248	0.00354143	0.00400131	0.00333337	0.00884678	0.00442971	0.00660273	0.0166905	0.00485667	0.005142	0.00413084	0.00688193	0.0190311	0.0207904	0.0164766	0.0187276	0.00329245	0.00908609	2.54197e-05	0.00596218	0.00808886	0.0312912	0.0195192	0.00732381	2.54197e-05	0.0124958	0.00662423	0.0148156	0.0127473	0.0193207	0.0166369	0.0201254	0.0212358	0.017668	0.00510533	0.0112755	0.00563607	0.0213597	0.00859667	0.00656394	0.00247335	0.0162428
ENSG00000163875	0.00476689	0.0043628	0.00937141	0.0021521	0.00494156	0.00658025	0.00332288	0.00383077	0.00437979	0.00560625	0.00432461	0.00378698	0.00352882	0.00305056	0.0084761	0.00417779	0.00570559	0.00612231	0.00458588	0.00262572	0.00427811	0.00445799	0.00542374	0.00491516	0.00549525	0.00537645	0.00731281	0.00971407	0.0055471	0.00916378	0.00430758	0.00805107	0.00493176	0.0108883	0.00520079	0.00573108	0.00392494	0.00496823	0.00383113	0.00312935	0.00540612	0.00367719	0.00343717	0.00388125	0.00413658	0.00355076	0.00138366	0.00391638	0.00387071
ENSG00000163877	0.0256915	0.0278966	0.0165072	0.0278317	0.0131296	0.0383246	0.0516541	0.017785	0.0130972	0.0260942	0.0110801	0.0297892	0.0159674	0.00887164	0.00998464	0.0169616	0.0327244	2.54197e-05	0.0214436	0.0280864	0.0342796	2.54197e-05	0.0105952	0.0149634	0.0133607	0.00769091	0.0175986	0.020746	0.0260898	0.0689192	0.0186881	0.0192091	0.0277045	0.0352114	0.00611288	0.0496807	0.0545258	0.00889456	0.00216267	0.0240261	0.000109133	0.0153024	0.0440783	0.0226572	0.0196411	0.00650072	0.0016367	0.0126199	0.0119093
ENSG00000163879	0.0308073	0.0326671	0.0162279	0.0179193	0.0391802	0.0198991	0.0302868	0.0311334	0.0186733	0.022681	0.130406	0.0101225	0.0510428	0.0215296	0.00207169	0.0238169	0.0237088	0.0239548	0.0157423	0.0238687	0.0195863	0.0189574	0.0257273	0.0265005	0.019161	0.0340414	0.080936	0.0281692	0.0145958	0.0145941	0.0551108	0.0197263	0.0136747	0.0696833	0.0310469	0.033518	0.019497	0.0235869	0.0236543	0.0335639	0.0221462	0.0378747	0.00738044	0.0130217	0.00956367	0.0134092	0.0228904	0.017012	0.0141004
ENSG00000134697	0.0390497	0.0520921	0.0618096	0.0712519	0.088815	0.0719232	0.071527	0.0688019	0.0430759	0.0466523	0.0137543	0.101446	0.0302571	0.0447501	0.0264188	0.0425423	0.0268592	0.0375063	0.0467787	0.0957619	0.102474	0.0290431	0.0631772	0.0825207	0.057901	0.043196	0.044351	0.0666649	0.0416492	0.0394543	0.0420066	0.0264084	0.0514429	0.0760788	0.0324757	0.0430385	0.0716372	0.0885518	0.0299355	0.0764833	0.0606675	0.0676893	0.0509946	0.0375278	0.0259199	0.0349701	0.0351189	0.08762	0.0274935
ENSG00000169218	0.126924	0.099566	0.0424324	0.18109	0.0939419	0.220948	0.182972	0.0837961	0.0959944	0.125502	0.359506	0.0445754	0.0103553	0.0230934	0.0554377	0.0153068	0.00700317	0.100838	0.0252883	0.134126	0.162518	0.15269	0.235727	0.0573168	0.0361703	0.106788	0.230397	0.0699523	0.161596	0.0336405	0.0110054	0.0527552	0.121201	0.232451	0.0582398	0.12945	0.171705	0.0757933	0.142601	0.232686	0.192439	0.00661826	0.0514231	0.0121704	0.067707	0.076357	0.0273824	0.0309199	0.00738504
ENSG00000116922	0.00645895	0.00719374	0.000771409	0.00271592	0.00524559	0.0137741	0.0201065	0.00668355	0.00774561	0.00751878	0.00152597	0.00923049	0.00719616	0.0110379	0.00436739	0.000395077	0.00482694	0.00886775	0.00618513	0.0129159	0.0043761	0.00491903	0.00929394	0.00636808	0.00427989	0.00304732	0.00486209	0.00404645	0.00664562	0.0087779	0.00794347	0.0102332	0.00742418	0.0364715	0.00572114	0.0074811	0.00797439	0.0058942	0.00311978	0.00331773	0.000802252	0.00434652	0.00850961	0.00981238	0.00670002	0.00762301	0.00517239	0.00376244	0.00646424
ENSG00000134690	0.0267724	0.0272122	0.0121567	0.0410401	0.0313677	0.036419	0.0379585	2.54197e-05	0.0281452	0.0491408	0.00392833	0.0285012	0.00963082	0.0117643	0.00255921	0.00552818	0.0470945	0.028153	0.0464604	0.048094	0.0385412	0.0360246	0.0326067	0.00518802	0.0295293	0.002755	0.0459393	0.0402122	0.0383132	0.0395728	0.013186	0.00696945	0.0520476	0.0234198	2.54197e-05	0.0333978	0.0335954	0.0311689	0.0294422	0.042939	0.0296738	0.00204009	0.0408769	0.0177379	0.034936	0.0325039	0.0149592	0.00657251	0.0314946
ENSG00000196449	0.00754464	0.0129687	0.0131905	0.00281444	0.00585748	0.00705529	0.0140019	0.00677121	0.00427754	0.0136306	0.00411692	0.00774414	0.00132148	0.00331256	0.0010909	0.00973945	0.00692887	0.00774472	0.00395807	0.00466571	0.00753738	0.00830467	0.00810419	0.00441601	0.00497422	0.00561823	0.00835857	0.00829958	0.00934846	0.0059249	0.00671065	0.0015802	0.0109471	0.0168981	0.00513428	0.00831531	0.00234653	0.00306922	0.0073771	0.00411191	0.0143842	0.00422217	0.00635475	0.00504439	0.0115679	0.00591727	0.00439091	0.00315604	0.022248
ENSG00000197982	0.00134897	0.00548647	0.0027464	0.00534288	0.0052663	0.00503603	0.00526827	0.000302411	0.00132988	0.00702179	0.00429457	0.00949759	0.000500138	0.00667574	0.0107273	0.00372659	0.00320287	2.54197e-05	0.00632988	0.00567473	0.00535971	0.00534202	0.00261807	2.54197e-05	0.00534602	0.00342731	2.54197e-05	0.0305292	0.00501548	2.54197e-05	0.0186157	0.00522071	0.00226483	2.54197e-05	0.00560321	2.54197e-05	0.00535593	0.00570973	0.00534224	0.00549374	0.00194341	0.00259739	0.00298831	0.00333643	0.00434488	0.0123035	0.00139726	0.00946447	0.00315866
ENSG00000188786	0.0114057	0.0134465	0.0209513	0.00862523	0.00505168	0.0106416	0.0077915	0.00356199	0.0011392	0.0103245	2.54197e-05	0.0140139	0.00484258	0.00280527	0.00335003	0.0131666	0.00415217	0.0140546	0.00677341	0.00899252	0.00750599	0.0176261	0.0117629	0.00911689	0.00214581	0.00086632	0.000965675	0.0147162	0.0109104	0.0217052	0.00844954	0.00222244	0.0193238	0.00697998	0.00706937	0.00814523	0.00764356	0.00593217	0.0111314	0.0113277	0.00523707	0.00537465	0.00729709	0.00634757	2.54197e-05	0.0192523	0.00741396	4.81466e-05	0.00833939
ENSG00000204084	0.0194953	0.025531	0.0247072	0.0199986	0.0217682	0.0197187	0.0178036	0.0262391	0.0332067	0.0139719	0.014159	0.0241037	0.0114367	0.0224327	0.00841776	0.018087	0.0235418	0.0262176	0.0179231	0.0215873	0.0160534	0.0145644	0.0078802	0.022977	0.0357995	0.0048544	0.014223	0.0142482	0.0168263	0.0159758	0.0145994	0.0313594	0.0131141	0.0458939	0.0181584	0.0306452	0.0132357	0.0269999	0.0146525	0.0153457	0.0134271	0.0184549	0.0109625	0.0229067	0.016267	0.0224561	0.0139159	0.0235975	0.0163499
ENSG00000183431	0.00595103	0.00565162	0.00626091	0.00755792	0.00592444	0.0164722	0.00889838	0.00446399	0.00400204	0.00500386	0.00148444	0.00475187	0.00463609	0.00189876	0.00189131	0.00115333	0.00593716	0.00910217	0.00512141	0.00501459	0.00570429	0.00459132	0.00617712	0.00343	0.00448896	0.00157049	0.00578745	0.00462601	0.009994	0.00600279	0.00733269	0.00814448	0.00368162	0.0295823	0.00448477	0.00579331	0.00436004	0.00375404	0.00571248	0.00506852	0.00922953	0.0038888	0.00276494	0.0173994	0.00743241	0.00312818	0.00650444	0.00403739	0.00300964
ENSG00000183386	0.012417	0.0152916	0.00882265	0.0145317	0.015608	0.0423902	0.00486332	0.00574111	0.00494351	0.0133678	0.0721044	0.0259941	0.0101856	0.0106253	0.00406021	0.00926022	0.00756758	0.0106388	0.0127691	0.0241063	0.00723477	0.00728049	0.00343555	0.0036063	0.00528047	0.00365331	0.00557748	0.0149534	0.00842153	0.00763653	0.00960184	0.0286366	0.013427	0.0766175	0.0304388	0.011582	0.0386547	0.0156083	0.00941247	0.0068839	0.00383227	0.00929935	0.00778805	0.0145353	0.00641279	0.0121782	0.00757132	0.0109622	0.00317692
ENSG00000183520	0.0434429	0.0302304	0.028283	0.0710046	0.029957	0.0826803	0.0698909	0.02843	0.0296451	0.0190147	0.0055811	0.00550657	0.0137446	0.024909	0.0146756	0.0486834	0.031952	0.0230162	0.0284663	0.0138596	0.0676646	0.136566	0.0668848	0.0177797	0.0390703	0.0219798	0.021319	0.0171939	0.0340487	0.0382832	0.0455851	0.0283151	0.0264413	0.0973196	0.0225517	0.0325516	0.0725534	0.066834	0.0690712	0.0721373	0.0617829	0.0145282	0.0394422	0.037496	0.0255462	0.0146133	0.013256	0.0150262	0.0694892
ENSG00000116954	0.00318854	0.00610472	0.00394011	0.0194144	0.000228538	0.00913934	2.54197e-05	0.000906492	0.0043323	0.00392809	2.54197e-05	2.54197e-05	0.00138313	0.00149206	0.00326984	0.00353628	0.00372676	0.0088873	0.00563978	0.00282701	0.000709529	0.00798083	0.0308406	0.00107312	0.00805585	0.00101599	0.0022837	0.0267533	0.0055511	0.0163322	0.00542786	0.000219731	0.00640142	0.0145253	0.00136605	0.00328248	0.00890312	0.00216709	0.00576722	0.00154485	0.00576697	0.00222376	2.54197e-05	0.00737564	2.54197e-05	0.0128556	0.00188896	0.000988103	2.54197e-05
ENSG00000228436	0.0138867	0.012215	0.00581093	0.00552433	0.00420938	0.00995964	0.00844538	0.0044311	0.00522282	0.011352	0.00424764	0.00674649	0.00565052	0.0113649	0.00489618	0.00167477	0.0108078	0.0106861	0.0114846	0.00255846	0.00232327	0.00200946	0.0076036	0.00378435	0.00993727	0.00402294	0.0117252	0.00969761	0.0101285	0.0146565	0.00509132	0.0137379	0.00520471	0.0152586	0.0016872	0.0165551	0.016463	0.00228619	0.0142368	0.0125404	0.00524657	0.00359923	0.00930453	0.00488231	0.0108068	0.00301843	0.00500373	0.00247069	0.012362
ENSG00000214114	0.0417006	0.0505639	0.0319859	0.0472197	0.0405015	0.0497717	0.0509277	0.0193719	0.0366971	0.0451219	0.00662422	0.0130621	0.0124969	0.0102282	0.00762216	0.041395	0.0607658	0.0569739	0.0831854	0.0498971	0.0537557	0.0453239	0.0563289	2.54197e-05	0.0205092	0.00371759	0.0163043	0.0627054	0.0533311	0.0465409	0.141442	0.011107	0.0311475	0.0596441	0.0131222	0.026138	0.04921	0.0499063	0.0496812	0.0500902	0.0421321	0.00334123	0.0563004	0.0431337	0.0487696	0.0371104	0.00945866	0.0327363	0.0365694
ENSG00000158315	0.0249758	0.0418647	0.0116202	0.0130331	0.00794764	0.0112328	0.0105827	0.018809	0.019115	0.021291	0.0458889	0.0275631	0.00740059	0.0546007	0.00619288	0.00125335	0.033306	0.064485	0.0375344	0.00588136	0.00273064	0.00571711	0.0124057	0.00708129	0.0171309	0.0157931	0.0334345	0.0379708	0.0353586	0.0165545	0.00791083	0.0353853	0.0359279	0.0667074	0.0178926	0.0795387	0.0193025	0.00843871	0.0104349	0.0101648	0.00612111	0.00649759	0.030375	0.0168736	0.0246045	0.011282	0.0124013	0.00446938	0.0263135
ENSG00000174574	0.00621546	0.00398899	2.54197e-05	0.00393057	0.00304659	0.0133495	0.00200754	0.00233932	0.0028799	0.00406628	0.0049131	0.00362611	0.00468782	0.0027092	0.00135393	0.00102909	0.00258506	0.00207826	0.00399769	0.00271959	0.00482697	0.00556991	0.0152956	0.00297599	0.00201246	0.00299673	0.00366101	0.00886331	0.00471923	0.00454844	0.00541059	0.0024436	0.00406858	0.00648264	0.00123679	0.00287637	0.00351229	0.00343555	0.00196217	0.00339843	0.0228298	0.00436602	0.00159079	0.00309765	0.00169174	0.00257865	0.00345274	0.00178624	0.00437719
ENSG00000168653	0.00566084	0.00679655	0.0147402	0.000483377	0.00567219	0.00634204	0.000111827	0.0109562	0.0180328	0.00541635	0.0135753	0.00896827	0.0212636	0.01494	0.0537896	0.00416699	0.00656928	0.00565309	0.0164031	0.00248292	0.00449238	0.00553638	0.00643811	0.0105684	0.0124026	0.0127523	0.00940696	0.0127931	0.00869817	0.0158204	0.012664	0.006818	0.0215016	0.0189369	0.00797476	0.0108458	0.00199817	0.00341773	0.00180248	0.00280659	0.00619645	0.00879134	0.0171205	0.0280734	0.0506057	0.00423018	0.0184208	0.0081838	0.0327096
ENSG00000127603	0.00163112	0.00156224	2.54197e-05	0.0015108	0.00134811	0.00159594	0.00103713	0.000916585	0.000959389	0.000429267	0.00356065	0.00240669	0.0029625	0.00335637	0.000928318	0.00165607	0.00322043	0.00144408	0.00202037	0.00171193	0.00199634	0.00162955	0.00169348	0.00202005	0.000930467	0.00176961	0.00254867	0.00407619	0.00255275	0.00227093	0.00409811	0.00230897	0.002967	0.00591127	0.00198517	0.00108111	0.00287999	0.00103767	0.0013808	0.00693252	0.000994385	0.00177095	0.00297701	0.000710714	0.0024707	0.00216509	0.00248171	0.00102366	0.000901974
ENSG00000183682	0.592643	0.782167	0.765365	0.766877	0.893867	0.893867	0.893867	0.817767	0.741068	0.245446	0.893867	0.117606	0.893867	0.788659	0.0570931	0.653544	0.528729	0.625781	0.893867	0.781282	0.512519	0.860956	0.824362	0.62706	0.893867	0.666362	0.28708	0.408572	0.432682	0.870667	0.893867	0.893867	0.275076	0.893867	0.893867	0.52858	0.544778	0.891936	0.560892	0.531175	0.559721	0.893867	0.893867	0.743134	0.336741	0.893867	0.893867	0.556291	0.355514
ENSG00000182109	0.553556	0.893867	0.685651	0.411693	0.893867	0.412547	0.489403	0.768523	0.651996	0.189372	0.893867	0.102272	0.893867	0.679725	0.0378813	0.545048	0.461857	0.641869	0.893867	0.392252	0.287243	0.61934	0.357729	0.49494	0.827336	0.855681	0.20734	0.459983	0.297955	0.660386	0.893867	0.893867	0.0750946	0.893867	0.893867	0.623947	0.266195	0.893867	0.269684	0.256722	0.179373	0.893867	0.893867	0.71661	0.227188	0.893867	0.893867	0.501417	0.290722
ENSG00000243970	0.893867	0.893867	0.893867	0.893867	0.893867	0.893867	0.893867	0.893867	0.893867	0.79801	0.893867	0.249756	0.893867	0.893867	0.29626	0.893867	0.893867	0.893867	0.893867	0.893867	0.893867	0.893867	0.893867	0.893867	0.893867	0.893867	0.893867	0.749261	0.893867	0.893867	0.893867	0.893867	0.870586	0.893867	0.893867	0.893867	0.893867	0.893867	0.893867	0.893867	0.893867	0.893867	0.893867	0.893867	0.893867	0.893867	0.893867	0.893867	0.893867
ENSG00000090621	0.0162202	0.0100545	0.0214223	0.0168742	0.0266948	0.0209967	0.0129311	0.0184211	0.00983694	0.00517496	0.018156	0.00654547	0.0108889	0.0101932	0.00643401	0.00835203	0.0120499	0.00722338	0.0114863	0.0190725	0.00978461	0.00691889	0.00823607	0.00829125	0.0125273	0.0162467	0.00542473	0.0188716	0.0111881	0.0182212	0.0118331	0.00878395	0.0087726	0.0108179	0.0104005	0.012079	0.00639713	0.0266369	0.0184172	0.0122744	0.0223282	0.0202674	0.0237553	0.0113932	0.00362357	0.0135201	0.0168302	0.0112061	0.00574776
ENSG00000228060	0.0171889	0.0124271	0.00881047	0.0240298	0.0168612	0.0272652	0.0220325	0.0132412	0.00676102	0.00606257	0.00369913	0.00844748	0.00783474	0.00697237	0.00408057	0.00637311	0.0115009	0.0143719	0.00975299	2.54197e-05	0.0198084	0.0321743	0.0359653	0.00827849	0.00828763	0.00825292	0.00201774	0.00199394	0.0147501	0.00482917	0.0177944	0.0180578	0.00414567	0.0193145	0.00306841	0.0122182	0.0243047	0.00405895	0.034814	0.0321633	0.0100209	0.00874566	0.0198505	0.00845193	0.00475747	0.0130961	0.0107667	0.00342868	0.00547955
ENSG00000163909	0.0108813	0.00688496	0.0235241	0.00348822	0.00715508	0.0397922	0.0156833	0.00835077	0.00486879	0.00319897	0.0208232	0.00182423	0.0147501	2.54197e-05	0.00241102	0.00372247	0.00581919	0.00432584	0.0102062	0.0153995	0.0131901	0.00607708	0.00850079	0.00659865	0.00622091	0.0164122	0.00297413	0.0283104	0.0109696	0.00455081	0.0262751	0.00476738	0.00387863	0.0309464	0.00438688	0.00472983	0.040349	0.013741	0.026375	0.0101475	0.0138015	0.00111244	0.00391876	0.00465434	0.00539302	0.00659361	0.0144508	2.54197e-05	0.00333686
ENSG00000084072	0.0879339	0.0483692	0.0595492	0.0309392	0.0218505	0.0424321	0.030841	0.0281224	0.0148785	0.0340556	0.080182	0.0803545	0.13568	0.105008	0.028292	0.069343	0.0656994	0.0531619	0.0930558	0.0268454	0.0311039	0.019833	0.0525728	0.0664583	0.0214995	0.0111377	0.0179459	0.0476467	0.0282248	0.058717	0.122945	0.106807	0.0710724	0.168736	0.0320483	0.0500889	0.0198446	0.0144874	0.0211863	0.0157284	0.0973481	0.051661	0.0609685	0.10176	0.055735	0.0346944	0.104445	0.0661225	0.0385591
ENSG00000116985	0.0515519	0.0623343	0.0789386	0.0182503	0.0705517	0.0388513	0.0514237	0.0306855	0.0302483	0.142345	0.5857	0.013962	0.0311685	0.060353	0.0117017	0.0214484	0.045464	0.0225308	0.0595537	0.0416788	0.0608071	0.0511909	0.0377609	0.0305341	0.0251058	0.0866834	0.102959	0.080268	0.00609366	0.068972	0.0398464	0.0532004	0.0852936	0.0601991	0.0772156	0.0914819	0.0616435	0.0332453	0.0521783	0.0293495	0.0895575	0.0427444	0.0924338	0.0296492	0.149069	0.0387663	0.0221736	0.0266561	0.0501964
ENSG00000043514	0.0110041	0.0155292	0.0105828	0.0119466	0.00359665	0.00357775	0.00945918	0.00653356	0.0140324	0.0112272	0.0109039	0.0132575	0.0066465	0.00819516	0.00928922	0.00379839	0.00959567	0.0112485	0.0065695	0.00974185	0.00343789	0.00555777	0.00317012	0.00917458	0.00982259	0.00899258	0.0152071	0.0110478	0.00792817	0.0080597	0.00711513	0.00654044	0.00721746	0.028567	0.0084594	0.00697076	0.0102885	0.00454425	0.00466283	0.00792758	0.00880318	0.00906719	0.0309195	0.0105313	0.00502495	0.00422296	0.00407576	0.00778499	0.011601
ENSG00000131236	0.0056231	0.00377523	0.000899372	0.00767135	0.00316802	0.00192182	0.00832572	0.00562709	0.00306075	0.00277308	0.00795498	0.0048604	0.00334551	0.0126263	0.0110393	0.00619327	0.00537937	0.00354917	0.00384124	0.00726078	0.00437907	0.00222627	0.00295774	0.00421234	0.0029358	0.00754974	0.00527605	0.00298585	0.00518109	0.00272608	0.00616604	0.00488036	0.00439298	0.00628202	0.00103648	0.00575288	0.00561482	0.00230605	0.00191911	0.00599128	0.0052802	0.00554005	0.0091222	0.00460992	0.00330704	0.00116739	0.00706425	0.00528238	0.00437968
ENSG00000131238	0.0281992	0.0323823	0.0276715	0.0323367	0.0251817	0.029358	0.0300922	0.0392782	0.0391973	0.0332729	0.0550036	0.0302935	0.0470484	0.0332397	0.0401021	0.0331028	0.03668	0.0280272	0.0308026	0.0268058	0.0221412	0.0274791	0.0456052	0.0376439	0.0366813	0.0566441	0.0313622	0.0517047	0.0311356	0.0347996	0.0433044	0.0313629	0.0348019	0.12416	0.0547808	0.0305065	0.0255964	0.022366	0.0249609	0.0280854	0.0585267	0.0542974	0.0279556	0.0385104	0.0273219	0.0275795	0.0506658	0.0450528	0.0338317
ENSG00000117000	0.00468819	0.00711338	0.0034268	0.00651386	0.00185084	0.0206318	0.00151776	0.00218147	0.00434738	0.00348383	0.00143038	0.00765615	0.00393952	0.00280054	0.00235665	0.0086372	0.00548326	0.00661229	0.00372376	0.00447427	0.00272658	0.00451765	0.0182456	0.00555069	0.012299	0.0013827	0.0116545	0.00478795	0.00451623	0.00741171	0.00512156	0.00380845	0.00566314	0.0040702	0.00453303	0.00549768	0.00207879	0.0015295	0.000151052	0.0111427	0.0237004	0.00775555	0.0131154	0.00448786	0.00510644	0.0136253	0.00128307	0.00436779	2.54197e-05
ENSG00000259943	0.0249172	0.0133846	0.0161244	0.0109829	0.00974939	0.0217953	0.0125234	0.00924237	0.0269824	0.0144586	0.0161582	0.0259358	0.0421934	0.0134587	0.00938993	0.0279759	0.0435121	0.00879203	0.01686	0.0153249	0.0201799	0.0122189	0.0115219	0.0131061	0.0137602	0.0173245	0.0150795	0.0301922	0.0153045	0.0207866	0.0370989	0.0186743	0.0160435	0.0410375	0.0235739	0.0266075	0.0180238	0.00850203	0.0158831	0.00933197	0.0133913	0.0275108	0.0151526	0.0187151	0.0196739	0.0194603	0.00191779	0.033667	0.00658979
ENSG00000084073	0.00629805	0.00954022	2.54197e-05	0.00986627	0.00015464	0.0161421	0.00248854	0.00753332	0.00655063	0.0101359	0.00641225	0.00546168	0.00987421	0.00561037	0.00674584	0.00375768	0.0055994	0.00855579	0.0105999	0.00539257	0.0131204	0.0060011	0.0140446	0.0117598	0.00851987	0.00696911	0.00989322	0.00940111	0.00807769	0.00924169	0.0123078	0.00620504	0.0074901	0.0106317	0.0105228	0.00726152	0.00751769	0.00416468	0.00379117	0.00186544	0.00865429	0.0086672	0.0108927	0.00966446	0.0063595	0.00445354	0.00212901	0.00471646	0.00829348
ENSG00000049089	0.0805149	0.0258551	0.00114847	0.00548483	0.0123274	0.00547265	0.00371906	0.0654798	0.0486615	0.0597014	0.0187932	0.0737786	0.0210463	0.00828114	0.00861829	0.00827454	0.0348129	0.0331268	0.0391041	0.00663251	0.00598738	0.00495228	0.00449745	0.0157466	0.0170571	0.070273	0.0882524	0.0550578	0.0227301	0.0158156	0.0273831	0.021212	0.00988195	0.0377432	0.0259152	0.0702471	0.00752769	0.00844255	0.00703236	0.00664526	0.00511406	0.0664539	0.00999702	0.0431142	0.0598678	0.00553572	0.0197784	0.0334305	0.0446922
ENSG00000084070	0.0105978	0.00615767	0.0040763	0.00400472	0.00399987	0.00658424	0.0133067	0.0060072	0.0107998	0.00778622	0.00320477	0.000367417	0.00508151	0.00604188	0.00803074	0.00956142	0.00450679	0.009014	0.0103272	0.0152959	0.0121783	0.00328206	0.0163625	0.00660116	0.021375	0.00123986	0.007167	0.0101183	0.00967672	0.0107254	0.00785937	0.00580964	0.00934138	0.00347437	0.00980586	0.00853848	0.00612061	0.00928846	0.00228027	0.00792035	0.00553419	0.00858743	0.00648979	0.0051365	0.0131858	0.00451415	0.00559622	0.00785716	0.00825521
ENSG00000187815	0.068021	0.0283547	0.0251154	0.0441381	0.0410221	0.0376949	0.0455832	0.00927366	0.0304748	0.0550492	0.0152664	0.0224989	0.069453	0.0531952	0.0148222	0.0397459	0.0457934	0.0320869	0.0246415	0.0272899	0.0732283	0.0494826	0.0389768	0.015858	0.0522242	0.0182874	0.064959	0.0588516	0.0415058	0.0330445	0.109875	0.0442666	0.0497726	0.0664155	0.0479882	0.0434655	0.0550188	0.0385621	0.115738	0.0215641	0.0319919	0.0645239	0.0488959	0.0491432	0.026101	0.0491835	0.00646874	0.0188086	0.0187044
ENSG00000238287	0.0744192	0.0532416	0.0345444	0.00698436	0.0236374	0.0336157	0.0322093	0.0268404	0.0348568	0.0597144	0.014517	0.0600126	0.0682594	0.0712553	0.00926093	0.0501543	0.0564523	0.0500607	0.0495246	0.0136345	0.03435	0.0712257	0.0347604	0.0544019	0.0492301	0.0115354	0.0649102	0.0604773	0.0518088	0.0137333	0.0688634	0.02528	0.0682385	0.0939838	0.0522369	0.0496782	0.0321876	0.0125698	0.0322669	0.023967	0.0576907	0.059893	0.0514487	0.0286822	0.0574063	0.0213675	0.0516685	0.0592307	0.0220165
ENSG00000164002	0.0220869	0.010077	0.0181064	0.0317195	0.00551669	0.0393605	0.01396	0.02198	0.0167702	0.0229491	0.00735403	0.0113978	0.023383	0.0108766	0.00308159	0.0197045	0.0222152	0.0269736	0.0204853	0.0170442	0.0184849	0.021972	0.0280732	0.0100856	0.0189409	0.00752707	0.0177882	0.0368804	0.0410592	0.0189018	0.019764	0.0154122	0.0264712	0.0672316	0.0131115	0.0313271	0.0391563	0.015216	0.0205579	0.0333475	0.0256963	0.0144127	0.0100348	0.0210649	0.0190466	0.0276908	0.0182681	0.0169964	0.0204055
ENSG00000117010	0.0236811	0.0197205	0.015273	0.0501146	2.54197e-05	0.0619006	0.00713462	0.0177904	0.00951604	0.0430262	0.0123925	0.0168736	0.019243	0.00642296	0.00515368	0.0213511	0.0153593	0.0158632	0.0216523	0.0197789	0.0171593	0.0279883	0.0495969	0.0059862	0.0218258	0.01136	0.0580848	0.00781932	0.0146376	0.0120394	0.0284556	0.00860463	0.0120117	0.0369123	0.0123976	0.0111093	0.0141604	0.015326	0.0140789	0.00496318	0.00471043	0.0232011	0.00929647	0.042697	2.54197e-05	0.00989626	2.54197e-05	0.0250376	0.0179233
ENSG00000117016	0.0418699	0.00291844	2.54197e-05	0.00216831	0.0031929	0.011045	0.00569072	0.00221812	0.00700768	0.0204994	0.0604072	0.0229244	0.0215196	0.0137892	0.0315897	0.00790232	0.029223	0.00120223	0.0249465	0.00300007	0.00219535	0.00106277	2.54197e-05	0.0118442	0.00604964	0.0279737	0.0267101	0.034667	0.0155528	0.0076888	0.0183564	0.0163812	0.0398093	0.0339259	0.0133747	0.00311202	0.0022883	0.00323808	0.00152009	0.00583809	0.00739534	0.0148566	0.00439428	0.0117207	0.0201686	0.051996	0.00547501	0.00132032	0.000375709
ENSG00000272145	0.0529652	0.0353394	0.0205175	0.0386183	0.0437952	0.0462479	0.0454325	0.0111369	0.0221202	0.0461032	0.0294349	0.0481535	0.127665	0.0331422	0.0246456	0.0491965	0.0496438	0.0353	0.0236352	0.0463222	0.0475548	0.0460314	0.036101	0.0231805	0.0325041	0.0137132	0.0420483	0.0441032	0.0451889	0.0210371	0.0713506	0.0259166	0.0331722	0.296839	0.0352844	0.0371603	0.0412351	0.0326442	0.0437378	0.0446993	0.0321745	0.0543049	0.03802	0.0402337	0.0156827	0.0253694	0.00642312	0.0597569	2.54197e-05
ENSG00000066136	0.0062526	0.00456761	2.54197e-05	0.00927713	0.00267509	0.0052282	0.0138739	0.00266246	0.00336902	0.0025477	0.00292543	0.00642781	0.00334866	0.0039116	0.00157549	0.00252599	0.00358311	0.00559696	0.00649156	0.00165117	0.00164912	0.0108226	0.00364658	0.00337898	0.00458614	0.00355407	0.00471771	0.00372032	0.00473919	0.00413951	0.00392527	0.0028982	0.00279075	0.00499989	0.00625899	0.00302723	0.00551051	0.00378323	0.00577287	0.00327637	0.0131709	0.00162731	0.00120072	0.00581562	0.00213052	0.00473282	0.00162592	0.00542429	0.00221865
ENSG00000117013	0.0188176	0.00683683	0.00935675	0.0193893	0.01351	0.0190737	0.0164186	0.00450414	0.00555431	0.0190016	0.107597	0.0360344	0.0145037	0.0126247	0.0117189	0.00534043	0.0141505	0.00925329	0.0124963	0.0182341	0.00805765	0.0178388	0.090656	0.00539894	0.00502548	0.0294946	0.0216206	0.023811	0.0306502	0.0114415	0.0241438	0.0234371	0.0206629	0.0328958	0.0175368	0.00663915	0.0220516	0.00833473	0.0064155	0.012102	0.320385	0.0109657	0.0205642	0.020342	0.0402803	0.00181049	0.0061312	0.00639725	0.0131723
ENSG00000179862	0.0159381	0.00747524	0.00639602	0.0152184	2.54197e-05	0.00897601	0.000295633	0.00239811	0.00852522	0.00890095	0.0907454	0.0182706	0.00561468	0.00745499	0.0073192	0.00299294	0.0217175	0.00197115	0.0139567	0.00307779	2.54197e-05	0.00204702	0.00502458	0.00237628	0.00150728	0.0459083	0.00553642	0.00446585	0.0189242	0.0118336	0.00574887	0.0244407	0.0118	0.0377752	0.00914994	0.00277162	0.00428524	0.0101184	0.00600619	0.00141603	2.54197e-05	0.0316904	0.0109906	0.0389161	0.00845727	0.000103607	0.0213843	0.00779758	0.00503586
ENSG00000171793	0.017973	0.012339	0.00405981	0.0651699	0.0104691	0.0209878	0.0100717	0.0103066	0.0122616	0.0200048	0.00443407	0.0114374	0.00273334	0.0121195	0.0112825	0.00348261	0.0181812	0.0145859	0.00954892	0.00888196	0.0240794	0.00515794	0.00307492	0.00726154	0.015028	0.00444432	0.00911587	0.00924975	0.0145815	0.0112104	0.0226325	0.017777	0.0109856	0.0477227	0.0129794	0.0175948	0.0147024	0.0147199	0.00541587	0.0131536	0.0284584	0.00663143	0.00106481	0.0141747	0.00604738	0.00292575	0.00958185	0.0110997	0.00737383
ENSG00000281207	0.00545669	0.0036639	0.00091568	0.00376415	0.00188353	0.0103053	0.00417916	0.00292847	0.00272452	0.00371821	0.0101568	0.00624791	0.00493863	0.00536513	0.00413919	0.0024965	0.00299409	0.00479271	0.00467661	0.00163215	0.00317602	0.00441198	0.000733665	0.00364431	0.00375231	0.00317967	0.00147892	0.005952	0.00487775	0.00400975	0.00421343	0.0047634	0.00659947	0.0202633	0.00620686	0.00358837	0.00166824	0.00501135	0.00302505	0.00311954	0.00265953	0.00352987	0.00192329	0.00416466	0.00351397	0.00487505	0.00716428	0.00262649	0.00384587
ENSG00000010803	0.00481085	0.00188387	0.00128216	0.00116839	0.00154589	0.0168368	0.00156294	0.00263938	0.00241394	0.003847	0.0116387	0.00510331	0.00367772	0.0047299	0.00144888	0.00291332	0.00301789	0.00373578	0.00501614	0.00262496	0.00457808	0.00571679	0.00203982	0.00298092	0.00333523	0.00412226	0.00197181	0.00592657	0.00427156	0.00347065	0.00310576	0.00388689	0.00536492	0.0164218	0.005166	0.00251521	0.00171754	0.00356618	0.00260243	0.00376827	0.00423508	0.00346364	0.00186318	0.00407282	0.00469597	0.00432881	0.00585969	0.00354793	0.00317331
ENSG00000127124	0.0147228	0.0142204	2.54197e-05	0.00677853	0.00549439	0.00291893	0.01005	0.0109035	0.0108116	0.00469395	0.00343616	0.0106114	0.00595664	0.0139384	0.00476277	0.0154079	0.00726984	0.00294536	0.0109161	0.00894566	0.00573406	0.00263459	0.00979742	0.00818019	0.00443551	0.0282308	0.0106821	0.0263151	0.0102265	0.0106183	0.00750119	0.00507626	0.00899484	0.0205888	0.0059325	0.0191474	0.00152533	0.00537119	0.00229665	0.00490873	0.00673741	0.0161281	0.0122023	0.00899553	0.0131793	0.00590536	0.0081355	0.0128444	0.00453612
ENSG00000198815	0.00246465	0.00420385	0.00912722	0.01157	0.000707412	0.00240984	0.00802843	0.00474285	0.0038305	0.00365068	0.00107422	0.00413728	0.00313416	0.00235588	0.00360787	0.000818066	0.00197335	0.00201853	0.00382967	0.00158646	0.00723943	0.00643411	0.00700646	0.00456865	0.00229609	0.00195277	0.00566283	0.00181645	0.00340849	0.00265306	0.00269529	0.00306244	0.00188796	0.0215614	0.00153331	0.00245426	0.0136969	0.00161347	0.00269101	0.00394554	0.00661217	0.0022936	0.00110641	0.00390483	2.54197e-05	0.00448152	0.00100807	0.00389647	0.00399949
ENSG00000127125	0.00268495	0.00220855	0.000442507	0.00837505	0.000451726	0.00561007	0.00464729	0.00355621	0.000573922	0.00197668	0.00324759	0.00158232	0.00362096	2.54197e-05	0.00189321	0.00175781	0.00281273	0.00224032	0.00135783	0.00330694	0.000577566	0.00326968	0.0068365	0.00120294	0.000369783	0.00165281	0.00401855	0.00194984	0.00368371	0.00506225	0.00269066	0.00285677	0.00314883	0.00656551	0.000496572	0.00151682	0.000481032	0.00815181	0.00010535	0.0037114	0.00155863	0.00081527	0.00262671	0.00220038	0.00187258	0.000902834	0.00136925	0.00309086	0.000486302
ENSG00000186409	0.0178092	0.0242849	0.0137328	0.0124771	0.00020027	0.0163892	0.0162046	0.0162307	0.00700892	0.00441028	0.0391302	0.0131001	0.0178014	0.00120218	0.00270208	0.00655935	0.00720462	0.0324558	0.0158845	0.00437961	0.00779109	0.00577332	0.00718516	0.00694962	0.0174667	0.00975127	0.0338702	0.0104016	0.0126637	0.00711633	0.0104839	0.0160927	0.0057079	0.0403727	2.54197e-05	0.046762	0.00775936	0.00377863	0.00410912	0.0055931	0.0203941	0.00773617	0.00853346	0.00792294	0.00664752	0.00318067	2.54197e-05	0.00689377	0.00312084
ENSG00000171960	0.00707765	0.00901664	2.54197e-05	0.0141185	0.00186382	0.0636093	0.00259899	0.00608404	0.0117795	0.0162115	0.00545462	0.0088905	0.00746905	0.00620502	0.121062	0.00494596	0.0153055	0.00669242	0.0115185	0.01082	0.0154361	0.0138577	0.0167607	0.00538305	0.00413442	0.00703631	0.00770752	0.0146709	0.00558958	0.00357247	0.00777984	0.00571845	0.00362021	0.0137055	0.00708677	0.00894907	0.0165187	0.00429225	0.0113118	0.00910058	0.0137543	0.00615745	0.00742266	0.00879223	0.00380753	0.00777197	2.54197e-05	0.00660084	0.00439203
ENSG00000065978	0.00910618	0.00645798	0.0052785	0.010446	0.00847864	0.0105059	0.000461404	0.00098313	0.00206698	0.00487484	0.00210222	0.0069493	0.0071587	0.00106318	0.00243776	0.00832445	0.00609735	0.00333888	0.0113796	0.00195723	0.0378714	0.0108535	0.0102924	0.00389758	0.00804296	0.00420755	0.00594831	0.00132249	0.0296093	0.0114315	0.0108886	0.00273154	0.00475116	0.00591973	0.00706538	0.00995568	0.00745538	0.00771724	0.0111297	0.0130907	0.0156896	0.00817821	0.0136146	0.00591351	0.00218874	0.00887197	0.00712783	0.00287611	0.00142086
ENSG00000164007	0.0264216	0.0618564	0.0327667	0.0719495	0.0723541	0.0727231	0.0751857	0.0754906	0.0539542	0.0722219	0.145397	0.0802963	0.0409113	0.0672483	0.0593626	0.0575258	0.0840074	0.00791715	0.064583	0.0781157	0.0947938	0.080426	0.0761995	0.0770013	0.0522697	0.162447	0.0823874	0.0588204	0.013806	0.0606587	0.0450598	0.0976058	0.118452	0.098098	0.0558529	0.0653886	0.0779565	0.0865982	0.0788352	0.0765781	0.0527988	0.0599683	0.00927405	0.0918813	0.0682926	0.0884826	0.0360813	0.0448291	0.0613812
ENSG00000117385	0.00548218	0.00581578	0.00584316	0.0127704	0.00626975	0.0120477	0.00751361	0.00510519	0.00398136	0.00395701	0.00489927	0.0116288	0.00393661	0.00297212	0.00218403	0.00964758	0.00351809	0.00242956	0.00419631	0.0107636	0.00540396	0.00240208	0.00479195	0.00399061	0.00320572	0.00127525	0.00698963	0.0070344	0.00422279	0.00615017	0.00837382	0.0156078	0.00453575	0.0171812	0.00401759	0.00344522	0.000341181	0.000674157	0.00401878	0.00612783	0.0121858	0.013544	0.00873587	0.0062173	0.00463142	0.0054465	0.00547766	0.00543067	0.00703907
ENSG00000164008	0.04282	0.0217561	0.0204345	0.00106181	2.54197e-05	0.0205674	0.0219785	0.0355169	0.0417346	0.0583543	0.00839655	0.0290589	0.0148925	0.0118897	0.049824	0.0296283	0.053514	0.1551	0.0121515	2.54197e-05	0.0166236	0.0601936	0.0216108	0.0107278	0.00767576	2.54197e-05	0.0671514	0.022575	0.0363713	0.0529808	0.0238916	0.00947018	0.0925046	0.0353531	0.00580407	0.0121119	0.0310687	0.00495779	0.0308591	0.0241797	0.0255225	0.0372596	0.0483076	0.0134912	0.0362666	0.0290558	0.00632629	0.0286191	0.0348914
ENSG00000274386	0.0205369	0.0281116	0.0218201	0.0207844	0.00685407	0.0341765	0.0379378	0.0294811	0.0160628	0.0290698	0.0154822	0.0234576	0.016646	0.010366	0.0111816	0.0114375	0.00492436	0.0111549	0.0239988	0.0373682	0.0246174	0.00954296	0.015043	0.0234691	0.0232986	0.00454181	0.0469822	0.0208495	0.0155254	0.0352518	0.0305139	0.0233304	0.0100182	0.0668918	0.0111608	0.0207154	0.0188383	0.00991712	0.0410354	0.0149067	0.0171771	0.0199544	0.0234062	0.0247351	0.00885016	0.0168671	0.0200705	0.0180095	0.00967848
ENSG00000177868	0.034054	0.0397287	0.035534	0.0412636	0.0253354	0.0606357	0.0867841	0.0278665	0.0212537	0.103055	0.0148301	0.0553604	0.0381982	0.0416678	0.0379855	2.54197e-05	0.00631403	0.0325045	0.0304696	0.0314105	0.0479555	0.0396147	0.0425393	0.0290689	0.0644918	0.00624744	0.0376671	0.0350425	0.0307083	0.0648643	0.0740862	0.0281035	2.54197e-05	0.0895813	0.00233333	0.0699875	0.0418054	0.0224493	0.0306285	0.0417511	0.0386044	0.0373955	0.0352227	0.0557676	0.0271066	0.00844575	0.0288937	0.0828697	0.0282786
ENSG00000164010	0.0334281	0.0298928	0.000102651	0.0218152	0.0417525	0.033565	0.0201781	0.0175809	0.0120818	0.0265727	0.00515228	0.0209185	0.0211833	0.0157034	2.54197e-05	0.0172117	0.0197628	0.0304519	0.0239735	0.0362615	0.024511	0.0375696	0.0261281	0.0103819	0.0196648	0.0106136	0.0147183	0.0196315	0.0153711	0.0198514	0.023561	0.0113494	0.0112575	0.0454531	0.0122894	0.0288686	0.0344481	0.0414106	0.0376757	0.0274808	0.0209971	0.011848	0.0350109	0.0172076	0.0165706	0.0239003	0.00874948	0.0162944	0.0177692
ENSG00000228192	0.292789	0.216191	0.169132	0.214168	0.242947	0.228025	0.2274	0.17387	0.194967	0.0939481	0.00725654	0.101313	0.174078	0.154759	0.0336743	0.153315	0.146872	0.185996	0.174589	0.216365	0.189233	0.203629	0.198143	0.157567	0.203552	0.162652	0.228658	0.101221	0.125185	0.131942	0.174008	0.0865235	0.0988095	0.163163	0.124644	0.291719	0.214647	0.236992	0.218088	0.17451	0.245948	0.146349	0.158194	0.160273	0.149298	0.120604	0.12868	0.131185	0.105743
ENSG00000164011	0.0333665	0.0165678	0.00658873	0.00235572	0.0484381	0.0188743	0.00695772	0.0121941	0.00265691	0.00878981	2.54197e-05	0.00970925	0.0335527	0.00920591	0.00248066	0.0219201	0.015292	0.00921434	0.00600101	0.0239609	0.0293678	0.00208786	0.021639	0.00923314	0.00449555	2.54197e-05	0.0212688	0.00840681	0.00977134	0.000704577	0.0103312	0.00886656	0.0106295	0.0451925	0.0112611	0.00892039	2.54197e-05	0.0164299	0.0383273	0.00959428	2.54197e-05	0.00550229	0.0131529	0.0116726	0.00561063	0.00113758	0.00194864	0.00278762	0.00656967
ENSG00000117394	0.00807649	0.0040023	0.00898689	0.00200531	0.00360432	0.00275478	0.00241727	0.00134129	0.00349345	0.0115384	0.0094037	0.0571771	0.0110425	0.00549332	0.00294583	0.00972218	0.00789599	0.00633734	0.00590718	0.00184477	0.00256649	0.00236266	0.0028947	0.00508539	0.00320821	0.00355613	0.0308869	0.0107364	0.00227063	0.00336911	0.0114997	0.00430031	0.00824665	0.00688994	0.00852254	0.00638846	0.00189924	0.00130307	0.00205992	0.00201908	0.00452409	0.00343733	0.00830586	0.0106028	0.00312618	0.00418983	0.0033761	0.00272684	0.00548444
ENSG00000117395	0.00807889	0.00136957	0.000381695	0.00216554	0.00149309	0.00259277	0.00158404	0.000594874	0.00164324	0.00258145	0.00235574	0.000864447	0.0476156	0.00154153	0.000709323	0.00303504	0.00213367	0.00285378	0.00263739	0.00346503	0.00086765	0.000434917	0.00333725	0.00192643	0.00229508	0.00157715	0.00241538	0.00689678	0.00265534	0.0102776	0.0281108	0.002432	0.00231558	0.00963718	0.0032268	0.00146061	0.000355258	0.00204045	0.00257286	0.00218259	0.00166329	0.0018674	0.0284036	0.108989	0.00293734	0.0024363	0.00107969	0.00285349	0.00128898
ENSG00000243710	0.421994	0.893867	0.16017	2.54197e-05	0.0525585	0.00442243	0.014004	0.550318	0.601276	0.0857539	0.0545999	0.0286204	0.237211	0.12126	0.00402352	0.267904	0.116321	0.607254	0.148516	0.0421474	0.0147732	0.00342927	0.0204088	0.127984	0.604534	0.429297	0.106175	0.0208524	0.246759	0.0461697	0.26099	0.248141	0.0187202	0.3698	0.187879	0.587076	0.0144376	0.119688	0.0134805	0.0104863	0.0677749	0.267508	0.071416	0.0506321	0.188204	0.0275566	0.139101	0.103216	0.213162
ENSG00000066056	0.0168311	0.0124077	0.0137753	0.0180931	0.0340332	0.015206	0.0171464	0.0190429	0.0107815	0.00503387	0.300532	0.0218208	0.0140195	0.00533997	0.00141434	0.00872634	0.0129467	0.00818257	0.01429	0.0181177	0.0195757	0.0137203	0.0209443	0.0077068	0.0108623	0.0511101	0.0107124	0.00459013	0.00986887	0.00725233	0.0165391	0.00189521	0.0120908	0.0492675	0.00373043	0.0148953	0.023394	0.0153293	0.0264314	0.0227777	0.0113479	0.0110082	0.00804999	0.00832093	0.00664308	0.0145129	0.0141535	0.00755106	0.0069686
ENSG00000066322	0.00844602	0.00958812	0.0169834	0.0214838	0.0103758	0.0133033	0.00458789	0.0295569	0.0135798	0.00453664	2.54197e-05	0.000271323	0.0153981	0.00579537	0.0145522	0.0210565	0.00226726	0.00367165	0.0244074	0.0124712	0.0114896	0.0110836	0.012018	0.00686244	0.0164916	0.00105769	0.00988899	0.0129277	0.0159575	0.00607272	0.0124826	0.0291411	0.00598213	0.00607168	0.0400431	0.00658889	0.00624957	0.0129904	0.00367073	0.0318718	0.00640417	0.00710324	0.0144606	0.0192789	0.025822	0.0158151	0.00697209	0.00952582	0.00209586
ENSG00000159479	0.023778	0.0116014	0.016449	0.0093808	0.00414221	0.0106845	0.00383738	0.0109869	0.00944762	0.0110867	0.0146249	0.0146053	0.0124883	0.00936861	0.0108334	0.0162041	0.0163101	0.00905764	0.0238653	0.0184607	0.00806017	0.00715223	0.00331157	0.0155284	0.0104152	0.00841233	0.0158474	0.0136309	0.0251716	0.0139066	0.0149114	0.0114742	0.0149714	0.0258612	0.0132084	0.0158171	0.00629078	0.00858616	0.00644102	0.011683	0.00708067	0.00814835	0.00160533	0.0182791	0.0183364	0.0121927	0.0132138	0.0122698	0.00879509
ENSG00000229431	0.00578648	0.00505861	0.00326323	0.00431727	0.00582483	0.013957	0.00434212	2.54197e-05	2.54197e-05	0.0131355	0.0062875	0.00451688	0.00460315	0.00677358	0.00265892	0.0157001	0.00655597	0.0019946	0.00517938	0.00585587	2.54197e-05	2.54197e-05	0.00150614	0.00787931	0.0028485	0.00113619	0.00857797	0.0091686	0.0110734	0.00492014	0.00993726	2.54197e-05	0.00373704	0.0174954	2.54197e-05	0.00920999	0.0041121	0.00287957	0.00126122	0.0126189	0.00246866	5.70946e-05	2.54197e-05	0.00689882	0.00212185	2.54197e-05	0.00542812	0.0004032	0.00139195
ENSG00000198198	0.00831832	0.00482245	0.00196709	0.00991763	0.00466766	0.00734974	0.00763177	0.00693605	0.00658327	0.00832034	0.00957206	0.00904923	0.00794096	0.00435579	0.00266318	0.00403126	0.00574472	0.00704845	0.00752162	0.00881444	0.00792084	0.0066681	0.0084404	0.00693061	0.00648595	0.00601327	0.0092918	0.00787857	0.00627833	0.00648407	0.00658521	0.00513438	0.00535105	0.00942232	0.00629061	0.00816097	0.00814167	0.00589247	0.00666389	0.00670619	0.00737723	0.0076189	0.0110147	0.00702453	0.00774552	0.00536367	0.00489122	0.00732042	0.00825408
ENSG00000142949	0.00199414	0.00691925	0.00248987	0.00120302	0.00344648	0.00209986	0.000761862	0.0013172	0.00395484	0.00992603	0.103094	0.00325362	0.00228041	0.00175371	0.000980965	0.00347871	0.00140972	0.00815406	0.00255117	2.54197e-05	0.000207584	0.00207142	0.00242511	0.00150115	0.00285179	0.0020793	0.0260919	0.00682495	0.00270855	0.00176922	0.00247875	0.022533	0.00144522	0.0394149	0.0356599	0.0108727	0.00102197	0.00211173	0.000766952	0.00151064	0.00220711	0.00248734	0.00219582	0.00218922	0.00354543	0.00208656	0.00163885	0.00160515	0.00190103
ENSG00000066135	0.0185642	0.0132691	0.00711775	0.0234081	0.00565743	0.0259357	0.0135907	0.00330837	0.00932476	0.0222891	0.00239635	0.0156052	0.00788817	0.00444846	0.00295497	0.00792789	0.0134109	0.00795773	0.00874587	0.00166319	0.00815575	0.0169365	0.0291004	0.00564496	0.00999358	0.00278633	0.0274187	0.0108613	0.00850517	0.00776688	0.00581953	0.0139335	0.00926499	0.0276455	0.00782576	0.016349	0.010716	2.54197e-05	0.00826359	0.000427977	0.00868448	0.00773785	0.0193395	0.00493942	0.00331371	0.00405284	0.00188512	0.00455916	0.00161923
ENSG00000236200	0.0297319	0.00978748	0.023563	0.0183985	0.0100039	0.0560387	0.0135445	2.54197e-05	0.0325344	0.0345381	2.54197e-05	2.54197e-05	0.024123	0.0183319	0.0524197	0.000723989	0.0189121	0.00242043	0.0708433	0.0148936	0.00660021	0.0157364	0.0197984	0.0027058	0.0126188	0.0236408	0.0373202	0.015002	0.025622	0.0997211	0.0298891	0.0378424	0.0159465	0.0397059	0.0258134	0.00382017	0.0151092	0.0133517	2.54197e-05	0.0163913	0.00118297	0.0195833	0.0626716	0.0207255	0.02483	0.0165915	0.005583	0.0281264	0.0184957
ENSG00000126091	0.00555022	0.00408761	0.00187449	0.00124468	0.00609942	0.0016625	0.000739518	0.00216705	0.00371619	0.00722298	0.00575465	0.0104768	0.0142136	0.00630892	0.00489724	0.0261292	0.00869293	0.000664134	0.0071538	0.00152205	0.0022674	0.00180423	0.00536025	0.00526025	0.0040708	0.00487169	0.00532497	0.0104049	0.00635862	0.00826896	0.0142147	0.0065692	0.0112585	0.0344727	0.00807091	0.00432927	0.000186186	0.0030962	0.00144348	0.00294854	0.00605152	0.0148646	0.0133713	0.0120673	0.00507403	0.00242439	0.0121039	0.0559348	0.00523015
ENSG00000117407	0.0804746	0.0767054	0.0388919	0.0755114	0.0663085	0.0897952	0.0788635	0.0296859	0.050787	0.0879933	0.138708	0.0480141	0.0663546	0.036753	0.0263288	0.0494348	0.0481243	0.0770591	0.0628719	0.0836989	0.0817968	0.0753928	0.0779491	0.0275684	0.0400365	0.0781851	0.0981974	0.0737416	0.0623779	0.0205177	0.064492	0.0627989	0.0423524	0.132446	0.0620061	0.0676799	0.0709108	0.0730049	0.0741459	0.0808434	0.0710164	0.0406918	0.0694935	0.0281385	0.0439701	0.0189301	0.0488325	0.0535976	0.0544891
ENSG00000117408	0.00587014	0.00464646	2.54197e-05	0.00483816	0.00317649	0.00560385	0.000822745	2.54197e-05	0.00463711	0.00503919	0.00254864	0.00863939	0.00568292	0.00550579	0.00140895	0.00590246	0.00661209	0.00412435	0.00668215	0.00285961	0.00230219	0.00336035	0.00279789	0.00275752	0.00277697	0.0015264	0.0075948	0.00835768	0.0066133	0.0104222	0.00820352	8.59984e-05	0.00361959	0.0360238	0.00266679	0.00661474	0.00362208	0.00047026	0.00130352	0.00227139	0.00233909	0.00323121	0.00848617	0.00766661	0.00254751	0.00151756	0.0052624	0.00380069	0.000962364
ENSG00000132768	0.00728581	0.012025	2.54197e-05	0.006105	0.000134107	0.00074733	0.00255146	0.00951301	0.0105197	0.0053345	0.00204514	0.0108864	0.00383843	0.00604944	0.00294702	0.00915996	0.00497992	0.00728707	0.00484696	0.00948982	0.00348611	0.00237882	0.0215526	0.00428869	0.00270722	0.0019387	0.00366392	0.00429291	0.00675813	0.00317421	0.00790051	0.000313941	0.00743357	0.0164489	0.00614839	0.00863024	0.00609001	0.00140264	0.00551092	2.54197e-05	0.00961711	0.00140636	2.54197e-05	0.00406131	0.0110395	0.00448452	0.013305	0.0036327	2.54197e-05
ENSG00000117410	0.0133491	0.0150995	0.0242407	0.0251024	0.0158652	0.0126324	0.0140076	0.0263863	0.0180893	0.0261484	0.0108779	0.0150029	0.0128949	0.0111638	0.0117091	0.0101806	0.0120528	0.0166614	0.0103931	0.0107888	0.0112922	0.0121535	0.0162527	0.0111978	0.0220835	0.0169375	0.0311372	0.0157904	0.0142928	0.0153012	0.0128515	0.00783334	0.0118381	0.00798651	0.007966	0.0191301	0.0274192	0.0113723	0.0130415	0.0131681	0.0120051	0.00898034	0.00901427	0.0085552	0.00700642	0.0103774	0.00662149	0.0132221	0.0220556
ENSG00000117411	0.00389068	0.00318834	0.000162643	0.00283671	0.00290093	0.00286125	0.00326253	0.00239342	0.00185605	0.00524827	2.54197e-05	0.00636306	0.00255353	0.00476775	0.000210166	0.00501616	0.00367688	0.00581035	0.00534889	0.00348888	0.00201947	0.00355606	0.0047713	0.00379093	0.00347296	0.00206261	0.000308878	0.000912031	0.00390435	0.0020464	0.00339693	0.00382794	0.00509516	0.0339858	0.00620246	0.0110706	0.00100684	0.00435808	0.00448766	0.00121367	0.00741364	0.0032615	0.00894245	0.00304204	0.00210658	0.0035485	0.00411385	0.00491767	0.00118604
ENSG00000159214	0.0447812	0.0408172	0.0283167	0.0453761	0.0220488	0.0101477	0.0293496	0.0301597	0.0378238	0.0441321	0.059873	0.0426477	0.0172391	0.0172308	0.00694875	0.0150963	0.00138762	0.0368441	0.0347272	0.0246795	0.017945	0.0332023	0.0279061	0.0316138	0.0204476	0.040929	0.048463	0.039082	0.0478569	0.036844	0.0206811	0.0221424	0.0458881	0.0357384	0.0125151	0.0428879	0.0509045	0.0339743	0.0415456	0.0183947	0.0237824	0.0562761	0.0535238	0.0148775	0.0187592	0.064715	0.039271	0.0304028	0.025376
ENSG00000196517	0.0173058	0.00988051	0.045657	2.54197e-05	0.00719538	0.00449565	0.0157996	0.00887436	0.00443552	0.0197126	0.00617471	0.0172003	0.00508616	0.00960099	0.00684425	0.00430739	0.0101375	0.00658098	0.0235132	0.00298288	0.00445348	0.0131049	0.0110038	0.00937287	0.0147386	0.0060854	0.0354752	0.0288109	0.0271784	0.0274031	0.00473762	0.0180143	0.0213489	0.0446205	0.013822	0.00503701	0.00371137	0.0183742	0.00888244	0.00369076	0.0100536	0.00695839	0.0335993	0.00837231	0.0191845	0.0463166	0.0100755	0.00980142	0.00423963
ENSG00000178028	0.00590245	0.00458769	2.54197e-05	0.00836141	0.0017233	0.00962451	0.00358103	0.00546808	0.004344	0.00669447	0.00373458	0.0038618	0.00410189	0.0031722	0.00144552	0.00345292	0.00710456	0.0071697	0.00262871	0.00968459	0.00479094	0.00366267	0.00850103	0.00374572	0.00411283	0.00185562	0.00619543	0.00330441	0.00218716	0.00380806	0.00429972	0.00409519	0.00134319	0.0162605	0.00196473	0.00511805	0.011303	0.00161437	0.00160043	0.00185793	2.54197e-05	0.00272535	0.00823973	0.00580353	0.000297581	0.00349522	0.00578985	0.00293567	0.000485471
ENSG00000117419	0.00550297	0.00414291	0.0257141	0.0238217	0.00975439	0.00900424	0.0197188	0.0138072	0.00711742	0.00633373	0.00353754	0.00425328	0.00683853	0.00943	0.00263167	0.00696076	0.0180217	0.00912224	0.00357631	0.00585624	0.0163637	0.0137312	0.0256297	0.00698019	0.00201551	0.00769878	0.0124375	0.00901462	0.0075168	0.00819427	0.00898647	0.014772	0.00704951	0.045996	0.00496635	0.00681164	0.0077121	0.00580773	0.0211945	0.00177884	0.00660818	0.00651519	2.54197e-05	0.0119491	0.00575835	0.00375917	0.00169777	0.00740942	0.00735009
ENSG00000187147	0.00345401	0.00291504	0.00120705	0.00279783	0.00202432	0.00702785	0.00745306	0.00316907	0.0049154	0.00544341	0.00201439	0.00319411	0.00148308	0.00217489	0.00229274	0.00334144	0.00413751	0.00246088	0.0026508	0.00498387	0.00305895	0.00628168	0.00883165	0.00345666	0.00478978	0.00501042	0.00143836	0.00260316	0.00293034	0.00304911	0.0022281	0.00188937	0.00324163	0.00391144	0.00547763	0.00435141	0.00332411	0.00226873	0.00441195	0.00388029	0.01265	0.00162601	0.00815197	0.00337929	0.000970113	0.00186145	0.0060758	0.00227866	0.00320256
ENSG00000126106	0.00275008	0.00250636	0.00100116	0.00186196	0.00159406	0.00561917	0.00433603	0.0029188	0.00425028	0.00454639	0.00205032	0.00317584	0.00142705	0.00182761	0.00223876	0.00269857	0.00348942	0.00178068	0.00238274	0.00276992	0.00158175	0.00328379	0.00430351	0.00323508	0.00409512	0.00432874	0.00116725	0.000875082	0.00259494	0.00278012	0.0020145	0.00219826	0.00304003	0.00384414	0.00396081	0.00382958	0.00176547	0.00196977	0.00186906	0.00231909	0.00507597	0.0015255	0.00582605	0.00296045	0.000791728	0.00103952	0.00607455	0.00207352	0.00253611
ENSG00000198520	0.159828	0.130063	0.100022	0.0587955	0.0370426	0.0163597	0.021274	0.110094	0.117021	0.153865	0.0784171	0.132265	0.128601	0.080354	0.00468867	0.123004	0.117223	0.119826	0.130661	0.0278807	0.062534	0.0183257	0.044264	0.114162	0.115579	0.146485	0.179592	0.0702794	0.0904279	0.0632621	0.132199	0.0735927	0.0961797	0.0362452	0.0345759	0.157125	0.0555094	0.0563145	0.0405625	0.0263508	0.0336312	0.134741	0.0971487	0.0334061	0.0385127	0.0260755	0.094739	0.118504	0.0937864
ENSG00000142937	0.0142678	0.0196096	0.00733007	0.0235266	0.0201944	0.0107126	0.00561943	0.0253012	0.0134132	0.0119202	0.00810991	0.0172001	0.0098205	0.0181028	0.00886876	0.0100255	0.0163947	0.0112471	0.0117251	0.00776905	0.0135556	0.0204204	0.00990276	0.0101969	0.0117635	0.0103943	0.0199868	0.0101441	0.00761099	0.0188438	0.0207173	0.0130575	0.0275569	0.00853239	0.00753453	0.0142014	0.0212641	0.02885	0.00675299	0.0105179	0.00580866	0.0139589	2.54197e-05	0.0118827	0.0273002	0.0114089	0.00947321	0.0101325	0.0152736
ENSG00000173846	0.0173091	0.0154534	0.00281817	0.0188338	0.0140935	0.0305408	0.0133826	0.00909594	0.0156955	0.0234131	0.00999974	0.0201506	0.0165023	0.0113032	0.0158765	0.00737901	0.0142664	0.0130038	0.0123406	0.00683159	0.00913041	0.0100413	0.00215421	0.0103617	0.0103949	0.0147885	0.0226009	0.0238205	0.00995921	0.0190292	0.0110213	0.00938606	0.0104753	0.0136167	0.00943722	0.0159572	2.54197e-05	0.0137147	0.0153774	0.0171648	0.0284621	0.0108556	0.00493094	0.0149314	0.0289898	0.0120269	0.0144682	0.00810591	0.0144937
ENSG00000222009	0.0407092	0.0251408	0.0426162	0.0540661	0.062542	0.0587954	0.0472507	0.0674718	0.0340856	0.0202893	0.0560976	0.0620427	0.0637538	0.0294413	0.0267677	0.0439618	0.0246621	0.01803	0.0322114	0.0138697	0.0444856	0.0325173	0.0409235	0.045973	0.0373686	0.0194429	0.0279205	0.0883072	0.0321351	0.0643575	0.0448397	0.0602407	0.0351455	0.0458207	0.016873	0.0411277	0.052476	0.0549203	0.043873	0.0505322	0.0410058	0.0491051	0.0471977	0.0270622	0.0378886	0.0304216	0.0655445	0.030916	0.037344
ENSG00000117425	0.0148184	0.0224848	2.54197e-05	0.016236	0.00715899	0.0157043	0.00714158	0.00665401	0.00529763	0.0533637	0.0492103	0.0173774	0.00895246	0.0196426	0.00681909	0.0114969	0.0181933	0.00705535	0.0132826	0.0126059	0.00536156	0.00902477	0.0383396	0.00810092	0.0100394	0.0223831	0.0300731	0.0196143	0.00394173	0.0163319	0.00855784	0.0398493	0.0127313	0.0394326	0.00966728	0.0153158	0.00717871	0.00485901	0.0093658	0.0108231	0.0477914	0.023661	0.0192843	0.0224562	0.00928707	0.013084	0.00861645	0.00994956	0.00200391
ENSG00000070785	0.00615226	0.00658866	0.00187088	0.00929217	0.000420601	0.021325	0.00924231	0.00510145	0.00435474	0.00377924	0.00279779	0.00436704	0.00563573	0.00722404	0.00202572	0.00268746	0.00711108	0.00524049	0.00349706	0.0068703	0.00538117	2.54197e-05	0.0237072	0.00422549	0.00319143	0.00409294	0.00595081	0.0100812	0.00520526	0.0115458	0.00651292	0.00909471	0.00719259	0.0398283	0.00546109	0.00669025	2.54197e-05	0.00911107	0.00678635	0.00260838	0.00931017	0.00888399	0.00148055	0.0115586	0.00445584	0.0094448	0.00585488	0.0048021	0.00694816
ENSG00000126107	0.00190024	0.00216189	0.00123878	0.000826662	0.000730556	0.00145235	0.00501946	0.00137492	0.00191487	0.00114119	0.00264944	0.000579761	0.00268361	0.00103951	0.00271794	0.000311701	0.00234985	0.00151839	0.000862427	0.000163554	0.000581407	0.00202712	0.00525955	0.000827563	0.00258748	0.0016463	0.000664711	0.00340594	0.0018914	0.00349438	0.00151288	0.00134561	0.0021146	0.00590968	0.00152181	0.00260038	0.00194776	0.00127915	0.000540246	0.00112427	0.0041008	0.00158469	0.00138452	0.00140161	0.00129345	0.000907422	0.00127939	0.00143976	0.00224927
ENSG00000126088	0.00795438	0.00197572	7.30516e-05	0.00071431	0.000567019	0.00565283	0.00216468	0.00658438	0.0033822	0.00512234	0.00324298	0.00514788	0.00606937	0.00305703	0.00485395	0.00416166	0.00346563	0.00346	0.0046411	0.000303149	0.000850984	0.00269515	0.00189022	0.00154307	0.00483315	0.00164394	0.00163352	0.002633	0.00558418	0.00853469	0.00717931	0.0080323	0.00263214	0.0156639	0.00118543	0.00558117	0.00400907	0.00257324	0.00140409	0.00440721	0.00964606	0.000687975	0.00285404	0.00485089	0.00429142	0.00134522	0.00772523	0.0051947	0.0061362
ENSG00000162415	0.0375193	0.0292593	2.54197e-05	0.0181785	0.0075162	0.0191121	0.0113318	0.0120698	0.0114215	0.0153101	0.0430911	0.0187671	0.0259858	2.64192e-05	0.00562295	0.00232119	0.035315	0.0209983	0.0410939	0.00133044	0.00891161	0.014838	0.0180476	0.00896321	0.00828746	0.0414345	0.0283199	0.0324271	0.0149513	0.0131882	0.0211824	0.015356	0.0121185	0.0544751	0.00694378	0.0285222	0.0224014	0.00580188	0.028353	0.000846747	0.0166665	0.0123429	0.0287498	0.0205142	0.00324996	0.00604882	0.0045679	0.00268155	0.00358687
ENSG00000132781	0.0142733	0.0091569	2.54197e-05	0.00764018	0.00352501	0.00781144	0.00211557	0.00701653	0.00399402	0.016178	0.00862657	0.00826799	0.0109413	0.00245042	0.00773348	0.00067709	0.00667859	0.00289144	0.0110951	0.00533679	2.54197e-05	0.0106261	0.0174931	0.00958546	0.00912199	0.00116231	0.0149978	0.0152652	0.00582924	0.0119443	0.00826173	0.00699811	0.0082805	0.016932	0.010241	0.00548019	0.0125853	0.00141539	0.00801441	0.00700166	0.0128717	0.00832953	0.02251	0.0108706	0.00270546	0.00929986	0.00803627	0.00341241	0.000293629
ENSG00000132773	0.015645	0.0187079	0.01532	0.0219793	0.0247456	0.0272706	0.0202704	0.0167079	0.0066993	0.00932241	2.54197e-05	0.0282281	0.0216686	2.54197e-05	2.54197e-05	0.00264988	0.019375	2.54197e-05	0.0174612	0.0224303	0.0217208	0.0216037	0.0206328	0.021811	0.0169522	0.00183158	0.0164205	0.0247745	0.0265957	0.0384773	0.0240474	2.54197e-05	0.0235982	0.0204389	0.00537519	0.0100548	0.0187253	0.00485892	0.0190171	0.0225225	0.0184812	0.0109961	0.0301529	0.0229689	0.0144857	0.028872	2.54197e-05	0.0183874	0.0434069
ENSG00000070759	0.0102631	0.0110548	0.00818529	0.0227264	0.0115277	0.0199866	0.0119264	0.0096239	0.013331	0.0248928	0.00469627	0.0318852	0.00424892	0.00829231	0.00307837	0.005089	0.0117353	0.00823408	0.0118423	0.0197203	0.00459985	0.0254001	0.0121062	0.00192935	0.010047	0.0145196	0.0189426	0.0104998	0.00865553	0.00309378	0.00503688	0.00989468	0.0154993	0.00820183	0.0153753	0.00813397	0.00535448	0.00797984	0.00280338	0.0111936	0.019249	0.00684087	2.54197e-05	0.00778755	0.00655969	0.0195212	0.00700647	0.0133192	0.0121644
ENSG00000280670	0.893867	0.893867	0.769706	0.812951	0.893867	0.805276	0.839901	0.875867	0.99152	0.813344	0.337448	0.283644	0.893867	0.893867	0.409165	0.893867	1.03302	0.929898	0.893867	0.825785	0.818893	0.547892	0.570064	0.893867	0.893867	0.835926	1.29532	1.05861	0.893867	0.893867	0.893867	0.84193	0.893867	1.28578	0.893867	0.893867	0.862559	0.893867	0.870232	0.867662	0.485526	0.999141	1.08908	0.893867	0.723779	0.893867	0.783941	0.893867	0.811815
ENSG00000132763	0.0105086	0.00172439	2.54197e-05	0.00658806	0.00177102	0.0192466	0.00500264	0.0102896	0.00110805	0.00733301	0.00834475	0.0138349	0.00198879	0.000486385	0.0079243	0.0118769	0.0136242	0.0143927	0.0112762	0.00810121	0.00940825	0.00651065	0.0286757	0.00704685	0.0130739	0.00479081	0.0121215	0.00697679	0.0118831	0.0149374	0.00808426	0.00581713	0.0091137	0.0585895	0.00355428	0.0285906	0.0153117	0.00500217	0.00558059	0.00128797	0.0379532	0.00427017	0.0188151	0.00688007	0.000269169	0.0101612	0.00234492	0.0147439	0.00722121
ENSG00000117450	0.05625	0.0667584	0.0300536	0.0360395	0.0121795	0.0329179	0.024177	0.0279685	0.0260092	0.0450834	9.34193e-05	0.0689097	0.0135199	0.0199802	0.0265928	0.0138606	0.0278602	0.118762	0.0224984	0.0329959	0.0332138	0.0301278	0.0454359	0.041768	0.0347676	0.0462502	0.0624173	0.0500594	0.0782045	0.0621787	0.0345405	0.0321438	0.0732773	0.0904268	0.102994	0.0747992	0.0342451	0.0105349	0.0230487	0.0364878	0.0452065	0.0275986	0.0497652	0.0221199	0.0493217	0.0567953	0.00420042	0.0506891	0.0210298
ENSG00000117448	0.00600973	0.00839978	2.54197e-05	0.000336926	0.00909612	0.00444955	0.00408636	0.00414652	0.00603444	0.00397882	0.00822606	0.00702332	0.00559024	0.0101114	0.00591975	0.00785581	0.0105363	0.010758	0.00717885	0.00163323	0.0042187	0.00544331	0.00174704	0.010542	0.00514432	0.00315892	0.0104295	0.00984256	0.0125277	0.0174292	0.00775142	0.0222786	0.0155989	0.0169998	0.00842106	0.00596231	0.00802852	0.0119181	0.00209981	0.00174485	0.00664617	0.00578387	0.0115501	0.0168034	0.00810342	0.0127366	0.00862589	0.00714061	0.0135205
ENSG00000132780	0.00369521	0.00274651	0.00400867	0.0063964	0.00220529	0.00467726	0.00431239	0.00350009	0.00252839	0.00322281	0.00807692	0.0034598	0.00416521	0.00318126	0.00472709	0.00340632	0.00390996	0.00200423	0.00265669	0.00346903	0.00426197	0.00313664	0.00509274	0.00311616	0.00276986	0.0047166	0.00464799	0.00236849	0.00311376	0.0022571	0.0029442	0.00312527	0.00262733	0.00709606	0.00176481	0.00404018	0.0032553	0.00293203	0.00322958	0.00271638	0.00419183	0.00453764	0.00163784	0.00368428	0.00406795	0.00178915	0.00473892	0.00535705	0.00284439
ENSG00000159588	0.0176886	0.0372662	0.0145457	0.0413396	0.00696745	0.0279041	0.0339642	0.0144628	0.0228949	0.025769	0.0142654	0.0275408	0.03757	0.0152918	0.00709779	0.00995065	0.0284823	0.0352473	0.0122456	0.016186	0.047252	0.0372286	0.0291667	0.0145163	0.00922298	0.0429215	0.025472	0.00569317	0.0104694	0.00819561	0.0272398	0.0067371	0.00692264	0.00641281	0.0100027	0.0367042	0.0372407	0.00725868	0.0379037	0.0377477	0.0500049	0.0125223	0.00778289	0.00616236	2.54197e-05	0.0168379	0.0167026	0.0103065	0.00971348
ENSG00000159592	0.00255077	0.0040945	0.00150495	0.0060857	0.0027978	0.00648433	0.00263853	0.00361686	0.00324218	0.00338699	0.00423142	0.00441695	0.00302087	0.00228262	0.00154115	0.0025952	0.00317746	0.00466131	0.00362914	0.00281011	0.00355096	0.0061118	0.00225146	0.00416804	0.00278669	0.00278071	0.00330579	0.00307175	0.00402532	0.00223576	0.00291733	0.00339143	0.00409135	0.00408197	0.00218259	0.00445173	0.0049613	0.00263515	0.0032429	0.00287505	0.00305846	0.0026702	0.00378355	0.00232096	0.00177917	0.00225157	0.00315944	0.0030446	0.003363
ENSG00000159596	0.0202169	0.0146463	0.0145062	0.00513911	0.00543217	0.03739	0.0109856	0.0205585	0.0170584	0.0241707	0.00502038	0.0387528	0.0113313	0.0299782	0.00285798	0.00568895	0.017113	0.0143829	0.0139643	0.0239864	0.0157585	0.021853	0.0516274	0.0113221	0.0118896	0.0123009	0.00201086	0.0163613	0.0197014	0.023821	0.0267406	0.00732159	0.010891	0.0144806	0.00498193	0.0275558	0.0210966	0.00975046	0.0274902	0.0312009	0.0148808	0.00878169	0.0380719	0.0129832	0.0255212	0.0100907	2.54197e-05	0.0155733	2.54197e-05
ENSG00000197429	0.013605	0.0125211	0.00961579	0.0155404	0.00577988	0.00899536	0.00810866	0.00601074	0.00931333	0.0148457	0.00882818	0.0104116	0.0100888	0.00891165	0.0024551	0.0110576	0.0107813	0.0182121	0.0128855	0.0078189	0.0042118	0.0119262	0.0194676	0.00921657	0.0105286	0.00866247	0.012828	0.00815631	0.0125893	0.00762081	0.0147467	0.00889807	0.019559	0.016856	0.00695157	0.0112687	0.00109356	0.00614178	0.00970145	0.0126918	0.0103733	0.00806714	0.00413136	0.0108898	0.0091376	0.0124711	0.00511945	0.00898153	0.00359344
ENSG00000086015	0.00408677	0.0141417	0.0032708	0.00277383	0.00192687	0.00227532	0.000846273	0.00911973	0.00575412	0.00772343	0.00126025	0.00366834	0.00327438	0.00370408	0.00168822	0.00651062	0.00503571	0.00992293	0.00390868	0.00401637	5.00482e-05	0.00285337	0.00336635	0.00432095	0.00739661	0.00617073	0.00880897	0.00776989	0.00276046	0.00341011	0.00288062	0.00208041	0.00455791	0.0164034	0.0015718	0.00928932	0.00229373	0.00101051	0.00179317	0.00251283	0.0179666	0.00278458	0.00485026	0.00407531	0.00441136	0.00705305	0.00291563	0.00658457	0.0122786
ENSG00000117461	0.0107707	0.011986	2.54197e-05	0.011972	0.00335678	0.0200672	0.012151	0.0132323	0.0107917	0.00707645	0.0201646	0.00161469	0.0213322	0.0182131	0.000853173	0.0162616	0.0101073	0.00582097	0.0104088	0.0109114	0.00765824	0.00894249	0.00284635	0.0137699	0.0110077	0.0274421	0.00477872	0.0203729	0.0143056	0.00867209	0.0194518	0.00863855	0.0106919	0.0312469	0.0108567	0.0171751	0.00372971	0.00391992	0.00971333	0.0110056	0.0118303	0.0100021	0.0140126	0.00683687	0.0226052	0.0178425	0.00306329	0.0191953	0.0140121
ENSG00000085998	0.00644261	0.00399682	0.00113089	0.00666608	0.00520665	0.00725882	0.00160123	0.00605594	0.00434835	0.00638174	0.00283484	0.00451941	0.00410212	0.00229991	0.00212772	0.00450551	0.00626334	0.00476563	0.00629567	0.0060128	0.00342071	0.00286267	0.00687397	0.00282088	0.00228752	0.00192438	0.00357921	0.00369361	0.00428759	0.00544152	0.00761569	0.00586634	0.0062091	0.0193323	0.00361443	0.00876352	0.000217644	0.00727075	0.00340562	0.00633741	0.00427983	0.00285813	0.00275326	0.00466508	0.00902652	0.00478433	0.00277989	0.00276643	0.00548929
ENSG00000132128	0.00363673	0.00534002	0.00261777	0.0174119	0.00823952	0.00624316	0.0143992	0.00412328	0.0012074	0.00286243	0.00257241	0.00240848	0.00429857	0.00677829	0.00265338	0.00416251	0.00398061	0.00490403	0.00206043	0.00321853	0.00483727	0.00272544	0.0192359	0.00317897	0.00332712	0.00144016	0.00486187	0.0087332	0.00197819	0.00319807	0.00147197	0.00184718	0.00310085	0.0049357	0.00435134	0.00236989	0.00262004	0.00658868	0.00320083	0.00150348	0.00181655	0.00534293	0.00274639	0.00485838	0.000692627	0.00306882	2.54197e-05	0.00313898	0.00215992
ENSG00000173660	0.0368224	0.0566373	0.035583	0.0517505	0.0451482	0.0434786	0.0485081	0.0409001	0.0343177	0.0364726	0.0277101	0.0394577	0.0328313	0.0268852	0.0318532	0.0431049	0.0395775	0.0475878	0.0411257	0.0419498	0.0305786	0.046527	0.0439467	0.0287528	0.0345326	0.0326379	0.0346109	0.0298393	0.0377357	0.0304384	0.0399956	0.021942	0.0344419	0.0226548	0.038927	0.0562202	0.0399597	0.0427597	0.0383145	0.0496223	0.0496243	0.0329675	0.0311495	0.0461274	0.0497727	0.0338405	0.0261436	0.0285892	0.0468215
ENSG00000117481	0.00389522	0.00700545	0.00579403	0.00304275	0.00493146	0.00943334	0.00552075	0.00162106	0.00407741	0.0078985	0.0165837	0.00656963	0.00451543	0.00136298	0.0108264	0.00631903	0.00645304	0.00658666	0.00682815	0.00565246	0.00552862	0.000659306	2.54197e-05	0.00329483	0.00394698	0.00421579	0.0113577	0.00778054	0.00237807	0.00310327	0.00315739	0.00382027	0.00295728	0.0428178	0.00593427	0.00511674	0.00707548	0.00530106	0.00464909	0.00534238	0.00151567	0.0045686	0.00741459	0.00627239	0.00211108	0.00292455	0.00292923	0.00666624	0.00175125
ENSG00000117480	0.0369873	0.0492576	2.54197e-05	0.00969174	0.0108903	0.0143125	0.0123775	0.0359985	0.0448752	0.0321737	0.103104	0.00926421	0.0320706	0.0097599	0.0112008	0.0255258	0.0440433	0.0581549	0.0191076	0.0246753	0.0172359	0.0136809	0.0208286	0.0118011	0.0458423	0.13597	0.0713388	0.0117774	0.0210672	0.00917672	0.044008	0.0949948	0.0108897	0.160434	0.0298471	0.0387687	0.0142242	0.0122206	0.0172489	0.0157364	0.0190024	0.0491415	0.0212168	0.0379201	0.0402415	0.0258501	0.00389947	0.0136833	0.0511292
ENSG00000269956	0.00484016	0.00529724	0.00384831	0.0165308	0.00311055	0.013364	0.00832782	0.00495756	0.00225572	0.00347566	0.0113754	0.00461201	0.00891641	0.00701304	0.00360939	0.00200844	0.00386386	0.00372414	0.00887695	0.0133677	0.0109413	0.010533	0.00561538	0.00461322	0.00695484	0.00541847	0.00434026	0.00666877	0.00543265	0.00501929	0.00906913	0.0158371	0.00229966	0.0297528	0.00158274	0.0107643	0.00450771	0.00575907	0.0175159	0.0102394	0.0336417	0.00657593	2.54197e-05	0.0125024	0.00398601	0.00936841	0.00153387	0.00379769	0.00355277
ENSG00000079277	0.00355905	0.0050666	0.00611834	0.0120553	0.0103101	0.00844062	0.00539981	0.00681232	0.00675896	0.00597753	0.00796669	0.00454534	0.0061028	0.00640667	0.00270068	0.00317993	0.00560738	0.00435097	0.00430895	0.00554365	0.0055793	0.00567668	0.000320205	0.00751146	0.00787281	0.00653634	0.00550652	0.00671028	0.00406825	0.00569827	0.00731427	0.0106371	0.00444605	0.0216975	0.00611164	0.00905394	0.00207563	0.0139549	0.00865975	0.00690193	0.0193354	0.00454666	0.00409368	0.015029	0.00267782	0.00418494	0.00297081	0.00636421	0.00313372
ENSG00000142961	0.00544968	0.0055554	0.00388628	0.0107064	0.00699463	0.0260279	0.014328	0.0135419	0.00724421	0.0099022	0.00705916	0.0101454	0.00865938	0.00475559	0.0129066	0.00639677	0.00413569	0.00482144	0.00763975	0.0133715	0.00947744	0.00178664	0.0172433	0.0105354	0.00867073	0.00749001	0.0180699	0.0140792	0.0148049	0.011826	0.00985582	0.00993718	0.00810644	0.0150302	0.00969155	0.00609568	0.0202603	0.0126775	0.00393339	0.0155944	0.0359129	0.00783627	0.0140811	0.00316901	0.00502859	0.00708986	0.00636869	0.00535729	0.0114864
ENSG00000123472	0.00235538	0.0048737	0.000889312	0.00766565	0.00165658	0.00672888	0.000928118	0.003687	0.0058678	0.00850747	0.00397538	0.00426098	0.00736002	0.0025235	0.000431737	0.00581814	0.00760246	0.00857261	0.00425844	0.00339439	0.0040689	0.00383916	0.00322087	0.00536822	0.00440998	0.00555374	0.0124403	0.00543579	0.00439611	0.00542461	0.0029977	0.00480909	0.00441382	0.0255351	0.00707242	0.00358075	0.00304413	0.00252843	0.00285366	0.00305518	0.00352455	0.0048386	0.00305854	0.00532485	0.000904923	0.00214405	2.54197e-05	0.00526425	0.00276469
ENSG00000228237	0.00426256	0.0052937	0.00484764	0.00655639	0.00373055	0.00654486	0.00188053	0.00463707	0.0025572	0.00614541	0.00333051	0.00679225	0.00598056	0.00488051	0.0088293	0.00579347	0.00565212	0.00457557	0.00377934	0.00528495	0.00526118	0.00580308	0.00309399	0.00720498	0.00455228	0.00260194	0.00646477	0.00959242	0.00255484	0.00549351	0.00438928	0.00448168	0.00341757	0.0066321	0.00681679	0.00473266	0.00589794	0.00782773	0.00605956	0.00387319	0.00467216	0.0154706	0.00601508	0.00487329	0.00264099	0.00524437	0.00404003	0.0074738	0.00240679
ENSG00000159658	0.00265759	0.00334139	0.00215153	0.00388461	0.00222003	0.00459583	0.00133734	0.00269982	0.00177829	0.00310017	0.00110053	0.00463129	0.00419303	0.00246943	0.00458426	0.00417141	0.00324678	0.00232947	0.00221848	0.00352294	0.00330699	0.00411293	0.00145805	0.00458344	0.00298706	0.00139072	0.0049188	0.00648871	0.00155252	0.00403736	0.00241846	0.0034491	0.00209085	0.00566752	0.00415548	0.00308914	0.00435289	0.00555901	0.00450661	0.00244759	0.00333703	0.0127854	0.00573314	0.0027196	0.00120865	0.00380352	0.00410754	0.00556403	0.00217226
ENSG00000142973	0.0623068	0.192185	0.0699584	0.251995	0.342203	0.266862	0.242356	0.102018	0.0978836	0.105201	0.812535	0.0697799	0.121715	0.161655	0.0670819	0.126152	0.152236	0.150119	0.0919994	0.253364	0.29285	0.242796	0.341878	0.13567	0.101842	0.472891	0.0707716	0.513842	0.0485346	0.0419532	0.0872499	0.487902	0.102276	0.525416	0.121301	0.108306	0.246953	0.321674	0.256035	0.288269	0.273673	0.155033	0.102198	0.188007	0.107173	0.0762412	0.0894145	0.14545	0.0840055
ENSG00000154198	0.0342843	0.0635652	0.0379444	0.142654	0.143913	0.15656	0.0730623	0.0622191	0.0434784	0.082343	0.231758	0.164056	0.0414479	0.0809754	0.0557502	0.0558322	0.0387081	0.0130467	0.0310984	0.0720208	0.0778206	0.0662842	0.142745	0.0411993	0.0511114	0.172607	0.0265852	0.157391	0.0323521	0.0273222	0.0496547	0.170922	0.0384951	0.195289	0.0739232	0.0640748	0.131785	0.149742	0.0732957	0.0641041	0.144239	0.0455263	0.0528651	0.0383585	0.159205	0.0551217	0.0330332	0.0627369	0.0605608
ENSG00000187048	0.0455236	0.540896	0.407219	0.407816	0.470069	0.457198	0.409254	0.619594	0.580686	0.621803	3.5637	0.43914	0.498708	0.417983	0.499091	0.459742	0.463239	0.484663	0.427322	0.423828	0.450119	0.339465	0.41617	0.678791	0.564917	1.54272	0.572463	0.138465	0.0363148	0.6369	0.473887	0.791198	0.548718	0.927707	0.578394	0.465645	0.371619	0.468956	0.380584	0.348521	0.515686	0.540403	0.287308	0.551492	0.596516	0.648786	0.441791	0.405016	0.463548
ENSG00000186377	0.018694	0.00650707	0.0280464	0.00246679	0.00471968	0.00831835	0.0122982	0.0565801	0.0427006	0.0232526	0.158444	0.056337	0.0237294	0.0636676	0.0184353	0.0203064	0.0254541	0.0025306	0.0206507	0.00673965	0.0138652	2.54197e-05	0.00796354	0.0286288	0.0332158	0.0767617	0.0421251	0.0042963	0.0147366	0.00538496	0.0172456	0.0542397	0.0239425	0.116666	0.0145952	0.0133129	0.0229132	0.0103767	0.00541139	0.00532062	0.00908673	0.019835	0.0238747	0.0241458	0.039445	0.0195437	0.0348282	0.0077229	0.0159361
ENSG00000186160	0.0500942	0.0591294	0.0691159	0.0430136	0.0495691	0.0424226	0.04552	0.120113	0.0787163	0.0813829	0.261221	0.134729	0.0723729	0.105097	0.0149793	0.0742776	0.0629798	0.0476995	0.0361976	0.0419698	0.0286704	0.0211333	0.0496579	0.116155	0.10158	0.380431	0.0408266	0.0907796	0.049967	0.0343678	0.0788331	0.175488	0.0599604	0.459522	0.103994	0.0515613	0.0269164	0.0480776	0.0599356	0.0367494	0.0822532	0.0327041	0.020358	0.0661711	0.141873	0.0691777	0.0420203	0.0966132	0.106118
ENSG00000225506	0.0435697	0.0288261	0.0587013	0.0376322	0.0687479	0.033347	0.018797	0.0730927	0.0608914	0.0988994	0.148542	0.0688441	0.0722291	0.0486945	0.00425708	0.112475	0.0751054	0.051794	0.0383873	0.0493477	0.0246397	0.0303572	0.038268	0.0395313	0.0903941	0.0209522	0.0471183	0.464805	0.0438697	0.046969	0.0626491	0.0646276	0.051311	0.0661229	0.0379164	0.0306561	0.0421753	0.0580432	0.0634558	0.0172312	0.038732	0.0396626	0.893867	0.0574438	0.0436012	0.0393704	0.078488	0.123176	0.0502492
ENSG00000162365	0.179625	0.209608	0.165178	0.197045	0.207955	0.215002	0.196516	0.287971	0.213761	0.256861	0.561259	0.266312	0.215761	0.221665	0.18159	0.220172	0.170433	0.194683	0.146082	0.190716	0.187361	0.166072	0.230091	0.312896	0.210649	0.639009	0.220025	0.481047	0.134958	0.226267	0.202543	0.643614	0.251469	0.747747	0.2408	0.196076	0.175807	0.216315	0.172904	0.175811	0.259562	0.226429	0.893867	0.149055	0.312362	0.230939	0.192282	0.211467	0.235161
ENSG00000162367	0.00523045	0.0260411	0.00796978	0.00452759	0.0127334	0.0108006	0.00819766	0.00883453	0.00865903	0.00759441	0.029422	0.0116543	0.0241089	0.0040999	0.00247135	0.00102939	0.00509154	0.00318421	0.00968803	0.00505369	0.00331665	0.00947514	0.01299	0.00271508	0.00799718	0.0391307	0.00552416	0.0184154	0.00903132	0.0143602	0.00626311	0.000959759	0.00587873	0.0177702	0.00204365	0.00825362	2.54197e-05	0.0119766	0.0141521	0.0101836	0.00542687	0.010772	0.0115141	0.00463656	0.0165013	0.0170742	0.00150136	0.00917453	0.00602943
ENSG00000226252	0.0761073	0.101339	0.0804738	0.0866023	0.113264	0.0838064	0.0991071	0.0898297	0.0779647	0.0835334	0.781425	0.122644	0.111398	0.0851148	0.0104549	0.0750407	0.0503749	0.0798614	0.0573101	0.093989	0.0909371	0.0848426	0.081173	0.094639	0.0757215	0.405822	0.0871097	0.104417	0.0764263	0.0722857	0.108775	0.074024	0.074376	0.193681	0.085079	0.103883	0.0948675	0.104752	0.0945568	0.093243	0.0732288	0.0959794	0.0764084	0.0427435	0.0926468	0.0800938	0.100098	0.0927658	0.0653971
ENSG00000162368	0.00581512	0.0132091	0.00168743	0.00218156	0.00226819	0.00303364	0.000938068	0.00375986	0.00373708	0.00288983	0.00164307	0.00193947	0.00256158	0.00236652	0.00422663	0.00172516	0.00547705	0.00583368	0.00590908	0.00119374	0.00127953	0.00527346	0.00135752	0.00234134	0.00362476	0.00143308	0.00324156	0.00356068	0.00644453	0.00341735	0.00524432	0.00226203	0.00175124	0.00531902	0.00149502	0.00779644	0.00184709	0.00167368	0.00223788	0.00293506	0.0039431	0.00233286	0.00156813	0.00328789	0.00267471	0.00416476	0.00210949	0.00342075	0.00273785
ENSG00000225762	0.0502599	0.0620039	0.0596871	0.0882409	0.0121819	0.0882231	0.0794946	0.0713583	0.0758506	0.0998493	0.041508	0.0651551	0.0290693	0.0247522	0.0299342	0.0520956	0.0391183	0.0686171	0.0426357	0.0627574	0.0796878	0.077451	0.103635	0.0275836	0.0797642	0.0618147	0.111128	0.0437351	0.0682624	0.0678772	0.0698203	0.0325094	0.073696	0.0790131	0.0667966	0.106345	0.070466	0.0204222	0.0631364	0.0682628	0.0874254	0.0468673	0.0590838	0.0707896	0.0732072	0.0704029	0.0315621	0.0644315	0.0700733
ENSG00000269113	0.016669	0.01701	0.00288914	0.013655	0.0102102	0.0144912	0.0137343	0.00915112	0.0069182	0.00794894	0.112268	0.013326	0.0144263	0.012103	0.00267081	0.00871219	0.0189953	0.00377632	0.0179924	0.0143552	0.016033	0.0135536	0.0244531	0.0103166	0.00758399	0.0386455	0.0315696	0.0159186	0.0076704	0.0114516	0.0117212	0.018697	0.0174078	0.0794457	0.0238132	0.00725659	0.0135488	2.54197e-05	0.0151032	0.0156595	0.0166406	0.0158291	0.0173176	0.0153057	0.00959526	0.00505493	0.0094226	0.00645187	0.0137446
ENSG00000117834	0.124172	0.151351	0.130643	0.190516	0.190199	0.185152	0.193027	0.10839	0.113646	0.117637	1.15844	0.0363157	0.0403545	0.0727306	0.00953156	0.122626	0.128164	0.0966563	0.104196	0.202311	0.229169	0.197867	0.175247	0.115817	0.111178	0.235914	0.118359	0.56494	0.105671	0.111614	0.0410767	0.0735525	0.108075	0.0361075	0.100835	0.138214	0.209011	0.159857	0.2082	0.212856	0.153769	0.101571	0.0705183	0.187491	0.104098	0.162686	0.0838401	0.090559	0.0844376
ENSG00000132122	0.0107575	0.0131431	0.00254622	0.0357879	0.0283518	0.0261306	0.0259496	0.00694139	0.0109172	0.0164905	0.0759214	0.014225	0.00867436	0.0138658	0.00149201	0.00467224	0.00860624	0.0130209	0.0140804	0.0204183	0.012864	0.00999357	0.023622	0.0134282	0.00731527	0.0152242	0.0505179	0.250003	0.0102069	0.0123196	0.0123475	0.0134584	0.00956719	0.283739	0.0188761	0.0120383	0.0387109	0.026601	0.0311024	0.0232987	0.0220201	0.0130115	0.0308322	0.0099667	0.0106941	0.00732007	0.00300892	0.00950586	0.0111506
ENSG00000186094	0.021931	0.00777133	0.0117464	0.0110329	0.0206591	0.0108916	0.0222876	0.00566047	0.0201179	0.0121516	0.0290042	0.0430595	0.0484769	0.0115176	0.0039891	2.54197e-05	0.0230554	0.0177167	0.0161344	0.0103626	0.0042139	0.00490845	0.0150538	0.0123293	0.0153082	0.0563919	0.019972	0.016303	0.0248496	0.0383639	0.0488556	0.0100877	0.0124745	0.0556694	0.0153861	0.0380837	0.0106146	0.0161122	0.00724754	0.00843208	0.00468725	0.0507758	2.54197e-05	0.018675	0.00388264	0.00477602	2.54197e-05	0.0177312	0.00546484
ENSG00000162373	0.0234536	0.0098684	0.0122481	0.0114459	0.0193833	0.0214286	0.0277578	0.00224355	0.0202845	0.0367678	0.0293269	0.0494419	0.0347078	0.0095313	0.0236796	2.54197e-05	0.0334136	0.0152755	0.0104186	0.0317189	0.00314747	0.0173916	0.00889077	0.0152301	0.0167399	0.037987	0.0386359	0.0453901	0.0169914	0.057856	0.0687803	0.0117716	0.0179616	0.0424892	0.0174218	0.0185936	0.0257933	0.0206218	0.0126187	0.0229685	0.0321749	0.0322953	0.00551234	0.0390592	0.00516879	0.00909499	0.00139051	0.0114862	0.00762191
ENSG00000185104	0.0112784	0.00309899	0.000795811	0.0229722	0.00860602	0.0153707	0.0241228	0.00912603	0.00534414	0.00584349	0.00602746	0.0155867	0.00838865	0.00500016	0.00935923	0.00452829	0.00762495	0.00838623	0.00834816	0.00749729	0.00938641	0.0179234	0.0089273	0.00608626	0.00739474	0.00255566	0.00361867	0.0131372	0.0108376	0.00820781	0.00726508	0.00110686	0.00807757	0.0183493	0.0026964	0.0114548	0.00728214	0.00766923	0.0143349	0.0095599	0.0117155	0.00835513	0.0312195	0.00804707	0.00406826	0.00927273	0.00344684	0.0138355	0.0105169
ENSG00000123080	0.00681832	0.00476935	0.00662153	0.0064837	0.0342635	0.00676519	0.012964	0.00608744	0.00567447	0.0100371	0.0117612	0.00872216	0.0023239	0.0016983	0.00279384	0.00481143	0.00712095	0.0123379	0.0094892	0.0258056	0.00379477	0.00255449	2.54197e-05	0.00462601	0.00290016	0.00636329	0.00555134	0.0125424	0.0134561	0.00942342	0.0139104	0.00575626	0.00757684	0.0125839	0.00666041	0.00353338	2.54197e-05	0.0411277	0.00205581	0.0134604	0.0313334	0.00973337	0.000678829	0.00714268	0.00176419	0.00433066	0.0124928	0.0168544	0.00458778
ENSG00000123091	0.0098929	0.00341395	0.00383264	0.00122962	2.54197e-05	0.000207779	0.0128465	0.00693902	0.00556303	0.00662407	2.54197e-05	0.00141808	0.00742294	0.0034878	0.0131611	0.00155344	0.00879868	0.00452166	0.00363312	0.00855966	0.00214029	0.00516782	2.54197e-05	0.00321391	0.0011991	0.00238658	2.54197e-05	0.000971768	0.0114305	0.00143529	0.0212527	2.54197e-05	0.00337875	0.0307645	0.00567404	0.00389208	0.00424922	2.54197e-05	0.00297973	0.02349	0.0176769	2.54197e-05	0.00958786	0.00429259	0.00215516	0.00154999	0.00751706	2.54197e-05	2.54197e-05
ENSG00000085832	0.0190137	0.0141941	0.0228452	0.00553126	0.00613573	0.00649227	0.00686951	0.00907857	0.00918307	0.00653044	0.00220527	0.00792342	0.0145998	0.0107201	0.00188496	0.0103462	0.00675377	0.00931444	0.0170346	0.00279023	0.00403569	0.00409261	0.00618191	0.00709103	0.0100218	0.00381753	0.0085951	0.0103046	0.0169758	0.00687163	0.0237575	0.00844297	0.00690739	0.00693406	0.00604702	0.0151029	0.00277407	0.00545284	0.00384433	0.00305201	0.00622036	0.00477951	0.00602878	0.00891511	0.00591772	0.00707528	0.0109984	0.00731975	0.0121639
ENSG00000117859	0.0125289	0.0104783	0.0100373	0.00639272	0.0144027	0.019427	0.0135372	0.00980485	0.0093062	0.0107315	0.008192	0.0101372	0.00687961	0.0100773	0.0044979	0.00512142	0.0124287	0.00784089	0.013821	0.00811448	0.00607591	0.0104979	0.00771111	0.0100742	0.00832639	0.0204699	0.0100872	0.00506204	0.0105331	0.013376	0.0112244	0.0092015	0.0109455	0.0121623	0.00634228	0.011042	0.0113912	0.00631936	0.00393207	0.0096291	0.00827389	0.00571081	0.0025544	0.0103281	0.00969967	0.00812958	0.00686755	0.0108235	0.00536005
ENSG00000078618	0.00399091	0.00288411	0.00096991	0.0030468	0.00283917	0.0033229	0.00474225	0.00251579	0.0038445	0.00228676	0.00219225	0.00439532	0.00299718	0.00294985	0.00179624	0.00282312	0.00376369	0.00414576	0.00432054	0.00647728	0.0029721	0.00471066	0.00211174	0.00246828	0.00284328	0.00456633	0.00246806	0.00648762	0.00292911	0.00365122	0.00362116	0.00406948	0.00302927	0.00365772	0.00351752	0.00353602	0.00302846	0.00363391	0.00407467	0.00539872	0.00348541	0.00297059	0.000402536	0.00320212	0.00206815	0.0033951	0.00183677	0.00294012	0.00133607
ENSG00000266993	0.00341555	0.00235315	0.00349746	0.000242061	0.00220075	0.00363368	0.00386413	0.00330616	0.00428992	0.00258124	0.000951091	0.00251422	0.00217428	0.0019635	0.00216115	0.0037672	0.00372548	0.00430965	0.00377507	0.00637913	0.00322524	0.00239992	0.00120559	0.00234328	0.00390804	0.00100187	0.000774133	0.00644059	0.00394273	0.00627699	0.00377102	0.00559382	0.0026518	0.00506606	0.00389937	0.00283632	0.00195272	0.0030212	0.000276923	0.00439951	0.00277618	0.0043274	2.54197e-05	0.00396246	0.00232506	0.00275217	0.00193748	0.00433408	0.000945038
ENSG00000117862	0.00328811	0.00736819	0.0111495	0.0145667	0.00639041	0.0104456	0.00711392	0.000917619	0.00412103	0.00888669	0.00721363	0.00267809	0.00804372	0.0039973	0.00828483	0.00486659	0.00229124	0.00337738	0.00395439	0.0105095	0.00560123	0.0106397	0.00034918	0.00317275	0.00436605	0.00296346	0.00569542	0.00477195	0.00526904	0.00166248	0.00827668	0.00424877	0.00418759	0.0110214	0.000650643	0.00658843	2.54197e-05	0.00439563	0.00541421	0.00974159	0.00883112	0.00339266	2.54197e-05	0.00366084	0.00128431	0.00802393	0.00480587	0.00721471	0.00312273
ENSG00000198841	0.012648	0.0185837	0.00886157	0.0225585	0.0184842	0.0214451	0.0271704	0.00206002	0.00885604	0.0352233	0.0074464	0.00319994	0.0242384	0.0107175	0.0179542	0.00702652	0.00505656	0.0114428	0.0101524	0.0200896	0.0193792	0.00742952	0.0208	0.00982455	0.0126412	0.00793044	0.0163762	0.014552	0.0212672	0.0222068	0.00769707	0.0105052	0.0201633	0.0608623	0.00190249	0.00925756	0.010493	0.0103303	0.0105939	0.0285789	0.0212719	0.00452754	0.0194031	0.026409	0.00485019	0.0172687	0.0120024	0.0141324	0.0143022
ENSG00000134717	0.0371656	0.071246	0.0226976	0.0461059	2.54197e-05	0.00601343	0.0780389	0.0113147	0.0498741	0.00429058	0.0550706	0.00491533	0.0167988	0.00273554	0.0243354	0.0185825	0.0169454	0.0475855	0.0495888	0.0700062	0.011254	0.0336046	0.0379436	0.00141801	0.00876838	0.0285833	0.0100113	0.13017	0.0138025	0.0229984	0.021999	0.0130954	0.0406369	0.0674134	0.030422	0.0111903	0.084657	2.54197e-05	0.030115	0.0568241	0.0435478	0.0275294	0.0325934	0.0171031	0.029521	0.0295002	0.0185822	0.0323656	0.0281114
ENSG00000157077	0.0167258	0.0181885	0.0113112	0.00673117	0.0119701	0.0059211	0.0618217	0.00320838	0.00951878	0.00667257	0.0239896	0.0255941	0.0100678	0.0092916	0.0014498	0.00551352	0.00933603	0.00757155	0.0288842	2.54197e-05	2.54197e-05	2.54197e-05	0.00403315	0.0122627	0.00481951	0.00338405	0.0111798	0.0260808	0.0116731	0.0491161	0.0263344	0.0268482	0.0195935	0.0532697	0.00801829	0.0284119	0.00388985	0.00295342	0.0139047	0.00768505	0.010169	0.0117634	0.0302191	0.0233555	2.54197e-05	0.0241504	0.0114442	0.0135515	0.000272568
ENSG00000154222	0.0191215	0.0201782	0.0119508	0.00423002	0.0127922	0.0041141	0.00829606	0.0128928	0.0158883	0.0159989	0.0233372	0.012176	0.0200006	0.012148	0.00472862	0.00618162	0.0143239	0.00477145	0.0193825	0.016023	0.0225948	0.0218581	0.01196	0.0157324	0.0195184	0.0112809	0.0183191	0.00861791	0.0191542	0.0202081	0.0239778	0.0231168	0.0120748	0.0331243	0.00373316	0.0140958	0.0189111	0.0209884	0.00649417	0.00211389	0.00078433	0.0161026	0.00450207	0.020707	0.00258279	0.0101597	0.00760976	0.0128947	0.0117913
ENSG00000134748	0.00523946	0.00802732	0.00207565	2.54197e-05	0.00482487	0.0100051	0.00827883	0.00974647	0.0117273	0.00524945	0.0260444	0.0206795	0.00759816	0.00805326	0.00174988	0.0044155	0.00727626	0.0080237	0.0086744	0.00433413	0.00516527	0.00402444	0.0107931	0.00183409	0.00310415	0.00710993	0.0122512	0.00796256	0.0101724	0.00516671	0.00518318	0.00369725	0.00766301	0.0108729	0.00362141	0.011874	0.000313505	0.00431039	0.0159178	0.00402028	0.00427321	0.00583639	2.54197e-05	0.00927989	0.00132906	0.00554234	0.00253901	0.00218514	0.00222905
ENSG00000134744	0.00454973	0.00681802	0.00644115	0.00369893	0.00464738	0.0098225	0.0038644	0.007616	0.00544211	0.00565196	0.00575616	0.00997423	0.00380551	0.00309221	0.00388709	0.00190296	0.0045234	0.00616581	0.00587862	0.00433296	0.00452567	0.0068142	0.0123398	0.00210398	0.00381744	0.00336831	0.00781571	0.00777066	0.00641545	0.00701065	0.00437274	0.00444521	0.00381629	0.00960489	0.00461651	0.00687559	0.00245167	0.00455344	0.00607612	0.00824306	0.00732024	0.00406928	0.00214308	0.00553999	0.00299522	0.00361619	0.00372845	0.00339507	0.00179358
ENSG00000116157	0.0798736	0.126151	0.0659831	0.0273203	0.0095917	0.0190563	0.0193421	0.0287126	0.0300846	0.0697219	0.320142	0.15713	0.0817402	0.0590801	0.0245988	0.0535926	0.0891661	0.0983978	0.0672346	0.0155359	0.0258554	0.00702743	0.0346058	0.0441237	0.0360947	0.222098	0.0533525	0.415733	0.0519823	0.0605139	0.0801385	0.0631706	0.0365962	0.0959676	0.0394697	0.09245	0.0263983	0.0314925	0.0176718	0.014278	0.0211242	0.0582012	0.0672531	0.11141	0.0712292	0.104987	0.268057	0.109695	0.0553617
ENSG00000162377	0.0123039	0.0143598	2.54197e-05	0.0156328	0.0177472	0.0203075	0.0131171	0.00964031	0.010314	0.0163931	0.00807622	0.0117099	0.0126841	0.0129958	0.00932557	0.0214842	0.0314305	0.0173213	0.0106526	0.0154744	0.0221798	0.0131457	0.0153184	0.00577333	0.014746	0.00635625	0.00871908	0.0099919	0.0177562	0.0235225	0.0155336	0.00948977	0.00851544	0.0555097	0.00973743	0.0208369	0.0126832	0.0122417	0.012402	0.0135637	0.0188668	0.0111963	0.0115109	0.0164622	0.00879994	0.0139547	0.00967539	0.00711957	0.00872332
ENSG00000162378	0.00622416	0.0040204	0.00753572	0.00572675	0.00146488	0.00554911	0.00952971	0.0019428	0.00167463	0.00622583	0.00984096	0.00395777	0.00496534	0.00587234	0.00203657	0.00258546	0.00264701	0.00480671	0.00602263	0.00448245	0.00452134	0.00395	0.00317937	0.00373065	0.00148175	0.000633524	0.0080014	0.0049861	0.00500625	0.00420506	0.0106662	0.00303095	0.00307348	0.0171061	0.00387191	0.00303761	0.00462969	0.00143318	0.0027275	0.0077519	0.0121313	0.00742097	2.54197e-05	0.00354454	0.00221067	0.00257824	0.00171151	0.00357175	0.00120905
ENSG00000121310	0.015072	0.0176988	0.0167946	0.0260414	0.0228957	0.0322486	0.0274208	0.0171519	0.0164866	0.0217692	0.0724909	0.00933933	0.0184565	0.0162773	0.0101375	0.019937	0.0216438	0.013393	0.0151738	0.0224795	0.0310516	0.0230897	0.0346099	0.0132645	0.0140556	0.0362668	0.0233497	0.0129702	0.0130637	0.0144268	0.0202741	0.0231761	0.0123998	0.032496	0.0200974	0.0213275	0.0335928	0.0204122	0.0387069	0.0160059	0.00859293	0.0113379	0.0201709	0.0195333	0.0139549	0.0123025	0.016392	0.0144273	0.0172002
ENSG00000116171	0.00208665	0.000812493	0.00197642	0.00162329	0.00388247	0.0023257	0.00399933	0.00214123	0.00189708	0.00379648	0.0252297	0.00322969	0.00243029	0.0014338	0.00279917	0.00101512	0.00284675	0.00178861	0.00268154	0.000698094	0.00168903	2.54197e-05	0.000883362	0.00160694	0.00119807	0.00163017	0.00365649	0.00396848	0.00326379	0.00209144	0.00269609	0.0189803	0.00242681	0.013	0.00361554	0.00262124	0.00469598	0.00609111	0.00348702	0.0015502	0.00202226	0.00109992	0.001012	0.00253299	0.00236834	0.000762706	0.00124425	0.00153767	0.000683755
ENSG00000174348	0.00604228	0.00587102	0.00659957	0.0188089	0.052717	0.0559433	0.021477	0.0101369	0.0105017	0.0100604	0.119372	0.0103654	0.00571416	0.0138479	0.0121366	0.00550354	0.00670128	0.0104294	0.00551586	0.0207678	0.0289931	0.0126529	0.00762169	0.0101741	0.00860857	0.0791277	0.00743785	0.0157184	0.00616968	0.00844294	0.00561761	0.028715	0.00695393	0.127558	0.00687079	0.00693382	0.0203891	0.0292762	0.0203168	0.0305434	0.0194409	0.00829736	0.00939349	0.00770191	0.00872243	0.0222876	0.00436884	0.0105535	0.011944
ENSG00000162383	0.0416611	0.0292638	0.0583732	0.311375	0.324457	0.352176	0.397923	0.0598795	0.0488144	0.0390721	0.283838	0.0626453	0.0554581	0.0853511	0.0244586	0.0721174	0.0395734	0.0492434	0.0486128	0.299292	0.346715	0.284366	0.347611	0.0578812	0.0383075	0.095352	0.0380249	0.141314	0.0396244	0.0490626	0.0503805	0.0436753	0.0492774	0.236574	0.0840257	0.0487178	0.277646	0.29345	0.39361	0.317725	0.278043	0.0394525	0.0801131	0.0451376	0.0499209	0.0792198	0.0609929	0.0362238	0.0428097
ENSG00000157184	0.0116019	0.00727681	2.54197e-05	0.00114882	0.00120471	0.0202425	0.00264738	0.00888446	0.00545643	0.00386841	0.000833501	0.00205974	0.0053934	0.0050836	0.00152569	0.00243992	0.008734	0.0129866	0.00669586	0.0116608	0.0233906	0.00106031	0.0135736	0.00358992	0.00850288	0.0037614	0.00356243	0.00478711	0.0108285	0.00751956	0.00603254	0.00687159	0.00428982	0.0267605	0.00240175	0.00811719	0.00497171	0.00752995	2.54197e-05	0.0123631	0.00334879	0.00199198	0.00351293	0.01024	0.00776645	0.00171739	0.00469869	0.00457033	0.0168855
ENSG00000236723	0.0208993	0.0159268	2.54197e-05	2.54197e-05	0.0122326	0.0240454	0.000845798	0.00847539	0.0151669	0.00430454	0.00576771	0.00763365	0.0102889	0.0102857	0.00486082	0.00102711	0.011806	0.0207563	0.0114831	0.0195737	0.0386637	0.000858979	0.0145478	0.00680105	0.01059	0.0055769	0.00528736	0.00868242	0.0133639	0.013472	0.0188428	0.00330161	0.0105047	0.0307227	0.00409628	0.0186435	0.0163971	0.0101872	0.00219195	0.0140492	0.0223236	0.00137272	0.00773263	0.0206354	0.0135873	0.00650475	0.0127002	0.00955586	0.0193336
ENSG00000162384	0.0197165	0.018714	0.022957	0.0201783	0.0219736	0.0259426	0.0231644	0.0196578	0.0175921	0.0211718	0.0162086	0.0186918	0.015458	0.0160498	0.00847625	0.0150662	0.0215806	0.021927	0.0162134	0.0200891	0.0214395	0.0211799	0.023912	0.0224144	0.0167192	0.0194161	0.0217421	0.0239644	0.0155506	0.0144484	0.0200208	0.0197315	0.0193655	0.027123	0.0216231	0.0234881	0.0219154	0.0227948	0.0238744	0.017769	0.0167846	0.0144639	0.0225499	0.0190916	0.0123906	0.0187965	0.0149077	0.0178595	0.0201294
ENSG00000162385	0.0232276	0.0207449	0.0157214	0.0157266	0.0143045	0.0120888	0.0110438	0.0231133	0.0126248	0.0275881	0.0091242	0.016382	0.0169706	0.0113298	0.00362481	0.0089814	0.0275334	0.00290783	0.0147643	0.00475085	0.0108567	0.0101914	0.0182158	0.0146081	0.013505	2.54197e-05	0.00971403	0.0343683	0.0142775	0.00797402	0.0213507	0.0138011	0.0365661	0.0363826	0.00645377	0.0281225	0.0104101	0.00640131	0.00973885	0.0104568	0.014869	0.0194384	0.0326902	0.0230248	0.00706698	0.0088634	0.004306	0.00902026	0.0127932
ENSG00000157193	0.038287	0.015179	0.0350649	0.0124826	0.0160908	0.0150921	0.0108632	0.0551104	0.0383631	0.0187416	0.00468228	0.0371654	0.0212372	0.0250186	0.00366501	0.0138052	0.0249508	0.0315995	0.0522972	0.00691309	0.0104723	0.00977046	0.00725591	0.0218604	0.0562134	0.0140963	0.031027	0.210317	0.0328243	0.0323723	0.0239526	0.00938304	0.205501	0.0169976	0.020734	0.0197057	0.00996504	0.0167894	0.0110319	0.00576575	0.0205031	0.00771444	0.00566471	0.0260946	0.0339154	0.0070881	0.00777071	0.0279429	0.0112977
ENSG00000174332	0.0337912	0.0526433	0.0149559	0.0135586	0.0825847	0.0180587	0.0167359	0.0473276	0.0488238	0.0343617	0.172009	0.0548016	0.0165451	0.0367764	0.00598122	0.00876849	0.0189736	0.0227688	0.0298097	0.0128539	0.00808337	0.00620495	0.0125076	0.0366453	0.0453339	0.033626	0.0536279	0.0517019	0.0366435	0.00942881	0.0148712	0.0882434	0.0435072	0.105452	0.0502219	0.0335523	0.0118583	0.0647206	0.010163	0.00936568	0.0032262	0.027679	0.00570791	0.0496526	0.233338	0.0584982	0.0115235	0.0154187	0.025891
ENSG00000058804	0.0191929	0.0522568	0.0263001	0.0286666	0.0252348	0.0231824	0.0479182	0.0388582	0.0248637	0.0232474	0.0103541	0.0552702	0.0230502	0.00882073	0.00908068	0.0315193	0.0298786	0.0280065	0.0261176	0.0528398	0.024279	0.0629496	0.0391112	0.0204597	0.0307758	0.0148886	0.0566118	0.0633673	0.0236377	0.0111382	0.0140642	0.0227176	0.0216949	0.0355579	0.0342435	0.0340847	0.017788	0.0180899	0.0355119	0.0448977	0.0383816	0.014747	0.0244377	0.011924	0.0126274	0.0157848	0.0305276	0.0212121	0.0278606
ENSG00000058799	0.0101756	0.0121912	0.00475266	0.013294	0.00381072	0.0231293	0.013358	0.00913765	0.0106944	0.0152726	0.00692892	0.0065674	0.00711859	0.00525778	0.0113047	0.00856452	0.0114567	0.0145611	0.0164057	0.0124685	0.020495	0.0194414	0.0209904	0.00654332	0.0103841	0.0167926	0.00846284	0.00355495	0.0123908	0.00898722	0.0133176	0.00742	0.00944181	0.0199395	0.00979998	0.0140702	0.0266486	0.00590313	0.0156247	0.0117826	0.0165818	0.0136952	0.0122335	0.0139729	0.00586465	0.00662076	0.00608329	0.0064501	0.0079316
ENSG00000081870	0.0318606	0.0250891	0.0322916	0.0628509	0.0189883	0.0527372	0.0264466	0.0440892	0.0298113	0.0434975	0.0170284	0.0286133	0.0320607	0.0309781	0.0196575	0.0231884	0.0200407	0.0175838	0.0221563	0.0143948	0.0315146	0.0288917	0.0402061	0.0409687	0.0326347	0.0264509	0.025864	0.0100851	0.0226729	0.0309552	0.031197	0.0220255	0.0491486	0.0262413	0.0338816	0.0256555	0.0397233	0.0309834	0.0265611	0.00940494	0.0371526	0.0240203	0.0314318	0.0333177	0.0173402	0.0536247	0.0313047	0.0402273	0.015842
ENSG00000116212	0.00820887	0.00219582	0.00371933	0.0192787	0.00562626	0.0138559	0.0062665	0.00127089	0.00364047	0.00276096	0.00113957	0.00673794	0.0039587	0.00709076	0.00211929	2.54197e-05	0.00385249	0.00571745	0.00148231	0.00634593	0.0019134	0.00174204	0.00450986	0.000767787	0.00259038	0.00119111	2.54197e-05	0.00301443	0.00112024	0.0121871	0.00435531	0.00308215	0.00414655	0.0150437	0.00181661	0.00607734	0.00892714	0.0031139	0.00724303	2.54197e-05	0.00475817	0.00251579	2.54197e-05	0.00554085	0.00403962	0.00362155	0.00618181	0.00909093	0.000398243
ENSG00000116209	0.0326812	0.047017	0.0428148	0.0496929	0.0135434	0.0206914	0.0427471	0.0257967	0.0296486	0.0288824	0.0306527	0.0272457	0.0219614	0.0177699	0.0440053	0.0363501	0.0280711	0.0428266	0.0292932	0.0240263	0.0220781	0.0213712	0.0360731	0.0259009	0.0283861	0.0418123	0.0653049	0.0464768	0.0257413	0.0640255	0.0270632	0.0129926	0.0242336	0.043737	0.0407418	0.0391098	0.0211642	0.0110044	0.0266673	0.0383844	0.0303361	0.0278137	2.54197e-05	0.0283328	0.0257215	0.0183784	0.032123	0.0278635	0.0300373
ENSG00000116205	0.022523	0.01269	0.0181299	0.00672942	0.0351125	0.0513294	0.0241051	0.0245201	0.0102569	0.0218498	0.00635368	0.0179489	0.0136456	0.0046392	0.00227136	0.0268109	0.0155842	0.013207	0.0295615	0.016773	0.0103379	0.0224217	0.0234388	0.0135672	0.0126781	0.00633874	0.0296288	0.0308572	0.0127511	0.0278142	0.0189605	0.0363361	0.0372001	0.0205592	0.00680091	0.0196011	0.0162076	0.0136158	0.00177344	0.0211521	0.0201423	0.0108756	0.0295135	0.0217665	0.0337716	0.0182088	0.0103693	0.0218537	0.0355496
ENSG00000157211	0.0710066	0.0677538	0.0577664	0.0737462	0.0623593	0.0782225	0.0754611	0.0528453	0.0533857	0.0754417	0.0788815	0.0764463	0.0584251	0.0502295	0.0531742	0.0489999	0.0460562	0.0589459	0.0528471	0.0752267	0.0552657	0.0827475	0.0872086	0.0562662	0.0554917	0.188167	0.0937401	0.0746639	0.052029	0.0569333	0.0533262	0.0253741	0.0386129	0.202767	0.0546916	0.0741734	0.059953	0.0603855	0.0567969	0.0574488	0.0770961	0.0618305	0.0679207	0.0539062	0.0603514	0.0750814	0.0726795	0.0652567	0.0577323
ENSG00000215883	0.0137951	0.012811	2.54197e-05	0.013501	0.0131622	0.00987776	0.0117008	0.00761847	0.00897998	0.0189049	0.00499829	0.0104529	0.0181213	0.0107554	2.54197e-05	0.00617381	0.0171952	0.00877821	0.0163924	2.54197e-05	0.00751191	0.0229413	0.00143036	0.00640194	0.0137034	0.00333654	0.0292473	0.00128062	0.0102785	0.0103732	0.0164449	0.0102167	0.0126559	0.0310412	0.0015723	0.017094	0.00985738	0.0107881	0.0185259	0.011527	0.00833384	0.0118435	0.0173829	0.0122344	0.0147112	0.00872539	0.00549912	0.0111526	0.00872991
ENSG00000116221	0.00253628	0.00266366	0.0108721	0.00417424	0.00289668	0.00719377	0.00310583	0.00316835	0.00285425	0.0062004	0.00082886	0.00166905	0.00149194	0.00582611	0.00719686	0.00442808	0.00253979	0.00499105	0.00356199	0.00525096	0.00562554	0.00511223	0.00235977	0.00457455	0.00292965	0.0012921	0.00421333	0.00328679	0.00581595	0.00867173	0.0017081	0.00629082	0.00878568	0.00747633	0.000715277	0.00151543	0.00630734	0.00380413	0.00456902	0.00473417	0.00517208	0.00209832	0.00483226	0.00473262	0.00725906	0.0089504	0.00321608	0.00375236	0.00556991
ENSG00000157216	0.00496648	0.00551554	2.54197e-05	0.0021708	0.00377884	0.00274724	0.00450371	0.00495678	0.00361121	0.0206094	0.00219333	0.0117475	0.00302394	0.00134087	0.00793444	0.00353347	0.0058418	0.00633761	0.0052679	0.0044547	0.00155454	0.00062892	0.00634731	0.00539919	0.00658005	0.00319697	0.0152399	0.03904	0.00378746	0.00384253	0.00331055	0.00560328	0.00405343	0.0180924	0.00570243	0.007119	0.00176422	0.00329064	0.00121261	0.0026989	0.00340157	0.0039043	0.00542951	0.00496663	0.001226	0.0021965	0.000155552	0.00697276	0.000660052
ENSG00000198711	0.0364604	0.0393686	0.0327018	0.0527227	0.0159972	0.0474899	0.0404733	0.0531103	0.0388136	0.0573516	0.0435852	0.0413572	0.0153377	0.0274473	0.0119067	0.0268447	0.0372123	0.0173834	0.0647195	0.0410282	0.0374844	0.0390731	0.0457574	0.0045745	0.0148027	0.0462883	0.0466469	0.187423	0.0212002	0.0347425	0.0277817	0.0588695	0.0440168	0.0802351	0.0427369	0.0349868	0.0464761	0.0181572	0.0338538	0.0386815	0.0432379	0.0342273	0.050864	0.0359652	0.0123317	0.038463	0.0343004	0.0254287	0.00999419
ENSG00000162390	0.0554756	0.0370448	0.0363106	0.0286018	0.00743247	0.0437045	0.0481048	0.0398847	0.0362327	0.0256224	0.129525	0.0297563	0.0298478	0.0659862	0.0222806	0.0288877	0.0493783	0.0291487	0.0548142	0.0487296	0.0566444	0.0347307	0.0418216	0.0167375	0.0402848	0.02678	0.0391137	0.160581	0.035565	0.0348547	0.0397782	0.0620051	0.0308614	0.0705482	0.101431	0.0413259	0.0441175	0.0167888	0.0460468	0.0382194	0.0692364	0.066459	0.0335709	0.0370338	0.0305404	0.0244787	0.0226635	0.0264929	0.0365239
ENSG00000184313	0.0301682	0.0127757	0.0116286	0.0156918	0.0194394	0.0251339	0.0206186	0.0190571	0.0123327	0.0484975	0.175586	0.0356196	0.0217167	0.0307327	0.00267788	0.0139957	0.0418944	0.012773	0.0247696	0.0176987	0.0166306	0.0219951	0.0227467	0.0224486	0.0122206	0.0384428	0.059184	0.0562609	0.0340115	0.0196427	0.0195417	0.05511	0.0478449	0.0724956	0.0806953	0.0148693	0.0212212	0.0182968	0.0203456	0.0122083	0.0410761	0.0298539	0.0338759	0.0479751	0.0214397	0.0200336	0.0275356	0.0358933	0.0261201
ENSG00000243725	0.0223902	0.0128028	2.54197e-05	0.0143217	0.0116727	0.0273603	0.0116566	0.0178511	0.0114555	0.0135503	0.00578106	0.0239088	0.0130157	0.0286956	0.00683671	0.0123994	0.0138028	0.0143026	0.0232089	0.00799004	0.0110418	0.0222772	0.0457172	0.00927341	0.0131463	0.00441616	0.0159519	0.0208718	0.0481589	0.0173192	0.0150797	0.0277573	0.0218059	0.0240749	0.00621845	0.0186448	0.00694089	0.0159789	0.00689688	0.0122517	0.117524	0.00543588	0.0100152	0.0253911	0.0285048	0.0124694	0.0130627	0.0123715	0.0260926
ENSG00000116133	0.014254	0.0116798	0.00693177	0.0102752	0.00383651	0.0196141	0.013557	0.0102854	0.0183312	0.00636804	0.0221079	0.00705476	0.00399239	0.00662988	0.00636563	0.00268283	0.0118153	0.0134507	0.0105539	0.00876536	0.00500402	0.0128074	0.0351408	0.00649946	0.0178325	0.0218641	0.0165103	0.00270209	0.0150813	0.00362717	0.00638584	0.00865062	0.0199956	0.0333176	0.00604997	0.00928288	0.00618514	0.00309532	0.0060865	0.00515732	0.0287204	0.00391183	0.00643972	0.00226264	0.00586035	0.0210842	0.00278309	0.00832018	0.00768593
ENSG00000242396	0.0578898	NA	NA	NA	NA	0.0943447	NA	NA	NA	NA	NA	NA	0.0218854	NA	0.0260229	NA	0.0348077	NA	0.0198487	NA	NA	0.113159	NA	NA	NA	0.0724824	NA	0.0147887	0.0533488	0.0302195	0.0706584	0.0337497	NA	NA	0.0467884	0.0303069	NA	0.0199866	0.0226598	NA	0.0955349	0.0203025	NA	0.0252017	NA	NA	0.112214	NA	NA
ENSG00000143001	0.111513	0.0951778	0.0870644	0.0971487	0.0388535	0.0740086	0.116442	0.105191	0.154751	0.639899	0.946661	0.0401564	0.054172	0.0352279	0.122243	0.231625	0.167103	0.180538	0.0550335	0.0896819	0.0996604	0.0770708	0.134518	0.0421665	0.125118	0.612472	0.61148	0.150212	0.0901818	0.0515471	0.0660592	0.113262	0.13147	0.569802	0.0871723	0.112238	0.0922997	0.0287659	0.104586	0.0850666	0.154395	0.053548	0.0183625	0.124014	0.214732	0.00464419	0.0151368	0.0468843	0.19093
ENSG00000162402	0.0130164	0.0102529	0.00419069	0.000353814	0.00240384	0.00476418	0.0030919	0.00477855	0.00445756	0.0057407	0.00592097	0.00642096	0.00725937	0.00555164	0.00221554	0.00440844	0.00541268	0.00509689	0.00933331	0.00270322	0.00494923	0.00125287	0.00479306	0.00521968	0.00600891	0.00247892	0.00421443	0.00957391	0.00828651	0.00546915	0.0108925	0.00478045	0.00673759	0.00999222	0.00355866	0.00899317	0.00225299	0.00164248	0.00201376	0.000946291	0.0074038	0.00534874	0.00960375	0.00619283	0.00488259	0.00525286	0.00912631	0.00516375	0.00521107
ENSG00000234810	0.0901708	0.0644168	0.0655068	0.0883841	0.0892306	0.0788082	0.10527	0.0822115	0.0742279	0.0766683	0.311163	0.2306	0.070479	0.0943072	0.0069891	0.0587743	0.0900351	0.0547161	0.028898	0.102841	0.132325	0.0770205	0.0672888	0.08758	0.0715868	0.0314775	0.111771	0.111531	0.0181717	0.0571667	0.0627873	0.0622436	0.0750836	0.115089	0.0985871	0.0431132	0.105838	0.0950935	0.168207	0.107827	0.0584228	0.115395	0.0970519	0.0976737	0.0701053	0.0830101	0.0582445	0.100189	0.0640606
ENSG00000260971	0.0844142	0.0514511	0.0823136	0.120272	0.0973433	0.124161	0.136967	0.0988493	0.0984774	0.121181	0.599194	0.0971518	0.0933519	0.0864555	0.0981204	0.0590819	0.0644432	0.0861194	0.090749	0.112989	0.130997	0.112602	0.110181	0.0853928	0.112134	0.114757	0.123612	0.0771721	0.0489493	0.0328673	0.0883927	0.079261	0.0367706	0.416996	0.107135	0.101817	0.134905	0.105936	0.122356	0.1214	0.1032	0.0875188	0.0643897	0.0406286	0.0686647	0.0843628	0.0674562	0.102728	0.0177294
ENSG00000162407	0.00429606	0.00815289	0.0025052	0.00397241	0.0104811	0.0108144	0.0052578	0.00352891	0.00302945	0.00359684	0.0522488	0.00470042	0.0037922	0.00174608	0.00273337	0.00323886	0.00285982	0.00793239	0.00420965	0.00354372	0.00661003	0.00603932	0.0036563	0.00360098	0.00262388	0.022119	0.00494912	0.00267607	0.00279373	0.00413997	0.00421308	0.00437066	0.00294511	0.0557163	0.00399226	0.0078088	0.00701339	0.00927496	0.00524062	0.00593055	0.00535731	0.00391024	0.00324012	0.00498298	0.0061231	0.00247798	0.00207257	0.00350267	0.00365569
ENSG00000162409	0.0140747	0.00452225	0.0116879	0.0146317	0.00484645	0.0263439	0.00591617	0.00374764	0.00259776	0.00403308	0.0889074	0.0129253	0.00591578	0.00397177	0.00905263	0.0148948	0.0100955	0.00778579	0.0163582	0.00503456	0.0071154	0.00440946	0.00477161	0.00907064	0.00372395	0.0111406	0.00339162	0.017685	0.00765103	0.0104895	0.0200421	0.037655	0.00935348	0.0664354	0.0261609	0.00836856	0.0121992	0.00495276	0.00200146	0.00541218	0.0411432	0.00646317	0.000283161	0.0145539	0.00570856	0.00752813	0.005944	0.00529768	0.00687981
ENSG00000173406	0.111966	0.160788	2.54197e-05	0.00671178	0.0133509	0.00566876	0.0286341	0.0592725	0.0720821	0.0713244	0.409783	0.176243	0.207149	0.00629462	0.0113249	0.0911753	0.14037	0.132762	0.208666	0.0352698	0.0269295	0.0026828	0.00366798	0.116457	0.0948144	0.033541	0.107356	0.0208161	0.0181222	0.0978667	0.1626	0.157407	0.164654	0.293614	0.13653	0.161133	0.0130052	0.0137746	0.00885349	0.0235654	0.0555453	0.202728	0.188826	0.220941	0.0831194	0.153415	0.114078	0.0517121	0.0833797
ENSG00000162600	0.0405902	0.0355336	0.0222732	0.00853995	0.0201753	0.0117805	0.0079591	0.0305285	0.0268727	0.0264318	0.0203339	0.0161992	0.0129163	0.0168789	0.0120634	0.0256794	0.0322431	0.0277598	0.0292505	0.0051318	0.0101115	0.0157674	0.0116662	0.0216162	0.0308602	0.0159519	0.018313	0.0320214	0.0127922	0.0242322	0.02059	0.022708	0.0240367	0.0318538	0.0110436	0.0403683	0.0193586	0.0166511	0.0082067	0.00601916	0.0228422	0.00989715	0.0125937	0.0284203	0.0206395	0.020593	0.0128347	0.0203656	0.0291365
ENSG00000184292	0.100481	0.0899221	0.00965612	0.235988	0.334367	0.243681	0.225827	0.360341	0.250455	0.273737	0.235501	0.00901028	0.00529877	0.140309	0.0790023	0.0150466	0.181197	0.120758	0.0644898	0.242448	0.307091	0.239226	0.214221	0.17453	0.121915	0.0882837	0.313276	0.0885773	0.0427438	0.013343	0.00477199	0.0900524	0.084737	0.431099	0.101224	0.240308	0.245799	0.309291	0.25166	0.263014	0.250454	0.0101759	0.0108615	0.0367623	0.134301	0.161294	0.0192272	0.0602687	0.764225
ENSG00000162601	0.00519993	0.00593881	0.00295086	0.00901456	0.0087019	0.00979862	0.011901	0.00699703	0.00560029	0.00663395	0.00347907	0.0057709	0.00487269	0.00800202	0.00549765	0.00427395	0.00595826	0.00727397	0.00529643	0.00748206	0.0109671	0.00624064	0.00961027	0.00575274	0.00586784	0.00515137	0.00745815	0.00835904	0.00486581	0.00589222	0.00481013	0.010427	0.00546161	0.00895836	0.00726445	0.00587348	0.00748351	0.00507551	0.00701815	0.00990532	0.00706964	0.00413606	0.00737217	0.0055637	0.00497435	0.00625817	0.00574525	0.0058337	0.00498581
ENSG00000283445	0.131155	0.225493	0.124572	0.21266	0.575736	0.26713	0.538254	0.212407	0.187756	0.302376	0.745481	0.19429	0.050797	0.184206	0.063549	0.0846896	0.180493	0.186355	0.102889	0.586266	0.219934	0.396631	0.554077	0.211018	0.184288	0.133137	0.373626	0.223642	0.272483	0.0947199	0.0596358	0.228733	0.191568	0.176837	0.285576	0.256396	0.210583	0.652964	0.212458	0.577984	0.542957	0.121133	0.0897848	0.100618	0.191737	0.263437	0.0409925	0.211753	0.184182
ENSG00000177606	0.00356974	0.00514339	0.00280355	2.54197e-05	0.00171642	0.00667229	0.00049608	0.00405568	0.00289678	0.000932268	0.0152659	0.00195276	0.00309162	0.00323252	0.000832076	0.00210366	0.00147404	0.0049788	0.00273191	0.00165437	0.0020367	0.00458169	2.54197e-05	0.00153364	0.00338039	0.00342192	0.0028912	0.00367964	0.00449738	0.00306288	0.00373739	0.00599171	0.0021537	0.00410597	0.00210596	0.00315351	0.0028801	0.000962752	0.00130598	0.00426396	0.000197863	0.0045963	0.00240393	0.0022096	0.00551398	0.00246965	0.00179355	0.00236639	0.0029356
ENSG00000237352	0.153739	0.186634	0.0618942	0.130697	0.066732	0.138364	0.178295	0.147965	0.162726	0.18114	0.0134987	0.0140085	0.146093	0.0266245	0.0238898	0.0119042	0.0555224	0.253529	0.168337	0.117172	0.12715	0.15057	0.145091	0.0353698	0.0752285	0.00520933	0.182617	0.142786	0.153971	0.0383338	0.153904	0.00753534	0.0414693	0.164039	0.0938941	0.306892	0.177514	0.0681147	0.161811	0.148071	0.142684	0.0316717	0.112015	0.11514	0.0194067	0.106989	0.0670539	0.0307973	0.00517695
ENSG00000224609	0.280992	0.616765	0.783886	0.806077	1.91291	0.819426	1.4002	0.890837	0.69922	0.930578	0.906746	1.98199	0.950609	0.615267	0.0348559	0.666507	0.234656	0.532632	0.546559	1.52302	0.806299	0.88705	0.842626	0.751062	0.617081	0.862204	1.50652	1.4402	0.514516	0.891576	0.713219	1.596	0.666531	1.96354	0.626383	0.893867	0.737516	1.99652	0.859173	0.953429	1.48771	1.64529	0.775171	0.752749	0.826364	1.8178	0.741255	1.6507	0.6471
ENSG00000172456	0.0271492	0.0171135	0.00145549	0.0157078	0.00753593	0.0440255	0.0262738	0.0282883	0.0229289	0.0135953	0.00949866	0.0156419	0.0114208	0.0147848	0.00324919	0.0219318	0.0235062	0.0221527	0.0125588	0.0170055	0.0267413	0.00799671	0.0103336	0.0133111	0.0231684	0.00708124	0.027306	0.0114592	0.0123777	0.0149469	0.0204191	0.0346661	0.0141306	0.0392075	0.0144115	0.0183382	0.0150339	0.00665382	0.0430367	0.01191	0.0494444	0.0135911	0.0296571	0.0179985	0.0182626	0.00742976	0.0131566	0.021514	0.0144668
ENSG00000162599	0.00414174	0.0015554	0.00481607	0.00325995	0.00322341	0.00387349	0.00402416	0.00209703	0.00164972	0.00302152	0.0210102	0.0112781	0.0063763	0.00432776	0.00409527	0.00589678	0.00299692	0.00577315	0.00436006	0.00124858	0.00649317	0.00244918	0.00576067	0.00280687	0.00110591	2.54197e-05	0.00150576	0.00214587	0.00456976	0.0033458	0.00674068	0.00652534	0.00383539	0.0107362	2.54197e-05	0.00415881	0.00754678	0.00390999	0.00474859	0.00341134	0.00949929	0.00655776	0.00794288	0.00424385	0.00409012	0.00736207	0.00517872	0.00385899	0.0014512
ENSG00000162604	0.00747347	0.00760944	0.000449429	0.0125051	0.00190142	0.00662816	0.0070763	0.00843428	0.00563236	0.00356789	0.00312827	0.00439224	0.0056935	0.00323275	0.00462654	0.00664661	0.00351028	0.00484591	0.010262	0.00644014	0.00335166	0.00866063	0.0105838	0.00423774	0.00569828	0.00328088	0.00753182	0.011875	0.00331521	0.00386119	0.00514188	0.00394549	0.00453831	0.0245952	0.00860034	0.00631	0.0194594	0.00411755	0.000955802	0.0153672	0.00938502	0.00247775	0.00629334	0.00871758	0.0027951	0.00544589	0.00272443	0.00413143	0.00258406
ENSG00000132849	0.00942279	0.00827621	0.00491998	0.0181199	0.00776503	0.0158596	0.0116207	0.00693715	0.0102572	0.0139788	0.0159658	0.0038728	0.00404763	0.00410392	0.00546348	0.00505774	0.00855499	0.00906997	0.00537547	0.011114	0.0157117	0.0147305	0.0148836	0.00601132	0.00954054	0.0112102	0.0137204	0.0113871	0.0101632	0.00383537	0.00458183	0.00763025	0.00342449	0.0268481	0.0110935	0.00894347	0.00309838	0.00888409	0.00895562	0.00999983	0.0166505	0.00382908	0.00451162	0.00605979	0.00572296	0.00366604	0.00199759	0.00502995	0.00792869
ENSG00000240563	0.893867	1.04879	0.760299	1.28121	0.91399	1.35463	1.18963	0.893867	0.924495	1.32918	0.893867	0.957139	1.09074	0.893867	0.0032596	0.688414	0.932285	0.910074	0.893867	1.31522	1.72624	1.26788	1.23667	0.0763207	0.86212	0.893867	1.72753	1.19544	0.419309	0.905814	1.12318	0.439393	0.893867	1.4995	0.687206	1.07903	1.47366	0.868104	1.35105	1.48034	1.31209	1.07444	1.11969	0.193085	1.16758	0.972752	0.784374	0.756474	1.3863
ENSG00000132854	0.0471333	0.0539514	0.0504181	0.0251397	0.0593509	0.0493711	0.0250642	0.0624645	0.0581542	0.0616757	0.198437	0.0172062	0.0267152	0.0603262	0.0170027	0.0387977	0.0219311	0.0205213	0.017823	0.0242072	0.0272723	0.0147473	0.024303	0.041739	0.0482633	0.0885076	0.0738948	0.0486024	0.00719801	0.0359479	0.049896	0.0637259	0.0927438	0.243601	0.060948	0.074729	0.0247583	0.0461185	0.0243906	2.54197e-05	0.00903929	0.0686979	0.0368677	0.0374055	0.0640161	0.0677737	0.0403198	0.0599634	0.0675999
ENSG00000162607	0.0102379	0.00883896	0.0112341	0.00912639	2.54197e-05	0.0179895	0.0126408	0.00519024	0.00497422	0.00461074	2.54197e-05	0.000854586	0.00603592	0.00428792	0.00149683	0.0020632	0.01093	0.00602456	0.00563418	0.00756108	0.0147104	0.0175469	0.0181322	0.00327696	0.00439239	0.00219286	0.0151045	0.0103514	0.00560878	0.00790681	0.00673856	0.00872378	0.00559309	0.0330012	0.00292221	0.00554887	0.00511037	0.00281462	0.00911399	0.00647614	0.0142748	0.00429121	0.0302663	0.00976051	0.00225598	0.00482099	0.00124805	2.54197e-05	0.00374776
ENSG00000116641	0.0106846	0.0148064	0.0394833	0.0236674	0.0257802	0.0146925	0.019623	0.00880071	0.0135875	0.0312781	0.0129332	0.00628512	0.0152867	0.0170269	0.0109994	0.00670775	0.0126014	0.0198249	0.0111126	0.0168856	0.0177701	0.0258692	0.0147359	0.0133623	0.0238987	0.013474	0.0132148	0.00381157	0.00725631	0.0173331	0.0142298	0.0127896	0.0150237	0.030595	0.0136165	0.0118657	0.0177082	0.0112739	0.010307	0.0242344	0.0185334	0.0166079	0.00812361	0.0180504	0.0104572	0.0105784	0.00875257	0.00988274	0.0080337
ENSG00000125703	0.0131981	0.0162965	0.023832	0.012891	0.0135172	0.0148264	0.00675141	0.0124891	0.0136437	0.0113805	0.0276078	0.00877017	0.0152674	0.0091643	0.0119697	0.00480944	0.0115212	0.0197022	0.0155117	0.00768575	0.0113718	0.0112949	0.0107602	0.00852545	0.0133278	0.0105185	0.0116186	0.020184	0.0181044	0.0178038	0.0226119	0.012623	0.016454	0.0644962	0.00680264	0.0289344	0.00843523	0.0156064	0.00926985	0.0132098	0.00963364	0.0076655	0.0103304	0.0143941	0.00797063	0.0161367	0.00701446	0.012149	0.00752885
ENSG00000088035	0.00845245	0.00563699	0.0134581	0.0220265	0.0170885	0.0138476	0.0139724	0.0103099	0.00857937	0.0137867	0.007968	0.00937807	0.00312474	0.0048488	0.00552192	0.00346671	0.00844285	0.00465977	0.013219	0.00873536	0.00732289	0.0145654	0.012143	0.00337067	0.0104356	0.00610717	0.0176852	0.00459981	0.00514442	0.0142692	0.00482291	0.00813663	0.00582982	0.014891	0.00892544	0.0124435	0.0157273	0.013704	0.0202051	0.00683148	0.0142768	0.00378494	0.00724957	0.0144064	0.01162	0.0158797	0.0024007	0.00925269	0.00102618
ENSG00000142856	0.114821	0.170894	0.175309	0.123148	0.029681	0.0759642	0.109269	0.115638	0.104971	0.032705	0.0070696	0.134736	0.0551827	0.0500971	0.0112057	0.113611	0.0999238	0.109413	0.0812524	0.0812139	0.0895909	0.0491059	0.128709	0.0791583	0.1169	0.0428122	0.0656183	0.271621	0.0986534	0.0885731	0.0617863	0.0362493	0.118093	0.0465868	0.111697	0.126055	0.0968709	0.0194945	0.0616783	0.0496137	0.0651573	0.0242996	0.0913348	0.0793078	0.119502	0.114801	0.0618012	0.0982018	0.0690726
ENSG00000203965	0.0168736	0.0301756	0.0112064	0.00674105	0.0092368	0.0194678	0.0164984	0.00650603	0.0148861	0.0172771	0.00347132	0.0327352	0.0129215	0.00575848	0.00125605	0.00755707	0.0218737	0.0201132	0.00599493	0.00528709	0.00691031	0.0075905	0.0130918	0.00773769	0.011333	0.00590971	0.0313292	0.0217042	0.0150606	0.0139999	0.0167515	0.0250016	0.0159662	0.0514	0.0218216	0.0192442	0.00685322	0.00807277	0.00960834	0.00480591	0.0111664	0.005778	0.0084204	0.0193219	0.0159683	0.0118026	0.00864961	0.0186609	0.0074214
ENSG00000079739	0.0099115	0.00522712	0.000755667	0.00757906	0.00779893	0.0103212	0.00243104	0.0040892	0.00863239	0.0063078	0.00804192	0.00776431	0.00487001	0.00958678	0.00358214	0.00429138	0.00920842	0.00913133	0.00617401	0.00237998	0.00361465	0.00481255	0.0039674	0.00688508	0.0082096	0.00590745	0.00726138	0.0106859	0.0112931	0.00406228	0.00645617	0.0143179	0.00933097	0.0119561	0.00818901	0.00739037	0.00332272	0.00953707	0.00523198	0.0037289	0.00841301	0.00376137	0.00325424	0.0101998	0.00527711	0.00369285	0.00472288	0.0085509	0.00316917
ENSG00000185483	0.0163241	0.00776237	0.00363714	0.0749048	0.188475	0.0834285	0.0275404	0.0110788	0.00906741	0.00601055	0.0449355	0.0100952	0.011216	0.00946635	0.0216558	0.00479342	0.0097514	0.00916696	0.0154286	0.0372784	0.0502904	0.0857204	0.0323774	0.0101564	0.0206302	0.00708053	0.0122353	0.0316781	0.00744058	0.0119975	0.0169505	0.0140203	0.0399897	0.0515138	0.023429	0.00755633	0.121913	0.161226	0.123208	0.122752	0.0303383	0.0182013	0.0217918	0.00868701	0.0118124	0.0317316	0.0141787	0.00961845	0.00192718
ENSG00000223949	0.0381648	0.0162051	0.0244427	0.143755	0.234999	0.266991	0.0777714	0.0191526	0.0120395	0.0125873	0.0313045	0.0212509	0.0259792	0.0225666	0.0350468	0.0165914	0.0179856	0.0211934	0.0324846	0.0471516	0.269431	0.225242	0.0498933	0.0190282	0.0399832	0.00618631	0.0177018	0.0708085	0.0177978	0.0387074	0.0265557	0.0413852	0.0560163	0.0786037	0.0516858	0.0260245	0.226905	0.233487	0.23148	0.238287	0.0514518	0.0295026	0.0325695	0.016975	0.02407	0.0403759	0.0259665	0.0199146	0.0129709
ENSG00000158966	0.00772028	0.0175431	0.0103864	0.0225335	0.034895	0.0222837	0.0168809	0.0223216	0.0121335	0.0124604	0.0695645	0.00490011	0.00769997	0.0170616	0.0181304	0.00689765	0.0134052	0.00656533	0.00642462	0.0069138	0.0131236	0.0115178	0.0375994	0.0145738	0.0100246	0.0219728	0.0313679	0.0174419	0.00878584	0.00738585	0.0128079	0.00600597	0.00952733	0.0284611	0.00342998	0.0118867	0.00777944	0.0119278	0.000673198	0.00809785	0.0208673	0.0136183	0.0141521	0.00847651	0.00468716	0.00727565	0.00743536	0.00274361	0.00678047
ENSG00000162437	0.0238216	0.00910226	0.0069257	0.01347	0.00884049	0.0257661	0.0233777	0.00940422	0.00938803	0.0104512	0.0811799	0.00919193	0.0146746	0.00406794	0.00928858	0.0072365	0.0125348	0.00840955	0.0106508	0.0130907	0.0127302	0.0103656	0.0215276	0.0103779	0.00669406	0.0188613	0.0132602	0.0267243	0.0271087	0.0173601	0.0124544	0.029138	0.0164652	0.201394	0.0132269	0.0166915	0.0127256	0.00918524	0.0158247	0.0179509	0.021227	0.0115962	0.0161867	0.0161203	0.0170687	0.0115336	0.0099228	0.0147201	0.018027
ENSG00000162434	0.00731779	0.00423585	0.00431305	0.0090371	0.0191206	0.00691304	0.00761849	0.00450476	0.00441302	0.00525245	0.0113292	0.00750479	0.00619853	0.00719093	0.00526657	0.00483249	0.00481818	0.00434578	0.00845247	0.00327243	0.0100186	0.00572468	0.00563335	0.0059953	0.00543598	0.00257437	0.00373008	0.00833625	0.00750345	0.00782776	0.0075664	0.00833665	0.0115489	0.00477802	0.00491959	0.00344494	0.00753399	0.0225659	0.0096883	0.00480586	0.00568721	0.00674119	0.00529267	0.0108482	0.00434018	0.00411905	0.00681624	0.00612548	0.00641788
ENSG00000226891	0.0316793	0.0216612	0.00979148	0.016559	0.017719	0.0137604	0.0110515	0.0115122	0.0128985	0.0282361	0.106027	0.0187355	0.0256556	0.00969962	0.0476542	0.0049309	0.0320716	0.0220759	0.0174525	0.0116999	0.0131581	0.0133596	0.0228542	0.00987319	0.00137877	0.0383308	0.0368509	0.037014	0.0152978	0.0349754	0.0366162	0.00493107	0.0152307	0.0425708	0.0153004	0.0157221	0.0130512	0.00307596	0.0129952	0.0206908	0.0142014	0.0284829	0.0339829	0.0305161	0.0022478	0.00060578	0.0184993	0.000465812	0.00141032
ENSG00000162433	0.040164	0.0464238	0.0250924	0.0199277	0.0122325	0.0163828	0.00661319	0.0624724	0.0557556	0.0116726	0.206885	0.0291479	0.0751743	0.12668	0.0207236	0.0256255	0.0342858	0.0141162	0.0368139	0.00440039	0.0118997	0.00786548	0.00920714	0.049009	0.0395778	0.0546666	0.045326	0.0618243	0.0257431	0.0237986	0.0622658	0.0785626	0.0253407	0.10263	0.07152	0.0436853	0.005372	0.00763763	0.00414657	0.0104331	0.0110609	0.0319121	0.055439	0.0471242	0.0280261	0.0276214	0.0342401	0.0356506	0.0344272
ENSG00000116675	0.0277502	0.0239972	0.0217015	0.0050726	0.00150675	0.00225559	0.0031914	0.0319852	0.0283425	0.0068266	0.0441326	0.0288629	0.0267257	0.00750991	0.00797594	2.54197e-05	0.0240832	0.0142952	0.0377795	0.00473586	0.00396581	0.00166595	0.0053769	0.0154864	0.0169695	0.0224007	0.065314	0.0438292	0.00864764	0.0386007	0.0305259	0.0139817	0.0502072	0.0445125	0.00583022	0.0257681	0.00168188	0.0010829	0.00138661	0.00388201	0.00457757	0.0428514	0.0082227	0.0301687	0.0331713	0.00246985	0.0295705	0.0265195	0.0264643
ENSG00000213625	0.00167629	0.00171516	0.00143843	0.0159608	0.00395144	0.00488006	0.0132519	0.00217079	0.00193379	0.00158275	0.00349979	0.00294265	0.0026731	0.00212327	0.00153882	0.0016568	0.0014919	0.00133251	0.00190002	0.0157547	0.0159861	0.00736493	0.0117049	0.00174734	0.00209869	0.00181829	0.00166669	0.00138598	0.00161742	0.00182496	0.00256425	0.00377718	0.00163558	0.0259103	0.00166974	0.00161298	0.0114461	0.0039608	0.0139918	0.0172141	0.00546448	0.000964187	0.00169077	0.00179284	0.00106507	0.00232712	0.00172028	0.00241589	0.001344
ENSG00000116678	0.015886	0.0104643	0.00533445	0.012408	0.0175544	0.00709963	0.0163496	0.0112914	0.0110743	0.0093572	0.0391551	0.0448539	0.0120898	0.0108824	0.00925198	0.00748148	0.0104249	0.0120122	0.0112966	0.00660645	0.00419783	0.0113177	0.0199815	0.00460638	0.0087695	0.0258813	0.0102933	0.0125328	0.0069621	0.0138038	0.0172471	0.0581074	0.011361	0.0850601	0.0206939	0.010273	0.0105166	0.0149373	0.00387449	0.0132068	0.0123738	0.0102809	0.0171829	0.00476073	0.0188448	0.00463075	0.00826636	0.00673576	0.00733196
ENSG00000184588	0.00838445	0.00768449	2.54197e-05	0.00365705	0.00208422	0.00541724	0.00425335	0.016929	0.0162181	0.00300872	0.00957389	0.00838927	0.00719541	0.00376774	0.00846936	0.00482424	0.00763429	0.0125725	0.00390562	0.00106164	0.00506639	0.000700035	0.00682691	0.00688076	0.0122022	0.00810742	0.00888375	0.0089436	0.0169153	0.00579879	0.0141814	0.0060258	0.00621124	0.0115345	0.00796122	0.012634	0.00442859	0.00396826	0.00411768	0.00335073	0.00318898	0.0149064	0.00304079	0.00388161	0.00832625	0.00388916	0.00661465	0.000554008	0.013797
ENSG00000118473	0.012672	0.0090165	0.0072844	0.0043893	0.00605449	0.00698643	0.0110191	0.0140761	0.011875	0.00660661	0.162829	0.05091	0.0146904	0.0214107	0.00498002	0.00735164	0.0205229	0.0201014	0.0256519	0.00861876	0.00400645	0.00443189	0.00584159	0.0145094	0.013777	0.0846275	0.130786	0.0731553	0.0111431	0.0169398	0.0196964	0.0361255	0.0117775	0.0463929	0.00991323	0.0109032	0.00507977	0.00235203	0.00342287	0.00936156	0.00756266	0.0183902	0.00636237	0.00971971	0.0219555	0.0068575	0.0132851	0.018557	0.0117297
ENSG00000248458	0.0488371	0.014203	0.0756299	0.0636466	0.0691718	0.0610258	0.0649003	0.0808932	0.0914361	0.0150954	0.335392	0.236809	0.0829353	0.0928348	0.00872566	0.0303649	0.0496792	0.0262559	0.0648595	0.0591317	0.0535933	0.0616563	0.0613523	0.09025	0.0777429	0.0495217	0.119276	0.192328	0.0850596	0.0703482	0.0850907	0.232332	0.0235764	0.238294	0.174432	0.0475784	0.0653373	0.0604403	0.068029	0.0394918	0.00805896	0.0766537	0.0735606	0.0499212	0.0585635	0.0307897	0.0768115	0.0794403	2.54197e-05
ENSG00000152760	0.220996	0.395023	0.195056	0.0884703	0.14354	0.102495	0.070506	0.195469	0.186991	0.144134	2.68278	0.422781	0.278722	0.264905	0.390053	0.222227	0.196277	0.195969	0.201455	0.0870102	0.140859	0.0826729	0.0488202	0.191321	0.24082	0.32641	0.170893	0.0859063	0.199134	0.224435	0.215093	0.384797	0.217643	0.87348	0.282981	0.304135	0.0856357	0.145319	0.0770735	0.10088	0.0469947	0.207402	0.337521	0.309797	0.358325	0.170025	0.102983	0.267309	0.169917
ENSG00000152763	0.0383627	0.0241407	0.0235177	0.0100562	0.0207359	0.0342977	0.0448644	0.0314718	0.0108793	0.0282768	0.0385804	0.0303292	0.0310485	0.0398875	0.0142479	0.0214643	0.0215328	0.0135247	0.0297527	0.0187704	0.0127617	0.000735065	0.0259114	0.0171135	0.0258903	0.000144834	0.0302672	0.0344371	0.0226518	0.00994026	0.0370157	0.0403549	0.0138772	0.0665298	0.0187438	0.0290293	0.0122322	0.0369275	0.0120222	0.000186014	0.0556936	0.0395306	0.00620966	0.0136741	0.00899085	0.00596954	0.00573633	0.0242725	0.00123422
ENSG00000198160	0.116365	0.0843804	0.161786	0.0283529	0.070135	0.0415335	0.0797803	0.101609	0.153532	0.0770338	0.295536	0.0470108	0.0708582	0.159265	0.126949	0.0612949	0.0766494	0.235407	0.0991975	0.0640204	0.0470847	0.0333952	0.0684106	0.148833	0.14708	0.0796305	0.0865878	0.0930191	0.0867433	0.135116	0.0802293	0.060026	0.0819985	0.120532	0.137813	0.165661	0.0637508	0.0723562	0.045238	0.0355845	0.0555868	0.130268	0.0393462	0.0933359	0.0639889	0.0932565	0.06033	0.0892402	0.105593
ENSG00000116704	0.0134685	0.00996264	0.00517708	0.0321535	0.0163926	0.0740597	0.0687004	0.00608618	0.00731948	0.00591837	0.00737954	0.0122015	0.00884914	0.00228813	0.00125417	0.00857044	0.00422126	0.00791544	0.0225864	0.0197124	0.020602	0.0283463	0.0464593	0.00791128	0.0202823	0.0012614	0.0236312	0.00290414	0.00607651	0.00984519	0.00784831	0.0203541	0.0115154	0.103732	0.00623526	0.0137656	0.0514565	0.0146924	0.0331282	0.0193675	0.0656885	0.00981197	0.00567513	0.010445	0.00742257	0.0103669	0.0115735	0.0173596	0.00904412
ENSG00000081985	0.0513112	0.0597643	0.100028	0.0418566	0.213411	0.0283471	0.0547477	0.164203	0.116713	0.109608	0.0871226	0.0349418	0.0351284	0.0640129	0.0145624	0.0414988	0.0369605	0.0760367	0.0777336	0.0555107	0.00829787	0.0619004	0.0544503	0.0812339	0.0891311	0.070276	0.109079	0.0422563	0.0895184	0.100646	0.0650657	0.0429823	0.0968904	0.0944819	0.0893538	0.11473	0.0164329	0.120381	0.0185745	0.0696158	0.0830981	0.0464224	0.0832696	0.0594547	0.112483	0.114327	0.0755491	0.0923983	0.103783
ENSG00000142864	0.00593667	0.00609069	0.000551516	0.00726708	0.00415546	2.54197e-05	0.00631892	0.00665888	0.00664471	0.00401928	0.000887048	0.00499659	0.00441878	0.00260377	0.00332546	0.0042204	0.00545311	0.00437972	0.0052991	0.00645057	0.0050102	0.00750721	0.00108437	0.0017801	0.0064074	0.00434059	0.00827405	0.016442	0.0108748	0.0055698	0.00949426	0.00870454	0.00450619	0.00941619	0.00110685	0.00389336	0.008787	0.00175838	0.00812338	0.00161399	0.0165504	0.00297527	0.00544412	0.0051322	0.00126214	0.00657447	0.00127144	0.0040879	0.00380119
ENSG00000116717	0.0226521	0.0170087	0.0205256	2.54197e-05	0.00741773	0.0151876	0.0226856	0.0440536	0.0138486	0.0280838	0.030925	0.0314801	0.0213798	0.00947695	0.0225693	0.0159328	0.0150593	0.0114582	0.0213574	0.00388861	0.00490935	2.54197e-05	0.0043657	0.0201152	0.0196107	0.00927767	0.0105643	0.0115829	0.0244089	0.0302464	0.0155392	0.005259	0.00965177	0.0206794	2.54197e-05	0.0154531	2.54197e-05	0.00744286	0.00471817	2.54197e-05	0.00449508	0.0135005	2.54197e-05	0.0194936	0.0480019	0.0132517	0.0517838	0.0121235	0.041618
ENSG00000172380	0.00344678	0.00351972	0.00566321	0.00961632	0.0245695	0.0150373	0.00808461	0.00629571	0.00595258	0.00651714	0.0317152	0.006083	0.00308425	0.00363448	0.0056793	0.00394463	0.00352735	0.00403193	0.00263159	0.0107043	0.0045824	0.0549103	0.0164718	0.00297303	0.00517929	0.00613892	0.0164672	0.00762658	0.00527356	0.00433651	0.00319684	0.00697194	0.00273979	0.209859	0.00191299	0.00428346	0.0116891	0.00603775	0.00706831	0.0243094	0.0119413	0.00626907	0.00216146	0.00511066	0.00433683	0.00663081	0.00405273	0.00447053	0.00308362
ENSG00000232284	0.00548878	0.00538884	0.00474462	0.0246891	0.00739621	0.00774394	0.0235436	0.00488718	0.00683502	0.0110627	0.0968724	0.0238926	0.00298213	0.00357984	0.0194799	0.00795842	0.00703984	0.00431426	0.00695596	0.0183329	0.00442184	0.0395545	0.00478768	0.00837607	0.00808371	0.00559737	0.0245687	0.0261879	0.00526515	0.00506598	0.00363424	0.00518861	0.0122712	0.127119	0.0293743	0.00508602	0.00394695	0.00175932	0.00513802	0.148666	0.0136729	0.00566498	0.00430168	0.00506581	0.0414327	0.170492	0.00375967	0.00432567	0.00527484
ENSG00000116729	0.00600278	0.00424104	0.00457288	0.00309709	0.00594382	0.00397093	0.00237331	0.00512748	0.00697406	0.00513014	0.0457024	0.00248254	0.00258053	0.00328996	0.0222627	0.00407744	0.00560493	0.00398654	0.00482245	0.00229636	0.00298629	0.00633617	0.00377541	0.00910721	0.00765414	0.00826338	0.00368003	0.0110567	0.00440695	0.00447714	0.00318973	0.0053562	0.00834113	0.126338	0.00450806	0.00468527	0.00224577	0.00120365	0.00352209	0.00202466	0.00580958	0.00555221	0.00287121	0.00396352	0.00543157	0.00709087	0.00212313	0.00364866	0.00410989
ENSG00000033122	0.0136147	0.0132861	0.0222237	0.00783425	0.00862393	0.010711	0.00619167	0.044506	0.0130779	0.0533714	0.00604831	0.0516422	0.0138955	0.0125335	0.0252809	0.00223173	0.00819011	0.0116463	0.0202748	0.00357315	0.00342664	0.00281778	0.0089121	0.0227866	0.0202548	0.0123241	0.0281984	0.00641011	0.0202914	0.050454	0.0335915	0.0201258	0.0426862	0.0228736	0.0189228	0.020208	0.00446886	0.0172355	0.00622341	0.00457655	0.0200451	0.0259803	0.050844	0.0119546	0.00948921	0.0229955	0.0039402	0.0351289	0.00229626
ENSG00000066557	0.0110751	0.0196391	0.0149759	0.00497785	0.00102995	0.0078085	0.0196235	0.0235797	0.0087816	2.54197e-05	0.00233301	0.0281681	0.0103446	0.00344179	0.0200855	0.0107185	0.00595573	0.017582	0.0202109	0.00557014	0.0080652	0.0116062	0.0071992	0.00596513	0.0165294	2.54197e-05	2.54197e-05	0.0109776	0.0135654	0.0186519	0.0349918	0.0225351	0.0086581	0.0273898	0.0195836	0.018769	0.00212245	0.0151848	0.0193499	0.0109141	0.0248808	0.00789974	0.0449824	0.0232704	0.0091897	0.0158064	0.00663983	0.0209904	0.000287582
ENSG00000116754	0.00386968	0.00678772	0.00680116	0.0310972	0.0211886	0.0225312	0.0216593	0.00527642	0.00607394	0.00654608	0.00608984	0.00210266	0.00341686	0.00682377	0.00373072	0.00679966	0.00918828	0.00979496	0.00591517	0.0220024	0.0144205	0.0335308	0.0408969	0.00511178	0.0124358	0.002147	0.00782424	0.0050142	0.00718974	0.0120191	0.00855094	0.0089631	0.00634038	0.038294	0.00732115	0.0066793	0.038987	0.0124788	0.0147799	0.0294025	0.0186631	0.00565434	0.0127043	0.00905762	0.00368499	0.00885024	0.00489845	0.00281164	0.00458741
ENSG00000118454	0.0183248	0.0168359	0.0163242	0.0265267	0.0429567	0.0286317	0.0141479	0.0205074	0.011127	0.0116979	0.00518816	0.00514444	0.0189665	0.0108277	0.0140196	0.0280722	0.0158339	0.0178473	0.0234774	0.0122351	0.0408559	0.0276957	0.0322884	0.00839793	0.0162477	0.00252878	0.0209773	0.0256283	0.0172708	0.03074	0.0236057	0.0107548	0.0202289	0.0319193	0.0239467	0.00925094	0.0159037	0.0370454	0.0317418	0.0165025	0.0512189	0.0225908	0.0273037	0.0189622	0.0146978	0.051767	0.00699025	0.0232082	0.00170324
ENSG00000197568	0.181256	0.151016	0.126305	0.190182	0.0406129	0.15447	0.190714	0.0878124	0.127318	0.127493	0.16029	0.135067	0.226232	0.158426	0.0275524	0.140651	0.167746	0.144697	0.164771	0.082414	0.188009	0.194437	0.374283	0.135101	0.184304	0.0705795	0.078132	0.0799969	0.0796316	0.0793681	0.161272	0.0882466	0.0655313	0.242694	0.0990415	0.332095	0.212831	0.0775033	0.164995	0.163853	0.0387764	0.131419	0.137699	0.206433	0.0636827	0.0301105	0.130983	0.171117	0.0659998
ENSG00000116761	0.0279113	0.0149247	0.0212853	0.00711779	0.04325	0.0213471	0.0318101	0.0254629	0.0341452	0.0158751	0.0388412	0.0141526	0.030988	0.00859082	0.0155374	0.0191682	0.0102647	0.024668	0.0157179	0.0132307	0.00638247	0.0272384	0.0367988	0.00848766	0.0297249	0.0288689	0.0257015	0.0022489	0.00794992	0.00882145	0.0496089	0.0215541	0.0103855	0.0325161	0.00423508	0.00506504	0.011138	0.00616698	0.0174272	0.00539486	0.0831618	0.035202	0.0108473	0.0196349	0.00386095	0.0144787	0.0185778	0.0057224	0.00238124
ENSG00000050628	0.0102401	0.00466295	0.0181277	0.0142198	0.162105	0.108997	0.168255	0.00624323	0.0148032	0.0156662	0.108424	0.0419484	0.028614	0.0104851	0.0325544	0.00926803	0.00772008	0.0121666	0.010496	0.184288	0.118929	0.0142072	0.116212	0.00644978	0.0154654	0.0243924	0.0259409	0.0504934	0.02383	0.0626684	0.0375879	0.0538343	0.0603263	0.0790354	0.0235796	0.00574169	0.099055	0.163114	0.233959	0.155209	0.104678	0.026335	0.0126085	0.0618031	0.037689	0.0462544	0.0169893	0.00712723	0.00265653
ENSG00000235782	0.0651195	0.443323	0.296778	0.378564	0.393608	0.411753	0.343806	0.33683	0.435537	0.419308	0.638384	0.460518	0.170773	0.362289	0.144188	0.408465	0.0893143	0.15198	0.0906081	0.364245	0.406254	0.35341	0.348649	0.399063	0.445448	0.427073	0.442898	0.383049	0.472477	0.495801	0.149359	0.406587	0.495184	0.46402	0.117481	0.447267	0.350912	0.402315	0.359469	0.374209	0.358639	0.388095	0.0862412	0.438787	0.391521	0.366588	0.3377	0.163419	0.108068
ENSG00000269933	0.0690872	0.0547971	0.0514168	0.0414853	0.139524	0.0715512	0.168001	0.0530606	0.0697941	0.126956	0.566292	0.076164	0.0654145	0.0758581	0.291709	0.0623086	0.0223794	0.0602667	0.0322412	0.190239	0.0545962	0.00662595	0.082557	0.0593916	0.0685214	0.338372	0.344724	0.226054	0.150356	0.0855794	0.0645355	0.282136	0.146166	0.403607	0.0737528	0.0661869	0.0553806	0.243984	0.0566314	0.227208	0.0841594	0.0861083	0.0262767	0.134986	0.0662636	0.112883	0.0612683	0.0267397	0.00291681
ENSG00000132485	0.0063138	0.00543554	0.0163012	0.00786852	0.00871403	0.00662227	0.00743608	0.00581671	0.00530539	0.00667069	0.00645513	0.0083784	0.00590017	0.00638975	0.00620758	0.00478599	0.00815839	0.00540697	0.00714684	0.0124407	0.00885871	0.00639605	0.0115876	0.00613511	0.00541258	0.00423667	0.008999	0.00892112	0.00746598	0.0103893	0.00625466	0.00762109	0.00741569	0.028537	0.00702855	0.00562815	0.0084396	0.00461514	0.0108148	0.00967781	0.00512502	0.00888448	0.0128064	0.00631154	0.00493201	0.00797001	0.00367575	0.00449648	0.00528056
ENSG00000229956	0.00734835	0.0298392	0.0146545	0.014576	0.00969099	0.0675257	0.0255925	0.016511	0.00840225	0.0119467	0.0135336	0.024912	0.0888108	0.0140381	0.00834996	0.0388861	0.0283645	0.0257755	0.0433624	0.0450999	0.0181646	0.0190693	0.0270285	0.0101599	0.00565421	0.0133624	0.0265719	0.0316981	0.0198685	0.0569123	0.0528013	0.0288935	0.0174367	0.0822454	0.0217903	0.0166017	0.00822569	0.0219204	0.00476222	0.00377416	0.0231951	0.0504516	0.0348069	0.0168281	0.0139599	0.0205624	0.0369014	0.0289462	2.54197e-05
ENSG00000172260	0.0124702	0.0241365	2.54197e-05	0.0128769	0.0102554	0.0231427	0.0238914	0.0173392	0.00751832	0.00837589	0.122098	0.0340852	0.0117875	0.0156056	0.0109746	0.0145455	0.0139361	0.0222102	0.0295124	0.0266342	0.0124148	0.0107815	0.0215513	0.0201761	0.01031	0.00835293	0.0274352	0.0582315	0.00837432	0.0437886	0.0285473	0.0598324	0.0299666	0.0855613	0.0287537	0.0225309	0.015913	0.00462984	0.01082	0.00955086	0.0236094	0.0335195	0.0368105	0.0263291	0.000906484	0.020882	0.0334573	0.0119952	0.0195224
ENSG00000254685	0.0213401	0.0264247	0.00813426	0.0320044	0.0507498	0.0308882	0.0339039	0.0261231	0.0327008	0.0249632	0.0212304	0.0229391	0.0266092	0.0278133	0.0126048	0.0215212	0.0290381	0.0269896	0.0266839	0.0270208	0.035099	0.0249884	0.0227155	0.0241799	0.0349194	0.0183898	0.0230157	0.0224119	0.0197741	0.0324375	0.027059	0.0221607	0.0258279	0.0723427	0.0206688	0.0332763	0.036368	0.0506114	0.0316417	0.0273009	0.0298503	0.0186687	0.0167365	0.0376328	0.0308662	0.0238687	0.0276967	0.0255378	0.0362407
ENSG00000116783	0.0571359	0.0719853	0.0496693	0.0420688	0.016195	0.0398114	0.043205	0.0418395	0.0536585	0.013767	0.14542	0.067632	0.0541455	0.0328651	0.0287032	0.0600109	0.132487	0.0777899	0.0445152	0.0414547	0.0359299	0.0409361	0.090334	0.0392475	0.0649861	0.107851	0.00668939	0.104899	0.0285908	0.0880568	0.0677573	0.12765	0.0498632	0.191966	0.0702551	0.0531133	0.0389717	0.0230017	0.0417997	0.0266163	0.0571851	0.070061	0.0813022	0.060544	0.0334753	0.0425039	0.0485372	0.0502803	0.0339032
ENSG00000237324	0.0684652	0.0670711	0.0652492	0.090251	0.0367773	0.0760149	0.0839787	0.060312	0.0312006	0.0497386	0.32709	0.115839	0.0608247	0.0716811	0.010339	0.064364	0.0940159	0.129619	0.0687093	0.0801889	0.0753301	0.0761266	0.0950075	0.0659415	0.0533781	0.234831	0.0414684	0.216476	0.0557792	0.0652722	0.0883362	0.0734075	0.0512518	0.276407	0.0684712	0.0637734	0.0844464	0.0322908	0.0764066	0.0755329	0.082441	0.102094	0.0870537	0.0782936	0.0552547	0.0547564	0.0789281	0.0731294	0.0562875
ENSG00000116791	0.0964247	0.0674418	0.0582468	0.0978816	0.0818061	0.0828781	0.0867069	0.0397149	0.0393527	0.0747266	0.0590147	0.0192119	0.109105	0.030051	0.0452114	0.0550448	0.0842602	0.0676297	0.0749311	0.0867161	0.0843346	0.0760856	0.0866885	0.0471039	0.040219	0.151449	0.0810001	0.0333586	0.073996	0.0443626	0.141454	0.0652981	0.0404069	0.162517	0.0935835	0.0767878	0.104942	0.0985975	0.0897196	0.101902	0.085297	0.0831481	0.0215383	0.0836266	0.0600825	0.0762092	0.0661633	0.0229517	0.0394185
ENSG00000162623	0.00783548	0.00656596	0.00773788	0.024791	0.011812	0.0165913	0.0116701	0.0067133	0.00582873	0.0135555	0.00488248	0.0100717	0.00853095	0.00281465	2.54197e-05	0.00197368	0.00791608	0.00652353	0.00561393	0.0125075	0.0125351	0.0121389	0.0121825	0.00767522	0.00587356	0.00633635	0.015331	0.00706582	0.00511488	0.00630439	0.00769134	0.00576585	0.00721869	0.0548019	0.00483705	0.0053876	0.0134586	0.0189572	0.0121687	0.012974	0.00717942	0.00502837	0.00388839	0.00617964	0.00321056	0.00698658	0.00565728	0.00753594	0.00464575
ENSG00000117054	0.00600713	0.00782197	0.0045939	0.00319088	0.0276124	0.00541447	0.00725892	0.00655715	0.00742497	0.0179704	0.00311612	0.00407108	0.0137287	0.00322054	0.00359	0.00590472	0.00450022	0.00526661	0.00515505	0.00221819	0.0062265	0.0017775	0.00263021	0.00956076	0.0082146	0.00297193	0.0176402	0.01066	0.00578166	0.00684951	0.0207697	0.0048393	0.00543934	0.0303379	0.00832447	0.00483436	0.00613231	0.0339778	0.00501172	0.00492257	0.00465415	0.00731476	0.0170334	0.00527979	0.00370207	0.00412112	0.00677502	0.0165923	0.0099876
ENSG00000137955	0.00660689	0.00849713	0.00515856	0.0172664	0.0128444	0.000360079	0.018107	0.00482566	0.00634141	0.0058648	0.00383117	0.00205669	0.00524939	0.00410827	0.00377364	0.00443719	0.00490847	0.00657667	0.00494163	0.00257472	0.00931689	0.00402068	0.0151049	0.00525117	0.00972213	0.00313428	0.00999146	0.000795199	0.00663971	0.00925236	0.0100603	0.00690904	0.00542902	0.0253534	0.00236283	0.00740059	0.0166782	0.0137406	0.00556848	0.00740951	0.0106013	0.00576837	0.0109304	0.00430138	0.00228425	0.00316653	0.00288664	0.0071964	0.00471295
ENSG00000057468	0.192186	0.132135	0.200072	0.0896033	0.0319484	0.0863641	0.0900496	0.17992	0.193142	0.194428	0.149144	0.23481	0.221568	0.144919	0.0156699	0.125059	0.197114	0.167322	0.194128	0.0733579	0.100959	0.0687048	0.0852848	0.187948	0.188346	0.218855	0.179673	0.25712	0.136654	0.192022	0.277475	0.204202	0.204468	0.381975	0.231476	0.136848	0.0750439	0.0422659	0.0833756	0.068481	0.0741657	0.204661	0.224945	0.145511	0.0803649	0.247784	0.187953	0.138478	0.0837595
ENSG00000184005	0.00419464	0.00997502	0.0186832	0.0161067	0.003503	0.0152901	0.0127883	0.007441	0.00394717	0.00383186	0.0450726	0.0511767	0.011468	0.00566143	0.00591412	0.00411364	0.00326342	0.00369841	0.00389603	0.0101459	0.00728736	0.00435486	0.00970826	0.0272116	0.00908917	0.0129835	0.00360203	0.018345	0.00720748	0.0132849	0.01868	0.0024865	0.00840542	0.0150392	0.00181301	0.010335	0.00491857	0.00847202	0.00383499	0.00517452	0.00536044	0.0128661	0.0109983	0.00427602	0.0147599	0.00440528	0.0124209	0.00823831	0.000814115
ENSG00000142892	0.00901627	0.00873473	0.0201583	0.00883531	0.000635119	0.00921691	0.0127007	0.0128277	0.00712237	0.0118199	0.000863752	0.0158147	0.01222	0.0102073	0.00316959	0.014973	0.00835638	0.0079431	0.0112645	0.005606	0.00561565	0.00693957	0.00684291	0.00818118	0.0089443	0.00152944	0.00636331	0.00327641	0.00636609	0.0262777	0.0214901	0.00523311	0.00906075	0.0228343	0.00374746	0.00857645	0.0140187	0.005049	0.00513741	0.00714397	0.00251415	0.00678934	0.00484639	0.0097901	0.0107669	0.0134809	0.0114092	0.00372701	0.00751245
ENSG00000154027	0.0755137	0.0426795	0.0306204	0.0152251	0.0252822	0.0170872	0.0275345	0.0205808	0.0351983	0.0493965	0.155771	0.0703313	0.051708	0.021717	0.00769564	0.046148	0.0575569	0.0172373	0.0213504	0.0250696	0.014437	0.0106221	0.0152292	0.0441987	0.0250015	0.0140713	0.0655374	0.0606108	0.0124383	0.0731917	0.0459318	0.0700222	0.0814735	0.266687	0.054603	0.0351186	0.014815	0.0175045	0.0140905	0.0163945	0.0142658	0.0630929	0.0464476	0.0805815	0.0498871	0.0207164	0.0125443	0.0139912	0.0367056
ENSG00000036549	0.0128606	0.0101988	0.00902808	0.0446208	0.0115039	0.0367473	0.0177384	0.011217	0.00809614	0.0163055	0.00991116	0.0135418	0.00767909	0.0042865	0.000135634	0.00835858	0.011242	0.013708	0.0112387	0.0240699	0.0203472	0.0273763	0.0259838	0.00911707	0.00231536	0.000682727	0.0225199	0.0108171	0.00990193	0.00894984	0.0109496	0.0121409	0.00449257	0.0642176	0.00339267	0.0076695	0.0455113	0.00381021	0.0159565	0.0260965	0.0306802	0.00803311	0.000481134	0.00781277	0.0157796	0.0098381	0.00367784	0.0107217	0.00204582
ENSG00000077254	0.00794186	0.0109911	0.013861	0.0153664	0.00425913	0.0222989	0.0105136	0.00880016	0.0102439	0.00531918	0.00357532	0.0150859	0.0065244	0.00515753	0.00371276	0.00312245	0.0104108	0.00628082	0.0053608	0.00488114	0.00575683	0.00611842	0.0234412	0.00524759	0.00909163	0.00761345	0.00587729	0.0187474	0.00743008	0.00351506	0.00867289	0.00409102	0.00474791	0.0336781	0.00946633	0.00804234	0.00677396	0.00403214	0.0101885	0.000872559	0.0107387	0.00739122	2.54197e-05	0.00964464	0.0101297	0.0049059	0.00161615	0.00462028	0.00375188
ENSG00000180488	0.0298878	0.0261544	0.0318451	0.0118888	0.00634109	0.0773562	0.038597	0.0609394	0.0199376	0.0240515	0.00427531	0.0275293	0.0371619	0.0247429	0.00791464	0.0167414	0.0329201	0.00938363	0.0530016	0.00297427	0.0103461	0.00765082	0.017331	0.0161177	0.0117056	0.021437	0.0759942	0.0470079	0.0273471	0.050738	0.0575609	0.0127074	0.0282301	0.0648992	0.0188469	0.043294	0.0150251	0.0273037	0.00776938	0.0228855	0.00459537	0.0106336	0.0474742	0.0334791	0.00733451	0.0293544	0.0230373	0.0201883	0.0298748
ENSG00000162614	0.0233427	0.0103991	0.00252288	0.046708	0.0517007	0.0516508	0.0396236	0.0136585	0.0200488	0.0115667	0.0470048	0.0146925	0.0150697	0.0190014	0.00627481	0.0128826	0.0139357	0.0150975	0.0164456	0.0414159	0.0583451	0.0451196	0.0441322	0.0173621	0.0158279	0.0105952	0.0239862	0.0294724	0.0219994	0.0258369	0.0357066	0.0611142	0.0183106	0.0643924	0.0181211	0.00959081	0.0502404	0.0496127	0.0498766	0.0473192	0.0431585	0.0278652	0.02549	0.0163142	2.54197e-05	0.0497277	0.0170143	0.011871	0.0219833
ENSG00000162613	0.00778091	0.0104179	0.00888077	0.012962	0.00547439	0.00742931	0.0154947	0.00325931	0.00528013	0.0069159	0.00414559	0.00425373	0.00429619	0.0055842	0.0049728	0.00326435	0.00636664	0.00301049	0.00731418	0.0243105	0.0179488	0.0175728	0.0204336	0.00342862	0.00572893	0.0060721	0.00916534	0.0145293	0.00790787	0.0108313	0.0160932	0.00566451	0.00551961	0.0206352	0.00231687	0.00768864	0.0190026	0.00886858	0.0149913	0.00713819	0.0102509	0.00877333	0.0107461	0.0064794	0.00219875	0.00515142	0.00441258	0.00494451	0.0108192
ENSG00000162616	0.0125424	0.00900048	0.0148354	0.0171712	0.0114521	0.00781495	0.0176602	0.00575455	0.00791357	0.00910177	0.024812	0.0149745	0.0053464	0.000159655	0.00200564	0.0126285	0.00699546	0.0110753	0.0105512	0.00954701	0.0138298	0.00769506	0.0125656	0.00597032	0.00744836	0.00847542	0.00780218	0.0115772	0.00992412	0.0062684	0.0228936	0.0075519	0.0109426	0.0509177	0.0055056	0.00862301	0.027842	0.0158841	0.0108264	0.0125695	0.0133197	0.0127161	0.0242662	0.0126917	0.00359952	0.00721122	0.015279	0.0111494	0.00845531
ENSG00000137960	0.031115	0.0393217	0.00974085	0.0831852	0.0879532	0.0940232	0.0868774	0.0316611	0.074707	0.034678	0.173913	0.0233726	0.061082	0.0345721	0.0154146	0.0451161	0.0333318	0.0466882	0.0381594	0.0803896	0.0922597	0.0831402	0.0935991	0.0291609	0.0702253	0.031492	0.048046	0.0587133	0.0453654	0.0518521	0.056423	0.044845	0.0369068	0.164904	0.0397358	0.0653751	0.0823743	0.0810722	0.080602	0.0738386	0.0871638	0.0512139	0.0453745	0.0433416	0.0556693	0.0424981	0.0349796	0.0403915	0.0265177
ENSG00000273338	0.0305082	0.015783	0.0117238	0.0174891	0.0265735	0.0175443	0.0192111	0.025732	0.000326696	0.0257594	0.0213123	0.0290962	0.0118519	0.0131228	0.0233922	2.54197e-05	0.00720714	0.0167795	0.02106	0.0267335	0.0312101	0.01666	0.017433	0.0162344	0.0224937	0.0198151	0.0285737	0.0319333	0.00888387	0.0299456	0.00407508	0.0217294	0.0448565	0.187982	0.0297056	0.0123986	0.0255712	0.0277975	0.0188481	0.0317017	0.0140755	0.00908421	0.0258233	0.00555615	2.54197e-05	0.0201937	0.00147779	0.0189679	0.0150534
ENSG00000237413	0.120674	0.333814	0.111296	0.286285	0.264631	0.310984	0.259213	0.151344	0.145627	0.163018	0.387181	0.0327116	0.136407	0.0916876	0.109408	0.140503	0.110171	0.118071	0.10599	0.275949	0.306567	0.268361	0.264718	0.116818	0.129098	0.0850872	0.33061	0.0739918	0.0724148	0.166274	0.128636	0.0513651	0.143404	0.344825	0.110339	0.117425	0.267777	0.290699	0.274051	0.284487	0.269009	0.138186	0.0993602	0.0372439	0.131735	0.139917	0.101036	0.123254	0.288484
ENSG00000122420	0.0283058	0.0327788	0.00853035	0.0737209	0.129765	0.0276499	0.0702695	0.0495255	0.099238	0.02436	0.294805	0.0291934	0.0277719	0.0147895	0.0270416	0.0276266	0.0293785	0.0305801	0.0197556	0.0840867	0.0910002	0.00753782	0.0921477	0.0249353	0.0414935	0.0340275	0.0326709	0.0768861	0.0354563	0.0484195	0.023007	0.0566567	0.0511649	0.0812256	0.122427	0.0330934	0.0596709	0.154768	0.0715604	0.0813777	0.0889549	0.0343025	0.029759	0.0255504	0.0465491	0.0495195	0.0215303	0.0199913	0.00858027
ENSG00000137959	0.0102366	0.0113759	2.54197e-05	0.0226427	0.0326435	0.0333655	0.00630264	0.00811982	0.00960708	0.0145018	0.014593	0.0307657	0.0344404	0.00670972	0.0127541	0.00660584	0.010414	0.0154476	0.0187781	0.0228662	0.00887084	0.0387914	0.0236313	0.00825553	0.00776578	0.0273832	0.00707927	0.0341272	0.00930174	0.0221953	0.0247944	0.00524498	0.0113656	0.0186324	0.00940101	0.0109254	0.0203616	0.0130843	0.0185837	0.0257416	0.0254426	0.0260375	0.00216075	0.0122829	0.00716571	0.0100638	0.00576392	0.00575061	0.00752929
ENSG00000137965	0.0266832	0.0432767	0.0232251	0.0363458	0.0386483	0.0489924	0.0452788	0.0372998	0.0362131	0.0386876	0.0280448	0.0343559	0.0498761	0.0358518	0.0479711	0.0541516	0.0395296	0.0498893	0.029198	0.0496785	0.0295831	0.0555066	0.0463502	0.0396088	0.0472582	0.0282681	0.0379625	0.0275792	0.031324	0.0528673	0.044223	0.0309189	0.0583689	0.0504806	0.043304	0.0477014	0.0408665	0.0422406	0.0377283	0.0539649	0.0320652	0.0506421	0.0496846	0.0287483	0.0558605	0.0693998	0.0587872	0.0425989	0.0612898
ENSG00000162618	0.00638974	0.0097324	2.54197e-05	0.0188394	0.0118729	0.0176696	0.0128509	0.00736583	0.00699126	0.00516318	0.0887593	0.0117205	0.0154236	0.00648027	2.54197e-05	0.00932882	0.00546772	0.00489018	0.00747497	0.00161361	0.0142945	0.0103413	0.00244999	0.0106911	0.0101095	0.0258953	0.00292863	0.0187421	0.0112853	0.00705326	0.0133291	0.00376037	0.00487099	0.043282	0.00363242	0.00934255	0.0228555	0.0259329	0.0195708	0.00254342	0.0102785	0.0069751	2.54197e-05	0.00905481	0.0112432	0.00990266	2.54197e-05	2.54197e-05	0.0117835
ENSG00000117114	0.00529098	0.00558113	0.0058131	0.0221537	0.0907119	0.0234472	0.00730464	0.00299407	0.00529545	0.00616841	0.0613151	0.0385296	0.00590169	0.00437799	0.0184623	0.00496305	0.00852662	0.00602899	0.00771999	0.0205297	0.00835988	0.00989231	0.0276549	0.0146727	0.00660282	0.0156168	0.00601329	0.00683503	0.00936841	0.00275784	0.0112708	0.00429315	0.00323292	0.0330247	0.00735164	0.012267	0.0140524	0.0660458	0.00947137	0.0109124	0.0135438	0.00469066	0.00542162	0.00400166	0.00922804	0.0117505	0.00435997	0.00393506	0.0134446
ENSG00000137941	0.0106516	0.00423416	0.0166586	0.00309913	0.00298011	0.00398152	0.00255061	0.0115619	0.0052156	0.0228561	0.069351	0.00606388	0.0157498	0.00901198	0.0102373	0.00882227	0.0146222	0.00243501	0.0220489	0.00477893	0.00273236	0.00177311	0.00779846	0.00344924	0.00670667	0.023395	0.0533376	0.0555252	0.00938563	0.0118433	0.0285357	0.0563346	0.0291533	0.0536311	0.035637	0.00269997	0.00402225	0.00381044	0.001923	0.0058743	0.00397589	0.0152517	0.0457201	0.00761796	0.0182739	0.00582353	0.00900877	0.00712196	0.0135082
ENSG00000271576	0.0274281	0.00862871	0.0156258	0.0218857	0.00166057	0.0399098	0.018604	0.0211701	0.0194044	0.0335825	0.0151369	0.0276026	0.0478802	0.0190183	0.00284736	0.0205974	0.0366114	0.0316776	0.0318315	0.0184183	0.0137863	0.013845	0.0223069	0.0103334	0.0161386	0.00687823	0.0381251	0.0210788	0.0230091	0.0223756	0.0464131	0.0217812	0.0194242	0.0600797	0.0233453	0.0442824	0.0143854	0.0173486	0.0142533	0.000666359	0.0216012	0.0255113	0.0264119	0.0386369	0.00720636	0.00429317	0.024067	0.0160651	0.0146047
ENSG00000142875	0.0162945	0.0102574	0.0129784	0.00504896	0.00160422	0.00984194	0.00127322	0.00697148	0.00452041	0.00834608	0.0133075	0.0115206	0.0288108	0.0081382	0.00709015	0.0128218	0.0150298	0.0069968	0.0117303	0.00584162	0.00313389	0.0066421	0.00555383	0.00389362	0.00469754	0.00379685	0.000520925	0.0144355	0.0094465	0.0128346	0.0389488	0.0100352	0.00976466	0.0335208	0.00202712	0.00771515	0.00223747	0.00250045	0.00348459	0.00223064	0.00317815	2.54197e-05	0.00655263	0.00969772	0.00859837	0.00639088	0.00341557	0.00675824	0.00406141
ENSG00000137976	0.0397901	0.702886	1.4608	0.602048	0.598726	0.594059	0.579348	1.79284	2.37124	0.930078	3.77399	0.897875	1.06365	0.615404	0.405122	2.26238	0.819102	0.773686	0.69214	0.539675	0.567899	0.582602	0.61162	0.585066	2.51222	2.21049	1.04788	1.94618	1.0182	0.893867	0.872616	0.470006	0.603256	2.12531	0.591907	0.858825	0.686691	0.622003	0.610057	0.487767	0.51879	1.90748	0.845488	0.0512928	2.02431	0.637156	0.577911	0.512017	2.07297
ENSG00000117133	0.00407524	0.00494021	0.0165563	0.0219446	0.0119978	0.0112254	0.0146602	0.00467539	0.00223376	0.00342427	0.00239457	0.00908186	0.00517024	0.0026723	0.00317505	0.00716613	0.00607087	0.00741228	0.00395443	0.00415918	0.0151033	0.00314597	0.0150949	0.00551323	0.00479349	0.0021112	0.0019276	0.0067594	0.0122307	0.00639521	0.00875551	0.00298595	0.00864552	0.0103924	0.00783439	0.00717722	0.0383381	0.0197283	0.0131777	0.00974511	0.0174633	0.0061407	0.00575128	0.0131698	0.0128195	0.0123077	0.00835515	0.00478269	0.0202063
ENSG00000174021	0.00413672	0.0169799	0.00476978	0.00657494	0.00150058	0.0108997	0.00333516	0.00510647	0.0247038	0.0224601	0.00178388	0.0195567	0.00485989	0.00485767	0.00408925	0.00362582	0.0167262	0.0297238	0.0148691	0.00771876	0.00697546	0.00338961	0.0040084	0.00348236	0.024677	0.00436925	0.0525333	0.00618246	0.0235251	0.0068035	0.00635067	0.00986319	0.0205559	0.00938705	0.00401328	0.0199611	0.00596852	0.00478786	0.00647941	0.00660325	0.00976826	0.0167369	0.0105939	0.00508482	0.0074125	0.00736801	0.0355477	0.0258826	0.0260116
ENSG00000122432	0.0109773	0.012806	0.0266452	0.0117076	0.00740383	0.0184203	0.0148055	0.0111174	0.0104557	0.00723863	0.0021595	0.0115085	0.0115113	0.00635145	0.0305547	0.00939242	0.00879413	0.00736991	0.0125537	0.0148632	0.0122704	0.012056	0.00233406	0.00560983	0.0128501	0.00527184	0.00839958	0.00863243	0.0112174	0.00917276	0.0126202	0.00558531	0.0101087	0.00468412	0.00929008	0.0119674	0.00501578	0.00352122	0.0136588	0.00489693	0.00576951	0.010406	0.00654074	0.00927384	0.00830816	0.00689793	0.00732513	0.0127601	0.00410535
ENSG00000117151	0.0137712	0.0185173	0.0268569	0.0138427	0.00599319	0.0151541	0.020668	0.0151499	0.0121075	0.00897344	0.00273982	0.016508	0.016996	0.0106846	0.018618	0.00935754	0.0102533	0.0105918	0.012961	0.00827857	0.0121152	0.00826934	0.00577895	0.00821458	0.0139955	0.00770123	0.00917288	0.00967916	0.0132178	0.00889526	0.0141978	0.0101643	0.0128204	0.0078228	0.0133301	0.0152089	0.00279429	0.00989634	0.025015	0.00876141	0.00641051	0.01214	0.00649403	0.0121196	0.0112502	0.00834433	0.0101591	0.0188142	0.00878752
ENSG00000117155	0.0342186	0.0160617	0.0135519	0.00196268	0.00105782	0.00790874	0.00298515	0.00749716	0.0030197	0.00685812	0.00929881	0.00221444	0.00914714	0.0036597	0.000837642	0.00379304	0.029146	0.0102637	0.0361039	0.00299066	0.00331097	2.54197e-05	2.54197e-05	0.00507592	0.00327237	0.0034168	0.0140241	0.0128305	0.0164762	0.0124559	0.0187158	0.00241117	0.0127998	0.0354141	0.0157538	0.0240723	0.00128911	0.0018655	0.00322275	0.0014198	0.0151889	0.00603953	0.00657591	0.0142843	0.007274	0.00396721	2.54197e-05	0.0149147	0.00548942
ENSG00000153898	0.165467	0.331301	0.271783	0.207452	0.605663	0.195649	0.222021	0.163192	0.175952	0.192949	0.0303017	0.750509	0.0650554	0.0379686	0.0521137	0.108474	0.0630902	0.0876088	0.175031	0.22977	0.288299	0.211386	0.187625	0.359609	0.205258	0.893867	0.200476	0.177456	0.0576479	0.248222	0.0774742	0.0324199	0.253301	0.0285446	0.143446	0.269138	0.227596	0.651713	0.212448	0.256692	0.139171	0.104613	0.18202	0.0618524	0.226208	0.200369	0.18887	0.297051	0.326182
ENSG00000162643	0.0287849	0.0542794	0.0274742	0.100185	0.211104	0.0957578	0.162521	0.0270978	0.0264941	0.012201	0.0453408	0.0115413	0.00926353	0.0500097	0.00688092	0.0115229	0.0154966	0.111019	0.0186991	0.0518574	0.166541	0.0301732	0.149558	0.0543106	0.0263335	0.0506812	0.139122	0.0869153	0.0337279	0.0510564	0.00932687	0.37485	0.153748	0.135621	0.00530681	0.145635	0.158789	0.220497	0.159179	0.442593	0.129997	0.0373441	0.0258833	0.0295203	0.0519684	0.0263898	0.101725	0.0250921	0.0430616
ENSG00000055732	0.0327043	0.0565996	0.0431426	0.256404	0.528134	0.228198	0.28911	0.0306098	0.0293401	0.0130734	0.0454643	0.012424	0.0102296	0.054399	0.0273661	0.0116442	0.0163203	0.13722	0.0189542	0.308145	0.389417	0.334972	0.40525	0.0637679	0.0286274	0.0716454	0.252742	0.131363	0.0405063	0.0486358	0.00856223	0.475663	0.207028	0.343278	0.00682874	0.153818	0.305852	0.435442	0.358989	0.893867	0.316622	0.0468858	0.0339369	0.0366099	0.0447999	0.0288644	0.115152	0.0284874	0.0388312
ENSG00000097096	0.0140402	0.0126287	0.00269314	0.018872	0.0260073	0.0152218	0.0178524	0.00635826	0.00892803	0.0106726	0.175362	0.00660222	0.0161046	0.00649753	0.010846	0.0015264	0.00901932	0.0186754	0.0164879	0.0285198	0.0176195	0.00263241	0.0177829	0.00600229	0.011224	0.01526	0.0135546	0.00826239	0.00923767	0.0163658	0.0201963	0.0157297	0.0115847	0.0423449	0.0317127	0.0134846	0.0138216	0.0242294	0.00381445	0.0191841	0.0173929	0.00725835	2.54197e-05	0.0145245	0.00323308	0.00420728	0.00101926	0.0116882	0.00425484
ENSG00000162642	0.00427673	0.00573391	0.00614946	0.00601899	0.00711976	0.01245	0.004739	0.00344359	0.00172434	0.00398932	0.00423555	0.00331656	0.00526999	0.00387254	0.00476871	0.0045977	0.00527845	0.00740096	0.00494599	0.00366232	0.00223077	0.00392571	0.014533	0.00382254	0.00306364	0.00222013	0.00483848	0.0063119	0.00610762	0.00642641	0.00871795	0.00693569	0.00592792	0.0160135	0.00522487	0.00558219	0.00245493	0.00622629	0.00230696	0.00218705	0.00502274	0.00253908	0.0121541	0.00535034	0.00244923	0.00395742	0.0040982	0.00515153	0.00500284
ENSG00000142867	0.00916459	0.011477	0.00632789	0.0300057	0.0167068	0.00705806	0.00882234	0.00687739	0.0121267	0.00769551	0.00262943	0.00584086	0.00650655	0.00281722	0.00665533	0.00802965	0.00687324	0.0109893	0.0107375	0.00668274	0.0140613	0.00572332	2.54197e-05	0.00248703	0.00580982	0.00266129	0.0106365	0.0217158	0.0178672	0.00918507	0.0100546	0.00714395	0.0116474	0.00840713	0.00478383	0.0159112	0.00619869	0.0111143	0.0134689	0.0112354	0.0120894	0.00185133	0.00691448	0.00643292	0.0168434	0.0152518	0.00862746	0.00653859	0.00853544
ENSG00000223653	0.00732611	0.00316522	0.00878402	0.0018128	0.00311645	0.0024555	0.00137572	0.00471764	0.00446563	0.00883007	0.0760155	0.0018973	0.0152673	0.00299237	0.00325007	0.0202372	0.00558955	0.00579082	0.00876054	0.00137603	0.0012058	0.00161648	0.00493445	0.00251841	0.00731323	0.00327312	0.00926019	0.065051	0.00739611	0.00258737	0.0111277	0.0150328	0.00358222	0.030508	0.0182427	0.00460708	0.00120871	0.00134312	0.00100417	0.0013951	0.00786062	0.0215994	0.00261153	0.00416809	0.0100946	0.00495639	0.00634162	0.00857787	0.00619671
ENSG00000153904	0.00602085	0.0022092	0.00596988	0.00172684	0.00335089	0.00232449	0.00140301	0.00596892	0.00496734	0.00680087	0.165061	0.00160418	0.0108697	0.00369368	0.00376346	0.0121362	0.00461752	0.00470259	0.0100322	0.00136592	0.00117044	0.00156995	0.00443687	0.00258861	0.00468281	0.00273993	0.00882729	0.0591439	0.00590338	0.00376925	0.00733551	0.0100442	0.00337459	0.0237345	0.0171409	0.0032632	0.00129286	0.00123272	0.000943324	0.00133422	0.00841074	0.0184382	0.00285227	0.00493079	0.00720755	0.00526201	0.00578495	0.0075023	0.00279054
ENSG00000282057	0.0245336	0.00554585	0.0228838	0.0317943	0.0508714	0.0298013	0.033569	0.017405	0.0119328	0.0433277	0.224258	0.0435521	0.0623746	0.0548139	0.0352313	0.00326164	0.0387898	0.0125004	0.0410472	0.0307731	0.0278265	0.0324937	0.0359948	0.0244714	0.0239728	0.00542631	0.0658374	0.0570554	0.0303806	0.0334033	0.0306179	0.0464085	0.0335082	0.172517	0.0402149	0.00905103	0.0265349	0.0568897	0.0258319	0.0305092	0.0301678	0.0524875	0.0470093	0.0222627	0.0338562	0.0255233	0.0366652	0.00906235	0.00189217
ENSG00000142871	0.00402631	0.00347899	0.00150834	0.00805516	0.0198762	0.0138258	0.0086627	0.00227907	0.00246864	0.00352888	0.0152089	0.00368463	0.00539299	0.00455268	0.00541326	0.00460489	0.00390589	0.00334266	0.00502845	0.00661022	0.00980322	0.00513568	0.00574984	0.00242357	0.00292051	0.00140262	0.0048958	0.00223653	0.00326757	0.00459149	0.00535106	0.00240435	0.003313	0.0208328	0.0032702	0.00378426	0.0112083	0.0560514	2.54197e-05	0.0106337	0.0137361	0.00449878	0.00456172	0.00293318	0.00456497	0.00428923	0.00394778	0.0023284	0.00299729
ENSG00000117174	0.0457405	0.0405662	0.0497451	0.0263911	0.0234143	0.0522773	0.0351563	0.0649324	0.0526164	0.0412713	0.0610444	0.0512535	0.0441979	0.0535443	0.0328246	0.0424511	0.042446	0.0584258	0.0399773	0.0290467	0.0371829	0.0333436	0.0348058	0.0739653	0.0559706	0.0370663	0.0446728	0.047732	0.0366543	0.0632719	0.0374036	0.0603429	0.0431021	0.0811922	0.0485204	0.05631	0.047587	0.0401878	0.0374636	0.0284977	0.0401489	0.0395281	0.0502425	0.047498	0.0449865	0.0504801	0.0455076	0.0574331	0.0375763
ENSG00000171502	0.215475	0.464828	0.0105924	0.00767002	0.0926557	0.0150076	0.140533	0.0227764	0.031336	0.0147977	0.0978628	0.159078	0.0572422	0.0210331	0.00769481	0.0455383	0.285321	0.158173	0.299747	0.123258	0.0308405	0.0653548	0.0583103	0.0222946	0.0366877	0.0270448	0.0575474	0.149874	0.116053	0.125227	0.0707059	0.130243	0.0937641	0.204895	0.139456	0.507698	0.0217118	0.0799193	0.0413516	0.0467642	0.0773368	0.0907935	0.143133	0.0426955	0.77945	0.0353513	0.0495942	0.0251705	0.24001
ENSG00000122417	0.01217	0.0162968	0.0116773	0.00239612	0.00504497	0.00880877	0.00450044	0.0146626	0.0110852	0.0105026	0.00526533	0.00858057	0.0106337	0.00380934	0.00376547	0.00693473	0.010427	0.0127588	0.0118627	0.00388459	0.0047217	0.00741153	0.00914165	0.00913904	0.0117537	0.0231673	0.0109631	0.0118824	0.0154919	0.0138251	0.0129106	0.00696013	0.00526957	0.0167418	0.0253963	0.0123045	0.00476458	0.00600729	0.00471615	0.00450305	0.0147695	0.00886815	0.00507329	0.00635735	0.0132292	0.00743054	0.00743534	0.0107998	0.00806839
ENSG00000137975	0.242085	0.287292	0.169857	0.222853	0.325112	0.218843	0.208288	0.341897	0.36919	0.345426	0.537053	0.355471	0.0176246	0.216854	0.00213141	0.0194265	0.285435	0.300518	0.70567	0.233861	0.336942	0.24384	0.209493	0.246123	0.401837	0.0190172	0.400101	0.320854	0.498751	0.0561316	0.0256104	0.357222	0.493407	0.494866	0.219504	0.376326	0.275121	0.358553	0.270028	0.262864	0.151293	0.0218184	0.346855	0.118841	0.318418	0.342068	0.0161213	0.350735	0.311359
ENSG00000261737	0.0302665	0.0344474	0.0359658	0.0543052	0.0413384	0.0555112	0.0564239	0.0390974	0.0377633	0.0398491	0.036556	0.0499338	0.0362956	0.036186	0.0199154	0.0339754	0.0355265	0.0344027	0.0243945	0.0550087	0.0516308	0.0524947	0.0969292	0.0372363	0.0398553	0.0348533	0.0415916	0.0529669	0.0343991	0.0417874	0.0361769	0.0349241	0.0366242	0.0468683	0.0371826	0.0388319	0.0544051	0.0378052	0.0519235	0.0251923	0.0555669	0.0326104	0.0440541	0.0356076	0.045197	0.0313583	0.0354855	0.049103	0.0389475
ENSG00000097033	0.00438197	0.00550785	0.00428395	0.00323894	0.00256994	0.0029764	0.003555	0.00360187	0.00380786	0.00593329	0.00271129	0.00407551	0.00427553	0.00336784	0.00169287	0.00415889	0.00390467	0.00421346	0.00466713	0.00520228	0.00470789	0.00250277	0.00381252	0.00234206	0.00473472	0.00395809	0.00649574	0.00590909	0.00474443	0.004956	0.00404153	0.0051454	0.00431866	0.017479	0.00590201	0.00537031	0.00397101	0.00486383	0.00207863	0.00225705	0.00613405	0.00329583	0.00306454	0.00526936	0.00323183	0.00480571	0.00448511	0.00380364	0.00326234
ENSG00000183291	0.000977158	0.00288254	0.000760376	0.00201228	0.000534936	0.0013655	0.00264342	0.00138191	0.00145814	0.00149478	0.00324832	0.00235111	0.00237332	0.00294923	0.00164578	0.000769517	0.00160363	0.00165069	0.000970645	0.00380417	0.00403241	0.0025707	0.00382957	0.00108262	0.00352638	0.0026801	0.00103038	0.00242633	0.00220226	0.00177766	0.0037941	0.00170055	0.000852037	0.00612207	0.00234706	0.0029618	0.00220534	0.00426056	0.00111577	0.00345075	0.00101514	0.00116955	0.00356347	0.00180741	0.000847893	0.00112215	0.00362308	0.00173291	0.0011787
ENSG00000153936	0.0045243	0.000852746	0.00734264	0.0146941	0.012165	0.0049546	0.00366223	0.00772835	0.0060145	0.00469129	0.00358378	0.00881902	0.00774344	0.0049375	0.00951293	0.000693466	0.00466417	0.00208714	0.00411993	0.00504497	0.00516927	0.00247789	0.0129185	0.0037024	0.0112812	0.000510804	0.00586768	0.00543885	0.00561292	0.00727507	0.00455307	0.00372653	0.00779718	0.0259956	0.000493899	0.00756113	0.00650382	0.00668557	0.00178584	0.00129477	0.012207	0.00735911	2.54197e-05	0.00303015	0.00281936	0.00378505	0.00460529	0.00585018	2.54197e-05
ENSG00000267272	0.0151697	0.0448695	0.024249	0.0263791	0.0294582	0.0291356	0.0269528	0.0322634	0.0311682	0.0125644	0.0864224	0.0611925	0.0399122	0.0103139	0.00172182	0.0792502	0.0270363	0.021573	0.0161795	0.0256297	0.0311462	0.0272173	0.0277318	0.0317174	0.0189877	0.0135901	0.024352	0.0477439	0.0134134	0.0295584	0.0298266	0.0414214	0.0261465	0.0902574	0.0639745	0.0439722	0.00863695	0.0299106	0.0276681	0.0147381	0.027859	0.028896	0.0440118	0.0344479	0.01951	0.0292618	0.00681618	0.0492682	0.0527697
ENSG00000143013	0.0127469	0.00917616	0.0290636	0.0232168	0.0129123	0.0108147	0.00586563	0.0109968	0.00741267	0.013634	0.0145962	0.0100967	0.0192719	0.0121577	0.0128413	0.00772311	0.0103665	0.00546888	0.0132746	0.0154762	0.00739724	0.016538	0.013917	0.0102415	0.00919047	0.0122163	0.0165987	0.016703	0.0163059	0.0156412	0.0135905	0.00248546	0.0183183	0.0386368	0.00650289	0.00894756	0.00975057	0.0163074	0.00995537	0.0169362	0.00388355	0.0102768	0.0371131	0.0113166	0.014277	0.0140868	0.00508596	0.0170815	0.0109073
ENSG00000065243	0.00568746	0.00309434	0.00862126	0.00630438	0.0053054	0.0178005	0.0109745	0.00476279	0.0052503	0.00629811	0.00426847	0.00616343	0.00534805	0.00459375	0.00276977	0.00202174	0.00748068	0.00745461	0.00592694	0.00461419	0.0117474	0.00453265	0.00823882	0.0051171	0.0053667	0.00880615	0.00951587	0.00477712	0.00488224	0.00485314	0.00637883	0.0038996	0.00602288	0.00996119	0.00697198	0.00705128	0.0117419	0.00584567	0.0111383	0.00979048	0.0133484	0.00608266	0.00228771	0.0060808	0.00460607	0.00880353	0.00603443	0.00235327	0.00379717
ENSG00000241975	0.0206225	0.0348808	0.0343023	0.0618952	0.0477951	0.0630421	0.0628612	0.0353101	0.0369613	0.0439444	0.0185747	0.0383466	0.0332857	0.0302544	0.0413071	0.0323272	0.0363714	0.0360018	0.0456528	0.0635413	0.050389	0.0601308	0.0592559	0.033634	0.0352206	0.0346108	0.0496466	0.049378	0.0136143	0.0346533	0.0357479	0.0366927	0.0370816	0.0517148	0.0349801	0.0319793	0.0632468	0.0327495	0.0645131	0.0654978	0.0487596	0.0378087	0.0395038	0.0183042	0.0140774	0.0325449	0.0907143	0.0322767	0.0258608
ENSG00000137947	0.0450297	0.0488024	0.0287296	0.00738188	0.0162868	2.54197e-05	2.54197e-05	0.0136633	0.00563131	0.0107362	0.00699451	0.0292911	0.0337306	0.00711143	0.00334812	0.00662563	0.00492753	0.00508967	0.0330763	0.00824366	0.0138809	0.0405442	0.0164475	0.0281255	0.0604408	0.0146342	0.0211588	0.034121	0.00646229	0.0444476	0.0391848	0.0142221	0.0373792	0.0609065	0.0166617	0.0176881	2.54197e-05	0.00220268	0.0227739	0.0148114	0.0393987	0.00339619	0.0347374	0.0249055	0.00904369	0.0310103	0.00960823	0.0378666	0.00405754
ENSG00000137944	0.0113534	0.00748592	0.0104542	0.0399945	0.0323249	0.0413965	0.0232405	0.0128639	0.0142182	0.0164495	0.00780534	0.026055	0.00996878	0.0108009	0.0209088	0.00780759	0.0168628	0.015075	0.0128071	0.029972	0.0408224	0.0235291	0.0275501	0.00979055	0.00971348	0.0332294	0.00976957	0.00773442	0.00839548	0.0117303	0.00633601	0.00722186	0.0107203	0.0239973	0.0189809	0.0184055	0.0468102	0.0269714	0.0557896	0.0443065	0.007706	0.019051	0.025828	0.00778343	0.0250667	0.0183973	0.0112257	0.0149883	0.009366
ENSG00000213516	0.0155706	0.01211	2.54197e-05	0.0332279	0.0220208	0.0214779	0.010081	0.028149	0.0131608	0.0234099	0.00911725	0.0434419	0.0258349	0.0208251	0.00459037	0.00255667	0.0160118	0.0165021	0.0163547	0.0159065	0.0124601	0.0317014	0.0248989	0.0129101	0.0205972	0.021356	0.0147786	0.00375388	0.0130889	0.0058376	0.0202289	0.0135645	0.0246208	0.0353862	0.0107268	0.0174017	0.0258074	0.0139181	0.0189409	0.0172124	0.0114108	0.0184686	0.00303671	0.0222305	0.00851836	0.013328	0.0230049	0.0223911	0.0103054
ENSG00000117226	0.112947	0.191932	0.134509	0.484447	0.427728	0.41252	0.504092	0.159885	0.160539	0.180714	0.187727	0.261516	0.0953166	0.185681	0.142791	0.11501	0.246826	0.18152	0.133273	0.502148	0.407883	0.433623	0.478892	0.278114	0.15252	0.417733	0.159899	0.367402	0.0854714	0.17098	0.0755811	0.061414	0.210936	0.135913	0.414644	0.178116	0.37113	0.442935	0.341317	0.495747	0.384423	0.225596	0.27165	0.11419	0.110535	0.222709	0.185426	0.1984	0.0830964
ENSG00000117228	0.0037876	0.0121979	0.00526779	0.00466222	2.54197e-05	0.0138803	0.00819522	0.0100525	0.00903661	0.00547609	0.0312148	0.0189717	0.00512434	0.00264749	0.0050474	0.00685302	0.00282028	0.0039674	0.00599459	0.00885821	0.00311133	0.0146168	0.0133707	0.00438366	0.0116943	0.00502813	0.00448485	0.00342666	0.00504197	0.0045248	0.00642234	0.0046507	0.0116657	0.00628225	0.00438453	0.00976208	0.0212234	2.54197e-05	0.0168203	0.0221479	0.00366859	0.00863888	0.00533841	0.00463292	0.00447032	0.0074349	0.00436739	0.00996896	0.00644908
ENSG00000234518	0.0730278	0.0783721	0.0601855	0.905097	0.893867	0.940923	0.893867	0.0357462	0.0337273	0.304918	0.893867	0.163801	0.0653698	0.0381639	0.437306	0.0653664	0.0955354	0.0584637	0.074408	0.893867	0.893867	0.893867	0.893867	0.126483	0.0310722	0.893867	0.348873	0.100052	0.0454778	0.0282336	0.0596888	0.0257906	0.247591	0.0434054	0.0585547	0.0544851	0.893867	0.801483	0.893867	0.893867	0.893867	0.283538	0.29038	0.0363031	0.22509	0.381485	0.18205	0.0931818	0.0650024
ENSG00000162645	0.00207549	0.00400475	0.00250173	0.0113671	2.54197e-05	0.00668542	0.00473745	0.0035938	0.00319181	0.00324777	0.0322006	0.00301738	0.00199944	0.00178495	0.00387123	0.00335056	0.00218331	0.00382982	0.00398808	0.00514707	0.0036092	0.0157828	0.0091179	0.0025076	0.00354607	0.00593744	0.00264216	0.00499489	0.00168169	0.00351177	0.00239594	0.0022066	0.00407096	0.00490044	0.00418427	0.00434856	0.00628317	0.0122216	0.00223646	0.0173067	0.00933671	0.00320291	0.0010651	0.00213498	0.00370305	0.00406873	0.00371755	0.00319651	0.00161642
ENSG00000162654	0.0185435	0.0371219	0.0121071	0.0210132	0.0312005	0.0220039	0.0205085	0.0142268	0.0166783	0.0181071	0.116391	0.0594373	0.0237351	0.0119516	0.030295	0.0101892	0.0154634	0.0162693	0.0135331	0.010898	0.0202467	0.018547	0.0296812	0.0141343	0.0156776	0.0468	0.0167767	0.0246348	0.0114461	0.015381	0.0258513	0.0114926	0.0179739	0.0215978	0.0100002	0.0220338	0.0278429	0.0228012	0.0236121	0.0255948	0.0271717	0.0204011	0.0179356	0.0173718	0.0181998	0.00725112	0.0235814	0.0243276	0.0182569
ENSG00000154451	0.0647018	0.0428116	0.0332834	0.0735235	0.0846253	0.0752546	0.0784877	0.0574984	0.0549565	0.0554823	0.0687463	0.0670031	0.0640471	0.0250958	0.0413815	0.0323177	0.0262251	0.0229091	0.0421292	0.0772261	0.0894088	0.0494932	0.0651289	0.036438	0.0554139	0.0781587	0.0765771	0.0481127	0.0479135	0.0124499	0.0664594	0.0162825	0.049673	0.0232643	0.0516516	0.0585622	0.080927	0.0799226	0.0769302	0.0856346	0.0507436	0.0370976	0.0398718	0.019221	0.055587	0.0415806	0.0439073	0.0508158	0.0520929
ENSG00000225492	0.175333	0.218483	0.188764	0.112011	0.221724	0.0898111	0.0893584	0.206968	0.112357	0.0811292	0.405484	0.364675	0.116515	0.14868	0.301438	0.0491693	0.12008	0.149344	0.259726	0.0670526	0.0372916	0.0623208	0.0862721	0.176216	0.178013	0.272583	0.0508623	0.275221	0.0539255	0.194222	0.210652	0.0714461	0.260309	0.31019	0.253862	0.184526	0.10841	0.123965	0.0959999	0.0741553	0.0430927	0.00974472	0.243774	0.0520315	0.385241	0.0168864	0.0722369	0.175174	0.411738
ENSG00000197147	0.0211125	0.0269161	0.0135848	0.0161143	0.0833666	0.00277095	0.000220962	0.0186334	0.0199472	0.0109655	0.0500866	0.0113404	0.0221594	0.0116449	0.00273124	0.0213923	0.0259239	0.0263422	0.010457	0.0114553	0.00990637	0.0118974	0.0158199	0.00973331	0.013251	0.0168496	0.0117565	0.0167753	0.0237263	0.0152172	0.0272133	0.0281979	0.0100408	0.0755575	0.0142742	0.0307214	0.00667355	0.103468	0.00681806	0.00300935	0.0105642	0.00477702	0.0761724	0.0151132	0.00898584	0.00484394	0.00587738	0.00622875	0.00701532
ENSG00000231999	0.0144408	0.00908326	0.0120218	0.00578179	0.0335623	0.00247084	0.00148929	0.0129083	0.00853417	0.0161272	0.0536606	0.00969081	0.0219553	0.011888	0.00353947	0.0123456	0.0336519	0.0130949	0.0157345	0.00335699	0.0050601	0.00917638	0.0151458	0.0122761	0.0112333	0.0130744	0.0256365	0.024169	0.0195631	0.0126183	0.0216777	0.0115385	0.0109718	0.0549558	0.0128524	0.0156349	0.0046284	0.0776951	0.00466187	0.00435069	0.00688934	0.00664051	0.0251183	0.0136786	0.00598889	0.00366506	0.00854606	0.00528493	0.00602887
ENSG00000230735	0.0208527	0.0475005	0.0379134	0.0477004	0.0353884	0.0507969	0.0429517	0.048544	0.0297122	0.0555904	0.0625853	0.0643527	0.0154835	0.006155	0.00771031	0.051357	0.0290959	0.012555	0.0151723	0.0377165	0.0366764	0.043519	0.0508515	0.0393537	0.0520404	0.0607987	0.024365	0.0533768	0.0122715	0.0518401	0.0429156	0.0149314	0.0327604	0.0706841	0.0281265	0.0682787	0.0378072	0.0320553	0.0451671	0.0368412	0.053238	0.0412475	0.0458531	0.0432762	0.0271812	0.00750251	0.0292277	0.0496022	0.00624563
ENSG00000171488	0.0361542	0.0411472	0.0521629	0.0464505	0.086733	0.0811914	0.0365832	0.0507873	0.0542145	0.0347044	0.160982	0.0649667	0.030111	0.0442359	0.00914188	0.0280903	0.0460204	0.0688831	0.0377532	0.0291076	0.100701	0.094509	0.068449	0.0518943	0.0599626	0.0354883	0.0434433	0.0787295	0.0363531	0.0554145	0.039896	0.0556546	0.0383017	0.0442299	0.041505	0.0523754	0.121053	0.0896217	0.106312	0.0414832	0.0504681	0.0504297	0.0625668	0.034409	0.0360124	0.0330824	0.0140548	0.036643	0.0456791
ENSG00000162664	0.00578457	0.00464181	2.54197e-05	0.00630027	0.00421995	0.00281701	0.00308417	0.00292075	0.00335118	0.00504392	0.00155077	0.00312109	0.00493132	0.00193532	0.00279263	0.00575531	0.00621774	0.00536634	0.00462123	0.00287613	0.00459967	0.00381633	0.00264813	0.00321436	0.00443081	0.00151518	0.00831774	0.00397758	0.00313158	0.00637514	0.00436174	0.00369381	0.00383199	0.0196012	0.00314616	0.00286533	0.00533526	0.00412143	0.00832552	0.00238387	0.00300055	0.00571141	0.0047434	0.00517367	0.00303708	0.00400939	0.000735523	0.00253761	0.00366491
ENSG00000233593	0.0570141	0.0342953	0.0274255	0.0470021	0.00789661	0.0563634	0.0369434	0.0322125	0.0350235	0.0524614	0.136366	0.0196625	0.051688	0.0385785	0.0175839	0.00755193	0.0364258	0.0349109	0.0343495	0.0353567	0.0233367	0.0207896	0.0279353	0.0439961	0.0368117	0.0206801	0.0213059	0.0209767	0.021768	0.0540583	0.0533106	0.0469581	0.0261718	0.165964	0.0127957	0.043493	0.0963649	0.00649137	0.022069	0.0129746	0.0110828	0.0552797	0.0524613	0.0400538	0.00884609	0.0177086	0.0398894	0.0500347	2.54197e-05
ENSG00000122482	0.00965978	0.0117752	2.54197e-05	0.0118463	0.0069127	0.0116771	0.0224608	0.00829672	0.0113709	0.00439748	0.000772609	0.00811272	0.011695	0.00268804	0.00835054	2.54197e-05	0.00696445	0.00135593	0.0112798	0.00522068	0.00195808	0.0135344	0.0159496	0.00578758	0.00792376	0.00125703	0.0250399	0.00309738	0.00816435	0.00966471	0.0140291	0.00717272	0.0114682	0.0588696	0.0100863	0.00668864	0.0040151	0.00768756	0.00131292	0.015814	0.0046907	0.00831529	0.00452282	0.0176686	0.00232598	0.0104737	0.00639647	0.0103395	0.00234883
ENSG00000162669	0.145625	0.348444	0.142069	0.245068	0.0158333	0.40844	0.629799	0.111137	0.107786	0.0995871	1.35909	0.301364	0.320913	0.229782	0.00788754	0.0979149	0.211675	0.280031	0.178881	0.278483	0.124506	0.133611	0.403348	0.16398	0.190926	0.342549	0.162541	0.313785	0.303015	0.21095	0.33344	0.198231	0.0532152	0.893867	0.855599	0.893867	0.297914	0.0558572	0.356548	0.234077	0.282284	0.204339	0.0541301	0.364383	0.0683729	0.0302634	0.209174	0.210284	0.059374
ENSG00000097046	0.0556224	0.0711084	0.0493378	0.0403318	0.0185527	0.0596478	0.0402153	0.0593471	0.0391856	0.06889	0.0122063	0.0697947	0.140826	0.0599349	0.00229441	0.0736018	0.0496781	0.0803327	0.0647825	0.0222074	0.0392438	0.0226441	0.0592861	0.0622478	0.0573474	0.0251197	0.0225213	0.0543676	0.0732963	0.0747326	0.119501	0.0231027	0.072712	0.109593	0.0335554	0.107652	0.0256902	0.0202377	0.0256341	0.0224526	0.0508126	0.0713244	0.064118	0.0641065	0.0540041	0.0369586	0.0493347	0.062468	0.0467178
ENSG00000069702	0.00218971	0.0078311	0.00156954	0.0143147	0.0122468	0.0277011	0.00659645	0.00203989	0.00201694	0.00458276	0.165174	0.0180337	0.00401542	0.00192961	0.00343641	0.00227349	0.00207623	0.00446488	0.00231754	0.00404592	0.00574343	0.00753027	0.0258681	0.00160082	0.00212317	0.00267186	0.00586619	0.00590761	0.00339919	0.00286907	0.00341093	0.006283	0.003001	0.0113757	0.00157969	0.00403394	0.00957127	2.54197e-05	0.0211211	0.0100445	0.00781535	0.00265227	0.0027728	0.00312977	0.00323763	0.00823075	0.00359152	0.00123018	0.00176492
ENSG00000069712	0.0182527	0.0331633	0.020772	0.0475233	0.0199244	0.0393332	0.0453243	0.0170204	0.0103652	0.061603	0.0570909	0.0337666	0.0347081	0.0293608	0.00499881	0.00690337	0.0267998	0.0126158	0.031027	0.0272872	0.0271142	0.0313772	0.023859	0.0315406	0.0243761	0.00473099	0.0428613	0.0349732	0.0207585	0.0313902	0.0596561	0.0379097	0.0303016	0.0475979	0.0149998	0.038095	0.0342049	0.0221121	0.0399814	0.036912	0.0154264	0.0384674	0.0350074	0.0223018	0.0112094	0.0154621	0.0148848	0.0296115	0.0220411
ENSG00000174842	0.0166193	0.0150263	0.0185183	0.0260488	0.0153783	0.0277917	0.0261981	0.0237135	0.0119323	0.0254802	0.00643108	0.0220588	0.0125424	0.00532385	0.00772792	0.0118557	0.0132102	0.00601764	0.0224717	0.0299032	0.0230385	0.026132	0.0300854	0.0247085	0.0136561	0.00671706	0.0194908	0.0197258	0.0128766	0.0177445	0.0178102	0.00907728	0.0172989	0.0229221	0.0290979	0.0248148	0.0201924	0.0100765	0.0108292	0.0379207	0.0320022	0.0112786	0.0189049	0.00854455	0.0161132	0.00423486	0.0130102	0.0100234	0.0116506
ENSG00000122484	0.0068294	0.00174975	0.00998303	0.000903131	0.0018824	0.0208418	0.00808895	0.0061774	0.00817748	0.0123878	0.0065543	0.0080304	0.00918064	0.00622868	0.000815253	0.0084676	0.00777826	0.00764565	0.014817	0.00873107	0.00575631	0.0085796	0.0121538	0.00438155	0.00824614	0.00218504	0.0162625	0.0162398	0.00528942	0.0054319	0.00785958	0.00418119	0.00454587	0.0760012	0.00644878	0.0120953	0.0116403	0.00349415	0.00396506	0.00266374	0.000914729	0.00381665	0.00721144	0.0134348	0.00434137	0.00590949	0.00822739	0.00637906	0.00728329
ENSG00000067208	0.00671924	0.00416417	0.00204635	0.0192279	0.00441158	0.0112104	0.0175901	0.0113314	0.00862016	0.00825059	0.033337	0.00290415	0.00707539	0.00715826	0.00191052	0.0114354	0.00879202	0.0121321	0.00699304	0.0115885	0.0109442	0.00948959	0.0130546	0.00871305	0.00989419	0.00841141	0.0111565	0.0142678	0.00526983	0.0132292	0.00501451	0.00966902	0.00261882	0.0426266	0.00223254	0.00737252	0.0180569	0.00256155	0.00911319	0.00760074	0.0289366	0.0132886	0.0143635	0.00793092	0.00851617	0.00480565	0.00607854	0.00423294	0.0046347
[truncated: 26,091 more rows]
[truncated: 2 more columns]

## Sheet: legend
Supplemental Table S4: Table of all VGHI estimates. VGHI and predictions from VGI are joined, with VGH taking precedence if both exist.
gene_id	Ensembl gene id
ADPSBQ	VGH in Adipose - Subcutaneous
ARTAORT	VGH in Artery - Aorta
BLDDER	VGH in Bladder
BRNAMY	VGH in Brain - Amygdala
BRNCHB	VGH in Brain - Cerebellum
BRNHPP	VGH in Brain - Hippocampus
BRNPTM	VGH in Brain - Putamen (basal ganglia)
CLNSGM	VGH in Colon - Sigmoid
[truncated: 43 more rows]
